# Supplementary material for: Genetic validation of PfFKBP35 as an antimalarial drug target
Source: bioRxiv preprint, doi:10.1101/2022.12.09.519720, version 4 (2023-08-19)
Supplement: CETSA data for FK506 [file 519720_file04.xlsx]

## Sheet: lysate
id	description	condition	0 µM	0.0030517578125 µM	0.01220703125 µM	0.048828125 µM	0.1953125 µM	0.78125 µM	3.125 µM	12.5 µM	50 µM	200 µM	sumUniPeps	sumPSMs	countNum	EC50	R2	Slope
Q8IHN4	Antigen 332, DBL-like protein OS=Plasmodium falciparum (isolate 3D7) OX=36329 GN=PF3D7_1149000 PE=4 SV=2	37C	1	1.02762	1.02018	1.02642	1.02388	1.00738	1.03021	1.02908	1.06528	1.05738	192	518	2	0.657835	0.587964	0.212113
Q8IEK1	M1-family alanyl aminopeptidase OS=Plasmodium falciparum (isolate 3D7) OX=36329 GN=PF3D7_1311800 PE=1 SV=1	37C	1	0.978364	0.988955	0.985488	0.982334	0.993994	0.979083	0.994111	1.01212	0.974848	57	653	2	415366	0.115801	5.21636e-05
Q8I0U8	Merozoite surface antigens OS=Plasmodium falciparum (isolate 3D7) OX=36329 GN=PF3D7_0930300 PE=4 SV=1	37C	1	1.0773	1.05776	1.09224	1.06267	1.01396	1.05584	1.02128	1.02644	0.987698	70	505	2	7.75956	0.339541	-0.752371
A0A5K1K8J3	Glideosome-associated connector OS=Plasmodium falciparum (isolate 3D7) OX=36329 GN=PF3D7_1361800 PE=4 SV=1	37C	1	0.995278	0.997915	0.999496	0.998469	1.00405	0.993416	0.99627	1.0039	0.970639	93	309	2	470.384	0.87148	-4.36585
Q8I0V4	Endoplasmin, putative OS=Plasmodium falciparum (isolate 3D7) OX=36329 GN=PF3D7_1222300 PE=1 SV=1	37C	1	0.995606	1.0069	1.02014	1.00358	1.01961	1.02134	1.05838	1.07284	1.16598	56	465	2	43.7636	0.934755	0.911278
Q8IC05	Heat shock protein 90 OS=Plasmodium falciparum (isolate 3D7) OX=36329 GN=PF3D7_0708400 PE=1 SV=1	37C	1	0.982064	0.999484	0.992758	0.987533	0.982229	0.980934	0.97476	0.994327	0.993811	44	569	2	0.145069	0.214688	-0.0223559
Q9TY95	Serine-repeat antigen protein 5 OS=Plasmodium falciparum (isolate 3D7) OX=36329 GN=SERA5 PE=1 SV=1	37C	1	0.997646	0.983251	0.992828	0.977814	0.996114	0.969935	0.941433	0.920571	0.87744	48	346	2	40.944	0.963027	-0.680652
Q8II24	Heat shock protein 70 OS=Plasmodium falciparum (isolate 3D7) OX=36329 GN=PF3D7_1134000 PE=3 SV=1	37C	1	0.989252	0.986811	1.00044	0.973616	0.996933	0.985425	1.00018	0.976448	0.99469	37	322	2	1.77019e+40	0.118448	-0.00568461
A0A143ZZ61	Phosphopyruvate hydratase OS=Plasmodium falciparum (isolate 3D7) OX=36329 GN=PF3D7_1015900 PE=3 SV=1	37C	1	0.954366	0.998279	0.971332	0.972936	0.971953	0.979895	0.971731	0.975111	0.976542	26	750	2	13.2411	0.35698	4.16824e-05
Q8IIS9	Polyadenylate-binding protein-interacting protein 1, putative OS=Plasmodium falciparum (isolate 3D7) OX=36329 GN=PF3D7_1107300 PE=4 SV=1	37C	1	0.982462	0.99282	0.986541	0.983187	0.986449	0.982276	0.987869	0.999505	0.983377	103	317	2	65058.5	0.361429	6.96652e-05
Q8IC01	Heat shock protein 110 OS=Plasmodium falciparum (isolate 3D7) OX=36329 GN=PF3D7_0708800 PE=4 SV=1	37C	1	0.981261	1.00229	0.982707	0.970218	0.985101	0.969466	0.976612	0.959301	0.926628	45	415	2	14.6414	0.730549	-0.42336
Q76NL8	Falcilysin OS=Plasmodium falciparum (isolate 3D7) OX=36329 GN=PF3D7_1360800 PE=1 SV=1	37C	1	0.988126	0.991902	0.994823	0.985893	0.999455	0.985907	1.01828	1.03378	1.03119	57	380	2	10.7986	0.924535	3.67161
C0H5H0	Endoplasmic reticulum chaperone GRP170 OS=Plasmodium falciparum (isolate 3D7) OX=36329 GN=PF3D7_1344200 PE=4 SV=1	37C	1	0.984832	0.995788	0.98846	0.978848	0.990844	0.981913	0.995646	1.00636	0.992056	57	358	2	10.7416	0.301204	4.38805
Q8I5H4	Polyadenylate-binding protein OS=Plasmodium falciparum (isolate 3D7) OX=36329 GN=PF3D7_1224300 PE=3 SV=1	37C	1	0.993695	1.004	1.01334	0.9954	1.01086	1.00621	1.0142	1.00677	0.997338	38	278	2	0.0105409	0.176664	0.671107
Q8I2Z8	Probable ATP-dependent 6-phosphofructokinase OS=Plasmodium falciparum (isolate 3D7) OX=36329 GN=PF3D7_0915400 PE=3 SV=1	37C	1	1.0056	1.01834	1.01368	1.02552	1.00624	1.01717	0.996899	1.01762	0.987698	58	337	2	6.09024	0.1866	-1.27019
P27362	Phosphoglycerate kinase OS=Plasmodium falciparum (isolate 3D7) OX=36329 GN=PGK PE=1 SV=1	37C	1	0.952731	0.98809	0.96559	0.968303	0.972696	0.97334	0.983605	0.993462	1.00089	31	503	2	17.5428	0.366828	1.66057
Q8IHY0	Protein phosphatase PPM2 OS=Plasmodium falciparum (isolate 3D7) OX=36329 GN=PF3D7_1138500 PE=3 SV=2	37C	1	1.00062	1.00146	1.0009	1.00181	1.00682	0.982156	0.97405	0.963105	0.925865	43	254	2	44.3447	0.949085	-0.749144
Q8IIQ7	RNA-binding protein, putative OS=Plasmodium falciparum (isolate 3D7) OX=36329 GN=PF3D7_1110400 PE=4 SV=1	37C	1	0.992547	0.978702	0.991431	0.993749	0.998039	0.984066	1.00035	1.00479	1.00627	57	292	2	2.06744	0.334067	0.728277
Q8III5	Insulinase, putative OS=Plasmodium falciparum (isolate 3D7) OX=36329 GN=PF3D7_1118300 PE=4 SV=1	37C	1	0.981609	0.982549	0.977803	0.978367	0.98423	0.954064	0.934702	0.940653	0.918301	61	233	2	2.99149	0.905982	-1.7905
C6KT64	Leucyl-tRNA synthetase OS=Plasmodium falciparum (isolate 3D7) OX=36329 GN=PF3D7_0622800 PE=1 SV=1	37C	1	0.995805	0.988806	0.990798	0.987495	1.00873	0.984895	1.00082	1.00517	0.985101	61	257	2	0.000452169	0.0459107	-0.000107366
Q8III6	Heat shock protein 90, putative OS=Plasmodium falciparum (isolate 3D7) OX=36329 GN=PF3D7_1118200 PE=3 SV=1	37C	1	1.01644	1.01547	1.02149	1.01354	1.00721	1.00942	0.996757	0.953955	0.963979	44	258	2	16.0982	0.924249	-3.49405
Q8IB24	Heat shock protein 70 OS=Plasmodium falciparum (isolate 3D7) OX=36329 GN=PF3D7_0818900 PE=3 SV=1	37C	1	0.966211	0.989759	0.967318	0.975286	0.981408	0.975948	0.991957	0.99712	1.00357	27	684	2	11.1513	0.448432	3.91451
Q8I2X4	Heat shock protein 70 OS=Plasmodium falciparum (isolate 3D7) OX=36329 GN=PF3D7_0917900 PE=3 SV=1	37C	1	0.962651	0.984471	0.970161	0.970512	0.981544	0.980114	1.00238	1.00574	1.03499	32	652	2	28.8043	0.748424	0.937809
A0A143ZVW7	Uncharacterized protein OS=Plasmodium falciparum (isolate 3D7) OX=36329 GN=PF3D7_0704300 PE=4 SV=1	37C	1	1.01408	0.992631	1.00459	0.998255	1.01542	1.0019	1.04883	1.05154	1.07663	69	235	2	9.03798	0.898894	2.98906
O96275	Liver stage antigen 3 OS=Plasmodium falciparum (isolate 3D7) OX=36329 GN=PF3D7_0220000 PE=4 SV=1	37C	1	0.967436	1.01919	1.0053	0.99912	0.977977	1.01371	1.01942	1.05716	1.0715	48	157	2	13.0164	0.773677	1.32506
C6KT34	Cell division cycle protein 48 homologue, putative OS=Plasmodium falciparum (isolate 3D7) OX=36329 GN=PF3D7_0619400 PE=4 SV=1	37C	1	1.0095	1	1.01955	1.01171	1.00122	1.01997	1.00258	0.990004	0.959044	40	265	2	69.1165	0.826386	-1.93096
Q8I492	Mature parasite-infected erythrocyte surface antigen OS=Plasmodium falciparum (isolate 3D7) OX=36329 GN=PF3D7_0500800 PE=4 SV=1	37C	1	1.02376	1.02674	1.03955	1.02549	1.02183	1.02825	1.0263	1.06139	1.05145	56	240	2	0.102806	0.62012	0.143935
O77361	TVN-junction protein 1 OS=Plasmodium falciparum (isolate 3D7) OX=36329 GN=PF3D7_0310400 PE=4 SV=1	37C	1	1.00045	0.996378	0.995553	0.994291	1.00421	0.986119	0.994911	1.00807	0.976542	44	272	2	209.992	0.556014	-4.9303
Q8IKK7	Glyceraldehyde-3-phosphate dehydrogenase OS=Plasmodium falciparum (isolate 3D7) OX=36329 GN=PF3D7_1462800 PE=3 SV=1	37C	1	0.969379	1.00077	0.971991	0.984867	0.97287	0.965732	0.977843	0.964043	0.960684	24	731	2	0.800429	0.544075	-0.150461
Q8I3M5	Karyopherin beta OS=Plasmodium falciparum (isolate 3D7) OX=36329 GN=PF3D7_0524000 PE=4 SV=1	37C	1	1.01359	1.01851	1.03163	1.00844	1.00366	0.993996	0.964249	0.935069	0.874708	44	192	2	30.9993	0.956417	-0.843892
Q8I4R5	Rhoptry neck protein 3 OS=Plasmodium falciparum (isolate 3D7) OX=36329 GN=PF3D7_1252100 PE=4 SV=1	37C	1	1.03724	1.03242	1.03742	1.04527	1.01941	1.03697	1.03002	1.06939	1.05938	75	211	2	0.0452185	0.590621	0.111796
Q8IKW5	Elongation factor 2 OS=Plasmodium falciparum (isolate 3D7) OX=36329 GN=PF3D7_1451100 PE=3 SV=1	37C	1	0.978074	0.996821	0.992374	0.973741	0.997525	0.982348	1.00758	0.990938	0.981659	36	348	2	2.16867	0.103123	0.000163304
Q8ILP3	Surface protein P113 OS=Plasmodium falciparum (isolate 3D7) OX=36329 GN=P113 PE=1 SV=1	37C	1	1.07318	1.03896	1.06716	1.05697	1.00334	1.0243	0.977573	0.959139	0.916803	42	154	2	10.6022	0.782823	-0.772501
C6KTA4	Pyruvate kinase OS=Plasmodium falciparum (isolate 3D7) OX=36329 GN=PF3D7_0626800 PE=1 SV=1	37C	1	0.9668	0.972919	0.953231	0.97162	0.96473	0.965842	0.966789	0.969404	0.944538	26	446	2	0.0126571	0.685331	-0.0570865
Q8IJN9	Heat shock protein 60 OS=Plasmodium falciparum (isolate 3D7) OX=36329 GN=PF3D7_1015600 PE=3 SV=1	37C	1	1.01715	1.02142	1.02183	1.02086	1.00379	1.0328	1.02828	1.05051	1.02555	34	247	2	0.214784	0.495194	0.165139
Q8IC35	Erythrocyte membrane-associated antigen OS=Plasmodium falciparum (isolate 3D7) OX=36329 GN=PF3D7_0703500 PE=3 SV=2	37C	1	0.994287	0.989904	0.988823	0.991714	0.986367	0.982634	0.990409	0.985998	0.974848	57	159	2	0.270332	0.707609	-0.188664
Q8IAL6	Mannose-6-phosphate isomerase OS=Plasmodium falciparum (isolate 3D7) OX=36329 GN=PF3D7_0801800 PE=3 SV=1	37C	1	0.986095	0.999105	0.98545	0.977896	1.00509	0.972981	1.00119	1.05362	1.00807	50	203	2	15.013	0.579841	4.83332
Q8IIR7	Endoplasmic reticulum-resident calcium binding protein OS=Plasmodium falciparum (isolate 3D7) OX=36329 GN=PF3D7_1108600 PE=4 SV=1	37C	1	0.964911	0.981311	0.976512	0.970382	0.984317	0.966342	1.0037	1.00772	1.04558	27	387	2	56.8487	0.78117	1.07233
Q8IDZ9	Isoleucyl-tRNA synthetase OS=Plasmodium falciparum (isolate 3D7) OX=36329 GN=PF3D7_1332900 PE=3 SV=1	37C	1	0.993975	0.998542	1.00872	0.999612	0.998033	0.976241	0.949219	0.929272	0.894193	49	268	2	27.2458	0.980409	-0.720357
Q8IJ77	S-adenosylmethionine decarboxylase/ornithine decarboxylase OS=Plasmodium falciparum (isolate 3D7) OX=36329 GN=PF3D7_1033100 PE=3 SV=1	37C	1	0.99657	0.995799	0.988056	0.987209	0.996235	0.971539	0.957193	0.954061	0.919804	59	187	2	25.0638	0.935899	-0.587451
Q8ILZ1	Rhoptry-associated protein 1 OS=Plasmodium falciparum (isolate 3D7) OX=36329 GN=PF3D7_1410400 PE=4 SV=1	37C	1	1.0894	1.05653	1.09672	1.08591	1.02626	1.07884	1.05429	1.07611	1.04851	35	185	2	343.416	0.494015	-0.000207063
Q8I3Y8	Inositol-3-phosphate synthase OS=Plasmodium falciparum (isolate 3D7) OX=36329 GN=PF3D7_0511800 PE=3 SV=1	37C	1	0.987267	0.990085	0.992937	0.979782	0.989735	0.977388	0.985922	0.994916	0.97316	34	347	2	0.0867591	0.386466	-0.109186
O77375	DNA-directed RNA polymerase subunit OS=Plasmodium falciparum (isolate 3D7) OX=36329 GN=PF3D7_0318200 PE=3 SV=1	37C	1	1.01292	1.02179	1.01674	1.01788	1.00563	1.00321	0.982738	0.988923	0.967298	68	153	2	6.28681	0.814952	-0.935569
C0H4M0	Rhoptry-associated membrane antigen OS=Plasmodium falciparum (isolate 3D7) OX=36329 GN=PF3D7_0707300 PE=4 SV=1	37C	1	1.00442	0.988499	0.987128	0.99991	0.999788	0.959327	0.981245	1.02077	1.00627	34	205	2	0.102681	0.0122112	8.85798e-05
Q6LFH8	Ornithine aminotransferase OS=Plasmodium falciparum (isolate 3D7) OX=36329 GN=OAT PE=1 SV=1	37C	1	0.965382	0.996744	0.964166	0.971499	0.981401	0.939064	0.924514	0.896008	0.835067	25	503	2	61.9163	0.930965	-0.576872
C6KSP3	GYF domain-containing protein OS=Plasmodium falciparum (isolate 3D7) OX=36329 GN=PF3D7_0604500 PE=4 SV=1	37C	1	0.978367	0.995183	0.983078	0.981405	1.0036	0.991946	1.02373	1.01966	1.01812	71	155	2	4.97308	0.762993	5.37812
Q8IL32	Heat shock protein 90, putative OS=Plasmodium falciparum (isolate 3D7) OX=36329 GN=PF3D7_1443900 PE=1 SV=1	37C	1	0.993225	1.01855	1.01437	0.983187	1.01269	1.0024	1.02031	1.00816	1.05145	42	148	2	10.7768	0.427631	0.865206
C0H571	High molecular weight rhoptry protein 2 OS=Plasmodium falciparum (isolate 3D7) OX=36329 GN=PF3D7_0929400 PE=4 SV=1	37C	1	1.04449	1.04072	1.04188	1.04683	0.995695	1.01922	0.963611	0.978631	0.93278	44	147	2	9.4773	0.75166	-0.728531
Q8IJ60	Methionine--tRNA ligase OS=Plasmodium falciparum (isolate 3D7) OX=36329 GN=PF3D7_1034900 PE=3 SV=1	37C	1	0.984104	0.988817	1.00201	0.976101	0.99289	0.986584	0.997047	1.01012	1.01261	41	185	2	15.1588	0.588428	3.54551
Q8IB94	HECT-like E3 ubiquitin ligase, putative OS=Plasmodium falciparum (isolate 3D7) OX=36329 GN=PF3D7_0826100 PE=4 SV=1	37C	1	1.04324	1.0443	1.02129	1.04366	1.00538	1.02167	0.978142	0.956839	0.987698	92	134	2	6.29347	0.687141	-2.8139
A0A143ZYL5	Uncharacterized protein OS=Plasmodium falciparum (isolate 3D7) OX=36329 GN=PF3D7_1036900 PE=4 SV=1	37C	1	1.00784	1.00644	0.997271	1.00741	1.02073	1.00479	1.02049	1.0271	1.02555	43	153	2	1.25171	0.677979	0.504831
Q8I3J5	DNA replication licensing factor MCM3 OS=Plasmodium falciparum (isolate 3D7) OX=36329 GN=PF3D7_0527000 PE=3 SV=1	37C	1	0.989521	1.01367	1.01528	0.995261	1.00533	0.999226	1.00826	0.988434	0.985965	45	135	2	3.25558	0.212445	-0.721735
C0H4V6	14-3-3 protein I OS=Plasmodium falciparum (isolate 3D7) OX=36329 GN=14-3-3I PE=1 SV=1	37C	1	0.968943	0.97547	0.977081	0.96552	0.985442	0.956301	0.937999	0.919547	0.878125	19	294	2	18.692	0.903805	-0.826919
Q8IIA4	Threonyl-tRNA synthetase OS=Plasmodium falciparum (isolate 3D7) OX=36329 GN=PF3D7_1126000 PE=3 SV=1	37C	1	0.994331	1.00809	0.997099	0.977228	1.00581	0.990679	1.01179	1.01423	0.97316	40	190	2	1259.68	0.361496	-2.71206
A0A144A2H0	Aminopeptidase P OS=Plasmodium falciparum (isolate 3D7) OX=36329 GN=PF3D7_1454400 PE=3 SV=1	37C	1	0.956282	0.957706	0.950643	0.89455	0.998728	0.983719	1.13829	1.28742	1.55895	39	233	2	97.2122	0.976029	0.794948
C6KT76	Phosphotransferase OS=Plasmodium falciparum (isolate 3D7) OX=36329 GN=PF3D7_0624000 PE=3 SV=1	37C	1	0.991028	0.996937	0.993858	0.986283	0.986278	0.979142	0.95631	0.946113	0.885039	24	199	2	84.3782	0.961315	-0.746701
Q8IBS3	Seryl-tRNA synthetase OS=Plasmodium falciparum (isolate 3D7) OX=36329 GN=PF3D7_0717700 PE=4 SV=1	37C	1	1.01178	1.00676	1.01745	1.00914	1.02082	0.979252	0.975026	0.930905	0.8992	35	168	2	29.5445	0.952897	-0.87995
Q8IKE8	Zinc finger protein, putative OS=Plasmodium falciparum (isolate 3D7) OX=36329 GN=PF3D7_1468900 PE=4 SV=1	37C	1	1.00123	1.00796	1.00805	0.989501	1.00394	1.00375	1.02317	1.03173	1.03119	42	131	2	6.69933	0.861461	2.3511
Q7K6A4	S-adenosylmethionine synthase OS=Plasmodium falciparum (isolate 3D7) OX=36329 GN=PF3D7_0922200 PE=3 SV=1	37C	1	0.985382	0.980064	0.985958	0.99219	1.00031	0.983164	1.0086	0.978755	1.0293	25	273	2	243.855	0.610024	4.84828
Q8I2W4	Gamma-ECS OS=Plasmodium falciparum (isolate 3D7) OX=36329 GN=PF3D7_0918900 PE=3 SV=1	37C	1	0.981629	0.998393	0.976556	0.979083	0.980308	0.970498	0.963006	0.964793	0.93823	42	121	2	4.61659	0.813506	-0.286571
Q8IDQ9	Phosphoethanolamine N-methyltransferase OS=Plasmodium falciparum (isolate 3D7) OX=36329 GN=PF3D7_1343000 PE=4 SV=1	37C	1	0.945524	0.971254	0.958009	0.947741	0.97453	0.950549	0.987536	0.977757	0.964807	14	389	2	6.27203	0.113112	5.29087
Q8IAK9	PRESAN domain-containing protein OS=Plasmodium falciparum (isolate 3D7) OX=36329 GN=PF3D7_0801000 PE=4 SV=1	37C	1	0.996781	0.991931	0.989249	0.998367	1.00012	0.980705	0.992596	1.02142	1.02089	31	96	2	19.7692	0.79677	8.49654
C6KT35	Acyl-CoA synthetase OS=Plasmodium falciparum (isolate 3D7) OX=36329 GN=PF3D7_0619500 PE=4 SV=1	37C	1	0.994934	0.986988	0.99202	0.985378	0.98866	0.971	0.923721	0.912585	0.835067	45	152	2	148.49	0.971875	-0.58115
A0A144A2G5	Dipeptidyl aminopeptidase 1 OS=Plasmodium falciparum (isolate 3D7) OX=36329 GN=PF3D7_1116700 PE=3 SV=1	37C	1	0.980806	0.987586	0.984363	0.980829	0.983294	0.974379	0.944388	0.942647	0.898481	29	154	2	25.8669	0.926243	-0.71629
Q8IAV6	Proteasome activator complex subunit 4, putative OS=Plasmodium falciparum (isolate 3D7) OX=36329 GN=PF3D7_0812100 PE=4 SV=1	37C	1	1.01728	1.00192	1.009	1.01913	0.988951	1.00209	0.982711	1.00594	0.978242	58	127	2	0.465257	0.441597	-2.79893
Q8IL22	Histidine--tRNA ligase OS=Plasmodium falciparum (isolate 3D7) OX=36329 GN=PF3D7_1445100 PE=4 SV=1	37C	1	0.995157	1.00021	1.00803	0.998807	1.02088	1.01199	1.05527	1.07187	1.05047	51	165	2	5.76465	0.904248	2.57922
Q8I5F9	Ubiquitin-activating enzyme E1 OS=Plasmodium falciparum (isolate 3D7) OX=36329 GN=PF3D7_1225800 PE=3 SV=1	37C	1	0.989991	0.99612	1.00444	0.975167	0.996969	0.979221	0.985408	0.956409	0.916803	39	128	2	70.521	0.891242	-1.25707
Q8I2I8	Importin alpha re-exporter, putative OS=Plasmodium falciparum (isolate 3D7) OX=36329 GN=PF3D7_0932800 PE=4 SV=1	37C	1	1.00095	0.992441	0.996251	0.997132	1.0065	1.00078	1.00384	1.02071	0.996454	38	140	2	1.37717	0.278624	0.838113
C0H4Y6	Protein disulfide-isomerase OS=Plasmodium falciparum (isolate 3D7) OX=36329 GN=PF3D7_0827900 PE=3 SV=1	37C	1	0.960944	0.99453	0.982044	0.974511	0.988541	0.990354	1.03375	1.04347	1.10196	22	307	2	66.4731	0.906644	0.745843
C0H5I7	T-complex protein 1 subunit delta OS=Plasmodium falciparum (isolate 3D7) OX=36329 GN=PF3D7_1357800 PE=3 SV=1	37C	1	1.01164	1.02504	1.02041	1.01252	1.0062	1.02347	1.02671	1.02487	1.01627	27	133	2	0.000213992	0.458872	0.181351
A0A144A2J9	Hsp70/Hsp90 organizing protein OS=Plasmodium falciparum (isolate 3D7) OX=36329 GN=PF3D7_1434300 PE=4 SV=1	37C	1	0.979067	0.997418	1.00163	0.994182	1.00345	0.994851	1.00955	1.05223	1.04753	37	216	2	11.1171	0.862982	1.98064
Q8IBF2	EMP1-trafficking protein OS=Plasmodium falciparum (isolate 3D7) OX=36329 GN=PF3D7_0730900 PE=4 SV=1	37C	1	0.989727	0.978391	0.989786	0.982304	0.990202	0.993148	1.00592	1.0095	1.00898	55	128	2	5.23578	0.739281	2.01917
Q8I3L4	Acyl-CoA synthetase OS=Plasmodium falciparum (isolate 3D7) OX=36329 GN=PF3D7_0525100 PE=4 SV=1	37C	1	1.00244	1.0049	1.021	0.9864	1.00977	0.985838	0.988762	0.956148	0.918301	25	156	2	49.9822	0.893937	-1.08326
A0A144A026	Merozoite surface protein 9 OS=Plasmodium falciparum (isolate 3D7) OX=36329 GN=PF3D7_1228600 PE=4 SV=1	37C	1	1.05839	1.04224	1.06831	1.05821	1.02265	1.03173	1.00305	0.989471	1.00898	34	130	2	3.54286	0.493977	-1.34851
Q76NM6	V-type proton ATPase catalytic subunit A OS=Plasmodium falciparum (isolate 3D7) OX=36329 GN=vapA PE=1 SV=1	37C	1	0.981438	1.00844	1.00685	0.986098	1.0038	0.990891	0.97086	0.925724	0.831976	24	139	2	131.348	0.974659	-1.01098
Q8IC16	DNA helicase OS=Plasmodium falciparum (isolate 3D7) OX=36329 GN=PF3D7_0705400 PE=3 SV=1	37C	1	1.00869	1.01355	1.01675	1.01237	0.991963	1.00784	0.97762	0.978448	0.95335	40	99	2	12.8043	0.82992	-0.8264
Q8I566	Serine hydroxymethyltransferase OS=Plasmodium falciparum (isolate 3D7) OX=36329 GN=SHMT PE=1 SV=1	37C	1	0.987096	1.00383	1.00398	0.994311	1.01871	0.99318	1.00222	1.00108	0.978242	29	166	2	1.64716	0.0544133	-0.544491
O97247	CCT-beta OS=Plasmodium falciparum (isolate 3D7) OX=36329 GN=PF3D7_0306800 PE=3 SV=4	37C	1	1.01994	1.02545	1.03483	1.02982	1.02812	1.02247	1.0569	1.04546	1.08809	29	136	2	0.674385	0.686587	0.221196
Q8ID31	Alanine--tRNA ligase OS=Plasmodium falciparum (isolate 3D7) OX=36329 GN=PF3D7_1367700 PE=3 SV=1	37C	1	0.995634	1.00351	1.01476	0.992732	1.00982	0.998173	1.01637	1.01719	0.992056	46	182	2	1.07549	0.03802	0.0785472
Q7KQL9	Fructose-bisphosphate aldolase OS=Plasmodium falciparum (isolate 3D7) OX=36329 GN=FBPA PE=1 SV=1	37C	1	0.939373	1.00786	0.944345	0.965836	0.941741	0.952081	0.93809	0.963779	0.944538	18	307	2	0.00458384	0.37059	-0.105561
Q8I586	Asparagine and aspartate rich protein 1 OS=Plasmodium falciparum (isolate 3D7) OX=36329 GN=PF3D7_1233600 PE=4 SV=1	37C	1	1.03627	1.02608	1.01395	1.02377	0.998447	1.00881	0.974627	0.967155	0.946925	76	102	2	9.26178	0.846754	-0.798233
Q8IJ56	Glutamate-rich protein GLURP OS=Plasmodium falciparum (isolate 3D7) OX=36329 GN=PF3D7_1035300 PE=4 SV=1	37C	1	0.990826	0.998578	1.00645	0.998577	0.982444	0.995193	0.986652	0.995463	1.03499	29	70	2	132.59	0.772177	3.91915
C6KT82	SNF2 helicase, putative OS=Plasmodium falciparum (isolate 3D7) OX=36329 GN=PF3D7_0624600 PE=4 SV=1	37C	1	1.00413	1.01251	1.00337	1.00022	1.01	0.997343	1.01567	1.01599	1.02461	61	125	2	4.70337	0.533864	0.80454
Q8I0V3	60 kDa chaperonin OS=Plasmodium falciparum (isolate 3D7) OX=36329 GN=PF3D7_1232100 PE=1 SV=2	37C	1	1.02657	1.03436	1.04164	1.03979	1.00063	1.04532	1.00877	1.0504	1.04364	27	91	2	0.0122933	0.300439	0.0439594
Q8IKH3	26S proteasome regulatory subunit RPN2, putative OS=Plasmodium falciparum (isolate 3D7) OX=36329 GN=PF3D7_1466300 PE=3 SV=1	37C	1	1.04123	1.03721	1.04741	1.03448	1.00253	1.03593	1.00227	1.01282	0.977391	34	109	2	4.19694	0.40504	-0.748385
Q8I531	AP2 domain transcription factor, putative OS=Plasmodium falciparum (isolate 3D7) OX=36329 GN=PF3D7_1239200 PE=4 SV=1	37C	1	0.995544	0.999673	1.00111	1.00399	1.0121	1.02158	1.02698	1.01302	1.03404	57	107	2	0.693703	0.841344	0.985691
Q8IDF0	DNA replication licensing factor MCM6 OS=Plasmodium falciparum (isolate 3D7) OX=36329 GN=PF3D7_1355100 PE=3 SV=1	37C	1	1.03223	1.0152	1.02749	1.02126	1.00311	1.01554	1.00294	1.00332	0.967298	41	92	2	14.7904	0.583134	-0.793847
Q9TY96	Serine-repeat antigen protein 6 OS=Plasmodium falciparum (isolate 3D7) OX=36329 GN=SERA6 PE=1 SV=3	37C	1	1.04051	1.02626	1.03401	1.02698	0.999214	0.996804	0.975758	0.974092	0.944538	40	128	2	9.13798	0.833047	-0.6266
Q8I1U8	Ubiquitin carboxyl-terminal hydrolase OS=Plasmodium falciparum (isolate 3D7) OX=36329 GN=PF3D7_0413900 PE=3 SV=1	37C	1	1.00098	0.986378	0.995503	0.982392	1.0118	0.983752	0.980096	0.944296	0.90865	31	94	2	45.6455	0.922251	-1.24365
Q8IKF6	Kelch domain-containing protein, putative OS=Plasmodium falciparum (isolate 3D7) OX=36329 GN=PF3D7_1468100 PE=4 SV=1	37C	1	1.01361	1.05352	1.02102	1.05472	1.01259	1.02074	1.00473	0.972118	0.997338	50	98	2	7.3832	0.463608	-1.62284
Q8ID39	Uncharacterized protein MAL13P1.336 OS=Plasmodium falciparum (isolate 3D7) OX=36329 GN=MAL13P1.336 PE=1 SV=1	37C	1	0.972116	1.00451	0.976046	0.97964	0.987618	0.986551	1.00853	1.03216	1.01353	31	132	2	11.4216	0.678337	3.85847
A0A5K1K967	Elongation factor 1-gamma, putative OS=Plasmodium falciparum (isolate 3D7) OX=36329 GN=PF3D7_1338300 PE=4 SV=1	37C	1	0.992814	1.00117	1.00648	0.998876	1.0039	0.998968	1.00006	1.00587	0.996454	24	180	2	0.118246	0.0235317	0.214455
A0A143ZYR6	Uncharacterized protein OS=Plasmodium falciparum (isolate 3D7) OX=36329 GN=PF3D7_1120000 PE=4 SV=1	37C	1	0.972823	0.988244	0.986561	0.975171	0.995631	0.989165	1.00923	1.0338	1.01812	49	100	2	11.5403	0.781428	3.95606
C0H4L6	Uncharacterized protein OS=Plasmodium falciparum (isolate 3D7) OX=36329 GN=PF3D7_0706500 PE=4 SV=1	37C	1	1.0216	1.03093	1.01776	1.0313	1.00813	1.02597	0.994983	0.990989	0.916803	51	111	2	124.363	0.885277	-1.36922
C0H551	Glutamine synthetase, putative OS=Plasmodium falciparum (isolate 3D7) OX=36329 GN=PF3D7_0922600 PE=3 SV=1	37C	1	1.02849	1.00716	1.0153	1.01368	1.018	0.995155	0.98225	0.988475	0.942163	27	135	2	15.5716	0.77487	-0.771973
Q8I0P6	Elongation factor 1-alpha OS=Plasmodium falciparum (isolate 3D7) OX=36329 GN=PF3D7_1357000 PE=3 SV=1	37C	1	0.986681	1.01996	1.00572	1.00456	1.00537	1.0142	1.01117	1.01763	1.01812	26	328	2	0.0713706	0.388198	0.373227
Q8IJG6	Chromodomain-helicase-DNA-binding protein 1 homolog, putative OS=Plasmodium falciparum (isolate 3D7) OX=36329 GN=PF3D7_1023900 PE=4 SV=1	37C	1	1.00262	0.991622	1.00684	1.00427	0.998001	1.00609	1.00715	1.01097	1.00447	50	90	2	0.296862	0.332677	0.531135
O96153	26S proteasome regulatory subunit RPN1, putative OS=Plasmodium falciparum (isolate 3D7) OX=36329 GN=PF3D7_0205900 PE=3 SV=3	37C	1	1.04741	1.03351	1.04789	1.03946	1.00336	1.03639	0.980095	0.983244	0.946128	34	129	2	17.8702	0.718674	-0.86073
Q8I395	High molecular weight rhoptry protein 3 OS=Plasmodium falciparum (isolate 3D7) OX=36329 GN=PF3D7_0905400 PE=4 SV=1	37C	1	1.03088	1.01705	1.02746	1.02009	1.01023	1.01889	1.02718	1.04886	1.00447	30	93	2	0.0663584	0.259279	1.08783e-05
Q8ILA1	Translocon component PTEX150 OS=Plasmodium falciparum (isolate 3D7) OX=36329 GN=PF3D7_1436300 PE=1 SV=1	37C	1	1.03963	1.03195	1.04083	1.05367	1.00488	1.03569	1.01623	1.01209	1.03309	32	88	2	22.4276	2.72666e-05	-0.208005
Q8IJS7	PRE-binding protein OS=Plasmodium falciparum (isolate 3D7) OX=36329 GN=PF3D7_1011800 PE=4 SV=1	37C	1	0.998339	1.02679	1.03301	1.00129	1.02023	1.00085	1.03284	1.03553	1.03499	40	124	2	0.372665	0.348701	0.199375
Q8IAM0	Glutamate dehydrogenase, putative OS=Plasmodium falciparum (isolate 3D7) OX=36329 GN=PF3D7_0802000 PE=3 SV=1	37C	1	0.994498	1.00117	1.00081	0.994007	0.98063	0.982167	0.916115	0.905296	0.824652	41	117	2	131.703	0.968139	-0.573301
Q76NM3	L-lactate dehydrogenase OS=Plasmodium falciparum (isolate 3D7) OX=36329 GN=PF3D7_1324900 PE=1 SV=1	37C	1	0.953764	0.975378	0.919208	0.963252	0.937425	0.94212	0.93567	0.960932	0.911598	13	325	2	0.042619	0.54632	-0.0994119
C6KSV3	Transketolase OS=Plasmodium falciparum (isolate 3D7) OX=36329 GN=PF3D7_0610800 PE=3 SV=1	37C	1	0.968185	0.994735	0.986541	0.967703	0.971062	0.971531	0.981333	0.984864	0.983377	25	124	2	2531.65	0.357179	0.00017431
Q8ILR7	DNA replication licensing factor MCM2 OS=Plasmodium falciparum (isolate 3D7) OX=36329 GN=PF3D7_1417800 PE=3 SV=1	37C	1	1.02989	1.02543	1.03375	1.03461	1.01256	1.00713	1.0152	1.00983	0.996454	42	91	2	0.702208	0.398983	-2.3443
Q8ILP6	Diadenosine tetraphosphate synthetase OS=Plasmodium falciparum (isolate 3D7) OX=36329 GN=PF3D7_1420400 PE=3 SV=2	37C	1	1.0007	0.993761	0.997585	0.992059	1.00269	0.999957	0.967428	0.975629	0.922067	35	142	2	154.396	0.889875	-0.897426
Q8ILA4	Glucose-6-phosphate isomerase OS=Plasmodium falciparum (isolate 3D7) OX=36329 GN=PF3D7_1436000 PE=1 SV=1	37C	1	0.971415	0.992143	0.985472	0.984069	1.00336	0.972936	1.00113	1.01751	1.00898	24	162	2	12.5336	0.541249	4.51058
Q8I5L6	Clathrin heavy chain OS=Plasmodium falciparum (isolate 3D7) OX=36329 GN=PF3D7_1219100 PE=3 SV=1	37C	1	1.20154	1.19479	1.29502	1.2199	1.13132	1.14954	1.10189	1.1244	1.25868	48	85	2	565.97	0.480138	-5.72502e-05
Q8I2G1	Ring-exported protein 1 OS=Plasmodium falciparum (isolate 3D7) OX=36329 GN=PF3D7_0935900 PE=4 SV=1	37C	1	1.06413	1.05381	1.0767	1.05861	1.01585	1.03363	1.01426	1.04618	1.01444	33	112	2	0.457288	0.220919	-1.56896
P50250	Adenosylhomocysteinase OS=Plasmodium falciparum (isolate 3D7) OX=36329 GN=PFE1050w PE=1 SV=2	37C	1	0.978105	1.00812	1.01415	0.986413	1.00109	0.991561	0.976183	0.931698	0.922067	20	212	2	19.9583	0.893425	-1.89748
A0A143ZZK9	Non-SERCA-type Ca2+ -transporting P-ATPase OS=Plasmodium falciparum (isolate 3D7) OX=36329 GN=PF3D7_1211900 PE=4 SV=1	37C	1	1.22315	1.14725	1.22216	1.21732	1.06604	1.12445	1.02572	1.04156	1.06641	40	74	2	1.5137	0.321841	-1.29388
Q8ILZ3	CTP synthase OS=Plasmodium falciparum (isolate 3D7) OX=36329 GN=PF3D7_1410200 PE=3 SV=1	37C	1	1.00749	0.996036	1.02082	1.0149	1.01197	0.992235	0.984424	1.00866	0.979948	35	106	2	1.97304	0.432469	-3.23136
Q8II43	CCT-alpha OS=Plasmodium falciparum (isolate 3D7) OX=36329 GN=PF3D7_1132200 PE=3 SV=1	37C	1	1.01441	1.02115	1.0221	1.03292	1.00352	1.01792	1.00553	1.01387	1.01536	25	131	2	11.3247	0.276338	-4.35363e-05
A0A144A431	Leucine-rich repeat protein OS=Plasmodium falciparum (isolate 3D7) OX=36329 GN=PF3D7_1427900 PE=4 SV=1	37C	1	0.97588	0.991713	0.985166	0.975054	0.996802	0.973609	1.0074	1.05208	1.03309	16	204	2	13.7617	0.850898	5.04626
A0A144A0G8	Prolyl-tRNA synthetase OS=Plasmodium falciparum (isolate 3D7) OX=36329 GN=PF3D7_1213800 PE=3 SV=1	37C	1	0.985807	1.02106	1.00574	1.00121	0.993395	1.00308	0.966889	0.940531	0.895618	32	137	2	46.7153	0.932636	-0.963546
O96198	Asparagine--tRNA ligase OS=Plasmodium falciparum (isolate 3D7) OX=36329 GN=PF3D7_0211800 PE=3 SV=1	37C	1	0.987924	0.990272	0.999245	0.968196	1.00421	0.990421	1.02416	1.03361	1.00807	21	124	2	6.04474	0.621364	6.67876
Q8ILL5	NTF2 domain-containing protein OS=Plasmodium falciparum (isolate 3D7) OX=36329 GN=PF3D7_1423700 PE=4 SV=1	37C	1	1.03103	1.00509	1.00746	1.03929	1.02749	1.01234	1.02953	1.03886	1.01812	41	110	2		0.00276972	-1.19379e-05
Q8IIF6	Uncharacterized protein OS=Plasmodium falciparum (isolate 3D7) OX=36329 GN=PF3D7_1121100 PE=4 SV=2	37C	1	0.99698	1.01093	0.994602	0.983187	0.990581	0.999541	0.975758	0.992018	0.97316	53	93	2	1.09287	0.455007	-0.384218
A0A144A6N0	Glucose-6-phosphate dehydrogenase-6-phosphogluconolactonase OS=Plasmodium falciparum (isolate 3D7) OX=36329 GN=PF3D7_1453800 PE=3 SV=1	37C	1	1.0081	0.995622	0.9965	0.993721	1.00322	0.989655	1.00053	1.04693	1.00357	33	121	2	15.9188	0.34975	1.24679
Q8I719	cGMP-dependent protein kinase OS=Plasmodium falciparum (isolate 3D7) OX=36329 GN=PKG PE=1 SV=1	37C	1	1.00433	0.987293	1.00218	0.997399	0.998647	0.995616	0.996449	0.996124	0.955782	33	91	2	91.1122	0.895033	-5.39191
Q8I2U5	Inosine-5'-monophosphate dehydrogenase OS=Plasmodium falciparum (isolate 3D7) OX=36329 GN=PF3D7_0920800 PE=3 SV=1	37C	1	1.01666	0.996504	1.01626	1.01168	0.997499	0.997096	0.979588	0.96385	0.904992	23	112	2	110.232	0.942686	-0.868478
Q8I447	DNA mismatch repair protein OS=Plasmodium falciparum (isolate 3D7) OX=36329 GN=PF3D7_0505500 PE=3 SV=1	37C	1	1.00233	1.00791	1.00795	0.995315	0.997937	0.996532	0.990001	0.973449	0.924342	41	108	2	129.068	0.970476	-1.14596
Q8IBL5	Uncharacterized protein OS=Plasmodium falciparum (isolate 3D7) OX=36329 GN=PF3D7_0723800 PE=4 SV=1	37C	1	1.00053	0.98706	0.993323	0.99067	1.01144	0.997173	1.02256	1.02755	1.06946	52	100	2	43.7996	0.888306	0.889156
Q8I320	Elongation factor 1-beta OS=Plasmodium falciparum (isolate 3D7) OX=36329 GN=PF3D7_0913200 PE=3 SV=1	37C	1	0.978676	0.989397	0.982446	0.982322	0.981343	0.976658	0.983696	1.01459	0.988566	15	137	2	19.7646	0.380319	3.80674
Q6ZMA8	Vacuolar proton pump subunit B OS=Plasmodium falciparum (isolate 3D7) OX=36329 GN=PF3D7_0406100 PE=3 SV=1	37C	1	0.99797	0.984602	0.991574	0.979114	0.98676	0.981917	0.969972	0.941886	0.931234	21	90	2	20.1477	0.931972	-1.04895
Q8IDJ8	Lysine--tRNA ligase OS=Plasmodium falciparum (isolate 3D7) OX=36329 GN=PF3D7_1350100 PE=1 SV=1	37C	1	0.973495	0.989658	0.99633	0.976023	0.999292	1.00576	1.03127	1.0425	1.02368	26	132	2	3.58902	0.818556	1.76512
Q8I5C4	T-complex protein 1 subunit gamma OS=Plasmodium falciparum (isolate 3D7) OX=36329 GN=PF3D7_1229500 PE=3 SV=1	37C	1	0.998096	1.01678	1.03337	1.00667	0.98107	1.00576	0.955588	0.936455	0.925865	29	109	2	9.65751	0.855998	-2.59297
A0A5K1K8L5	Uncharacterized protein OS=Plasmodium falciparum (isolate 3D7) OX=36329 GN=PF3D7_0520800 PE=4 SV=1	37C	1	0.983211	0.989219	0.967523	0.987726	0.988774	0.979994	0.993327	1.02603	1.03786	49	84	2	26.4405	0.851303	2.31237
Q8IJR9	Glutamine amidotransferase OS=Plasmodium falciparum (isolate 3D7) OX=36329 GN=PF3D7_1012600 PE=1 SV=1	37C	1	0.994911	0.98521	0.995958	0.980171	0.990533	0.960676	0.933012	0.906045	0.861963	21	102	2	40.9821	0.981581	-0.611368
O96236	DNA-directed RNA polymerase subunit beta OS=Plasmodium falciparum (isolate 3D7) OX=36329 GN=PF3D7_0215700 PE=3 SV=3	37C	1	1.02085	1.01894	1.02494	1.01485	1.01637	1.0079	1.00614	1.0029	1.00537	44	93	2	2.79378	0.40599	-1.29054
Q8IJL2	Eukaryotic translation initiation factor 2A OS=Plasmodium falciparum (isolate 3D7) OX=36329 GN=PF3D7_1019000 PE=3 SV=1	37C	1	0.976519	0.994191	0.995269	0.982296	1.00094	1.00029	1.0218	1.0146	1.01812	47	83	2	2.41209	0.729587	1.34065
Q8I3Z1	MATH and LRR domain-containing protein PFE0570w OS=Plasmodium falciparum (isolate 3D7) OX=36329 GN=PFE0570w PE=1 SV=1	37C	1	1.00502	0.992596	1.00433	1.00857	1.00648	0.995281	0.976309	0.983162	0.967298	65	92	2	4.57142	0.835089	-2.67107
C6KST5	T-complex protein 1 subunit zeta OS=Plasmodium falciparum (isolate 3D7) OX=36329 GN=PF3D7_0608700 PE=3 SV=1	37C	1	1.02082	1.00816	1.01037	1.01125	0.998176	1.00753	0.985992	0.997916	0.972318	23	121	2	6.51638	0.637749	-0.680646
Q8IDE7	Protein-serine/threonine phosphatase OS=Plasmodium falciparum (isolate 3D7) OX=36329 GN=PF3D7_1355500 PE=3 SV=1	37C	1	0.999162	0.995439	1.00388	0.99712	0.997816	0.999896	0.996338	1.00399	0.995571	39	106	2	12.7063	0.015028	0.0252128
O77310	Cytoadherence linked asexual protein 3.1 OS=Plasmodium falciparum (isolate 3D7) OX=36329 GN=PF3D7_0302500 PE=4 SV=2	37C	1	1.04416	1.03611	1.04986	1.03921	1.02993	1.03902	1.05609	1.08175	1.06743	7	88	2	0.0471181	0.707145	0.13159
A0A144A0J9	Uncharacterized protein OS=Plasmodium falciparum (isolate 3D7) OX=36329 GN=PF3D7_1202600 PE=3 SV=1	37C	1	0.997441	0.993725	0.999302	0.977765	1.01476	0.985838	1.02211	1.02029	1.03309	38	85	2	9.32716	0.672457	5.78487
Q8IKA6	DnaJ protein, putative OS=Plasmodium falciparum (isolate 3D7) OX=36329 GN=PF3D7_1473200 PE=4 SV=1	37C	1	0.971273	0.968765	0.959358	0.973205	1.0078	0.98606	1.08565	1.15643	1.14112	18	81	2	10.6033	0.96018	3.1413
A0A144A3W0	Glutathione reductase OS=Plasmodium falciparum (isolate 3D7) OX=36329 GN=PF3D7_1419800.2 PE=3 SV=1	37C	1	1.00701	0.997177	1.00031	0.987342	1.0043	0.975883	0.969803	0.9874	0.950127	15	81	2	14.0304	0.689597	-0.44454
Q8I4U5	26S protease regulatory subunit 8, putative OS=Plasmodium falciparum (isolate 3D7) OX=36329 GN=PF3D7_1248900 PE=3 SV=1	37C	1	1.06734	1.04956	1.07299	1.0837	1.03425	1.0539	1.0345	1.04826	1.04461	17	107	2	388.723	0.532444	-0.000113069
C0H4Y0	Ubiquitin conjugation factor E4 B, putative OS=Plasmodium falciparum (isolate 3D7) OX=36329 GN=PF3D7_0826500 PE=3 SV=1	37C	1	0.974356	0.99911	0.981257	0.970632	0.977046	0.976907	0.969284	0.906417	0.897047	36	83	2	17.0594	0.919804	-5.17385
Q8IEE5	DNA helicase OS=Plasmodium falciparum (isolate 3D7) OX=36329 GN=PF3D7_1317100 PE=3 SV=1	37C	1	1.02999	1.02272	1.02333	1.01931	1.01207	1.03172	1.01655	1.01869	1.00717	36	79	2	1409.31	0.422276	-6.42793e-05
O97282	CCT-epsilon OS=Plasmodium falciparum (isolate 3D7) OX=36329 GN=PF3D7_0320300 PE=3 SV=1	37C	1	0.988396	1.01909	1.01995	0.989944	0.996352	1.01379	1.00214	0.978597	0.965636	22	112	2	39.9474	0.605979	-2.81878
A0A144A1R5	Actin I OS=Plasmodium falciparum (isolate 3D7) OX=36329 GN=PF3D7_1246200 PE=3 SV=1	37C	1	1.04112	1.00974	1.04003	1.03649	1.01874	1.03527	1.11893	1.12595	1.29642	17	121	2	44.9958	0.91137	0.95994
A0A143ZZC7	S-antigen protein OS=Plasmodium falciparum (isolate 3D7) OX=36329 GN=PF3D7_1035200 PE=4 SV=1	37C	1	1.03439	1.01887	1.00216	1.03332	1.00657	1.02926	1.00878	1.04086	1.06138	16	111	2	2.02821	0.342183	0.187081
Q8IJ37	Pyruvate kinase OS=Plasmodium falciparum (isolate 3D7) OX=36329 GN=PF3D7_1037100 PE=3 SV=1	37C	1	1.02883	1.01893	1.04093	1.02519	1.02645	1.0199	1.01234	1.00088	0.979948	30	84	2	13.2299	0.608359	-1.26592
Q8IDF6	Adenylosuccinate synthetase OS=Plasmodium falciparum (isolate 3D7) OX=36329 GN=Adss PE=3 SV=1	37C	1	0.979987	0.973793	0.976941	0.98246	0.986434	0.970515	0.939451	0.892197	0.830746	21	108	2	54.4303	0.98054	-0.911265
Q8IE10	Glutamine--tRNA ligase OS=Plasmodium falciparum (isolate 3D7) OX=36329 GN=PF3D7_1331700 PE=3 SV=1	37C	1	0.99572	0.992285	0.997665	0.994428	0.989936	0.99106	1.0081	1.00772	0.988566	32	93	2	8903.94	0.0306042	2.02272e-05
Q8IDZ8	20 kDa chaperonin OS=Plasmodium falciparum (isolate 3D7) OX=36329 GN=PF3D7_1333000 PE=3 SV=1	37C	1	0.99515	0.975565	0.981337	0.987454	1.00334	0.984375	0.987563	0.993633	0.975694	10	72	2		0.179569	6.45296e-05
O96164	Serine repeat antigen 4 OS=Plasmodium falciparum (isolate 3D7) OX=36329 GN=PF3D7_0207700 PE=1 SV=1	37C	1	1.03126	0.998846	1.01239	1.01126	1.00726	0.985319	0.97583	0.936056	0.891356	30	88	2	59.7531	0.948878	-0.741327
C0H4R8	Serine/threonine protein kinase, FIKK family OS=Plasmodium falciparum (isolate 3D7) OX=36329 GN=PF3D7_0805700 PE=4 SV=1	37C	1	1.00812	0.990128	0.989958	0.986442	1.01021	0.959075	0.967402	0.950341	0.930464	34	71	2	13.0295	0.817159	-0.619974
C6KT50	Pyridoxal 5'-phosphate synthase subunit Pdx1 OS=Plasmodium falciparum (isolate 3D7) OX=36329 GN=pdx1 PE=1 SV=1	37C	1	0.985181	1.00054	1.01841	1.00903	1.02271	1.03941	1.0797	1.07764	1.09445	18	107	2	3.4774	0.95172	0.653253
Q8IKP1	ATP-dependent RNA helicase DBP5 OS=Plasmodium falciparum (isolate 3D7) OX=36329 GN=PF3D7_1459000 PE=4 SV=1	37C	1	0.997153	0.991622	1.00684	0.98758	1.0111	1.01066	1.0205	1.02393	1.00447	29	95	2	0.664802	0.600034	2.05778
Q8IIK5	Rhoptry neck protein 4 OS=Plasmodium falciparum (isolate 3D7) OX=36329 GN=PF3D7_1116000 PE=4 SV=2	37C	1	1.0069	0.993369	0.99467	0.997553	1.00114	1.0001	1.01948	1.03007	1.02648	27	101	2	9.3395	0.921222	2.70345
Q8IKT2	6-phosphogluconate dehydrogenase, decarboxylating OS=Plasmodium falciparum (isolate 3D7) OX=36329 GN=PF3D7_1454700 PE=1 SV=1	37C	1	0.984472	0.989422	0.992293	0.981519	1.01019	0.987874	0.988482	1.00968	0.95335	18	122	2	364.152	0.624004	-4.53803
Q8IIB6	GrpE protein homolog OS=Plasmodium falciparum (isolate 3D7) OX=36329 GN=PF3D7_1124700 PE=3 SV=2	37C	1	0.984215	0.984107	0.998348	0.966829	0.985601	0.993891	1.00088	1.00624	0.984238	16	94	2	1.76876	0.190089	2.70041
O96127	Translation-enhancing factor OS=Plasmodium falciparum (isolate 3D7) OX=36329 GN=PF3D7_0202400 PE=4 SV=1	37C	1	1.00766	1.01932	1.02095	1.00959	1.00419	1.00167	1.00893	1.04335	1.04074	46	101	2	2.72052	0.36845	0.298566
Q8I2B1	Aspartyl-tRNA synthetase OS=Plasmodium falciparum (isolate 3D7) OX=36329 GN=PF3D7_0102900 PE=3 SV=1	37C	1	0.996358	1.01478	1.00418	0.986434	0.986728	1.01586	1.00466	1.0134	0.928159	25	95	2	308.919	0.818172	-2.48492
Q7KQK6	GTP-binding nuclear protein OS=Plasmodium falciparum (isolate 3D7) OX=36329 GN=PF3D7_1117700 PE=3 SV=1	37C	1	0.971502	0.985462	0.978537	0.970853	0.983174	0.975777	0.997425	0.985698	1.00717	15	167	2	7.72834	0.381453	3.85512
Q8IDK7	Glutamyl-tRNA synthetase OS=Plasmodium falciparum (isolate 3D7) OX=36329 GN=PF3D7_1349200 PE=3 SV=1	37C	1	0.994419	0.996511	1.01543	0.994609	1.00673	1.00426	1.00143	1.00698	1.00447	35	145	2	10.4485	0.116414	0.214515
Q7KQK0	cAMP-dependent protein kinase regulatory subunit OS=Plasmodium falciparum (isolate 3D7) OX=36329 GN=PF3D7_1223100 PE=1 SV=1	37C	1	0.987344	1.00857	0.989059	0.979132	1.03849	0.980206	1.10024	1.11566	1.15876	21	106	2	9.85666	0.907011	4.20932
Q8I259	Uncharacterized protein OS=Plasmodium falciparum (isolate 3D7) OX=36329 GN=PF3D7_0108300 PE=4 SV=2	37C	1	1.00734	0.999651	1.01391	1.00228	1.01671	0.995463	1.00601	0.98174	0.992056	39	87	2	7.84613	0.446085	-1.25598
Q8I3X4	Purine nucleoside phosphorylase OS=Plasmodium falciparum (isolate 3D7) OX=36329 GN=PNP PE=1 SV=1	37C	1	0.963708	0.972946	0.969229	0.970725	0.963424	0.932664	0.859604	0.787607	0.712294	14	145	2	29.4474	0.989604	-0.761329
Q8I6T2	Isocitrate dehydrogenase [NADP] OS=Plasmodium falciparum (isolate 3D7) OX=36329 GN=PF3D7_1345700 PE=3 SV=1	37C	1	0.962739	0.994221	0.99034	0.973855	0.99222	0.985494	1.00094	1.00881	0.969802	23	96	2	1.22852	0.053494	1.63589
O96220	T-complex protein 1 subunit theta OS=Plasmodium falciparum (isolate 3D7) OX=36329 GN=PF3D7_0214000 PE=3 SV=3	37C	1	1.02402	1.0287	1.04123	1.02248	0.99579	1.01119	0.968275	0.946214	0.898481	25	93	2	29.1169	0.910141	-0.790013
O77309	Cytoadherence linked asexual protein 3.2 OS=Plasmodium falciparum (isolate 3D7) OX=36329 GN=PF3D7_0302200 PE=4 SV=3	37C	1	1.00242	0.942922	1.03519	1.00808	1.00178	1.01606	1.02671	0.988558	1.01627	2	81	2	0.0276216	0.265915	2.60945
C6KTB1	Protein DJ-1 OS=Plasmodium falciparum (isolate 3D7) OX=36329 GN=PF3D7_0627500 PE=4 SV=1	37C	1	0.97172	0.97437	0.99092	0.969805	0.990344	0.961882	0.934213	0.868711	0.805158	11	109	2	46.0225	0.975275	-0.948393
C6KT55	Nascent polypeptide-associated complex subunit alpha, putative OS=Plasmodium falciparum (isolate 3D7) OX=36329 GN=PF3D7_0621800 PE=4 SV=1	37C	1	0.992167	1.0008	0.991097	0.973032	1.01925	0.985026	1.02715	1.05909	1.0554	11	81	2	11.3042	0.831549	2.93567
O97227	Dihydrolipoamide acetyltransferase component of pyruvate dehydrogenase complex OS=Plasmodium falciparum (isolate 3D7) OX=36329 GN=PF3D7_0303700 PE=3 SV=1	37C	1	1.00749	0.990312	0.988967	0.995187	1.00601	0.985989	0.983494	1.02325	0.979948	16	78	2	0.00532695	0.0747036	-2.43525
C0H4L1	Importin-7, putative OS=Plasmodium falciparum (isolate 3D7) OX=36329 GN=PF3D7_0706000 PE=4 SV=1	37C	1	1.04515	1.0402	1.04563	1.04591	1.00899	1.01286	0.958299	0.957295	0.896332	33	76	2	20.7771	0.873468	-0.728183
C0H5B1	Eukaryotic translation initation factor 4 gamma OS=Plasmodium falciparum (isolate 3D7) OX=36329 GN=PF3D7_1312900 PE=4 SV=1	37C	1	1.01994	1.00472	1.01139	1.02068	1.01249	1.02061	1.04341	1.04612	1.04558	38	93	2	0.967015	0.790685	0.453852
A0A5K1K8J0	RNA lariat debranching enzyme, putative OS=Plasmodium falciparum (isolate 3D7) OX=36329 GN=PF3D7_1340600 PE=4 SV=1	37C	1	0.991133	0.984874	0.975986	0.98844	0.999421	0.955495	0.949106	0.936812	0.858015	22	88	2	110.762	0.913846	-0.744594
P61074	Proliferating cell nuclear antigen OS=Plasmodium falciparum (isolate 3D7) OX=36329 GN=PCNA PE=3 SV=1	37C	1	0.972331	1	1.001	0.968183	1.00423	0.982123	1.00401	1.01651	1.00898	14	117	2	1.47728	0.252246	0.867326
Q8IL11	M17 leucyl aminopeptidase OS=Plasmodium falciparum (isolate 3D7) OX=36329 GN=PF3D7_1446200 PE=1 SV=1	37C	1	1.00695	0.971683	1.02578	0.883032	1.00773	1.00696	0.981168	0.98212	0.95416	19	98	2	1014.4	0.0464723	-0.11538
Q8I2P2	Glutamine-dependent NAD(+) synthetase, putative OS=Plasmodium falciparum (isolate 3D7) OX=36329 GN=PF3D7_0926700 PE=4 SV=1	37C	1	0.991422	1.00071	1.00558	0.99774	1.00035	0.991482	0.983857	0.992716	0.924342	24	96	2	96.8216	0.931743	-4.44653
A0A5K1K8Y8	DNA/RNA-binding protein Alba 4 OS=Plasmodium falciparum (isolate 3D7) OX=36329 GN=PF3D7_1347500 PE=4 SV=1	37C	1	0.982236	1.00821	1.00505	1.00276	1.01779	0.996303	1.03588	1.06913	1.0654	13	158	2	12.0057	0.904199	3.3553
A0A144A0U7	eIF-2B GDP-GTP exchange factor subunit epsilon OS=Plasmodium falciparum (isolate 3D7) OX=36329 GN=PF3D7_1213900 PE=3 SV=1	37C	1	0.991704	0.98873	0.978245	0.988135	0.96639	0.964221	0.96069	0.952802	0.942953	33	61	2	1.6502	0.941699	-0.315285
O97237	GRIP and coiled-coil domain-containing protein OS=Plasmodium falciparum (isolate 3D7) OX=36329 GN=PF3D7_0305200 PE=1 SV=3	37C	1	1.00507	0.997638	0.987692	0.995835	0.988777	0.988355	0.972959	0.981703	0.963979	38	68	2	5.33303	0.817713	-0.380618
Q8I3A0	Copper-transporting ATPase OS=Plasmodium falciparum (isolate 3D7) OX=36329 GN=PF3D7_0904900 PE=3 SV=2	37C	1	0.985127	0.992344	0.990574	0.999513	1.00769	0.989476	1.01899	1.05288	1.0369	42	102	2	12.8613	0.89058	4.00323
Q8IKJ1	Serine/threonine protein phosphatase UIS2, putative OS=Plasmodium falciparum (isolate 3D7) OX=36329 GN=PF3D7_1464600 PE=4 SV=2	37C	1	1.02553	1.02328	1.02809	1.02543	0.99848	1.03189	1.0126	1.00246	1.02742	37	59	2	1571.8	0.226929	-7.43952e-05
Q8I1R6	Bifunctional dihydrofolate reductase-thymidylate synthase OS=Plasmodium falciparum (isolate 3D7) OX=36329 GN=PF3D7_0417200 PE=3 SV=1	37C	1	0.983335	0.982732	0.981696	0.971157	0.989	0.966699	0.967127	0.957319	0.916803	24	126	2	9.67248	0.756787	-0.574694
Q8IJA9	Adenosine deaminase OS=Plasmodium falciparum (isolate 3D7) OX=36329 GN=ADA PE=1 SV=1	37C	1	0.965379	0.953622	0.944721	0.967069	0.955971	0.963418	0.982519	1.00207	0.969802	19	188	2	8.11138	0.272092	3.83905
Q8I4Y9	N-alpha-acetyltransferase 15, NatA auxiliary subunit, putative OS=Plasmodium falciparum (isolate 3D7) OX=36329 GN=PF3D7_1244100 PE=4 SV=1	37C	1	0.99786	1.00774	1.00613	1.00202	1.01447	0.996196	0.972152	0.979104	0.935887	42	107	2	65.2366	0.864612	-0.783551
Q8IIC9	Translation elongation factor EF-1, subunit alpha, putative OS=Plasmodium falciparum (isolate 3D7) OX=36329 GN=PF3D7_1123400 PE=4 SV=1	37C	1	0.989585	0.990085	0.998094	0.990711	1.00114	0.993005	0.992819	0.995175	0.955782	16	70	2	162.404	0.899296	-4.60288
Q8IJR8	Protein-serine/threonine phosphatase OS=Plasmodium falciparum (isolate 3D7) OX=36329 GN=PF3D7_1012700 PE=4 SV=1	37C	1	1.02825	0.998243	1.02743	1.01789	1.00711	1.00587	1.00156	1.0258	1.01719	43	73	2	11.8542	0.147414	-7.88376e-05
Q8IB03	Chaperone protein ClpB1 OS=Plasmodium falciparum (isolate 3D7) OX=36329 GN=PF3D7_0816600 PE=1 SV=1	37C	1	0.99924	1.01859	1.01895	1.01584	1.00499	1.02724	1.01801	1.03847	1.0369	30	76	2	0.8384	0.659593	0.26579
Q8IIG6	Phosphoglycerate mutase OS=Plasmodium falciparum (isolate 3D7) OX=36329 GN=PF3D7_1120100 PE=1 SV=1	37C	1	0.983953	0.981521	0.970235	0.978622	0.973417	0.980703	0.999851	1.03797	1.04364	18	242	2	16.6834	0.909213	2.91406
Q8I5T4	DNA helicase OS=Plasmodium falciparum (isolate 3D7) OX=36329 GN=PF3D7_1211700 PE=3 SV=1	37C	1	1.00956	1.02749	1.01822	1.00047	1.02314	1.03293	1.04354	1.01864	1.03978	29	80	2	0.206881	0.501773	0.220237
Q8IEN3	Carbamoyl phosphate synthetase OS=Plasmodium falciparum (isolate 3D7) OX=36329 GN=PF3D7_1308200 PE=4 SV=1	37C	1	1.01638	1.05706	1.03093	1.02351	1.00689	1.01989	0.986214	0.987153	0.980803	39	57	2	3.18508	0.5696	-0.981062
Q8IJS1	Hypoxanthine phosphoribosyltransferase OS=Plasmodium falciparum (isolate 3D7) OX=36329 GN=PF3D7_1012400 PE=3 SV=1	37C	1	0.98091	0.959195	0.937017	0.984606	0.938952	0.940702	0.900022	0.895749	0.811552	12	226	2	30.4494	0.855958	-0.540433
Q8IL08	Nucleoporin NUP313, putative OS=Plasmodium falciparum (isolate 3D7) OX=36329 GN=PF3D7_1446500 PE=4 SV=1	37C	1	0.976014	0.988552	0.983525	0.985252	0.991414	1.01379	1.06611	1.0887	1.18067	38	64	2	155.227	0.974436	0.605997
Q8IKL5	Valyl-tRNA synthetase OS=Plasmodium falciparum (isolate 3D7) OX=36329 GN=PF3D7_1461900 PE=3 SV=1	37C	1	0.996368	0.983415	0.995489	0.987556	1.00397	0.995264	1.01126	1.03335	0.999111	31	93	2	9.03576	0.492167	3.93128
Q8I403	Uncharacterized protein OS=Plasmodium falciparum (isolate 3D7) OX=36329 GN=PF3D7_0510100 PE=4 SV=1	37C	1	0.988232	0.990355	0.989535	0.990828	0.997296	0.983694	0.984289	0.966326	0.970639	47	84	2	8.70613	0.800278	-1.27577
Q8IDC6	Pyrroline-5-carboxylate reductase, putative OS=Plasmodium falciparum (isolate 3D7) OX=36329 GN=PF3D7_1357900 PE=1 SV=1	37C	1	1.00338	0.997968	0.98185	0.984027	1.00293	0.985851	1.01615	1.03175	0.960684	13	104	2	0.751409	0.00393726	-0.0136712
Q8I6Z1	Acyl-CoA synthetase OS=Plasmodium falciparum (isolate 3D7) OX=36329 GN=PF3D7_0731600 PE=4 SV=1	37C	1	1.12362	1.08004	1.08575	1.09936	1.02204	1.03325	1.02458	1.01873	0.976542	22	72	2	1.09725	0.452005	-1.20031
Q8IIW2	Phenylalanyl-tRNA synthetase beta subunit OS=Plasmodium falciparum (isolate 3D7) OX=36329 GN=PF3D7_1104000 PE=3 SV=1	37C	1	0.998727	0.99416	0.986902	0.994638	0.995741	0.984298	0.978447	0.976433	0.935108	28	92	2	62.8284	0.884881	-1.04851
Q8IL94	Ribonucleoside-diphosphate reductase OS=Plasmodium falciparum (isolate 3D7) OX=36329 GN=PF3D7_1437200 PE=3 SV=1	37C	1	0.991019	1.00018	1.00765	0.987833	1.00475	1.00799	1.05917	1.06399	1.06238	32	86	2	5.48992	0.964736	3.04412
A0A143ZX41	Merozoite surface antigen 2 OS=Plasmodium falciparum (isolate 3D7) OX=36329 GN=PF3D7_0206800 PE=4 SV=1	37C	1	1.11845	1.04784	1.10379	1.09616	1.02748	1.02602	0.988148	0.980962	0.935887	9	109	2	5.46036	0.647628	-0.860447
Q8I238	Chromatin assembly factor 1 protein WD40 domain, putative OS=Plasmodium falciparum (isolate 3D7) OX=36329 GN=PF3D7_0110700 PE=4 SV=1	37C	1	0.973475	0.971716	0.975668	0.951613	0.969019	0.940151	0.917392	0.899859	0.839432	14	59	2	32.5756	0.931966	-0.528937
Q8IJP3	Cysteinyl-tRNA synthetase OS=Plasmodium falciparum (isolate 3D7) OX=36329 GN=PF3D7_1015200.1 PE=3 SV=2	37C	1	0.985139	1.00144	1.00841	0.992649	1.00184	0.999289	0.99067	0.995601	0.983377	24	90	2	7.8621	0.272114	-4.10679
Q8IAV1	Uncharacterized protein OS=Plasmodium falciparum (isolate 3D7) OX=36329 GN=PF3D7_0811600 PE=4 SV=1	37C	1	1.15911	1.0913	1.14442	1.15155	1.06205	1.08157	1.0301	1.0421	1.0293	27	60	2	2.89684	0.323623	-1.30431
Q8I3A1	Replication protein A1, small OS=Plasmodium falciparum (isolate 3D7) OX=36329 GN=PF3D7_0904800 PE=4 SV=1	37C	1	0.973579	1.0075	1.011	0.980558	1.01101	0.989715	1.00636	1.0033	1.00178	21	90	2	0.0073369	0.148876	2.09892
Q8IBP8	Apoptosis-inducing factor, putative OS=Plasmodium falciparum (isolate 3D7) OX=36329 GN=PF3D7_0720400 PE=4 SV=1	37C	1	0.99676	1.00193	0.994862	0.996753	1.00877	0.981929	0.979742	0.976201	0.912338	21	82	2	124.585	0.914762	-1.37743
C6KSY0	AP2 domain transcription factor, putative OS=Plasmodium falciparum (isolate 3D7) OX=36329 GN=PF3D7_0613800 PE=4 SV=1	37C	1	0.982966	0.988841	0.975759	0.997965	0.990868	0.991793	0.996463	0.998273	0.993811	37	72	2	0.679947	0.187783	1.02738
C6KSR8	Translation initiation factor IF-2, putative OS=Plasmodium falciparum (isolate 3D7) OX=36329 GN=PF3D7_0607000 PE=4 SV=1	37C	1	0.999979	1.00252	1.007	0.994182	1.0162	0.993897	1.02745	1.04599	1.04753	29	63	2	11.7079	0.898465	3.04823
Q8IDB7	CUGBP Elav-like family member 1 OS=Plasmodium falciparum (isolate 3D7) OX=36329 GN=PF3D7_1359400 PE=4 SV=1	37C	1	0.988746	0.985787	0.995165	0.961318	1.00964	0.995958	1.04449	1.06189	1.04171	16	89	2	6.42076	0.822833	3.11792
C0H4U5	Uncharacterized protein OS=Plasmodium falciparum (isolate 3D7) OX=36329 GN=PF3D7_0813400 PE=4 SV=1	37C	1	1.00452	1.00949	1.02037	0.993409	1.02599	1.01669	1.04101	1.0545	1.06238	15	109	2	7.26935	0.858032	0.842675
Q8IM45	Uncharacterized protein OS=Plasmodium falciparum (isolate 3D7) OX=36329 GN=PF3D7_1404900 PE=4 SV=1	37C	1	0.983152	1.02128	1.00378	0.994712	1.00524	0.99578	1.02393	0.893331	1.01353	17	170	2	2213.76	0.0784458	-0.273153
A0A5K1K9F3	26S proteasome regulatory subunit RPN3, putative OS=Plasmodium falciparum (isolate 3D7) OX=36329 GN=PF3D7_1338100 PE=3 SV=1	37C	1	1.05381	1.03305	1.04796	1.04942	1.0234	1.03803	1.04293	1.07014	1.06641	20	73	2	0.00957317	0.605645	0.076464
Q8IJS8	UV excision repair protein RAD23 OS=Plasmodium falciparum (isolate 3D7) OX=36329 GN=PF3D7_1011700 PE=3 SV=1	37C	1	0.991445	0.995206	0.990945	1.00592	1.0034	1.00177	1.05078	1.07482	1.08285	16	73	2	9.69765	0.981078	2.22247
Q8IJP6	Uncharacterized protein OS=Plasmodium falciparum (isolate 3D7) OX=36329 GN=PF3D7_1014900 PE=4 SV=1	37C	1	0.973956	0.993656	0.956975	0.996485	0.986737	0.996702	0.986398	1.03317	1.01353	46	69	2	20.8723	0.568632	8.59949
Q8IKG8	Uncharacterized protein OS=Plasmodium falciparum (isolate 3D7) OX=36329 GN=PF3D7_1466900 PE=4 SV=2	37C	1	0.922174	0.95917	0.910671	0.916113	0.924734	0.930664	0.943738	0.938386	0.970639	38	58	2	423.006	5.8222e-05	0.235518
Q8IHU4	J domain-containing protein OS=Plasmodium falciparum (isolate 3D7) OX=36329 GN=PF3D7_1142100 PE=4 SV=1	37C	1	0.998057	0.989161	0.993592	0.994192	1.00712	0.989096	1.01646	1.00846	1.04851	37	71	2	139.893	0.808145	1.11281
Q8I2B4	Erythrocyte binding antigen-181 OS=Plasmodium falciparum (isolate 3D7) OX=36329 GN=PF3D7_0102500 PE=4 SV=1	37C	1	1.01203	1.00686	1.01799	1.01065	0.987658	1.006	0.943869	0.930437	0.871994	37	44	2	28.3423	0.939914	-0.844024
Q8IAU3	6-hydroxymethyl-7,8-dihydropterin pyrophosphokinase OS=Plasmodium falciparum (isolate 3D7) OX=36329 GN=PF3D7_0810800 PE=3 SV=1	37C	1	1.00464	1.00038	1.00297	0.997934	0.999844	0.985939	0.975631	0.982709	0.936667	26	116	2	155.741	0.882424	-0.665704
Q8IIB7	Ethanolamine kinase OS=Plasmodium falciparum (isolate 3D7) OX=36329 GN=PF3D7_1124600 PE=4 SV=1	37C	1	0.994398	1.00358	1.0078	0.992526	1.00489	0.999603	1.00456	0.986558	0.970639	21	76	2	51.3586	0.82229	-4.27183
Q8IJS3	Rhoptry associated adhesin OS=Plasmodium falciparum (isolate 3D7) OX=36329 GN=PF3D7_1012200 PE=4 SV=1	37C	1	0.9933	1.00141	0.99987	1.01254	1.0053	1.00533	1.02741	1.04281	1.04851	24	124	2	8.18863	0.929333	1.49576
C6KSR4	Uncharacterized protein OS=Plasmodium falciparum (isolate 3D7) OX=36329 GN=PF3D7_0606600 PE=4 SV=1	37C	1	1.00018	0.9998	0.98381	0.991915	0.98572	0.966469	0.958702	0.940971	0.907183	42	72	2	80.7157	0.971342	-0.45959
Q8I3J3	Ubiquitin carboxyl-terminal hydrolase OS=Plasmodium falciparum (isolate 3D7) OX=36329 GN=PF3D7_0527200 PE=3 SV=1	37C	1	0.995576	0.990643	1.0009	0.993715	1.00843	0.979627	0.970533	0.972295	0.925865	18	66	2	73.6025	0.86229	-0.770772
Q8I5M2	Arginyl-tRNA synthetase OS=Plasmodium falciparum (isolate 3D7) OX=36329 GN=PF3D7_1218600 PE=1 SV=1	37C	1	0.968365	0.990312	0.989805	0.970329	0.996638	0.985097	0.983494	0.98532	0.979948	20	97	2	8.05282	0.270807	4.968e-05
Q8IJD0	Peroxiredoxin OS=Plasmodium falciparum (isolate 3D7) OX=36329 GN=PF3D7_1027300 PE=4 SV=1	37C	1	1.00415	0.986668	1.01296	1.01005	1.02866	0.983385	1.00892	1.01202	1.02368	14	98	2	0.331532	0.139425	0.252474
Q9TY94	ATP-dependent RNA helicase UAP56 OS=Plasmodium falciparum (isolate 3D7) OX=36329 GN=PF3D7_0209800 PE=4 SV=1	37C	1	1.04261	1.01324	1.03341	1.03326	1.01776	1.0481	1.0702	1.07124	1.04074	15	111	2	0.100587	0.551442	0.202503
Q8I2V4	Regulator of chromosome condensation-PP1-interacting protein OS=Plasmodium falciparum (isolate 3D7) OX=36329 GN=PF3D7_0919900 PE=4 SV=1	37C	1	0.996989	0.996792	0.988998	0.992036	0.996393	0.997672	0.99615	1.00118	1.0117	32	71	2	67.1546	0.742943	2.43714
Q8I3B4	ATP-dependent RNA helicase DDX60, putative OS=Plasmodium falciparum (isolate 3D7) OX=36329 GN=PF3D7_0903400 PE=4 SV=1	37C	1	0.988919	0.99143	0.986118	0.996779	1.00226	0.985734	1.00723	1.05808	1.03594	45	68	2	15.0271	0.897985	5.4553
Q8IAR6	26S proteasome regulatory subunit RPN10, putative OS=Plasmodium falciparum (isolate 3D7) OX=36329 GN=PF3D7_0807800 PE=4 SV=1	37C	1	1.02167	1.02098	1.01757	1.01404	1.00274	1.0035	1.00297	1.02103	0.95335	18	65	2	165.599	0.818232	-4.89131
A0A5K1K8X7	Uncharacterized protein OS=Plasmodium falciparum (isolate 3D7) OX=36329 GN=PF3D7_1369500 PE=4 SV=1	37C	1	0.973922	1.00902	0.988122	0.989639	0.980252	0.977288	0.965677	0.962816	0.922067	28	55	2	35.0856	0.79773	-0.641377
Q8IJP9	Transcriptional coactivator ADA2 OS=Plasmodium falciparum (isolate 3D7) OX=36329 GN=PF3D7_1014600 PE=4 SV=1	37C	1	0.995567	0.959528	0.989583	0.990416	1.00937	0.995245	1.01819	1.03157	1.03309	26	57	2	5.38396	0.692909	0.726478
Q8IL88	HSP40, subfamily A OS=Plasmodium falciparum (isolate 3D7) OX=36329 GN=PF3D7_1437900 PE=4 SV=1	37C	1	1.03195	1.03761	1.03073	1.03412	1.00696	1.02186	0.983464	0.978171	0.882261	19	83	2	96.743	0.894326	-1.09653
Q8IIV8	Thioredoxin-like mero protein OS=Plasmodium falciparum (isolate 3D7) OX=36329 GN=PF3D7_1104400 PE=4 SV=1	37C	1	0.979336	0.989542	0.991379	0.979459	0.99279	0.997273	1.03385	1.04481	1.0654	19	116	2	10.9987	0.943855	1.19556
Q8IL48	tRNA import protein tRIP OS=Plasmodium falciparum (isolate 3D7) OX=36329 GN=PF3D7_1442300 PE=4 SV=1	37C	1	0.94067	0.97618	0.938896	0.95347	0.95089	0.970436	0.986132	1.02606	0.970639	21	120	2	6.09352	0.351128	2.1843
Q8IJ76	Early transcribed membrane protein 10.2 OS=Plasmodium falciparum (isolate 3D7) OX=36329 GN=PF3D7_1033200 PE=4 SV=1	37C	1	1.02187	0.999914	1.00778	0.995302	1.01316	1.01765	1.04194	1.07019	1.0654	12	64	2	9.36464	0.919497	1.49809
Q6ZLZ9	Tubulin alpha chain OS=Plasmodium falciparum (isolate 3D7) OX=36329 GN=PF3D7_0903700 PE=3 SV=1	37C	1	1.05427	1.05572	1.07454	1.03439	1.04124	1.02675	1.00652	0.950276	0.900641	10	63	2	32.2324	0.871316	-1.11512
Q8I246	Phenylalanine--tRNA ligase OS=Plasmodium falciparum (isolate 3D7) OX=36329 GN=PF3D7_0109800 PE=3 SV=1	37C	1	1.01148	1.00454	1.0189	1.01037	1.01937	1.00837	1.021	1.02517	1.03594	24	83	2	0.63521	0.675709	0.22811
Q8I624	SRAP domain-containing protein, putative OS=Plasmodium falciparum (isolate 3D7) OX=36329 GN=PF3D7_1202100.1 PE=3 SV=1	37C	1	0.948926	0.931444	0.917804	0.922433	0.939631	0.949534	0.932553	1.01953	0.978242	1	52	2	24.711	0.471416	5.56387
Q8IJI4	PHAX domain-containing protein, putative OS=Plasmodium falciparum (isolate 3D7) OX=36329 GN=PF3D7_1021900 PE=4 SV=1	37C	1	0.995477	0.994363	0.992348	1.00223	0.992369	1.0178	1.02982	1.02406	1.0369	46	92	2	2.66774	0.9332	3.07099
Q8IBM9	Obg-like ATPase 1 OS=Plasmodium falciparum (isolate 3D7) OX=36329 GN=PF3D7_0722400 PE=3 SV=1	37C	1	0.972024	0.988336	0.982508	0.95962	0.982666	0.989121	1.01914	1.02367	1.07766	23	86	2	48.8046	0.861006	0.908696
Q8I0U6	Ring-infected erythrocyte surface antigen OS=Plasmodium falciparum (isolate 3D7) OX=36329 GN=PF3D7_0102200 PE=4 SV=1	37C	1	1.05451	1.02011	1.03506	1.01388	1.02063	1.00886	1.01011	1.03007	1.00268	20	78	2	0.1883	0.142498	-1.39741
O97249	40S ribosomal protein S12 OS=Plasmodium falciparum (isolate 3D7) OX=36329 GN=RPS12 PE=1 SV=1	37C	1	0.947457	0.976727	0.959683	0.971541	0.969606	0.975843	0.976041	0.957088	0.950931	11	162	2	1431.55	0.515804	0.00545385
Q8I482	Protein HIRA OS=Plasmodium falciparum (isolate 3D7) OX=36329 GN=PF3D7_0501800 PE=3 SV=1	37C	1	0.996139	1.00824	0.996206	0.985736	0.988024	0.962429	0.960235	0.972947	0.971478	22	51	2	0.47634	0.846515	-1.12234
Q8IB09	Uncharacterized protein OS=Plasmodium falciparum (isolate 3D7) OX=36329 GN=PF3D7_0817300 PE=4 SV=1	37C	1	1.01444	1.0009	0.997585	1.01322	1.02796	0.996799	1.0097	1.01241	1.00988	26	55	2	1.33115e+08	0.101422	0.033928
Q76NN6	Ran-specific GTPase-activating protein 1, putative OS=Plasmodium falciparum (isolate 3D7) OX=36329 GN=PF3D7_0419600 PE=4 SV=1	37C	1	0.987861	1.00826	1.01822	0.971363	1.01139	0.982754	1.00997	1.04341	1.03978	21	122	2	10.0565	0.585508	2.60978
Q8IKV6	Rhoptry neck protein 2 OS=Plasmodium falciparum (isolate 3D7) OX=36329 GN=PF3D7_1452000 PE=1 SV=1	37C	1	1.04305	1.01452	1.03329	1.04227	1.05309	1.02952	1.0441	1.0563	1.10739	32	54	2	1.02657	0.61349	0.204328
Q8IKF0	Eukaryotic initiation factor 4A OS=Plasmodium falciparum (isolate 3D7) OX=36329 GN=PF3D7_1468700 PE=3 SV=1	37C	1	1.01248	1.00978	1.05431	1.03434	1.00167	1.02763	0.993483	0.942414	0.913821	16	125	2	23.035	0.847458	-1.74068
O96165	Serine repeat antigen 3 OS=Plasmodium falciparum (isolate 3D7) OX=36329 GN=PF3D7_0207800 PE=3 SV=1	37C	1	1.00891	1.03426	1.02	1.0075	1.00347	1.00211	0.976512	0.911322	0.868624	27	61	2	27.1253	0.966685	-1.31994
C6KTB3	Transportin OS=Plasmodium falciparum (isolate 3D7) OX=36329 GN=PF3D7_0627700 PE=4 SV=1	37C	1	1.02255	1.0102	1.0278	1.00586	0.993733	0.988505	0.997058	0.982275	0.959863	26	56	2	11.0963	0.727352	-0.517493
C6KSY1	Myosin E, putative OS=Plasmodium falciparum (isolate 3D7) OX=36329 GN=PF3D7_0613900 PE=3 SV=1	37C	1	0.989494	1.00111	0.990005	1.01254	1.00364	0.990219	0.973536	0.983425	0.986831	36	51	2	3.09409	0.584383	-4.22475
A0A144A1V5	SRAP domain-containing protein, putative OS=Plasmodium falciparum (isolate 3D7) OX=36329 GN=PF3D7_1202100.2 PE=3 SV=1	37C	1	0.971642	0.978473	0.959524	0.982274	0.992468	0.982603	1.01372	1.05765	1.04364	1	50	2	13.0465	0.870598	3.30782
Q8IDW4	Nuclear movement protein, putative OS=Plasmodium falciparum (isolate 3D7) OX=36329 GN=PF3D7_1336800 PE=4 SV=1	37C	1	0.996961	1.00232	1.00379	1.00023	0.993132	0.995085	0.990475	0.988044	0.974003	18	67	2	11.1947	0.838161	-0.634308
C6KTC6	Nicotinate phosphoribosyltransferase OS=Plasmodium falciparum (isolate 3D7) OX=36329 GN=PF3D7_0629100 PE=3 SV=1	37C	1	0.989834	0.99031	1.00906	0.976108	0.994631	0.977782	0.928164	0.881121	0.809215	20	85	2	66.7618	0.979896	-0.751207
Q8I535	Acyl-CoA synthetase OS=Plasmodium falciparum (isolate 3D7) OX=36329 GN=PF3D7_1238800 PE=4 SV=1	37C	1	1.04473	1.03619	1.03313	0.999116	0.979684	0.977405	0.951001	0.933899	1.0117	22	75	2	0.23066	0.613591	-1.73906
Q8IIS4	AP2 domain transcription factor, putative OS=Plasmodium falciparum (isolate 3D7) OX=36329 GN=PF3D7_1107800 PE=4 SV=1	37C	1	1.02237	0.991659	1.00028	1.00976	1.01433	0.984415	0.959493	0.923212	0.893482	24	53	2	21.894	0.951816	-0.965835
C6KT49	Uncharacterized protein OS=Plasmodium falciparum (isolate 3D7) OX=36329 GN=PF3D7_0621100 PE=4 SV=1	37C	1	0.98516	0.985154	0.989174	0.980672	0.980378	0.981585	0.963514	0.96348	0.958227	36	66	2	0.731762	0.866522	-0.258174
Q8I3J0	Hsc70-interacting protein OS=Plasmodium falciparum (isolate 3D7) OX=36329 GN=PF3D7_0527500 PE=3 SV=1	37C	1	0.998037	1.02302	1.01567	0.990928	0.992432	0.972183	0.933544	0.869686	0.804581	14	86	2	60.3202	0.98597	-0.674
Q8IJV6	Adenylate kinase OS=Plasmodium falciparum (isolate 3D7) OX=36329 GN=PF3D7_1008900 PE=3 SV=1	37C	1	0.982745	0.999787	1.02312	0.98413	1.02205	1.01855	1.0529	1.0193	1.07869	14	82	2	9.75176	0.646753	0.463121
A0A144A4G4	Triosephosphate isomerase OS=Plasmodium falciparum (isolate 3D7) OX=36329 GN=PF3D7_1439900 PE=3 SV=1	37C	1	0.967962	0.983822	0.969629	0.970897	0.985501	0.96442	1.02824	1.0352	1.08077	12	173	2	36.5341	0.859895	0.972868
A0A5K1K8W0	Polyubiquitin binding protein, putative OS=Plasmodium falciparum (isolate 3D7) OX=36329 GN=PF3D7_1363400 PE=4 SV=1	37C	1	0.977573	0.981507	0.998283	0.983943	0.986816	0.96442	0.926852	0.913982	0.864615	26	77	2	35.7223	0.956378	-0.664393
Q8I2J4	Profilin OS=Plasmodium falciparum (isolate 3D7) OX=36329 GN=Pfn PE=3 SV=1	37C	1	1.00388	0.97463	0.980653	0.996949	0.998416	0.97959	0.985068	0.999505	0.983377	8	85	2	0.76273	0.11054	-0.0347044
Q8IAR3	Proteasome subunit alpha type-6, putative OS=Plasmodium falciparum (isolate 3D7) OX=36329 GN=PF3D7_0807500 PE=1 SV=2	37C	1	1.001	1.01109	1.01996	0.997095	0.997779	1.01351	1.00024	1.02885	0.993811	13	87	2		0.0491157	4.05087e-05
Q76NN7	Peptidyl-prolyl cis-trans isomerase OS=Plasmodium falciparum (isolate 3D7) OX=36329 GN=PF3D7_0322000 PE=3 SV=1	37C	1	0.929117	0.97055	0.943333	0.948167	0.950945	0.966961	0.992158	0.989489	1.00089	7	175	2	4.36642	0.465447	3.20524
O96203	Eukaryotic peptide chain release factor subunit 1 OS=Plasmodium falciparum (isolate 3D7) OX=36329 GN=PF3D7_0212300 PE=3 SV=1	37C	1	1.01625	1.01226	1.03078	1.01072	1.01853	1.02347	1.03349	1.02092	1.01536	21	53	2	0.000244631	0.478269	0.301074
A0A143ZWU2	GBP130 protein OS=Plasmodium falciparum (isolate 3D7) OX=36329 GN=PF3D7_1016300 PE=4 SV=1	37C	1	0.979847	1.00407	1.00094	0.969989	0.995781	0.99599	1.057	1.05469	1.07766	17	78	2	6.96034	0.89827	3.10938
Q8IDX6	Reticulocyte-binding protein homolog 2a OS=Plasmodium falciparum (isolate 3D7) OX=36329 GN=RH2a PE=1 SV=1	37C	1	1.04215	1.02082	1.01365	1.03315	0.997438	1.01789	0.998475	1.00936	1.01996	8	58	2	0.393492	0.155443	-1.79871
Q8IDW3	Tryptophanyl-tRNA synthetase OS=Plasmodium falciparum (isolate 3D7) OX=36329 GN=PF3D7_1336900 PE=1 SV=1	37C	1	0.979623	0.970977	0.983948	0.97161	1.00909	0.984731	1.01069	0.988986	0.945332	22	56	2	34.9844	0.0785712	-0.0233917
Q8IEK3	26S protease regulatory subunit 7, putative OS=Plasmodium falciparum (isolate 3D7) OX=36329 GN=PF3D7_1311500 PE=3 SV=2	37C	1	1.03751	1.0632	1.05156	1.0467	1.01323	1.06049	1.0176	0.991696	0.968131	21	60	2	22.7278	0.607523	-1.78945
Q8IBI3	Proteasome subunit alpha type OS=Plasmodium falciparum (isolate 3D7) OX=36329 GN=PF3D7_0727400 PE=1 SV=1	37C	1	0.983699	1.00358	1.00035	0.998991	0.980352	1.00442	0.969721	0.999562	0.950931	14	96	2	179.111	0.572577	-5.56215
Q8I5C6	Uncharacterized protein OS=Plasmodium falciparum (isolate 3D7) OX=36329 GN=PF3D7_1229300 PE=4 SV=1	37C	1	1.00621	1.00171	1.00475	1.00209	1.0212	1.00772	1.06723	1.06846	1.08077	26	79	2	7.152	0.960294	3.65481
K7NTP5	Heat shock protein 70 OS=Plasmodium falciparum (isolate 3D7) OX=36329 GN=PF3D7_0831700 PE=1 SV=1	37C	1	0.976715	0.944319	1.01592	0.975208	1.03255	1.01055	1.01238	0.967776	1.01353	6	210	2	0.0425894	0.195955	1.50933
Q8I4S2	Coronin OS=Plasmodium falciparum (isolate 3D7) OX=36329 GN=PF3D7_1251200 PE=3 SV=1	37C	1	0.980712	1.01208	1.00344	0.995498	1.00326	1.0015	0.99755	0.982937	1.00537	23	51	2	0.0240899	0.00321157	0.0429001
Q8II72	Parasitophorous vacuolar protein 1 OS=Plasmodium falciparum (isolate 3D7) OX=36329 GN=PF3D7_1129100 PE=4 SV=1	37C	1	0.969493	1.00574	0.999347	0.972577	0.999012	0.992173	1.02309	0.986234	1.01079	13	89	2	2.98226	0.182048	1.84068
C0H5F4	Reticulocyte-binding protein homolog 2b OS=Plasmodium falciparum (isolate 3D7) OX=36329 GN=RH2b PE=1 SV=2	37C	1	0.956601	0.973381	0.944629	0.987676	0.985076	0.989818	1.03507	0.991357	1.02648	6	57	2	1.97684	0.524088	1.26555
Q8ILX3	Mini-chromosome maintenance complex-binding protein, putative OS=Plasmodium falciparum (isolate 3D7) OX=36329 GN=PF3D7_1412100 PE=4 SV=1	37C	1	1.00403	1.00596	1.00629	1.00303	1.0138	1.01126	1.00555	1.02968	1.03119	27	82	2	2.25727	0.683572	0.414799
Q8IDR8	Aconitate hydratase OS=Plasmodium falciparum (isolate 3D7) OX=36329 GN=PF3D7_1342100 PE=3 SV=1	37C	1	0.978091	0.969002	0.956723	0.965362	0.968655	0.999051	1.02752	1.07414	1.07252	29	64	2	10.0987	0.922296	1.34552
Q8IK90	Proteasome subunit alpha type-1, putative OS=Plasmodium falciparum (isolate 3D7) OX=36329 GN=PF3D7_1474800 PE=1 SV=1	37C	1	1.01425	1.01389	1.00602	0.999649	1.00068	1.02156	1.04142	1.08245	1.04558	9	80	2	7.11458	0.834733	1.76345
C0H4S8	Uncharacterized protein OS=Plasmodium falciparum (isolate 3D7) OX=36329 GN=PF3D7_0807600 PE=4 SV=1	37C	1	1.03869	1.01383	1.01356	1.0162	1.00594	0.980924	0.937563	0.955132	0.898481	29	52	2	8.69945	0.879912	-0.70074
C0H477	Inorganic diphosphatase OS=Plasmodium falciparum (isolate 3D7) OX=36329 GN=PF3D7_0316300.2 PE=3 SV=1	37C	1	0.987809	0.999747	1.00544	0.993806	1.00958	1.00873	1.01056	1.02227	1.0117	14	80	2	0.850959	0.66369	0.722739
O96221	Protein transport protein SEC31 OS=Plasmodium falciparum (isolate 3D7) OX=36329 GN=PF3D7_0214100 PE=3 SV=3	37C	1	1.00034	1.00924	1.01756	1.00122	0.994966	1.019	0.995464	0.982169	0.981659	31	75	2	3.54978	0.416194	-0.846843
Q8IJW4	Eukaryotic translation initiation factor 3 subunit D OS=Plasmodium falciparum (isolate 3D7) OX=36329 GN=PF3D7_1007900 PE=3 SV=1	37C	1	0.917862	0.969396	0.939046	0.930327	0.938255	0.928653	0.934824	0.932022	0.929694	23	49	2	91554.4	0.717852	0.0247587
O77312	Exportin-1, putative OS=Plasmodium falciparum (isolate 3D7) OX=36329 GN=PF3D7_0302900 PE=4 SV=2	37C	1	1.1028	1.05647	1.09342	1.08856	1.00829	1.09866	1.04233	1.06648	0.971478	26	51	2	82.5665	0.381525	-7.51818
Q8I6V3	Plasmepsin II OS=Plasmodium falciparum (isolate 3D7) OX=36329 GN=PMII PE=1 SV=1	37C	1	0.996178	0.993307	0.996626	1.00169	1.02082	0.983114	1.00603	1.02069	1.00717	10	77	2	0.181239	0.178991	0.530422
O77330	Asparagine synthetase [glutamine-hydrolyzing], putative OS=Plasmodium falciparum (isolate 3D7) OX=36329 GN=PF3D7_0309500 PE=4 SV=1	37C	1	0.986825	1.00193	0.992521	0.982275	0.999705	0.985489	1.0207	1.04011	1.04267	19	59	2	11.5708	0.910278	3.94105
O77396	Proteasome subunit alpha type-3, putative OS=Plasmodium falciparum (isolate 3D7) OX=36329 GN=PF3D7_0317000 PE=1 SV=1	37C	1	1.0292	1.01685	1.0119	1.02423	1.01074	1.00303	1.01881	1.04884	1.01996	11	76	2	0.538398	0.238333	0.0637847
A0A143ZVU1	Thioredoxin reductase OS=Plasmodium falciparum (isolate 3D7) OX=36329 GN=PF3D7_0923800.2 PE=3 SV=1	37C	1	0.985771	0.981575	0.986268	0.988951	1.00978	0.984893	0.985896	1.00447	0.941374	16	62	2	154.264	0.738649	-6.20689
Q8I5F4	Haloacid dehalogenase-like hydrolase, putative OS=Plasmodium falciparum (isolate 3D7) OX=36329 GN=PF3D7_1226300 PE=4 SV=1	37C	1	0.982868	0.978859	0.995399	0.983187	0.989172	0.985358	1.00668	1.04247	0.996454	14	91	2	11.3156	0.54462	4.10729
Q8IK15	EMP1-trafficking protein OS=Plasmodium falciparum (isolate 3D7) OX=36329 GN=PF3D7_1002100 PE=4 SV=1	37C	1	1.02568	1.0245	1.01993	1.01731	1.01279	1.0129	1.0412	1.0403	1.05441	18	55	2	0.42352	0.563967	0.180286
Q8I0V2	ATP synthase subunit beta OS=Plasmodium falciparum (isolate 3D7) OX=36329 GN=PF3D7_1235700 PE=3 SV=1	37C	1	0.955196	0.989632	0.991403	0.971217	0.995737	0.971847	1.00784	0.974018	0.977391	12	49	2	0.757776	1.72549e-06	0.438017
Q8I3B3	Nucleoporin NUP138, putative OS=Plasmodium falciparum (isolate 3D7) OX=36329 GN=PF3D7_0903500 PE=4 SV=1	37C	1	0.98477	1.00731	0.9963	0.995429	0.999507	1.01758	1.04168	1.0291	1.07663	25	42	2	13.1474	0.84765	0.676868
Q8IJ72	Bromodomain protein 1 OS=Plasmodium falciparum (isolate 3D7) OX=36329 GN=PF3D7_1033700 PE=1 SV=1	37C	1	0.951282	0.986028	0.976903	0.949696	0.960405	0.955401	0.945191	0.9175	0.911598	26	52	2	3.94012	0.77164	-0.22643
Q8IIJ8	Heat shock protein 101 OS=Plasmodium falciparum (isolate 3D7) OX=36329 GN=PF3D7_1116800 PE=1 SV=1	37C	1	1.13643	1.09824	1.12902	1.13703	1.01658	1.08697	1.01157	1.04141	1.01079	30	47	2	2.07604	0.309906	-1.00949
Q8I603	Eukaryotic translation initiation factor 5A OS=Plasmodium falciparum (isolate 3D7) OX=36329 GN=PF3D7_1204300 PE=3 SV=1	37C	1	0.981788	0.961496	0.97889	0.975831	0.990041	0.987734	0.974085	0.960783	0.934331	10	146	2	9.64402	0.442925	-0.184416
C6KST3	Proteasome subunit alpha type-2, putative OS=Plasmodium falciparum (isolate 3D7) OX=36329 GN=PF3D7_0608500 PE=1 SV=1	37C	1	0.967661	0.99588	0.96038	0.962268	0.982715	1.00565	1.05898	1.13616	1.08704	11	89	2	8.34286	0.901921	1.79595
C6KT25	L-lactate dehydrogenase OS=Plasmodium falciparum (isolate 3D7) OX=36329 GN=PF3D7_0618500 PE=1 SV=1	37C	1	0.981339	0.993985	1.00093	0.980706	1.02717	0.997642	1.00081	0.964589	0.945332	14	44	2	43.7443	0.68062	-4.46225
Q8ILE9	Succinate--CoA ligase [ADP-forming] subunit beta, mitochondrial OS=Plasmodium falciparum (isolate 3D7) OX=36329 GN=PF3D7_1431600 PE=3 SV=1	37C	1	0.964182	0.972817	0.975054	0.969956	0.959789	0.988174	0.961319	0.954268	0.945332	19	54	2	0.185888	0.593692	-0.102509
Q8IDN4	DNA/RNA-binding protein Alba 2 OS=Plasmodium falciparum (isolate 3D7) OX=36329 GN=PF3D7_1346300 PE=4 SV=1	37C	1	1.00632	0.989064	0.99127	1.00157	1.01098	0.985188	1.02637	1.063	1.00089	10	74	2	8.15615	0.429931	1.97639
Q8IDG2	Proteasome subunit alpha type OS=Plasmodium falciparum (isolate 3D7) OX=36329 GN=PF3D7_1353900 PE=1 SV=1	37C	1	1.01809	1.00791	1.00667	1.0046	1.01074	0.997461	1.02947	1.06605	1.01996	11	109	2	10.0898	0.601318	2.2107
Q8IJ49	PUM-HD domain-containing protein OS=Plasmodium falciparum (isolate 3D7) OX=36329 GN=PF3D7_1035900 PE=4 SV=1	37C	1	0.999715	0.994071	1.03665	0.958119	1.0158	0.999305	1.02289	1.00293	1.06138	18	44	2	5.60542	0.26386	0.899336
C0H4M6	Regulator of chromosome condensation, putative OS=Plasmodium falciparum (isolate 3D7) OX=36329 GN=PF3D7_0711500 PE=4 SV=2	37C	1	0.992665	0.979908	0.986238	0.973626	1.0008	0.981996	0.981614	0.989989	0.910859	21	54	2	161.688	0.885278	-5.34129
Q8IBN1	Rhoptry-associated leucine zipper-like protein 1 OS=Plasmodium falciparum (isolate 3D7) OX=36329 GN=PF3D7_0722200 PE=4 SV=1	37C	1	1.00999	1.00692	1.01078	1.02681	1.00652	1.00712	0.986742	1.01468	0.997338	27	68	2	2.15936	0.19437	-1.54304
Q8II92	Deoxyuridine 5'-triphosphate nucleotidohydrolase OS=Plasmodium falciparum (isolate 3D7) OX=36329 GN=PF3D7_1127100 PE=1 SV=1	37C	1	0.988571	0.987566	1.00017	1.00738	1.01826	0.959612	0.995961	1.01664	0.987698	9	49	2		0.00644322	2.17199e-05
Q8I3F1	PRESAN domain-containing protein OS=Plasmodium falciparum (isolate 3D7) OX=36329 GN=PF3D7_0532300 PE=4 SV=1	37C	1	0.963329	1.01332	0.98532	0.961358	0.979757	0.992222	1.02478	1.01142	1.03978	19	64	2	4.98673	0.582796	2.85588
Q8IC28	tRNA m5C-methyltransferase, putative OS=Plasmodium falciparum (isolate 3D7) OX=36329 GN=PF3D7_0704200 PE=3 SV=1	37C	1	1.00011	0.978676	0.990563	0.994822	0.99026	1.00443	0.968901	0.992115	0.950127	25	51	2	35.883	0.486633	-0.927293
Q8IJ52	Duffy binding-like merozoite surface protein OS=Plasmodium falciparum (isolate 3D7) OX=36329 GN=PF3D7_1035700 PE=4 SV=1	37C	1	1.02662	1.01192	1.01638	1.03066	0.98744	1.00253	0.966799	0.942193	0.919804	25	44	2	16.5132	0.902679	-0.818965
Q8IAR7	Tyrosine--tRNA ligase OS=Plasmodium falciparum (isolate 3D7) OX=36329 GN=PF3D7_0807900 PE=1 SV=1	37C	1	0.981059	0.977889	0.972388	0.953551	1.00736	0.97447	1.02371	1.03653	0.996454	13	52	2	6.35729	0.521023	8.32271
Q8I548	Uncharacterized protein OS=Plasmodium falciparum (isolate 3D7) OX=36329 GN=PF3D7_1237500 PE=4 SV=1	37C	1	1.01186	0.979672	0.990927	1.00136	1.02865	1.00905	1.01369	0.98995	0.989437	26	47	2	3.7881	0.00013762	0.159839
Q8I358	Exoribonuclease, putative OS=Plasmodium falciparum (isolate 3D7) OX=36329 GN=PF3D7_0909400 PE=3 SV=1	37C	1	0.983514	0.992902	0.978012	0.998371	1.00251	1.00964	1.0693	1.09735	1.08494	26	48	2	6.54631	0.968695	1.96689
Q8I226	TatD-like deoxyribonuclease OS=Plasmodium falciparum (isolate 3D7) OX=36329 GN=PF3D7_0112000 PE=4 SV=2	37C	1	0.986438	0.979482	0.999902	0.969731	1.0127	0.994517	1.0536	1.05255	1.02555	18	52	2	4.67808	0.765838	6.78429
O96163	Serine repeat antigen 7 OS=Plasmodium falciparum (isolate 3D7) OX=36329 GN=PF3D7_0207400 PE=3 SV=1	37C	1	0.997533	1.03732	0.963656	1.03999	1.00964	0.995985	0.946531	0.983123	0.914565	26	50	2	4.70034	0.53066	-3.04
Q8IM31	Glycerophosphodiester phosphodiesterase OS=Plasmodium falciparum (isolate 3D7) OX=36329 GN=PF3D7_1406300 PE=4 SV=1	37C	1	0.986927	0.990839	0.997338	0.991561	0.987865	0.988595	0.97542	0.988317	0.957411	19	54	2	9.99347	0.616211	-0.566723
C0H516	Ras-related protein RAB7 OS=Plasmodium falciparum (isolate 3D7) OX=36329 GN=PF3D7_0903200 PE=4 SV=1	37C	1	1.01371	0.995951	1.01164	1.01321	0.988129	1.00471	0.987146	0.990074	0.980803	11	51	2	5.94034	0.538228	-0.702265
Q8IJ74	Haloacid dehalogenase-like hydrolase OS=Plasmodium falciparum (isolate 3D7) OX=36329 GN=PF3D7_1033400 PE=1 SV=1	37C	1	0.968983	0.959332	0.947802	0.972441	0.937384	0.970734	0.937267	0.939731	0.87744	12	81	2	11.894	0.645113	-0.197228
A0A143ZXE1	Uncharacterized protein OS=Plasmodium falciparum (isolate 3D7) OX=36329 GN=PF3D7_0529400.1 PE=4 SV=1	37C	1	1.00143	0.983515	0.969573	0.982247	0.999442	0.991207	1.03869	1.05066	1.07354	23	39	2	10.9883	0.896701	1.42502
Q7KQJ9	Proliferating cell nuclear antigen OS=Plasmodium falciparum (isolate 3D7) OX=36329 GN=PF3D7_1226600 PE=3 SV=1	37C	1	0.987412	0.984176	0.984474	0.979006	0.995742	0.975593	0.935627	0.936963	0.796598	9	57	2	166.313	0.942569	-1.12476
Q8I4V8	Peptidyl-prolyl cis-trans isomerase FKBP35 OS=Plasmodium falciparum (isolate 3D7) OX=36329 GN=PF3D7_1247400 PE=1 SV=1	37C	1	0.954193	0.988494	0.969463	0.980685	0.966273	0.994819	0.969473	1.00021	0.95335	17	79	2	24.7394	0.195008	5.75719e-06
A0A144A1Y0	Calmodulin OS=Plasmodium falciparum (isolate 3D7) OX=36329 GN=PF3D7_1434200 PE=4 SV=1	37C	1	0.97353	0.979663	0.964361	0.96654	0.976012	1.01588	1.08869	1.1617	1.18942	7	81	2	11.7707	0.985507	1.23393
Q8IE96	Nucleoside-diphosphatase, putative OS=Plasmodium falciparum (isolate 3D7) OX=36329 GN=PF3D7_1322000 PE=3 SV=1	37C	1	0.993602	1.0066	1.01866	0.989315	1.01968	1.02073	1.01116	1.03717	1.00089	20	61	2	0.131997	0.256645	0.540789
Q8IEQ1	26S protease regulatory subunit 10B, putative OS=Plasmodium falciparum (isolate 3D7) OX=36329 GN=PF3D7_1306400 PE=3 SV=1	37C	1	1.01034	0.999297	0.956282	0.998613	0.96376	1.01704	1.10184	1.19618	1.17573	17	56	2	10.3514	0.952881	1.99735
Q8I5P5	Glycerol-3-phosphate dehydrogenase [NAD(+)] OS=Plasmodium falciparum (isolate 3D7) OX=36329 GN=PF3D7_1216200 PE=1 SV=1	37C	1	0.978025	1.00836	1.00433	0.974208	0.992215	0.988883	1.02338	1.02498	1.02648	17	89	2	6.68398	0.689093	5.70956
O96201	Uncharacterized protein OS=Plasmodium falciparum (isolate 3D7) OX=36329 GN=PF3D7_0212100 PE=4 SV=1	37C	1	0.972397	0.995172	0.974837	0.98751	0.985639	0.973958	0.979003	0.990061	0.988566	23	43	2	34.997	0.32746	2.24801e-05
Q8I549	Hydrolase, putative OS=Plasmodium falciparum (isolate 3D7) OX=36329 GN=PF3D7_1237400 PE=4 SV=1	37C	1	0.985022	0.964486	0.985036	0.986318	0.994938	0.964796	0.938929	0.927347	0.894904	17	37	2	15.3183	0.897572	-0.912261
Q8IEC3	tRNA (Guanine(26)-N(2))-dimethyltransferase, putative OS=Plasmodium falciparum (isolate 3D7) OX=36329 GN=PF3D7_1319300 PE=3 SV=1	37C	1	0.987768	0.989818	0.980978	1.00163	0.972881	0.967624	0.959874	0.992013	0.958227	21	64	2	0.547411	0.530801	-3.1759
Q7K6A9	Proteasome subunit beta OS=Plasmodium falciparum (isolate 3D7) OX=36329 GN=PF3D7_0803800 PE=1 SV=1	37C	1	0.999798	0.999019	1.00014	0.984952	0.986694	0.992229	0.994425	1.04656	1.00898	12	102	2	20.2452	0.638168	5.55933
A0A143ZWL7	Tubulin beta chain OS=Plasmodium falciparum (isolate 3D7) OX=36329 GN=PF3D7_1008700 PE=3 SV=1	37C	1	1.01994	1.04003	1.02975	1.02645	0.980954	1.03165	0.980148	0.976424	0.8992	14	65	2	59.9841	0.783383	-1.10326
C6KT30	FPL domain-containing protein OS=Plasmodium falciparum (isolate 3D7) OX=36329 GN=PF3D7_0619000.1 PE=3 SV=1	37C	1	1.028	1.00591	1.01026	1.01167	1.00964	1.01718	1.00165	1.00497	0.986831	29	51	2	3.07982	0.296407	-0.766036
C6KT13	Uncharacterized protein OS=Plasmodium falciparum (isolate 3D7) OX=36329 GN=PF3D7_0617200 PE=4 SV=1	37C	1	0.958797	1.00969	0.982189	0.97379	0.984686	0.983452	0.991202	0.991589	0.976542	21	52	2	1.3732	0.134475	7.93456e-05
Q8ILP4	Pantothenate kinase 1, putative OS=Plasmodium falciparum (isolate 3D7) OX=36329 GN=PF3D7_1420600 PE=4 SV=2	37C	1	1.00597	1.00965	1.01089	1.00695	1.0109	0.987178	0.961457	0.957434	0.905721	19	50	2	39.3588	0.942595	-0.730705
Q8I231	UMP-CMP kinase, putative OS=Plasmodium falciparum (isolate 3D7) OX=36329 GN=PF3D7_0111500 PE=3 SV=1	37C	1	1.02957	1.02667	1.04713	1.00682	1.02904	1.01292	1.02601	0.982545	0.964807	13	47	2	15.2623	0.607546	-1.60478
Q8I544	Uncharacterized protein OS=Plasmodium falciparum (isolate 3D7) OX=36329 GN=PF3D7_1237900 PE=4 SV=1	37C	1	1.01037	0.987543	0.985658	1.00071	0.998127	0.996583	1.00116	1.05914	1.05441	29	36	2	21.8875	0.926616	4.11617
Q9U0J0	Replication protein A1, large subunit OS=Plasmodium falciparum (isolate 3D7) OX=36329 GN=PF3D7_0409600 PE=3 SV=1	37C	1	1.0024	1.01244	1.02744	0.999249	1.01989	1.00851	0.997493	0.987113	0.966466	22	46	2	10.6489	0.658663	-1.45308
C6KSM2	MYND-type zinc finger protein, putative OS=Plasmodium falciparum (isolate 3D7) OX=36329 GN=PF3D7_0602200 PE=4 SV=1	37C	1	0.998951	0.98087	0.994281	0.985435	1.01726	0.961059	0.941965	0.922629	0.856707	15	45	2	73.476	0.919233	-0.696005
Q8IIW4	CCR4-NOT transcription complex subunit 1, putative OS=Plasmodium falciparum (isolate 3D7) OX=36329 GN=PF3D7_1103800 PE=4 SV=1	37C	1	1.02939	1.01621	1.03793	1.02601	1.01236	1.02062	1.01382	1.01329	1.04171	36	59	2	0.00985937	0.339393	0.000173826
C6KT20	Uncharacterized protein OS=Plasmodium falciparum (isolate 3D7) OX=36329 GN=PF3D7_0618000 PE=4 SV=1	37C	1	0.974899	0.968658	0.962253	0.959065	0.997181	0.993334	1.05571	1.11456	1.10304	14	54	2	9.73594	0.944319	1.7542
Q8I2W3	Nucleosome assembly protein OS=Plasmodium falciparum (isolate 3D7) OX=36329 GN=PF3D7_0919000 PE=3 SV=1	37C	1	0.953639	0.982858	0.954019	0.956556	0.985514	1.0024	1.11117	1.17126	1.21777	12	108	2	11.2131	0.973322	1.25039
Q8IJN8	Ribonucleoside-diphosphate reductase small chain, putative OS=Plasmodium falciparum (isolate 3D7) OX=36329 GN=PF3D7_1015800 PE=3 SV=2	37C	1	0.984904	1.00346	0.997083	0.984125	0.993827	0.998074	1.02345	1.07308	1.07252	15	61	2	15.2752	0.96699	2.8016
Q8ILW8	Deoxyhypusine synthase OS=Plasmodium falciparum (isolate 3D7) OX=36329 GN=PF3D7_1412600 PE=3 SV=1	37C	1	1.01091	0.999147	0.990722	1.0006	0.991993	0.982263	0.956387	0.983612	0.904992	17	44	2	56.497	0.758388	-0.669419
A0A5K1K9F6	Uncharacterized protein OS=Plasmodium falciparum (isolate 3D7) OX=36329 GN=PF3D7_1345400 PE=4 SV=1	37C	1	0.98507	0.991421	0.971169	0.980666	0.985397	0.981477	0.966897	0.999325	0.960684	22	33	2	0.200234	0.299552	-0.103594
Q8I425	Uncharacterized protein OS=Plasmodium falciparum (isolate 3D7) OX=36329 GN=PF3D7_0507800 PE=4 SV=1	37C	1	0.981829	0.995973	1.00749	0.985811	0.99617	0.989775	0.999821	0.988608	1	31	50	2	1.53766	0.0593298	0.000182188
Q8IEK8	Tetratricopeptide repeat protein, putative OS=Plasmodium falciparum (isolate 3D7) OX=36329 GN=PF3D7_1310800 PE=4 SV=1	37C	1	1.00663	1.01368	1.0255	1.01111	0.995792	1.00069	0.926357	0.912734	0.862625	23	33	2	16.4815	0.951461	-0.930196
C6KSY4	Major facilitator superfamily-related transporter, putative OS=Plasmodium falciparum (isolate 3D7) OX=36329 GN=PF3D7_0614300 PE=4 SV=1	37C	1	1.12878	1.08726	1.14349	1.12157	1.04266	1.06301	1.01422	1.02534	1.03404	21	44	2	0.541992	0.381666	-3.51738
Q8IKC8	Exported protein 2 OS=Plasmodium falciparum (isolate 3D7) OX=36329 GN=PF3D7_1471100 PE=1 SV=1	37C	1	1.04322	1.13744	1.07599	1.15045	1.11793	1.08504	1.20673	1.22676	1.16598	12	60	2	0.119634	0.686275	0.217338
Q8ILZ7	CUGBP Elav-like family member 2, putative OS=Plasmodium falciparum (isolate 3D7) OX=36329 GN=PF3D7_1409800 PE=4 SV=1	37C	1	0.993921	1.00497	0.977658	0.990711	0.993662	0.949491	0.986466	0.971458	0.955782	17	44	2	1.49037	0.519093	-0.348817
Q8I4U7	Uncharacterized protein OS=Plasmodium falciparum (isolate 3D7) OX=36329 GN=PF3D7_1248700 PE=4 SV=1	37C	1	0.974747	0.997329	0.992212	0.984041	0.985535	0.991455	0.988421	0.977049	0.976542	16	38	2	3.63022e+08	0.368705	0.0757136
Q8I257	ELM2 domain-containing protein OS=Plasmodium falciparum (isolate 3D7) OX=36329 GN=PF3D7_0108500 PE=4 SV=1	37C	1	0.957061	0.950448	0.977869	0.951988	0.969074	0.985422	0.990796	0.978098	1.01904	3	44	2	15.8038	0.419261	0.749475
Q8I3A3	Ubiquitinyl hydrolase 1 OS=Plasmodium falciparum (isolate 3D7) OX=36329 GN=PF3D7_0904600 PE=4 SV=1	37C	1	0.981044	0.990438	0.988194	0.991519	0.992778	0.978364	0.975887	0.976674	0.952542	28	42	2	10.0629	0.726959	-0.747434
Q8IID2	Calcium-dependent protein kinase 7 OS=Plasmodium falciparum (isolate 3D7) OX=36329 GN=PF3D7_1123100 PE=3 SV=1	37C	1	1.00916	0.993069	1.00789	0.997046	0.978768	0.991905	0.967564	0.972146	0.990308	44	60	2	0.25113	0.645714	-4.45396
A0A5K1K9E8	Uncharacterized protein OS=Plasmodium falciparum (isolate 3D7) OX=36329 GN=PF3D7_1322200 PE=4 SV=1	37C	1	1.01231	0.98989	0.992784	0.985026	1.01909	1.034	1.04128	1.07287	1.05145	34	47	2	2.28913	0.868894	1.1329
O96259	Uncharacterized protein OS=Plasmodium falciparum (isolate 3D7) OX=36329 GN=PF3D7_0217900 PE=4 SV=1	37C	1	1.00288	0.994122	1.01631	0.997034	1.02349	0.98923	1.01838	1.01647	0.989437	15	82	2	0.0533537	0.0185278	-0.163596
Q8IDX8	Merozoite surface protein 7 OS=Plasmodium falciparum (isolate 3D7) OX=36329 GN=PF3D7_1335100 PE=4 SV=1	37C	1	1.03892	1.03526	1.06415	1.03075	1.02431	1.04441	1.0444	1.03575	1.04558	16	70	2	11178.9	0.588859	-0.00149688
A0A5K1K933	Uncharacterized protein OS=Plasmodium falciparum (isolate 3D7) OX=36329 GN=PF3D7_1366300 PE=4 SV=1	37C	1	1.01048	0.999268	0.986437	1.00723	0.983636	0.982907	0.949353	0.958563	0.947723	29	44	2	2.93227	0.871464	-1.15157
Q8I5Y9	Tetratricopeptide repeat protein, putative OS=Plasmodium falciparum (isolate 3D7) OX=36329 GN=PF3D7_1205600 PE=4 SV=1	37C	1	0.979301	0.986895	0.987468	0.96981	0.998885	0.967767	1.04131	1.09289	1.09232	16	67	2	12.264	0.951193	5.56978
Q8IM73	PRESAN domain-containing protein OS=Plasmodium falciparum (isolate 3D7) OX=36329 GN=PF3D7_1401600 PE=4 SV=2	37C	1	1.05206	1.01783	1.05403	0.999638	1.05398	1.01641	1.08404	1.06405	1.1063	12	31	2	7.44913	0.59168	4.35451
A0A5K1K996	CDT1-like protein, putative OS=Plasmodium falciparum (isolate 3D7) OX=36329 GN=PF3D7_1343300 PE=4 SV=1	37C	1	0.987447	0.982937	0.960459	0.976226	0.993474	0.988143	0.996401	0.994219	0.99469	25	42	2	0.531491	0.264865	2.14343
A0A5K1K859	Alpha/beta-hydrolase, putative OS=Plasmodium falciparum (isolate 3D7) OX=36329 GN=PF3D7_1328500 PE=4 SV=1	37C	1	0.948474	1.00013	0.953256	0.944248	0.94356	0.928368	0.892478	0.872644	0.856055	21	43	2	15.5231	0.899809	-0.304514
Q8I488	Parasite-infected erythrocyte surface protein OS=Plasmodium falciparum (isolate 3D7) OX=36329 GN=PF3D7_0501200 PE=4 SV=1	37C	1	1.19158	1.12382	1.18323	1.17198	1.06769	1.11952	1.10753	1.15778	1.21251	14	89	2	0.000322416	0.53129	0.000173993
O97260	RING finger protein RNF1 OS=Plasmodium falciparum (isolate 3D7) OX=36329 GN=PF3D7_0314700 PE=4 SV=1	37C	1	0.99363	1.01244	0.991893	1.00432	1.01653	0.973304	0.952528	0.954497	0.966466	21	34	2	2.71253	0.873652	-3.8695
Q8I4U3	Uncharacterized protein OS=Plasmodium falciparum (isolate 3D7) OX=36329 GN=PF3D7_1249100 PE=4 SV=1	37C	1	0.99843	1.0318	1.00608	1.03589	0.969319	1.00998	1.00065	1.00782	0.987698	25	61	2	3.43636	0.0850814	-0.513672
Q8I0W8	Deoxyribodipyrimidine photo-lyase, putative OS=Plasmodium falciparum (isolate 3D7) OX=36329 GN=PF3D7_0513600 PE=4 SV=1	37C	1	0.978844	0.9971	0.987719	0.980485	0.984204	1.00003	1.02716	1.05232	1.0293	24	70	2	6.16675	0.874287	2.06494
O77363	Uncharacterized protein OS=Plasmodium falciparum (isolate 3D7) OX=36329 GN=PF3D7_0313000 PE=4 SV=2	37C	1	0.979105	1.0027	0.966558	0.984976	1.00105	0.986215	1.03325	0.992824	1.02275	17	50	2	5.52621	0.448924	7.74644
Q8IL87	Eukaryotic translation initiation factor 2A OS=Plasmodium falciparum (isolate 3D7) OX=36329 GN=PF3D7_1438000 PE=3 SV=1	37C	1	0.970766	0.971502	0.96051	0.962755	0.963239	0.969017	0.968762	0.970984	0.934331	24	45	2	0.154351	0.632763	-0.0843013
Q8IJW6	AP2 domain transcription factor AP2-I OS=Plasmodium falciparum (isolate 3D7) OX=36329 GN=PF3D7_1007700 PE=4 SV=1	37C	1	1.01395	1.02264	0.991981	1.00878	1.01806	0.998545	1.00541	0.978894	0.943745	17	37	2	32.8031	0.79993	-1.73685
Q8I266	Niemann-Pick type C1-related protein OS=Plasmodium falciparum (isolate 3D7) OX=36329 GN=PF3D7_0107500 PE=4 SV=1	37C	1	1.10562	1.02785	1.07807	1.09663	1.05319	1.05247	1.03375	1.09307	1.13765	22	38	2	0.0676843	0.362963	0.0614138
C0H4A7	Histone acetyltransferase OS=Plasmodium falciparum (isolate 3D7) OX=36329 GN=PF3D7_0416400 PE=3 SV=1	37C	1	0.989994	0.99697	0.984554	1.01036	0.994764	1.0164	1.00549	1.03088	0.970639	24	42	2	214514	2.09381e-05	0.00424264
Q8IJS0	Phosphoglucomutase, putative OS=Plasmodium falciparum (isolate 3D7) OX=36329 GN=PF3D7_1012500 PE=3 SV=1	37C	1	0.981371	0.981196	0.95727	0.959227	0.965551	0.945201	0.957821	0.975029	0.944538	19	49	2	0.00726626	0.709927	-0.801889
A0A144A3N9	Actin II OS=Plasmodium falciparum (isolate 3D7) OX=36329 GN=PF3D7_1412500 PE=3 SV=1	37C	1	1.00173	0.996599	0.993301	0.999945	1.01591	0.988575	1.00833	0.972579	0.912338	10	49	2	62.8502	0.933335	-3.49821
C6S3B4	Sugar phosphate phosphatase OS=Plasmodium falciparum (isolate 3D7) OX=36329 GN=PF3D7_0209400 PE=3 SV=1	37C	1	0.983432	0.997196	0.990701	0.980254	0.989432	0.966988	0.936715	0.902677	0.83818	18	67	2	136.936	0.986066	-0.611022
Q8I2J3	M18 aspartyl aminopeptidase OS=Plasmodium falciparum (isolate 3D7) OX=36329 GN=PF3D7_0932300 PE=1 SV=1	37C	1	0.968196	0.991906	0.963477	0.968777	1.02001	1.02923	1.21402	1.29552	1.26719	17	63	2	6.94459	0.981877	2.0692
C6KSM1	ATP-dependent RNA helicase, putative OS=Plasmodium falciparum (isolate 3D7) OX=36329 GN=PF3D7_0602100 PE=4 SV=1	37C	1	1.0661	1.01565	0.99287	1.02332	0.993518	1.00984	0.993371	1.0127	0.997338	30	45	2	0.0120897	0.302944	-2.81993
Q8IL92	Pantothenate kinase 2, putative OS=Plasmodium falciparum (isolate 3D7) OX=36329 GN=PF3D7_1437400 PE=4 SV=1	37C	1	0.995694	0.995453	0.984923	0.991756	1.00105	0.971563	0.956452	0.964488	0.89065	23	54	2	127.193	0.8778	-0.790647
C0H4U0	Uncharacterized protein OS=Plasmodium falciparum (isolate 3D7) OX=36329 GN=PF3D7_0811400 PE=4 SV=1	37C	1	1.0094	1.02308	1.01096	1.00858	1.04164	1.04355	1.09149	1.09837	1.16116	18	36	2	11.69	0.943041	0.657838
Q8IIK8	Peptidyl-prolyl cis-trans isomerase OS=Plasmodium falciparum (isolate 3D7) OX=36329 GN=PF3D7_1115600 PE=3 SV=1	37C	1	0.963674	0.979316	0.979829	0.965968	0.97619	0.975071	1.00275	1.01406	0.984238	11	109	2	6.2612	0.464471	6.83364
Q8I2V6	Pyridoxal phosphate homeostasis protein OS=Plasmodium falciparum (isolate 3D7) OX=36329 GN=PF3D7_0919700 PE=3 SV=1	37C	1	0.950485	0.929955	0.955929	0.900643	0.946058	0.951861	0.968675	0.964753	1.04851	15	46	2	75.2771	0.598652	4.2854
Q8I5N9	DNA-binding chaperone, putative OS=Plasmodium falciparum (isolate 3D7) OX=36329 GN=PF3D7_1216900 PE=4 SV=1	37C	1	1.02317	1.0215	1.03846	1.01433	1.03482	1.02671	1.10442	1.11566	1.18691	24	40	2	22.1719	0.930386	0.863242
Q8IBA0	Receptor for activated c kinase OS=Plasmodium falciparum (isolate 3D7) OX=36329 GN=PF3D7_0826700 PE=4 SV=1	37C	1	0.966988	0.995537	0.994326	0.966695	0.982509	0.972783	0.967501	0.949022	0.897764	13	52	2	53.2624	0.834815	-1.29968
C0H473	HSP20-like chaperone, putative OS=Plasmodium falciparum (isolate 3D7) OX=36329 GN=PF3D7_0314000 PE=4 SV=1	37C	1	1.00908	0.979728	1.00908	0.970973	1.01606	0.976243	0.996212	1.00479	0.997338	15	52	2	0.0201734	0.00859297	4.316e-05
Q8IIJ6	Ubiquitin carboxyl-terminal hydrolase UCH54 OS=Plasmodium falciparum (isolate 3D7) OX=36329 GN=UCH54 PE=1 SV=1	37C	1	0.997174	1.00051	1.01452	1.00777	1.01281	1.02438	1.03579	1.029	1.00357	11	37	2	0.123721	0.539713	0.782786
Q8ILM6	Uncharacterized protein OS=Plasmodium falciparum (isolate 3D7) OX=36329 GN=PF3D7_1422700 PE=4 SV=1	37C	1	1.0217	1.01223	1.01352	1.05099	1.00484	1.03052	0.975232	1.00409	0.968966	21	36	2	5.6874	0.499048	-3.50838
Q8IDM2	CTP:phosphoethanolamine cytidylyltransferase OS=Plasmodium falciparum (isolate 3D7) OX=36329 GN=PF3D7_1347700 PE=3 SV=1	37C	1	1.03403	1.00452	1.03784	1.01513	1.02784	0.97857	0.950194	0.935304	0.913079	14	41	2	5.62265	0.903732	-1.21663
Q8I5V9	Protein phosphatase PPM11, putative OS=Plasmodium falciparum (isolate 3D7) OX=36329 GN=PF3D7_1208900 PE=4 SV=1	37C	1	0.989942	1.00378	0.9887	1.01843	1.00668	1.00559	1.01721	1.02542	1.03309	33	56	2	3.81528	0.708181	0.458836
C0H530	Exportin-7, putative OS=Plasmodium falciparum (isolate 3D7) OX=36329 GN=PF3D7_0910100 PE=3 SV=1	37C	1	1.06154	1.05804	1.06422	1.05586	0.974556	1.03999	0.985628	0.966841	0.95497	22	38	2	3.99675	0.586312	-0.694836
Q8II61	60S acidic ribosomal protein P0 OS=Plasmodium falciparum (isolate 3D7) OX=36329 GN=PF3D7_1130200 PE=3 SV=1	37C	1	1.02179	1.03163	1.04433	1.05112	1.00103	1.04673	1.01387	1.09132	1.02182	14	41	2	1.84544	0.203739	0.0747904
Q8ILU2	Btz domain-containing protein OS=Plasmodium falciparum (isolate 3D7) OX=36329 GN=PF3D7_1415400 PE=3 SV=1	37C	1	1.00218	0.972715	0.976455	0.986448	0.991629	0.981033	0.966352	0.982445	0.932007	32	51	2	29.5196	0.562878	-0.795518
Q8IBD1	Sporozoite and liver stage tryptophan-rich protein, putative OS=Plasmodium falciparum (isolate 3D7) OX=36329 GN=PF3D7_0830500 PE=4 SV=1	37C	1	1.04312	1.04132	1.0734	1.03176	1.02049	1.04673	1.04403	1.06495	1.11067	28	54	2	0.358417	0.474412	0.131613
Q8IES0	Small heat shock protein, putative OS=Plasmodium falciparum (isolate 3D7) OX=36329 GN=PF3D7_1304500 PE=3 SV=1	37C	1	1.00874	0.997189	0.998249	0.992182	1.00386	0.989756	1.00474	1.01256	1.02836	11	68	2	24.5311	0.711728	1.56339
O77321	DNA polymerase delta small subunit, putative OS=Plasmodium falciparum (isolate 3D7) OX=36329 GN=PF3D7_0308000 PE=3 SV=1	37C	1	1.00099	1.02776	1.03763	1.00893	1.01748	1.02347	0.993322	0.960182	0.949324	14	39	2	15.3188	0.829698	-2.68606
Q8ILT0	Glutamate dehydrogenase OS=Plasmodium falciparum (isolate 3D7) OX=36329 GN=PF3D7_1416500 PE=3 SV=1	37C	1	1.04388	0.936752	1.026	0.920103	1.04432	1.2493	1.29271	1.44215	1.759	17	31	2	48.0977	0.947473	0.599863
Q8ILI9	DNA mismatch repair protein MSH2, putative OS=Plasmodium falciparum (isolate 3D7) OX=36329 GN=PF3D7_1427500 PE=4 SV=1	37C	1	0.999057	1.01185	1.02115	1.02425	1.01466	1.02263	0.986821	0.970376	0.920557	22	34	2	72.3281	0.902181	-1.11506
Q8ILK2	Nascent polypeptide-associated complex subunit beta OS=Plasmodium falciparum (isolate 3D7) OX=36329 GN=PF3D7_1426100 PE=3 SV=1	37C	1	0.977816	1.00295	0.984117	0.986642	0.995934	0.974001	0.996899	0.982328	0.987698	9	43	2	0.384556	0.16429	-0.0184649
Q8I303	BSD-domain protein, putative OS=Plasmodium falciparum (isolate 3D7) OX=36329 GN=PF3D7_0914900 PE=4 SV=1	37C	1	0.965948	1.01465	0.985163	0.990506	0.985935	0.991297	0.970133	0.946787	0.929694	28	43	2	19.245	0.764132	-1.47907
O97240	DNA-(apurinic or apyrimidinic site) endonuclease OS=Plasmodium falciparum (isolate 3D7) OX=36329 GN=PF3D7_0305600 PE=3 SV=2	37C	1	1.01399	0.983704	1.00895	0.997519	1.03307	1.01551	1.06412	1.05711	1.09232	18	31	2	8.54225	0.851159	0.636704
Q8I1V0	Lysine decarboxylase-like protein, putative OS=Plasmodium falciparum (isolate 3D7) OX=36329 GN=PF3D7_0413700 PE=4 SV=1	37C	1	0.985494	0.959094	0.964477	0.964559	0.980265	0.951806	0.938006	0.975052	0.925865	12	37	2	1.17317	0.558596	-0.153563
Q8IB60	Protein transport protein SEC23 OS=Plasmodium falciparum (isolate 3D7) OX=36329 GN=pfsec23 PE=2 SV=1	37C	1	1.0276	1.02032	1.04235	1.01519	1.02027	1.02688	1.012	0.972243	0.93823	22	36	2	36.8841	0.87774	-1.86846
A0A143ZZG2	40S ribosomal protein SA OS=Plasmodium falciparum (isolate 3D7) OX=36329 GN=PF3D7_1026800 PE=3 SV=1	37C	1	1	0.996357	1.01076	0.987233	1.00921	1.02662	1.09908	1.14435	1.15638	14	53	2	8.78933	0.99115	1.45589
Q8II79	Bifunctional farnesyl/geranylgeranyl diphosphate synthase OS=Plasmodium falciparum (isolate 3D7) OX=36329 GN=PF3D7_1128400 PE=3 SV=2	37C	1	0.973837	0.978018	0.971982	0.951219	0.985569	0.959347	0.978369	0.966137	0.891356	15	49	2	67.3973	0.796837	-7.19521
C6KSW2	Uncharacterized protein OS=Plasmodium falciparum (isolate 3D7) OX=36329 GN=PF3D7_0611800 PE=4 SV=1	37C	1	0.97842	0.991653	0.968115	0.971005	0.965806	0.980897	0.975623	0.967562	0.99469	28	40	2	2.78592e+30	0.35042	1.17266e-05
Q8I467	Cofilin/actin-depolymerizing factor homolog 1 OS=Plasmodium falciparum (isolate 3D7) OX=36329 GN=PFE0165w PE=1 SV=1	37C	1	0.94962	0.979574	0.958023	0.952935	0.953664	0.92491	0.846491	0.771107	0.640456	4	95	2	110.935	0.984171	-0.614836
O97313	40S ribosomal protein S3a OS=Plasmodium falciparum (isolate 3D7) OX=36329 GN=MAL3P7.35 PE=1 SV=1	37C	1	1.06421	1.07783	1.07966	1.09291	1.07657	1.09055	1.0748	1.04846	0.995571	16	44	2	72.2196	0.450134	-2.55171
Q8ILG1	Acid phosphatase, putative OS=Plasmodium falciparum (isolate 3D7) OX=36329 GN=PF3D7_1430300 PE=3 SV=1	37C	1	0.998672	1.00898	1.00576	1.0028	1.01602	1.00584	1.02466	0.983155	1.01904	30	37	2		0.0558901	-4.42757e-05
C0H490	Cytosolic glyoxalase II OS=Plasmodium falciparum (isolate 3D7) OX=36329 GN=PF3D7_0406400 PE=3 SV=1	37C	1	0.973344	0.98043	0.995468	0.966551	0.976219	0.99316	0.995002	1.01183	0.950931	12	49	2	10.0676	0.0928705	-3.00688e-05
Q8IL42	Protein transport protein SEC7, putative OS=Plasmodium falciparum (isolate 3D7) OX=36329 GN=PF3D7_1442900 PE=4 SV=1	37C	1	1.04243	1.01666	1.03412	1.05954	0.98454	1.00777	0.995608	1.0119	1.07766	24	33	2	2.91644	0.0738205	0.000262029
Q8ILJ7	Phosphoenolpyruvate carboxylase OS=Plasmodium falciparum (isolate 3D7) OX=36329 GN=PF3D7_1426700 PE=4 SV=1	37C	1	1.03325	1.01665	1.01306	1.03451	1.00255	1.01929	0.994983	0.957319	0.916803	23	42	2	40.431	0.905431	-1.27417
Q8IIW0	Chromatin remodeling protein OS=Plasmodium falciparum (isolate 3D7) OX=36329 GN=PF3D7_1104200 PE=4 SV=1	37C	1	0.996977	1.00191	0.995578	1.02377	1.00454	1.02635	1.0392	1.04554	1.05441	27	42	2	4.55747	0.896397	0.547345
Q8I3U1	Ubiquitin carboxyl-terminal hydrolase 2, putative OS=Plasmodium falciparum (isolate 3D7) OX=36329 GN=PF3D7_0516700 PE=4 SV=1	37C	1	1.01076	0.99759	0.99199	1.0033	1.00343	0.987452	0.950206	0.946758	0.919804	31	49	2	9.75784	0.943293	-1.12228
Q8I3Y4	Glutathione synthetase OS=Plasmodium falciparum (isolate 3D7) OX=36329 GN=PF3D7_0512200 PE=3 SV=1	37C	1	0.961154	0.969211	0.952075	0.940686	0.99394	0.973325	1.05493	1.07815	1.07973	20	48	2	8.21925	0.888545	2.96191
Q8IJW2	Zinc finger protein, putative OS=Plasmodium falciparum (isolate 3D7) OX=36329 GN=PF3D7_1008100 PE=4 SV=1	37C	1	0.990128	0.978961	0.968121	0.991895	0.983104	0.967261	0.996338	1.01388	0.995571	25	38	2	11.2097	0.428825	3.77539
A0A5K1K870	Ribosome-interacting GTPase 1, putative OS=Plasmodium falciparum (isolate 3D7) OX=36329 GN=PF3D7_0524400 PE=4 SV=1	37C	1	0.991835	1.01065	1.01172	0.989304	0.99789	0.998903	1.01885	0.995663	0.999111	12	39	2	5.31809	0.00390589	0.0936945
Q8IL80	Thioredoxin peroxidase 1 OS=Plasmodium falciparum (isolate 3D7) OX=36329 GN=PF3D7_1438900 PE=3 SV=1	37C	1	0.978068	1.02225	1.01045	0.981663	0.987641	0.967972	0.960594	0.954056	0.870643	10	36	2	88.958	0.841135	-0.789509
Q8IJW0	26S protease regulatory subunit 4, putative OS=Plasmodium falciparum (isolate 3D7) OX=36329 GN=PF3D7_1008400 PE=3 SV=2	37C	1	1.08217	1.07019	1.07781	1.07901	1.03915	1.0677	1.04462	1.01166	0.952542	12	37	2	57.6805	0.668813	-1.62798
A0A144A4E0	Thioredoxin OS=Plasmodium falciparum (isolate 3D7) OX=36329 GN=PF3D7_1457200 PE=3 SV=1	37C	1	0.944459	0.998135	0.958642	0.964996	0.973431	0.984648	1.02676	1.03825	1.03978	5	91	2	5.68317	0.759757	2.2968
Q8IAU1	ATP-dependent RNA helicase DBP1, putative OS=Plasmodium falciparum (isolate 3D7) OX=36329 GN=PF3D7_0810600 PE=4 SV=1	37C	1	0.997662	0.982068	0.995088	0.990656	0.999315	0.996251	1.02771	1.03937	1.06743	14	44	2	25.1627	0.942344	0.927116
Q8I2V9	Protein disulfide isomerase OS=Plasmodium falciparum (isolate 3D7) OX=36329 GN=PF3D7_0919400 PE=4 SV=1	37C	1	0.928844	0.995653	0.952483	0.944614	0.959919	0.93718	0.941625	0.939649	0.93823	12	62	2	1.33325e+12	0.511248	0.0493262
Q8IDH2	Vacuolar fusion protein MON1, putative OS=Plasmodium falciparum (isolate 3D7) OX=36329 GN=PF3D7_1352800 PE=4 SV=1	37C	1	1.00742	0.976504	0.956771	0.980401	0.996421	0.955815	1.00475	1.02295	1.06138	20	38	2	46.6276	0.691973	1.41542
Q8IBP0	Uncharacterized protein OS=Plasmodium falciparum (isolate 3D7) OX=36329 GN=PF3D7_0721100 PE=4 SV=1	37C	1	0.979392	0.992794	0.984828	0.990202	1.00692	0.998427	1.04983	1.09632	1.14577	11	63	2	34.0155	0.980629	0.898735
Q8I3U4	Phosducin-like protein 1, putative OS=Plasmodium falciparum (isolate 3D7) OX=36329 GN=PF3D7_0516400 PE=3 SV=1	37C	1	0.999615	1.01203	0.985691	1.00189	0.967311	0.9938	0.997633	1.00854	1.01812	16	37	2	9.22939	0.26492	2.03629
Q8IC44	Sporozoite threonine and asparagine-rich protein OS=Plasmodium falciparum (isolate 3D7) OX=36329 GN=PF3D7_0702300 PE=4 SV=1	37C	1	1.11807	1.05177	1.0893	1.10644	1.03781	1.08215	1.03923	1.08313	1.09232	15	47	2	61.938	0.452158	-0.000131282
Q8I1V1	26S protease regulatory subunit 6B, putative OS=Plasmodium falciparum (isolate 3D7) OX=36329 GN=PF3D7_0413600 PE=3 SV=1	37C	1	1.07718	1.06081	1.05041	1.07599	1.00197	1.03304	1.00189	1.0113	0.955782	15	44	2	7.06422	0.512748	-0.665902
Q8IJI7	2-deoxy-D-ribose 5-phosphate aldolase OS=Plasmodium falciparum (isolate 3D7) OX=36329 GN=PF3D7_1021600 PE=3 SV=1	37C	1	0.999676	1.001	1.03452	0.992953	1.01991	0.998896	0.979771	0.963271	0.930464	14	45	2	28.7739	0.815962	-1.02286
C6KTA3	ATPase OS=Plasmodium falciparum (isolate 3D7) OX=36329 GN=PF3D7_0626700 PE=3 SV=1	37C	1	0.951211	1.00385	0.988085	0.968169	0.981435	0.974729	0.980936	1.00038	1.00988	14	47	2	17.9179	0.308997	8.11941
C6KTB4	Acetyl-CoA synthetase, putative OS=Plasmodium falciparum (isolate 3D7) OX=36329 GN=PF3D7_0627800 PE=3 SV=1	37C	1	1.04578	1.01113	1.03133	1.05091	0.983235	1.01293	0.95316	0.927507	0.889945	22	42	2	16.4599	0.857284	-0.852334
Q8I501	Rab GDP dissociation inhibitor OS=Plasmodium falciparum (isolate 3D7) OX=36329 GN=PF3D7_1242800 PE=1 SV=1	37C	1	0.968862	0.98557	0.997989	0.983968	0.973163	0.980347	0.929801	0.917004	0.893482	14	54	2	10.1762	0.917315	-1.32123
A0A143ZXR3	Actin-like protein, putative OS=Plasmodium falciparum (isolate 3D7) OX=36329 GN=PF3D7_1110700 PE=3 SV=1	37C	1	0.980213	0.964582	0.969449	0.957379	0.995247	0.967136	1.00669	0.989072	0.951736	12	31	2	0.00662904	0.164611	-5.21799e-05
Q8I5X5	Uncharacterized protein OS=Plasmodium falciparum (isolate 3D7) OX=36329 GN=PF3D7_1207000 PE=4 SV=1	37C	1	0.986515	1.00106	0.981112	0.996995	1.00998	0.982259	1.01627	1.01746	1.05243	34	42	2	41.2405	0.752741	1.10995
Q8I312	Pseudouridylate synthase, putative OS=Plasmodium falciparum (isolate 3D7) OX=36329 GN=PF3D7_0914000 PE=4 SV=1	37C	1	0.982031	0.980032	0.967265	0.992757	0.991745	1.01803	0.982234	1.0347	0.99469	24	37	2	0.925963	0.340122	3.93523
Q8I5X8	Eukaryotic translation initiation factor 5, putative OS=Plasmodium falciparum (isolate 3D7) OX=36329 GN=PF3D7_1206700 PE=3 SV=1	37C	1	1.00778	1.01901	1.00629	1.02287	1.02545	0.984968	1.00849	1.05527	1.03119	17	50	2	2.38894	0.230021	0.230727
Q8I2N3	RNA-binding protein, putative OS=Plasmodium falciparum (isolate 3D7) OX=36329 GN=PF3D7_0927600 PE=3 SV=1	37C	1	0.97963	0.986684	0.986049	0.992223	0.998598	1.00277	1.02506	1.03362	1.03309	19	47	2	4.55423	0.924319	1.09473
Q8IJT1	Proteasome subunit beta OS=Plasmodium falciparum (isolate 3D7) OX=36329 GN=PF3D7_1011400 PE=1 SV=1	37C	1	1.0482	1.01607	1.0601	1.04205	1.0338	1.01615	1.01096	1.02194	1.00447	9	34	2	1.99762	0.267305	-1.96454
Q8IE20	Elongation factor Tu OS=Plasmodium falciparum (isolate 3D7) OX=36329 GN=PF3D7_1330600 PE=3 SV=1	37C	1	1.02728	1.04112	1.07206	1.04956	1.02014	1.07413	1.0509	1.02327	1.0117	15	32	2	52212.6	0.272715	-3.59775e-05
A0A5K1K963	Chaperone binding protein, putative OS=Plasmodium falciparum (isolate 3D7) OX=36329 GN=PF3D7_1334200 PE=4 SV=1	37C	1	1.01712	1.01974	1.03655	0.999482	1.02563	1.02158	1.02989	1.03039	1.03499	15	49	2	0.00467753	0.455954	0.136507
Q8IAM2	1-cys peroxiredoxin OS=Plasmodium falciparum (isolate 3D7) OX=36329 GN=PF3D7_0802200 PE=3 SV=1	37C	1	0.969704	1.00529	0.995027	0.978784	0.975588	0.970765	0.950954	0.924997	0.838806	14	89	2	121.763	0.940859	-0.846878
Q8I2R8	Polyadenylate-binding protein 2, putative OS=Plasmodium falciparum (isolate 3D7) OX=36329 GN=PF3D7_0923900 PE=4 SV=1	37C	1	0.960843	0.998102	1.01221	0.960596	1.02487	1.02449	1.08643	1.08445	1.12288	8	41	2	6.03372	0.865372	0.842386
Q8I377	ATP-dependent protease ATPase subunit ClpY OS=Plasmodium falciparum (isolate 3D7) OX=36329 GN=PF3D7_0907400 PE=3 SV=1	37C	1	1.03394	1.0353	1.0188	1.0256	1.0259	1.03551	1.08502	1.11456	1.10196	29	48	2	6.66112	0.928966	2.04138
Q8IIW9	FeS cluster assembly protein SufD OS=Plasmodium falciparum (isolate 3D7) OX=36329 GN=PF3D7_1103400 PE=4 SV=1	37C	1	0.946907	0.959205	0.96843	0.945154	0.926384	0.934176	0.892437	0.895281	0.925103	23	38	2	0.117001	0.782288	-0.232536
Q8IIG2	tRNA nucleotidyltransferase, putative OS=Plasmodium falciparum (isolate 3D7) OX=36329 GN=PF3D7_1120500 PE=3 SV=1	37C	1	0.991275	0.990132	1.00053	0.986752	1.00185	1.00584	1.03047	1.05699	1.01904	21	45	2	5.06273	0.779553	2.04301
Q8IAZ5	Vacuolar protein sorting-associated protein 9, putative OS=Plasmodium falciparum (isolate 3D7) OX=36329 GN=PF3D7_0815800 PE=4 SV=1	37C	1	1.01904	0.975844	0.979222	0.990166	0.983981	0.988957	1	0.990926	0.997338	25	41	2		0.0183502	-2.67528e-05
Q8IBV2	Transcription elongation factor s-II, putative OS=Plasmodium falciparum (isolate 3D7) OX=36329 GN=PF3D7_0714500 PE=4 SV=1	37C	1	0.992679	1.00051	1.01447	0.994061	1.00586	1.01592	1.02002	1.04779	1.03594	17	49	2	6.88583	0.828867	1.05178
O77323	T-complex protein 1 subunit eta OS=Plasmodium falciparum (isolate 3D7) OX=36329 GN=MAL3P3.6 PE=3 SV=1	37C	1	1.0021	1.02981	1.03301	0.997672	1.00674	1.03383	1.03382	1.01909	1.03499	14	42	2	0.119382	0.312953	0.17263
Q8I333	Falstatin OS=Plasmodium falciparum (isolate 3D7) OX=36329 GN=PF3D7_0911900 PE=4 SV=1	37C	1	1.00146	0.992333	0.987851	1.00185	1.01751	0.971365	0.993569	0.976081	0.969802	11	30	2	1.79703	0.567589	-5.19113
A0A5K1K956	Histone-arginine methyltransferase CARM1, putative OS=Plasmodium falciparum (isolate 3D7) OX=36329 GN=PF3D7_0811500 PE=4 SV=1	37C	1	0.998749	0.992486	0.990835	0.996509	0.992933	1.00313	0.975647	0.998751	1.01536	24	39	2	52.0509	0.434573	4.34332
Q8IIM5	Glyoxalase I OS=Plasmodium falciparum (isolate 3D7) OX=36329 GN=PF3D7_1113700 PE=4 SV=1	37C	1	0.977563	0.977537	0.968572	0.968332	1.00749	0.984808	1.04909	1.10723	1.06138	16	64	2	11.1037	0.878228	5.2749
Q8IKR1	H(+)-exporting diphosphatase OS=Plasmodium falciparum (isolate 3D7) OX=36329 GN=PF3D7_1456800 PE=3 SV=1	37C	1	1.27309	1.17657	1.29198	1.25455	1.06258	1.16998	1.04635	1.07889	1.15757	11	35	2	0.403241	0.242003	-5.09511
Q8I433	RHOMBOID-like protein OS=Plasmodium falciparum (isolate 3D7) OX=36329 GN=PF3D7_0506900 PE=3 SV=1	37C	1	0.989391	0.997033	0.973384	0.987936	0.999702	1.02841	1.04558	1.07577	1.08599	15	38	2	7.43963	0.957889	0.891738
Q8IBL4	RNA-binding protein, putative OS=Plasmodium falciparum (isolate 3D7) OX=36329 GN=PF3D7_0723900 PE=4 SV=1	37C	1	0.950922	0.999227	0.976568	0.978258	0.947661	0.971309	0.962919	0.936706	0.939014	21	35	2	2.44758	0.538814	-0.192387
Q8I484	Rhoptry-associated protein 2 OS=Plasmodium falciparum (isolate 3D7) OX=36329 GN=PF3D7_0501600 PE=4 SV=1	37C	1	1.11342	1.04862	1.06312	1.0813	1.02082	1.11727	1.09984	1.24177	1.1446	16	50	2	6.91287	0.591179	1.35895
Q8IM15	Plasmepsin III OS=Plasmodium falciparum (isolate 3D7) OX=36329 GN=PMIII PE=1 SV=1	37C	1	0.949063	0.99322	0.966198	0.964023	0.958002	0.95668	0.9379	0.933182	0.952542	15	75	2	0.13231	0.623267	-0.160157
Q8I413	Structural maintenance of chromosomes protein 4 OS=Plasmodium falciparum (isolate 3D7) OX=36329 GN=PF3D7_0509100 PE=3 SV=1	37C	1	0.997395	0.996581	0.986808	1.00231	0.980501	0.997223	0.975704	1.00518	0.993811	31	39	2		0.00580807	-1.1611e-05
Q8I0U7	Proteasome subunit beta type-6, putative OS=Plasmodium falciparum (isolate 3D7) OX=36329 GN=PF3D7_0931800 PE=1 SV=1	37C	1	1.00318	1.01952	0.992078	1.0053	0.999021	1.00222	1.02754	1.03942	0.972318	8	65	2	3.5849	0.012332	-0.0508474
Q8ILB8	Methionine aminopeptidase 2 OS=Plasmodium falciparum (isolate 3D7) OX=36329 GN=PF3D7_1434600 PE=3 SV=1	37C	1	1.00542	1.00709	1.01512	0.981321	1.01876	1.00793	1.05407	1.03733	1.06641	15	41	2	5.52196	0.78321	4.22233
Q8II82	Prefoldin subunit 5, putative OS=Plasmodium falciparum (isolate 3D7) OX=36329 GN=PF3D7_1128100 PE=4 SV=1	37C	1	1.00494	1.011	1.01037	0.98914	1.00832	1.00664	0.995224	0.982474	0.972318	14	43	2	17.2152	0.750871	-1.89683
Q8IB31	Ubiquitin-like domain-containing protein OS=Plasmodium falciparum (isolate 3D7) OX=36329 GN=PF3D7_0819600 PE=4 SV=1	37C	1	1.10621	1.06249	1.09937	1.09926	0.997706	1.06314	0.984489	1.00655	0.990308	12	32	2	1.00533	0.407467	-1.19676
Q8I2N6	Fumarate hydratase OS=Plasmodium falciparum (isolate 3D7) OX=36329 GN=PF3D7_0927300 PE=3 SV=1	37C	1	0.978275	0.997447	0.968673	1.01415	0.987024	0.986882	0.97459	0.97988	0.956596	20	34	2	8.98403	0.373671	-0.985254
O97303	U4/U6.U5 tri-snRNP-associated protein 1, putative OS=Plasmodium falciparum (isolate 3D7) OX=36329 GN=PF3D7_0323700 PE=3 SV=1	37C	1	1.00059	1.01436	1.00418	1.00744	1.02618	1.00599	1.0318	1.0278	1.06641	18	32	2	17.0999	0.751551	0.648058
Q8IIM8	Ubiquitin domain-containing protein DSK2, putative OS=Plasmodium falciparum (isolate 3D7) OX=36329 GN=PF3D7_1113400 PE=1 SV=1	37C	1	0.935538	1.01139	0.965143	0.974364	1.01309	1.0153	1.10873	1.03446	1.12064	7	35	2	3.05557	0.700513	1.26981
Q8I1Y0	Merozoite surface protein P41 OS=Plasmodium falciparum (isolate 3D7) OX=36329 GN=PF41 PE=1 SV=1	37C	1	1.00261	1.01741	1.00659	0.983946	0.974028	0.977627	0.937024	0.909757	0.867954	12	32	2	64.546	0.968746	-0.492047
Q8IJF6	Exported protein 3 OS=Plasmodium falciparum (isolate 3D7) OX=36329 GN=PF3D7_1024800 PE=4 SV=2	37C	1	0.982368	0.988119	0.980311	0.97877	0.971779	0.975649	0.969429	1.0084	1.00988	23	38	2	33.6556	0.658129	6.5169
Q8IM38	Ribonucleoside-diphosphate reductase small chain, putative OS=Plasmodium falciparum (isolate 3D7) OX=36329 GN=PF3D7_1405600 PE=3 SV=1	37C	1	0.964274	0.996048	0.986696	0.965011	0.982206	0.988329	1.01369	0.988968	0.989437	10	56	2	3.33931	0.222565	3.37475
Q8I3N3	Mitochondrial-processing peptidase subunit alpha, putative OS=Plasmodium falciparum (isolate 3D7) OX=36329 GN=PF3D7_0523100 PE=4 SV=2	37C	1	1.0254	1.00051	1.01882	0.99811	1.01892	1.0189	1.04437	1.04593	1.00357	15	39	2	1.60724	0.316041	1.67099
Q8I6U4	Cysteine proteinase falcipain 2a OS=Plasmodium falciparum (isolate 3D7) OX=36329 GN=PF3D7_1115700 PE=1 SV=1	37C	1	0.996904	1.00056	1.01521	1.0031	1.00292	0.983611	0.951701	0.909731	0.875389	10	46	2	24.3234	0.98762	-0.935419
Q8ILY9	Protein-synthesizing GTPase OS=Plasmodium falciparum (isolate 3D7) OX=36329 GN=PF3D7_1410600 PE=4 SV=1	37C	1	1.00168	1.00008	1.03589	0.989892	1.02036	1.00078	0.98262	0.96348	0.958227	13	45	2	5.2028	0.671244	-1.81548
Q8I3C0	Serine repeat antigen 9 OS=Plasmodium falciparum (isolate 3D7) OX=36329 GN=PF3D7_0902800 PE=3 SV=1	37C	1	0.996838	0.996992	0.991955	0.987311	0.995898	0.999425	0.976806	0.974329	0.942953	23	34	2	54.9202	0.897165	-1.04377
A0A5K1K931	6-cysteine protein OS=Plasmodium falciparum (isolate 3D7) OX=36329 GN=PF3D7_1364100 PE=4 SV=1	37C	1	1.08336	1.04956	1.0653	1.07363	1.01533	1.04439	0.97542	0.986417	0.957411	18	33	2	6.31448	0.658767	-3.47223
Q8IL16	Uncharacterized protein OS=Plasmodium falciparum (isolate 3D7) OX=36329 GN=PF3D7_1445700 PE=4 SV=1	37C	1	0.985235	1.01983	1.00583	0.993409	1.01399	1.01766	1.05311	1.04395	1.06238	23	59	2	4.36326	0.836232	1.55511
Q8I2Y5	RNA-binding protein musashi, putative OS=Plasmodium falciparum (isolate 3D7) OX=36329 GN=PF3D7_0916700 PE=4 SV=1	37C	1	1.00739	1.02315	1.01706	1.00047	1.01482	0.976699	0.97908	0.978407	0.987698	19	77	2	1.64215	0.804042	-5.76372
Q8I2G2	Cytoadherence linked asexual protein 9 OS=Plasmodium falciparum (isolate 3D7) OX=36329 GN=PF3D7_0935800 PE=4 SV=1	37C	1	1.08884	1.06307	1.06284	1.07767	1.02632	1.05755	1.03271	1.07638	1.06946	26	44	2	112.926	0.502605	-0.000168617
Q8IIK7	Uncharacterized protein OS=Plasmodium falciparum (isolate 3D7) OX=36329 GN=PF3D7_1115800 PE=4 SV=1	37C	1	0.994619	1.0052	1.01954	0.99295	1.01003	1.01533	1.0418	1.0514	1.11619	13	65	2	91.2151	0.932682	0.787505
Q8IAX8	DNA/RNA-binding protein Alba 1 OS=Plasmodium falciparum (isolate 3D7) OX=36329 GN=PF3D7_0814200 PE=4 SV=1	37C	1	1.02093	1.02071	1.02409	1.03685	1.03133	1.03943	1.04539	1.10805	1.09552	13	81	2	3.966	0.82366	0.471425
Q8IKC9	Proteasome subunit beta OS=Plasmodium falciparum (isolate 3D7) OX=36329 GN=PF3D7_1470900 PE=1 SV=2	37C	1	0.979209	0.997984	0.980113	0.975174	0.965898	0.966746	0.958511	0.992909	0.916055	13	62	2	11.9162	0.473226	-0.237949
Q8ID43	Nucleoside diphosphate kinase OS=Plasmodium falciparum (isolate 3D7) OX=36329 GN=PF3D7_1366500 PE=1 SV=1	37C	1	0.996316	1.01827	1.03295	0.996058	1.03313	1.02656	1.09518	1.11791	1.13192	11	54	2	7.81335	0.933173	1.63198
Q8I280	V-type proton ATPase subunit C OS=Plasmodium falciparum (isolate 3D7) OX=36329 GN=PF3D7_0106100 PE=3 SV=1	37C	1	1.0052	1.01028	1.00647	0.994733	1.00617	1.01422	1.03349	1.05217	1.01536	19	39	2	3.95935	0.680274	2.16985
Q8IAW0	Importin subunit alpha OS=Plasmodium falciparum (isolate 3D7) OX=36329 GN=PF3D7_0812400 PE=3 SV=1	37C	1	0.988265	1.02731	1.02699	0.99889	0.985715	1.03527	1.00473	0.985977	0.997338	10	27	2	0.000594635	0.000179318	-0.119709
Q8I3T8	60S ribosomal protein L12, putative OS=Plasmodium falciparum (isolate 3D7) OX=36329 GN=PF3D7_0517000 PE=3 SV=2	37C	1	0.98888	1.02315	1.03173	0.999371	1.01162	1.00999	0.986424	0.98986	0.925103	10	25	2	48.2006	0.724925	-1.24587
Q8IKL8	MORN repeat protein, putative OS=Plasmodium falciparum (isolate 3D7) OX=36329 GN=PF3D7_1461400 PE=4 SV=2	37C	1	1.03128	0.995828	1.01283	0.986169	1.00273	1.01829	1.06184	1.12017	1.1365	15	38	2	14.8799	0.950782	1.52554
Q8IJZ3	RNA-binding protein, putative OS=Plasmodium falciparum (isolate 3D7) OX=36329 GN=PF3D7_1004400 PE=4 SV=1	37C	1	0.991481	0.990882	0.988998	0.990266	0.991117	0.970035	0.988465	1.02528	1.0117	19	30	2	21.0152	0.702146	6.31323
C6KSM4	Elongation factor G OS=Plasmodium falciparum (isolate 3D7) OX=36329 GN=PF3D7_0602400 PE=3 SV=1	37C	1	0.978591	0.976987	0.986425	0.980529	0.997291	0.981974	1.0182	1.02922	1.01261	21	28	2	7.40081	0.788045	4.12095
Q8II60	26S protease regulatory subunit 6A, putative OS=Plasmodium falciparum (isolate 3D7) OX=36329 GN=PF3D7_1130400 PE=3 SV=1	37C	1	1.01371	1.01964	1.01515	1.03225	1.01087	1.05056	1.07267	1.12475	1.1446	18	43	2	11.2138	0.963613	0.961164
Q8I3M2	Uncharacterized protein OS=Plasmodium falciparum (isolate 3D7) OX=36329 GN=PF3D7_0524300 PE=4 SV=1	37C	1	1.00294	0.98994	1.00314	0.999573	1.03585	1.01968	1.02573	1.02888	1.04074	17	36	2	0.333992	0.854771	4.15929
Q8I6T0	Aminomethyltransferase, mitochondrial, putative OS=Plasmodium falciparum (isolate 3D7) OX=36329 GN=PF3D7_1365500 PE=3 SV=1	37C	1	0.967327	0.988664	0.976186	0.967247	0.974886	0.959358	0.923312	0.892856	0.828298	14	32	2	45.9106	0.961453	-0.740414
O97284	Nicotinamidase, putative OS=Plasmodium falciparum (isolate 3D7) OX=36329 GN=PF3D7_0320500 PE=3 SV=1	37C	1	0.984856	0.981379	0.988865	0.988823	1.02586	0.999157	0.999058	1.00144	0.920557	14	54	2	131.583	0.788352	-5.79808
Q8IBT7	Uncharacterized protein OS=Plasmodium falciparum (isolate 3D7) OX=36329 GN=PF3D7_0716300 PE=4 SV=1	37C	1	1.01287	1.00137	1.02629	1.01897	1.03801	1.01814	1.00897	0.982243	0.974003	16	39	2	9.29559	0.592868	-1.82979
Q8ILS4	NOT family protein, putative OS=Plasmodium falciparum (isolate 3D7) OX=36329 GN=PF3D7_1417200 PE=4 SV=1	37C	1	1.01438	1.01766	1.03388	1.02756	0.977046	1.00833	0.921061	0.896868	0.874708	26	48	2	8.83075	0.922865	-2.40192
Q8IBZ6	Mediator of RNA polymerase II transcription subunit 14 OS=Plasmodium falciparum (isolate 3D7) OX=36329 GN=PF3D7_0709300 PE=3 SV=1	37C	1	1.04327	1.01521	0.992093	1.02726	0.993136	1.01972	0.99205	1.03604	1.02836	21	31	2	0.0355747	0.0718619	-0.000214862
Q8IHP7	Uncharacterized protein OS=Plasmodium falciparum (isolate 3D7) OX=36329 GN=PF3D7_1147300 PE=4 SV=1	37C	1	0.983418	0.972927	0.986497	0.988339	0.988992	0.99665	0.998261	0.999708	0.981659	18	27	2	0.5191	0.183298	1.62286
C0H535	SAP domain-containing protein, putative OS=Plasmodium falciparum (isolate 3D7) OX=36329 GN=PF3D7_0912500 PE=4 SV=1	37C	1	0.985191	1.00563	0.987865	0.995861	1.02203	1.00839	1.03186	1.04683	1.03499	13	28	2	2.58504	0.807199	0.751351
Q8ILS7	Prefoldin subunit 2, putative OS=Plasmodium falciparum (isolate 3D7) OX=36329 GN=PF3D7_1416900 PE=3 SV=1	37C	1	0.93329	0.982937	0.974921	0.971005	0.974452	0.989048	0.986012	0.999156	0.99469	9	38	2	2.17952	0.269814	3.56862
Q8IJF2	Uncharacterized protein OS=Plasmodium falciparum (isolate 3D7) OX=36329 GN=PF3D7_1025300 PE=4 SV=2	37C	1	1.04036	1.04214	1.05936	1.06473	1.0497	1.05469	1.05096	1.04653	1.0715	23	40	2	0.00106398	0.834569	0.724679
Q8IC43	Small exported membrane protein 1 OS=Plasmodium falciparum (isolate 3D7) OX=36329 GN=PF3D7_0702400 PE=4 SV=1	37C	1	1.14012	1.10888	1.16519	1.14134	1.02009	1.09897	1.04646	1.07108	1.15164	6	80	2	245.113	0.326204	-8.35034e-05
Q8II45	Ubiquitin-like protein, putative OS=Plasmodium falciparum (isolate 3D7) OX=36329 GN=PF3D7_1132000 PE=4 SV=1	37C	1	1.00721	1.01965	1.03089	1.01509	1.00712	0.995367	0.989989	0.914246	0.935108	22	42	2	16.7388	0.91097	-3.77694
Q8IBV0	4-nitrophenylphosphatase OS=Plasmodium falciparum (isolate 3D7) OX=36329 GN=PF3D7_0715000 PE=4 SV=1	37C	1	0.997656	0.996829	0.995238	0.985665	0.991825	0.984763	0.98652	0.99753	0.944538	13	30	2	120.881	0.883746	-7.05989
Q8I3Q8	Mediator of RNA polymerase II transcription subunit 17, putative OS=Plasmodium falciparum (isolate 3D7) OX=36329 GN=PF3D7_0520200 PE=4 SV=1	37C	1	0.997133	1.01208	1.00258	0.997257	0.987533	1.00241	0.988958	1.01687	1.00537	19	38	2	3.0274	0.0142351	0.182414
C0H4G4	Uncharacterized protein OS=Plasmodium falciparum (isolate 3D7) OX=36329 GN=PF3D7_0527600 PE=4 SV=2	37C	1	1.01174	0.996511	0.9888	0.999002	1.00848	0.975905	0.997612	1.01695	1.00447	12	26	2	0.0349508	0.00152626	0.132737
Q8I487	Skeleton-binding protein 1 OS=Plasmodium falciparum (isolate 3D7) OX=36329 GN=PF3D7_0501300 PE=4 SV=1	37C	1	1.15722	1.1194	1.14725	1.13218	1.03744	1.08265	1.11192	1.1379	1.12064	5	17	2	203.356	0.530012	-0.000294771
C0H5G7	U4/U6 small nuclear ribonucleoprotein PRP4, putative OS=Plasmodium falciparum (isolate 3D7) OX=36329 GN=PF3D7_1343900 PE=4 SV=1	37C	1	1.01713	1.01298	1.01775	1.0364	1.03531	1.01971	1.03492	0.999998	1.03119	16	25	2	349.472	0.285474	-0.0335082
Q8I2I2	Mitochondrial-processing peptidase subunit beta, putative OS=Plasmodium falciparum (isolate 3D7) OX=36329 GN=PF3D7_0933600 PE=3 SV=1	37C	1	1.01413	1.02485	1.01997	1.00399	1.016	0.994319	0.985607	0.973137	0.914565	18	36	2	48.3579	0.897553	-0.928994
Q8IDR3	Myosin-A OS=Plasmodium falciparum (isolate 3D7) OX=36329 GN=MyoA PE=1 SV=1	37C	1	0.995826	1.01765	1.01097	1.00041	1.01298	1.01719	1.01677	1.01015	0.984238	17	26	2	121.79	0.493115	-2.84914
Q8IJ85	mRNA-decapping enzyme subunit 1, putative OS=Plasmodium falciparum (isolate 3D7) OX=36329 GN=PF3D7_1032100 PE=3 SV=1	37C	1	1.02457	0.972163	1.00493	0.997461	1.02315	1.01046	1.01203	0.996196	1.01996	20	37	2		0.0709971	-6.6897e-05
Q8IJH7	4-hydroxy-3-methylbut-2-en-1-yl diphosphate synthase (Ferredoxin), putative OS=Plasmodium falciparum (isolate 3D7) OX=36329 GN=PF3D7_1022800 PE=3 SV=1	37C	1	0.98759	0.993069	1.00535	0.98232	1.00459	0.998217	1.03526	1.01638	0.990308	21	33	2	1.88476	0.285841	1.61809
Q8IAY9	Importin subunit beta, putative OS=Plasmodium falciparum (isolate 3D7) OX=36329 GN=PF3D7_0815200 PE=4 SV=1	37C	1	1.03876	1.02086	1.05567	1.0335	1.00246	1.04922	0.991132	1.00054	0.942953	19	35	2	27.7169	0.596365	-1.10765
Q8I2Q0	Parasitophorous vacuolar protein 5, putative OS=Plasmodium falciparum (isolate 3D7) OX=36329 GN=PF3D7_0925900 PE=1 SV=1	37C	1	0.965368	0.996046	1.00624	0.968675	0.997476	0.966816	0.920867	0.785627	0.691267	8	79	2	34.967	0.984172	-1.26872
Q8IBT2	Eukaryotic translation initiation factor 3 subunit I OS=Plasmodium falciparum (isolate 3D7) OX=36329 GN=PF3D7_0716800 PE=3 SV=1	37C	1	0.971489	1.02646	0.998462	0.98477	0.995139	0.95919	0.971854	0.9378	0.904992	15	37	2	19.974	0.785046	-0.667251
Q8ILK1	Protein arginine N-methyltransferase 1 OS=Plasmodium falciparum (isolate 3D7) OX=36329 GN=PF3D7_1426200 PE=4 SV=1	37C	1	0.965178	1.00827	1.00463	0.9879	1.00047	1.00286	1.05189	1.09533	1.07766	18	49	2	9.59883	0.905748	2.2999
Q8IM66	26S proteasome regulatory subunit RPN6 OS=Plasmodium falciparum (isolate 3D7) OX=36329 GN=PF3D7_1402300 PE=3 SV=1	37C	1	1.06187	1.04154	1.06086	1.05547	1.00022	1.04693	0.956715	0.954263	0.888538	15	49	2	21.2953	0.80377	-0.866834
Q7K734	Flap endonuclease 1 OS=Plasmodium falciparum (isolate 3D7) OX=36329 GN=FEN1 PE=3 SV=1	37C	1	0.993325	0.995378	0.997146	0.985019	1.00709	0.978635	1.0374	1.05119	1.04753	16	34	2	9.70723	0.910905	4.5358
Q8IBE8	Erythrocyte binding antigen-175 OS=Plasmodium falciparum (isolate 3D7) OX=36329 GN=PF3D7_0731500 PE=1 SV=2	37C	1	1.01358	1.0066	1.00753	1.02696	1.00402	0.994302	1.00451	0.991476	1.00089	23	25	2	0.851043	0.414697	-2.87557
Q8IHR4	Dynamin-like protein OS=Plasmodium falciparum (isolate 3D7) OX=36329 GN=PF3D7_1145400 PE=3 SV=1	37C	1	1.05765	1.03747	1.06455	1.06021	1.01145	1.04419	1.01932	0.995843	0.989437	21	33	2	10.3096	0.467214	-1.52957
Q8I2V5	TLD domain-containing protein OS=Plasmodium falciparum (isolate 3D7) OX=36329 GN=PF3D7_0919800 PE=4 SV=1	37C	1	0.932637	0.984424	0.918585	0.932207	0.934426	0.902166	0.922302	0.919156	0.925103	21	30	2	0.00154202	0.658198	-0.296557
Q8IAS1	Ubiquitin regulatory protein, putative OS=Plasmodium falciparum (isolate 3D7) OX=36329 GN=PF3D7_0808300 PE=4 SV=1	37C	1	0.993738	1.00372	1.00704	1.00377	1.01516	0.995225	1.02154	1.03711	1.06946	12	37	2	35.4024	0.906442	1.25624
A0A5K1K7U1	Proteasome subunit beta OS=Plasmodium falciparum (isolate 3D7) OX=36329 GN=PF3D7_0518300 PE=3 SV=1	37C	1	0.993221	1.03104	1.04207	1.01427	1.00882	1.01699	1.0171	1.0179	1.01536	9	55	2	0.806435	0.156946	0.00227183
Q8I255	Secreted ookinete protein, putative OS=Plasmodium falciparum (isolate 3D7) OX=36329 GN=PF3D7_0108700 PE=4 SV=2	37C	1	0.907908	0.979874	0.910625	0.904566	0.934118	0.914644	0.936878	0.955858	0.987698	19	34	2	158.618	0.218853	1.31131
Q8I6Z8	U4/U6.U5 tri-snRNP-associated protein 2, putative OS=Plasmodium falciparum (isolate 3D7) OX=36329 GN=PF3D7_1317000 PE=4 SV=1	37C	1	0.977521	0.987099	1.00218	0.998634	0.9933	0.989413	1.02186	1.02698	1.03882	16	24	2	10.0708	0.847255	4.39149
Q8IBR1	Uncharacterized protein OS=Plasmodium falciparum (isolate 3D7) OX=36329 GN=PF3D7_0719000 PE=4 SV=1	37C	1	0.994179	0.935635	0.951418	0.981347	0.948712	1.01006	1.04327	1.07496	1.05145	10	35	2	3.90879	0.79022	2.10175
C6KSP9	RNA-binding protein, putative OS=Plasmodium falciparum (isolate 3D7) OX=36329 GN=PF3D7_0605100 PE=4 SV=1	37C	1	1.04592	1.00965	1.02026	1.02029	1.0176	1.00609	1.03904	1.03988	1.06038	19	29	2	0.587207	0.360788	0.15013
Q8I2S6	DNA-directed RNA polymerase II subunit RPB3, putative OS=Plasmodium falciparum (isolate 3D7) OX=36329 GN=PF3D7_0923000 PE=3 SV=1	37C	1	1.00422	1.00402	1.00402	1.00636	1.02311	1.00676	1.02756	1.01653	1.01904	11	41	2	0.260687	0.662076	1.91656
Q8IJP2	Methionine aminopeptidase 1b OS=Plasmodium falciparum (isolate 3D7) OX=36329 GN=METAP1b PE=1 SV=1	37C	1	1.01908	1.01727	1.01105	1.01071	1.02677	1.01913	0.996629	0.979395	0.95335	16	32	2	31.6543	0.880806	-1.36676
Q8I5B6	ATP-dependent protease subunit ClpQ OS=Plasmodium falciparum (isolate 3D7) OX=36329 GN=PF3D7_1230400 PE=3 SV=2	37C	1	0.998392	1.01553	1.0275	0.997804	0.981633	0.984225	0.941973	0.948048	0.879499	5	34	2	100.079	0.896684	-0.517828
Q8ILI2	Proliferation-associated protein 2g4, putative OS=Plasmodium falciparum (isolate 3D7) OX=36329 GN=PF3D7_1428300 PE=3 SV=1	37C	1	0.974758	1.02698	1.02045	0.978347	1.01872	1.00583	0.989315	0.973799	0.922067	12	56	2	68.0614	0.694669	-1.59948
Q8IJZ4	E3 ubiquitin-protein ligase, putative OS=Plasmodium falciparum (isolate 3D7) OX=36329 GN=PF3D7_1004300 PE=4 SV=1	37C	1	1.02366	1.02049	1.02002	1.03786	1.0385	1.0104	1.01859	1.03226	1.02461	19	41	2	7.11351e+144	0.449095	-0.00423344
Q8I426	Nuclear protein localization protein 4, putative OS=Plasmodium falciparum (isolate 3D7) OX=36329 GN=PF3D7_0507700 PE=4 SV=1	37C	1	0.992349	1.00549	0.995386	0.988689	1.01168	1.01296	1.03139	1.04073	1.04851	18	55	2	5.87483	0.927064	0.886222
Q8IEA6	Dihydrolipoyllysine-residue succinyltransferase OS=Plasmodium falciparum (isolate 3D7) OX=36329 GN=PF3D7_1320800 PE=3 SV=1	37C	1	1.03745	1.03325	1.02485	1.01779	0.989626	1.02083	0.996697	0.987334	0.964807	11	26	2	7.74543	0.613516	-0.592513
Q8IHN1	Ring-infected erythrocyte surface antigen OS=Plasmodium falciparum (isolate 3D7) OX=36329 GN=PF3D7_1149200 PE=4 SV=1	37C	1	0.91208	0.985686	0.921181	0.930288	0.920852	0.965552	0.979124	1.02976	1.04267	13	31	2	16.1409	0.627586	1.53132
Q8ILL3	60S ribosomal protein L5, putative OS=Plasmodium falciparum (isolate 3D7) OX=36329 GN=PF3D7_1424100 PE=1 SV=1	37C	1	1.06006	1.07618	1.13845	1.08191	1.05391	1.09021	1.0816	1.09371	1.16356	13	27	2	0.0563601	0.54899	0.098593
A0A5K1K8Q1	Exportin-T OS=Plasmodium falciparum (isolate 3D7) OX=36329 GN=PF3D7_1315900 PE=3 SV=1	37C	1	1.06531	1.04001	1.07561	1.06813	1.01967	1.05586	1.00607	0.995408	0.961506	20	40	2	15.2358	0.603432	-1.26934
A0A143ZY58	ADP-ribosylation factor OS=Plasmodium falciparum (isolate 3D7) OX=36329 GN=PF3D7_1020900 PE=3 SV=1	37C	1	0.960155	1.09174	1.11571	1.0558	1.06066	1.09066	1.16357	1.03195	1.3177	6	31	2	11.9327	0.45876	0.291818
Q8IKZ6	Multidrug resistance protein 2 OS=Plasmodium falciparum (isolate 3D7) OX=36329 GN=PF3D7_1447900 PE=4 SV=1	37C	1	1.10274	1.04623	1.08618	1.1109	1.0405	1.03715	1.0234	1.00697	1.07354	14	30	2	0.939439	0.167767	-1.54174
Q8IJH9	Kelch protein K10 OS=Plasmodium falciparum (isolate 3D7) OX=36329 GN=PF3D7_1022600 PE=4 SV=1	37C	1	1.04942	1.03	0.983536	1.01539	0.999637	0.998816	1.01274	1.05654	1.08285	17	25	2	30.8023	0.649123	2.62269
O96229	Rhoptry neck protein 6 OS=Plasmodium falciparum (isolate 3D7) OX=36329 GN=PF3D7_0214900 PE=4 SV=3	37C	1	1.00769	1.00139	1.00253	0.999208	0.991291	0.968167	0.967468	0.994142	0.963979	18	31	2	0.88358	0.744795	-3.68743
Q8I3Y6	Probable prefoldin subunit 6 OS=Plasmodium falciparum (isolate 3D7) OX=36329 GN=PFE0595w PE=1 SV=2	37C	1	0.980752	1.04203	1.05814	1.01688	1.0572	1.07342	1.11378	1.07395	1.16719	9	33	2	2.63662	0.758616	0.337557
C0H4X7	Uncharacterized protein OS=Plasmodium falciparum (isolate 3D7) OX=36329 GN=PF3D7_0825000 PE=4 SV=1	37C	1	0.986295	0.94991	0.916914	0.969287	0.96047	0.995492	1.03203	1.05993	1.05938	25	34	2	5.35477	0.779238	1.4772
Q8IDR1	Phosphoenolpyruvate carboxykinase (ATP) OS=Plasmodium falciparum (isolate 3D7) OX=36329 GN=PF3D7_1342800 PE=3 SV=1	37C	1	1.00763	0.990534	0.991972	0.995053	0.993892	0.977586	0.988112	0.994475	0.968966	13	29	2	2.38562	0.494976	-0.298972
Q7KWJ5	Hexose transporter OS=Plasmodium falciparum (isolate 3D7) OX=36329 GN=PF3D7_0204700 PE=3 SV=1	37C	1	1.27878	1.16263	1.28465	1.24953	1.06855	1.1657	1.05649	1.10892	1.13192	9	23	2	0.405033	0.226054	-4.95467
Q8I4Y0	Kinesin-13, putative OS=Plasmodium falciparum (isolate 3D7) OX=36329 GN=PF3D7_1245100 PE=1 SV=2	37C	1	1.00248	0.993119	0.990939	0.985712	0.994613	0.998931	0.983172	0.97238	0.962329	26	31	2	17.1503	0.8398	-1.82919
Q8IB20	Zinc finger protein, putative OS=Plasmodium falciparum (isolate 3D7) OX=36329 GN=PF3D7_0818500 PE=4 SV=1	37C	1	0.972501	0.969017	0.965609	0.965598	0.981416	0.981355	0.990867	1.02086	1.00537	8	28	2	13.4578	0.673097	5.89216
Q8I574	Splicing factor 3B subunit 3, putative OS=Plasmodium falciparum (isolate 3D7) OX=36329 GN=PF3D7_1234800 PE=4 SV=1	37C	1	1.01444	0.991959	0.982922	1.02474	0.97441	1.0023	1.00965	1.01633	1.01079	22	26	2	0.000315778	0.0138634	0.0574064
O00806	60S acidic ribosomal protein P2 OS=Plasmodium falciparum (isolate 3D7) OX=36329 GN=MAL3P3.19 PE=3 SV=1	37C	1	1.00043	1.02753	1.04098	1.01095	1.03222	1.03279	1.02641	0.966294	1.02368	4	14	2	20.3165	0.225022	-3.58218
Q8I374	Proteasome activator 28 subunit beta, putative OS=Plasmodium falciparum (isolate 3D7) OX=36329 GN=PF3D7_0907700 PE=1 SV=1	37C	1	0.964603	1.01863	0.983808	1.07732	0.995755	1.0104	1.04453	1.09667	1.19574	11	41	2	52.3981	0.814236	1.27712
Q8IEI6	EMP1-trafficking protein OS=Plasmodium falciparum (isolate 3D7) OX=36329 GN=PF3D7_1302000 PE=4 SV=1	37C	1	1.11099	1.06796	1.1233	1.13604	1.02507	1.07787	1.06081	1.05411	1.12738	6	27	2	431194	0.359142	-1.98819e-05
Q8I5T2	Glutathione peroxidase OS=Plasmodium falciparum (isolate 3D7) OX=36329 GN=PF3D7_1212000 PE=3 SV=1	37C	1	0.996343	1.01554	1.01897	0.994981	1.02058	0.991893	1.00871	0.990422	0.963153	11	50	2	60.7192	0.649528	-3.20521
Q8I5E2	Uncharacterized protein OS=Plasmodium falciparum (isolate 3D7) OX=36329 GN=PF3D7_1227600 PE=4 SV=2	37C	1	0.967054	1.00514	0.949738	0.997752	0.989711	0.983664	1.00399	1.01959	1.04074	18	31	2	14.5171	0.572229	1.39497
Q8I3R2	EELM2 domain-containing protein, putative OS=Plasmodium falciparum (isolate 3D7) OX=36329 GN=PF3D7_0519800 PE=4 SV=1	37C	1	0.999067	0.998616	1.00602	0.983187	1.01885	0.973006	0.999726	1.02433	1.04558	12	28	2	46.815	0.649897	2.54044
Q8IJB8	Uncharacterized protein OS=Plasmodium falciparum (isolate 3D7) OX=36329 GN=PF3D7_1028600 PE=4 SV=1	37C	1	0.980514	1.01798	1.0227	1.00963	0.997572	1.00454	0.991901	0.998467	0.944538	5	19	2	75.5947	0.697123	-5.93499
Q8IDW0	1-deoxy-D-xylulose-5-phosphate synthase OS=Plasmodium falciparum (isolate 3D7) OX=36329 GN=PF3D7_1337200 PE=3 SV=1	37C	1	0.989699	0.988119	0.997585	0.98407	1.0025	1.00599	1.00299	1.00339	1.00988	24	48	2	0.619348	0.655519	2.6542
Q7KQM4	Plasmepsin I OS=Plasmodium falciparum (isolate 3D7) OX=36329 GN=PMI PE=1 SV=1	37C	1	1.06793	1.04195	1.07553	1.04826	1.02769	1.03897	0.995745	1	0.896332	8	35	2	61.1077	0.76947	-1.03779
Q8I5J2	Uncharacterized protein OS=Plasmodium falciparum (isolate 3D7) OX=36329 GN=PF3D7_1222100 PE=4 SV=1	37C	1	1.00029	1.00194	1.00629	0.985893	1.02276	1.00938	1.03492	1.02661	1.03119	15	33	2	1.51576	0.705504	1.06415
C6KT67	Nuclear polyadenylated RNA-binding protein NAB2, putative OS=Plasmodium falciparum (isolate 3D7) OX=36329 GN=PF3D7_0623100 PE=4 SV=1	37C	1	0.984072	0.974908	0.98298	1.01865	0.987618	0.984705	0.977737	0.990914	1.01353	15	32	2	192.566	0.277615	2.4717
Q8I4Y3	Translation machinery-associated protein 46, putative OS=Plasmodium falciparum (isolate 3D7) OX=36329 GN=PF3D7_1244800 PE=4 SV=1	37C	1	0.995889	0.999688	1.00749	0.990915	1.00265	1.00827	1.00945	1.02309	0.981659	13	31	2	0.0758911	0.00495904	-0.015632
C6KSR5	Coatomer alpha subunit, putative OS=Plasmodium falciparum (isolate 3D7) OX=36329 GN=PF3D7_0606700 PE=4 SV=1	37C	1	1.04137	1.03891	1.06598	1.04516	1.03864	1.04008	1.04583	1.03041	1.07354	20	26	2	0.00783629	0.572548	0.031391
Q8I308	Uncharacterized protein OS=Plasmodium falciparum (isolate 3D7) OX=36329 GN=PF3D7_0914400 PE=4 SV=1	37C	1	1.01234	1.0026	1.02128	0.991426	1.00707	0.997736	1.02749	1.00139	1.04655	11	31	2	18.2875	0.351067	0.967287
C6KSX0	Merozoite surface protein P12 OS=Plasmodium falciparum (isolate 3D7) OX=36329 GN=PF12 PE=1 SV=1	37C	1	1.07077	1.01002	1.03909	1.05828	0.992856	0.985707	0.894543	0.823926	0.727508	9	18	2	33.0143	0.95558	-0.725887
Q8IBM0	Uncharacterized protein OS=Plasmodium falciparum (isolate 3D7) OX=36329 GN=PF3D7_0723300 PE=4 SV=1	37C	1	1.01145	0.995899	1.00133	0.984824	1.01284	1.00642	0.996145	0.998612	0.935887	23	34	2	126.024	0.865494	-3.5605
Q8I527	4-methyl-5-beta-hydroxyethylthiazole kinase OS=Plasmodium falciparum (isolate 3D7) OX=36329 GN=PF3D7_1239600 PE=4 SV=1	37C	1	1.08056	1.05283	1.09462	1.07211	1.03932	1.05256	1.01852	1.00707	0.968131	8	26	2	17.1864	0.575291	-0.982548
Q8IB63	Uncharacterized protein OS=Plasmodium falciparum (isolate 3D7) OX=36329 GN=PF3D7_0822900 PE=4 SV=1	37C	1	1.00432	0.990789	0.97863	1.01685	1.00961	0.970909	0.974933	1.01113	1.01261	12	21	2	1002.57	0.0010724	-0.0415378
Q8IDY0	MSP7-like protein OS=Plasmodium falciparum (isolate 3D7) OX=36329 GN=PF3D7_1334800 PE=4 SV=1	37C	1	1.01994	1.01644	1.06164	1.01677	1.00393	1.03997	1.04901	1.0278	1.06641	13	36	2	0.246533	0.365278	0.161828
C0H4Q1	Allantoicase OS=Plasmodium falciparum (isolate 3D7) OX=36329 GN=PF3D7_0729100 PE=3 SV=1	37C	1	0.984802	0.991124	0.980483	0.970707	0.980589	0.998413	1.00144	1.00945	1.01904	23	31	2	6.42742	0.68964	1.23501
Q8IIR6	DnaJ homolog subfamily C member 16 OS=Plasmodium falciparum (isolate 3D7) OX=36329 GN=PF3D7_1108700 PE=4 SV=1	37C	1	1.05233	1.05579	1.08838	1.08024	1.06427	1.08408	1.05991	1.01032	0.964807	19	33	2	48.6598	0.635375	-2.63481
Q9NLB2	Glutaredoxin OS=Plasmodium falciparum (isolate 3D7) OX=36329 GN=PF3D7_0306300 PE=1 SV=1	37C	1	0.948825	0.996921	0.985122	1.00574	1.00842	0.996236	1.00751	1.03787	1.03119	5	49	2	1.26089	0.554093	0.497125
Q8I5A9	Ras-related protein Rab-2 OS=Plasmodium falciparum (isolate 3D7) OX=36329 GN=PF3D7_1231100 PE=4 SV=1	37C	1	1.05199	1.01522	1.0557	1.07896	0.982419	1.01141	0.946511	0.921974	0.882954	13	30	2	10.5603	0.810632	-0.888023
Q8I608	Nucleosome assembly protein OS=Plasmodium falciparum (isolate 3D7) OX=36329 GN=PF3D7_1203700 PE=1 SV=2	37C	1	0.967969	0.984177	0.96131	0.973167	1.00443	1.01955	1.20455	1.42975	1.43185	10	70	2	12.7016	0.994092	1.98842
Q8IKY0	AP2 domain transcription factor AP2-O5, putative OS=Plasmodium falciparum (isolate 3D7) OX=36329 GN=PF3D7_1449500 PE=4 SV=1	37C	1	1.00064	0.987832	0.996817	1.02925	1.01578	1.03361	1.03166	1.01113	1.01261	12	38	2	0.0792224	0.674448	2.05922
C6S3C9	Serine/threonine-protein phosphatase OS=Plasmodium falciparum (isolate 3D7) OX=36329 GN=PF3D7_1018200 PE=3 SV=1	37C	1	1.03446	1.00294	1.02151	1.0177	1.03359	1.03318	1.03888	1.03627	1.06641	23	29	2	0.763717	0.662893	0.234638
Q8I1P3	Uncharacterized protein OS=Plasmodium falciparum (isolate 3D7) OX=36329 GN=PF3D7_0419400 PE=4 SV=1	37C	1	1.01511	1.0278	0.990141	1.02509	0.988613	1.00166	0.96784	0.946593	0.887135	25	32	2	134.102	0.906112	-0.680179
Q8II32	Uncharacterized protein OS=Plasmodium falciparum (isolate 3D7) OX=36329 GN=PF3D7_1133200 PE=4 SV=1	37C	1	0.948996	0.977658	0.964783	0.964535	0.962042	0.97539	0.97854	0.996735	1.01536	25	32	2	24.1858	0.5683	1.54028
Q8IE50	Myosin F, putative OS=Plasmodium falciparum (isolate 3D7) OX=36329 GN=PF3D7_1329100 PE=3 SV=1	37C	1	1.01488	1.0056	0.99709	1.03117	0.969773	1.00823	0.94983	0.944019	0.929694	19	22	2	9.34739	0.790205	-5.0438
Q8I6S5	Oxoglutarate dehydrogenase (succinyl-transferring) OS=Plasmodium falciparum (isolate 3D7) OX=36329 GN=PF3D7_0820700 PE=3 SV=1	37C	1	1.03365	1.00114	1.02521	1.02577	1.0004	0.995185	0.941303	0.899026	0.839432	20	31	2	22.8042	0.963017	-0.899508
Q8I4X3	Ankyrin-repeat protein, putative OS=Plasmodium falciparum (isolate 3D7) OX=36329 GN=PF3D7_1245900 PE=4 SV=1	37C	1	0.984063	0.998072	0.99593	0.988951	0.979501	0.983179	0.966232	0.944665	0.941374	11	31	2	10.9	0.928737	-0.786637
Q8IEJ6	2-oxoisovalerate dehydrogenase subunit alpha OS=Plasmodium falciparum (isolate 3D7) OX=36329 GN=PF3D7_1312600 PE=3 SV=1	37C	1	0.96394	0.982018	0.956983	0.962833	0.984081	0.975563	1.0048	1.03633	1.0117	14	34	2	10.9782	0.708956	3.63272
Q8I510	Tetratricopeptide repeat protein, putative OS=Plasmodium falciparum (isolate 3D7) OX=36329 GN=PF3D7_1241900 PE=4 SV=1	37C	1	1.01894	1.01452	1.00961	1.02774	1.01362	1.02548	1.05357	1.08048	1.10739	21	32	2	12.4687	0.947648	1.11064
A0A5K1K8J8	Uncharacterized protein OS=Plasmodium falciparum (isolate 3D7) OX=36329 GN=PF3D7_1344900 PE=4 SV=1	37C	1	1.00585	0.98941	0.971271	0.977243	1.0032	0.976623	1.00272	0.983668	0.970639	18	25	2	0.418723	0.169477	-0.156183
Q8IBV5	Uncharacterized protein OS=Plasmodium falciparum (isolate 3D7) OX=36329 GN=PF3D7_0714200 PE=4 SV=1	37C	1	0.995017	1.01203	0.977572	1.01091	0.999085	1.01096	1.01006	1.01709	1.05639	19	26	2	15.2686	0.627288	0.803026
Q8I1X5	Pre-mRNA-processing-splicing factor 8, putative OS=Plasmodium falciparum (isolate 3D7) OX=36329 GN=PF3D7_0405400 PE=4 SV=1	37C	1	0.98968	0.99977	0.994863	1.00378	0.976193	0.98417	0.962933	0.951133	0.980803	20	27	2	1.31958	0.681525	-1.13447
Q8I5A0	Dihydrolipoyl dehydrogenase OS=Plasmodium falciparum (isolate 3D7) OX=36329 GN=PF3D7_1232200 PE=3 SV=2	37C	1	1.00264	0.989422	1.01594	0.98819	0.995277	1.01565	0.975809	0.999267	0.95335	11	22	2	103.36	0.573918	-5.94222
Q8I5X7	Uncharacterized protein OS=Plasmodium falciparum (isolate 3D7) OX=36329 GN=PF3D7_1206800 PE=4 SV=1	37C	1	1.00977	1.00898	1.01709	1.01973	1.00362	1.04388	1.02369	1.00743	1.01904	13	29	2	1.06103	0.239838	0.103268
Q8I5C5	Macrophage migration inhibitory factor OS=Plasmodium falciparum (isolate 3D7) OX=36329 GN=PF3D7_1229400 PE=1 SV=1	37C	1	0.937391	0.971294	0.965632	0.93721	0.966502	0.966402	1.00005	0.990247	1.01079	5	84	2	6.06051	0.489065	3.72837
Q7K6A0	cAMP-dependent protein kinase catalytic subunit OS=Plasmodium falciparum (isolate 3D7) OX=36329 GN=PF3D7_0934800 PE=3 SV=1	37C	1	0.975393	0.99971	1.00679	0.982292	1.00638	0.986215	1.02159	1.04257	1.02275	13	48	2	9.59243	0.70068	3.64895
Q8I241	DNA-directed RNA polymerase II subunit RPB9, putative OS=Plasmodium falciparum (isolate 3D7) OX=36329 GN=PF3D7_0110400 PE=4 SV=1	37C	1	1.03265	1.03523	1.0188	0.998702	1.01924	0.997114	1.0176	1.01558	0.933555	13	23	2	74.9612	0.780065	-5.10012
Q8ILN9	Uncharacterized protein OS=Plasmodium falciparum (isolate 3D7) OX=36329 GN=PF3D7_1421100 PE=4 SV=1	37C	1	0.963417	0.964871	0.93348	0.955537	0.955226	0.943044	0.944534	0.982776	0.929694	26	34	2	0.00130406	0.522503	-0.949236
Q8I3A9	GTPase-activating protein, putative OS=Plasmodium falciparum (isolate 3D7) OX=36329 GN=PF3D7_0904000 PE=4 SV=1	37C	1	0.975853	1.00334	0.983684	0.983187	0.981107	1.0005	0.991828	1.00901	0.934331	20	63	2	466.746	0.734475	-4.71841
Q8IJM0	26S proteasome regulatory subunit p55, putative OS=Plasmodium falciparum (isolate 3D7) OX=36329 GN=PF3D7_1017900 PE=3 SV=1	37C	1	1.00949	1.05722	1.03403	1.05756	0.965497	1.08073	0.967155	1.01631	0.885737	14	36	2	89.924	0.558865	-4.12018
Q8IKV9	Calcineurin subunit B OS=Plasmodium falciparum (isolate 3D7) OX=36329 GN=PF3D7_1451700 PE=3 SV=2	37C	1	0.959499	1.00109	1.00047	0.9932	1.01142	1.02441	1.06229	1.02888	1.04074	10	24	2	1.10039	0.731532	1.24896
Q8IAW7	CS domain protein, putative OS=Plasmodium falciparum (isolate 3D7) OX=36329 GN=PF3D7_0813200 PE=4 SV=1	37C	1	0.989769	0.982806	1.01344	0.983994	0.996314	0.990668	0.97691	0.940563	0.923583	15	29	2	26.1263	0.901878	-1.54143
Q8IL72	Leucine carboxyl methyltransferase 1 OS=Plasmodium falciparum (isolate 3D7) OX=36329 GN=PF3D7_1439700 PE=3 SV=2	37C	1	1.02546	0.999515	0.993279	1.00448	1.02163	0.982305	0.950854	0.945678	0.869296	8	21	2	161.246	0.910842	-0.64582
Q8IHR8	Ras-related protein Rab-6 OS=Plasmodium falciparum (isolate 3D7) OX=36329 GN=PF3D7_1144900 PE=4 SV=2	37C	1	1.0355	1.05403	1.08989	1.07674	1.01827	1.05654	1.01933	0.993477	1.00898	10	30	2	6.78514	0.347014	-2.27182
Q8II93	Protein phosphatase, putative OS=Plasmodium falciparum (isolate 3D7) OX=36329 GN=PF3D7_1127000 PE=4 SV=2	37C	1	1.06081	1.02999	1.05034	1.03397	1.0162	1.03987	1.01782	1.02625	1.00089	7	18	2	22.5311	0.215965	-0.875928
Q8I4U1	Protein phosphatase PPM4, putative OS=Plasmodium falciparum (isolate 3D7) OX=36329 GN=PF3D7_1249300 PE=4 SV=1	37C	1	0.999231	1.01654	0.993028	1.03393	1.00267	0.986233	0.970624	0.940098	0.950931	22	28	2	6.74371	0.821967	-1.30617
Q8IL89	Succinyl-CoA ligase, putative OS=Plasmodium falciparum (isolate 3D7) OX=36329 GN=PF3D7_1437700 PE=4 SV=1	37C	1	1.0036	1.02502	1.03757	1.02368	1.02027	1.06406	1.00618	0.953118	0.857361	18	29	2	63.2762	0.901035	-1.87483
Q8ILC9	Zinc finger protein, putative OS=Plasmodium falciparum (isolate 3D7) OX=36329 GN=PF3D7_1433400 PE=4 SV=2	37C	1	0.990148	0.997472	0.958006	1.01782	0.966973	0.988295	0.956294	0.98339	0.965636	21	30	2	0.127138	0.225625	-0.264746
Q8I668	Uncharacterized protein OS=Plasmodium falciparum (isolate 3D7) OX=36329 GN=PF3D7_0203400 PE=4 SV=2	37C	1	0.947289	0.966754	0.979984	0.949534	0.9897	0.979914	1.0386	1.03825	1.03978	4	30	2	5.11171	0.797545	4.14265
Q8IM16	Plasmepsin IV OS=Plasmodium falciparum (isolate 3D7) OX=36329 GN=PMIV PE=1 SV=1	37C	1	0.981704	1.00098	0.969418	0.973051	0.999023	0.985098	1.03723	1.06233	1.05342	8	28	2	9.54748	0.890229	3.51619
Q8IHT8	Methyltransferase, putative OS=Plasmodium falciparum (isolate 3D7) OX=36329 GN=PF3D7_1142700 PE=4 SV=1	37C	1	1.0237	1.00749	1.01363	1.01493	1.04014	1.00458	1.01604	1.01068	1.0369	12	18	2	0.0166414	0.232926	0.0820057
C0H5J6	Protein transport protein Sec24A OS=Plasmodium falciparum (isolate 3D7) OX=36329 GN=PF3D7_1361100 PE=4 SV=1	37C	1	1.03934	0.959901	1.00473	1.02214	0.986336	0.964264	0.937002	0.908793	0.89065	9	41	2	8.31791	0.823177	-0.840775
C0H579	PUB domain-containing protein, putative OS=Plasmodium falciparum (isolate 3D7) OX=36329 GN=PF3D7_0931400 PE=4 SV=1	37C	1	0.973662	1.01447	0.994665	0.991934	1.00312	0.984312	1.01786	1.02633	1	10	31	2	6.32974	0.361703	4.0075
Q8IB78	Nucleoside transporter 2 OS=Plasmodium falciparum (isolate 3D7) OX=36329 GN=PF3D7_0824400 PE=3 SV=1	37C	1	1.17203	1.10572	1.16881	1.17183	1.04836	1.11845	1.0639	1.1017	1.17205	19	36	2	6.28221e+06	0.407128	-8.91969e-05
Q8I384	Arginase OS=Plasmodium falciparum (isolate 3D7) OX=36329 GN=PF3D7_0906500 PE=1 SV=1	37C	1	0.99551	0.990397	0.986802	0.984869	1.00964	0.98757	0.99146	0.986818	0.961506	14	29	2	14.1274	0.449259	-1.17785
C0H586	Calcyclin-binding protein, putative OS=Plasmodium falciparum (isolate 3D7) OX=36329 GN=PF3D7_0933200 PE=4 SV=2	37C	1	0.989284	1.0143	1.01051	0.969609	1.01038	0.981895	0.984006	0.954337	0.913079	11	44	2	50.893	0.808333	-1.24628
Q8I562	Clustered-asparagine-rich protein OS=Plasmodium falciparum (isolate 3D7) OX=36329 GN=PF3D7_1236100 PE=4 SV=2	37C	1	1.0036	1.00973	1.01024	1.00728	1.02401	0.998385	1.04712	1.0389	1.05938	11	65	2	7.64696	0.839914	4.53738
Q8IHX6	WD repeat-containing protein, putative OS=Plasmodium falciparum (isolate 3D7) OX=36329 GN=PF3D7_1138800 PE=4 SV=2	37C	1	1.12434	0.978332	0.977854	0.990311	1.00979	0.981748	0.999566	1.01258	1.01812	18	27	2		0.00504632	-4.8496e-05
Q8IED5	Ferredoxin, apicoplast OS=Plasmodium falciparum (isolate 3D7) OX=36329 GN=FD PE=1 SV=1	37C	1	0.992899	0.97007	0.991371	0.976503	0.983024	0.933017	0.877875	0.854757	0.764106	8	24	2	76.8155	0.971784	-0.531918
A0A5K1K8H7	Ras-related protein Rab-1B OS=Plasmodium falciparum (isolate 3D7) OX=36329 GN=PF3D7_0512600 PE=4 SV=1	37C	1	1.00974	0.991257	1.01979	1.00695	0.989259	0.976557	0.967626	0.944591	0.936667	10	49	2	7.99596	0.913295	-0.732392
Q8II87	CRAL/TRIO domain-containing protein, putative OS=Plasmodium falciparum (isolate 3D7) OX=36329 GN=PF3D7_1127600 PE=4 SV=2	37C	1	0.984227	1.03345	1.0118	0.967998	1.00824	0.966548	0.972711	0.818073	1.15757	11	30	2	0.180563	0.0147263	0.683297
Q8IDB6	Exosome complex exonuclease RRP44 OS=Plasmodium falciparum (isolate 3D7) OX=36329 GN=PF3D7_1359300 PE=3 SV=2	37C	1	0.973325	0.985274	0.96746	0.978693	0.967222	0.982303	0.998947	1.00144	1.02742	24	35	2	41.1497	0.708856	0.969108
Q8IL46	Geranylgeranyl transferase type-2 subunit alpha OS=Plasmodium falciparum (isolate 3D7) OX=36329 GN=PF3D7_1442500 PE=3 SV=2	37C	1	1.03391	0.995367	0.975356	1.01371	1.01631	1.01879	1.04579	1.05249	1.02648	14	26	2	2.08522	0.517563	1.27071
Q8IBH7	Eukaryotic translation initiation factor 2 subunit alpha OS=Plasmodium falciparum (isolate 3D7) OX=36329 GN=PF3D7_0728000 PE=3 SV=1	37C	1	0.971678	1.02526	1.00478	0.99766	1.01711	1.04822	1.09529	1.16962	1.18191	12	32	2	10.1558	0.964962	0.987432
Q8IE52	Chromatin assembly factor 1 subunit B, putative OS=Plasmodium falciparum (isolate 3D7) OX=36329 GN=PF3D7_1329300 PE=4 SV=1	37C	1	0.977249	0.970834	0.95956	0.976924	0.974379	0.963864	0.948761	1.0111	1.02275	14	21	2	40.9743	0.677958	6.04271
Q8I305	Major facilitator superfamily-related transporter, putative OS=Plasmodium falciparum (isolate 3D7) OX=36329 GN=PF3D7_0914700 PE=4 SV=1	37C	1	1.21738	1.15655	1.19502	1.20418	1.04248	1.12112	0.987927	1.02866	1.03119	8	37	2	1.75459	0.40048	-1.16803
Q7KWJ4	Adenylosuccinate lyase OS=Plasmodium falciparum (isolate 3D7) OX=36329 GN=PF3D7_0206700 PE=3 SV=1	37C	1	1.00171	0.975975	0.997391	1.01657	1.00761	1.01523	1.00143	1.00798	1.00447	14	30	2	0.0639584	0.474714	2.79183
Q8I294	Uncharacterized protein OS=Plasmodium falciparum (isolate 3D7) OX=36329 GN=PF3D7_0104500 PE=4 SV=2	37C	1	1.02337	1.00391	1.01683	1.01092	1.00723	0.974664	0.90095	0.847421	0.754869	10	23	2	29.3423	0.986446	-0.820322
Q8I2F2	PRESAN domain-containing protein OS=Plasmodium falciparum (isolate 3D7) OX=36329 GN=PF3D7_0936800 PE=1 SV=1	37C	1	1.06413	1.04986	1.07063	1.04353	1.01761	1.03824	1.00752	1.05424	1.01444	13	38	2	0.508379	0.119812	-0.959454
Q8IJ99	Probable tRNA N6-adenosine threonylcarbamoyltransferase OS=Plasmodium falciparum (isolate 3D7) OX=36329 GN=PF3D7_1030600 PE=3 SV=1	37C	1	1.00689	0.973856	0.959669	0.98822	1.01123	0.982422	1.00349	1.00809	0.959044	13	22	2	2.17738	0.0362204	-0.0134621
A0A144A2R4	Methyltransferase, putative OS=Plasmodium falciparum (isolate 3D7) OX=36329 GN=PF3D7_1455200.1 PE=4 SV=1	37C	1	0.964418	0.975979	0.972062	0.956792	0.966846	0.956303	0.939899	0.918484	0.83818	9	20	2	50.9848	0.901319	-1.11113
Q8IB67	Histone acetyltransferase GCN5 OS=Plasmodium falciparum (isolate 3D7) OX=36329 GN=PF3D7_0823300 PE=1 SV=2	37C	1	1.02275	1.00889	1.03987	1.02381	1.03267	1.02159	1.03097	1.00297	1.03214	19	29	2	832.439	0.315685	-0.000579735
Q76NM4	Ras-related protein Rab-11A OS=Plasmodium falciparum (isolate 3D7) OX=36329 GN=PF3D7_1320600 PE=1 SV=1	37C	1	1.06779	1.04106	1.07824	1.05836	0.997419	1.02258	0.95875	0.930523	0.976542	10	24	2	3.13121	0.683053	-1.14285
Q8IIR8	Succinate--CoA ligase [ADP-forming] subunit alpha, mitochondrial OS=Plasmodium falciparum (isolate 3D7) OX=36329 GN=PF3D7_1108500 PE=3 SV=2	37C	1	1.01364	1.00227	1.01472	1.02415	1.00796	0.975293	0.937948	0.890116	0.867284	9	16	2	12.3531	0.981254	-1.04122
C6KT71	FeSOD OS=Plasmodium falciparum (isolate 3D7) OX=36329 GN=PF3D7_0623500 PE=3 SV=1	37C	1	1.0231	1.00274	1.04672	1.00045	1.05376	1.01818	1.11354	1.10298	1.16116	7	24	2	15.6822	0.832697	0.741429
A0A144A1J6	Glutathione S-transferase OS=Plasmodium falciparum (isolate 3D7) OX=36329 GN=PF3D7_1419300 PE=4 SV=1	37C	1	0.971245	0.986014	1.01305	0.95929	0.987223	0.98704	1.01165	0.983949	0.975694	6	35	2	0.000130694	0.0664373	1.85308e-05
Q8IKU1	HSP90 co-chaperone p23 OS=Plasmodium falciparum (isolate 3D7) OX=36329 GN=PF3D7_1453700 PE=4 SV=2	37C	1	1.00516	1.01967	1.01376	0.986539	0.992039	0.977222	0.991719	0.917826	0.958227	8	73	2	7.23469	0.674114	-0.677253
Q8IJX8	DNA/RNA-binding protein Alba 3 OS=Plasmodium falciparum (isolate 3D7) OX=36329 GN=PF3D7_1006200 PE=4 SV=1	37C	1	0.948544	1.02467	0.970923	0.964417	0.949511	0.976014	0.987677	0.986851	1.02182	8	43	2	70.4616	0.27196	4.14467
Q8IBS6	Queuine tRNA-ribosyltransferase, putative OS=Plasmodium falciparum (isolate 3D7) OX=36329 GN=PF3D7_0717400 PE=4 SV=1	37C	1	0.988771	1.01163	0.975998	0.991533	0.99944	0.995664	0.980262	1.00674	0.95416	15	31	2	10.6039	0.197551	-0.760292
Q8I3V8	Pre-mRNA-splicing factor CWC2, putative OS=Plasmodium falciparum (isolate 3D7) OX=36329 GN=PF3D7_0515000 PE=3 SV=1	37C	1	1.0093	0.998575	1.00297	0.970561	1.01625	0.998824	1.01499	0.964337	0.902087	15	37	2	55.6449	0.866993	-4.93547
Q8IE84	V-type proton ATPase subunit G, putative OS=Plasmodium falciparum (isolate 3D7) OX=36329 GN=PF3D7_1323200 PE=3 SV=1	37C	1	0.983477	1.01941	1.00451	0.991221	1	1.04751	1.06614	1.10654	1.14811	6	36	2	13.3143	0.950808	0.824625
Q9U0H9	Uncharacterized protein OS=Plasmodium falciparum (isolate 3D7) OX=36329 GN=PF3D7_0410900 PE=4 SV=1	37C	1	1.01994	1.02241	1.02693	1.01926	1.02206	1.01735	0.99985	0.987148	0.959044	22	31	2	29.1498	0.864697	-1.17516
O77366	CCR4 domain-containing protein 4, putative OS=Plasmodium falciparum (isolate 3D7) OX=36329 GN=PF3D7_0319200 PE=4 SV=2	37C	1	0.990589	0.963421	0.964767	0.977882	0.973531	0.980208	0.988536	1.01232	1.01079	17	26	2	15.9421	0.616121	3.54421
Q8I289	Heptatricopeptide repeat and RAP domain-containing protein, putative OS=Plasmodium falciparum (isolate 3D7) OX=36329 GN=PF3D7_0105200 PE=4 SV=1	37C	1	1.0334	1.03242	1.05282	1.05269	1.04427	1.06687	1.05718	1.05572	1.05938	15	30	2	0.00145286	0.903004	0.360306
O77353	Phosphatidylinositol 3- and 4-kinase, putative OS=Plasmodium falciparum (isolate 3D7) OX=36329 GN=PF3D7_0311300 PE=3 SV=2	37C	1	1.02496	1.01344	1.0134	1.01031	1.03288	1.0275	1.07039	1.07829	1.10739	21	25	2	8.00178	0.929404	0.860952
Q8I5H2	Histone chaperone ASF1, putative OS=Plasmodium falciparum (isolate 3D7) OX=36329 GN=PF3D7_1224500 PE=1 SV=1	37C	1	1.00463	1.01219	1.03421	0.98241	0.997112	1.01457	0.993051	0.943815	0.887836	8	34	2	49.7285	0.899352	-1.74138
Q8I3T1	Eukaryotic translation initiation factor 3 subunit B OS=Plasmodium falciparum (isolate 3D7) OX=36329 GN=PF3D7_0517700 PE=3 SV=1	37C	1	1.01994	1.07216	1.06587	1.02464	1.01494	0.996714	0.977249	0.919995	0.947723	18	24	2	5.18693	0.763322	-0.9814
Q8I295	4-hydroxy-3-methylbut-2-enyl diphosphate reductase, apicoplast OS=Plasmodium falciparum (isolate 3D7) OX=36329 GN=LytB PE=1 SV=1	37C	1	0.976856	1.00274	0.983175	0.972804	1.00721	0.988546	0.964933	0.935304	0.913079	11	20	2	20.2566	0.861361	-1.55005
Q8ILX1	Nuclear transport factor 2, putative OS=Plasmodium falciparum (isolate 3D7) OX=36329 GN=PF3D7_1412300 PE=4 SV=2	37C	1	0.959048	0.99029	0.953003	0.956155	0.989326	0.95352	0.990106	0.940378	0.882954	5	77	2	56.3489	0.734263	-4.66006
Q8ILA9	Clathrin light chain OS=Plasmodium falciparum (isolate 3D7) OX=36329 GN=PF3D7_1435500 PE=3 SV=1	37C	1	1.04939	1.04515	1.05281	1.04418	1.02198	1.02894	1.08093	1.13117	1.20214	9	38	2	26.5622	0.910684	1.36894
Q8ILR0	Uncharacterized protein OS=Plasmodium falciparum (isolate 3D7) OX=36329 GN=PF3D7_1419000 PE=4 SV=1	37C	1	0.992613	0.984788	0.977975	0.994808	0.990135	0.963784	0.915854	0.919605	0.885737	20	27	2	5.65997	0.943962	-1.45312
Q8IDE5	Protein-serine/threonine phosphatase OS=Plasmodium falciparum (isolate 3D7) OX=36329 GN=PF3D7_1355700 PE=4 SV=1	37C	1	0.984676	0.962367	0.951083	0.955295	0.988306	0.973563	0.983029	0.995982	0.996454	17	25	2	8.93152	0.281727	1.32459
Q8IBB9	GPI-anchored micronemal antigen OS=Plasmodium falciparum (isolate 3D7) OX=36329 GN=PF3D7_0828800 PE=4 SV=1	37C	1	1.01908	1.03797	1.04162	1.05454	1.01745	1.03815	0.98708	0.971611	0.948523	12	26	2	11.268	0.779233	-2.66605
Q8ILL9	Serine/threonine-protein phosphatase OS=Plasmodium falciparum (isolate 3D7) OX=36329 GN=PF3D7_1423300 PE=3 SV=1	37C	1	0.975799	0.984471	0.960424	0.979565	0.985143	0.984827	1.00925	1.02936	1.03499	21	34	2	10.905	0.834984	1.73887
Q8IKH8	40S ribosomal protein S3 OS=Plasmodium falciparum (isolate 3D7) OX=36329 GN=PF3D7_1465900 PE=1 SV=1	37C	1	1.05264	1.06491	1.09209	1.07435	1.02192	1.0687	0.999723	1.00545	0.974003	11	32	2	8.59623	0.536059	-4.04983
Q8IC42	Uncharacterized protein OS=Plasmodium falciparum (isolate 3D7) OX=36329 GN=PF3D7_0702500 PE=4 SV=1	37C	1	1.16148	1.10358	1.22506	1.17482	1.0733	1.12321	1.05819	1.0672	1.19068	7	24	2	88.8622	0.33758	-0.000156766
Q8I553	SUMO-activating enzyme subunit OS=Plasmodium falciparum (isolate 3D7) OX=36329 GN=PF3D7_1237000 PE=3 SV=1	37C	1	1.01732	0.983939	1.03936	0.973103	1.01546	0.976229	0.991525	0.94974	0.960684	14	27	2	4.37096	0.465794	-0.803421
Q8IHS5	40S ribosomal protein S21 OS=Plasmodium falciparum (isolate 3D7) OX=36329 GN=PF3D7_1144000 PE=1 SV=1	37C	1	0.988213	0.974161	1.00529	0.982287	1.00744	0.984138	0.976427	0.920699	1.02836	5	27	2		0.0925013	-0.000138144
C0H5J5	RNA-binding protein, putative OS=Plasmodium falciparum (isolate 3D7) OX=36329 GN=PF3D7_1360900.1 PE=4 SV=2	37C	1	1.00882	1.00482	1.03019	0.987015	1.00672	1.00992	0.999078	0.944486	0.875389	9	33	2	55.1665	0.944482	-2.08378
Q8IKJ0	V-type proton ATPase subunit OS=Plasmodium falciparum (isolate 3D7) OX=36329 GN=PF3D7_1464700 PE=3 SV=1	37C	1	1.02612	1.03177	1.04038	1.02405	1.01511	1.01017	0.991466	0.999746	0.97316	13	28	2	3.25205	0.663106	-1.11989
Q8I3K7	Inner membrane complex protein 1g, putative OS=Plasmodium falciparum (isolate 3D7) OX=36329 GN=PF3D7_0525800 PE=4 SV=1	37C	1	1.00811	1.01328	1.02048	1.00336	1.01627	1.05268	1.03296	1.03903	1.00268	11	22	2	0.0359363	0.308241	0.408127
Q8IL96	N-acetyltransferase, GNAT family, putative OS=Plasmodium falciparum (isolate 3D7) OX=36329 GN=PF3D7_1437000 PE=4 SV=2	37C	1	1.00064	0.969217	1.00352	0.995839	1.00737	0.984727	0.954129	0.93239	0.850871	9	34	2	142.952	0.938514	-0.836443
Q8ID85	RuvB-like helicase OS=Plasmodium falciparum (isolate 3D7) OX=36329 GN=PF3D7_1362200 PE=3 SV=1	37C	1	1.01661	1.02636	0.997437	1.0121	0.963476	0.993364	0.953013	0.940653	0.918301	11	16	2	16.8512	0.848519	-0.483681
A0A144A308	Casein kinase I OS=Plasmodium falciparum (isolate 3D7) OX=36329 GN=PF3D7_1136500.1 PE=3 SV=1	37C	1	0.996471	1.01037	1.00094	0.993556	1.01264	1.01758	1.06212	1.08785	1.07766	11	26	2	6.68472	0.970818	1.73607
Q6LFN2	RING finger protein PFF0165c OS=Plasmodium falciparum (isolate 3D7) OX=36329 GN=PFF0165c PE=1 SV=1	37C	1	1.00987	0.983302	0.999279	1.00702	0.984062	1.00417	1.00017	1.0085	1.00898	25	35	2	0.00863524	0.0265308	0.175137
C0H480	Protein phosphatase inhibitor 2 OS=Plasmodium falciparum (isolate 3D7) OX=36329 GN=PF3D7_0320000 PE=1 SV=1	37C	1	0.992098	1.0027	1.00679	0.982292	1.01172	0.975971	1.03519	1.02835	1.02275	7	29	2	7.64719	0.64044	3.96246
Q8I567	mRNA methyltransferase, putative OS=Plasmodium falciparum (isolate 3D7) OX=36329 GN=PF3D7_1235500 PE=3 SV=1	37C	1	1.00482	0.975047	0.977234	0.974615	0.973639	0.961005	0.971398	0.987265	0.979948	15	22	2	0.00686816	0.74836	-6.51609
Q8IJ55	Merozoite surface protein 3 OS=Plasmodium falciparum (isolate 3D7) OX=36329 GN=PF3D7_1035400 PE=4 SV=1	37C	1	1.02705	1.01801	1.04557	1.0253	1.02181	1.02143	1.05554	1.08788	1.11952	15	29	2	13.0088	0.874628	1.64945
Q8IJM8	Rhoptry neck protein 12 OS=Plasmodium falciparum (isolate 3D7) OX=36329 GN=PF3D7_1017100 PE=4 SV=1	37C	1	0.988955	1.02874	1.03351	1.0114	1.0125	1.03383	1.03211	0.997973	0.948523	10	45	2	79.7435	0.677158	-2.43623
C6S3C8	Golgi re-assembly stacking protein 1 OS=Plasmodium falciparum (isolate 3D7) OX=36329 GN=PF3D7_1017300.1 PE=4 SV=1	37C	1	1.00938	0.992293	0.992991	1.01003	1.01569	0.995518	1.01799	0.996949	1.05838	15	23	2	97.9378	0.762931	4.47672
Q8I5Y3	Eukaryotic translation initiation factor 3 subunit C OS=Plasmodium falciparum (isolate 3D7) OX=36329 GN=PF3D7_1206200 PE=3 SV=1	37C	1	1.05796	1.04303	1.07495	1.03449	1.04156	1.02456	1.07292	1.07407	1.19702	17	23	2	19.8143	0.647919	1.25919
Q8IM19	Multifunctional methyltransferase subunit TRM112, putative OS=Plasmodium falciparum (isolate 3D7) OX=36329 GN=PF3D7_1407500 PE=3 SV=2	37C	1	0.984618	0.996717	0.992105	0.984038	1.00327	0.96321	1.00533	1.00651	0.97316	7	24	2	0.00295237	0.0497193	0.0265619
C0H5F2	AMMECR1 domain-containing protein OS=Plasmodium falciparum (isolate 3D7) OX=36329 GN=PF3D7_1333400 PE=4 SV=1	37C	1	0.968324	0.948102	0.970066	0.957313	1.01364	0.963384	1.07696	1.10888	1.13765	9	26	2	10.3668	0.911138	4.26595
Q8I2T2	Ubiquitin-like protein, putative OS=Plasmodium falciparum (isolate 3D7) OX=36329 GN=PF3D7_0922100 PE=4 SV=1	37C	1	1.01244	1.01485	1.01432	1.02114	1.02195	1.00277	1.04271	1.0244	1.03309	17	34	2	0.198011	0.500676	0.196388
Q8IEG8	Pinin/SDK/MemA domain-containing protein, putative OS=Plasmodium falciparum (isolate 3D7) OX=36329 GN=PF3D7_1314700 PE=4 SV=1	37C	1	0.985664	0.994913	0.97266	0.989438	0.998344	0.963973	0.980964	1.01838	1.02089	16	28	2	26.0573	0.61836	6.27838
Q8IE69	Dihydrofolate synthase/folylpolyglutamate synthase OS=Plasmodium falciparum (isolate 3D7) OX=36329 GN=PF3D7_1324800 PE=3 SV=1	37C	1	1.01053	1.01811	1.02583	1.01453	0.99262	1.00973	0.975016	0.96497	0.942953	16	27	2	15.061	0.870268	-0.894241
Q8I3T4	FACT complex subunit OS=Plasmodium falciparum (isolate 3D7) OX=36329 GN=PF3D7_0517400 PE=3 SV=1	37C	1	0.983514	0.969432	0.970521	0.996033	0.975344	0.928965	0.977989	1.01653	0.979094	15	24	2	0.163179	0.0939069	0.000135949
Q8IES4	DNA ligase OS=Plasmodium falciparum (isolate 3D7) OX=36329 GN=PF3D7_1304100 PE=3 SV=1	37C	1	1.04191	0.999019	1.01481	1.0079	0.998095	0.999579	1.00305	0.998484	1.00898	16	24	2	0.0360397	0.190985	-1.18683
Q8I610	Threonylcarbamoyl-AMP synthase, putative OS=Plasmodium falciparum (isolate 3D7) OX=36329 GN=PF3D7_1203500 PE=3 SV=1	37C	1	1.03177	0.996388	0.995557	0.998663	1.00862	0.975133	0.986772	0.95575	0.931234	15	25	2	26.0629	0.801989	-0.673162
Q8I490	Uncharacterized protein OS=Plasmodium falciparum (isolate 3D7) OX=36329 GN=PF3D7_0501000 PE=4 SV=1	37C	1	1.15453	1.10413	1.13994	1.15882	1.04107	1.05746	1.01933	1.02252	1.00898	10	46	2	0.571618	0.465604	-3.32485
Q8I445	Uncharacterized protein OS=Plasmodium falciparum (isolate 3D7) OX=36329 GN=PF3D7_0505700 PE=4 SV=1	37C	1	0.976216	0.991863	0.993269	0.990928	0.992432	0.996603	0.969195	1.00634	0.983377	16	27	2	0.26436	0.100717	3.67516e-05
C6KSV4	Transcription elongation factor SPT5, putative OS=Plasmodium falciparum (isolate 3D7) OX=36329 GN=PF3D7_0610900 PE=3 SV=1	37C	1	0.996059	1.00356	1.00445	1.00525	1.00278	1.01747	1.04953	1.05688	1.09659	18	25	2	21.2551	0.966223	0.762103
Q8ILG6	Coatomer subunit beta, putative OS=Plasmodium falciparum (isolate 3D7) OX=36329 GN=PF3D7_1429800 PE=4 SV=2	37C	1	1.07951	1.03728	1.08568	1.08212	1.00953	1.04921	1.00011	1.01341	1.00988	21	24	2	1.90529	0.309409	-1.13461
Q8II42	Nucleic acid binding protein, putative OS=Plasmodium falciparum (isolate 3D7) OX=36329 GN=PF3D7_1132300 PE=4 SV=1	37C	1	1.0172	1.01299	1.0379	1.00079	1.0339	1.00606	1.00226	1.01977	1.00627	11	35	2	0.395035	0.000117728	-0.248322
O77327	Splicing factor 3B subunit 1, putative OS=Plasmodium falciparum (isolate 3D7) OX=36329 GN=PF3D7_0308900 PE=3 SV=1	37C	1	1.00224	0.983375	0.993792	1.00474	0.996676	0.983275	1.02338	1.03517	1.02648	13	18	2	9.30752	0.826933	4.05163
Q8IK49	EMP1-trafficking protein OS=Plasmodium falciparum (isolate 3D7) OX=36329 GN=PF3D7_1478600 PE=4 SV=1	37C	1	1.03083	1.00825	0.995842	1.00323	1.02258	0.99465	1.06413	1.08425	1.09126	22	29	2	10.2642	0.904634	4.24945
Q8ILV1	Serine/threonine-protein phosphatase OS=Plasmodium falciparum (isolate 3D7) OX=36329 GN=PF3D7_1414400 PE=1 SV=1	37C	1	0.948199	0.997857	0.9719	0.985686	1.00851	0.97316	1.02563	1.00409	0.952542	9	29	2	0.202346	0.069048	3.61392
Q8IAU0	Protein phosphatase PPM7, putative OS=Plasmodium falciparum (isolate 3D7) OX=36329 GN=PF3D7_0810500 PE=4 SV=1	37C	1	1.00134	0.982047	0.982493	0.996634	1.0008	0.972137	0.939913	0.905413	0.854103	11	20	2	46.1845	0.971322	-0.775142
Q8IJ27	GDP dissociation inhibitor, putative OS=Plasmodium falciparum (isolate 3D7) OX=36329 GN=PF3D7_1038100 PE=3 SV=1	37C	1	1.06143	0.999922	1.01137	1.01119	1.02236	0.979329	0.953478	0.935918	0.914565	19	34	2	7.31982	0.831293	-0.944186
Q8IJB7	Merozoite TRAP-like protein OS=Plasmodium falciparum (isolate 3D7) OX=36329 GN=PF3D7_1028700 PE=4 SV=1	37C	1	1.01089	0.97507	1.00864	0.982393	1.00938	0.948296	0.954396	0.925663	0.907183	14	27	2	11.7583	0.834887	-0.674524
Q8I3W9	Ras-related protein Rab-1A OS=Plasmodium falciparum (isolate 3D7) OX=36329 GN=PF3D7_0513800 PE=4 SV=1	37C	1	1.01291	0.978585	0.987828	0.985447	1.0055	0.969351	0.95356	0.913045	0.861303	5	39	2	88.5406	0.946628	-0.696139
Q8II71	26S proteasome regulatory subunit RPN7, putative OS=Plasmodium falciparum (isolate 3D7) OX=36329 GN=PF3D7_1129200 PE=4 SV=2	37C	1	1.03359	1.03313	1.03246	1.01802	0.980123	1.02669	0.966394	0.960169	0.885039	11	37	2	36.0018	0.823086	-0.883947
Q8IE02	DNA-(Apurinic or apyrimidinic site) lyase 1, putative OS=Plasmodium falciparum (isolate 3D7) OX=36329 GN=PF3D7_1332600 PE=3 SV=1	37C	1	0.963843	0.975755	0.991751	0.967619	0.994144	0.966322	0.963179	0.967834	0.936667	18	31	2	3.52345	0.470564	-0.164023
Q8I207	PRESAN domain-containing protein OS=Plasmodium falciparum (isolate 3D7) OX=36329 GN=PF3D7_0401800 PE=4 SV=1	37C	1	0.998197	0.993569	0.983666	0.993666	0.976099	0.99173	1.00932	1.04647	1.08915	13	25	2	50.7833	0.957304	1.30467
Q8IIV1	Histone H2B OS=Plasmodium falciparum (isolate 3D7) OX=36329 GN=PF3D7_1105100 PE=3 SV=1	37C	1	0.981692	1.0217	1.00106	0.991695	1.01744	1.00378	1.02824	1.05558	1.08077	8	57	2	16.612	0.849706	1.22867
Q8IAU5	Cullin-1, putative OS=Plasmodium falciparum (isolate 3D7) OX=36329 GN=PF3D7_0811000 PE=3 SV=2	37C	1	0.995363	1.01696	0.999916	1.01162	0.975476	1.00702	0.960083	0.964216	0.902811	21	33	2	80.838	0.832214	-0.781815
Q8I298	StAR-related lipid transfer protein OS=Plasmodium falciparum (isolate 3D7) OX=36329 GN=PF3D7_0104200 PE=4 SV=1	37C	1	1.0712	1.03558	1.05056	1.09373	1.01866	1.03567	0.981783	1.03203	0.957411	8	18	2	3.9826	0.399034	-1.37092
Q8I406	Phosphatidylinositol 4-kinase OS=Plasmodium falciparum (isolate 3D7) OX=36329 GN=PF3D7_0509800 PE=4 SV=1	37C	1	0.987501	0.98989	0.976597	0.975829	0.97339	0.971766	1.02031	1.01547	1.05145	12	22	2	44.3582	0.777939	0.977902
Q8ID50	Ubiquitin OS=Plasmodium falciparum (isolate 3D7) OX=36329 GN=PF3D7_1365900 PE=1 SV=1	37C	1	0.957189	0.984773	0.965723	0.964227	0.973457	0.989632	0.998634	1.00399	1.03214	2	117	2	14.514	0.679559	0.981553
Q8IB66	RNA-binding protein, putative OS=Plasmodium falciparum (isolate 3D7) OX=36329 GN=PF3D7_0823200 PE=4 SV=1	37C	1	0.995462	1.01661	1.0113	1.00187	1.0386	1.04598	1.10886	1.12681	1.124	7	43	2	4.14517	0.967287	1.07674
Q8I2H3	V-type proton ATPase subunit E, putative OS=Plasmodium falciparum (isolate 3D7) OX=36329 GN=PF3D7_0934500 PE=3 SV=2	37C	1	0.978025	1.0435	1.01106	1.00713	0.973328	0.986858	0.937282	0.932262	0.855403	6	21	2	95.3754	0.858552	-0.578775
Q8I3A8	AP-4 complex subunit epsilon, putative OS=Plasmodium falciparum (isolate 3D7) OX=36329 GN=PF3D7_0904100 PE=4 SV=2	37C	1	0.997297	1.01086	1.01884	1.01925	1.01288	1.02347	1.0456	1.05643	1.08494	15	23	2	13.3008	0.926422	0.657235
Q8IL00	Uncharacterized protein OS=Plasmodium falciparum (isolate 3D7) OX=36329 GN=PF3D7_1447200 PE=4 SV=1	37C	1	1.02167	1.0237	1.01109	1.00823	1.021	0.960911	0.966672	0.948025	0.95416	11	20	2	2.0076	0.925304	-5.13842
C0H5L8	U2 small nuclear ribonucleoprotein A', putative OS=Plasmodium falciparum (isolate 3D7) OX=36329 GN=PF3D7_1369700 PE=3 SV=1	37C	1	0.971103	0.975402	0.976358	0.985903	1.01393	1.00744	1.04758	1.05094	1.03499	8	20	2	1.62611	0.853732	0.967264
C0H570	RNA-binding protein, putative OS=Plasmodium falciparum (isolate 3D7) OX=36329 GN=PF3D7_0929200 PE=4 SV=1	37C	1	1.02081	1.00926	1.02124	0.99662	1.03629	0.994623	1.04354	0.962267	0.959863	10	24	2	16.514	0.484015	-2.32965
O77379	26S proteasome non-ATPase regulatory subunit 9, putative OS=Plasmodium falciparum (isolate 3D7) OX=36329 GN=PF3D7_0317800 PE=4 SV=1	37C	1	0.977291	1.00084	0.994665	0.985811	0.977046	0.99706	0.969437	0.985631	1	9	22	2	10.704	0.120296	-0.000181913
Q8II35	Glycine cleavage system H protein OS=Plasmodium falciparum (isolate 3D7) OX=36329 GN=PF3D7_1132900 PE=3 SV=1	37C	1	0.997148	0.986009	0.989696	0.970632	1.01525	0.97119	0.974395	0.930457	0.897047	10	33	2	34.8932	0.869945	-1.24358
Q8IIG8	Protein transport protein SEC16, putative OS=Plasmodium falciparum (isolate 3D7) OX=36329 GN=PF3D7_1119900 PE=4 SV=1	37C	1	0.982574	0.99681	0.965312	0.994648	0.9803	0.999605	0.98637	0.970744	0.935887	16	27	2	91.3772	0.717316	-1.75261
Q8IM10	40S ribosomal protein S8 OS=Plasmodium falciparum (isolate 3D7) OX=36329 GN=PF3D7_1408600 PE=1 SV=1	37C	1	0.955236	1.03767	0.985382	1.0234	0.966444	0.993565	0.950534	0.994594	0.93823	7	23	2	1.61322	0.244323	-1.11042
Q8IEH6	Maf-like protein, putative OS=Plasmodium falciparum (isolate 3D7) OX=36329 GN=PF3D7_1313700 PE=3 SV=2	37C	1	0.95286	0.963369	0.931602	0.926314	0.941433	0.891275	0.909095	0.891996	0.89065	10	29	2	0.131469	0.896991	-0.221728
Q8IAW1	Peptidylprolyl isomerase OS=Plasmodium falciparum (isolate 3D7) OX=36329 GN=PF3D7_0812500 PE=4 SV=1	37C	1	0.978666	1.00869	0.996753	0.991144	0.981439	0.992173	0.990455	1.02436	1.01079	11	15	2	23.0415	0.574143	7.76395
Q8I431	60S ribosomal protein L4 OS=Plasmodium falciparum (isolate 3D7) OX=36329 GN=PF3D7_0507100 PE=1 SV=1	37C	1	0.78563	1.01191	0.835733	0.851589	0.774595	0.798883	0.743768	0.758849	0.723295	12	21	2	1.2877	0.640208	-0.167338
Q8I3Q5	Phosphomethylpyrimidine kinase, putative OS=Plasmodium falciparum (isolate 3D7) OX=36329 GN=PF3D7_0520500 PE=4 SV=1	37C	1	0.993006	0.982517	0.996048	0.996851	0.998773	0.953054	0.904072	0.837325	0.781098	9	20	2	22.9876	0.990882	-0.886254
Q8IJU3	DNA2/NAM7 helicase, putative OS=Plasmodium falciparum (isolate 3D7) OX=36329 GN=PF3D7_1010200 PE=4 SV=2	37C	1	1.01994	0.969482	0.98357	0.97897	0.97956	0.983089	0.972044	0.950128	0.963979	16	18	2	0.686898	0.554103	-0.298432
A0A5K1K868	ATP-dependent RNA helicase DDX23, putative OS=Plasmodium falciparum (isolate 3D7) OX=36329 GN=PF3D7_0518500 PE=4 SV=1	37C	1	0.975677	0.973052	0.967523	0.963214	0.986068	0.98472	1.02585	1.02397	1.03786	13	21	2	5.93149	0.845057	2.74567
Q8IKH5	Serine/threonine-protein phosphatase OS=Plasmodium falciparum (isolate 3D7) OX=36329 GN=PF3D7_1466100 PE=3 SV=1	37C	1	1.02523	1.00067	1.00618	0.993384	0.995624	1.02081	0.983295	0.986446	0.971478	17	22	2	9.46435	0.572689	-5.88126
A0A5K1K8U0	Uncharacterized protein OS=Plasmodium falciparum (isolate 3D7) OX=36329 GN=PF3D7_1359600 PE=4 SV=1	37C	1	0.988597	0.980693	0.986061	0.974204	0.984349	0.980963	0.951115	0.924773	0.933555	21	32	2	9.44604	0.92479	-2.29295
Q8IIL0	Cysteine proteinase falcipain 3 OS=Plasmodium falciparum (isolate 3D7) OX=36329 GN=PF3D7_1115400 PE=3 SV=1	37C	1	0.984925	1.00761	1.00108	0.992707	0.990807	1.01356	1.00429	1.03906	0.989437	13	31	2	1.82051	0.237851	2.41883
O96230	Acyl-CoA synthetase OS=Plasmodium falciparum (isolate 3D7) OX=36329 GN=PF3D7_0215000 PE=4 SV=1	37C	1	1.05385	1.0279	1.04122	1.05919	0.981107	1.02687	0.964326	0.96913	0.934331	14	18	2	8.71234	0.681213	-0.776222
O96265	Small nuclear ribonucleoprotein Sm D2 OS=Plasmodium falciparum (isolate 3D7) OX=36329 GN=PF3D7_0218500 PE=3 SV=1	37C	1	0.988859	0.9811	0.978269	0.977667	0.989582	0.981608	0.981651	0.930461	0.901363	7	15	2	39.8824	0.954251	-2.59199
Q8II11	Uncharacterized protein OS=Plasmodium falciparum (isolate 3D7) OX=36329 GN=PF3D7_1135400 PE=4 SV=1	37C	1	1.01409	1.10866	1.09684	1.04363	1.09798	1.04779	1.02262	0.840402	0.921311	11	28	2	15.2248	0.771238	-6.96292
Q9U0I2	Uncharacterized protein OS=Plasmodium falciparum (isolate 3D7) OX=36329 GN=PF3D7_0410600 PE=4 SV=2	37C	1	1.00555	1.00062	1.02461	0.99891	1.01473	1.02828	1.0572	1.04534	1.05738	9	25	2	3.01535	0.872836	1.96132
Q8I3J8	Uncharacterized protein OS=Plasmodium falciparum (isolate 3D7) OX=36329 GN=PF3D7_0526700 PE=4 SV=1	37C	1	1.00585	0.997915	1.00282	1.04856	0.988858	1.02081	0.974151	0.990412	0.970639	13	18	2	5.81407	0.435572	-9.01239
Q8IEP9	V-type proton ATPase subunit H OS=Plasmodium falciparum (isolate 3D7) OX=36329 GN=PF3D7_1306600 PE=3 SV=2	37C	1	0.973692	1.01633	0.993223	0.993536	0.950147	0.999433	0.956623	0.97925	0.910121	15	29	2	30.7559	0.506908	-0.619869
Q8IBN7	Rhoptry protein, putative OS=Plasmodium falciparum (isolate 3D7) OX=36329 GN=PF3D7_0721400 PE=4 SV=2	37C	1	0.986794	0.964248	0.981839	0.967667	1.01515	0.967398	1.00877	0.992387	1.04364	6	30	2	81.4094	0.515068	4.39979
Q8IIC0	Uncharacterized protein OS=Plasmodium falciparum (isolate 3D7) OX=36329 GN=PF3D7_1124300 PE=4 SV=1	37C	1	0.975886	0.991553	0.98207	0.974878	0.996312	0.999441	1.0031	1.03185	1.0554	14	17	2	36.2057	0.892852	0.93785
A0A5K1K928	Zinc finger protein, putative OS=Plasmodium falciparum (isolate 3D7) OX=36329 GN=PF3D7_1317400 PE=4 SV=1	37C	1	1.00686	0.996098	1.00568	0.99159	1.02047	1.00335	1.02801	1.0184	0.960684	8	31	2	250.415	0.591321	-2.00263
O97244	Activator of Hsp90 ATPase OS=Plasmodium falciparum (isolate 3D7) OX=36329 GN=PF3D7_0306200 PE=3 SV=3	37C	1	1.00464	0.999465	0.995756	1.01514	0.986002	0.994468	0.944503	0.977131	0.936667	10	29	2	4.89242	0.764826	-4.0261
O96191	Uncharacterized protein OS=Plasmodium falciparum (isolate 3D7) OX=36329 GN=PF3D7_0210900 PE=4 SV=1	37C	1	0.984247	1.00335	1.01009	0.990068	1.02833	1.01809	1.03269	1.02488	0.983377	8	23	2	0.0522572	0.195855	0.439479
C6S3F0	Acylphosphatase OS=Plasmodium falciparum (isolate 3D7) OX=36329 GN=PF3D7_1111500 PE=3 SV=1	37C	1	0.983146	0.984558	0.991134	0.97893	0.985505	0.945192	0.930943	0.888663	0.810967	5	26	2	132.028	0.980307	-0.59756
Q7KWJ2	Merozoite surface protein 4 OS=Plasmodium falciparum (isolate 3D7) OX=36329 GN=PF3D7_0207000 PE=4 SV=1	37C	1	1.1592	1.04587	1.10554	1.06579	1.01589	1.00427	0.963153	0.948268	0.843211	9	35	2	10.9256	0.736857	-0.61386
Q8I502	40S ribosomal protein S17, putative OS=Plasmodium falciparum (isolate 3D7) OX=36329 GN=PF3D7_1242700 PE=1 SV=1	37C	1	1.09175	1.1068	1.12961	1.1179	1.06629	1.09845	1.06317	1.08063	1.06946	7	18	2	298.672	0.0234877	-0.614384
Q8II16	Coatomer subunit delta OS=Plasmodium falciparum (isolate 3D7) OX=36329 GN=PF3D7_1134800 PE=3 SV=1	37C	1	1.0402	1.03219	1.04134	1.01016	1.04175	1.02347	1.05209	1.05444	1.06339	12	24	2	0.0537832	0.566445	0.122822
O97336	Uncharacterized protein OS=Plasmodium falciparum (isolate 3D7) OX=36329 GN=PF3D7_0301700 PE=4 SV=2	37C	1	1.08117	1.05222	1.09568	1.10309	1.03296	1.05899	1.01818	1.02461	1.05441	6	21	2	1.85664	0.148418	-1.18828
Q8I5Q3	10 kDa chaperonin OS=Plasmodium falciparum (isolate 3D7) OX=36329 GN=PF3D7_1215300 PE=3 SV=2	37C	1	1.04387	1.00937	1.03506	0.995609	1.04847	0.989289	1.03063	1.02504	1.01444	7	34	2	2.7398	0.106653	-0.00012797
Q9NLB8	EH domain-containing protein OS=Plasmodium falciparum (isolate 3D7) OX=36329 GN=PF3D7_0304200 PE=4 SV=1	37C	1	1.01105	1.02847	1.05518	1.03205	1.03156	1.05023	1.01792	0.994074	0.979948	11	20	2	14.5725	0.536706	-2.88886
Q8I538	Uncharacterized protein OS=Plasmodium falciparum (isolate 3D7) OX=36329 GN=PF3D7_1238500 PE=4 SV=1	37C	1	1.03096	0.979063	1.01755	1.00708	1.01134	0.978326	0.990386	0.963021	1.0117	18	19	2	1.45562	0.282041	-4.01073
C0H5I9	GTP-binding protein, putative OS=Plasmodium falciparum (isolate 3D7) OX=36329 GN=PF3D7_1358900 PE=4 SV=1	37C	1	0.998354	0.993945	0.996914	0.99099	0.995139	1.00271	0.981593	0.971036	0.991182	11	17	2	7.84453	0.622442	-3.72234
Q8IM71	Choline kinase OS=Plasmodium falciparum (isolate 3D7) OX=36329 GN=PF3D7_1401800 PE=1 SV=1	37C	1	0.973946	1.00513	1.0039	0.966852	1.00178	0.995936	0.976891	0.940895	0.889241	12	34	2	61.3485	0.877834	-1.37279
C0H4U4	NPL domain-containing protein OS=Plasmodium falciparum (isolate 3D7) OX=36329 GN=PF3D7_0813300 PE=4 SV=1	37C	1	1.00316	0.993667	1.01063	0.981283	1.00542	0.991761	1.05897	1.08326	1.08809	8	26	2	10.2432	0.957295	4.08323
Q8I6T3	Proteasome subunit beta OS=Plasmodium falciparum (isolate 3D7) OX=36329 GN=PF3D7_1328100 PE=1 SV=1	37C	1	0.965922	1.01277	1.00359	0.975243	0.969152	0.987635	1.00113	1.01952	1.00898	12	57	2	7.31865	0.338891	2.55164
Q7K6B1	Histidine triad nucleotide-binding protein 1 OS=Plasmodium falciparum (isolate 3D7) OX=36329 GN=PF3D7_0817500 PE=4 SV=2	37C	1	1.01608	1.00941	1.04043	0.977606	1.0362	1.00313	1.05512	1.03861	1.06339	9	27	2	3.34948	0.43967	1.17145
Q8IJA0	26S proteasome regulatory subunit RPN9, putative OS=Plasmodium falciparum (isolate 3D7) OX=36329 GN=PF3D7_1030500 PE=3 SV=1	37C	1	1.05948	1.05268	1.04148	1.05439	0.995629	0.991272	0.922022	0.896934	0.822238	8	31	2	26.4785	0.931217	-0.624976
O77306	Serine/threonine protein kinase OS=Plasmodium falciparum (isolate 3D7) OX=36329 GN=PF3D7_0302100 PE=4 SV=1	37C	1	0.977229	0.995322	0.990294	1.01942	0.995048	1.00804	0.954612	0.981107	0.941374	14	19	2	6.77997	0.624659	-6.55346
C0H5L6	Uncharacterized protein OS=Plasmodium falciparum (isolate 3D7) OX=36329 GN=PF3D7_1369400 PE=4 SV=1	37C	1	1.03048	1.03869	1.00519	1.034	0.988828	1.01289	0.978069	1.01092	0.968131	22	28	2	1.81988	0.402792	-0.746427
C6KSU9	RNA-binding protein 25, putative OS=Plasmodium falciparum (isolate 3D7) OX=36329 GN=PF3D7_0610200 PE=4 SV=1	37C	1	1.00387	0.99177	1.01472	0.992154	0.995679	0.966606	0.9283	0.914914	0.932007	22	29	2	3.49574	0.956566	-1.9996
Q8IIU5	Uncharacterized protein OS=Plasmodium falciparum (isolate 3D7) OX=36329 GN=PF3D7_1105800 PE=4 SV=2	37C	1	1.09377	1.05812	1.10048	1.08423	1.03467	1.05548	1.02336	1.04387	1.00447	9	31	2	5.14943	0.271781	-0.918197
C0H4T6	Protein phosphatase PPM5, putative OS=Plasmodium falciparum (isolate 3D7) OX=36329 GN=PF3D7_0810300 PE=3 SV=1	37C	1	1.00466	0.979546	0.978411	0.990551	1.00724	0.99855	1.01827	1.04567	1.05243	12	18	2	9.3229	0.851778	1.11398
Q8IM06	WD repeat-containing protein, putative OS=Plasmodium falciparum (isolate 3D7) OX=36329 GN=PF3D7_1409000 PE=4 SV=1	37C	1	0.965707	0.994822	0.98357	0.989089	0.989615	0.987478	0.99035	0.999882	0.963979	14	26	2	9.66258	0.144596	-3.87241e-05
O77345	26S proteasome regulatory subunit RPN12, putative OS=Plasmodium falciparum (isolate 3D7) OX=36329 GN=PF3D7_0312300 PE=4 SV=1	37C	1	1.08123	1.01223	1.02708	1.05304	0.973618	0.983515	0.780767	0.718327	0.492982	4	19	2	75.8237	0.961707	-0.631343
Q8IK12	Transformer-2 protein homolog beta, putative OS=Plasmodium falciparum (isolate 3D7) OX=36329 GN=PF3D7_1002400.1 PE=4 SV=1	37C	1	1.00707	1.05606	1.02571	1.05001	0.979892	1.01452	1.02164	0.983512	1.09126	9	18	2	9.71099	0.0634781	0.0683905
Q8IAZ3	Eukaryotic translation initiation factor 3 subunit G OS=Plasmodium falciparum (isolate 3D7) OX=36329 GN=PF3D7_0815600 PE=3 SV=2	37C	1	1.02366	1.05444	1.08388	0.96886	1.02154	0.992706	1.02544	0.919554	1.02368	9	14	2	0.106286	0.277493	-3.47573
Q8ILF7	Glutamate dehydrogenase OS=Plasmodium falciparum (isolate 3D7) OX=36329 GN=PF3D7_1430700 PE=1 SV=1	37C	1	0.95844	0.949483	0.922165	0.969328	0.908951	0.935305	0.913459	0.921707	0.880188	10	17	2	1.3368	0.741232	-0.149904
Q8IAY6	Superoxide dismutase [Fe] OS=Plasmodium falciparum (isolate 3D7) OX=36329 GN=SODB PE=1 SV=1	37C	1	0.97658	0.992804	0.980814	0.980337	1.00631	1.0027	1.07961	1.06284	1.08599	5	47	2	4.59909	0.937067	4.34674
Q8IED2	Structural maintenance of chromosomes protein 2 OS=Plasmodium falciparum (isolate 3D7) OX=36329 GN=MAL13P1.96 PE=1 SV=1	37C	1	0.998772	1.01584	1.01482	1.03884	1.00193	1.00222	1.01186	1.04304	1.06038	22	24	2	23.9927	0.668078	4.28272
Q8IIX0	60S acidic ribosomal protein P1, putative OS=Plasmodium falciparum (isolate 3D7) OX=36329 GN=PF3D7_1103100 PE=3 SV=1	37C	1	0.999252	1.02882	1.06173	1.07792	1.0801	1.04215	1.09105	1.05682	1.13996	4	27	2	0.910857	0.647865	0.228644
Q8I542	Calcyclin-binding protein OS=Plasmodium falciparum (isolate 3D7) OX=36329 GN=PF3D7_1238100 PE=4 SV=2	37C	1	1.01145	1.00866	1.02134	1.00529	1.02504	1.01239	1.00592	0.945662	0.935887	9	21	2	26.8799	0.94588	-2.96541
C0H5H1	Zinc finger protein, putative OS=Plasmodium falciparum (isolate 3D7) OX=36329 GN=PF3D7_1344300 PE=4 SV=2	37C	1	0.991209	1.00868	0.991397	0.989341	1.00304	0.983424	0.939467	0.920986	0.879499	15	18	2	27.0888	0.962451	-0.8257
Q8IJT9	Eukaryotic translation initiation factor 2 subunit beta OS=Plasmodium falciparum (isolate 3D7) OX=36329 GN=PF3D7_1010600 PE=3 SV=1	37C	1	0.958991	1.0095	0.997213	0.985941	0.994379	1.00913	1.02239	1.02503	1.04949	14	34	2	4.24287	0.671493	0.875116
O96212	Protein SIS1 OS=Plasmodium falciparum (isolate 3D7) OX=36329 GN=PF3D7_0213100 PE=4 SV=1	37C	1	1.03425	1.03509	1.0586	1.04722	1.07397	1.07372	1.14637	1.14361	1.12625	10	26	2	0.508694	0.881905	0.350169
Q8IM28	ATP-dependent Clp protease regulatory subunit ClpC OS=Plasmodium falciparum (isolate 3D7) OX=36329 GN=PF3D7_1406600 PE=4 SV=1	37C	1	1.0011	1.02116	0.99682	1.02642	0.97189	1.01806	0.994021	0.998892	0.988566	16	17	2	15.802	0.102054	-0.532707
Q8I4Y5	ADP-ribosylation factor GTPase-activating protein OS=Plasmodium falciparum (isolate 3D7) OX=36329 GN=PF3D7_1244600 PE=1 SV=1	37C	1	0.958598	1.05303	1.06224	1.00323	1.04876	1.0266	1.04548	0.912088	1.14577	9	25	2	0.99559	0.0586148	0.184663
Q8I1T8	ATPase ASNA1 homolog OS=Plasmodium falciparum (isolate 3D7) OX=36329 GN=PFD0725c PE=3 SV=1	37C	1	0.988813	1.0097	1.01314	0.987187	1.02376	0.963078	1.00535	0.94882	1.14344	10	19	2	655.598	0.794372	2.5646
Q8IJ89	Uncharacterized protein OS=Plasmodium falciparum (isolate 3D7) OX=36329 GN=PF3D7_1031600 PE=4 SV=1	37C	1	0.969518	0.971871	0.974649	0.980628	0.988909	0.960442	0.945054	0.975354	0.974848	14	17	2	0.0146676	0.392597	-0.0442937
Q8IAT5	Acyl-CoA binding protein, putative OS=Plasmodium falciparum (isolate 3D7) OX=36329 GN=PF3D7_0810000 PE=4 SV=1	37C	1	0.900218	0.973264	0.91574	0.931401	0.95058	0.98188	0.998174	1.00149	0.845749	5	22	2		0.362039	0.000493271
Q8ID62	Exosome complex component RRP45, putative OS=Plasmodium falciparum (isolate 3D7) OX=36329 GN=PF3D7_1364500 PE=3 SV=1	37C	1	0.975821	0.993135	0.989847	0.977349	0.969588	0.972249	0.962231	0.956684	0.95335	11	21	2	0.783133	0.846036	-0.282545
Q8IKB0	HSP20-like chaperone, putative OS=Plasmodium falciparum (isolate 3D7) OX=36329 GN=PF3D7_1472800 PE=4 SV=2	37C	1	0.96651	0.987843	0.982892	0.962953	0.993498	0.989957	1.01432	1.02173	1.05145	14	21	2	25.8676	0.809941	0.814668
Q8I5Z4	O-phosphoseryl-tRNA(Sec) selenium transferase OS=Plasmodium falciparum (isolate 3D7) OX=36329 GN=PF3D7_1205100 PE=3 SV=1	37C	1	0.986406	1.00567	0.996771	0.983187	0.976262	0.975863	0.96111	0.943881	0.901363	14	22	2	50.4794	0.93578	-0.589759
O96252	ATP synthase subunit alpha OS=Plasmodium falciparum (isolate 3D7) OX=36329 GN=PF3D7_0217100 PE=3 SV=1	37C	1	1.03859	1.05428	1.05476	1.05227	1.05416	1.10719	1.11346	1.08237	1.08181	11	16	2	0.020883	0.77732	0.3048
Q8IAM8	Serine/threonine-protein phosphatase OS=Plasmodium falciparum (isolate 3D7) OX=36329 GN=PF3D7_0802800 PE=3 SV=1	37C	1	0.994234	0.983984	0.973033	0.990381	0.965131	0.986022	0.96832	0.985045	0.913821	10	22	2	81.1153	0.793028	-10.1445
Q8IIR4	Tetratricopeptide repeat protein, putative OS=Plasmodium falciparum (isolate 3D7) OX=36329 GN=PF3D7_1108900 PE=4 SV=1	37C	1	0.970741	0.959293	0.955067	0.964946	0.982484	0.988337	1.00882	1.037	1.04267	13	18	2	10.2141	0.842583	1.05577
Q8IKW4	Uncharacterized protein OS=Plasmodium falciparum (isolate 3D7) OX=36329 GN=PF3D7_1451200 PE=4 SV=1	37C	1	0.98054	0.970366	0.960466	0.997861	0.989055	0.979436	0.970725	0.984404	0.986831	14	17	2	8.41692	0.259734	0.000189634
Q8I5E9	Parasitophorous vacuolar protein 2 OS=Plasmodium falciparum (isolate 3D7) OX=36329 GN=PF3D7_1226900 PE=4 SV=1	37C	1	1.06267	1.05624	1.08138	1.06169	0.9979	1.02104	0.973588	0.952499	0.888538	12	20	2	13.2446	0.805258	-0.728628
Q8IDS0	V-type proton ATPase subunit D, putative OS=Plasmodium falciparum (isolate 3D7) OX=36329 GN=PF3D7_1341900 PE=3 SV=1	37C	1	1.02646	1.01731	1.01973	1.00834	1.04371	1.06056	1.10706	1.13826	1.19829	8	21	2	12.7196	0.971496	0.726499
Q9U0N1	Glutamic acid-rich protein GARP OS=Plasmodium falciparum (isolate 3D7) OX=36329 GN=PF3D7_0113000 PE=4 SV=1	37C	1	1.00587	0.994639	0.968384	0.993136	0.990529	0.948142	0.974944	1.01713	1.03404	10	18	2	38.3092	0.519279	3.31547
Q8II00	Signal recognition particle subunit SRP72, putative OS=Plasmodium falciparum (isolate 3D7) OX=36329 GN=PF3D7_1136400 PE=4 SV=1	37C	1	1.07574	1.0068	1.04385	1.07339	1.01241	1.04673	1.00525	0.991696	0.946128	12	15	2	19.4911	0.549075	-1.25321
Q8I3I5	Eukaryotic translation initiation factor 3 subunit E OS=Plasmodium falciparum (isolate 3D7) OX=36329 GN=PF3D7_0528200 PE=3 SV=1	37C	1	1.0236	1.03547	1.04228	1.03428	1.02958	1.03722	1.01655	1.00369	1.00717	12	18	2	13.3656	0.419903	-2.14654
Q8IM55	Serine/threonine protein phosphatase CPPED1, putative OS=Plasmodium falciparum (isolate 3D7) OX=36329 GN=PF3D7_1403900 PE=4 SV=2	37C	1	1.0014	1.00676	1.01811	1.00553	1.01968	0.992762	1.01387	1.02641	1.02182	12	34	2	0.299873	0.316319	0.223443
Q9U0K8	Protein CINCH OS=Plasmodium falciparum (isolate 3D7) OX=36329 GN=PF3D7_0407800 PE=4 SV=1	37C	1	1.00896	1.00205	0.982001	0.995531	0.999829	0.990421	0.989705	0.988583	1.00807	12	17	2		0.131898	-5.09695e-05
Q8IJX4	Uncharacterized protein OS=Plasmodium falciparum (isolate 3D7) OX=36329 GN=PF3D7_1006700 PE=4 SV=2	37C	1	1.02164	1.04241	0.998098	1.03717	0.98111	1.00133	0.973119	0.941163	0.935108	9	18	2	11.2112	0.777973	-0.737081
Q8IL97	Bis(5'-adenosyl)-triphosphatase OS=Plasmodium falciparum (isolate 3D7) OX=36329 GN=PF3D7_1436900 PE=1 SV=1	37C	1	0.978765	0.975578	0.950799	0.964995	0.982798	0.954603	0.967602	0.977726	0.945332	8	18	2	0.0213974	0.480099	-0.0855616
Q8IJH3	Orotidine 5'-phosphate decarboxylase OS=Plasmodium falciparum (isolate 3D7) OX=36329 GN=PF3D7_1023200 PE=1 SV=1	37C	1	0.987712	0.991586	1.00777	0.988669	0.982494	1.06817	1.03847	1.07833	1.04461	10	34	2	1.59134	0.844302	3.47136
Q8IEN8	TOM1-like protein, putative OS=Plasmodium falciparum (isolate 3D7) OX=36329 GN=PF3D7_1307700 PE=4 SV=1	37C	1	1.01027	1.01223	1.03589	1.05354	1.02421	1.00229	0.984432	0.982933	0.968966	12	16	2	3.53957	0.656692	-2.25168
C0H4R3	tRNA pseudouridine synthase, putative OS=Plasmodium falciparum (isolate 3D7) OX=36329 GN=PF3D7_0804600 PE=3 SV=1	37C	1	0.996305	0.993847	0.992154	0.99896	0.997945	0.98333	0.982579	1.00529	1.00178	12	29	2	0.647996	0.0505635	1.87239e-05
Q7K6A5	Multidrug resistance protein 1 OS=Plasmodium falciparum (isolate 3D7) OX=36329 GN=PF3D7_0523000 PE=4 SV=1	37C	1	1.09397	1.05802	1.06209	1.08274	0.988427	1.02438	0.951522	0.990697	1.00717	13	15	2	0.45036	0.568376	-4.24617
C6KSS8	Diphthine methyltransferase, putative OS=Plasmodium falciparum (isolate 3D7) OX=36329 GN=PF3D7_0608000 PE=4 SV=1	37C	1	1.01007	0.966341	0.955108	1.01807	0.984925	0.961563	0.948462	0.94831	0.906452	8	16	2	10.5748	0.638905	-0.713453
C0H4V8	DNA helicase, putative OS=Plasmodium falciparum (isolate 3D7) OX=36329 GN=PF3D7_0818700 PE=4 SV=2	37C	1	1.00875	1.0075	1.00025	1.02135	0.994361	0.988918	0.975372	0.966904	0.948523	18	28	2	9.85716	0.892747	-0.791135
Q8I324	tRNA (adenine(58)-N(1))-methyltransferase non-catalytic subunit TRM6 OS=Plasmodium falciparum (isolate 3D7) OX=36329 GN=PF3D7_0912800 PE=3 SV=1	37C	1	1.01208	0.98888	0.978906	0.986028	0.997754	1.01262	1.04667	0.995279	1.08285	12	16	2	80.0471	0.57008	0.65253
O96210	Arginyl-tRNA--protein transferase OS=Plasmodium falciparum (isolate 3D7) OX=36329 GN=PF3D7_0212900 PE=4 SV=1	37C	1	1.006	0.991272	0.988317	0.985426	0.981497	0.983833	0.950544	0.914044	0.853455	7	16	2	116.041	0.98305	-0.694076
Q8IE81	Uncharacterized protein OS=Plasmodium falciparum (isolate 3D7) OX=36329 GN=PF3D7_1323600 PE=4 SV=1	37C	1	0.994107	0.987543	0.988363	0.970274	0.977046	1.00138	1.0412	1.03402	1.05441	9	31	2	4.75021	0.888922	2.65832
Q8I5F0	Ubiquitinyl hydrolase 1 OS=Plasmodium falciparum (isolate 3D7) OX=36329 GN=PF3D7_1226800 PE=4 SV=1	37C	1	0.987331	1.01267	0.988629	0.992791	0.989194	0.98529	0.981932	0.972981	0.998224	12	21	2	0.288923	0.313237	-1.05267
C0H4F1	FoP domain-containing protein, putative OS=Plasmodium falciparum (isolate 3D7) OX=36329 GN=PF3D7_0519700 PE=4 SV=1	37C	1	0.976891	1.00015	0.957408	0.989571	0.97546	0.969468	0.970213	0.957184	0.912338	10	29	2	25.6967	0.676234	-0.847129
C6KTE1	DUF4205 domain-containing protein OS=Plasmodium falciparum (isolate 3D7) OX=36329 GN=PF3D7_0630600 PE=3 SV=2	37C	1	1.02372	1.02034	1.02273	1.02597	1.0259	1.02062	0.98324	1.01029	1.04074	14	17	2	0.000551843	0.143921	4.05483e-06
Q8ILB6	Mitochondrial acidic protein MAM33, putative OS=Plasmodium falciparum (isolate 3D7) OX=36329 GN=PF3D7_1434800 PE=4 SV=1	37C	1	1.02381	1.0414	1.03603	0.996234	1.0252	1.00018	1.03891	1.04058	1.0654	6	38	2	1.59749	0.290459	0.144361
A0A144A0N0	Vacuolar-sorting protein SNF7, putative OS=Plasmodium falciparum (isolate 3D7) OX=36329 GN=PF3D7_1243500 PE=4 SV=1	37C	1	0.999733	1.02584	1.00141	0.985237	1.03206	1.03307	1.08949	1.12264	1.17205	12	26	2	17.7148	0.956492	0.80036
Q8I6Z4	ABC transporter E family member 1, putative OS=Plasmodium falciparum (isolate 3D7) OX=36329 GN=PF3D7_1368200 PE=4 SV=1	37C	1	0.995522	0.984471	1.02858	0.985903	1.00044	1.01121	1.0181	1.01601	1.03499	15	20	2	4.95414	0.456556	0.887111
O97243	Uncharacterized protein OS=Plasmodium falciparum (isolate 3D7) OX=36329 GN=PF3D7_0306100 PE=4 SV=3	37C	1	0.99386	0.99037	0.975356	1.03167	1.01631	0.997295	1.05359	1.05555	1.02648	8	12	2	1.20714	0.551089	0.677281
A0A5K1K8U1	Voldacs domain-containing protein, putative OS=Plasmodium falciparum (isolate 3D7) OX=36329 GN=PF3D7_1333800 PE=4 SV=1	37C	1	0.974132	1.01908	1.00272	1.00031	1.00749	1.01033	1.03495	1.05737	1.03025	8	20	2	4.98505	0.691299	1.93657
A0A5K1K7X4	Early transcribed membrane protein 5 OS=Plasmodium falciparum (isolate 3D7) OX=36329 GN=PF3D7_0532100 PE=4 SV=1	37C	1	1.05843	1.00695	1.04851	1.04241	0.991227	0.959592	0.921632	0.829052	0.815675	3	18	2	11.202	0.942333	-0.823844
C6KT56	Signal recognition particle subunit SRP68, putative OS=Plasmodium falciparum (isolate 3D7) OX=36329 GN=PF3D7_0621900 PE=3 SV=1	37C	1	1.04256	1.01342	1.01602	1.03623	1.01171	1.00682	0.939451	0.921057	0.830746	14	25	2	28.1157	0.932007	-0.886804
Q8I3P8	Uncharacterized protein OS=Plasmodium falciparum (isolate 3D7) OX=36329 GN=PF3D7_0521400 PE=4 SV=1	37C	1	1.04825	1.03356	1.03963	1.03688	1.02166	1.03446	1.01277	1.01278	1.00627	10	16	2	7.68213	0.340792	-1.36013
Q8IKB2	Protein disulfide-isomerase OS=Plasmodium falciparum (isolate 3D7) OX=36329 GN=PF3D7_1472600 PE=4 SV=1	37C	1	1.00319	0.982478	0.9885	0.985878	0.996658	0.999186	1.01076	1.04033	1.02555	9	15	2	13.0659	0.832258	3.69906
O97279	Uncharacterized protein OS=Plasmodium falciparum (isolate 3D7) OX=36329 GN=PF3D7_0319900 PE=4 SV=1	37C	1	1.03796	1.01697	1.03349	1.04225	1.03229	1.01985	0.980498	1.01316	0.992933	9	31	2	4.08707	0.5165	-2.92792
Q8I319	Uncharacterized protein OS=Plasmodium falciparum (isolate 3D7) OX=36329 GN=PF3D7_0913300 PE=4 SV=1	37C	1	0.999743	0.998762	0.996785	0.999116	1.03421	0.982932	1.01728	1.01524	1.0117	14	20	2	2.34131	0.148966	0.319873
Q8IM03	DNA damage-inducible protein 1, putative OS=Plasmodium falciparum (isolate 3D7) OX=36329 GN=PF3D7_1409300 PE=3 SV=1	37C	1	0.978929	1.01204	1.00164	0.984905	1.00779	1.00915	1.01033	1.00936	0.982517	12	30	2	0.0144718	0.0473828	0.600943
Q8IHU8	OTU domain-containing protein, putative OS=Plasmodium falciparum (isolate 3D7) OX=36329 GN=PF3D7_1141700 PE=4 SV=1	37C	1	0.994049	0.978227	0.99007	0.993883	0.990333	1.00305	1.01112	1.04587	1.01904	11	25	2	8.58663	0.769597	1.67328
C6S3E1	Protein phosphatase 1 regulatory subunit 22 OS=Plasmodium falciparum (isolate 3D7) OX=36329 GN=PF3D7_1032800 PE=3 SV=1	37C	1	0.994937	1.01013	1.01738	0.99316	1.01173	0.991455	1.00048	1.0072	0.950127	11	28	2	83.5137	0.765421	-4.08382
Q8I3I6	AP complex subunit beta OS=Plasmodium falciparum (isolate 3D7) OX=36329 GN=PF3D7_0528100 PE=3 SV=2	37C	1	1.05147	1.05518	1.08948	1.05633	1.02141	1.01951	0.999179	1.02727	1.08599	13	17	2	1.36825	0.194871	-0.000123599
Q8II27	RNA (Uracil-5-)methyltransferase, putative OS=Plasmodium falciparum (isolate 3D7) OX=36329 GN=PF3D7_1133800 PE=3 SV=2	37C	1	1.03286	1.01644	0.996914	1.0196	1.01799	1.02646	1.06307	1.12544	1.09552	15	23	2	12.0743	0.906756	2.73422
Q7KQK5	Apical membrane antigen 1 OS=Plasmodium falciparum (isolate 3D7) OX=36329 GN=PF3D7_1133400 PE=1 SV=1	37C	1	1.04916	1.02083	1.03963	1.04656	1.00066	1.05004	0.980289	1.01278	1.00627	8	14	2	6.27822	0.310312	-3.71095
Q8IL71	Vesicle-associated membrane protein, putative OS=Plasmodium falciparum (isolate 3D7) OX=36329 GN=PF3D7_1439800 PE=4 SV=1	37C	1	1.00524	1.01045	1.00799	1.00557	1.02894	0.983863	0.962779	0.926894	0.852807	5	19	2	60.8364	0.960229	-0.895966
Q8IIE7	Serine/threonine protein kinase, putative OS=Plasmodium falciparum (isolate 3D7) OX=36329 GN=PF3D7_1121900 PE=4 SV=1	37C	1	0.99937	0.952689	0.984736	0.991449	0.991004	0.971862	0.973964	0.949716	0.944538	12	22	2	7.43823	0.548723	-1.05645
Q8IDC0	Zinc finger protein, putative OS=Plasmodium falciparum (isolate 3D7) OX=36329 GN=PF3D7_1358500 PE=3 SV=1	37C	1	0.999753	1.00457	0.996645	1.01284	0.989938	1.03022	1.04209	1.06624	1.05938	13	22	2	4.66078	0.918447	1.44865
A0A144A0M2	Uncharacterized protein OS=Plasmodium falciparum (isolate 3D7) OX=36329 GN=PF3D7_1128000.2 PE=4 SV=1	37C	1	1.03703	0.992015	1.01556	1.02307	1.00806	1.01354	1.02112	1.01531	0.991182	17	19	2	0.424584	0.00867355	-0.516788
Q8I526	ATP-dependent zinc metalloprotease FTSH 1 OS=Plasmodium falciparum (isolate 3D7) OX=36329 GN=PF3D7_1239700 PE=3 SV=1	37C	1	1.00154	0.990137	0.987317	0.997964	1.00935	1.03475	1.05119	1.0933	1.12625	15	21	2	16.4745	0.982363	0.743791
O96142	Aspartate aminotransferase OS=Plasmodium falciparum (isolate 3D7) OX=36329 GN=PF3D7_0204500 PE=1 SV=1	37C	1	0.979711	0.982589	0.990305	0.979385	0.995181	0.987846	0.958283	0.910301	0.869296	12	35	2	34.8535	0.97394	-1.30737
Q8ILQ3	Uncharacterized protein OS=Plasmodium falciparum (isolate 3D7) OX=36329 GN=PF3D7_1419700 PE=4 SV=1	37C	1	0.976833	1.03671	0.980474	0.969858	0.951334	0.936953	0.905533	0.893238	0.896332	7	19	2	1.18033	0.881726	-0.66501
Q8IKS3	AP-1 complex subunit gamma, putative OS=Plasmodium falciparum (isolate 3D7) OX=36329 GN=PF3D7_1455500 PE=4 SV=1	37C	1	1.06814	1.08137	1.12652	1.10252	1.07989	1.09162	1.11309	1.14442	1.2073	15	21	2	0.298122	0.742595	0.148825
Q8IK74	PRESAN domain-containing protein OS=Plasmodium falciparum (isolate 3D7) OX=36329 GN=PF3D7_1476300 PE=4 SV=1	37C	1	1.02558	1.01967	1.01093	1.00675	0.987852	1.01309	1.01805	1.07144	1.03594	12	19	2	15.0716	0.621188	2.09003
Q8I3G7	Uncharacterized protein OS=Plasmodium falciparum (isolate 3D7) OX=36329 GN=PF3D7_0530000 PE=4 SV=1	37C	1	0.976155	0.953371	0.964546	0.936013	0.965532	0.901994	0.92889	0.958828	0.946128	7	23	2	0.00525445	0.559983	-0.579549
Q8IET1	LisH domain-containing protein, putative OS=Plasmodium falciparum (isolate 3D7) OX=36329 GN=PF3D7_1303400 PE=4 SV=1	37C	1	0.97875	0.990135	0.979796	0.997367	0.983622	0.995911	1.03234	1.07918	1.08077	17	26	2	13.1403	0.968904	2.07435
Q8IEP3	DnaJ protein, putative OS=Plasmodium falciparum (isolate 3D7) OX=36329 GN=PF3D7_1307200 PE=4 SV=1	37C	1	0.979959	0.991171	0.967724	0.970886	0.988454	0.977371	0.959532	0.987251	0.937448	11	31	2	2.92134	0.424409	-0.166534
C0H4T9	CCR4-associated factor 1 OS=Plasmodium falciparum (isolate 3D7) OX=36329 GN=PF3D7_0811300 PE=4 SV=1	37C	1	0.971784	0.984771	0.978557	0.99897	0.999189	0.987707	0.999714	1.03559	1.06138	13	23	2	32.9943	0.885473	1.67888
C6KSR7	Glutaredoxin-like protein OS=Plasmodium falciparum (isolate 3D7) OX=36329 GN=PF3D7_0606900 PE=4 SV=1	37C	1	1.01294	0.996699	0.980272	0.992462	0.993805	0.990989	0.984858	0.994142	0.963979	4	23	2	3.59342	0.436122	-0.289812
C6KSX9	Syntaxin-binding protein, putative OS=Plasmodium falciparum (isolate 3D7) OX=36329 GN=PF3D7_0613700 PE=3 SV=1	37C	1	1.02248	1.04245	1.04601	1.04367	1.00872	1.00815	0.968762	0.979331	0.934331	11	15	2	10.2825	0.784401	-0.794653
Q8IKM7	Uncharacterized protein OS=Plasmodium falciparum (isolate 3D7) OX=36329 GN=PF3D7_1460500 PE=4 SV=1	37C	1	0.970516	0.982464	0.979096	0.992715	1.00373	0.970264	0.98919	0.962317	0.990308	16	22	2	0.389405	0.170542	-0.000121977
Q8I390	Coatomer subunit beta' OS=Plasmodium falciparum (isolate 3D7) OX=36329 GN=PF3D7_0905900 PE=3 SV=1	37C	1	1.07025	1.06686	1.12126	1.09992	1.04485	1.0577	0.998525	0.985996	0.939799	13	18	2	11.5796	0.662723	-1.0995
Q9U0I0	Uncharacterized protein OS=Plasmodium falciparum (isolate 3D7) OX=36329 GN=PF3D7_0410800 PE=4 SV=1	37C	1	1.01091	1.02264	0.987682	1.01016	0.999527	0.999917	1.00301	0.974473	0.99469	15	20	2	3.93827	0.315525	-0.856887
Q7KWJ1	Acyl carrier protein OS=Plasmodium falciparum (isolate 3D7) OX=36329 GN=PF3D7_0208500 PE=3 SV=1	37C	1	0.98049	0.999327	1.00031	0.967418	1.02313	1.00029	1.05113	1.03883	1.06038	6	28	2	4.48424	0.739502	1.04729
A0A144A3A5	Transcription initiation TFIID-like, putative OS=Plasmodium falciparum (isolate 3D7) OX=36329 GN=PF3D7_1428800.2 PE=4 SV=1	37C	1	1.01243	0.969931	1.01555	0.998461	0.989828	0.972418	0.928486	0.900372	0.919052	10	16	2	5.23092	0.89793	-1.63136
Q5MYR6	1-cys peroxiredoxin OS=Plasmodium falciparum (isolate 3D7) OX=36329 GN=prx PE=1 SV=1	37C	1	0.956581	0.973126	0.94638	0.924102	0.899859	0.825821	0.76962	0.730715	0.758947	8	22	2	1.57103	0.975633	-0.736639
C0H4U9	EF-hand calcium-binding domain-containing protein, putative OS=Plasmodium falciparum (isolate 3D7) OX=36329 GN=PF3D7_0816400 PE=4 SV=1	37C	1	0.980099	0.978889	0.989473	0.987987	1.01235	1.01647	1.06411	1.09496	1.09766	10	30	2	6.85756	0.97128	0.985703
Q8IDD9	E2 ubiquitin-conjugating enzyme OS=Plasmodium falciparum (isolate 3D7) OX=36329 GN=PF3D7_1356300 PE=3 SV=1	37C	1	1.01368	1.00032	0.9849	0.976149	1.03499	1.01405	1.10215	1.17041	1.14928	7	19	2	9.57017	0.94424	2.20327
Q8IHQ8	Ribosome assembly protein 4, putative OS=Plasmodium falciparum (isolate 3D7) OX=36329 GN=PF3D7_1146000 PE=4 SV=1	37C	1	0.985366	0.968593	0.968551	0.978558	0.978886	0.98299	1.019	1.05578	1.05838	14	19	2	12.5733	0.932418	2.36209
Q8I5H7	GTP cyclohydrolase 1 OS=Plasmodium falciparum (isolate 3D7) OX=36329 GN=PF3D7_1224000 PE=3 SV=1	37C	1	0.996977	1.00705	1.0091	0.997021	0.99996	1.03979	1.08325	1.09891	1.05441	9	19	2	3.15268	0.911215	2.95054
Q8ILA7	Ataxin-2 like protein, putative OS=Plasmodium falciparum (isolate 3D7) OX=36329 GN=PF3D7_1435700.1 PE=4 SV=2	37C	1	0.949868	0.968074	0.955602	0.936487	0.957986	0.945339	0.973094	0.941544	0.95335	9	13	2	3.31979e+44	0.634751	0.00808447
Q8I5M9	PPPDE peptidase domain-containing protein, putative OS=Plasmodium falciparum (isolate 3D7) OX=36329 GN=PF3D7_1217900 PE=3 SV=1	37C	1	1.01405	0.988753	0.981915	1.03425	0.985101	0.987185	0.98893	0.993331	0.926628	6	14	2	72.8968	0.662335	-7.32847
C0H4V4	Rhoptry neck protein 5 OS=Plasmodium falciparum (isolate 3D7) OX=36329 GN=PF3D7_0817700 PE=4 SV=1	37C	1	1.03751	1.08174	1.05514	1.10644	1.02847	1.07341	1.03149	1.07189	1.0756	15	19	2	3.72173e+09	0.39352	-0.0153539
Q8IBF3	Uncharacterized protein OS=Plasmodium falciparum (isolate 3D7) OX=36329 GN=PF3D7_0730800.1 PE=4 SV=1	37C	1	1.0045	1.01976	1.01133	0.980396	0.989987	0.963433	0.991509	0.926725	1.06339	7	15	2	0.033866	0.018135	0.18198
C6KTA9	E3 ubiquitin-protein ligase RNF5, putative OS=Plasmodium falciparum (isolate 3D7) OX=36329 GN=PF3D7_0627300 PE=4 SV=1	37C	1	1.00643	1.01503	0.973199	0.994478	0.999487	0.991821	1.01255	1.0102	0.992933	10	14	2	6.49791e+17	5.25582e-05	-0.0167457
Q8ID28	26S proteasome regulatory subunit RPN11 OS=Plasmodium falciparum (isolate 3D7) OX=36329 GN=PF3D7_1368100 PE=4 SV=1	37C	1	1.0673	1.05008	1.07868	1.06181	1.00309	1.04283	1.0085	1.01397	0.966466	10	21	2	12.1593	0.469554	-0.701298
Q8IDQ2	Kelch protein K13 OS=Plasmodium falciparum (isolate 3D7) OX=36329 GN=PF3D7_1343700 PE=1 SV=1	37C	1	0.908151	0.988072	0.974354	0.947266	0.963787	1.00317	1.10957	1.02948	1.17328	11	19	2	3.80037	0.714811	4.83749
Q8I1T2	Nuclear cap-binding protein subunit 2 OS=Plasmodium falciparum (isolate 3D7) OX=36329 GN=PF3D7_0415500 PE=3 SV=1	37C	1	0.997219	0.98686	1.00017	0.976697	1.00687	0.966044	0.96421	0.92051	0.927393	8	20	2	10.658	0.868208	-1.1036
A0A144A0F5	Uncharacterized protein OS=Plasmodium falciparum (isolate 3D7) OX=36329 GN=PF3D7_1149100.2 PE=4 SV=1	37C	1	1.00907	0.959071	0.989985	0.95316	0.983291	0.957318	0.914881	0.862892	0.798295	7	13	2	87.6155	0.942174	-0.608326
Q8IDF2	Uncharacterized protein OS=Plasmodium falciparum (isolate 3D7) OX=36329 GN=PF3D7_1354900 PE=4 SV=1	37C	1	0.988614	0.975681	0.969125	0.98141	1.00705	0.954125	1.00939	1.00379	1.01536	14	23	2	2.17295	0.215327	0.753441
Q8IDR5	Casein kinase II subunit beta OS=Plasmodium falciparum (isolate 3D7) OX=36329 GN=PF3D7_1342400 PE=3 SV=1	37C	1	0.983942	0.985947	0.996181	1.00825	1.01057	0.981323	1.06723	1.08066	1.10196	10	15	2	10.1126	0.939814	5.1162
Q8IIR9	Casein kinase 2, alpha subunit OS=Plasmodium falciparum (isolate 3D7) OX=36329 GN=PF3D7_1108400 PE=1 SV=1	37C	1	1.07055	1.02252	1.05267	1.03859	1.02882	0.990756	0.97209	0.973034	0.945332	9	23	2	2.69995	0.763892	-1.36024
C6S3B2	Merozoite surface protein 5 OS=Plasmodium falciparum (isolate 3D7) OX=36329 GN=PF3D7_0206900.2 PE=4 SV=1	37C	1	1.03669	1.02641	1.0113	1.02266	1.01984	1.0188	1.03997	1.02303	1.02555	5	10	2		0.0175874	-2.41982e-05
Q8IDY3	MSP7-like protein OS=Plasmodium falciparum (isolate 3D7) OX=36329 GN=PF3D7_1334500 PE=4 SV=2	37C	1	1.0613	1.03782	1.08624	1.09827	1.03468	1.01215	1.00428	0.995352	1.03594	9	15	2	0.823744	0.382972	-3.32228
Q8IAX1	PUB domain-containing protein, putative OS=Plasmodium falciparum (isolate 3D7) OX=36329 GN=PF3D7_0813500 PE=4 SV=1	37C	1	0.995589	1.0119	0.995737	0.995826	1.00934	0.997151	1.00353	1.01833	1.03214	14	20	2	43.1215	0.779893	1.9171
Q8IL58	60S ribosomal protein L1, putative OS=Plasmodium falciparum (isolate 3D7) OX=36329 GN=PF3D7_1441200 PE=4 SV=1	37C	1	1.01235	1.01743	1.03996	0.992125	0.99804	0.968486	0.964921	0.93955	0.928926	5	23	2	4.886	0.872155	-0.686273
O97238	Transporter, putative OS=Plasmodium falciparum (isolate 3D7) OX=36329 GN=PF3D7_0305300 PE=4 SV=3	37C	1	1.00436	0.996967	0.994994	1.01499	1.04113	1.01243	1.04614	1.02544	1.00988	8	18	2	0.170084	0.59703	2.51375
O77314	CLP1 P-loop domain-containing protein, putative OS=Plasmodium falciparum (isolate 3D7) OX=36329 GN=PF3D7_0303100 PE=4 SV=1	37C	1	0.999206	1.02545	1.02924	1.01269	1.03569	1.05319	1.0507	1.04006	1.08809	13	17	2	1.58948	0.771427	0.296826
Q8IHR6	Coatomer subunit gamma OS=Plasmodium falciparum (isolate 3D7) OX=36329 GN=PF3D7_1145100 PE=3 SV=1	37C	1	1.05828	1.079	1.06719	1.05366	0.997543	1.0503	1.01499	1.02594	0.982517	15	18	2	5.32753	0.313204	-0.642656
Q8III8	Uncharacterized protein OS=Plasmodium falciparum (isolate 3D7) OX=36329 GN=PF3D7_1118000 PE=4 SV=1	37C	1	1.02508	0.999587	1.00412	1.01293	1.00742	0.968422	0.991901	0.988155	0.944538	8	23	2	25.07	0.627877	-0.510371
Q8I3Y0	Orotate phosphoribosyltransferase OS=Plasmodium falciparum (isolate 3D7) OX=36329 GN=PF3D7_0512700 PE=3 SV=1	37C	1	1.02489	1.0023	1.04835	0.986366	1.00785	0.989543	0.977508	0.934375	0.90865	8	26	2	20.9739	0.837213	-0.854668
Q8IJZ9	U5 small nuclear ribonucleoprotein component, putative OS=Plasmodium falciparum (isolate 3D7) OX=36329 GN=PF3D7_1003800 PE=3 SV=1	37C	1	1.00234	1.00386	0.989249	1.00908	1.00101	1.02532	1.02168	1.03561	1.02089	13	20	2	1.60844	0.805375	3.06055
C0H4K6	E3 ubiquitin-protein ligase OS=Plasmodium falciparum (isolate 3D7) OX=36329 GN=PF3D7_0704600 PE=4 SV=1	37C	1	0.997148	1.01891	0.959519	1.00607	0.991602	0.988207	1.00066	1.00243	1.04655	15	19	2	11.6805	0.3098	1.43846
Q8IHQ2	Oocyst rupture protein 1, putative OS=Plasmodium falciparum (isolate 3D7) OX=36329 GN=PF3D7_1146600 PE=3 SV=1	37C	1	0.947857	0.942293	0.923825	0.940057	0.954822	0.931179	0.919851	0.950711	0.913079	13	21	2	0.00289031	0.733321	-0.0571695
Q8IDK8	Nucleoside diphosphate hydrolase, putative OS=Plasmodium falciparum (isolate 3D7) OX=36329 GN=PF3D7_1349100 PE=4 SV=1	37C	1	0.95586	0.97628	0.969362	0.958478	0.985231	0.979526	1.08176	1.13085	1.17696	12	27	2	12.7221	0.963	1.45419
A0A5K1K8S2	Uncharacterized protein OS=Plasmodium falciparum (isolate 3D7) OX=36329 GN=PF3D7_1350500 PE=4 SV=1	37C	1	1.00068	1.01784	0.992173	1.0064	0.997343	1.00607	1.03499	1.00399	1.06138	16	20	2	28.6527	0.545966	0.781242
Q8IJN3	Serine/threonine protein kinase, FIKK family OS=Plasmodium falciparum (isolate 3D7) OX=36329 GN=PF3D7_1016400 PE=4 SV=2	37C	1	1.07098	1.07203	1.07546	1.06324	1.00439	1.0035	0.965852	0.904639	0.95335	6	10	2	3.15554	0.782683	-0.992431
Q8IHS2	SUMO-activating enzyme subunit 1 OS=Plasmodium falciparum (isolate 3D7) OX=36329 GN=PF3D7_1144500 PE=4 SV=1	37C	1	0.980499	0.982589	0.996996	0.980905	0.98158	0.975182	0.956632	0.942227	0.869296	8	22	2	98.2351	0.945777	-0.960909
Q8I630	GPN-loop GTPase 1 OS=Plasmodium falciparum (isolate 3D7) OX=36329 GN=PF3D7_1201500 PE=3 SV=1	37C	1	1.02423	0.996747	0.996075	1.00303	1.00498	0.983009	0.966705	0.977726	0.945332	13	20	2	9.48206	0.780692	-0.610445
Q8IL13	ATP-dependent RNA helicase DDX5, putative OS=Plasmodium falciparum (isolate 3D7) OX=36329 GN=PF3D7_1445900 PE=2 SV=2	37C	1	1.02461	1.00411	1.02557	1.021	1.03878	1.03096	1.02716	1.01247	1.0293	15	19	2		0.0324736	-3.51617e-05
Q8ILJ4	Uncharacterized protein OS=Plasmodium falciparum (isolate 3D7) OX=36329 GN=PF3D7_1427000 PE=4 SV=1	37C	1	1.00882	0.983979	0.999727	0.992116	1.00722	0.999297	1.00326	0.999127	1.02089	15	16	2	2.19393	0.236291	0.598363
Q8I240	Bromodomain protein, putative OS=Plasmodium falciparum (isolate 3D7) OX=36329 GN=PF3D7_0110500 PE=1 SV=1	37C	1	1.03009	0.982696	0.978846	1.00194	1.00297	1.00055	0.941574	0.933416	0.932007	15	16	2	8.66437	0.838208	-4.97834
Q8IK09	Uncharacterized protein OS=Plasmodium falciparum (isolate 3D7) OX=36329 GN=PF3D7_1002700 PE=4 SV=1	37C	1	1.02737	1.01544	1.00412	1.04528	0.975464	0.972914	0.947981	0.946729	0.910121	13	16	2	4.94963	0.828932	-0.715914
C6KTC9	Polyadenylate-binding protein 3, putative OS=Plasmodium falciparum (isolate 3D7) OX=36329 GN=PF3D7_0629400 PE=4 SV=1	37C	1	0.994129	0.968426	0.950252	0.996004	0.965807	0.948119	0.931375	0.890644	0.861963	9	15	2	19.9525	0.894084	-0.663513
C6KSQ9	Negative elongation factor E OS=Plasmodium falciparum (isolate 3D7) OX=36329 GN=PF3D7_0606100 PE=3 SV=1	37C	1	0.958257	0.991772	0.97523	0.948013	0.975381	0.955467	0.973602	0.96361	0.957411	13	19	2		0.0893371	7.88585e-05
Q8IJJ2	Uncharacterized protein OS=Plasmodium falciparum (isolate 3D7) OX=36329 GN=PF3D7_1021100 PE=4 SV=2	37C	1	1.01807	0.987177	0.988574	0.986785	0.974364	1.0038	1.02037	1.01767	1.02836	18	26	2	3.81008	0.595429	2.77391
Q8I416	Pre-mRNA-processing ATP-dependent RNA helicase PRP5, putative OS=Plasmodium falciparum (isolate 3D7) OX=36329 GN=PF3D7_0508700 PE=4 SV=1	37C	1	1.03493	1.032	0.982495	1.0184	1.00127	0.996211	1.01529	1.01219	1.03214	13	15	2	95.3267	0.0628015	-0.000109001
Q8IIU6	RNA-splicing ligase RtcB homolog OS=Plasmodium falciparum (isolate 3D7) OX=36329 GN=RTCB PE=3 SV=1	37C	1	1.04178	1.00146	1.00328	1.01396	1.02212	1.05129	0.969654	1.00262	0.925865	11	16	2	53.7175	0.56198	-1.21196
Q8II81	Multiprotein-bridging factor 1, putative OS=Plasmodium falciparum (isolate 3D7) OX=36329 GN=PF3D7_1128200 PE=4 SV=1	37C	1	0.963606	1.01796	1.02186	0.981281	1.04048	1.02743	1.08171	1.0789	1.08915	8	23	2	2.87795	0.788394	0.744748
Q8IAP4	GTPase-activating protein, putative OS=Plasmodium falciparum (isolate 3D7) OX=36329 GN=PF3D7_0804900 PE=4 SV=1	37C	1	1.00494	1.01706	1.01597	1.03331	1.00961	1.03049	1.062	1.00519	1.10196	11	20	2	15.9484	0.478087	0.372544
Q8IKQ7	MA3 domain-containing protein, putative OS=Plasmodium falciparum (isolate 3D7) OX=36329 GN=PF3D7_1457300 PE=3 SV=1	37C	1	1.03396	1.01796	1.00602	1.0206	0.983243	1.0635	1.14621	1.24421	1.18816	12	28	2	7.24162	0.943263	1.75397
Q8I423	Merozoite surface protein P38 OS=Plasmodium falciparum (isolate 3D7) OX=36329 GN=PFS38 PE=1 SV=1	37C	1	1.08221	1.01598	1.02472	1.06322	0.980474	0.999046	0.896477	0.862776	0.788772	10	27	2	20.6359	0.905306	-0.715628
Q8I5B3	Protein transport protein SEC13 OS=Plasmodium falciparum (isolate 3D7) OX=36329 GN=PF3D7_1230700 PE=3 SV=1	37C	1	1.04121	1.015	1.04351	1.01087	1.01831	0.974907	0.837985	0.741639	0.586027	6	16	2	33.318	0.985214	-0.82945
Q8I3A4	Prefoldin subunit 4 OS=Plasmodium falciparum (isolate 3D7) OX=36329 GN=PF3D7_0904500 PE=3 SV=1	37C	1	1.04115	1.0157	1.03127	0.999914	1.038	0.993478	0.994606	0.957484	1.06238	6	20	2	1709.05	0.0239149	-1.64407e-05
Q8IEJ4	Uncharacterized protein OS=Plasmodium falciparum (isolate 3D7) OX=36329 GN=PF3D7_1312800 PE=4 SV=1	37C	1	1.00482	0.983758	0.996056	0.971341	0.990629	0.969399	0.999976	0.98848	1.04171	13	17	2	165.183	0.660225	4.29117
Q8IE67	Phosphoribosylpyrophosphate synthetase OS=Plasmodium falciparum (isolate 3D7) OX=36329 GN=PF3D7_1325100 PE=3 SV=1	37C	1	0.970786	0.988829	0.964784	0.992663	0.995881	1.05429	1.20096	1.3603	1.35422	8	13	2	9.86544	0.992335	1.45738
Q8I1N9	Zinc finger protein, putative OS=Plasmodium falciparum (isolate 3D7) OX=36329 GN=PF3D7_0420000 PE=4 SV=1	37C	1	0.988584	0.982164	0.964593	0.986545	0.97788	0.976269	0.976096	0.947023	0.959863	17	21	2	1.3358	0.641856	-0.186833
Q8I3X5	CPSF_A domain-containing protein OS=Plasmodium falciparum (isolate 3D7) OX=36329 GN=PF3D7_0513200 PE=4 SV=1	37C	1	1.01733	1.03169	0.983475	1.04112	0.993733	0.974521	0.966982	0.992755	0.959863	18	19	2	0.781936	0.57529	-5.0681
Q8I5L7	Formin 2 OS=Plasmodium falciparum (isolate 3D7) OX=36329 GN=PF3D7_1219000 PE=4 SV=1	37C	1	0.997169	0.969096	0.9783	0.988674	1.0543	0.96539	0.991784	1.02225	1.04558	16	20	2	50.9994	0.346719	1.75642
O97255	Uncharacterized protein OS=Plasmodium falciparum (isolate 3D7) OX=36329 GN=PF3D7_0307700 PE=4 SV=2	37C	1	0.974415	0.980647	0.971211	0.998377	0.980401	0.980419	0.981123	0.990207	0.964807	13	20	2	0.0443622	0.312039	-0.00960952
Q8IE00	Eukaryotic translation initiation factor 6 OS=Plasmodium falciparum (isolate 3D7) OX=36329 GN=EIF6 PE=3 SV=1	37C	1	1.01287	1.00552	1.00264	0.990687	0.961462	0.963137	0.888869	0.882005	0.779473	5	13	2	86.7361	0.963032	-0.49988
Q8I5U6	Uncharacterized protein OS=Plasmodium falciparum (isolate 3D7) OX=36329 GN=PF3D7_1210300 PE=4 SV=1	37C	1	0.992374	0.969882	0.957726	0.97494	0.960656	1.01393	1.03143	1.07303	1.04753	7	16	2	4.7779	0.835362	1.61009
Q8I5L8	WD repeat-containing protein, putative OS=Plasmodium falciparum (isolate 3D7) OX=36329 GN=PF3D7_1218900 PE=4 SV=1	37C	1	1.02371	0.979914	1.00577	1.02411	1.02585	0.995062	1.008	1.0269	1.03978	11	19	2	0.527319	0.232984	0.284064
C0H4C7	Mediator of RNA polymerase II transcription subunit 11, putative OS=Plasmodium falciparum (isolate 3D7) OX=36329 GN=PF3D7_0505900 PE=4 SV=1	37C	1	1.00775	1.00881	1.01521	0.995838	1.02644	1.00183	1.02604	1.02542	1.03309	6	21	2	0.776899	0.485659	0.301108
Q8I5A3	Asparagine-rich protein, putative OS=Plasmodium falciparum (isolate 3D7) OX=36329 GN=PF3D7_1231800 PE=4 SV=1	37C	1	0.978908	0.982149	0.979725	0.992604	1.00325	1.0019	1.03146	1.05047	1.07663	16	20	2	16.1463	0.950101	0.761407
Q8IKD9	Uncharacterized protein OS=Plasmodium falciparum (isolate 3D7) OX=36329 GN=PF3D7_1469800 PE=4 SV=2	37C	1	0.963082	0.986376	0.981096	0.96042	0.958611	0.92779	0.950992	0.955869	0.963979	7	14	2	0.0159344	0.574558	-0.426318
Q8IKV4	Aminomethyltransferase, putative OS=Plasmodium falciparum (isolate 3D7) OX=36329 GN=PF3D7_1452200 PE=4 SV=1	37C	1	0.992838	0.975084	0.983448	1.00409	0.998681	0.999896	0.991611	1.00992	0.995571	11	16	2	0.097115	0.379067	5.13768
Q8III4	Haloacid dehalogenase-like hydrolase, putative OS=Plasmodium falciparum (isolate 3D7) OX=36329 GN=PF3D7_1118400 PE=4 SV=1	37C	1	1.00989	0.974811	0.982619	0.97915	1.00031	0.971368	0.969975	1.00299	0.922824	12	21	2	17.2888	0.335036	-0.433142
Q8IKE9	Splicing factor U2AF large subunit, putative OS=Plasmodium falciparum (isolate 3D7) OX=36329 GN=PF3D7_1468800 PE=4 SV=1	37C	1	0.995042	0.985542	1.00573	0.978901	0.98812	1.0074	0.99652	1.02325	0.979948	11	17	2	1.51696	0.12524	5.02888
Q8IDI8	Uncharacterized protein OS=Plasmodium falciparum (isolate 3D7) OX=36329 GN=PF3D7_1351100 PE=1 SV=1	37C	1	0.981844	0.996765	0.976815	0.979848	1.01022	0.97655	0.990227	1.01148	0.95416	7	22	2	92.2359	0.0718664	-0.0771459
O96245	MtN3-like protein OS=Plasmodium falciparum (isolate 3D7) OX=36329 GN=PF3D7_0216600 PE=3 SV=1	37C	1	1.00855	0.96706	0.988137	1.03532	1.00886	1.04155	1.01958	1.08867	1.04558	10	20	2	1.58627	0.59706	0.602431
Q8II01	Tudor staphylococcal nuclease OS=Plasmodium falciparum (isolate 3D7) OX=36329 GN=PF3D7_1136300 PE=4 SV=1	37C	1	1.03437	1.02823	1.05472	1.04069	0.98995	1.03698	1.02193	1.03146	1.06038	16	17	2	0.0808334	0.238565	0.0322048
Q8I4T6	THO complex subunit 2, putative OS=Plasmodium falciparum (isolate 3D7) OX=36329 GN=PF3D7_1249800 PE=4 SV=1	37C	1	1.04454	1.05065	1.03889	1.05889	1.01421	1.051	1.03159	1.01423	1.04267	14	18	2	584.085	0.400046	-0.000117873
Q8IES1	PUB domain-containing protein, putative OS=Plasmodium falciparum (isolate 3D7) OX=36329 GN=PF3D7_1304400 PE=4 SV=1	37C	1	1.01994	0.994729	1.00279	1.01731	0.988961	1.00618	1.02118	1.05914	1.05441	12	16	2	14.1983	0.839359	2.4067
Q9U0H1	DNA polymerase OS=Plasmodium falciparum (isolate 3D7) OX=36329 GN=PF3D7_0411900 PE=3 SV=2	37C	1	0.987453	1.02092	1.01288	0.983187	0.986874	0.987434	0.962569	0.9333	0.942163	14	14	2	7.00697	0.829493	-0.883717
Q8IE26	PITH domain-containing protein, putative OS=Plasmodium falciparum (isolate 3D7) OX=36329 GN=PF3D7_1330000.1 PE=4 SV=1	37C	1	0.961479	0.992378	0.995747	1.00935	1.03705	1.02137	1.0858	1.08026	1.15046	9	14	2	6.82087	0.887817	0.550269
Q8IBL1	Uncharacterized protein OS=Plasmodium falciparum (isolate 3D7) OX=36329 GN=PF3D7_0724100 PE=4 SV=1	37C	1	1.00098	0.991513	1.0074	0.999541	1.00381	1.01045	1.05366	1.0709	1.0998	11	20	2	15.3385	0.975446	0.994084
Q8ID24	Mitochondrial import inner membrane translocase subunit TIM9, putative OS=Plasmodium falciparum (isolate 3D7) OX=36329 GN=PF3D7_1368600 PE=4 SV=1	37C	1	1.02246	1.02484	1.01124	1.01399	1.03423	0.998153	0.996848	0.922511	0.926628	5	13	2	18.8447	0.922344	-3.22012
Q8IE18	RNA-binding protein, putative OS=Plasmodium falciparum (isolate 3D7) OX=36329 GN=PF3D7_1330800 PE=4 SV=1	37C	1	0.983812	1.03666	1.04251	1.01266	1.00101	1.01603	1.02943	1.01534	1.02089	10	18	2	0.0592975	0.119513	0.097893
Q8IIL5	Non-specific serine/threonine protein kinase OS=Plasmodium falciparum (isolate 3D7) OX=36329 GN=PF3D7_1114700 PE=3 SV=2	37C	1	1.01544	1.02954	1.01651	1.0188	1.04523	1.00719	1.00313	1.00823	0.992933	10	14	2	2.54947	0.369713	-2.76927
Q8IDR9	40S ribosomal protein S6 OS=Plasmodium falciparum (isolate 3D7) OX=36329 GN=PF3D7_1342000 PE=1 SV=1	37C	1	1.02585	1.06999	1.08484	1.04303	1.05729	1.07291	1.07548	1.07254	1.08599	7	19	2	0.00375171	0.795675	2.29038
Q8I5V6	U6 snRNA-associated Sm-like protein LSm7, putative OS=Plasmodium falciparum (isolate 3D7) OX=36329 GN=PF3D7_1209200 PE=3 SV=1	37C	1	0.973579	0.978867	0.972852	0.978127	0.972018	0.985722	1.01049	1.00945	0.963979	4	12	2	9.25159	0.108993	4.20855e-05
Q8ILL1	Enoyl-CoA hydratase, putative OS=Plasmodium falciparum (isolate 3D7) OX=36329 GN=PF3D7_1425200 PE=4 SV=1	37C	1	0.97601	0.948807	0.927106	0.962013	0.994428	0.966926	1.01527	1.07805	1.05243	10	15	2	12.7038	0.784362	3.61881
C0H4E7	SWIB/MDM2 domain-containing protein OS=Plasmodium falciparum (isolate 3D7) OX=36329 GN=PF3D7_0518200 PE=4 SV=1	37C	1	1.00524	1.01666	1.04124	1.05186	1.07128	1.06545	1.10273	1.14534	1.24612	5	15	2	10.8699	0.901741	0.493168
Q8ILQ6	Uncharacterized protein OS=Plasmodium falciparum (isolate 3D7) OX=36329 GN=PF3D7_1419400 PE=4 SV=2	37C	1	0.96429	1.01208	0.973347	0.980548	0.981416	0.992341	1.03573	0.989922	1.00537	17	21	2	3.72613	0.31815	3.70786
Q8II26	Uncharacterized protein OS=Plasmodium falciparum (isolate 3D7) OX=36329 GN=PF3D7_1133900 PE=4 SV=2	37C	1	0.987627	1.0463	0.998794	1.00874	0.949266	0.996029	0.92852	0.923522	0.913079	15	18	2	5.14615	0.732911	-0.638664
Q8I669	EMP1-trafficking protein OS=Plasmodium falciparum (isolate 3D7) OX=36329 GN=PF3D7_0202200 PE=4 SV=1	37C	1	1.21752	1.09201	1.15458	1.1582	1.05889	1.10599	1.09853	1.15071	1.17696	7	15	2	45.7773	0.45528	-0.000140887
Q8I1Y2	Cathepsin J OS=Plasmodium falciparum (isolate 3D7) OX=36329 GN=PF3D7_0404700 PE=3 SV=2	37C	1	0.993949	0.980835	0.999323	0.99269	1.02513	1.01357	1.02034	1.00684	0.987698	12	14	2	0.312487	0.401707	4.61058
Q8I569	CCR4-NOT transcription complex subunit 4, putative OS=Plasmodium falciparum (isolate 3D7) OX=36329 GN=PF3D7_1235300 PE=4 SV=1	37C	1	0.984233	0.989196	0.991512	0.984952	0.989325	0.99866	0.985803	0.988469	1.00898	16	25	2	99.0287	0.551311	7.78278
O77313	Vesicle-fusing ATPase OS=Plasmodium falciparum (isolate 3D7) OX=36329 GN=PF3D7_0303000 PE=3 SV=1	37C	1	0.973696	0.977615	0.97261	0.951817	0.94095	0.962453	0.93103	0.957349	0.943745	11	14	2	0.014359	0.769972	-0.45521
Q8IAX2	Translation initiation factor SUI1, putative OS=Plasmodium falciparum (isolate 3D7) OX=36329 GN=PF3D7_0813600 PE=4 SV=1	37C	1	0.99284	0.988574	1.0062	0.994269	1.01953	0.96331	0.961543	0.96385	0.904992	7	14	2	61.9382	0.794062	-0.687135
C0H5L9	Membrane associated histidine-rich protein 1 OS=Plasmodium falciparum (isolate 3D7) OX=36329 GN=PF3D7_1370300 PE=4 SV=1	37C	1	1.26911	1.11924	1.28291	1.1947	1.02514	1.1065	0.986487	0.971243	1.02461	7	17	2	0.46021	0.461526	-4.69948
Q8I300	Ribonuclease H2 subunit C, putative OS=Plasmodium falciparum (isolate 3D7) OX=36329 GN=PF3D7_0915200 PE=4 SV=1	37C	1	1.0081	0.990736	0.987059	0.991965	0.996238	1.00702	1.00816	1.03896	1.00357	10	16	2	4.38624	0.48492	1.42639
Q8I3J4	Ubiquitin-conjugating enzyme E2 N, putative OS=Plasmodium falciparum (isolate 3D7) OX=36329 GN=PF3D7_0527100 PE=1 SV=1	37C	1	0.961182	0.946578	0.939819	0.95867	0.971165	0.960104	0.990152	0.989032	0.966466	7	33	2	5.51685	0.222115	3.70397
Q8IHS1	Transcription initiation factor IIF subunit beta, putative OS=Plasmodium falciparum (isolate 3D7) OX=36329 GN=PF3D7_1144600 PE=4 SV=1	37C	1	1.0209	1.03666	1.01376	1.02758	1.02392	1.03887	1.04214	1.04219	1.05738	11	18	2	0.152491	0.763027	0.180783
Q8IDB3	Riboflavin kinase OS=Plasmodium falciparum (isolate 3D7) OX=36329 GN=PF3D7_1359100 PE=4 SV=1	37C	1	1.01269	0.975884	0.980293	1.01037	1.01255	0.996788	0.949215	0.962321	0.887836	11	16	2	128.816	0.804251	-0.832769
Q8I485	Rhoptry-associated protein 3 OS=Plasmodium falciparum (isolate 3D7) OX=36329 GN=PF3D7_0501500 PE=4 SV=1	37C	1	1.07952	1.0614	1.10171	1.0837	1.00391	1.04281	0.989301	0.945051	0.965636	10	18	2	5.88629	0.644895	-1.01629
Q8IJ34	ADP/ATP translocase OS=Plasmodium falciparum (isolate 3D7) OX=36329 GN=PF3D7_1037300 PE=3 SV=1	37C	1	1.04199	1.11627	1.1558	1.10542	0.965729	1.07484	1.00131	0.862374	0.867954	12	21	2	15.2748	0.69774	-3.78866
C0H4Y9	U6 snRNA-associated Sm-like protein LSm8 OS=Plasmodium falciparum (isolate 3D7) OX=36329 GN=LSM8 PE=3 SV=1	37C	1	1.02264	1.0238	1.07246	1.01877	1.0193	1.03431	1.06535	0.99651	0.992056	3	6	2	2.14792	0.0394672	-0.690074
Q8IHY4	Uncharacterized protein OS=Plasmodium falciparum (isolate 3D7) OX=36329 GN=PF3D7_1138000 PE=4 SV=1	37C	1	1.01139	0.998438	0.988187	1.03083	1.00527	1.04827	1.06823	1.02832	1.04753	16	16	2	1.56171	0.694924	3.3465
A0A5K1K977	Translation initiation factor eIF-2B subunit gamma, putative OS=Plasmodium falciparum (isolate 3D7) OX=36329 GN=PF3D7_1326400 PE=4 SV=1	37C	1	1.00276	1.00505	1.01585	1.00411	1.0065	1.02165	1.00668	0.994004	0.996454	13	21	2	0.20446	0.00248492	-0.255318
C6KSM5	Geranylgeranyl transferase type-2 subunit beta OS=Plasmodium falciparum (isolate 3D7) OX=36329 GN=PF3D7_0602500 PE=3 SV=1	37C	1	1.03005	0.985875	1.00381	1.0304	1.02769	1.14984	0.917562	0.897969	0.856707	9	23	2	8.8309	0.691526	-4.80708
Q8I3A2	Bacterial histone-like protein OS=Plasmodium falciparum (isolate 3D7) OX=36329 GN=PF3D7_0904700 PE=3 SV=1	37C	1	0.940149	1.02731	0.908176	0.994055	0.896456	0.936436	0.912958	0.982842	0.955782	6	13	2	0.0786307	0.140308	-0.0688297
Q8ILK4	DUF383 domain-containing protein OS=Plasmodium falciparum (isolate 3D7) OX=36329 GN=PF3D7_1425900 PE=4 SV=2	37C	1	0.993933	0.980264	1.00287	0.986457	0.999793	1.0212	1.16189	1.2109	1.24612	9	17	2	8.33513	0.991627	1.89091
Q8ID74	Bifunctional polynucleotide phosphatase/kinase OS=Plasmodium falciparum (isolate 3D7) OX=36329 GN=PF3D7_1363200 PE=4 SV=1	37C	1	1.01344	0.959759	1.00246	0.976023	1.00196	1.01321	0.99628	1.01608	1.02368	14	18	2	0.937208	0.307691	2.0263
C6KT90	Uncharacterized protein OS=Plasmodium falciparum (isolate 3D7) OX=36329 GN=PF3D7_0625400 PE=4 SV=1	37C	1	1.00848	1.01702	1.02072	1.01159	1.00606	0.994717	0.939612	0.90345	0.902087	12	23	2	8.70733	0.986014	-1.70888
C0H5G9	TLD domain-containing protein, putative OS=Plasmodium falciparum (isolate 3D7) OX=36329 GN=PF3D7_1344100 PE=4 SV=1	37C	1	0.9612	1.00741	0.992347	1.03037	0.999213	1.02704	0.983421	0.942371	0.980803	12	13	2	12.8783	0.401785	-3.80187
Q8IBJ1	Ubiquitin carboxyl-terminal hydrolase, putative OS=Plasmodium falciparum (isolate 3D7) OX=36329 GN=PF3D7_0726500 PE=4 SV=1	37C	1	1.0058	1.02452	0.993294	1.03771	0.972531	1.01495	0.98734	1.04554	1.03882	15	18	2	0.498349	0.0988297	0.220031
O97241	Ubiquitin-conjugating enzyme E2, putative OS=Plasmodium falciparum (isolate 3D7) OX=36329 GN=PF3D7_0305700 PE=1 SV=1	37C	1	0.976751	1.03103	1.03176	1.00801	1.01126	0.994295	1.00118	0.972113	0.915309	5	35	2	61.1199	0.772552	-2.60972
Q8I3L9	50S ribosomal protein L12, apicoplast, putative OS=Plasmodium falciparum (isolate 3D7) OX=36329 GN=PF3D7_0524600 PE=3 SV=1	37C	1	1.02505	1.04167	1.07882	1.0285	1.02208	1.04705	1.11108	1.05417	1.12625	6	11	2	0.954171	0.522927	0.21356
A0A143ZXH0	Uncharacterized protein OS=Plasmodium falciparum (isolate 3D7) OX=36329 GN=PF3D7_1351800.2 PE=4 SV=1	37C	1	0.999434	1.01108	1.01677	1.00639	1.01121	1.00736	0.984207	1.00546	0.982517	3	13	2	5.14424	0.499552	-3.60668
Q8IIF0	Exported protein 1 OS=Plasmodium falciparum (isolate 3D7) OX=36329 GN=PF3D7_1121600 PE=4 SV=1	37C	1	1.08618	1.11999	1.1125	1.16859	0.981633	1.07232	0.940302	0.988204	0.879499	5	26	2	7.84114	0.576796	-0.828224
A0A5K1K8M0	Uncharacterized protein OS=Plasmodium falciparum (isolate 3D7) OX=36329 GN=PF3D7_1338700 PE=4 SV=1	37C	1	1.09885	1.00233	0.998954	1.00103	1.03117	0.996095	1.04175	1.01443	1.07354	13	19	2	0.00248124	0.0649389	-0.0145283
Q8IBP3	Inosine triphosphate pyrophosphatase OS=Plasmodium falciparum (isolate 3D7) OX=36329 GN=MAL7P1.110 PE=3 SV=1	37C	1	1.03923	1.00492	1.03405	1.00855	1.02913	1.00235	1.04062	1.02357	0.966466	7	27	2	122.805	0.542444	-3.61528
O96217	Uncharacterized protein OS=Plasmodium falciparum (isolate 3D7) OX=36329 GN=PF3D7_0213700 PE=3 SV=1	37C	1	1.01353	1.00582	1.05977	0.993787	1.04025	1.01335	1.02984	0.946255	1.00988	6	18	2	20.5095	0.307756	-3.87744
Q8I4S1	dTMP kinase OS=Plasmodium falciparum (isolate 3D7) OX=36329 GN=PF3D7_1251300 PE=1 SV=1	37C	1	0.959944	1.00399	1.00182	0.978871	0.996776	1.00729	1.00633	1.00987	0.986831	10	33	2	0.152021	0.138668	0.735837
Q7KQK3	Heat shock protein DNAJ homologue Pfj4 OS=Plasmodium falciparum (isolate 3D7) OX=36329 GN=PF3D7_1211400 PE=4 SV=1	37C	1	1.00213	0.983667	0.99135	1.02747	0.980638	1.00841	1.00348	0.98543	1.03309	9	16	2	11.4076	0.105624	0.496962
Q8IM69	Uncharacterized protein OS=Plasmodium falciparum (isolate 3D7) OX=36329 GN=PF3D7_1402000 PE=4 SV=2	37C	1	0.976072	0.963965	0.939841	0.98156	0.982703	0.975213	0.963071	0.994772	0.929694	12	27	2	0.187237	0.222957	-0.0389342
Q8IKX4	Signal recognition particle 54 kDa protein OS=Plasmodium falciparum (isolate 3D7) OX=36329 GN=PF3D7_1450100 PE=3 SV=1	37C	1	1.01903	1.02481	1.02666	1.03243	1.02424	1.02163	1.03382	0.993914	1.00537	9	14	2	30.9985	0.371812	-1.67549
Q8IJC4	Methyltransferase, putative OS=Plasmodium falciparum (isolate 3D7) OX=36329 GN=PF3D7_1028000 PE=4 SV=2	37C	1	1.00095	0.96781	0.959072	0.976322	0.98311	0.959946	0.949665	0.958133	0.871994	9	12	2	70.9296	0.787181	-4.70951
Q8IDG9	Uncharacterized protein OS=Plasmodium falciparum (isolate 3D7) OX=36329 GN=PF3D7_1353100 PE=4 SV=1	37C	1	1.14639	1.11673	1.13368	1.15545	1.04111	1.05807	1.01803	1.04936	1.15164	8	33	2	471.202	0.261542	-0.000132191
Q8IER6	MCL1 domain-containing protein, putative OS=Plasmodium falciparum (isolate 3D7) OX=36329 GN=PF3D7_1305000 PE=4 SV=1	37C	1	0.99516	0.990085	0.989336	1.01281	1.01408	1.00357	1.03405	1.0647	1.09232	15	17	2	26.5745	0.94807	0.894805
A0A5K1K969	Uncharacterized protein OS=Plasmodium falciparum (isolate 3D7) OX=36329 GN=PF3D7_1339700 PE=4 SV=1	37C	1	0.993057	0.979804	0.964381	1.00046	0.959097	0.976053	0.943633	0.924072	0.897764	11	17	2	30.2887	0.859586	-0.590146
Q9U0N4	Multidrug resistance-associated protein 1 OS=Plasmodium falciparum (isolate 3D7) OX=36329 GN=PF3D7_0112200 PE=4 SV=1	37C	1	1.11739	1.08836	1.10639	1.11983	1.02797	1.10125	1.11011	1.14836	1.22041	18	22	2	0.305334	0.530444	0.119069
A0A144A3R0	Queuine tRNA-ribosyltransferase, putative OS=Plasmodium falciparum (isolate 3D7) OX=36329 GN=PF3D7_1434100 PE=4 SV=1	37C	1	0.963051	0.997299	0.965139	0.984166	1.00137	0.996962	1.08424	1.11677	1.11952	8	18	2	8.01415	0.9539	2.30345
Q8IC26	Phosphoinositide-binding protein, putative OS=Plasmodium falciparum (isolate 3D7) OX=36329 GN=PF3D7_0704400 PE=4 SV=1	37C	1	0.995953	0.974888	0.972162	0.99706	1.01289	1.00132	1.0321	0.99916	1.05738	10	16	2	28.6442	0.577392	0.488777
A0A144A2T4	1-deoxy-D-xylulose-5-phosphate reductoisomerase OS=Plasmodium falciparum (isolate 3D7) OX=36329 GN=PF3D7_1467300 PE=3 SV=1	37C	1	0.961219	0.975084	0.969824	0.967511	0.988296	0.960916	1.00201	1.02969	0.995571	13	16	2	10.1915	0.578326	4.40413
Q8IHT3	DNA-directed RNA polymerases I and III subunit RPAC1, putative OS=Plasmodium falciparum (isolate 3D7) OX=36329 GN=PF3D7_1143300 PE=4 SV=1	37C	1	1.00697	1.00435	1.01915	1.01818	1.00354	1.01306	0.991262	0.96911	0.952542	9	11	2	21.7542	0.908086	-1.53773
Q8IEF7	tRNA (adenine(58)-N(1))-methyltransferase OS=Plasmodium falciparum (isolate 3D7) OX=36329 GN=PF3D7_1315700 PE=3 SV=1	37C	1	1.01806	0.98044	0.991406	1.00401	1.01123	1.04514	1.03775	1.03245	1.03499	8	11	2	0.951442	0.786354	2.61007
Q8I2T9	NifU-like scaffold protein OS=Plasmodium falciparum (isolate 3D7) OX=36329 GN=PF3D7_0921400 PE=3 SV=1	37C	1	0.992693	0.972498	0.942477	0.991942	0.993577	0.990656	1.06628	1.05208	1.00089	3	8	2	4.70683	0.587273	5.28096
Q8IJU4	PI31 domain-containing protein, putative OS=Plasmodium falciparum (isolate 3D7) OX=36329 GN=PF3D7_1010100 PE=4 SV=1	37C	1	1.00389	0.935225	0.927486	0.979545	0.982474	0.983664	1.02968	1.03198	1.04074	5	14	2	5.49785	0.59971	2.24336
C0H4N2	Uncharacterized protein OS=Plasmodium falciparum (isolate 3D7) OX=36329 GN=PF3D7_0717200 PE=4 SV=1	37C	1	0.958814	0.982813	0.93168	0.957092	0.99043	1.04625	1.00053	1.0402	0.962329	12	26	2	0.761981	0.393657	4.23362
Q8IKI5	Ribonuclease Z, putative OS=Plasmodium falciparum (isolate 3D7) OX=36329 GN=PF3D7_1465300 PE=4 SV=1	37C	1	0.998323	1.00259	1.00391	1.00971	1.00246	0.98304	1.04359	1.10706	1.08285	9	10	2	12.9876	0.952596	4.29894
C0H4X2	RWD domain-containing protein, putative OS=Plasmodium falciparum (isolate 3D7) OX=36329 GN=PF3D7_0823100 PE=4 SV=1	37C	1	0.968551	0.986836	0.974444	0.985705	0.956187	0.964907	0.967894	0.955598	0.959863	9	14	2	0.0267524	0.671316	-0.168439
Q8ILU8	Small nuclear ribonucleoprotein-associated protein B, putative OS=Plasmodium falciparum (isolate 3D7) OX=36329 GN=PF3D7_1414800 PE=4 SV=1	37C	1	1.06098	1.0492	1.06886	1.0266	1.07197	1.06565	1.12065	1.085	1.10304	8	11	2	0.0599432	0.688873	0.169714
Q8I6Z7	Dual 3',5'-cyclic-AMP and -GMP phosphodiesterase beta OS=Plasmodium falciparum (isolate 3D7) OX=36329 GN=PDEbeta PE=1 SV=1	37C	1	1.00753	1.02053	1.00001	1.01725	1.00815	1.00047	1.02826	1.08223	1.05243	8	17	2	14.8217	0.85973	3.39213
Q8IKP4	Exonuclease V, mitochondrial, putative OS=Plasmodium falciparum (isolate 3D7) OX=36329 GN=PF3D7_1458700 PE=3 SV=1	37C	1	0.998016	0.997147	1.01701	0.993294	1.01448	1.02825	1.03233	1.06144	1.05047	10	13	2	4.19312	0.880019	0.83441
Q8I2X7	Pre-mRNA-splicing factor ATP-dependent RNA helicase PRP43, putative OS=Plasmodium falciparum (isolate 3D7) OX=36329 GN=PF3D7_0917600 PE=4 SV=1	37C	1	0.977716	1.02182	0.965731	0.990423	0.977046	0.985804	1.00243	1.00378	1.03404	9	11	2	21.8347	0.417751	1.36458
O97266	Eukaryotic translation initiation factor 4E OS=Plasmodium falciparum (isolate 3D7) OX=36329 GN=PF3D7_0315100 PE=3 SV=1	37C	1	1.00063	0.995598	1.01162	0.990851	1.03145	1.02916	1.14686	1.18772	1.25167	9	29	2	12.8168	0.977475	0.999452
Q7KQL1	Pre-mRNA-splicing factor CEF1, putative OS=Plasmodium falciparum (isolate 3D7) OX=36329 GN=PF3D7_1033600 PE=3 SV=1	37C	1	0.963624	1.00799	0.937719	0.985772	0.961632	0.994762	0.983989	1.02961	0.985101	11	13	2	3.09128	0.191156	2.21223
A0A140KXW6	Elongation factor Tu OS=Plasmodium falciparum (isolate 3D7) OX=36329 GN=PF3D7_API02900 PE=3 SV=1	37C	1	0.970301	1.00186	1.0231	1.00756	1.00037	1.04978	1.01823	1.01731	1.03214	6	8	2	0.0483715	0.463393	0.746552
A0A144A3E6	Protein-L-isoaspartate(D-aspartate) O-methyltransferase, putative OS=Plasmodium falciparum (isolate 3D7) OX=36329 GN=PF3D7_1432700 PE=3 SV=1	37C	1	1.01158	1.01358	0.996768	1.01139	1.00608	1.0371	1.07817	1.13509	1.15164	4	11	2	12.6393	0.989356	1.12827
Q8IIT1	Intu_longin_1 domain-containing protein OS=Plasmodium falciparum (isolate 3D7) OX=36329 GN=PF3D7_1107200 PE=3 SV=2	37C	1	0.956695	1.04843	0.951235	0.988339	0.967659	0.970728	0.960977	0.991913	0.981659	14	16	2		0.000128516	-5.1143e-06
Q8I3N0	DnaJ protein, putative OS=Plasmodium falciparum (isolate 3D7) OX=36329 GN=PF3D7_0523400 PE=4 SV=2	37C	1	1.01339	1.01263	1.1133	1.05736	0.933134	0.97911	0.924195	0.912404	0.902087	11	11	2	0.498936	0.708334	-7.26406
Q8IB48	Uncharacterized protein OS=Plasmodium falciparum (isolate 3D7) OX=36329 GN=PF3D7_0821400 PE=4 SV=1	37C	1	0.968529	1.02669	1.00508	0.965601	1.00088	0.963556	0.969188	0.929715	0.913821	7	25	2	9.01223	0.703368	-0.736913
Q8I1Q5	Eukaryotic translation initiation factor 3 subunit M OS=Plasmodium falciparum (isolate 3D7) OX=36329 GN=PF3D7_0418200 PE=3 SV=1	37C	1	1.07241	1.05282	1.07323	1.07015	1.03613	1.09829	1.00752	1.06028	1.01444	12	20	2	84.577	0.271348	-0.000106232
Q8IJC6	60S ribosomal protein L3 OS=Plasmodium falciparum (isolate 3D7) OX=36329 GN=PF3D7_1027800 PE=1 SV=1	37C	1	1.07107	1.04714	1.1042	1.09733	1.04149	1.04867	1.05034	1.04501	0.988566	8	14	2	13.8168	0.257177	-0.925918
O96219	RTR1 domain-containing protein, putative OS=Plasmodium falciparum (isolate 3D7) OX=36329 GN=PF3D7_0213900 PE=3 SV=1	37C	1	1.00061	1.00542	0.972588	1.03465	1.01144	1.00684	1.00366	1.03611	1.01444	13	18	2	0.103455	0.342159	2.50582
O77358	Trafficking protein particle complex subunit OS=Plasmodium falciparum (isolate 3D7) OX=36329 GN=PF3D7_0310700 PE=3 SV=2	37C	1	0.979924	1.00245	1.02008	0.99126	1.00914	1.00479	1.00784	1.00267	1.02555	9	17	2	0.621816	0.260085	0.361561
C0H4X4	Uncharacterized protein OS=Plasmodium falciparum (isolate 3D7) OX=36329 GN=PF3D7_0824200 PE=4 SV=1	37C	1	0.991949	0.987314	0.990165	0.995835	0.973694	0.9866	0.967468	0.970221	0.963979	15	19	2	0.879789	0.773265	-0.344114
Q8I5V5	Probable cytosolic iron-sulfur protein assembly protein CIAO1 homolog OS=Plasmodium falciparum (isolate 3D7) OX=36329 GN=PF3D7_1209400 PE=3 SV=1	37C	1	0.982682	0.980377	0.985891	0.984084	1.01631	1.01131	1.0146	1.05045	1.02648	11	14	2	2.11206	0.769161	0.785957
Q8II64	Major facilitator superfamily-related transporter, putative OS=Plasmodium falciparum (isolate 3D7) OX=36329 GN=PF3D7_1129900 PE=4 SV=1	37C	1	1.21334	1.15	1.20787	1.16962	1.06675	1.12357	1.05019	1.09784	1.12176	14	22	2	0.38497	0.174026	-3.40962
Q8I3Z3	MORN repeat protein, putative OS=Plasmodium falciparum (isolate 3D7) OX=36329 GN=PF3D7_0511300 PE=4 SV=2	37C	1	0.978844	0.981066	0.982437	0.988589	0.977046	0.992537	1.00175	0.999189	1.0293	14	15	2	48.1309	0.740348	0.900516
Q8I0X1	2-oxoisovalerate dehydrogenase subunit beta, mitochondrial, putative OS=Plasmodium falciparum (isolate 3D7) OX=36329 GN=PF3D7_0504600 PE=4 SV=1	37C	1	1.00058	0.987763	1.03269	0.988865	1.0101	0.998977	0.972135	0.980343	0.927393	7	14	2	43.1978	0.69888	-0.918115
Q8II23	Protein disulfide isomerase OS=Plasmodium falciparum (isolate 3D7) OX=36329 GN=PF3D7_1134100 PE=4 SV=1	37C	1	1.01326	1.01848	1.04502	1.01633	1.03285	1.04072	1.04625	1.05298	1.05243	9	19	2	0.096653	0.795268	0.255349
Q8IBV7	Histone H2B OS=Plasmodium falciparum (isolate 3D7) OX=36329 GN=PF3D7_0714000 PE=3 SV=1	37C	1	1.02185	1.01944	1.00365	1.04492	1.01825	1.0484	1.04823	1.09684	1.05342	5	34	2	1.94969	0.672308	0.582509
Q8ILR8	Uncharacterized protein OS=Plasmodium falciparum (isolate 3D7) OX=36329 GN=PF3D7_1417700 PE=4 SV=1	37C	1	0.987009	0.978495	0.969931	0.974369	0.957768	1.00878	0.983962	1.00359	1.00807	7	10	2	1.7263	0.463724	6.40374
O77344	Glycogen synthase kinase 3 OS=Plasmodium falciparum (isolate 3D7) OX=36329 GN=PF3D7_0312400 PE=3 SV=2	37C	1	0.997768	0.990821	1.00937	0.981049	1.04501	0.993429	1.13452	1.19933	1.22174	12	18	2	10.8857	0.963117	3.9226
Q8ILP1	Mannose-1-phosphate guanyltransferase, putative OS=Plasmodium falciparum (isolate 3D7) OX=36329 GN=PF3D7_1420900 PE=4 SV=1	37C	1	1.00563	1.00934	0.988287	0.984106	1.02183	1.0091	1.03429	1.01025	1.05145	8	15	2	5.18754	0.544547	0.709488
Q8I2Y3	Merozoite organizing protein OS=Plasmodium falciparum (isolate 3D7) OX=36329 GN=PF3D7_0917000 PE=4 SV=1	37C	1	1.01575	0.987302	0.968419	0.978339	1.00916	0.96712	0.933063	0.936896	0.923583	12	14	2	3.3242	0.812931	-5.26821
Q8IBU0	RNA-binding protein, putative OS=Plasmodium falciparum (isolate 3D7) OX=36329 GN=PF3D7_0716000 PE=4 SV=1	37C	1	0.92811	1.2904	1.01425	0.929043	0.994127	1.01184	1.02059	0.900133	0.982517	9	13	2	0.0462144	0.189923	-6.22885
Q8I2U6	CRAL/TRIO domain-containing protein, putative OS=Plasmodium falciparum (isolate 3D7) OX=36329 GN=PF3D7_0920700 PE=4 SV=1	37C	1	0.960136	1.01731	0.958235	0.989476	1.00829	1.00383	1.05131	1.055	1.19829	10	19	2	49.6989	0.853941	0.982464
Q8I3Z5	Translationally-controlled tumor protein homolog OS=Plasmodium falciparum (isolate 3D7) OX=36329 GN=TCTP PE=1 SV=1	37C	1	0.905466	0.811725	0.883431	0.937553	0.936645	0.866275	0.920434	0.938659	0.948523	5	16	2	30.4041	0.091264	1.77716
Q8IL02	40S ribosomal protein S5 OS=Plasmodium falciparum (isolate 3D7) OX=36329 GN=PF3D7_1447000 PE=1 SV=1	37C	1	1.08833	1.06079	1.09978	1.06213	1.02315	1.08362	1.03013	1.00391	0.930464	12	20	2	56.2881	0.652467	-1.42436
Q8IL67	Stromal-processing peptidase, putative OS=Plasmodium falciparum (isolate 3D7) OX=36329 GN=PF3D7_1440200 PE=4 SV=2	37C	1	0.991892	0.981226	0.97653	0.994657	0.986002	0.979968	0.958733	0.969693	0.936667	15	15	2	10.0599	0.747376	-0.713145
Q8IKY7	SNARE protein, putative OS=Plasmodium falciparum (isolate 3D7) OX=36329 GN=PF3D7_1448600 PE=4 SV=1	37C	1	1.08512	1.07068	1.08417	1.06979	1.01248	1.04821	0.992584	0.956691	0.970639	7	9	2	7.12099	0.659777	-1.18339
Q8I5R8	DNA-directed RNA polymerases I, II, and III subunit RPABC3 OS=Plasmodium falciparum (isolate 3D7) OX=36329 GN=PF3D7_1213700 PE=3 SV=1	37C	1	0.994304	1.01768	1.01567	1.03967	1.01476	1.03173	1.01933	1.02552	1.00898	5	20	2	0.00786153	0.476198	0.730247
A0A5K1K925	40S ribosomal protein S11 OS=Plasmodium falciparum (isolate 3D7) OX=36329 GN=PF3D7_0516200 PE=3 SV=1	37C	1	1.08157	1.07226	1.12492	1.08715	1.06068	1.09974	1.12742	1.11678	1.13192	4	15	2	0.0047979	0.759074	0.106378
Q8IK93	Splicing factor 3A subunit 1, putative OS=Plasmodium falciparum (isolate 3D7) OX=36329 GN=PF3D7_1474500 PE=4 SV=1	37C	1	1.05412	1.00745	1.02574	1.03954	1.00892	1.03249	0.991945	0.963165	0.991182	12	14	2	8.82586	0.581589	-3.26955
A0A5K1K8H4	GTP-binding protein, putative OS=Plasmodium falciparum (isolate 3D7) OX=36329 GN=PF3D7_1352000 PE=4 SV=1	37C	1	1.04568	0.999192	1.0224	0.999726	1.0227	0.995727	1.02834	1.00201	1.05047	7	11	2	10.616	0.0887508	0.0483788
Q8IAX5	40S ribosomal protein S16, putative OS=Plasmodium falciparum (isolate 3D7) OX=36329 GN=PF3D7_0813900 PE=1 SV=1	37C	1	1.08701	1.07831	1.1048	1.09403	1.0515	1.10786	1.04607	1.10751	1.17328	6	16	2	0.0933234	0.50781	0.0862779
Q8I5E1	Uncharacterized protein OS=Plasmodium falciparum (isolate 3D7) OX=36329 GN=PF3D7_1227700 PE=4 SV=1	37C	1	0.996343	0.978029	0.972018	0.968864	0.985418	0.948043	0.962066	0.934973	0.963153	7	11	2	0.109483	0.679456	-0.357473
Q8I5G0	VAC14 domain-containing protein, putative OS=Plasmodium falciparum (isolate 3D7) OX=36329 GN=PF3D7_1225700 PE=3 SV=1	37C	1	1.03273	1.0074	1.01354	1.00887	1.01074	1.02774	1.08285	1.111	1.1745	11	13	2	26.0215	0.961566	0.912549
Q8IED3	Uncharacterized protein OS=Plasmodium falciparum (isolate 3D7) OX=36329 GN=PF3D7_1318300 PE=4 SV=1	37C	1	0.998863	0.996967	0.981175	1.02205	1.02182	1.00507	1.00683	1.03547	1.00988	13	15	2	0.114501	0.480041	2.01495
Q8I388	Vacuolar protein sorting-associated protein 46, putative OS=Plasmodium falciparum (isolate 3D7) OX=36329 GN=PF3D7_0906100 PE=4 SV=1	37C	1	0.966139	1.06728	1.04223	1.04388	1.07245	1.09813	1.13192	1.03552	1.2615	9	17	2	6.52572	0.571376	0.317634
Q8IKN5	Uncharacterized protein OS=Plasmodium falciparum (isolate 3D7) OX=36329 GN=PF3D7_1459600 PE=4 SV=1	37C	1	1.05905	1.03688	1.10779	1.07545	1.06183	1.0782	1.06616	1.05824	1.13421	8	13	2	0.060321	0.536567	0.0986153
Q8IJK5	Uncharacterized protein OS=Plasmodium falciparum (isolate 3D7) OX=36329 GN=PF3D7_1019700 PE=4 SV=2	37C	1	0.998634	0.980998	0.965675	1.0073	0.98592	0.990001	1.01295	1.05385	1.02089	18	21	2	12.8066	0.681919	5.03939
Q8IJT8	Dolichyl-phosphate-mannose--protein mannosyltransferase, putative OS=Plasmodium falciparum (isolate 3D7) OX=36329 GN=PF3D7_1010700 PE=4 SV=1	37C	1	0.968428	0.975266	1.00389	0.984714	0.977046	0.961437	0.949482	0.931016	0.873349	4	14	2	70.155	0.90181	-0.710914
Q8I3H0	Uncharacterized protein OS=Plasmodium falciparum (isolate 3D7) OX=36329 GN=PF3D7_0529800 PE=4 SV=1	37C	1	0.950967	0.949075	0.903615	0.948281	0.943184	0.949063	0.931913	0.943076	0.950127	14	17	2	1678.54	0.627739	0.000124553
A0A5K1K912	Uncharacterized protein OS=Plasmodium falciparum (isolate 3D7) OX=36329 GN=PF3D7_1360400 PE=4 SV=1	37C	1	1.02939	1.03954	1.06466	1.03148	1.05492	1.02916	1.07317	1.04431	1.04171	8	12	2	0.00111134	0.552828	0.727236
Q8IIA6	Kelch domain-containing protein, putative OS=Plasmodium falciparum (isolate 3D7) OX=36329 GN=PF3D7_1125800 PE=4 SV=2	37C	1	1.01994	0.99013	0.991814	1.00764	1.03654	1.00328	1.00957	0.990314	0.963979	8	8	2	7.96293	0.308236	-1.45571
Q8I5S6	Eukaryotic translation initiation factor 3 subunit A OS=Plasmodium falciparum (isolate 3D7) OX=36329 GN=PF3D7_1212700 PE=3 SV=1	37C	1	1.04457	1.07864	1.09373	1.06497	1.00414	1.03628	0.998504	1.04281	1.00537	15	16	2	0.374876	0.346523	-4.67141
Q8ILN5	Mitochondrial import inner membrane translocase subunit TIM8, putative OS=Plasmodium falciparum (isolate 3D7) OX=36329 GN=PF3D7_1421500 PE=4 SV=1	37C	1	0.993319	1.01308	0.987969	0.993612	1.00334	0.975882	0.947976	0.930929	0.916803	7	14	2	7.96347	0.949572	-1.15738
Q8I5V8	Mago-binding protein, putative OS=Plasmodium falciparum (isolate 3D7) OX=36329 GN=PF3D7_1209000 PE=3 SV=1	37C	1	0.964404	1.03472	0.916012	0.979068	0.968861	1.0299	1.05047	1.1215	1.17696	6	9	2	12.7021	0.829559	0.983588
Q8I323	26S proteasome regulatory subunit RPN8, putative OS=Plasmodium falciparum (isolate 3D7) OX=36329 GN=PF3D7_0912900 PE=3 SV=1	37C	1	1.03063	1.02263	1.07801	1.03041	1.01545	1.00827	0.996397	0.975348	0.981659	7	16	2	2.38392	0.555284	-1.12685
Q8II73	Spermidine synthase OS=Plasmodium falciparum (isolate 3D7) OX=36329 GN=PF3D7_1129000 PE=1 SV=1	37C	1	1.22393	1.10209	1.19537	1.18216	1.02184	1.09062	0.944904	0.911929	0.888538	6	13	2	5.60519	0.672367	-1.00148
Q8I701	Deoxyhypusine hydroxylase OS=Plasmodium falciparum (isolate 3D7) OX=36329 GN=PF3D7_1302600 PE=3 SV=1	37C	1	0.938897	0.9463	0.932056	1.06131	0.928317	0.957715	0.946348	0.944962	0.950127	5	9	2		0.0179393	8.63925e-05
Q8IBU8	Uncharacterized protein OS=Plasmodium falciparum (isolate 3D7) OX=36329 GN=PF3D7_0715200 PE=4 SV=1	37C	1	1.00096	0.982329	0.982771	0.985016	1.00431	1.00633	1.03447	1.00669	1.04558	12	14	2	3.18359	0.673699	1.08433
O77374	Uncharacterized protein PFC0810c OS=Plasmodium falciparum (isolate 3D7) OX=36329 GN=PFC0810c PE=1 SV=1	37C	1	1.01431	1.02981	1.02062	1.04475	0.977946	1.02912	1.02301	0.991354	1.03499	13	14	2	230.802	0.0776914	-5.8266e-05
Q8I469	Origin recognition complex subunit 1 OS=Plasmodium falciparum (isolate 3D7) OX=36329 GN=PF3D7_0503200 PE=3 SV=1	37C	1	0.983327	1.012	1.00075	1.02604	0.984562	1.00685	0.979667	0.96595	0.960684	15	17	2	11.5877	0.643947	-4.09174
Q8I486	Interspersed repeat antigen OS=Plasmodium falciparum (isolate 3D7) OX=36329 GN=PF3D7_0501400 PE=4 SV=2	37C	1	0.962332	0.978794	0.987122	1.0023	0.999663	1.0102	1.03957	1.03095	1.04074	9	10	2	1.63762	0.824663	0.71677
C6KSN9	AP2 domain transcription factor OS=Plasmodium falciparum (isolate 3D7) OX=36329 GN=PF3D7_0604100 PE=1 SV=1	37C	1	0.956075	0.985897	0.94424	0.960215	0.977046	1.00434	1.01736	1.0531	1.05047	13	20	2	6.57544	0.814742	1.07208
Q8IHY3	Ubiquitin-related modifier 1 homolog OS=Plasmodium falciparum (isolate 3D7) OX=36329 GN=PF3D7_1138100 PE=3 SV=1	37C	1	0.957966	0.975971	0.914779	0.953823	1.02937	0.982358	1.16176	1.19838	1.15757	5	24	2	6.6261	0.905433	3.84722
Q8I2P8	Protein kinase, putative OS=Plasmodium falciparum (isolate 3D7) OX=36329 GN=PF3D7_0926100 PE=4 SV=1	37C	1	0.978551	1.01712	0.986387	1.01738	1.05162	1.06401	1.09198	1.1232	1.08599	12	17	2	0.97842	0.910632	0.862588
Q8I3U0	AP2 domain transcription factor AP2-O2, putative OS=Plasmodium falciparum (isolate 3D7) OX=36329 GN=PF3D7_0516800 PE=4 SV=1	37C	1	1.07044	1.12618	1.00238	1.09296	1.08518	1.03042	1.05687	1.05175	1.09126	9	15	2	13.3492	0.272339	-3.39621e-06
Q8IAZ2	Uncharacterized protein OS=Plasmodium falciparum (isolate 3D7) OX=36329 GN=PF3D7_0815500 PE=4 SV=1	37C	1	1.00286	0.990473	1.02122	0.999649	0.996132	1.00633	1.04242	1.04924	1.04558	10	18	2	6.08921	0.87767	3.07526
C0H5C8	Protein kinase domain-containing protein OS=Plasmodium falciparum (isolate 3D7) OX=36329 GN=PF3D7_1321100 PE=4 SV=1	37C	1	0.995567	0.993725	0.957775	0.985898	0.972556	0.970787	0.97601	0.971074	1.03309	10	13	2	119.713	0.610428	7.7538
Q8IC15	Inositol-phosphate phosphatase, putative OS=Plasmodium falciparum (isolate 3D7) OX=36329 GN=PF3D7_0705500 PE=4 SV=1	37C	1	1.00691	0.994459	0.967449	1.02176	0.985961	0.989848	1.0127	1.01285	1.02555	15	17	2	4.69463	0.328034	3.25842
Q8I415	Single-stranded DNA-binding protein OS=Plasmodium falciparum (isolate 3D7) OX=36329 GN=PF3D7_0508800 PE=1 SV=1	37C	1	0.985297	0.92595	0.980517	0.929165	0.987783	1.05209	1.06723	1.12235	1.12288	9	13	2	3.864	0.869421	1.10321
Q8IM32	Transcription elongation factor SPT6, putative OS=Plasmodium falciparum (isolate 3D7) OX=36329 GN=PF3D7_1406200 PE=4 SV=1	37C	1	0.946836	0.997915	0.948027	1.00866	0.993921	0.990764	0.983368	1.05014	0.970639	7	10	2	0.103937	0.20366	8.16367
Q8IFP1	Pre-mRNA-splicing helicase BRR2, putative OS=Plasmodium falciparum (isolate 3D7) OX=36329 GN=PF3D7_0422500 PE=4 SV=1	37C	1	1.03302	1.02308	1.01156	1.04524	1.03197	1.0487	1.09144	1.09145	1.10848	13	14	2	3.26743	0.891013	0.669427
Q8I375	Translation initiation factor SUI1, putative OS=Plasmodium falciparum (isolate 3D7) OX=36329 GN=PF3D7_0907600 PE=4 SV=1	37C	1	1.02385	1.01352	1.02491	1.02655	0.996718	1.02739	1.06417	1.0365	1.07766	9	12	2	3.93455	0.698556	3.66555
Q8I2T0	p-aminobenzoic acid synthase OS=Plasmodium falciparum (isolate 3D7) OX=36329 GN=PF3D7_0922400 PE=4 SV=1	37C	1	1.00811	0.972816	0.979628	1.01577	1.0159	0.987852	0.986772	0.972388	0.931234	9	10	2	78.9459	0.686311	-1.3675
Q8ILV5	26S proteasome regulatory subunit RPN13, putative OS=Plasmodium falciparum (isolate 3D7) OX=36329 GN=PF3D7_1414000 PE=4 SV=2	37C	1	1.07535	1.02679	1.02504	1.00582	0.983344	1.01027	1.02105	1.03758	1.03499	5	14	2	0.0326061	0.109725	-1.32851
Q8IJF4	EF-hand calcium-binding domain-containing protein, putative OS=Plasmodium falciparum (isolate 3D7) OX=36329 GN=PF3D7_1025000 PE=4 SV=2	37C	1	1.09294	1.01381	0.997621	1.0301	1.01978	1.01533	1.03965	1.06575	1.1173	12	17	2	32.635	0.544156	1.5863
Q8IE40	Ribose-phosphate pyrophosphokinase, putative OS=Plasmodium falciparum (isolate 3D7) OX=36329 GN=PF3D7_1327800 PE=3 SV=1	37C	1	1.01304	1.0018	1.02957	1.01643	1.0076	0.997511	0.949054	0.934588	0.950127	10	14	2	5.2945	0.926476	-2.48487
C0H4F3	Bis(5'-nucleosyl)-tetraphosphatase [asymmetrical] OS=Plasmodium falciparum (isolate 3D7) OX=36329 GN=PF3D7_0520600 PE=1 SV=1	37C	1	0.958709	0.996699	0.967905	0.928378	0.9385	0.9945	0.962891	1.00562	0.963979	6	17	2	0.424966	0.138824	0.000168328
O96177	Exosome complex component MTR3, putative OS=Plasmodium falciparum (isolate 3D7) OX=36329 GN=PF3D7_0209200 PE=4 SV=3	37C	1	1.03165	1.01794	0.974048	1.01359	1.00639	0.983684	0.946558	0.993448	0.992933	7	10	2	1.81277	0.362391	-2.77002
Q8IBU4	GTP-binding translation elongation factor tu family protein, putative OS=Plasmodium falciparum (isolate 3D7) OX=36329 GN=PF3D7_0715600 PE=4 SV=1	37C	1	0.994251	0.971808	1.02677	1.01162	1.01624	1.02156	1.0523	1.03552	1.04851	10	15	2	0.638559	0.698576	0.544302
Q76NM5	Erythrocyte binding antigen-140 OS=Plasmodium falciparum (isolate 3D7) OX=36329 GN=PF3D7_1301600 PE=4 SV=1	37C	1	1.01532	1.04966	1.05805	1.03399	1.0364	1.03367	1.01886	1.00541	1.01904	12	15	2	9.26813	0.210677	-1.39041
Q8I5D0	WD repeat-containing protein, putative OS=Plasmodium falciparum (isolate 3D7) OX=36329 GN=PF3D7_1228800 PE=4 SV=1	37C	1	0.983779	0.950055	0.963931	0.962629	0.992146	0.977875	0.973124	1.00511	1.02182	15	22	2	34.9921	0.556481	3.0457
Q8I2X0	Eukaryotic translation initiation factor 3 subunit F, putative OS=Plasmodium falciparum (isolate 3D7) OX=36329 GN=PF3D7_0918300 PE=4 SV=1	37C	1	0.9958	1.08043	1.05313	1.0048	1.15462	0.996646	1.01942	0.942132	0.950127	8	12	2	2.55209	0.351823	-4.22938
Q8I5E7	DNA helicase 60 OS=Plasmodium falciparum (isolate 3D7) OX=36329 GN=PF3D7_1227100 PE=3 SV=1	37C	1	1.00857	1.04175	1.01078	1.03884	1.00302	0.997133	1.00591	0.955869	0.963979	10	11	2	7.97349	0.652541	-0.937365
Q8IE68	U6 snRNA-associated Sm-like protein LSm6, putative OS=Plasmodium falciparum (isolate 3D7) OX=36329 GN=PF3D7_1325000 PE=3 SV=1	37C	1	0.982511	0.965799	0.966601	0.959734	0.997662	0.984029	1.00261	1.00512	1.03119	5	24	2	16.2084	0.635998	0.821114
C0H4W2	U6 snRNA-associated Sm-like protein LSm3 OS=Plasmodium falciparum (isolate 3D7) OX=36329 GN=LSM3 PE=3 SV=1	37C	1	0.970063	1.01567	0.999685	0.982205	1.02483	1.03981	1.0896	1.11789	1.12176	5	22	2	4.74835	0.942227	0.9968
Q8IHV2	Uncharacterized protein OS=Plasmodium falciparum (isolate 3D7) OX=36329 GN=PF3D7_1141300 PE=4 SV=1	37C	1	0.95016	0.996873	0.947795	0.987794	0.988034	0.998527	1.01722	1.06233	1.05342	9	21	2	9.05173	0.768936	1.07203
Q8IIW6	Actin-like protein, putative OS=Plasmodium falciparum (isolate 3D7) OX=36329 GN=PF3D7_1103600 PE=3 SV=1	37C	1	1.04965	0.971642	0.975733	0.9936	0.970147	0.999979	0.988111	0.972878	0.992056	10	18	2	0.00640168	0.558799	-8.19929
O77381	40S ribosomal protein S11, putative OS=Plasmodium falciparum (isolate 3D7) OX=36329 GN=PF3D7_0317600 PE=1 SV=2	37C	1	1.09669	1.08736	1.11732	1.09461	1.00096	1.11904	1.02466	1.05396	1.01904	8	14	2	27.9798	0.13139	-0.823995
Q8I5G5	Uncharacterized protein OS=Plasmodium falciparum (isolate 3D7) OX=36329 GN=PF3D7_1225200 PE=4 SV=1	37C	1	1.00916	1.00271	1.05448	1.01264	0.997706	1.02166	1.008	0.982959	0.990308	10	12	2	1.69523	0.202167	-0.854995
Q8IBL9	Uncharacterized protein OS=Plasmodium falciparum (isolate 3D7) OX=36329 GN=PF3D7_0723400 PE=4 SV=1	37C	1	1.02894	1.0074	1.00937	1.02945	1.04506	1.0335	1.07037	1.06534	1.10196	11	19	2	5.58061	0.866684	0.42619
Q8IE48	PUB domain-containing protein, putative OS=Plasmodium falciparum (isolate 3D7) OX=36329 GN=PF3D7_1328900 PE=4 SV=1	37C	1	1.05711	1.01455	1.05418	1.03651	1.01099	1.03821	0.998498	0.997474	0.952542	13	22	2	11.6699	0.576489	-1.14274
Q8IM53	Cytochrome c, putative OS=Plasmodium falciparum (isolate 3D7) OX=36329 GN=PF3D7_1404100 PE=3 SV=1	37C	1	0.989143	0.983513	1.0151	0.974455	1.01002	0.996198	1.02648	1.02351	0.998224	7	23	2	0.788637	0.299227	1.96
Q8I450	Actin-like protein, putative OS=Plasmodium falciparum (isolate 3D7) OX=36329 GN=PF3D7_0505200 PE=3 SV=1	37C	1	0.996847	0.971247	0.972918	1.00767	0.980733	0.971713	0.924668	0.932943	0.848302	7	13	2	144.636	0.883915	-0.626955
O77315	DNA-directed RNA polymerases I, II, and III subunit RPABC2, putative OS=Plasmodium falciparum (isolate 3D7) OX=36329 GN=PF3D7_0303300 PE=3 SV=2	37C	1	1.01822	1.0028	1.00434	0.994812	0.9919	0.979381	0.963576	0.963951	0.949324	6	18	2	3.46119	0.936757	-0.588982
Q8IKF8	Rab GTPase activator, putative OS=Plasmodium falciparum (isolate 3D7) OX=36329 GN=PF3D7_1467900 PE=4 SV=1	37C	1	1.01545	0.992105	0.995188	0.997913	1.01751	1.00453	1.00612	0.995737	0.990308	13	17	2	0.454633	0.0247468	-0.301074
Q8IL07	Centrin-2 OS=Plasmodium falciparum (isolate 3D7) OX=36329 GN=PF3D7_1446600 PE=3 SV=1	37C	1	0.960799	0.968439	0.96862	0.951411	0.98912	0.989415	1.04086	1.03506	1.06844	6	8	2	6.6524	0.847211	1.17686
C6KSQ8	Uncharacterized protein OS=Plasmodium falciparum (isolate 3D7) OX=36329 GN=PF3D7_0606000 PE=4 SV=1	37C	1	1.01195	1.02571	1.00839	1.00822	1.03351	1.01545	1.05469	1.0643	1.10088	13	16	2	14.8071	0.883259	0.872768
O96193	Ras-related protein Rab-5A OS=Plasmodium falciparum (isolate 3D7) OX=36329 GN=PF3D7_0211200 PE=1 SV=1	37C	1	1.004	1.03213	1.03709	1.02718	0.979822	1.00602	0.894416	0.777316	0.798295	6	10	2	12.1024	0.967429	-3.34748
Q8IKE5	Shewanella-like protein phosphatase 1, putative OS=Plasmodium falciparum (isolate 3D7) OX=36329 GN=PF3D7_1469200 PE=4 SV=1	37C	1	0.977484	1.00956	1.04227	1.00888	1.05177	1.01851	1.05587	1.06814	1.08809	9	18	2	1.47181	0.726381	0.349067
O77384	Protein PFC0760c OS=Plasmodium falciparum (isolate 3D7) OX=36329 GN=PFC0760c PE=1 SV=1	37C	1	0.976582	1.01456	0.962283	0.947362	0.977046	1.01311	1.05535	1.12243	1.13765	10	16	2	12.8106	0.915816	1.28096
Q8IKT8	RNA-binding protein, putative OS=Plasmodium falciparum (isolate 3D7) OX=36329 GN=PF3D7_1454000 PE=4 SV=1	37C	1	0.982267	0.963185	0.971702	0.99293	1.02194	0.961689	0.993201	1.01314	1.01261	9	11	2	15.362	0.300464	4.24124
Q8ILA8	Uncharacterized protein OS=Plasmodium falciparum (isolate 3D7) OX=36329 GN=PF3D7_1435600 PE=4 SV=1	37C	1	0.988472	1.0387	0.966544	1.00103	0.982366	0.991889	1.02753	1.0296	1.01996	9	14	2	2.3231	0.27183	1.60125
Q8I657	E2F-associated phosphoprotein, putative OS=Plasmodium falciparum (isolate 3D7) OX=36329 GN=PF3D7_0217700 PE=4 SV=1	37C	1	1.02996	1.00938	1.00853	1.01892	1.06247	1.07977	1.08401	1.1036	1.10413	6	13	2	0.761423	0.945861	1.16705
Q8IEJ5	Uncharacterized protein OS=Plasmodium falciparum (isolate 3D7) OX=36329 GN=PF3D7_1312700 PE=4 SV=1	37C	1	1.05053	1.04742	1.06181	1.08344	0.999651	1.04451	1.00413	0.973214	0.963153	9	18	2	8.05486	0.584806	-1.17352
Q8ILD0	Chromatin assembly factor 1 P55 subunit, putative OS=Plasmodium falciparum (isolate 3D7) OX=36329 GN=PF3D7_1433300 PE=4 SV=2	37C	1	0.982101	0.997422	0.996974	0.962462	1.00011	0.982907	1.00155	0.944453	0.947723	8	15	2	27.5333	0.705209	-9.46971
Q8I3J7	Uncharacterized protein OS=Plasmodium falciparum (isolate 3D7) OX=36329 GN=PF3D7_0526800 PE=4 SV=1	37C	1	1.03216	1.04937	1.04848	1.07402	1.05477	1.02259	1.0225	0.983955	0.961506	8	13	2	18.8448	0.679134	-1.31863
Q8ILD4	HP12 protein homolog, putative OS=Plasmodium falciparum (isolate 3D7) OX=36329 GN=PF3D7_1432800 PE=4 SV=1	37C	1	1.02189	0.973879	1.00915	1.00765	0.99855	0.992125	1.02434	1.0089	1.0756	9	13	2	21.4092	0.527965	1.11691
Q7K6B0	Ras-related protein Rab-18 OS=Plasmodium falciparum (isolate 3D7) OX=36329 GN=PF3D7_0807300 PE=4 SV=1	37C	1	1.01823	1.05862	1.07223	1.01114	1.01462	1.00892	0.957477	0.912303	0.939799	6	17	2	6.5438	0.793705	-1.58909
Q8IFN9	Eukaryotic initiation factor 4A-III, putative OS=Plasmodium falciparum (isolate 3D7) OX=36329 GN=PF3D7_0422700 PE=3 SV=1	37C	1	1.00906	0.998978	1.0254	1.02077	0.987468	1.04075	1.04352	1.05913	0.999111	9	11	2	1.83252	0.372455	3.35487
A0A5K1K988	Inner membrane complex protein 1f, putative OS=Plasmodium falciparum (isolate 3D7) OX=36329 GN=PF3D7_1351700 PE=4 SV=1	37C	1	0.960724	0.98146	0.951313	0.983187	0.967733	0.964931	0.990475	1.00351	0.974003	8	9	2	7.41748	0.218671	7.95464
Q8I2X3	Acid phosphatase OS=Plasmodium falciparum (isolate 3D7) OX=36329 GN=PF3D7_0918000 PE=1 SV=1	37C	1	1.11703	1.06023	1.11012	1.1074	1.02486	1.05716	1.0302	1.04121	1	10	16	2	1.28996	0.277931	-1.20583
C6KT22	Uncharacterized protein OS=Plasmodium falciparum (isolate 3D7) OX=36329 GN=PF3D7_0618200 PE=4 SV=1	37C	1	1.00891	1.03082	1.07568	0.987054	1.04814	1.04862	1.08927	1.09262	1.10521	7	16	2	1.72536	0.642039	0.35083
Q8IHT5	AP2 domain transcription factor AP2-O, putative OS=Plasmodium falciparum (isolate 3D7) OX=36329 GN=PF3D7_1143100 PE=4 SV=1	37C	1	1.01384	1.01861	1.0196	1.02097	1.09052	1.01997	0.963337	0.981322	0.959863	10	12	2	3.75296	0.560599	-4.35458
Q8IKA7	GTPase-activating protein, putative OS=Plasmodium falciparum (isolate 3D7) OX=36329 GN=PF3D7_1473100 PE=4 SV=1	37C	1	0.974497	0.966997	0.962103	0.978319	0.961729	0.938177	0.977418	0.945364	0.927393	10	16	2	1.43256	0.637958	-0.153193
A0A144A0A4	Glutaminase OS=Plasmodium falciparum (isolate 3D7) OX=36329 GN=PF3D7_1116200.1 PE=3 SV=1	37C	1	1.03455	1.01174	1.04027	1.04986	1.06103	1.06257	1.06825	1.07197	1.07354	5	13	2	0.0532412	0.911996	0.371284
Q8IHU0	60S ribosomal protein L28 OS=Plasmodium falciparum (isolate 3D7) OX=36329 GN=PF3D7_1142500 PE=1 SV=1	37C	1	1.03014	1.09212	1.1007	1.07364	1.0855	1.07771	1.12273	1.09781	1.124	5	14	2	0.0105408	0.765	0.190961
Q8IDL4	TBC domain protein, putative OS=Plasmodium falciparum (isolate 3D7) OX=36329 GN=PF3D7_1348500 PE=4 SV=1	37C	1	1.04364	1.00336	1.0223	0.991973	1.01808	1.06097	1.04244	1.05185	1.00447	9	13	2	0.656399	0.151668	0.103581
C6KT32	Uncharacterized protein OS=Plasmodium falciparum (isolate 3D7) OX=36329 GN=PF3D7_0619200 PE=4 SV=1	37C	1	1.0126	0.963093	0.956699	0.966682	0.981732	0.9392	0.967422	0.956024	0.898481	8	8	2	21.9085	0.583685	-0.230374
Q8I5K3	Histone-lysine N-methyltransferase, H3 lysine-4 specific OS=Plasmodium falciparum (isolate 3D7) OX=36329 GN=PF3D7_1221000 PE=4 SV=1	37C	1	0.964589	0.97553	0.975221	1.00951	0.979167	0.981994	0.912787	0.869439	0.813314	12	13	2	25.5854	0.945302	-1.073
Q8IJV7	Nucleolar protein 5, putative OS=Plasmodium falciparum (isolate 3D7) OX=36329 GN=PF3D7_1008800 PE=3 SV=1	37C	1	1.11793	1.09216	1.08571	1.12103	1.04506	1.09471	1.07247	1.09378	1.10196	11	14	2	41267.1	0.64007	-9.3693e-05
Q8ILN8	40S ribosomal protein S25 OS=Plasmodium falciparum (isolate 3D7) OX=36329 GN=PF3D7_1421200 PE=1 SV=2	37C	1	1.0298	1.11429	1.10277	1.07084	1.06205	1.10701	1.14748	1.14322	1.2073	5	15	2	0.680227	0.742569	0.206676
O97290	ATP-dependent RNA helicase DDX42, putative OS=Plasmodium falciparum (isolate 3D7) OX=36329 GN=PF3D7_0321600 PE=4 SV=2	37C	1	0.977719	0.997487	0.978476	1.01192	0.994493	0.976945	0.961551	0.954467	0.912338	10	11	2	33.3776	0.835088	-0.833354
C6KTA7	Ankyrin-repeat protein, putative OS=Plasmodium falciparum (isolate 3D7) OX=36329 GN=PF3D7_0627100 PE=4 SV=1	37C	1	0.986724	0.955944	0.969597	0.967177	0.982661	0.993075	1.04781	1.05475	1.07663	12	14	2	6.78034	0.907155	1.72454
C6KT44	Merozoite surface protein 10 OS=Plasmodium falciparum (isolate 3D7) OX=36329 GN=PF3D7_0620400 PE=4 SV=1	37C	1	1.00267	0.998723	0.988727	1.0121	1.02407	0.978769	1.02063	1.01523	1.00178	6	10	2	0.000325969	0.0312394	0.0904425
Q8IKY3	CLASP domain-containing protein, putative OS=Plasmodium falciparum (isolate 3D7) OX=36329 GN=PF3D7_1449100 PE=4 SV=1	37C	1	0.986263	0.99623	0.972192	0.9971	1.00839	0.997396	1.00582	1.03567	1.06038	12	14	2	34.8804	0.860571	1.30045
A0A5K1K826	Uncharacterized protein OS=Plasmodium falciparum (isolate 3D7) OX=36329 GN=PF3D7_1319400 PE=4 SV=1	37C	1	0.990269	0.981889	1.00238	1.00374	1.0028	0.973223	0.995439	1.03553	1.02182	13	21	2	21.3481	0.660818	3.69033
Q8I2G0	Ring-exported protein 2 OS=Plasmodium falciparum (isolate 3D7) OX=36329 GN=PF3D7_0936000 PE=4 SV=2	37C	1	1.17984	1.11023	1.18307	1.2166	1.05692	1.13808	1.1246	1.21311	1.25868	4	20	2	0.0191564	0.489648	0.0655335
Q8I3I0	Peptidyl-prolyl cis-trans isomerase OS=Plasmodium falciparum (isolate 3D7) OX=36329 GN=PF3D7_0528700 PE=3 SV=1	37C	1	0.98656	0.927174	0.95257	0.973355	1.03123	0.978805	1.01484	1.03959	1.02182	4	6	2	0.270569	0.527751	5.29823
Q8I1N6	AP2/ERF domain-containing protein PFD0985w OS=Plasmodium falciparum (isolate 3D7) OX=36329 GN=PFD0985w PE=1 SV=2	37C	1	0.933518	0.985709	0.929755	0.938906	0.901716	0.9219	0.879043	0.879752	0.858015	10	21	2	3.17977	0.847225	-0.207766
Q8IAQ8	V-type proton ATPase subunit a, putative OS=Plasmodium falciparum (isolate 3D7) OX=36329 GN=PF3D7_0806800 PE=3 SV=1	37C	1	1.14658	1.12775	1.1835	1.19072	1.0265	1.1046	1.03258	1.0123	1.07354	10	11	2	0.42363	0.344764	-5.61279
Q8I1Y6	RanBD1 domain-containing protein OS=Plasmodium falciparum (isolate 3D7) OX=36329 GN=PF3D7_0404300 PE=4 SV=2	37C	1	0.958498	0.999188	0.980337	0.960341	0.976205	0.98295	0.961613	0.980282	0.967298	8	10	2	11300.9	0.309121	0.030371
Q8IEM1	U4/U6 small nuclear ribonucleoprotein PRP3, putative OS=Plasmodium falciparum (isolate 3D7) OX=36329 GN=PF3D7_1309300 PE=4 SV=1	37C	1	0.945515	0.985211	0.979093	0.97005	1.00014	1.01715	1.08588	1.09617	1.15519	7	14	2	9.49362	0.933807	0.828295
Q8I3H2	Cell cycle regulator protein, putative OS=Plasmodium falciparum (isolate 3D7) OX=36329 GN=PF3D7_0529500 PE=4 SV=1	37C	1	0.977634	1.00747	1.00292	0.983187	0.986737	0.988397	1.01623	0.997956	1.01353	5	10	2	6.45073	0.388356	8.07236
Q8I573	CHCH domain-containing protein OS=Plasmodium falciparum (isolate 3D7) OX=36329 GN=PF3D7_1234900 PE=4 SV=1	37C	1	0.974627	1.00201	1.03225	1.0587	1.06018	1.00728	0.950707	0.860267	0.846386	4	5	2	15.0841	0.877797	-2.04126
Q8IEG9	Lipoate--protein ligase OS=Plasmodium falciparum (isolate 3D7) OX=36329 GN=PF3D7_1314600 PE=1 SV=1	37C	1	0.98358	0.997277	0.979762	1.00206	1.01188	0.985109	1.03212	1.05957	1.02742	9	16	2	9.40493	0.765661	4.01623
Q8I1X7	Ag-1 blood stage membrane protein homologue OS=Plasmodium falciparum (isolate 3D7) OX=36329 GN=PF3D7_0405200 PE=4 SV=1	37C	1	0.995333	0.990518	0.990101	0.977461	0.978672	1.00558	0.979334	0.961582	0.935108	5	11	2	49.9098	0.818117	-1.51776
Q8III3	Nucleolar protein 56, putative OS=Plasmodium falciparum (isolate 3D7) OX=36329 GN=PF3D7_1118500 PE=3 SV=1	37C	1	1.05025	1.04648	1.04114	1.05194	1.02573	1.05657	1.01313	1.01619	0.982517	9	11	2	26.4059	0.494087	-1.25283
Q8IFM0	PRESAN domain-containing protein OS=Plasmodium falciparum (isolate 3D7) OX=36329 GN=PF3D7_0424600 PE=4 SV=1	37C	1	1.05211	1.02181	1.05608	1.03591	0.976275	1.03154	0.971285	0.958164	0.886435	7	13	2	28.6939	0.768743	-0.83774
Q8I356	Uncharacterized protein OS=Plasmodium falciparum (isolate 3D7) OX=36329 GN=PF3D7_0909600 PE=4 SV=1	37C	1	1.02809	1.03605	1.05173	1.03989	0.977913	1.00984	0.96875	0.942419	0.997338	7	12	2	0.432814	0.60904	-4.3062
Q8IDM6	Nucleoside transporter 1 OS=Plasmodium falciparum (isolate 3D7) OX=36329 GN=PF3D7_1347200 PE=3 SV=1	37C	1	1.24707	1.15807	1.2484	1.26044	1.07973	1.15659	1.08834	1.15397	1.16961	6	16	2	0.865024	0.0362024	-0.974214
A0A5K1K8U2	Uncharacterized protein OS=Plasmodium falciparum (isolate 3D7) OX=36329 GN=PF3D7_1332200 PE=4 SV=1	37C	1	0.645816	0.662748	0.652843	0.663485	0.660538	0.659957	0.662692	0.697543	0.688304	10	15	2	33306.1	0.97788	0.000192533
Q8IIC8	Golgi protein 2 OS=Plasmodium falciparum (isolate 3D7) OX=36329 GN=PF3D7_1123500 PE=4 SV=1	37C	1	1.04482	1.08001	1.1112	1.0714	1.05194	1.03773	1.02633	0.919349	0.979094	10	13	2	15.3976	0.659296	-4.2784
Q8IBB6	eIF-2B GDP-GTP exchange factor subunit alpha OS=Plasmodium falciparum (isolate 3D7) OX=36329 GN=PF3D7_0828500 PE=3 SV=1	37C	1	1.01405	1.02123	1.02075	1.01399	1.00524	1.00912	1.01708	0.978615	0.926628	9	12	2	57.3721	0.947396	-3.31003
Q8IJC0	Ribosome production factor 2 homolog OS=Plasmodium falciparum (isolate 3D7) OX=36329 GN=PF3D7_1028400 PE=3 SV=1	37C	1	1.01067	0.992833	0.995392	1.00017	1.05343	0.975084	1.03425	1.04669	1.02182	9	11	2	0.689191	0.235556	0.454672
Q8IAN1	U3 small nucleolar RNA-associated protein 14, putative OS=Plasmodium falciparum (isolate 3D7) OX=36329 GN=PF3D7_0803100 PE=4 SV=1	37C	1	0.971589	0.951399	0.984525	0.976151	0.977046	0.97037	0.98514	1.01088	1.00537	8	17	2	16.648	0.549607	3.84221
Q8I2X8	Uncharacterized protein OS=Plasmodium falciparum (isolate 3D7) OX=36329 GN=PF3D7_0917500 PE=4 SV=1	37C	1	0.947614	1.01195	0.936964	0.917736	0.91766	0.948668	0.891164	0.852486	0.813314	10	12	2	30.6999	0.81208	-0.300954
Q8I2U4	U4/U6 snRNA-associated-splicing factor, putative OS=Plasmodium falciparum (isolate 3D7) OX=36329 GN=PF3D7_0920900 PE=4 SV=1	37C	1	1.01417	1.03443	1.01844	0.9971	1.03788	1.03891	1.07932	1.05882	1.06038	11	18	2	1.71905	0.757808	1.427
Q8IEM5	mRNA-decapping enzyme 2, putative OS=Plasmodium falciparum (isolate 3D7) OX=36329 GN=PF3D7_1308900 PE=3 SV=1	37C	1	1.02699	0.940137	0.983743	1.01378	0.999846	0.996044	0.989752	0.96909	0.971478	7	15	2	21.811	0.161981	-2.18199
Q8I206	PRESAN domain-containing protein OS=Plasmodium falciparum (isolate 3D7) OX=36329 GN=PF3D7_0402000 PE=4 SV=1	37C	1	1.07111	1.02804	1.0744	1.05208	1.03114	1.01461	0.996147	1.01432	0.972318	7	17	2	2.44563	0.507707	-1.34537
Q8I4S8	Translation initiation factor eIF-2B subunit beta, putative OS=Plasmodium falciparum (isolate 3D7) OX=36329 GN=PF3D7_1250600 PE=3 SV=1	37C	1	1.04693	1.13051	1.06035	1.11422	1.09063	1.02927	1.03697	1.06293	1.06238	6	9	2	1.60349	0.0738801	-1.6718
Q8I5S3	Mediator of RNA polymerase II transcription subunit 18, putative OS=Plasmodium falciparum (isolate 3D7) OX=36329 GN=PF3D7_1213200 PE=4 SV=1	37C	1	1.01126	0.986736	0.985842	0.986904	1.01029	0.983804	1.00167	1.02603	1.06238	10	19	2	59.1096	0.834366	1.84954
Q8I5Y7	High mobility group protein B3, putative OS=Plasmodium falciparum (isolate 3D7) OX=36329 GN=PF3D7_1205800 PE=4 SV=1	37C	1	1.01706	0.98611	1.00657	1.00541	1.03041	1.01286	1.04412	1.01376	1.05838	14	16	2	2.87101	0.547368	0.458159
Q8IBY8	Uncharacterized protein OS=Plasmodium falciparum (isolate 3D7) OX=36329 GN=PF3D7_0710200 PE=4 SV=1	37C	1	0.993225	0.999103	0.999078	1.01354	0.998981	0.996658	1.00334	0.997726	1.05145	13	13	2	202.164	0.901093	4.93437
Q9U0I4	Exosome complex component RRP4 OS=Plasmodium falciparum (isolate 3D7) OX=36329 GN=PF3D7_0410400 PE=4 SV=1	37C	1	1.0243	0.990397	0.990914	1.00589	1.018	0.985819	0.996025	0.988727	0.961506	6	9	2	15.2387	0.475836	-0.867557
Q8IM68	tRNA pseudouridine(55) synthase OS=Plasmodium falciparum (isolate 3D7) OX=36329 GN=PF3D7_1402100 PE=3 SV=1	37C	1	1.00055	0.97572	0.97593	0.979448	1.02534	1.0079	1.06723	1.07112	1.06844	15	20	2	3.95019	0.863888	1.10271
Q8IET2	Uncharacterized protein OS=Plasmodium falciparum (isolate 3D7) OX=36329 GN=PF3D7_1303300 PE=4 SV=1	37C	1	1.01278	0.974802	0.955311	0.970149	0.958755	0.9109	0.90074	0.880691	0.876755	7	9	2	1.97882	0.932054	-0.413985
Q8IJC9	DNA-directed RNA polymerase II subunit RPB7, putative OS=Plasmodium falciparum (isolate 3D7) OX=36329 GN=PF3D7_1027400 PE=3 SV=1	37C	1	0.998153	0.997341	1.03736	0.994076	0.96777	1.00241	0.981957	0.910003	0.889241	5	9	2	25.7674	0.863689	-2.24123
Q8I307	Uncharacterized protein OS=Plasmodium falciparum (isolate 3D7) OX=36329 GN=PF3D7_0914500 PE=4 SV=1	37C	1	0.995752	0.992227	0.978028	1.00728	1.00485	0.964404	0.92803	0.915457	0.888538	10	13	2	7.28829	0.940626	-1.24168
Q8IJ93	MORN repeat-containing protein 1 OS=Plasmodium falciparum (isolate 3D7) OX=36329 GN=PF3D7_1031200 PE=4 SV=2	37C	1	0.996972	0.963791	0.973336	0.970886	0.989269	0.956885	0.975554	0.968641	0.937448	7	10	2	3.98314	0.525841	-0.171516
A0A5K1K999	Kinetochore protein SPC25 OS=Plasmodium falciparum (isolate 3D7) OX=36329 GN=PF3D7_1345900 PE=3 SV=1	37C	1	0.987981	0.976743	0.940655	0.931255	0.959552	0.958411	1.00418	0.960845	1.00627	9	15	2	5.68773	0.213334	7.97091
C0H537	tRNA (guanine(37)-N1)-methyltransferase OS=Plasmodium falciparum (isolate 3D7) OX=36329 GN=PFI0700c PE=3 SV=1	37C	1	1.01287	0.975523	1.02643	1.00892	0.996602	1.01401	0.949749	0.883766	0.865281	7	12	2	15.6712	0.940349	-2.13491
Q8IEP8	Uncharacterized protein OS=Plasmodium falciparum (isolate 3D7) OX=36329 GN=PF3D7_1306700 PE=4 SV=1	37C	1	0.958451	0.956076	0.95119	0.937085	0.99668	0.932382	1.05804	0.980071	1.0756	7	8	2	6.68267	0.560704	7.51904
O97314	Translation machinery-associated protein 7, putative OS=Plasmodium falciparum (isolate 3D7) OX=36329 GN=PF3D7_0323000 PE=4 SV=1	37C	1	1.10106	1.00833	1.09651	0.983187	1.11635	1.01056	1.13348	1.02909	1.0902	4	11	2	0.356473	0.137093	0.0469245
Q8IBL7	Proteasome assembly chaperone 4, putative OS=Plasmodium falciparum (isolate 3D7) OX=36329 GN=PF3D7_0723600 PE=4 SV=1	37C	1	0.975521	1.01549	1.00479	0.96013	0.986865	0.994322	0.984109	0.969894	0.941374	5	13	2	28.7571	0.492434	-1.56382
Q8IIU3	RuvB-like helicase OS=Plasmodium falciparum (isolate 3D7) OX=36329 GN=PF3D7_1106000 PE=3 SV=1	37C	1	1.0391	1.02235	1.04012	1.02685	1.0171	1.01735	0.970628	1.02134	0.959863	9	11	2	4.40162	0.497854	-3.91002
Q8IIA5	XTBD domain-containing protein, putative OS=Plasmodium falciparum (isolate 3D7) OX=36329 GN=PF3D7_1125900 PE=4 SV=1	37C	1	0.937856	1.00155	0.919335	0.945307	0.927692	0.972643	0.981344	0.984798	0.962329	4	13	2	3.37763	0.18886	5.64487e-05
Q8IHW4	V-type proton ATPase subunit F OS=Plasmodium falciparum (isolate 3D7) OX=36329 GN=PF3D7_1140100 PE=3 SV=2	37C	1	0.979978	1.03681	1.02808	0.982311	1.02316	1.00797	1.02352	0.963659	1.00089	8	18	2	3.48165	0.0659058	-0.823642
Q8ILZ6	Phosphatidate cytidylyltransferase OS=Plasmodium falciparum (isolate 3D7) OX=36329 GN=PF3D7_1409900 PE=3 SV=1	37C	1	0.937923	0.935735	0.899314	0.969096	0.945152	0.94035	0.932131	0.954883	0.894904	7	10	2	0.00557421	0.469658	-0.029661
Q8IKP7	Aminodeoxychorismate lyase OS=Plasmodium falciparum (isolate 3D7) OX=36329 GN=PF3D7_1458400 PE=4 SV=1	37C	1	0.993076	1.00591	0.997601	1.01513	1.00621	0.991117	0.998834	1.00106	0.986831	9	15	2	1.58477	0.284386	-6.37552
Q8IIA2	40S ribosomal protein S18, putative OS=Plasmodium falciparum (isolate 3D7) OX=36329 GN=PF3D7_1126200 PE=1 SV=1	37C	1	0.917853	0.972715	1.0028	0.972353	0.924111	0.939822	0.950613	0.943546	1.03214	5	10	2	90.8496	0.394486	11.7443
A0A5K1K8E0	Uncharacterized protein OS=Plasmodium falciparum (isolate 3D7) OX=36329 GN=PF3D7_1327300 PE=4 SV=1	37C	1	0.948718	0.928738	0.932909	0.982306	0.966549	0.951081	0.986977	0.9978	1.00627	11	11	2	10.5915	0.441836	3.34987
C6KSW5	Eukaryotic translation initiation factor 3 subunit L OS=Plasmodium falciparum (isolate 3D7) OX=36329 GN=PF3D7_0612100 PE=3 SV=1	37C	1	0.992147	1.02834	1.03752	1.01241	1.0077	0.977828	0.964125	0.902845	0.928159	9	13	2	7.51506	0.859461	-1.14726
Q8IEJ0	CX3CL1-binding protein 2 OS=Plasmodium falciparum (isolate 3D7) OX=36329 GN=PF3D7_1301700 PE=4 SV=1	37C	1	1.32085	1.18266	1.29468	1.25799	1.09842	1.14637	1.0595	1.09256	1.16356	4	11	2	0.431877	0.247555	-5.46935
C0H4A0	U4/U6 small nuclear ribonucleoprotein PRP31, putative OS=Plasmodium falciparum (isolate 3D7) OX=36329 GN=PF3D7_0409100 PE=3 SV=1	37C	1	1.02818	1.01475	1.02343	1.02051	0.986516	0.996184	0.962925	0.936324	0.907916	9	10	2	27.5898	0.934886	-0.632629
Q8I237	Transcription initiation factor TFIIB, putative OS=Plasmodium falciparum (isolate 3D7) OX=36329 GN=PF3D7_0110800 PE=4 SV=1	37C	1	0.968351	0.966363	0.970078	0.96036	0.951121	0.985277	0.975201	0.935266	0.932007	6	11	2	0.766317	0.526528	-0.121356
Q8IBL6	Metallo-hydrolase/oxidoreductase, putative OS=Plasmodium falciparum (isolate 3D7) OX=36329 GN=PF3D7_0723700 PE=4 SV=1	37C	1	0.994489	0.987099	0.985298	1.01317	0.9933	0.994143	1.02877	1.06101	1.03882	9	9	2	11.0102	0.867469	3.55087
O77389	Formate-nitrite transporter OS=Plasmodium falciparum (isolate 3D7) OX=36329 GN=PF3D7_0316600 PE=1 SV=2	37C	1	1.22827	1.13562	1.21164	1.18401	1.02055	1.10273	1.01248	1.05086	1.08809	7	23	2	0.387929	0.361266	-4.68852
C0H4B1	Memo-like protein OS=Plasmodium falciparum (isolate 3D7) OX=36329 GN=PF3D7_0417500.1 PE=3 SV=1	37C	1	0.889735	0.944755	0.914109	0.89227	0.908285	0.877735	0.907412	0.922107	0.919804	6	12	2		0.000410511	-1.11471e-05
Q8IAQ5	DnaJ protein, putative OS=Plasmodium falciparum (isolate 3D7) OX=36329 GN=PF3D7_0806500 PE=4 SV=1	37C	1	1.05337	1.02839	1.03709	1.02237	1.04628	1.09961	1.04833	1.02672	0.995571	10	12	2	0.163274	0.180426	-8.02415e-05
Q8IIT2	Nucleic acid binding protein, putative OS=Plasmodium falciparum (isolate 3D7) OX=36329 GN=PF3D7_1107100 PE=4 SV=2	37C	1	0.964176	0.9814	0.968091	0.986655	0.98997	0.975632	0.959947	0.980874	0.991182	7	9	2	5.09642e+25	0.30562	1.24692e-05
A0A144A366	Glycylpeptide N-tetradecanoyltransferase OS=Plasmodium falciparum (isolate 3D7) OX=36329 GN=PF3D7_1412800 PE=3 SV=1	37C	1	1.02423	1.14143	1.0633	1.03999	1.07249	1.06647	1.10983	1.1555	1.18067	10	11	2	0.402125	0.562826	0.195392
Q8I278	Pre-rRNA-processing protein TSR2, putative OS=Plasmodium falciparum (isolate 3D7) OX=36329 GN=PF3D7_0106400 PE=3 SV=1	37C	1	0.959003	0.986427	0.972078	1.00375	0.949318	0.937094	0.886307	0.909024	0.839432	3	9	2	26.0859	0.855361	-0.47321
A0A143ZY73	Transcription initiation factor IIA subunit 1, putative OS=Plasmodium falciparum (isolate 3D7) OX=36329 GN=PF3D7_0716400 PE=4 SV=1	37C	1	1.00001	0.988373	0.99802	0.968343	0.996136	0.982563	0.984775	0.986852	0.998224	5	11	2	96.566	0.120877	-0.0436719
Q8I3N6	Iron-sulfur assembly protein OS=Plasmodium falciparum (isolate 3D7) OX=36329 GN=PF3D7_0522700 PE=4 SV=1	37C	1	0.976715	1.00779	1.01772	0.999212	0.992175	0.990101	0.993303	0.941081	0.916055	7	11	2	36.9607	0.883371	-2.53915
Q8I4V7	Serine/threonine protein kinase, putative OS=Plasmodium falciparum (isolate 3D7) OX=36329 GN=PF3D7_1247500 PE=4 SV=1	37C	1	0.984827	1.00012	1.0078	0.994469	1.00027	1.01592	0.969259	0.923619	0.921311	11	11	2	14.0592	0.942747	-3.62393
Q8I470	4-diphosphocytidyl-2-C-methyl-D-erythritol kinase, putative OS=Plasmodium falciparum (isolate 3D7) OX=36329 GN=PF3D7_0503100 PE=3 SV=1	37C	1	1.01012	0.988991	0.988223	0.983187	0.969353	0.98944	0.995339	0.986816	0.983377	11	15	2	0.00888477	0.581031	-4.04877
Q8IJ79	RNA polymerase II-associated protein 1, putative OS=Plasmodium falciparum (isolate 3D7) OX=36329 GN=PF3D7_1032900 PE=4 SV=2	37C	1	0.980435	0.986415	0.944385	0.993572	0.995107	1.00274	1.00523	1.02629	0.989437	9	10	2	0.617885	0.364421	1.49621
Q8I5A4	Pre-mRNA-splicing factor ATP-dependent RNA helicase PRP2, putative OS=Plasmodium falciparum (isolate 3D7) OX=36329 GN=PF3D7_1231600 PE=4 SV=1	37C	1	1.02081	0.976127	0.98665	0.992383	1.00529	0.97734	0.981929	0.966714	0.955782	7	9	2	5.0321	0.552814	-0.695479
Q8IIT3	U6 snRNA-associated Sm-like protein LSm4 OS=Plasmodium falciparum (isolate 3D7) OX=36329 GN=LSM4 PE=3 SV=2	37C	1	1.01682	1.00311	1.0032	1.04633	0.980034	0.959303	0.942398	0.904127	0.859327	5	9	2	27.0176	0.913191	-0.617356
Q8I3M7	Divalent metal transporter, putative OS=Plasmodium falciparum (isolate 3D7) OX=36329 GN=PF3D7_0523800 PE=4 SV=1	37C	1	1.01278	1.00297	1.02055	0.981653	0.995337	0.958801	0.942363	0.882432	0.876755	7	10	2	12.1326	0.954648	-0.73842
Q8IKC5	Diacylglycerol kinase OS=Plasmodium falciparum (isolate 3D7) OX=36329 GN=PF3D7_1471400 PE=3 SV=2	37C	1	0.951705	1.01917	0.945231	0.952029	0.965005	0.961301	0.991138	1.00174	0.989437	12	18	2	83.0102	0.0932614	4.20918e-05
C6KTD4	Sec14-like cytosolic factor or phosphatidylinositol/phosphatidylcholine transfer protein, putative OS=Plasmodium falciparum (isolate 3D7) OX=36329 GN=PF3D7_0629900 PE=4 SV=1	37C	1	1.05169	1.01791	1.04202	1.02029	1.03696	1.0225	1.03602	0.97778	1.06038	7	12	2	1.19877e+10	0.144334	-1.38619e-05
Q8IIC4	Ribonucloprotein OS=Plasmodium falciparum (isolate 3D7) OX=36329 GN=PF3D7_1123900 PE=3 SV=1	37C	1	0.942195	0.9811	0.971778	0.970696	0.967293	0.977958	1.01106	1.00632	1.01996	6	20	2	4.96105	0.63782	3.93103
C6KTB8	Protein kinase PK4 OS=Plasmodium falciparum (isolate 3D7) OX=36329 GN=PF3D7_0628200 PE=4 SV=1	37C	1	0.997913	0.991553	0.971239	0.985956	0.988972	0.992714	1.00711	0.98995	1.0554	9	11	2	97.7806	0.818498	8.03057
Q8I2W5	Dihydrouridine synthase, putative OS=Plasmodium falciparum (isolate 3D7) OX=36329 GN=PF3D7_0918800 PE=4 SV=1	37C	1	1.02384	0.990831	0.993445	0.99915	1.03304	1.01858	1.05093	1.06025	1.07354	6	9	2	5.69058	0.838871	0.736172
Q8IHP6	CAAX farnesyltransferase subunit beta OS=Plasmodium falciparum (isolate 3D7) OX=36329 GN=PF3D7_1147500 PE=3 SV=2	37C	1	0.994016	0.912645	0.900226	0.951949	0.887024	0.955993	0.915499	0.973875	0.892772	10	14	2	0.00480371	0.535203	-4.31917
Q8IEP5	Exosome complex component RRP40, putative OS=Plasmodium falciparum (isolate 3D7) OX=36329 GN=PF3D7_1307000 PE=4 SV=1	37C	1	1.00478	0.999605	1.00753	1.01928	1.00523	0.984996	0.987939	1.00546	0.982517	8	8	2	1.31915	0.500238	-3.43426
O96166	Serine repeat antigen 2 OS=Plasmodium falciparum (isolate 3D7) OX=36329 GN=PF3D7_0207900 PE=3 SV=3	37C	1	0.996448	0.96408	1.01666	0.993566	1.00424	1.01757	1.00271	0.977539	1.07869	4	12	2	245.841	0.706589	2.9662
Q8I523	3-hydroxyisobutyryl-coenzyme A hydrolase, putative OS=Plasmodium falciparum (isolate 3D7) OX=36329 GN=PF3D7_1240000 PE=4 SV=1	37C	1	1.01025	1.00736	1.00531	1.0112	0.990546	0.992532	0.974151	0.998119	0.970639	7	10	2	0.753854	0.651228	-1.75834
Q8I3W2	Ribose-5-phosphate isomerase OS=Plasmodium falciparum (isolate 3D7) OX=36329 GN=PF3D7_0514600 PE=1 SV=1	37C	1	1.00134	0.978018	1.00934	0.967593	0.994092	0.948796	0.958903	0.937825	0.891356	5	11	2	39.1534	0.834208	-0.498382
Q8IKV8	Sortilin OS=Plasmodium falciparum (isolate 3D7) OX=36329 GN=PF3D7_1451800 PE=3 SV=1	37C	1	1.05752	1.04631	1.03973	1.05477	1.00876	1.03065	1.03541	0.998221	0.985965	8	11	2	10.9324	0.413478	-0.862878
A0A143ZXM2	Schizont egress antigen-1 OS=Plasmodium falciparum (isolate 3D7) OX=36329 GN=PF3D7_1021800 PE=4 SV=1	37C	1	1.03398	1.10278	0.9489	1.15495	1.00059	0.963573	0.965287	0.97068	0.967298	11	12	2	0.718397	0.356096	-5.41936
Q8IE97	Uncharacterized protein OS=Plasmodium falciparum (isolate 3D7) OX=36329 GN=PF3D7_1321900 PE=4 SV=1	37C	1	0.983857	0.986552	0.981148	0.979708	0.951698	0.955275	0.850138	0.718994	0.662736	6	16	2	18.1001	0.992887	-1.19945
Q8I5P4	Signal recognition particle subunit SRP19 OS=Plasmodium falciparum (isolate 3D7) OX=36329 GN=PF3D7_1216300 PE=4 SV=1	37C	1	1.04048	1.08769	1.05231	1.06537	1.08429	1.08325	1.09625	1.08195	1.13192	5	8	2	0.0715166	0.801594	0.159393
Q8IHZ1	UVB-resistance protein UVR8 homologue OS=Plasmodium falciparum (isolate 3D7) OX=36329 GN=PF3D7_1137400 PE=4 SV=1	37C	1	1.06494	1.024	1.07217	1.05091	1.02166	1.00129	0.963155	0.893736	0.869969	9	10	2	13.8437	0.9075	-0.978864
Q8I577	Uncharacterized protein OS=Plasmodium falciparum (isolate 3D7) OX=36329 GN=PF3D7_1234500 PE=4 SV=1	37C	1	1.0058	1.02063	1.00224	1.0231	1.07088	1.05893	1.06195	1.11014	1.11287	8	11	2	1.76923	0.895729	0.446005
Q8I6Z2	mRNA (N6-adenosine)-methyltransferase, putative OS=Plasmodium falciparum (isolate 3D7) OX=36329 GN=PF3D7_0729500 PE=3 SV=1	37C	1	0.991609	0.989968	1.01832	0.997949	1.01005	0.96968	0.931827	0.867734	0.843844	9	13	2	15.4374	0.975875	-1.15507
A0A5K1K941	Proteasome maturation factor UMP1, putative OS=Plasmodium falciparum (isolate 3D7) OX=36329 GN=PF3D7_0528000 PE=4 SV=1	37C	1	1.00929	0.994926	1.01148	1.01808	1.04742	1.00958	1.05387	1.06092	1.17328	6	9	2	96.367	0.892037	1.27299
C0H4P9	RNA-binding protein, putative OS=Plasmodium falciparum (isolate 3D7) OX=36329 GN=PF3D7_0728900 PE=3 SV=1	37C	1	1.01146	1.01246	1.00392	0.996804	1.00952	1.00835	1.01796	1.07136	1.03786	10	12	2	16.3935	0.81514	3.28691
Q9U0G8	Uncharacterized protein OS=Plasmodium falciparum (isolate 3D7) OX=36329 GN=PF3D7_0412200 PE=4 SV=1	37C	1	1.00014	0.989124	1.00144	1.00323	1.02353	0.972789	1.01439	1.0485	1.09126	8	11	2	37.0739	0.846226	1.78752
Q8I3X8	AKAP-like protein OS=Plasmodium falciparum (isolate 3D7) OX=36329 GN=PF3D7_0512900 PE=4 SV=1	37C	1	1.00094	0.977364	0.967907	0.975475	0.985667	1.01243	1.07874	1.09706	1.10196	6	17	2	5.70267	0.962287	1.90285
Q8ILS0	H/ACA ribonucleoprotein complex subunit 4, putative OS=Plasmodium falciparum (isolate 3D7) OX=36329 GN=PF3D7_1417500 PE=3 SV=1	37C	1	0.976619	1.00943	0.982613	1.00316	0.995991	1.00268	1.01895	1.0281	1.03786	9	18	2	7.00092	0.749035	1.03637
O96205	Uncharacterized protein OS=Plasmodium falciparum (isolate 3D7) OX=36329 GN=PF3D7_0212500 PE=4 SV=2	37C	1	0.996538	0.96667	0.944767	0.991646	0.980782	0.961823	0.993773	1.06446	1.07457	6	7	2	22.0634	0.839671	2.89262
Q8ILC8	DNA topoisomerase 2 OS=Plasmodium falciparum (isolate 3D7) OX=36329 GN=PF3D7_1433500 PE=3 SV=1	37C	1	1.03184	1.01179	1.01567	1.00878	0.994587	0.987635	1.00688	1.01451	1.00898	11	11	2	0.14548	0.236813	-1.74416
Q8I3F0	Lysine-rich membrane-associated PHISTb protein OS=Plasmodium falciparum (isolate 3D7) OX=36329 GN=PF3D7_0532400 PE=4 SV=1	37C	1	1.03487	1.06627	1.05454	1.04975	1.01817	1.05437	1.01841	1.03808	1.02836	6	9	2	22.7791	0.0293744	-0.637471
A0A5K1K9G4	Rhoptry protein RHOP148 OS=Plasmodium falciparum (isolate 3D7) OX=36329 GN=PF3D7_1366400 PE=4 SV=1	37C	1	1.06399	1.02759	1.07201	1.07393	1.02503	1.00353	0.977771	0.942783	0.951736	11	14	2	4.34004	0.770024	-1.20704
Q8I272	Centrin-1 OS=Plasmodium falciparum (isolate 3D7) OX=36329 GN=PF3D7_0107000.1 PE=3 SV=1	37C	1	0.985942	0.99453	1.03953	0.975475	1.01153	1.04052	1.07665	1.073	1.10196	5	11	2	3.64652	0.832411	1.33888
C0H5G2	Ras-related protein Rab-11B OS=Plasmodium falciparum (isolate 3D7) OX=36329 GN=PF3D7_1340700 PE=4 SV=2	37C	1	1.01994	1.01037	1.03689	1.03409	0.999528	1.05585	1.04984	1.05897	1.07766	5	8	2	2.65705	0.691806	0.306519
P62344	Calcium-dependent protein kinase 1 OS=Plasmodium falciparum (isolate 3D7) OX=36329 GN=CDPK1 PE=1 SV=2	37C	1	1.02291	1.02644	1.04887	1.03463	0.970419	1.06214	1.07447	1.13187	1.08915	11	14	2	4.31629	0.696099	1.97796
Q8I253	Photosensitized INA-labeled protein PHIL1 OS=Plasmodium falciparum (isolate 3D7) OX=36329 GN=PF3D7_0109000 PE=4 SV=1	37C	1	1.03832	1.03318	1.0176	1.0257	1.05451	1.00134	0.999932	0.991026	1.01261	4	10	2	2.16951	0.45168	-3.47474
Q8I250	Tubulin-specific chaperone A OS=Plasmodium falciparum (isolate 3D7) OX=36329 GN=PF3D7_0109400 PE=3 SV=1	37C	1	1.00236	1.00704	1.03175	1.00649	1.05917	1.03008	1.11784	1.14331	1.21121	8	19	2	12.9989	0.934237	0.776708
Q8I4Z8	Zinc finger protein, putative OS=Plasmodium falciparum (isolate 3D7) OX=36329 GN=PF3D7_1243100 PE=4 SV=1	37C	1	0.993078	0.972909	0.971283	0.970632	1.01681	0.952403	0.945436	0.930457	0.897047	8	13	2	16.0643	0.769785	-0.862201
Q7KQL4	DNA polymerase OS=Plasmodium falciparum (isolate 3D7) OX=36329 GN=PF3D7_1017000 PE=3 SV=1	37C	1	0.961658	0.973031	0.916365	0.945732	0.927982	0.930423	0.959125	0.988155	0.97316	11	16	2	30.8618	0.298445	0.000134635
A0A143ZZR4	Phosducin-like protein 2, putative OS=Plasmodium falciparum (isolate 3D7) OX=36329 GN=PF3D7_1036700 PE=3 SV=1	37C	1	0.995696	0.965141	0.91482	1.00253	0.981851	0.94377	1.06199	1.08274	0.921311	4	5	2	6.12576	0.19172	7.10378
Q8IET7	40S ribosomal protein S7 OS=Plasmodium falciparum (isolate 3D7) OX=36329 GN=PF3D7_1302800 PE=1 SV=1	37C	1	1.05637	1.03894	1.0748	1.04561	1.03036	1.0854	1.06406	1.07581	1.11508	9	22	2	0.108568	0.636575	0.142643
Q8ILR6	Ubiquitin fusion degradation protein 1, putative OS=Plasmodium falciparum (isolate 3D7) OX=36329 GN=PF3D7_1418000 PE=3 SV=2	37C	1	1.00682	1.00327	1.00583	1.04305	0.960287	1.01908	0.991265	1.00754	0.963979	7	11	2	0.922266	0.113269	-0.68366
Q8IEM7	Uncharacterized protein OS=Plasmodium falciparum (isolate 3D7) OX=36329 GN=PF3D7_1308700 PE=4 SV=1	37C	1	0.97811	0.9568	0.985636	0.954017	0.990687	0.964523	0.970383	0.992994	0.980803	10	13	2	34.5449	0.258233	0.00014885
Q8IJX5	Phosducin-like protein 3, putative OS=Plasmodium falciparum (isolate 3D7) OX=36329 GN=PF3D7_1006600 PE=4 SV=1	37C	1	0.972501	1.01132	1.00699	0.978216	1.01459	1.03174	1.1363	1.19011	1.1365	7	14	2	5.64391	0.943057	2.16859
Q8I3Q7	U6 snRNA-associated Sm-like protein LSm2 OS=Plasmodium falciparum (isolate 3D7) OX=36329 GN=PF3D7_0520300 PE=3 SV=1	37C	1	1.00829	0.98976	1.02719	1.00973	1.04096	1.03409	1.09162	1.10987	1.16719	4	12	2	13.4348	0.943271	0.654886
Q8IBF1	EMP1-trafficking protein OS=Plasmodium falciparum (isolate 3D7) OX=36329 GN=PF3D7_0731100 PE=4 SV=1	37C	1	1.00522	1.00162	0.998319	1.03145	1.04663	1.01559	1.03539	1.03512	1.08181	10	12	2	4.65239	0.673293	0.327286
Q8IJX3	Single-strand telomeric DNA-binding protein GBP2, putative OS=Plasmodium falciparum (isolate 3D7) OX=36329 GN=PF3D7_1006800 PE=4 SV=1	37C	1	1.02088	1.00615	1.04765	1.03144	1.00238	1.02347	1.03759	1.04645	1.04074	8	16	2	0.0019428	0.387882	0.164218
C6S3I6	Replication factor A protein 3, putative OS=Plasmodium falciparum (isolate 3D7) OX=36329 GN=PF3D7_1442100 PE=3 SV=1	37C	1	1.00284	1.02798	0.997878	0.98382	0.989645	0.937682	0.839476	0.766071	0.724694	2	7	2	10.1783	0.991473	-0.982398
Q8IKR4	SCD domain-containing protein OS=Plasmodium falciparum (isolate 3D7) OX=36329 GN=PF3D7_1456500 PE=4 SV=1	37C	1	0.976557	0.987521	0.933248	0.952846	0.934672	0.94152	0.972884	0.953753	0.937448	11	14	2		0.111331	0.000126193
Q8IJ87	Uncharacterized protein OS=Plasmodium falciparum (isolate 3D7) OX=36329 GN=PF3D7_1031800 PE=4 SV=1	37C	1	0.996901	0.987821	0.98386	1.00112	0.992326	0.999457	0.996766	0.998374	0.976542	11	12	2	14.5273	0.102457	-0.0807382
C0H4L9	Uncharacterized protein OS=Plasmodium falciparum (isolate 3D7) OX=36329 GN=PF3D7_0707200 PE=4 SV=1	37C	1	1.04435	0.993411	1.02949	1.02502	1.01602	1.00713	0.994383	0.991037	0.996454	11	15	2	2.00399	0.380591	-1.89358
C6KT75	Ribonuclease OS=Plasmodium falciparum (isolate 3D7) OX=36329 GN=PF3D7_0623900 PE=3 SV=1	37C	1	1.01622	0.981582	0.96131	0.992149	1.00377	1.00854	0.986487	1.01904	1.02461	5	8	2	0.756963	0.249321	1.42796
Q8IIA8	Small nuclear ribonucleoprotein Sm D1 OS=Plasmodium falciparum (isolate 3D7) OX=36329 GN=PF3D7_1125500 PE=3 SV=1	37C	1	1.01099	1.02129	1.05077	1.01685	0.989055	1.01178	1.00539	0.997138	0.986831	4	13	2	0.292132	0.38144	-2.83424
Q8I1T1	GTP:AMP phosphotransferase OS=Plasmodium falciparum (isolate 3D7) OX=36329 GN=PF3D7_0415600 PE=3 SV=1	37C	1	0.975679	1.03959	1.02751	0.985042	1.00654	1.00995	1.06522	1.02304	1.06038	8	10	2	4.73082	0.491665	5.13651
Q8I3T9	60S ribosomal protein L2 OS=Plasmodium falciparum (isolate 3D7) OX=36329 GN=PF3D7_0516900 PE=1 SV=1	37C	1	1.28261	1.11451	1.05847	1.15804	0.993188	1.02247	1.06309	1.04844	1.09232	5	9	2	0.377123	0.22743	-5.97311
Q8I5Y8	Targeted glyoxalase II OS=Plasmodium falciparum (isolate 3D7) OX=36329 GN=PF3D7_1205700 PE=3 SV=1	37C	1	1.00336	0.976669	1.00126	0.985851	1.04236	1.01792	0.982396	0.995728	1.01536	7	8	2	8.37878	0.0361838	0.236444
Q8IL75	Cytochrome b-c1 complex subunit Rieske, putative OS=Plasmodium falciparum (isolate 3D7) OX=36329 GN=PF3D7_1439400 PE=3 SV=1	37C	1	0.999995	0.999951	0.995489	0.991926	0.990073	1.01437	1.00368	0.995663	0.999111	8	9	2	311.785	0.0118713	0.261367
Q8IDG3	Proteasome subunit alpha type OS=Plasmodium falciparum (isolate 3D7) OX=36329 GN=PF3D7_1353800 PE=1 SV=1	37C	1	0.931862	1.03004	0.953008	0.975545	0.931484	0.966901	0.959405	1.03184	0.970639	7	26	2	22.3122	0.147954	7.0126
Q8IKK4	Replication factor C subunit 3, putative OS=Plasmodium falciparum (isolate 3D7) OX=36329 GN=PF3D7_1463200 PE=3 SV=1	37C	1	1.06738	1.04732	1.07911	1.09135	1.04346	1.02713	1.08537	1.00489	1.00537	4	6	2	32.0663	0.35762	-4.37085
C0H4G3	ADP-ribosylation factor GTPase-activating protein, putative OS=Plasmodium falciparum (isolate 3D7) OX=36329 GN=PF3D7_0526200.1 PE=4 SV=1	37C	1	1.05163	1.03134	1.03985	1.06352	1.09173	1.09884	1.17408	1.17343	1.29344	8	10	2	7.51398	0.917374	0.49879
A0A144A4V4	Vacuolar protein sorting-associated protein 26, putative OS=Plasmodium falciparum (isolate 3D7) OX=36329 GN=PF3D7_1250300 PE=3 SV=1	37C	1	1.04482	0.993985	1.01952	1.01461	0.998411	1.00883	0.959524	0.963651	0.945332	8	16	2	6.69169	0.76677	-3.75602
A0A5K1K9A6	Uncharacterized protein OS=Plasmodium falciparum (isolate 3D7) OX=36329 GN=PF3D7_1351900 PE=4 SV=1	37C	1	0.967934	0.995201	0.970089	0.985431	0.972585	0.938566	0.89586	0.9433	0.855403	6	9	2	30.7381	0.783049	-0.418647
C6KT98	Uncharacterized protein OS=Plasmodium falciparum (isolate 3D7) OX=36329 GN=PF3D7_0626200 PE=4 SV=1	37C	1	0.988237	0.993232	1.0057	1.00764	0.987458	1.00074	0.98288	0.976944	0.998224	8	17	2	6.22769	0.304559	-5.97954
Q8I512	Replication factor C subunit 4, putative OS=Plasmodium falciparum (isolate 3D7) OX=36329 GN=PF3D7_1241700 PE=4 SV=1	37C	1	0.978066	0.996427	0.9451	0.965887	0.926904	0.942429	0.899795	0.872733	0.824047	7	8	2	40.2743	0.927708	-0.348507
Q8IJQ1	MO15-related protein kinase OS=Plasmodium falciparum (isolate 3D7) OX=36329 GN=PF3D7_1014400 PE=4 SV=1	37C	1	0.975858	0.980237	0.994711	0.978187	1.00106	0.966221	0.984931	0.984238	0.952542	6	9	2	2.10199	0.288711	-0.139126
Q8IJK8	60S ribosomal protein L30e, putative OS=Plasmodium falciparum (isolate 3D7) OX=36329 GN=PF3D7_1019400 PE=1 SV=1	37C	1	1.21755	1.0943	1.05443	1.08968	0.968103	0.983651	0.934543	0.894399	0.857361	3	7	2	2.30774	0.713133	-0.622743
C0H489	Protein transport protein Sec24B, putative OS=Plasmodium falciparum (isolate 3D7) OX=36329 GN=PF3D7_0405100 PE=4 SV=1	37C	1	1.01618	1.02377	1.04629	1.07372	1.04092	0.992366	0.992548	0.992381	1.03499	10	11	2	1.20558	0.314646	-5.93665
A0A144A659	DNA primase OS=Plasmodium falciparum (isolate 3D7) OX=36329 GN=PF3D7_1438700 PE=3 SV=1	37C	1	0.992275	0.983489	1.03171	1.03919	1.03535	1.03827	1.04987	1.01479	1.01627	12	14	2	0.028269	0.722688	2.51462
Q8IC33	Uncharacterized protein OS=Plasmodium falciparum (isolate 3D7) OX=36329 GN=PF3D7_0703700 PE=4 SV=1	37C	1	0.994996	0.974615	0.995269	0.919066	0.997622	0.926821	0.922955	0.826891	0.763587	7	28	2	99.6831	0.901604	-0.59792
Q8IB46	Uncharacterized protein OS=Plasmodium falciparum (isolate 3D7) OX=36329 GN=PF3D7_0821200 PE=4 SV=1	37C	1	0.946909	0.981223	0.962092	0.975187	0.967506	0.94935	0.989081	0.941365	0.914565	4	6	2	3.1916	0.411014	-0.132766
Q8I3N5	Pre-mRNA-splicing factor BUD31, putative OS=Plasmodium falciparum (isolate 3D7) OX=36329 GN=PF3D7_0522800 PE=3 SV=1	37C	1	0.964433	0.982641	0.967849	0.953567	1.01123	0.990643	1.05583	1.04952	1.09232	5	11	2	10.7828	0.835464	0.822013
Q8IL98	ATP-dependent Clp protease proteolytic subunit OS=Plasmodium falciparum (isolate 3D7) OX=36329 GN=PF3D7_1436800 PE=1 SV=1	37C	1	0.996823	0.961361	0.97264	0.969816	0.985904	0.950162	0.995634	0.988212	1.01904	4	8	2	10.5647	0.337068	4.92777
Q8I391	TFIIS N-terminal domain-containing protein OS=Plasmodium falciparum (isolate 3D7) OX=36329 GN=PF3D7_0905800 PE=4 SV=1	37C	1	0.989803	1.01246	0.993264	0.997712	0.998698	1.04237	0.989385	0.983798	1.03786	9	10	2	1737.67	0.319996	2.41251
A0A5K1K8V9	Serine/threonine protein kinase, putative OS=Plasmodium falciparum (isolate 3D7) OX=36329 GN=PF3D7_1338900 PE=4 SV=1	37C	1	0.984238	0.983742	0.988841	1.01995	1.00581	1.05278	0.93988	1.02868	0.894193	10	11	2	141.323	0.550255	-6.53598
O77367	E3 ubiquitin-protein ligase RBX1, putative OS=Plasmodium falciparum (isolate 3D7) OX=36329 GN=PF3D7_0319100 PE=4 SV=3	37C	1	0.989942	1.01026	1.01393	0.969531	1.00259	0.952392	0.956501	0.934273	0.918301	3	11	2	7.53905	0.830336	-0.596831
Q8ILJ1	Uncharacterized protein OS=Plasmodium falciparum (isolate 3D7) OX=36329 GN=PF3D7_1427300 PE=4 SV=1	37C	1	0.977808	0.997305	0.955519	0.997571	1.00648	1.0129	1.00478	0.922674	0.967298	10	11	2	23.9605	0.525728	-6.96453
Q8IM43	GTPase-activating protein, putative OS=Plasmodium falciparum (isolate 3D7) OX=36329 GN=PF3D7_1405100 PE=4 SV=2	37C	1	0.997975	0.980571	0.96491	1.00344	0.999002	0.984175	1.02227	1.04253	1.05243	8	15	2	11.8493	0.816825	3.91122
Q7KQK4	Telomere repeat-binding zinc finger protein OS=Plasmodium falciparum (isolate 3D7) OX=36329 GN=PF3D7_1209300 PE=4 SV=1	37C	1	0.967565	0.976001	0.956979	0.956614	0.980567	0.951546	1.00282	0.969919	1.01261	7	8	2	6.90432	0.303582	3.62325
O77395	40S ribosomal protein S15A, putative OS=Plasmodium falciparum (isolate 3D7) OX=36329 GN=PF3D7_0316800 PE=1 SV=1	37C	1	1.03583	1.0612	1.07233	1.07781	1.02272	1.05911	1.03984	1.0226	1.03025	6	15	2	19.8916	0.105469	-1.32009
Q9U0H0	LITAF-like zinc finger protein, putative OS=Plasmodium falciparum (isolate 3D7) OX=36329 GN=PF3D7_0412000 PE=4 SV=1	37C	1	0.974356	1.04132	0.995322	0.995087	0.988872	1.03585	1.00662	1.07722	1.04655	6	16	2	9.51894	0.501063	1.11488
Q8I1W9	Apical sushi protein OS=Plasmodium falciparum (isolate 3D7) OX=36329 GN=PF3D7_0405900 PE=4 SV=1	37C	1	1.03573	0.987979	0.98528	1.017	0.991328	1.01027	0.984646	0.973683	0.966466	5	6	2	2.10296	0.384169	-0.486651
Q8IL54	Maspardin OS=Plasmodium falciparum (isolate 3D7) OX=36329 GN=PF3D7_1441600 PE=4 SV=1	37C	1	1.02916	1.01515	1.02563	1.02497	1.03623	1.04753	1.04118	1.00772	1.01627	5	10	2		0.0656224	6.08463e-05
Q8ID38	Suppressor of kinetochore protein 1, putative OS=Plasmodium falciparum (isolate 3D7) OX=36329 GN=PF3D7_1367000 PE=3 SV=2	37C	1	1.00954	0.991872	1.04238	0.97043	1.00059	1.01872	1.04449	0.949188	1.04171	3	13	2		0.0653482	-0.000128641
Q8I202	Uncharacterized protein OS=Plasmodium falciparum (isolate 3D7) OX=36329 GN=PF3D7_0402400 PE=4 SV=1	37C	1	1.05633	1.02546	1.00193	1.0755	0.995394	1.00521	0.973038	1.01823	1.0554	6	9	2	0.491041	0.0969947	-2.5427
Q8I5F3	Mic1 domain-containing protein OS=Plasmodium falciparum (isolate 3D7) OX=36329 GN=PF3D7_1226400 PE=4 SV=2	37C	1	1.0117	1.03537	1.0407	1.0229	1.01651	1.02622	0.999215	1.00449	1.00898	10	12	2	6.22683	0.326117	-2.91569
Q8I274	Ras-related protein Rab-5C OS=Plasmodium falciparum (isolate 3D7) OX=36329 GN=PF3D7_0106800 PE=4 SV=2	37C	1	1.09466	1.06464	1.07751	1.115	0.997804	1.03396	0.922591	0.869641	0.823443	4	9	2	10.5487	0.867503	-1.04688
Q8IFP2	40S ribosomal protein S19 OS=Plasmodium falciparum (isolate 3D7) OX=36329 GN=PF3D7_0422400 PE=1 SV=1	37C	1	1.05432	1.08648	1.09976	1.07156	1.04192	1.05274	1.06505	1.02449	1.14811	7	15	2	0.133504	0.312869	0.033787
Q8IHZ8	Uncharacterized protein OS=Plasmodium falciparum (isolate 3D7) OX=36329 GN=PF3D7_1136600 PE=4 SV=1	37C	1	1.01072	1.00359	0.983767	1.01282	1.01165	0.975647	0.900756	0.916404	0.847023	7	13	2	8.22432	0.903627	-1.20066
Q8IIQ6	Vacuolar protein sorting-associated protein 35 OS=Plasmodium falciparum (isolate 3D7) OX=36329 GN=PF3D7_1110500 PE=3 SV=1	37C	1	1.09319	1.03242	1.06745	1.05203	1.04721	1.07032	1.03466	0.99548	1.00898	9	11	2	8.36819	0.367786	-2.80961
Q8I359	Apoptosis-related protein OS=Plasmodium falciparum (isolate 3D7) OX=36329 GN=PF3D7_0909300 PE=3 SV=2	37C	1	0.97455	1.00645	0.973053	0.984044	1.01456	0.969881	1.01602	1.00565	0.980803	9	25	2	0.454709	0.0389627	1.02972
Q8I235	Kinesin-8, putative OS=Plasmodium falciparum (isolate 3D7) OX=36329 GN=PF3D7_0111000 PE=3 SV=2	37C	1	0.997153	1.0102	0.992236	0.991094	0.991016	1.0006	1.00715	0.979067	1.00447	7	10	2	1.79794	0.0231381	-0.170909
Q8I227	Uncharacterized protein OS=Plasmodium falciparum (isolate 3D7) OX=36329 GN=PF3D7_0111900 PE=3 SV=1	37C	1	0.962033	0.979158	0.951849	0.997328	0.976306	0.997124	0.935547	0.912965	0.850871	4	11	2	50.2286	0.85758	-1.10461
Q8IC06	Non-specific serine/threonine protein kinase OS=Plasmodium falciparum (isolate 3D7) OX=36329 GN=PF3D7_0708300 PE=3 SV=1	37C	1	0.965113	0.985306	0.998546	0.986295	0.98168	0.995148	0.92803	0.95779	0.888538	4	9	2	72.6405	0.74229	-0.734893
Q8ILE8	60S ribosomal protein L14, putative OS=Plasmodium falciparum (isolate 3D7) OX=36329 GN=PF3D7_1431700 PE=1 SV=1	37C	1	1.10745	1.10833	1.16703	1.13929	1.04353	1.15064	1.13459	1.09805	1.10848	8	10	2	50989	0.543312	-2.82047e-05
C6S3H2	Condensin complex subunit 1, putative OS=Plasmodium falciparum (isolate 3D7) OX=36329 GN=PF3D7_1403100 PE=4 SV=1	37C	1	1.06842	1.00857	1.0087	1.02733	1.02091	1.02166	0.991138	0.986022	0.989437	13	14	2	3.10005	0.391526	-1.83118
Q8IJ73	WD repeat-containing protein 70, putative OS=Plasmodium falciparum (isolate 3D7) OX=36329 GN=PF3D7_1033500 PE=4 SV=1	37C	1	0.991133	0.978403	0.981673	0.982319	0.971009	0.985526	0.982459	0.96697	0.992056	9	10	2	0.00354289	0.376705	-0.0400595
Q8I402	Peptidyl-prolyl cis-trans isomerase OS=Plasmodium falciparum (isolate 3D7) OX=36329 GN=PF3D7_0510200 PE=1 SV=1	37C	1	0.967846	0.967812	0.959587	0.984068	0.974419	0.954684	0.991687	1.01269	1.00717	10	11	2	13.3785	0.607857	3.49012
Q8IE05	Trafficking protein particle complex subunit 2, putative OS=Plasmodium falciparum (isolate 3D7) OX=36329 GN=PF3D7_1332300 PE=4 SV=1	37C	1	1.01616	0.992886	1.04506	1.04879	1.04405	0.99501	1.00789	0.981242	1.04171	4	6	2	4.45451	9.44616e-06	-0.270502
Q8I355	FHA domain protein, putative OS=Plasmodium falciparum (isolate 3D7) OX=36329 GN=PF3D7_0909700 PE=4 SV=1	37C	1	0.996684	1.00697	0.970703	1	0.978637	0.97846	0.977719	0.937589	0.915309	8	8	2	32.8861	0.858768	-1.03301
C6KSV9	SWIB/MDM2 domain-containing protein OS=Plasmodium falciparum (isolate 3D7) OX=36329 GN=PF3D7_0611400 PE=4 SV=1	37C	1	1.03916	1.0047	1.03515	1.03662	0.989082	1.01827	0.924937	0.904653	0.814493	8	9	2	28.5365	0.91613	-0.870633
Q8IHT2	Eukaryotic translation initiation factor 4C OS=Plasmodium falciparum (isolate 3D7) OX=36329 GN=PF3D7_1143400 PE=3 SV=2	37C	1	0.976891	0.984163	0.986279	0.983187	0.972288	1.03427	0.990138	0.999746	0.912338	5	15	2	120.773	0.677434	-6.07573
Q8IKF5	Telomere length and silencing protein 1, putative OS=Plasmodium falciparum (isolate 3D7) OX=36329 GN=PF3D7_1468200 PE=3 SV=1	37C	1	1.008	0.981137	1.00539	1.02251	1.01327	1.05642	1.07348	1.02205	1.09659	6	11	2	1.2311	0.678289	0.744835
Q8ID49	Uncharacterized protein OS=Plasmodium falciparum (isolate 3D7) OX=36329 GN=PF3D7_1366000 PE=4 SV=1	37C	1	0.992602	1.02285	0.979148	1.0413	0.990476	0.94187	0.868458	0.829651	0.772509	4	9	2	10.039	0.954557	-0.932288
Q8IJC7	Centrin-3 OS=Plasmodium falciparum (isolate 3D7) OX=36329 GN=PF3D7_1027700.1 PE=4 SV=2	37C	1	0.94881	0.935203	0.9704	0.954133	0.962032	0.993221	1.15049	1.20533	1.32861	9	14	2	20.2973	0.963799	0.936362
C6KSV2	Uncharacterized protein OS=Plasmodium falciparum (isolate 3D7) OX=36329 GN=PF3D7_0610700 PE=4 SV=1	37C	1	1.00787	1.00527	1.01321	1.02536	0.989331	0.992429	0.929884	0.899458	0.831361	5	9	2	46.6415	0.969292	-0.731544
Q8IKW6	Uncharacterized protein OS=Plasmodium falciparum (isolate 3D7) OX=36329 GN=PF3D7_1451000 PE=4 SV=1	37C	1	0.924206	1.01134	0.926605	0.931129	0.958234	0.974201	1.07109	1.1801	1.35259	6	11	2	67.8995	0.950779	0.912012
Q8I592	Elongation factor G, mitochondrial OS=Plasmodium falciparum (isolate 3D7) OX=36329 GN=PF3D7_1233000 PE=3 SV=1	37C	1	0.989115	0.990224	1.01172	1.00416	0.986599	1.01528	0.984702	0.957979	0.999111	9	10	2	10.2042	0.297841	-2.31071
Q8IBS5	Calcium-dependent protein kinase 4 OS=Plasmodium falciparum (isolate 3D7) OX=36329 GN=CDPK4 PE=1 SV=3	37C	1	1.021	1.0124	1.02027	1.00567	1.02783	1.08411	1.11161	1.12726	1.1684	7	10	2	5.45078	0.966151	0.785839
A0A5K1K8Q9	Golgi protein 1 OS=Plasmodium falciparum (isolate 3D7) OX=36329 GN=PF3D7_1320000 PE=4 SV=1	37C	1	0.988254	1.01712	0.991174	1.03024	0.9631	1.008	0.957913	0.970464	0.943745	9	10	2	5.58629	0.507835	-0.893574
Q8I546	DUF4149 domain-containing protein OS=Plasmodium falciparum (isolate 3D7) OX=36329 GN=PF3D7_1237700 PE=4 SV=1	37C	1	1.24167	1.1366	1.20512	1.21117	1.06555	1.19775	1.19355	1.27331	1.35749	4	12	2	0.176276	0.545133	0.0984702
Q8IAW2	Ubiquitin-conjugating enzyme E2, putative OS=Plasmodium falciparum (isolate 3D7) OX=36329 GN=PF3D7_0812600 PE=3 SV=1	37C	1	0.958207	0.964716	0.929687	0.952139	0.993759	1.06791	1.33966	1.42687	1.47895	2	7	2	6.71559	0.991163	1.6203
O97273	Zinc finger protein, putative OS=Plasmodium falciparum (isolate 3D7) OX=36329 GN=PF3D7_0315800 PE=4 SV=1	37C	1	0.935262	0.9616	0.944271	0.966678	0.965197	0.979548	0.98759	1.05009	1.04851	4	7	2	16.2448	0.80161	3.7278
Q8IJ66	Succinate dehydrogenase [ubiquinone] flavoprotein subunit, mitochondrial OS=Plasmodium falciparum (isolate 3D7) OX=36329 GN=PF3D7_1034400 PE=3 SV=1	37C	1	0.986544	0.983906	0.987682	0.991017	0.990016	0.988143	0.984123	1.011	0.99469	8	10	2	23.3195	0.467609	4.40191
Q8I3V0	BolA-like protein, putative OS=Plasmodium falciparum (isolate 3D7) OX=36329 GN=PF3D7_0515800 PE=1 SV=1	37C	1	0.992264	0.964176	0.962077	0.962785	0.975486	0.940968	0.924142	0.901965	0.897047	5	8	2	9.04428	0.906263	-0.312529
O97256	Activator of Hsp90 ATPase, putative OS=Plasmodium falciparum (isolate 3D7) OX=36329 GN=PF3D7_0308500 PE=3 SV=2	37C	1	1.00294	1.00109	1.0067	0.996842	1.00419	0.994088	1.05735	1.03922	1.04074	3	14	2	5.97481	0.907406	4.00872
Q8IL59	Uncharacterized protein OS=Plasmodium falciparum (isolate 3D7) OX=36329 GN=PF3D7_1441100 PE=4 SV=1	37C	1	0.990778	1.00926	0.959195	1.05383	0.911862	0.921419	0.825464	0.876004	0.824047	2	5	2	1.64038	0.808195	-1.18221
C6KTC5	Glucosamine 6-phosphate N-acetyltransferase OS=Plasmodium falciparum (isolate 3D7) OX=36329 GN=PF3D7_0629000 PE=4 SV=1	37C	1	1.00761	0.956335	0.957159	0.998469	1.02598	0.960714	0.986132	0.999083	0.970639	5	11	2	26.3682	0.0408146	0.000605609
Q8IBZ4	Uncharacterized protein OS=Plasmodium falciparum (isolate 3D7) OX=36329 GN=PF3D7_0709500 PE=4 SV=1	37C	1	0.958209	0.972715	0.956099	0.998285	0.963807	0.980937	0.997821	1.04612	1.01536	6	11	2	13.6506	0.661752	4.17009
Q8IBF4	Uncharacterized protein OS=Plasmodium falciparum (isolate 3D7) OX=36329 GN=PF3D7_0730500 PE=4 SV=1	37C	1	0.948173	0.979257	0.972451	0.990512	0.968958	0.988729	0.970936	0.962348	0.930464	9	12	2	1.58311	0.310583	-0.097851
Q9U0J2	Chaperone protein DnaJ OS=Plasmodium falciparum (isolate 3D7) OX=36329 GN=PF3D7_0409400 PE=3 SV=1	37C	1	1.02427	0.984781	0.987401	1.01237	0.986162	0.957492	0.948653	0.941544	0.95335	6	13	2	1.35572	0.831197	-2.00838
Q8IIK3	Peptidyl-prolyl cis-trans isomerase OS=Plasmodium falciparum (isolate 3D7) OX=36329 GN=PF3D7_1116300 PE=3 SV=1	37C	1	0.968265	0.95888	0.944542	0.97747	0.990841	0.93846	0.941365	0.958132	0.933555	5	10	2	0.150108	0.480741	-0.112717
O97239	Protein dopey homolog PFC0245c OS=Plasmodium falciparum (isolate 3D7) OX=36329 GN=PFC0245c PE=1 SV=1	37C	1	1.02269	0.995896	1.02615	1.01236	1.05524	0.982969	1.02117	1.00831	1.01079	6	10	2	0.0381386	0.0582319	-6.96495e-05
P62368	2-C-methyl-D-erythritol 2,4-cyclodiphosphate synthase, apicoplast OS=Plasmodium falciparum (isolate 3D7) OX=36329 GN=IspF PE=1 SV=1	37C	1	0.966726	0.978213	0.968833	0.967798	0.988091	0.960278	0.952159	0.966257	0.977391	5	9	2	0.000411623	0.495305	-0.0310949
Q8IIE9	Protein GCN20 OS=Plasmodium falciparum (isolate 3D7) OX=36329 GN=PF3D7_1121700 PE=4 SV=1	37C	1	1.03317	1.01216	1.00496	1.02784	1.01146	0.999752	1.01185	0.933679	1.04171	7	10	2	84990.4	0.0330663	-0.180389
Q8I2A8	Nucleoside transporter 4 OS=Plasmodium falciparum (isolate 3D7) OX=36329 GN=PF3D7_0103200 PE=3 SV=1	37C	1	1.22918	1.1186	1.26524	1.2172	1.04299	1.1698	1.01605	1.0146	0.998224	3	9	2	7.46358	0.406191	-4.91648
O96133	Repetitive organellar protein OS=Plasmodium falciparum (isolate 3D7) OX=36329 GN=ROPE PE=1 SV=1	37C	1	0.971533	0.930295	0.933295	0.96927	0.986808	0.959552	0.931276	0.937302	0.935887	10	10	2		0.125083	0.000143513
Q8I3Y9	EKC/KEOPS complex subunit CGI121 OS=Plasmodium falciparum (isolate 3D7) OX=36329 GN=PF3D7_0511700 PE=3 SV=1	37C	1	0.953824	0.91279	0.920988	0.89321	0.977977	0.994196	1.0479	1.08269	1.0715	4	9	2	4.01722	0.798811	1.2677
Q6ZMA7	Sexual stage-specific protein OS=Plasmodium falciparum (isolate 3D7) OX=36329 GN=PF3D7_0406200 PE=4 SV=1	37C	1	1.04804	1.05969	1.06431	1.03937	1.04983	1.06211	1.09446	1.06443	1.14694	3	15	2	0.663702	0.644117	0.171388
Q8I5R9	Dynein light chain OS=Plasmodium falciparum (isolate 3D7) OX=36329 GN=PF3D7_1213600 PE=1 SV=1	37C	1	0.964934	0.966316	0.948192	0.951244	0.977046	0.913072	0.85573	0.833663	0.730344	3	8	2	92.6283	0.94989	-0.526221
O97334	Pre-mRNA-splicing factor PRP46, putative OS=Plasmodium falciparum (isolate 3D7) OX=36329 GN=PF3D7_0302000 PE=4 SV=2	37C	1	1.01032	0.978867	0.953889	0.976441	0.994643	0.9866	1.01964	0.950128	0.963979	7	7	2	0.157524	0.112828	-0.151647
Q8I2H7	General transcription and DNA repair factor IIH helicase subunit XPD OS=Plasmodium falciparum (isolate 3D7) OX=36329 GN=PF3D7_0934100 PE=3 SV=1	37C	1	0.997515	1.0043	0.98636	1.0032	0.971476	0.987628	0.971636	0.934864	0.915309	10	10	2	33.3415	0.912131	-0.820927
Q76NN8	Calcium-transporting ATPase OS=Plasmodium falciparum (isolate 3D7) OX=36329 GN=PF3D7_0106300 PE=4 SV=1	37C	1	1.15016	1.0689	1.13641	1.13242	1.01456	1.0719	1.03579	0.998116	1.00357	9	11	2	0.838684	0.345679	-1.4291
Q8I2T4	Uncharacterized protein OS=Plasmodium falciparum (isolate 3D7) OX=36329 GN=PF3D7_0921900 PE=4 SV=1	37C	1	0.984506	0.998745	0.997415	0.993342	1.01007	1.01097	1.01513	1.06852	1.0554	6	9	2	10.3759	0.871615	1.1715
Q8IAW6	Uncharacterized protein OS=Plasmodium falciparum (isolate 3D7) OX=36329 GN=PF3D7_0813100 PE=4 SV=1	37C	1	1.03159	1.01621	1.01527	1.02715	1.02539	1.00302	1.05911	1.04029	1.06946	6	10	2	1.82917	0.517564	0.260062
C6KSP5	Glyoxalase I-like protein GILP OS=Plasmodium falciparum (isolate 3D7) OX=36329 GN=PF3D7_0604700 PE=4 SV=1	37C	1	1.03334	0.95572	1.01091	0.973041	1.01004	0.993703	1.03219	1.0267	1.05441	3	6	2	7.04099	0.448246	3.31401
Q8II58	tRNA:m(4)X modification enzyme TRM13 OS=Plasmodium falciparum (isolate 3D7) OX=36329 GN=PF3D7_1130600 PE=3 SV=1	37C	1	1.02603	1.02801	1.01462	1.02178	0.997887	0.97107	0.982548	0.932888	0.959044	12	12	2	2.37875	0.823164	-0.919585
C6KSX7	AP-3 complex subunit beta, putative OS=Plasmodium falciparum (isolate 3D7) OX=36329 GN=PF3D7_0613500 PE=3 SV=1	37C	1	0.963406	1.00706	0.95547	1.01827	0.965176	0.964405	0.94244	0.852204	0.853455	7	9	2	15.5374	0.869724	-3.74198
Q8IDS7	Phosphate transporter OS=Plasmodium falciparum (isolate 3D7) OX=36329 GN=PF3D7_1340900 PE=3 SV=1	37C	1	1.05942	1.01362	1.04902	1.07471	1.05449	1.03573	1.0092	1.02826	1.03594	7	15	2	26.8427	0.263791	-0.000170024
C6KTE0	Ribosome biogenesis protein YTM1, putative OS=Plasmodium falciparum (isolate 3D7) OX=36329 GN=PF3D7_0630500 PE=4 SV=1	37C	1	1.05036	0.986794	1.02118	1.0151	1.01047	1.00282	1.00077	0.986477	0.985965	6	9	2	1.00397	0.293814	-0.757712
Q8I261	Proteasome subunit beta OS=Plasmodium falciparum (isolate 3D7) OX=36329 GN=PF3D7_0108000 PE=1 SV=2	37C	1	0.9715	0.999984	0.971455	0.946004	0.935799	0.973958	0.986512	1.0087	0.988566	3	16	2	10.0605	0.247049	2.85808
Q8IKT9	Uncharacterized protein OS=Plasmodium falciparum (isolate 3D7) OX=36329 GN=PF3D7_1453900 PE=4 SV=1	37C	1	1.00393	0.983156	0.984388	0.990449	0.990578	1.01024	0.997268	1.06003	1.03786	7	8	2	20.0505	0.840738	5.76339
Q8IAN4	DNA repair and recombination protein RAD54, putative OS=Plasmodium falciparum (isolate 3D7) OX=36329 GN=PF3D7_0803400 PE=4 SV=1	37C	1	0.957586	1.00733	0.939481	0.965154	0.969366	1.00738	0.956317	0.96463	0.981659	7	8	2	0.000313964	0.142549	3.0489e-05
Q9TY98	Sel1 repeat-containing protein, putative OS=Plasmodium falciparum (isolate 3D7) OX=36329 GN=PF3D7_0204100 PE=4 SV=1	37C	1	1.02531	0.999273	0.984921	1.03493	0.990759	1.04052	1.00638	1.00507	0.985965	11	13	2		0.146591	0.000120892
Q8IE82	60S ribosomal protein L23 OS=Plasmodium falciparum (isolate 3D7) OX=36329 GN=PF3D7_1323400 PE=1 SV=1	37C	1	1.06053	1.05075	1.06972	1.08346	1.07021	1.06844	1.03095	1.0065	0.932007	6	11	2	72.8349	0.754808	-1.36699
A0A5K1K8X0	Uncharacterized protein OS=Plasmodium falciparum (isolate 3D7) OX=36329 GN=PF3D7_1365000 PE=4 SV=1	37C	1	0.795664	0.937854	0.796983	0.82658	0.825213	0.831814	0.878997	0.900675	0.873349	8	10	2	98.0652	0.510806	5.06583e-05
Q8IIU8	40S ribosomal protein S4 OS=Plasmodium falciparum (isolate 3D7) OX=36329 GN=PF3D7_1105400 PE=1 SV=2	37C	1	1.09191	1.1305	1.18494	1.12736	1.09662	1.18031	1.16725	1.13042	1.23925	8	12	2	0.0386617	0.686325	0.111355
C6KT09	Malate:quinone oxidoreductase OS=Plasmodium falciparum (isolate 3D7) OX=36329 GN=PF3D7_0616800 PE=4 SV=1	37C	1	0.99328	0.994599	0.979976	0.991998	0.969019	1.0013	0.946882	0.939019	0.839432	10	15	2	168.928	0.92696	-0.967225
Q8I378	Prefoldin-like protein, putative OS=Plasmodium falciparum (isolate 3D7) OX=36329 GN=PF3D7_0907300 PE=4 SV=1	37C	1	0.981068	0.990038	0.95782	1.01531	0.9602	0.995604	0.950052	1.02556	1.01996	7	8	2	29.4787	0.421457	9.16072
Q8IJM5	Phosphomannomutase OS=Plasmodium falciparum (isolate 3D7) OX=36329 GN=PF3D7_1017400 PE=3 SV=2	37C	1	0.971417	1.01876	1.00256	0.998778	1.01988	0.970956	0.999537	1.0095	1.04851	9	10	2	27.4194	0.384735	1.93436
Q8I5S4	Bromodomain protein 2, putative OS=Plasmodium falciparum (isolate 3D7) OX=36329 GN=PF3D7_1212900 PE=4 SV=1	37C	1	1.00421	1.01586	1.00754	1.02244	1.00808	1.00953	1.02269	1.02353	1.01996	10	14	2	0.0331039	0.559894	0.230267
Q8I6U7	Citrate synthase OS=Plasmodium falciparum (isolate 3D7) OX=36329 GN=PF3D7_1022500 PE=3 SV=1	37C	1	0.977322	0.984146	0.977742	0.97385	1.00117	0.990419	1.01859	1.0362	1.06743	9	10	2	33.3832	0.90996	0.828078
Q8I1Q2	Trafficking protein particle complex subunit OS=Plasmodium falciparum (isolate 3D7) OX=36329 GN=PF3D7_0418500 PE=3 SV=1	37C	1	1.0482	1.02389	1.05495	1.02888	1.06349	1.0006	1.02909	1.0339	1.00447	5	7	2	1.79616	0.138233	-2.25029
Q8I6S4	Peptidyl-prolyl cis-trans isomerase OS=Plasmodium falciparum (isolate 3D7) OX=36329 GN=PF3D7_0804800 PE=3 SV=1	37C	1	0.996383	0.981972	0.975289	0.989915	0.989583	0.986694	0.979592	0.974412	0.961506	7	14	2	2.48062	0.600409	-0.196154
C6KSS4	Spindle assembly abnormal protein 6, putative OS=Plasmodium falciparum (isolate 3D7) OX=36329 GN=PF3D7_0607600 PE=4 SV=1	37C	1	1.0358	1.03475	0.97906	1.0386	1.04256	1.06623	1.07657	1.02458	1.09232	7	9	2	0.468907	0.49842	1.46564
Q8IDB0	40S ribosomal protein S15 OS=Plasmodium falciparum (isolate 3D7) OX=36329 GN=PF3D7_1358800 PE=1 SV=1	37C	1	1.15998	1.19802	1.24632	1.23048	1.14444	1.21622	1.23063	1.29324	1.36574	6	12	2	0.106243	0.78717	0.118332
O97302	Rh5-interacting protein OS=Plasmodium falciparum (isolate 3D7) OX=36329 GN=RIPR PE=1 SV=1	37C	1	0.985021	0.995957	0.97228	0.977576	0.977046	0.962145	0.910423	0.832367	0.801712	12	13	2	18.1247	0.987348	-1.13989
Q8IKH2	AP2 domain transcription factor AP2-EXP OS=Plasmodium falciparum (isolate 3D7) OX=36329 GN=PF3D7_1466400 PE=1 SV=1	37C	1	1.01994	1.03401	1.03458	1.03104	1.04613	1.13061	1.04959	1.03472	1.03214	5	8	2	1.99176	0.230322	0.0907112
Q8IDD4	Serine/threonine protein kinase, putative OS=Plasmodium falciparum (isolate 3D7) OX=36329 GN=PF3D7_1356800 PE=4 SV=1	37C	1	0.945698	0.974822	0.951313	0.984891	0.971966	0.98799	0.959956	0.968709	0.974003	10	11	2	9.67267	0.350567	0.000194427
C6KT66	Chorismate synthase OS=Plasmodium falciparum (isolate 3D7) OX=36329 GN=PF3D7_0623000 PE=3 SV=1	37C	1	0.98	0.973063	0.962228	0.971918	0.996643	1.01565	1.055	1.09648	1.07354	8	11	2	5.00361	0.932637	1.26489
Q8IFN1	Glideosome associated protein with multiple membrane spans 2 OS=Plasmodium falciparum (isolate 3D7) OX=36329 GN=PF3D7_0423500 PE=4 SV=1	37C	1	1.06579	1.06117	1.03275	1.06888	1.04965	0.999992	0.980094	1.00716	1.03119	2	5	2	1.49062	0.453657	-3.0435
Q8IL82	Uncharacterized protein OS=Plasmodium falciparum (isolate 3D7) OX=36329 GN=PF3D7_1438600 PE=3 SV=1	37C	1	1.01435	1.01128	1.02282	1.01195	1.02795	1.00195	1.02236	0.990223	1.02742	6	9	2	6440.79	0.131297	-8.63381e-05
Q8IIL1	Histone-lysine N-methyltransferase SET7 OS=Plasmodium falciparum (isolate 3D7) OX=36329 GN=PF3D7_1115200 PE=4 SV=2	37C	1	0.943001	1.01176	0.978044	0.970825	1.00161	1.01654	1.04246	0.957049	1.08704	7	7	2	4.25878	0.286316	0.529739
A0A144A6T9	NAD(P)H-hydrate epimerase OS=Plasmodium falciparum (isolate 3D7) OX=36329 GN=PF3D7_1459700 PE=3 SV=1	37C	1	0.932195	0.99757	0.890748	0.928091	0.991698	0.979845	1.02849	1.07956	0.887135	5	10	2	232.422	0.0264857	4.34085e-05
Q8ILM7	Uncharacterized protein OS=Plasmodium falciparum (isolate 3D7) OX=36329 GN=PF3D7_1422600 PE=4 SV=1	37C	1	0.989083	1.00799	1.0013	1.02037	0.983908	0.975914	0.844678	0.747991	0.607239	10	15	2	38.0841	0.988128	-0.857791
Q8IM23	rRNA 2'-O-methyltransferase fibrillarin, putative OS=Plasmodium falciparum (isolate 3D7) OX=36329 GN=PF3D7_1407100 PE=3 SV=1	37C	1	1.04521	1.04201	1.04553	1.06584	0.996933	1.05245	0.966178	1.01594	0.99469	7	10	2	5.94829	0.395888	-4.1138
Q8ILM5	Actin-related protein, putative OS=Plasmodium falciparum (isolate 3D7) OX=36329 GN=PF3D7_1422800 PE=3 SV=1	37C	1	1.01994	1.01342	1.00378	1.00491	1.01191	0.99651	0.995602	0.994329	0.95497	9	13	2	12.8665	0.68833	-0.769491
A0A144A1W9	Uncharacterized protein OS=Plasmodium falciparum (isolate 3D7) OX=36329 GN=PF3D7_1409200.1 PE=4 SV=1	37C	1	1.01542	0.963221	0.993723	0.979697	0.979647	0.990773	1	0.973108	0.997338	4	6	2	0.179866	0.0628121	-0.0402385
Q8IB57	Small nuclear ribonucleoprotein G OS=Plasmodium falciparum (isolate 3D7) OX=36329 GN=PF3D7_0822300 PE=3 SV=1	37C	1	0.889338	0.941576	0.90595	0.858623	0.868485	0.884785	0.816333	0.831453	0.761518	5	9	2	6.41079	0.853076	-0.164256
Q8IBZ2	Prodrug activation and resistance esterase OS=Plasmodium falciparum (isolate 3D7) OX=36329 GN=PF3D7_0709700 PE=4 SV=1	37C	1	0.941161	1.00708	0.917865	0.942793	0.899171	0.922549	0.897986	0.936896	0.923583	8	14	2	0.0282206	0.652826	-7.79784
Q8IJE1	Uncharacterized protein OS=Plasmodium falciparum (isolate 3D7) OX=36329 GN=PF3D7_1026000 PE=4 SV=2	37C	1	0.971061	1.00807	0.986903	0.989469	1.01242	1.01802	1.11838	1.17388	1.19702	7	12	2	9.51152	0.981598	1.49034
Q8I5Y6	Uncharacterized protein OS=Plasmodium falciparum (isolate 3D7) OX=36329 GN=PF3D7_1205900 PE=3 SV=1	37C	1	0.99956	0.989943	1.00147	0.997474	0.993019	1.02068	0.999382	0.979874	1.02089	8	10	2	1.33605	0.111646	5.50157
Q8I1X0	Uncharacterized protein OS=Plasmodium falciparum (isolate 3D7) OX=36329 GN=PF3D7_0405800 PE=4 SV=1	37C	1	1.01116	1.06292	1.06148	1.00387	1.02749	0.998026	1.07846	1.0026	1.07457	8	14	2	2.91661	0.12995	0.0645955
Q8IEH3	Uncharacterized protein OS=Plasmodium falciparum (isolate 3D7) OX=36329 GN=PF3D7_1314100 PE=4 SV=1	37C	1	1.0563	1.02553	1.04247	1.06251	0.99996	1.13484	1.01918	1.16799	1.05441	8	8	2	4.96022	0.253341	0.175121
O97319	Elongation factor 1-delta, putative OS=Plasmodium falciparum (isolate 3D7) OX=36329 GN=PF3D7_0319600 PE=3 SV=2	37C	1	0.981277	0.998895	0.99775	0.989895	0.947416	0.947424	0.902983	0.88982	0.852161	3	15	2	12.4421	0.963191	-0.509932
Q8IIS0	D-aminoacyl-tRNA deacylase OS=Plasmodium falciparum (isolate 3D7) OX=36329 GN=DTD PE=1 SV=1	37C	1	1.01275	1.00271	1.01552	0.990116	1.02784	0.99461	1.01364	0.995737	0.990308	6	9	2	0.0284131	0.0171368	-0.30287
Q8I0V0	Subtilisin-like protease 1 OS=Plasmodium falciparum (isolate 3D7) OX=36329 GN=SUB1 PE=1 SV=1	37C	1	1.00726	0.971833	0.997172	0.94447	1.04387	1.02028	1.08714	1.09947	1.16477	5	9	2	12.6068	0.854339	0.753105
Q8IIR0	Pre-mRNA-processing factor 6, putative OS=Plasmodium falciparum (isolate 3D7) OX=36329 GN=PF3D7_1110200 PE=4 SV=1	37C	1	1.03929	1.0378	1.01601	1.01738	1.04294	1.0817	1.11109	1.13917	1.1844	10	10	2	8.24055	0.950712	0.735036
Q8IE73	PRELI domain-containing protein, putative OS=Plasmodium falciparum (isolate 3D7) OX=36329 GN=PF3D7_1324400 PE=4 SV=1	37C	1	0.939738	0.970011	0.865102	0.861362	0.896337	0.845436	0.823949	0.753224	0.892772	4	8	2	0.0274533	0.676375	-0.495785
Q8IE99	Splicing factor 1 OS=Plasmodium falciparum (isolate 3D7) OX=36329 GN=PF3D7_1321700 PE=4 SV=1	37C	1	1.03315	1.00493	1.03887	1.03607	1.03738	1.02347	1.08318	1.03454	1.11952	6	11	2	2.45906	0.555246	0.290047
Q8IK01	Inner membrane complex protein 1c, putative OS=Plasmodium falciparum (isolate 3D7) OX=36329 GN=PF3D7_1003600 PE=4 SV=1	37C	1	0.995728	1.0207	1.04213	1.01333	1.0418	1.07003	1.06829	1.10352	1.11177	8	17	2	1.79415	0.906135	0.420743
Q8I1S2	Repressor of RNA polymerase III transcription MAF1 OS=Plasmodium falciparum (isolate 3D7) OX=36329 GN=PF3D7_0416500 PE=4 SV=1	37C	1	1.00669	1.03746	1.01125	1.04618	0.982121	1.04296	0.960973	0.954347	0.97316	5	11	2	7.51637	0.619369	-4.27068
Q8IKK1	Fam-a protein OS=Plasmodium falciparum (isolate 3D7) OX=36329 GN=PF3D7_1463500 PE=4 SV=1	37C	1	0.811869	0.963729	0.849564	0.818187	0.81759	0.80916	0.859375	0.74549	0.865281	6	11	2	0.000230156	0.52464	-0.204522
A0A5K1K9E3	Uncharacterized protein OS=Plasmodium falciparum (isolate 3D7) OX=36329 GN=PF3D7_0509300 PE=4 SV=1	37C	1	0.982363	1.00906	0.997738	0.974907	1.01099	1.03208	1.13801	1.16616	1.18316	6	12	2	6.35473	0.981979	1.7503
Q8ILR4	Uncharacterized protein OS=Plasmodium falciparum (isolate 3D7) OX=36329 GN=PF3D7_1418200 PE=4 SV=2	37C	1	0.769653	0.947537	0.75658	0.750613	0.781925	0.776838	0.835227	0.861614	0.828298	4	8	2	645204	0.49521	2.89552e-05
Q9U0K5	Uncharacterized protein OS=Plasmodium falciparum (isolate 3D7) OX=36329 GN=PF3D7_0408100 PE=4 SV=2	37C	1	1.003	0.987297	0.998556	1.01675	0.995974	1.00458	0.967797	1.00553	1.0369	8	12	2	1.99031	0.0593721	0.322152
Q8IHX2	AP2 domain transcription factor, putative OS=Plasmodium falciparum (isolate 3D7) OX=36329 GN=PF3D7_1139300 PE=4 SV=1	37C	1	0.981187	0.99257	0.954315	0.975238	0.95335	0.997817	0.936095	0.918141	0.90865	11	12	2	11.012	0.763424	-5.19902
A0A5K1K942	Uncharacterized protein OS=Plasmodium falciparum (isolate 3D7) OX=36329 GN=PF3D7_1369600 PE=4 SV=1	37C	1	0.974802	1.0198	0.980127	0.995738	0.991182	0.993851	0.959149	0.96089	0.956596	6	7	2	6.48946	0.66415	-5.28553
Q8I476	Merozoite surface protein 8 OS=Plasmodium falciparum (isolate 3D7) OX=36329 GN=PF3D7_0502400 PE=4 SV=1	37C	1	1.15305	1.08627	1.10637	1.11791	1.01371	1.03849	0.95494	0.917279	0.916803	7	12	2	3.59682	0.738246	-0.954168
Q8IK89	Trailer hitch homolog, putative OS=Plasmodium falciparum (isolate 3D7) OX=36329 GN=PF3D7_1474900 PE=4 SV=1	37C	1	1.03577	0.97622	0.942126	0.968653	1.01315	0.916051	0.898433	0.873231	0.830746	4	6	2	25.3057	0.81445	-0.45891
Q8IKW1	Pre-mRNA-splicing factor CWF18, putative OS=Plasmodium falciparum (isolate 3D7) OX=36329 GN=PF3D7_1451500 PE=4 SV=1	37C	1	0.926731	0.946022	0.91183	0.925352	0.966783	1.00626	1.08629	1.13324	1.18067	5	8	2	9.17209	0.932898	0.986363
Q8I5I8	Glideosome-associated protein 45 OS=Plasmodium falciparum (isolate 3D7) OX=36329 GN=PF3D7_1222700 PE=4 SV=1	37C	1	1.0635	0.993714	1.02022	1.0334	1.00335	1.03107	1.02066	1.04936	1.04364	7	8	2	1.96605	0.179164	0.0310427
O96150	DNA-directed RNA polymerase II 16 kDa subunit, putative OS=Plasmodium falciparum (isolate 3D7) OX=36329 GN=PF3D7_0205500 PE=4 SV=1	37C	1	0.965252	1.00238	1.01715	0.995487	1.00586	0.996027	1.01096	0.932208	1.00447	5	10	2	21.7154	0.230497	-3.82839
Q8IKD1	Uncharacterized protein OS=Plasmodium falciparum (isolate 3D7) OX=36329 GN=PF3D7_1470700 PE=4 SV=1	37C	1	1.04205	1.02854	1.06644	1.04227	1.07812	1.05876	1.08406	1.10137	1.10739	6	7	2	0.124698	0.857918	0.227348
Q8IC12	E3 ubiquitin-protein ligase, putative OS=Plasmodium falciparum (isolate 3D7) OX=36329 GN=PF3D7_0707700 PE=4 SV=1	37C	1	0.986573	0.962717	0.978309	1.00144	0.99346	0.981839	0.977591	0.9963	0.993811	9	13	2	0.0809907	0.113291	2.61775
Q8IDA4	RNA-binding protein, putative OS=Plasmodium falciparum (isolate 3D7) OX=36329 GN=PF3D7_1360100 PE=4 SV=1	37C	1	0.98997	0.973983	0.987734	0.998097	0.985381	1.01279	1.01665	1.03635	1.0654	7	11	2	24.8439	0.901162	0.750543
Q8I2K4	Nucleolar protein Nop52, putative OS=Plasmodium falciparum (isolate 3D7) OX=36329 GN=PF3D7_0931100 PE=4 SV=1	37C	1	1.22482	0.982954	1.01022	0.994398	1.00533	0.977679	0.973618	0.944395	0.985965	6	9	2	0.00746139	0.481554	-9.6135
A0A5K1K8M9	Exosome complex component RRP42, putative OS=Plasmodium falciparum (isolate 3D7) OX=36329 GN=PF3D7_1340100 PE=4 SV=1	37C	1	1.02227	1.04604	1.00005	1.00038	1.00602	0.985329	0.932512	0.955309	0.854753	4	6	2	14.7791	0.821302	-0.649971
Q8IK04	N-terminal acetyltransferase A complex catalytic subunit ARD1, putative OS=Plasmodium falciparum (isolate 3D7) OX=36329 GN=PF3D7_1003300 PE=4 SV=1	37C	1	0.962391	1.01641	0.969654	1.01391	0.965172	1.02524	0.995901	1.02753	0.975694	5	10	2	1.69083	0.12031	3.93128
Q8IEG2	Uncharacterized protein OS=Plasmodium falciparum (isolate 3D7) OX=36329 GN=PF3D7_1315300 PE=4 SV=1	37C	1	0.941247	0.9704	0.924707	0.935899	0.955508	0.997828	1.08648	1.1559	1.12625	4	8	2	6.8513	0.929312	1.72191
Q8IJ21	Serine/threonine protein kinase, FIKK family OS=Plasmodium falciparum (isolate 3D7) OX=36329 GN=PF3D7_1039000 PE=4 SV=1	37C	1	0.964915	0.959361	0.970571	1.01539	1.00246	0.993886	1.00863	1.02107	1.08285	8	8	2	14.4906	0.673364	0.552014
Q8IAW3	U1 small nuclear ribonucleoprotein C OS=Plasmodium falciparum (isolate 3D7) OX=36329 GN=PF08_0084 PE=3 SV=1	37C	1	0.982972	0.949889	0.980071	1.0371	1.02154	1.03773	1.02954	1.06485	1.04461	2	5	2	0.0980482	0.78588	3.01307
O96271	Replication factor C subunit 1 OS=Plasmodium falciparum (isolate 3D7) OX=36329 GN=PF3D7_0219600 PE=3 SV=1	37C	1	0.968988	1.00703	0.984057	1.02196	0.970195	1.01091	0.952187	1.0345	0.985101	10	11	2	0.944507	0.00779234	8.05165e-05
C6KSR6	VFT protein OS=Plasmodium falciparum (isolate 3D7) OX=36329 GN=PF3D7_0606800 PE=1 SV=1	37C	1	1.19055	1.04954	1.14396	1.19144	1.01524	1.12395	1.03037	1.09639	1.02182	4	8	2	5.05023	0.102587	-0.915192
Q8IHX9	Beta-catenin-like protein 1, putative OS=Plasmodium falciparum (isolate 3D7) OX=36329 GN=PF3D7_1138600 PE=4 SV=2	37C	1	1.08195	1.03356	1.0604	1.04469	1.03903	1.02437	1.00141	1.04489	0.990308	5	6	2	1.90248	0.267529	-1.77665
Q8IDG6	Ran-binding protein, putative OS=Plasmodium falciparum (isolate 3D7) OX=36329 GN=PF3D7_1353400 PE=4 SV=1	37C	1	0.960896	1.0003	0.950539	0.985023	0.997116	0.979507	1.00645	1.03545	1.04949	9	9	2	17.5233	0.712958	1.61925
A0A5K1K8R1	Uncharacterized protein OS=Plasmodium falciparum (isolate 3D7) OX=36329 GN=PF3D7_1317300 PE=4 SV=1	37C	1	1.00508	0.994822	0.967314	0.985233	1.06926	0.984402	0.868008	0.848551	0.780014	5	6	2	8.91214	0.882382	-2.10477
Q8I4Z4	Translation initiation factor SUI1, putative OS=Plasmodium falciparum (isolate 3D7) OX=36329 GN=PF3D7_1243600 PE=3 SV=1	37C	1	0.998422	1.03082	1.08097	1.00704	1.05641	1.05693	1.18206	1.14155	1.18565	3	9	2	4.20392	0.852183	4.67156
Q8I468	Serine/arginine-rich splicing factor 12 OS=Plasmodium falciparum (isolate 3D7) OX=36329 GN=PF3D7_0503300 PE=4 SV=1	37C	1	1.03173	1.06212	1.09561	1.0782	0.999625	1.08904	1.04706	1.0805	1.18067	7	8	2	4.60876	0.407695	0.176292
A0A5K1K910	Aspartate carbamoyltransferase OS=Plasmodium falciparum (isolate 3D7) OX=36329 GN=PF3D7_1344800 PE=3 SV=1	37C	1	1.25714	1.14299	1.22764	1.20985	1.06497	1.11143	1.05429	1.07505	1.1365	5	8	2	0.411357	0.246789	-5.54168
Q8ILP0	DIX domain-containing protein, putative OS=Plasmodium falciparum (isolate 3D7) OX=36329 GN=PF3D7_1421000 PE=4 SV=1	37C	1	0.998138	1.01294	1.01045	1.00694	1.00883	0.991126	1.02062	1.01197	1.04461	3	8	2	26.2049	0.585513	1.24363
A0A143ZWF7	Tetratricopeptide repeat protein, putative OS=Plasmodium falciparum (isolate 3D7) OX=36329 GN=PF3D7_0720900 PE=4 SV=1	37C	1	1.01918	0.96585	1.00773	1.0387	1.01915	0.958834	0.915792	0.885233	0.835067	4	6	2	12.6585	0.897427	-0.980572
O77317	Phosphatidate phosphatase OS=Plasmodium falciparum (isolate 3D7) OX=36329 GN=PF3D7_0303200 PE=3 SV=4	37C	1	0.959561	0.968728	0.930667	0.947369	0.957469	0.958217	0.987532	1.03742	1.02368	8	16	2	13.7524	0.735253	4.09491
Q8IKE6	Uncharacterized protein OS=Plasmodium falciparum (isolate 3D7) OX=36329 GN=PF3D7_1469100 PE=3 SV=1	37C	1	0.969266	0.992486	1.02644	1.01072	1.04677	1.02901	1.01807	0.993712	1.01536	6	7	2	0.018824	0.473179	1.50794
Q8IKX7	Uncharacterized protein OS=Plasmodium falciparum (isolate 3D7) OX=36329 GN=PF3D7_1449800 PE=4 SV=1	37C	1	1.02614	1.00955	1.01605	0.995878	1.0134	0.97917	0.968372	0.941999	0.853455	6	17	2	139.187	0.94887	-0.761262
Q8I236	Adenylate kinase isoenzyme 6 homolog OS=Plasmodium falciparum (isolate 3D7) OX=36329 GN=PFA_0530c PE=1 SV=1	37C	1	1.05502	1.01409	1.07527	1.07661	1.04071	1.03643	1.0257	0.994501	1.01719	3	7	2	7.379	0.282715	-1.71912
Q8I5L3	Ribulose-phosphate 3-epimerase OS=Plasmodium falciparum (isolate 3D7) OX=36329 GN=PF3D7_1219900 PE=1 SV=1	37C	1	0.972102	0.929675	0.963011	0.952734	0.981369	0.968217	0.976567	1.02285	0.99469	4	7	2	15.0262	0.452058	6.40185
Q8IL40	Uncharacterized protein OS=Plasmodium falciparum (isolate 3D7) OX=36329 GN=PF3D7_1443100 PE=4 SV=1	37C	1	1.01898	1.03174	1.00546	1.03571	1.04114	1.01291	1.04223	1.07488	1.05342	8	9	2	0.949335	0.590404	0.239082
Q8IDJ7	Small nuclear ribonucleoprotein E OS=Plasmodium falciparum (isolate 3D7) OX=36329 GN=PF3D7_1350200 PE=3 SV=1	37C	1	0.926164	0.953238	0.934885	0.910496	0.937223	0.946827	1.00957	1.00568	1.0654	2	12	2	28.5191	0.71169	0.940208
Q8IM34	RNA-binding protein 8A, putative OS=Plasmodium falciparum (isolate 3D7) OX=36329 GN=PF3D7_1406000 PE=4 SV=1	37C	1	0.997429	1.00791	0.988239	0.990698	1.02183	0.985238	0.9558	1.01148	0.95416	3	10	2	3.09186	0.338211	-3.21141
Q8I5Q6	Thioredoxin peroxidase 2 OS=Plasmodium falciparum (isolate 3D7) OX=36329 GN=PF3D7_1215000 PE=1 SV=1	37C	1	1.00349	0.977257	0.975998	0.992367	0.956311	0.9835	0.972108	0.977385	0.95416	4	8	2	0.401707	0.494777	-0.228172
Q8I2Y6	Protein-lysine N-methyltransferase PF3D7_0916600 OS=Plasmodium falciparum (isolate 3D7) OX=36329 GN=PF3D7_0916600 PE=3 SV=1	37C	1	0.955665	0.988141	1.02348	1.00112	0.993249	0.986125	0.997325	0.922315	0.932007	6	9	2	24.6698	0.729829	-8.76989
C0H4C4	Uncharacterized protein OS=Plasmodium falciparum (isolate 3D7) OX=36329 GN=PF3D7_0504800 PE=4 SV=1	37C	1	1.0535	0.974271	1.00261	1.01105	1.00562	1.00008	1.02919	1.02796	1.02742	10	11	2		0.0908204	-0.000105241
B9ZSI0	Uncharacterized protein OS=Plasmodium falciparum (isolate 3D7) OX=36329 GN=PF3D7_0103300 PE=4 SV=1	37C	1	1.04178	0.9863	0.994427	1.03628	0.978865	1.033	1.00761	1.00866	1.04655	6	6	2	0.464391	0.0732777	0.188692
Q8I2Q4	Serine/threonine-protein phosphatase OS=Plasmodium falciparum (isolate 3D7) OX=36329 GN=PF3D7_0925400 PE=3 SV=1	37C	1	0.942298	1.01573	0.942183	1.0053	0.97282	1.03675	0.986915	1.06547	0.972318	5	5	2	1.46619	0.218085	6.65186
Q8I408	Asparagine--tRNA ligase OS=Plasmodium falciparum (isolate 3D7) OX=36329 GN=PF3D7_0509600 PE=3 SV=1	37C	1	1.00085	0.984335	0.981199	0.982218	1.0194	1.03657	1.09142	1.09367	1.10739	9	11	2	3.48207	0.964806	1.17487
Q8I5K4	Heterochromatin protein 1 OS=Plasmodium falciparum (isolate 3D7) OX=36329 GN=PF3D7_1220900 PE=1 SV=1	37C	1	1.01789	0.995521	1.00277	0.983187	1.0427	0.994722	1.0758	1.09552	1.12738	6	9	2	10.477	0.873916	3.61448
Q8IBZ9	Putative chloroquine resistance transporter OS=Plasmodium falciparum (isolate 3D7) OX=36329 GN=CG10 PE=3 SV=1	37C	1	1.2598	1.11892	1.18083	1.16213	1.027	1.043	0.878814	0.854045	0.76619	5	6	2	6.39109	0.800894	-0.830437
Q8I563	Vesicle transport v-SNARE protein VTI1, putative OS=Plasmodium falciparum (isolate 3D7) OX=36329 GN=PF3D7_1236000 PE=4 SV=1	37C	1	0.98917	0.984583	0.988605	1.00849	0.983115	0.999854	1.00663	1.03052	0.997338	7	12	2	5.48983	0.407875	1.87899
Q8IIS8	DNA repair protein RAD51 homolog OS=Plasmodium falciparum (isolate 3D7) OX=36329 GN=PF3D7_1107400 PE=3 SV=2	37C	1	1.0687	0.9755	1.06376	1.01159	1.03252	1.01531	1.09168	1.01343	1.11952	3	4	2	10.1827	0.264713	0.724851
Q8I427	Protein CAF40, putative OS=Plasmodium falciparum (isolate 3D7) OX=36329 GN=PF3D7_0507600 PE=4 SV=1	37C	1	1.00079	1.01401	0.99822	1.02429	0.980381	1.01037	1.01806	0.954783	0.959044	6	7	2	28.1479	0.732095	-5.12441
C0H564	Monocarboxylate transporter, putative OS=Plasmodium falciparum (isolate 3D7) OX=36329 GN=PF3D7_0926400 PE=4 SV=1	37C	1	1.08121	1.05177	1.0785	1.10999	1.01071	1.04607	0.982384	0.994434	0.992933	7	13	2	2.7195	0.474727	-1.26927
C0H561	Thioredoxin-like protein 2 OS=Plasmodium falciparum (isolate 3D7) OX=36329 GN=PF3D7_0925500 PE=4 SV=1	37C	1	0.986603	1.02084	1.0301	0.988398	1.01071	0.99363	0.993697	0.991477	0.992933	3	11	2		0.066416	6.05766e-05
Q8I3V1	Glideosome-associated protein 40, putative OS=Plasmodium falciparum (isolate 3D7) OX=36329 GN=PF3D7_0515700 PE=4 SV=1	37C	1	1.0237	1.00051	1.00295	1.02578	0.98515	0.988564	0.999365	1.00975	1.03594	6	13	2	3.79831	0.0315544	0.191832
Q8I1S0	Small GTP-binding protein sar1 OS=Plasmodium falciparum (isolate 3D7) OX=36329 GN=PF3D7_0416800 PE=3 SV=1	37C	1	1.06135	1.06274	1.12872	1.10503	1.08769	1.12734	1.1174	1.04414	1.20085	5	8	2	0.124711	0.496079	0.126715
Q8I5Q2	Uncharacterized protein OS=Plasmodium falciparum (isolate 3D7) OX=36329 GN=PF3D7_1215400 PE=4 SV=1	37C	1	1.00317	1.00011	1.01151	1.04119	1.0224	1.05118	1.05072	1.11997	1.08704	5	7	2	4.53024	0.846517	0.490967
C0H469	Phosphoglycerate mutase, putative OS=Plasmodium falciparum (isolate 3D7) OX=36329 GN=PF3D7_0310300 PE=4 SV=1	37C	1	0.941413	0.938535	0.938933	0.970864	0.951679	0.991397	0.960225	0.948859	1.00627	7	8	2	37.7448	0.148568	0.710469
O97306	Uncharacterized protein OS=Plasmodium falciparum (isolate 3D7) OX=36329 GN=PF3D7_0323800 PE=4 SV=3	37C	1	0.983733	0.97923	0.985777	0.99043	0.998642	0.956286	0.875662	0.830205	0.752847	6	6	2	23.17	0.980117	-0.882
A0A5K1K8R6	Protein BCP1, putative OS=Plasmodium falciparum (isolate 3D7) OX=36329 GN=PF3D7_1323900 PE=3 SV=1	37C	1	1.00133	0.980881	0.982831	1.00357	0.981907	0.975093	0.964582	0.983371	0.932007	7	9	2	11.4973	0.61659	-0.498746
O97277	Kinesin-8, putative OS=Plasmodium falciparum (isolate 3D7) OX=36329 GN=PF3D7_0319400 PE=3 SV=2	37C	1	1.0451	1.02585	1.03838	1.03256	1.03472	1.00363	1.00518	0.934794	0.990308	8	10	2	9.23304	0.631239	-1.57226
A0A144A2U7	RAP protein, putative OS=Plasmodium falciparum (isolate 3D7) OX=36329 GN=PF3D7_1470600 PE=4 SV=1	37C	1	1.03235	1.04867	1.03314	1.07117	1.00166	1.03858	0.968949	0.973172	0.976542	6	8	2	4.38076	0.610096	-2.38781
A0A5K1K8Z5	Uncharacterized protein OS=Plasmodium falciparum (isolate 3D7) OX=36329 GN=PF3D7_1349600 PE=4 SV=1	37C	1	0.951708	0.957397	0.958804	1.00967	0.985535	0.98523	0.963386	0.967356	0.976542	5	8	2	8.09528	0.197524	5.7831e-05
C6S3G2	Alpha/beta hydrolase, putative OS=Plasmodium falciparum (isolate 3D7) OX=36329 GN=PF3D7_1143000 PE=4 SV=1	37C	1	1.00703	1.00822	1.03519	0.98852	1.038	0.993854	1.04794	0.981497	1.01627	8	10	2	0.107434	0.0332226	-0.00348604
O77391	CS domain-containing protein OS=Plasmodium falciparum (isolate 3D7) OX=36329 GN=PF3D7_0316400 PE=4 SV=1	37C	1	0.826124	0.968209	0.824627	0.822193	0.789406	0.820704	0.7544	0.781863	0.757412	7	8	2	0.0339756	0.739491	-0.188898
Q8IKM8	Ubiquitin carboxyl-terminal hydrolase UCHL3 OS=Plasmodium falciparum (isolate 3D7) OX=36329 GN=UCHL3 PE=1 SV=2	37C	1	0.799413	0.91685	0.784636	0.821094	0.998171	1.09538	2.08255	2.71376	3.03784	5	9	2	11.2633	0.991127	1.42337
Q8IJW3	Histone deacetylase 2 OS=Plasmodium falciparum (isolate 3D7) OX=36329 GN=PF3D7_1008000 PE=4 SV=1	37C	1	1.00583	0.973164	0.988801	0.994978	0.984257	1.00553	0.962874	0.963336	1.0369	8	8	2	1.62589e+06	0.0173363	4.88776e-05
O77316	RNA-binding protein, putative OS=Plasmodium falciparum (isolate 3D7) OX=36329 GN=PF3D7_0302800 PE=4 SV=1	37C	1	1.00798	1.01635	0.996849	0.995598	1.00171	1.00224	0.996022	0.9718	1.01353	6	8	2	0.117224	0.136912	-0.760311
Q8I1T3	Coatomer subunit zeta OS=Plasmodium falciparum (isolate 3D7) OX=36329 GN=PF3D7_0415400 PE=3 SV=1	37C	1	1.06677	1.02999	1.03811	1.00666	1.04434	1.02722	1.04469	1.00399	1.03214	2	4	2	1.994	0.00938248	-0.576457
Q8I5B2	Pre-mRNA-splicing regulator, putative OS=Plasmodium falciparum (isolate 3D7) OX=36329 GN=PF3D7_1230800 PE=3 SV=2	37C	1	0.98895	0.991622	0.955296	0.986701	0.98665	0.97682	0.949925	0.987044	1.00447	6	6	2	0.143992	0.116572	6.48614e-05
Q8I353	Helicase SKI2W, putative OS=Plasmodium falciparum (isolate 3D7) OX=36329 GN=PF3D7_0909900 PE=4 SV=1	37C	1	1.02289	1.02374	1.01497	1.03334	1.01278	1.00278	1.05902	1.02224	1.08181	9	10	2	10.5142	0.475517	1.39844
Q8IAZ8	Phosphopantothenoylcysteine decarboxylase, putative OS=Plasmodium falciparum (isolate 3D7) OX=36329 GN=PF3D7_0816100 PE=4 SV=1	37C	1	1.02096	1.03321	1.03607	1.00181	1.02965	1.03673	1.07468	1.1101	1.12064	5	10	2	10.1819	0.922387	1.25845
Q8IEE9	Choline-phosphate cytidylyltransferase OS=Plasmodium falciparum (isolate 3D7) OX=36329 GN=PF3D7_1316600 PE=1 SV=1	37C	1	0.997845	1.0553	1.00229	1.02785	1.00231	0.984129	0.855429	0.865395	0.785465	7	7	2	6.65834	0.921059	-1.88566
Q8ID59	DNA-directed RNA polymerases I, II, and III subunit RPABC1, putative OS=Plasmodium falciparum (isolate 3D7) OX=36329 GN=PF3D7_1364800 PE=3 SV=1	37C	1	1.00624	1.00426	0.975838	0.984838	0.949154	0.972765	0.936407	0.953602	0.943745	6	14	2	0.181772	0.820656	-0.681055
Q8I318	EFP domain-containing protein OS=Plasmodium falciparum (isolate 3D7) OX=36329 GN=PF3D7_0913400 PE=3 SV=1	37C	1	1.01801	1.00734	1.03043	1.02876	1.07225	1.06897	1.043	1.04388	1.06339	5	7	2	0.0737485	0.766486	1.0289
Q8I3P6	DEAD box protein 1 OS=Plasmodium falciparum (isolate 3D7) OX=36329 GN=PF3D7_0521700 PE=3 SV=1	37C	1	0.896535	1.01735	0.919557	0.964885	0.966942	0.995947	1.0882	1.10527	1.16236	8	8	2	9.34992	0.817296	1.09871
Q8IEM3	60S ribosomal protein L24, putative OS=Plasmodium falciparum (isolate 3D7) OX=36329 GN=PF3D7_1309100 PE=1 SV=1	37C	1	1.03564	1.04713	1.03383	1.02936	1.02218	1.02189	0.976039	0.944745	0.865281	5	11	2	47.4797	0.939285	-0.952806
Q9NFE6	Eukaryotic translation initiation factor 3 subunit K OS=Plasmodium falciparum (isolate 3D7) OX=36329 GN=PF3D7_0310600.1 PE=3 SV=1	37C	1	1.03437	1.02866	1.02333	1.01713	1.0069	0.955698	0.854633	0.702101	0.636106	4	6	2	17.2766	0.995797	-1.05244
Q8IEU2	Gamete antigen 27/25 OS=Plasmodium falciparum (isolate 3D7) OX=36329 GN=PF3D7_1302100 PE=1 SV=1	37C	1	0.941483	0.959855	0.904822	0.946422	1.00941	0.99613	1.13109	1.23247	1.20085	8	11	2	8.1528	0.931316	1.691
Q8IIG9	Alternative splicing factor ASF-1, putative OS=Plasmodium falciparum (isolate 3D7) OX=36329 GN=PF3D7_1119800 PE=4 SV=1	37C	1	0.977555	0.998516	0.970659	1.00666	0.979638	0.977315	0.96438	1.02293	0.993811	8	11	2	25.8913	0.27957	4.2141
Q8I5E0	Elongator complex protein 3, putative OS=Plasmodium falciparum (isolate 3D7) OX=36329 GN=PF3D7_1227800 PE=4 SV=1	37C	1	0.978603	0.973786	0.983331	0.979722	0.96069	0.981986	0.983549	0.954453	0.990308	5	5	2	0.0171616	0.321196	-0.00896059
A0A143ZY16	Heat shock protein 40, type II OS=Plasmodium falciparum (isolate 3D7) OX=36329 GN=PF3D7_0501100.2 PE=4 SV=1	37C	1	1.0716	1.01026	1.03828	1.0354	0.977046	1.01009	0.993121	0.946122	0.918301	5	6	2	4.99591	0.673188	-0.606916
C0H4Y4	Sentrin-specific protease 2, putative OS=Plasmodium falciparum (isolate 3D7) OX=36329 GN=PF3D7_0801700 PE=3 SV=1	37C	1	1.0387	0.999439	0.976462	1.00385	1.01298	0.962524	1.00929	1.0209	0.984238	7	8	2	0.469839	0.0346757	-0.372863
C0H546	Chaperone, putative OS=Plasmodium falciparum (isolate 3D7) OX=36329 GN=PF3D7_0920100 PE=3 SV=1	37C	1	0.948005	0.997829	0.988752	1.00465	0.992633	0.982218	0.99734	0.921753	0.943745	4	6	2	23.9564	0.662275	-5.41436
C0H4D5	Uncharacterized protein OS=Plasmodium falciparum (isolate 3D7) OX=36329 GN=PF3D7_0513100 PE=4 SV=1	37C	1	0.986671	1.01985	1.03836	1.05832	0.987973	1.04063	1.02347	0.985689	1.04753	5	7	2	0.000363612	0.101258	-0.385373
Q8ILG3	Serine/threonine-protein phosphatase 2A activator OS=Plasmodium falciparum (isolate 3D7) OX=36329 GN=PF3D7_1430100 PE=3 SV=1	37C	1	1.01572	0.985599	0.984387	1.0247	1.00697	0.958228	0.970053	0.933717	0.930464	7	10	2	3.50859	0.763521	-1.1876
P46468	Putative cell division cycle ATPase OS=Plasmodium falciparum (isolate 3D7) OX=36329 GN=PF07_0047 PE=3 SV=2	37C	1	1.02334	1.05688	0.969327	1.03403	1.00801	0.994443	0.988906	0.923977	0.937448	6	12	2	15.2157	0.674193	-4.29441
Q8IBB4	Uncharacterized protein OS=Plasmodium falciparum (isolate 3D7) OX=36329 GN=PF3D7_0828300 PE=4 SV=1	37C	1	0.969961	0.959254	0.940374	0.950176	0.982366	0.972385	1.02947	0.996196	1.01996	5	15	2	4.55154	0.612565	4.51788
O97287	Uncharacterized protein OS=Plasmodium falciparum (isolate 3D7) OX=36329 GN=PF3D7_0321100 PE=4 SV=1	37C	1	0.925936	0.975292	0.950678	0.994061	0.971643	1.01026	1.07412	1.02928	1.03594	3	23	2	3.01153	0.705582	3.98409
Q8IFN0	Uncharacterized protein PFD1115c OS=Plasmodium falciparum (isolate 3D7) OX=36329 GN=PFD1115c PE=1 SV=1	37C	1	1.01723	0.997206	1.01761	1.03204	1.00652	1.01075	0.982008	0.93945	0.997338	6	6	2	8.56026	0.558212	-2.54245
Q8IDL6	Elongation factor Tu, putative OS=Plasmodium falciparum (isolate 3D7) OX=36329 GN=PF3D7_1348300 PE=4 SV=1	37C	1	0.9669	0.978623	0.949836	0.991568	0.977879	0.969369	0.971702	0.981551	0.958227	11	11	2	2615.65	0.362323	0.00370161
B9ZSI3	Uncharacterized protein OS=Plasmodium falciparum (isolate 3D7) OX=36329 GN=PF3D7_0106000 PE=4 SV=1	37C	1	0.99959	1.00522	1.00351	0.979263	0.973927	0.967106	0.975247	0.93758	0.897047	7	10	2	70.7181	0.907975	-0.526311
Q8I3R4	Zinc finger protein, putative OS=Plasmodium falciparum (isolate 3D7) OX=36329 GN=PF3D7_0519600 PE=4 SV=1	37C	1	0.994442	0.999465	0.966116	0.950414	0.97786	0.97741	0.956954	0.939012	0.936667	7	9	2	5.44623	0.713476	-0.241076
Q8IBK1	Exonuclease 1 OS=Plasmodium falciparum (isolate 3D7) OX=36329 GN=PF3D7_0725000 PE=3 SV=1	37C	1	0.964877	1.00796	0.986859	0.999519	0.978669	1.01241	0.970616	0.958132	0.933555	9	11	2	31.9288	0.655503	-1.38722
C6KTC8	Phospholipase, putative OS=Plasmodium falciparum (isolate 3D7) OX=36329 GN=PF3D7_0629300 PE=4 SV=1	37C	1	0.886335	0.950958	0.920981	0.917529	0.90176	0.91481	0.920125	0.930352	0.962329	4	5	2	37.1888	0.544154	1.24864e-05
Q8IDG7	Uncharacterized protein PF13_0277 OS=Plasmodium falciparum (isolate 3D7) OX=36329 GN=PF13_0277 PE=3 SV=1	37C	1	0.966067	0.995357	0.928606	0.946218	0.976171	0.995062	0.97169	1.0008	1.00627	9	11	2	0.97111	0.253383	3.52591
C0H4Z0	Prolyl 4-hydroxylase subunit alpha, putative OS=Plasmodium falciparum (isolate 3D7) OX=36329 GN=PF3D7_0829400 PE=4 SV=1	37C	1	0.962816	0.971726	0.952626	0.952101	0.994698	0.967069	0.997821	1.01992	1.01536	5	8	2	11.648	0.616829	3.9407
Q8IJD6	Uncharacterized protein OS=Plasmodium falciparum (isolate 3D7) OX=36329 GN=PF3D7_1026600 PE=4 SV=1	37C	1	0.943723	0.964752	0.971802	0.985663	0.968842	0.959875	0.886226	0.899271	0.943745	8	11	2	4.13438	0.684003	-5.50449
O96129	Nucleic acid binding protein, putative OS=Plasmodium falciparum (isolate 3D7) OX=36329 GN=PF3D7_0202600.1 PE=4 SV=3	37C	1	0.958744	0.941102	0.921983	0.963523	0.965499	0.962988	0.982826	0.992936	1.02182	7	8	2	14.2384	0.525276	1.00081
O96176	Patatin-like phospholipase, putative OS=Plasmodium falciparum (isolate 3D7) OX=36329 GN=PF3D7_0209100 PE=4 SV=1	37C	1	0.964669	1.00179	0.983536	0.976083	0.974222	0.986491	0.923806	0.839162	0.812139	7	7	2	18.3799	0.970769	-1.77668
C6KSW6	Leucine-rich repeat protein OS=Plasmodium falciparum (isolate 3D7) OX=36329 GN=PF3D7_0612200 PE=4 SV=1	37C	1	0.975522	0.987302	0.978687	0.994497	0.997117	0.950301	0.990064	0.966232	0.923583	6	7	2	10.5939	0.489493	-0.684772
Q8IIB5	Ribosome biogenesis regulatory protein OS=Plasmodium falciparum (isolate 3D7) OX=36329 GN=PF3D7_1124800 PE=3 SV=1	37C	1	0.961136	0.960508	0.96991	0.968527	1.00133	1.03364	1.10224	1.15891	1.1173	8	8	2	4.34153	0.949998	1.33407
Q8IKR0	Uncharacterized protein OS=Plasmodium falciparum (isolate 3D7) OX=36329 GN=PF3D7_1456900 PE=3 SV=2	37C	1	0.966497	0.957273	0.952772	0.960484	0.981384	0.972565	0.989514	1.0136	0.998224	6	8	2	11.9536	0.550721	3.4697
Q8IIW1	Syntaxin, Qa-SNARE family OS=Plasmodium falciparum (isolate 3D7) OX=36329 GN=PF3D7_1104100 PE=4 SV=2	37C	1	0.992995	1.00864	0.9773	1.02648	1.06691	1.03148	1.05366	1.09273	1.0998	4	5	2	1.9125	0.809254	0.470941
Q8III9	Uncharacterized protein OS=Plasmodium falciparum (isolate 3D7) OX=36329 GN=PF3D7_1117900 PE=4 SV=2	37C	1	0.945424	1.00936	0.94024	0.972412	0.995784	0.985144	1.00876	1.04739	1.02648	6	6	2	8.05138	0.547901	1.57745
O96279	Cytoadherence linked asexual protein 2 OS=Plasmodium falciparum (isolate 3D7) OX=36329 GN=PF3D7_0220800 PE=4 SV=2	37C	1	1.01745	0.957071	0.95035	1.01041	0.933286	0.962625	0.922967	0.881261	0.915309	5	15	2	3.72178	0.646809	-0.376254
Q8IKZ5	U3 small nucleolar RNA-associated protein 12, putative OS=Plasmodium falciparum (isolate 3D7) OX=36329 GN=PF3D7_1448000 PE=4 SV=1	37C	1	0.968329	0.944881	0.959765	0.969762	0.933098	0.981541	0.971227	0.944501	0.902811	7	7	2	1.1869	0.422198	-0.110142
Q8IJ88	Protein phosphatase inhibitor 3 OS=Plasmodium falciparum (isolate 3D7) OX=36329 GN=PF3D7_1031700 PE=4 SV=2	37C	1	0.968862	0.98644	0.9338	0.933168	0.951416	0.894922	0.920469	0.927646	0.893482	5	9	2	0.0472923	0.774749	-0.401882
Q8ILI4	WW domain-binding protein 11, putative OS=Plasmodium falciparum (isolate 3D7) OX=36329 GN=PF3D7_1428100 PE=4 SV=1	37C	1	1.00911	0.989702	0.978588	1.02656	1.02255	1.00256	1.01841	0.942476	0.918301	8	13	2	38.3838	0.82583	-3.39682
Q8IJV5	Diphthine methyl ester synthase OS=Plasmodium falciparum (isolate 3D7) OX=36329 GN=PF3D7_1009000 PE=3 SV=1	37C	1	0.980324	0.96463	0.977764	0.971536	0.972543	0.940591	0.907747	0.87769	0.739961	5	9	2	164.101	0.965632	-0.72758
Q8IIB9	U6 snRNA-associated Sm-like protein LSm1 OS=Plasmodium falciparum (isolate 3D7) OX=36329 GN=LSM1 PE=3 SV=2	37C	1	0.991785	0.986141	1.01353	1.0042	0.988356	0.962404	1.01972	0.9726	1.00089	3	7	2		0.00293827	-1.51706e-05
Q8IE85	60S ribosomal protein L6, putative OS=Plasmodium falciparum (isolate 3D7) OX=36329 GN=PF3D7_1323100 PE=1 SV=1	37C	1	1.15206	1.11585	1.21932	1.14416	1.07829	1.14119	1.10705	1.09716	1.16477	6	9	2	386.309	0.537731	-0.000116881
Q8II36	Aquaglyceroporin OS=Plasmodium falciparum (isolate 3D7) OX=36329 GN=PF3D7_1132800 PE=3 SV=1	37C	1	1.21469	1.12899	1.22032	1.16276	1.02719	1.10225	0.958498	0.941363	0.848302	1	7	2	11.0172	0.688121	-0.780274
Q8ILC3	CCR4-associated factor 16, putative OS=Plasmodium falciparum (isolate 3D7) OX=36329 GN=PF3D7_1434000 PE=4 SV=2	37C	1	1.00623	0.971734	0.993181	0.978782	0.991929	1.01613	0.993599	0.983699	1.00717	5	10	2	1.04656	0.12937	2.82901
Q8I383	Zinc finger protein, putative OS=Plasmodium falciparum (isolate 3D7) OX=36329 GN=PF3D7_0906600 PE=4 SV=1	37C	1	1.00567	0.991159	0.993872	0.975947	0.997911	0.969202	0.939135	0.886447	0.827688	7	11	2	69.2877	0.982573	-0.701513
Q8IM39	COBW domain-containing protein 1, putative OS=Plasmodium falciparum (isolate 3D7) OX=36329 GN=PF3D7_1405500 PE=4 SV=1	37C	1	1.06698	1.03853	1.00564	1.03171	0.980998	1.01105	0.972254	0.983873	0.909385	7	8	2	7.20813	0.63873	-0.533661
Q8IBK6	Protein kinase, putative OS=Plasmodium falciparum (isolate 3D7) OX=36329 GN=PF3D7_0724600 PE=4 SV=1	37C	1	0.968047	0.97384	0.938188	0.971363	0.978854	0.982754	1.008	1.02277	1.03978	9	10	2	10.3122	0.745235	1.03987
Q8I451	Trafficking protein particle complex subunit 8, putative OS=Plasmodium falciparum (isolate 3D7) OX=36329 GN=PF3D7_0505100 PE=4 SV=1	37C	1	1.0096	1.05364	1.03682	1.05128	1.04141	1.06582	0.9789	1.0073	0.949324	8	8	2	7.98637	0.571466	-3.86474
Q8I239	Phosphatidylinositol-4-phosphate 5-kinase OS=Plasmodium falciparum (isolate 3D7) OX=36329 GN=PF3D7_0110600 PE=4 SV=1	37C	1	1.01315	1.00592	1.02935	1.04868	1.02993	1.03199	0.95438	0.988393	0.935887	5	5	2	6.55594	0.719234	-4.67226
Q8I3T5	Serine/arginine-rich splicing factor 1 OS=Plasmodium falciparum (isolate 3D7) OX=36329 GN=PF3D7_0517300 PE=1 SV=2	37C	1	1.02974	1.00285	1.02503	1.02474	1.01459	1.03526	1.08056	1.10173	1.07973	7	9	2	4.9527	0.907936	2.24088
Q8I545	Ubiquitin-like modifier HUB1, putative OS=Plasmodium falciparum (isolate 3D7) OX=36329 GN=PF3D7_1237800 PE=4 SV=1	37C	1	0.964028	0.979165	1.01231	1.00492	1.00901	0.971885	1.01722	0.99334	0.993811	5	8	2	0.0213854	0.271746	6.41531
Q8ILW0	FeS assembly ATPase SufC OS=Plasmodium falciparum (isolate 3D7) OX=36329 GN=PF3D7_1413500 PE=4 SV=1	37C	1	0.984464	1.01628	0.999762	0.999431	0.99064	1.03504	0.996705	1.0167	0.977391	4	5	2	0.00806104	0.0189018	-0.674725
C0H5A4	U1 small nuclear ribonucleoprotein A, putative OS=Plasmodium falciparum (isolate 3D7) OX=36329 GN=PF3D7_1306900 PE=4 SV=1	37C	1	1.00704	1.01126	0.979142	0.988161	1.00588	0.985496	0.980848	0.985843	0.947723	5	6	2	25.998	0.603724	-0.67191
O96161	Iron-sulfur assembly protein, putative OS=Plasmodium falciparum (isolate 3D7) OX=36329 GN=PF3D7_0207200 PE=4 SV=1	37C	1	0.963716	0.968002	0.943093	1.02129	0.994719	1.00672	1.06999	1.02917	0.968131	4	4	2	0.106453	0.402791	7.79524
Q8ILG9	Diphthamide biosynthesis protein 2, putative OS=Plasmodium falciparum (isolate 3D7) OX=36329 GN=PF3D7_1429500 PE=3 SV=1	37C	1	1.01514	1.04109	0.979405	1.01095	0.991606	0.957643	0.985204	0.870651	0.881569	6	9	2	19.1877	0.844059	-5.09335
C6KT72	Branchpoint-bridging protein OS=Plasmodium falciparum (isolate 3D7) OX=36329 GN=PF3D7_0623600 PE=3 SV=1	37C	1	0.993903	1.00857	1.02055	1.02646	1.04069	1.02707	1.03154	0.954595	0.989437	6	7	2	24.2106	0.529892	-3.13742
C6KT10	Uncharacterized protein OS=Plasmodium falciparum (isolate 3D7) OX=36329 GN=PF3D7_0616900 PE=4 SV=1	37C	1	0.940158	0.922134	0.920294	0.961338	0.943175	0.953415	0.960037	0.954012	0.999111	4	5	2	100.237	0.320286	3.53463
O97320	Histone H2A OS=Plasmodium falciparum (isolate 3D7) OX=36329 GN=PF3D7_0320900 PE=3 SV=1	37C	1	0.993072	1.06548	1.06552	0.994144	1.04139	1.04732	1.10075	1.0987	1.1388	2	12	2	8.05072	0.698565	0.932778
Q8IIX5	PRESAN domain-containing protein OS=Plasmodium falciparum (isolate 3D7) OX=36329 GN=PF3D7_1102500 PE=4 SV=1	37C	1	1.06159	1.04618	1.08814	1.06452	1.03025	1.0449	1.06723	1.06075	1.17696	7	8	2	1.17911	0.403188	0.144974
C0H4K1	Centrin, putative OS=Plasmodium falciparum (isolate 3D7) OX=36329 GN=PF3D7_0702900 PE=4 SV=1	37C	1	0.991373	0.9683	1.00718	0.996445	1.03178	1.02134	1.02959	1.07052	1.16598	3	6	2	45.4778	0.892166	1.1548
Q8I3Y3	CDK-activating kinase assembly factor MAT1 OS=Plasmodium falciparum (isolate 3D7) OX=36329 GN=PF3D7_0512300 PE=4 SV=1	37C	1	0.965576	0.953272	0.985782	0.990226	0.980155	0.951001	0.92205	0.907083	0.894193	5	7	2	5.28234	0.868783	-1.34231
A0A5K1K8V8	60S ribosomal protein L6, putative OS=Plasmodium falciparum (isolate 3D7) OX=36329 GN=PF3D7_1338200 PE=3 SV=1	37C	1	1.04832	1.06576	1.09924	1.09775	1.02547	1.03771	1.00042	0.982749	0.977391	4	11	2	5.0509	0.568987	-1.18768
Q8I350	Uncharacterized protein OS=Plasmodium falciparum (isolate 3D7) OX=36329 GN=PF3D7_0910200 PE=4 SV=1	37C	1	1.02886	0.990085	0.985599	1.0109	0.970399	1.02545	1.00708	1.01049	1.09232	7	8	2	89.3702	0.720565	3.59139
Q8IKM6	Inner membrane complex sub-compartment protein 3 OS=Plasmodium falciparum (isolate 3D7) OX=36329 GN=PF3D7_1460600 PE=4 SV=1	37C	1	1.08363	1.05969	1.06656	1.08605	1.02935	1.06912	0.976351	0.964551	0.911598	4	6	2	10.313	0.77071	-3.47398
Q8I559	Uncharacterized protein OS=Plasmodium falciparum (isolate 3D7) OX=36329 GN=PF3D7_1236400 PE=4 SV=2	37C	1	1.00523	1.0351	1.01072	1.0417	0.981451	1.05577	1.0528	1.04826	1.01353	8	8	2	0.0315359	0.211329	0.341905
Q8IDP4	Thioredoxin 2 OS=Plasmodium falciparum (isolate 3D7) OX=36329 GN=trx2 PE=1 SV=1	37C	1	1.13877	1.17576	1.12516	1.18364	1.19522	1.10185	1.21805	1.25527	1.21251	4	5	2	0.00731307	0.735845	0.10788
Q8I0V5	Acyl carrier protein, mitochondrial, putative OS=Plasmodium falciparum (isolate 3D7) OX=36329 GN=PF3D7_1208300 PE=3 SV=1	37C	1	0.978893	1.02154	0.987382	1.01071	0.993287	0.986753	0.997206	1.04538	0.983377	4	20	2	18.6949	0.125867	4.77056
Q8IEK9	RNA-binding protein, putative OS=Plasmodium falciparum (isolate 3D7) OX=36329 GN=PF3D7_1310700 PE=4 SV=1	37C	1	0.981133	0.996084	0.992259	1.01004	1.00946	0.994509	1.05266	1.03729	1.09659	3	8	2	24.3513	0.83057	0.727433
C0H4X5	Anamorsin homolog OS=Plasmodium falciparum (isolate 3D7) OX=36329 GN=MAL8P1.31 PE=3 SV=1	37C	1	1.00289	1.00762	0.999035	0.97747	0.987697	0.924541	0.899704	0.866743	0.81686	6	11	2	19.7826	0.978854	-0.527354
Q8IJR3	Uncharacterized protein OS=Plasmodium falciparum (isolate 3D7) OX=36329 GN=PF3D7_1013200 PE=4 SV=1	37C	1	0.956529	0.980274	1.00424	0.964246	0.969346	1.05035	0.981258	1.05411	0.984238	9	9	2	1.47529	0.342251	7.08248
Q8IBM3	tRNA(His) guanylyltransferase OS=Plasmodium falciparum (isolate 3D7) OX=36329 GN=PF3D7_0723000 PE=3 SV=1	37C	1	0.969995	0.98807	1.01912	0.988255	1.00055	0.979502	0.981049	0.98914	0.965636	8	9	2	2.00101	0.259457	-4.95707
O96224	Uncharacterized protein OS=Plasmodium falciparum (isolate 3D7) OX=36329 GN=PF3D7_0214400 PE=3 SV=2	37C	1	0.991609	0.983861	1.04053	1.03781	0.999663	0.959973	1.05933	0.990663	1.04074	5	7	2	0.383781	0.059187	0.245677
A0A5K1K976	Uncharacterized protein OS=Plasmodium falciparum (isolate 3D7) OX=36329 GN=PF3D7_1345800 PE=4 SV=1	37C	1	0.985104	0.99048	0.986847	1.0177	0.972411	1.03512	1.02876	1.07438	1.06641	6	9	2	6.49308	0.803934	1.05587
Q8IAS0	Plasmepsin X OS=Plasmodium falciparum (isolate 3D7) OX=36329 GN=PMX PE=1 SV=1	37C	1	0.973256	0.979974	0.929744	0.928402	0.958574	0.947088	1.03325	1.08458	1.11841	9	10	2	13.6579	0.872269	2.08639
Q8ILP7	DNL-type zinc finger protein OS=Plasmodium falciparum (isolate 3D7) OX=36329 GN=PF3D7_1420300 PE=4 SV=1	37C	1	1.03149	1.01519	0.998154	1.05084	1.05024	0.989588	1.01517	1.02819	0.979094	3	6	2	1.82047	0.175613	-3.47234
Q8IEM4	Uncharacterized protein OS=Plasmodium falciparum (isolate 3D7) OX=36329 GN=PF3D7_1309000 PE=4 SV=1	37C	1	0.980223	0.979249	0.980775	0.944135	0.954979	0.90709	0.90848	0.880188	0.875389	6	7	2	2.276	0.956107	-0.388509
C6KT27	Trafficking protein particle complex subunit 6A, putative OS=Plasmodium falciparum (isolate 3D7) OX=36329 GN=PF3D7_0618700 PE=3 SV=1	37C	1	1.02782	0.997127	1.00492	1.03633	1.02986	1.00964	1.03942	1.06074	1.08494	5	9	2	14.2994	0.756235	1.45428
Q8IHW3	Uncharacterized protein OS=Plasmodium falciparum (isolate 3D7) OX=36329 GN=PF3D7_1140200 PE=4 SV=2	37C	1	1.00495	0.9697	1.00721	0.991312	1.04075	0.961437	1.00941	0.991696	1.03214	5	8	2	1.65359	0.0492442	0.3046
Q8I4R8	Uncharacterized protein OS=Plasmodium falciparum (isolate 3D7) OX=36329 GN=PF3D7_1251600 PE=4 SV=1	37C	1	0.90849	0.959328	0.927091	0.9547	0.950355	0.919255	0.945316	0.960501	0.930464	7	7	2	72.2171	0.538155	0.000214555
Q8IBM8	Pre-mRNA-splicing factor CWC15, putative OS=Plasmodium falciparum (isolate 3D7) OX=36329 GN=PF3D7_0722500 PE=3 SV=1	37C	1	0.964433	1.01454	0.97906	0.945923	0.992238	0.97274	1.04649	1.03326	1.09232	7	8	2	8.82224	0.71278	3.68256
Q8IKL9	40S ribosomal protein S28e, putative OS=Plasmodium falciparum (isolate 3D7) OX=36329 GN=PF3D7_1461300 PE=1 SV=1	37C	1	0.985344	1.10943	1.02049	1.03383	1.16853	1.1019	1.28578	1.28104	1.41206	3	7	2	12.8678	0.883414	0.48472
Q8IKM5	60S ribosomal protein L27 OS=Plasmodium falciparum (isolate 3D7) OX=36329 GN=PF3D7_1460700 PE=1 SV=2	37C	1	1.09457	1.10829	1.1433	1.1442	1.10074	1.1245	1.1664	1.20766	1.30546	6	11	2	0.85252	0.768368	0.178663
Q8I2S9	Pre-mRNA-splicing factor 18 OS=Plasmodium falciparum (isolate 3D7) OX=36329 GN=PF3D7_0922700 PE=3 SV=1	37C	1	1.00388	1.02633	1.04373	1.01071	1.02662	1.02436	1.01868	0.973151	0.983377	5	5	2	11.7181	0.54187	-2.13015
Q8IKA2	Uncharacterized protein OS=Plasmodium falciparum (isolate 3D7) OX=36329 GN=PF3D7_1473500 PE=4 SV=1	37C	1	0.922295	0.964009	0.911813	0.912789	0.956609	0.923836	0.93587	0.946918	0.904264	3	5	2		0.14302	0.000177779
O97232	1-cys-glutaredoxin-like protein-1 OS=Plasmodium falciparum (isolate 3D7) OX=36329 GN=PF3D7_0304500 PE=4 SV=1	37C	1	0.992609	0.979676	0.963651	0.992767	1.03893	1.03219	1.20893	1.35754	1.36906	5	20	2	10.6367	0.98716	1.63041
C0H5C2	40S ribosomal protein S19 OS=Plasmodium falciparum (isolate 3D7) OX=36329 GN=PF3D7_1317800 PE=1 SV=1	37C	1	1.10238	1.12606	1.17549	1.13398	1.07019	1.09134	1.12806	1.07404	1.16477	2	6	2	7.43594e+06	0.532646	-4.43605e-05
B9ZSJ1	Uncharacterized protein OS=Plasmodium falciparum (isolate 3D7) OX=36329 GN=PF3D7_0113200 PE=4 SV=1	37C	1	1.03454	1.01894	1.04901	1.04299	1.01025	1.01797	1.01091	0.979943	1.00537	7	12	2	4.60466	0.41891	-1.1385
Q8IM27	Vacuolar protein sorting-associated protein 29 OS=Plasmodium falciparum (isolate 3D7) OX=36329 GN=PF3D7_1406700 PE=3 SV=1	37C	1	1.01706	0.980861	1.023	1.00676	0.979113	0.964281	0.906171	0.865461	0.792666	4	6	2	49.4128	0.970469	-0.61117
A0A143ZVB6	Uncharacterized protein OS=Plasmodium falciparum (isolate 3D7) OX=36329 GN=PF3D7_0903600.1 PE=4 SV=1	37C	1	1.04825	0.990168	0.968933	1.01359	0.987119	1.12411	0.93182	1.15636	0.891356	7	7	2	0.0861016	0.00232986	-7.61009e-05
Q8IER7	Probable DNA-directed RNA polymerase II subunit RPB11 OS=Plasmodium falciparum (isolate 3D7) OX=36329 GN=PF13_0023 PE=3 SV=1	37C	1	1.03908	1.06226	1.07029	1.03707	1.02839	1.02808	0.967883	0.923852	0.843844	5	9	2	31.09	0.919245	-0.95972
C0H5A0	Translational activator GCN1, putative OS=Plasmodium falciparum (isolate 3D7) OX=36329 GN=PF3D7_1305300 PE=3 SV=1	37C	1	1.0184	0.92226	0.911173	1.00548	0.883255	0.987107	0.909126	0.984107	0.849584	10	10	2	17.8467	0.235711	-0.16628
Q8ILY2	DnaJ protein, putative OS=Plasmodium falciparum (isolate 3D7) OX=36329 GN=PF3D7_1411300 PE=4 SV=2	37C	1	0.993907	1.00652	1.02703	1.00559	1.00109	1.00947	1.01859	0.976328	1.02461	8	12	2	11.5281	0.024466	-0.0560099
Q8II47	Oxysterol-binding protein, putative OS=Plasmodium falciparum (isolate 3D7) OX=36329 GN=PF3D7_1131800 PE=4 SV=1	37C	1	0.905547	1.008	0.93279	0.856553	0.91059	0.922748	0.918193	0.787096	0.813314	5	5	2	28.207	0.601642	-0.216417
Q8I5P3	Uncharacterized protein OS=Plasmodium falciparum (isolate 3D7) OX=36329 GN=PF3D7_1216400 PE=4 SV=2	37C	1	0.937872	0.961481	0.935417	0.939609	0.928743	0.891563	0.666976	0.534436	0.383225	3	5	2	18.189	0.985949	-0.940602
Q8IM12	FANCJ-like helicase, putative OS=Plasmodium falciparum (isolate 3D7) OX=36329 GN=PF3D7_1408400 PE=4 SV=1	37C	1	1.01376	1.00256	1.01957	0.99709	1.00863	1.0245	1.11036	1.13707	1.13535	10	13	2	6.91945	0.987628	2.32507
Q8II90	tRNA (guanine-N(7)-)-methyltransferase OS=Plasmodium falciparum (isolate 3D7) OX=36329 GN=PF3D7_1127300 PE=3 SV=1	37C	1	1.05201	1.00177	1.01371	1.00655	0.987287	0.976262	0.90838	0.870073	0.785465	4	6	2	66.3549	0.962566	-0.570406
A0A143ZVC5	Zinc finger protein, putative OS=Plasmodium falciparum (isolate 3D7) OX=36329 GN=PF3D7_0930400.2 PE=4 SV=1	37C	1	0.916085	0.999696	0.960386	0.960519	0.899145	0.968409	1.07954	0.903458	1.07973	4	6	2	4.04249	0.223029	4.58093
Q8I3R0	40S ribosomal protein S9, putative OS=Plasmodium falciparum (isolate 3D7) OX=36329 GN=PF3D7_0520000 PE=1 SV=1	37C	1	1.12565	1.12394	1.17314	1.15577	1.05094	1.09609	1.04232	1.06566	1.04949	7	15	2	0.603241	0.224519	-1.82541
C6KSW1	Basal complex transmembrane protein 1 OS=Plasmodium falciparum (isolate 3D7) OX=36329 GN=PF3D7_0611600 PE=4 SV=1	37C	1	0.954077	0.992344	0.992348	1.00223	1.00589	0.994197	1.01309	0.996271	1.0369	7	8	2	5.71534	0.423498	0.401119
Q8I288	Cyclase-associated protein OS=Plasmodium falciparum (isolate 3D7) OX=36329 GN=PF3D7_0105300 PE=3 SV=1	37C	1	1.01022	0.957753	1.02129	0.949107	1.00245	0.971139	0.986776	1.00255	0.974003	2	8	2	1.28094	0.0444712	-0.0918722
Q8I3M0	Uncharacterized protein OS=Plasmodium falciparum (isolate 3D7) OX=36329 GN=PF3D7_0524500 PE=4 SV=1	37C	1	0.972646	0.981332	0.967197	0.988348	0.971917	0.941982	0.934647	0.941916	0.983377	4	7	2	0.0452883	0.422581	-0.373434
C0H5E9	DnaJ protein, putative OS=Plasmodium falciparum (isolate 3D7) OX=36329 GN=PF3D7_1330300 PE=4 SV=2	37C	1	1.0099	1.0023	1.01118	1.04035	1.01812	0.991425	1.03764	0.920069	1.00537	5	7	2	23.2911	0.351406	-3.19081
Q8IB40	Protein transport protein YIF1, putative OS=Plasmodium falciparum (isolate 3D7) OX=36329 GN=PF3D7_0820500 PE=3 SV=1	37C	1	0.967923	0.992534	0.949774	0.983187	1.02101	0.978433	1.04696	1.07549	1.124	5	8	2	35.6962	0.865236	0.777749
C6KT59	Radical SAM protein, putative OS=Plasmodium falciparum (isolate 3D7) OX=36329 GN=PF3D7_0622200 PE=4 SV=1	37C	1	0.996814	0.967677	0.997387	0.99933	0.973226	0.949046	0.912031	0.896714	0.878812	8	9	2	5.16717	0.952426	-0.955591
C0H4K4	Basal complex transmembrane protein 2 OS=Plasmodium falciparum (isolate 3D7) OX=36329 GN=PF3D7_0704100 PE=4 SV=1	37C	1	1.01731	1.00209	0.995199	1.01362	0.982087	0.999705	0.985563	1.00438	0.966466	7	10	2	11.2472	0.370505	-0.402919
Q8IEJ2	Uncharacterized protein OS=Plasmodium falciparum (isolate 3D7) OX=36329 GN=PF3D7_1301400 PE=4 SV=1	37C	1	1.04442	1.00092	1.01429	1.01552	1.0196	0.905199	0.976164	0.971862	0.999111	4	5	2	1.20947	0.481974	-3.20745
Q8IIS2	IWS1-like protein, putative OS=Plasmodium falciparum (isolate 3D7) OX=36329 GN=PF3D7_1108000 PE=4 SV=1	37C	1	0.900329	0.969952	0.942083	0.985868	0.945958	0.962058	0.977975	0.96048	1.02182	3	6	2	9.12842	0.205665	0.793593
C6KT18	Histone H2A OS=Plasmodium falciparum (isolate 3D7) OX=36329 GN=PF3D7_0617800 PE=3 SV=1	37C	1	0.96926	1.04964	1.01334	1.00761	0.982248	1.01893	0.998106	0.990926	0.997338	5	24	2	6.87669e+27	0.00184725	0.000923275
C6KT23	60S ribosomal protein L27a, putative OS=Plasmodium falciparum (isolate 3D7) OX=36329 GN=PF3D7_0618300 PE=1 SV=1	37C	1	1.12925	1.12114	1.21539	1.14125	1.08442	1.10992	1.05173	1.11465	1.02089	6	8	2	15.9846	0.163615	-0.786231
Q8IM01	Uncharacterized protein OS=Plasmodium falciparum (isolate 3D7) OX=36329 GN=PF3D7_1409400 PE=4 SV=2	37C	1	1.1954	1.12398	1.1438	1.16983	1.02673	1.07898	0.971365	0.968165	0.952542	4	5	2	3.34181	0.596653	-1.0081
Q8IBJ3	DNA mismatch repair protein PMS1, putative OS=Plasmodium falciparum (isolate 3D7) OX=36329 GN=PF3D7_0726300 PE=3 SV=1	37C	1	0.973621	0.989943	0.931623	0.99926	0.973496	0.943522	0.97224	0.955555	1.02089	3	5	2	1.19662	4.81953e-07	0.448742
Q8IBJ9	Mago nashi protein homologue, putative OS=Plasmodium falciparum (isolate 3D7) OX=36329 GN=PF3D7_0725200 PE=3 SV=2	37C	1	0.974919	0.988914	0.972111	1.00844	0.990376	0.981574	0.956743	0.984931	0.902087	6	15	2	106.267	0.762407	-6.88694
Q8IAM1	AP2 domain transcription factor, putative OS=Plasmodium falciparum (isolate 3D7) OX=36329 GN=PF3D7_0802100 PE=4 SV=1	37C	1	1.03899	1.00439	1.02594	1.00889	1.06827	1.04544	1.05627	1.05732	1.04949	8	8	2	0.358613	0.700167	2.87674
Q8IKS1	Uncharacterized protein OS=Plasmodium falciparum (isolate 3D7) OX=36329 GN=PF3D7_1455700 PE=4 SV=1	37C	1	0.996257	0.974033	1	0.986991	0.968727	0.941081	0.894594	0.863513	0.869969	8	10	2	4.27534	0.977179	-1.05448
Q8I398	Nucleoporin NUP221, putative OS=Plasmodium falciparum (isolate 3D7) OX=36329 GN=PF3D7_0905100 PE=4 SV=1	37C	1	0.960911	0.97906	0.969518	0.998112	0.981681	1.00987	0.985218	1.02357	1.06641	3	4	2	53.1571	0.77746	2.78025
Q8ILE3	Voltage-dependent anion-selective channel protein, putative OS=Plasmodium falciparum (isolate 3D7) OX=36329 GN=PF3D7_1432100 PE=4 SV=1	37C	1	1.21656	1.07808	1.16979	1.19094	1.00602	1.10599	0.976238	1.0226	1.04171	5	10	2	0.418512	0.373318	-6.04519
Q8I444	Small ubiquitin-related modifier OS=Plasmodium falciparum (isolate 3D7) OX=36329 GN=PF3D7_0505800 PE=4 SV=1	37C	1	0.965718	0.990992	0.976289	0.969669	0.997644	0.975623	1.02028	1.01238	1.03025	5	24	2	7.86267	0.707454	7.16153
Q8IM42	Trafficking protein particle complex subunit OS=Plasmodium falciparum (isolate 3D7) OX=36329 GN=PF3D7_1405200 PE=3 SV=1	37C	1	1.00633	0.988653	0.987719	1.00248	1.01232	0.990528	0.949956	0.930883	0.882261	5	9	2	38.942	0.944376	-0.900744
Q8I414	Uncharacterized protein OS=Plasmodium falciparum (isolate 3D7) OX=36329 GN=PF3D7_0508900 PE=4 SV=1	37C	1	0.954535	0.974297	0.948802	0.974049	0.994299	0.977809	0.993838	1.01405	1.04461	9	10	2	18.1162	0.690954	0.889016
Q8IJ54	Merozoite surface protein 6 OS=Plasmodium falciparum (isolate 3D7) OX=36329 GN=PF3D7_1035500 PE=4 SV=1	37C	1	1.04371	1.04225	1.06677	1.06528	1.00361	1.03241	1.00817	1.07558	1.09126	4	4	2	0.16983	0.256753	0.0692902
Q8IK02	40S ribosomal protein S20e, putative OS=Plasmodium falciparum (isolate 3D7) OX=36329 GN=PF3D7_1003500 PE=1 SV=1	37C	1	1.0096	1.06175	1.06076	1.00379	0.998846	0.995786	0.933019	0.809399	0.759973	5	9	2	21.9442	0.952185	-1.15792
Q8IJ65	Uncharacterized protein OS=Plasmodium falciparum (isolate 3D7) OX=36329 GN=PF3D7_1034500 PE=4 SV=2	37C	1	1.01804	1.06278	1.03278	1.05629	0.998839	1.052	1.01169	1.01508	1.04461	6	9	2	1.4592	0.186902	-0.000204924
A0A144A3Q5	Vacuolar protein sorting-associated protein 60, putative OS=Plasmodium falciparum (isolate 3D7) OX=36329 GN=PF3D7_1441800 PE=4 SV=1	37C	1	0.893223	1.01825	0.906187	0.97379	0.938847	0.978117	0.930006	0.998374	0.976542	5	7	2	27.4226	0.10642	7.85208
A0A5K1K954	Uncharacterized protein OS=Plasmodium falciparum (isolate 3D7) OX=36329 GN=PF3D7_1363600 PE=4 SV=1	37C	1	1.05596	1.03688	1.02242	1.01989	1.04902	1.02656	1.07154	1.1393	1.13421	6	9	2	11.9223	0.880089	2.65894
Q8ILP8	Myosin-specific chaperone UNC, putative OS=Plasmodium falciparum (isolate 3D7) OX=36329 GN=PF3D7_1420200 PE=4 SV=1	37C	1	1.05995	1.04962	1.07984	1.01467	1.0232	1.04559	0.979224	0.957555	0.89992	7	8	2	22.974	0.794229	-1.02814
Q8IKX8	Exosome complex exonuclease RRP6 OS=Plasmodium falciparum (isolate 3D7) OX=36329 GN=PF3D7_1449700 PE=4 SV=1	37C	1	1.02262	1.03095	1.02961	1.00389	1.00619	1.01718	0.979235	0.957117	0.985965	9	10	2	7.79261	0.725948	-3.07774
Q8I5P2	Male development gene 1 OS=Plasmodium falciparum (isolate 3D7) OX=36329 GN=PF3D7_1216500 PE=4 SV=1	37C	1	0.981669	0.98549	0.999185	1.01823	1.01737	1.0129	0.998155	0.912621	1.05441	6	7	2	0.0303771	0.0273585	2.08885
Q8IEF9	Uncharacterized protein OS=Plasmodium falciparum (isolate 3D7) OX=36329 GN=PF3D7_1315500 PE=4 SV=1	37C	1	1.10254	1.09559	1.13958	1.09628	1.0642	1.07872	1.21003	1.14447	1.31925	4	7	2	2.78792	0.572568	0.219102
Q8IFN2	Apical asparagine-rich protein AARP OS=Plasmodium falciparum (isolate 3D7) OX=36329 GN=PF3D7_0423400 PE=4 SV=1	37C	1	0.996694	0.998696	1.02887	1.0056	1.01694	1.03513	1.09055	1.07646	1.06743	4	8	2	3.48544	0.901681	3.88292
A0A144A0U1	Leucine-rich repeat protein OS=Plasmodium falciparum (isolate 3D7) OX=36329 GN=PF3D7_1249600 PE=4 SV=1	37C	1	0.988955	0.990876	1.00268	1.00642	1.01003	0.980281	0.94385	0.93301	0.948523	7	7	2	3.77683	0.933239	-3.70564
Q8IAZ9	Vacuolar protein sorting-associated protein 2, putative OS=Plasmodium falciparum (isolate 3D7) OX=36329 GN=PF3D7_0816200 PE=4 SV=1	37C	1	0.955166	1.04687	1.0805	1.07734	1.04698	1.0637	1.10274	1.09654	1.13306	6	8	2	0.322474	0.675882	0.312942
Q8IFQ7	Ribosome-recycling factor OS=Plasmodium falciparum (isolate 3D7) OX=36329 GN=PF3D7_0420400 PE=3 SV=1	37C	1	0.963228	1.00631	0.966244	0.973094	1.00797	0.97006	0.994199	0.956279	0.961506	4	5	2	0.611145	0.174632	-0.112773
Q8IBT8	PDCD2 domain-containing protein, putative OS=Plasmodium falciparum (isolate 3D7) OX=36329 GN=PF3D7_0716200 PE=4 SV=1	37C	1	0.92799	0.964536	0.93931	0.935459	0.933004	0.943263	0.874807	0.831715	0.779473	7	9	2	20.0078	0.897667	-0.932599
Q8IKG5	WD repeat-containing protein 79, putative OS=Plasmodium falciparum (isolate 3D7) OX=36329 GN=PF3D7_1467200 PE=4 SV=1	37C	1	0.998827	0.986268	1.00417	0.982404	0.991048	0.94035	0.937229	0.9309	0.894904	6	6	2	9.76544	0.917552	-0.528582
B9ZSJ0	Eukaryotic translation initiation factor 4E, putative OS=Plasmodium falciparum (isolate 3D7) OX=36329 GN=PF3D7_0111800 PE=3 SV=2	37C	1	0.980374	0.959403	0.992801	0.99929	0.977888	0.986409	0.989032	0.973316	0.968966	7	11	2	3.93196	0.215844	0.0308345
C6KTC1	DNA methyltransferase 1-associated protein 1, putative OS=Plasmodium falciparum (isolate 3D7) OX=36329 GN=PF3D7_0628600 PE=4 SV=1	37C	1	1.01074	1.0055	1.00032	0.999144	0.986737	1.01701	1.00565	0.97683	1.01353	5	5	2	34.7421	0.00607092	-0.158466
Q8I583	Sentrin-specific protease 1 OS=Plasmodium falciparum (isolate 3D7) OX=36329 GN=PF3D7_1233900 PE=3 SV=2	37C	1	0.971227	0.957108	0.956527	0.979273	1.00329	0.99597	1.05768	1.05349	1.11841	9	9	2	48.5155	0.889624	0.561641
Q8I472	Tim10/DDP family zinc finger protein, putative OS=Plasmodium falciparum (isolate 3D7) OX=36329 GN=PF3D7_0502900 PE=4 SV=1	37C	1	0.976095	0.990195	0.989085	0.969329	0.99426	0.928981	0.871688	0.764214	0.792107	4	12	2	8.91706	0.966568	-1.3524
A0A5K1K8N6	Uncharacterized protein OS=Plasmodium falciparum (isolate 3D7) OX=36329 GN=PF3D7_1357400 PE=4 SV=1	37C	1	1.04164	0.976919	1.015	1.06512	0.996968	1.01893	0.992491	1.0306	0.996454	5	5	2	1911.44	0.0316812	1.65143e-05
C0H529	Small nuclear ribonucleoprotein Sm D3 OS=Plasmodium falciparum (isolate 3D7) OX=36329 GN=PF3D7_0909800 PE=3 SV=1	37C	1	0.987677	1.02061	0.998585	1.02131	1.05082	1.03078	1.0803	1.09175	1.14694	4	6	2	8.80461	0.903811	0.504196
C0H4M1	AAA family ATPase, putative OS=Plasmodium falciparum (isolate 3D7) OX=36329 GN=PF3D7_0707400 PE=4 SV=1	37C	1	1.01508	0.965072	0.980536	0.980377	1.0031	0.993249	1.03369	1.04659	1.07048	5	5	2	11.4912	0.808275	1.2209
Q8ILS5	HRDC domain-containing protein OS=Plasmodium falciparum (isolate 3D7) OX=36329 GN=PF3D7_1417100 PE=4 SV=1	37C	1	0.795134	0.943072	0.788941	0.806896	0.792854	0.80296	0.812339	0.774082	0.796598	6	11	2		0.0560708	0.000285726
Q8IIN8	RNA transcription, translation and transport factor protein, putative OS=Plasmodium falciparum (isolate 3D7) OX=36329 GN=PF3D7_1112500 PE=4 SV=1	37C	1	1.0287	1.00732	1.00777	0.999027	1.02112	1.03886	1.09131	1.1588	1.2073	6	9	2	19.751	0.986241	0.988977
Q8I3U5	tRNA pseudouridine synthase, putative OS=Plasmodium falciparum (isolate 3D7) OX=36329 GN=PF3D7_0516300 PE=3 SV=1	37C	1	1.02474	1.02327	1.01828	1.03406	1.05977	1.06679	1.03712	1.06318	1.05738	5	7	2	0.0388763	0.770216	0.436404
Q8I2N9	HSP90 co-chaperone p23 OS=Plasmodium falciparum (isolate 3D7) OX=36329 GN=PF3D7_0927000 PE=4 SV=1	37C	1	1.03432	0.999818	1.05786	0.984053	1.01492	1.00723	1.05877	0.959368	0.990308	4	7	2	30.5938	0.301521	-3.28404
Q8IFM8	Cysteine-rich protective antigen OS=Plasmodium falciparum (isolate 3D7) OX=36329 GN=CyRPA PE=1 SV=1	37C	1	1.06458	0.99129	1.02878	1.00511	1.02787	1.04037	0.962362	1.00511	0.928159	8	9	2	7.16974	0.495827	-5.09078
Q8IHZ5	Subtilisin-like protease 2 OS=Plasmodium falciparum (isolate 3D7) OX=36329 GN=SUB2 PE=1 SV=1	37C	1	0.973487	0.988124	0.988911	1.02018	0.987687	1.04171	1.05561	1.05711	1.11287	7	9	2	8.74018	0.865805	0.583934
O96278	Uncharacterized protein OS=Plasmodium falciparum (isolate 3D7) OX=36329 GN=PF3D7_0220600 PE=4 SV=2	37C	1	1.08308	1.05366	1.00709	1.07963	1.00124	1.05563	0.991004	1.05722	1.07048	5	7	2	2.49024	0.151313	-0.000262098
O97250	60S ribosomal protein L7, putative OS=Plasmodium falciparum (isolate 3D7) OX=36329 GN=PF3D7_0307200 PE=1 SV=2	37C	1	1.10872	1.04451	1.13817	1.12322	1.06306	1.06295	1.07146	1.12449	1.11177	4	6	2	5.80524e+07	0.469871	-0.0135213
Q8IKV1	Syntaxin-6, putative OS=Plasmodium falciparum (isolate 3D7) OX=36329 GN=PF3D7_1452500 PE=4 SV=2	37C	1	1.08007	0.973497	1.00767	1.04852	0.991707	1.02456	1.07524	1.12881	1.20472	3	4	2	35.0438	0.818984	1.12324
A0A144A0M5	Pre-mRNA-splicing factor RBM22, putative OS=Plasmodium falciparum (isolate 3D7) OX=36329 GN=PF3D7_1248200 PE=4 SV=1	37C	1	1.04478	1.08598	1.10031	1.03182	1.00902	1.08889	0.961648	0.899149	0.855403	4	5	2	12.4263	0.820351	-3.71078
Q8I291	Novel putative transporter 1, putative OS=Plasmodium falciparum (isolate 3D7) OX=36329 GN=PF3D7_0104800 PE=4 SV=1	37C	1	1.20423	1.05141	1.16717	1.15426	1.02375	1.07239	0.988672	1.025	1.07457	5	6	2	0.429646	0.298644	-4.16815
Q8ILU6	Uracil-DNA glycosylase OS=Plasmodium falciparum (isolate 3D7) OX=36329 GN=PF3D7_1415000 PE=3 SV=1	37C	1	1.01396	0.989576	1.03641	0.987027	1.0133	1.01647	1.06932	1.03286	1.09766	6	11	2	17.2228	0.659686	0.683292
C6KSX6	Rhoptry protein ROP14 OS=Plasmodium falciparum (isolate 3D7) OX=36329 GN=PF3D7_0613300 PE=3 SV=1	37C	1	0.968697	0.99809	0.996604	0.988886	1.02991	1.02248	1.02496	1.065	1.08599	5	9	2	4.45001	0.840005	0.545899
Q8IJP5	FAD synthetase, putative OS=Plasmodium falciparum (isolate 3D7) OX=36329 GN=PF3D7_1015000 PE=4 SV=1	37C	1	0.998768	0.950109	0.980397	1.00537	1.05729	1.00869	1.03545	1.04417	1.01444	4	6	2	0.183581	0.613941	2.3165
Q8IIE1	Uncharacterized protein OS=Plasmodium falciparum (isolate 3D7) OX=36329 GN=PF3D7_1122500 PE=4 SV=1	37C	1	0.971644	0.976618	1.00529	0.99739	0.96842	0.999645	0.956743	0.997467	0.902087	7	9	2	117.804	0.718765	-12.6452
A0A143ZZY9	DNA-directed RNA polymerase III subunit RPC8, putative OS=Plasmodium falciparum (isolate 3D7) OX=36329 GN=PF3D7_1104700.2 PE=3 SV=1	37C	1	1.07289	0.948796	1.01121	0.923192	1.01086	0.984317	0.974897	0.96223	1.02368	4	4	2	0.00618723	0.309853	-6.15994
Q8I2H9	Fip1 domain-containing protein OS=Plasmodium falciparum (isolate 3D7) OX=36329 GN=PF3D7_0933900 PE=3 SV=1	37C	1	1.03751	1.00634	1.02386	1.00294	1.03408	1.03326	1.05089	1.03452	1.0756	3	3	2	3.23164	0.603508	0.555113
Q8IBC1	Uncharacterized protein OS=Plasmodium falciparum (isolate 3D7) OX=36329 GN=PF3D7_0829000 PE=4 SV=2	37C	1	1.03095	1.04705	1.03678	1.00441	1.00102	1.07569	1.0798	1.05435	1.10304	7	7	2	2.01015	0.707751	4.99576
Q8IM54	DNA-directed RNA polymerase II subunit RPB4, putative OS=Plasmodium falciparum (isolate 3D7) OX=36329 GN=PF3D7_1404000 PE=4 SV=1	37C	1	1.01802	1.00354	1.02473	1.02767	1.01204	0.995492	1.04913	1.02418	1.05938	5	7	2	5.17218	0.411666	0.312641
Q8I5L4	Phospholipid-transporting ATPase OS=Plasmodium falciparum (isolate 3D7) OX=36329 GN=PF3D7_1219600 PE=3 SV=1	37C	1	1.09272	1.04601	1.08678	1.08197	1.02567	1.0744	1.06022	1.05071	1.0554	8	8	2	42.8891	0.487652	-0.000342089
O96167	Serine repeat antigen 1 OS=Plasmodium falciparum (isolate 3D7) OX=36329 GN=PF3D7_0208000 PE=3 SV=2	37C	1	1.04158	0.961342	1.03362	1.03154	1.00531	1.04913	1.03121	1.04035	1.0839	3	9	2	3.23593	0.413563	0.401301
Q8IJV1	Zinc finger protein, putative OS=Plasmodium falciparum (isolate 3D7) OX=36329 GN=PF3D7_1009400 PE=4 SV=1	37C	1	0.965096	0.979889	0.97854	0.927382	0.949318	0.956203	0.926159	0.864031	0.839432	5	9	2	22.2229	0.867223	-0.88071
Q8IJP4	CWC16 domain-containing protein, putative OS=Plasmodium falciparum (isolate 3D7) OX=36329 GN=PF3D7_1015100 PE=3 SV=1	37C	1	0.990771	0.98477	0.97139	0.9785	1.02641	0.975658	1.06418	1.04015	1.0715	3	4	2	6.96478	0.784689	5.68847
Q8I5H3	WD repeat-containing protein, putative OS=Plasmodium falciparum (isolate 3D7) OX=36329 GN=PF3D7_1224400 PE=4 SV=1	37C	1	0.999762	0.956532	0.97687	0.949588	1.01395	0.947994	1.00869	1.0354	1.01079	6	6	2	10.6572	0.429454	4.37473
A0A5K1K8K9	Exoribonuclease, putative OS=Plasmodium falciparum (isolate 3D7) OX=36329 GN=PF3D7_1337300 PE=4 SV=1	37C	1	0.989815	0.983489	0.965366	0.993143	0.978695	0.962144	0.953757	0.984792	0.948523	8	9	2	0.544405	0.50993	-0.209854
Q8IAX6	60S ribosomal protein L13 OS=Plasmodium falciparum (isolate 3D7) OX=36329 GN=PF3D7_0814000 PE=1 SV=1	37C	1	1.179	1.13163	1.27519	1.20263	1.05609	1.14117	1.10676	1.13197	1.09552	5	7	2	0.387335	0.103205	-3.01754
A0A5K1K8A8	Pre-mRNA-processing factor 40, putative OS=Plasmodium falciparum (isolate 3D7) OX=36329 GN=PF3D7_1316500 PE=4 SV=1	37C	1	1.04879	0.978218	1.0021	0.995702	0.989484	0.981485	0.937416	0.876589	0.794908	5	5	2	93.0744	0.94456	-0.68231
Q8IBN5	40S ribosomal protein S5, putative OS=Plasmodium falciparum (isolate 3D7) OX=36329 GN=PF3D7_0721600 PE=1 SV=1	37C	1	1.0703	1.07507	1.08037	1.09673	1.04818	1.06029	0.99936	0.956945	0.940586	5	8	2	11.7533	0.781472	-2.06622
Q9U0I5	Protein phosphatase PPM1, putative OS=Plasmodium falciparum (isolate 3D7) OX=36329 GN=PF3D7_0410300 PE=4 SV=2	37C	1	1.01039	0.998702	0.985305	1.05298	1.03649	1.02027	0.956515	0.935517	0.876755	7	7	2	33.6555	0.825262	-1.10904
Q8IBZ7	Glutaredoxin-like protein OS=Plasmodium falciparum (isolate 3D7) OX=36329 GN=PF3D7_0709200 PE=4 SV=1	37C	1	1.00166	1.01027	0.940804	0.976475	0.925359	0.970197	0.947945	0.922417	0.959044	5	5	2	0.0240758	0.702017	-8.71775
Q8I2R0	Splicing factor 3A subunit 3, putative OS=Plasmodium falciparum (isolate 3D7) OX=36329 GN=PF3D7_0924700 PE=3 SV=1	37C	1	1.04029	1.00243	1.01805	1.02569	1.00953	1.0005	1.0078	0.967275	0.934331	6	7	2	27.249	0.812265	-1.63405
Q8IHV7	CID domain-containing protein OS=Plasmodium falciparum (isolate 3D7) OX=36329 GN=PF3D7_1140800 PE=4 SV=2	37C	1	0.929448	0.957289	0.909498	0.931011	0.926816	0.935207	0.9283	0.921389	0.932007	5	7	2	4.0496e+10	0.782902	0.0158841
Q8IKU7	Uncharacterized protein OS=Plasmodium falciparum (isolate 3D7) OX=36329 GN=PF3D7_1453000 PE=4 SV=2	37C	1	0.977376	0.958163	0.959039	0.959962	0.946273	0.998483	0.931099	0.891648	0.885039	6	6	2	12.6553	0.804835	-5.59327
C0H556	Thiamine diphosphokinase OS=Plasmodium falciparum (isolate 3D7) OX=36329 GN=PF3D7_0924300 PE=4 SV=1	37C	1	0.955408	0.942343	0.963679	0.939561	0.925665	0.973848	0.956741	0.953397	0.923583	5	5	2	0.0027282	0.533772	-0.0372128
C0H523	Uncharacterized protein OS=Plasmodium falciparum (isolate 3D7) OX=36329 GN=PF3D7_0907000 PE=4 SV=1	37C	1	0.935326	0.970398	0.908502	0.947915	0.985809	1.03838	1.1809	1.23948	1.26009	4	10	2	6.00067	0.966365	1.33818
O97235	Elongation factor Ts, mitochondrial OS=Plasmodium falciparum (isolate 3D7) OX=36329 GN=PFC0225c PE=3 SV=2	37C	1	0.960305	0.939991	0.925767	0.926546	0.966965	0.925783	1.00667	0.972724	0.966466	4	6	2	6.17128	0.28209	8.33009
Q8IIP4	Ubiquitinyl hydrolase 1 OS=Plasmodium falciparum (isolate 3D7) OX=36329 GN=PF3D7_1111900 PE=4 SV=1	37C	1	1.03471	1.04875	1.02047	1.01077	1.00269	0.974376	0.928156	0.890507	1.01719	3	4	2	1.56532	0.534144	-1.56499
A0A5K1K8R3	Indole-3-glycerol-phosphate synthase OS=Plasmodium falciparum (isolate 3D7) OX=36329 GN=PF3D7_1363700 PE=4 SV=1	37C	1	1.04166	0.98994	0.998694	1.00777	1.04037	1.00925	1.01091	1.01959	1.04074	7	7	2	0.0224924	0.13855	0.146359
Q8I1S7	RNA-binding protein, putative OS=Plasmodium falciparum (isolate 3D7) OX=36329 GN=PF3D7_0416000 PE=4 SV=1	37C	1	0.934276	0.998565	0.995792	0.980606	0.95824	0.941982	1.00748	0.975103	0.983377	3	4	2	0.13443	0.0974663	0.000394642
A0A143ZUM0	Double-strand break repair protein MRE11 OS=Plasmodium falciparum (isolate 3D7) OX=36329 GN=PF3D7_0107800 PE=4 SV=1	37C	1	1.01901	1.02547	0.977083	1.04144	1.02069	1.0216	1.02346	1.01803	1.02461	4	6	2	0.00290379	0.153876	0.115462
Q8I2M1	Guanylate kinase OS=Plasmodium falciparum (isolate 3D7) OX=36329 GN=PF3D7_0928900 PE=1 SV=1	37C	1	0.949265	0.93224	0.902534	0.929752	0.967753	1.02625	1.33694	1.45066	1.52717	3	4	2	8.04196	0.985913	1.7143
Q8IET4	Methyltransferase, putative OS=Plasmodium falciparum (isolate 3D7) OX=36329 GN=PF3D7_1303100 PE=4 SV=1	37C	1	1.01909	1.01928	0.98703	1.00703	1.00155	0.993515	0.96997	0.94122	0.939799	5	5	2	10.3656	0.897359	-1.30283
C6KSS5	Protein PFF0380w OS=Plasmodium falciparum (isolate 3D7) OX=36329 GN=PFF0380w PE=1 SV=1	37C	1	0.981119	0.982602	0.967131	0.990841	0.970284	0.995134	0.967528	0.964137	0.972318	6	7	2	0.00995282	0.408049	-0.102788
C0H5I8	Uncharacterized protein OS=Plasmodium falciparum (isolate 3D7) OX=36329 GN=PF3D7_1358200 PE=4 SV=1	37C	1	0.966358	0.97731	0.987004	0.987717	0.999558	1.02535	1.01904	0.990211	1.03594	8	11	2	0.800074	0.589147	3.54316
Q8IBK3	Kelch domain-containing protein, putative OS=Plasmodium falciparum (isolate 3D7) OX=36329 GN=PF3D7_0724800 PE=4 SV=2	37C	1	0.975689	0.920605	0.95724	0.969661	1.00186	1.02455	1.1045	1.1558	1.18942	4	4	2	8.4431	0.948649	0.893806
A0A5K1K911	Sas10 domain-containing protein, putative OS=Plasmodium falciparum (isolate 3D7) OX=36329 GN=PF3D7_1358100 PE=3 SV=1	37C	1	1.00705	0.940233	0.926605	0.992947	0.958528	1.0013	1.00848	1.02	1.01444	4	4	2	2.25365	0.406149	3.29558
Q8IJ32	Dynamin-like protein OS=Plasmodium falciparum (isolate 3D7) OX=36329 GN=PF3D7_1037500 PE=4 SV=1	37C	1	1.08744	0.999061	1.05979	1.08837	1.01071	1.07079	1.01595	0.992258	1.01904	7	8	2	8.07533	0.208336	-3.35819
O77329	N2227-like protein, putative OS=Plasmodium falciparum (isolate 3D7) OX=36329 GN=PF3D7_0309300 PE=4 SV=1	37C	1	1.09279	1.04073	1.0454	1.01948	1.00449	1.04482	0.959312	0.98314	0.902087	5	5	2	12.0472	0.650648	-0.717729
Q8IDY5	MSP7-like protein OS=Plasmodium falciparum (isolate 3D7) OX=36329 GN=PF3D7_1334300 PE=4 SV=1	37C	1	1.01897	0.994254	1.00159	0.978505	1.0031	0.986426	1.08045	1.00303	1.07048	6	7	2	5.68821	0.557966	4.81734
O97245	Glycerol-3-phosphate dehydrogenase OS=Plasmodium falciparum (isolate 3D7) OX=36329 GN=PF3D7_0306400 PE=3 SV=1	37C	1	1.11712	1.009	1.09756	1.1055	0.975507	1.01057	0.915973	0.92503	0.885039	3	3	2	3.29612	0.69661	-0.962719
A0A143ZYZ7	DNA-directed DNA polymerase OS=Plasmodium falciparum (isolate 3D7) OX=36329 GN=PF3D7_1037000 PE=3 SV=1	37C	1	0.948449	0.97567	1.01342	0.960215	0.974307	1.03781	1.01637	0.930063	1.05047	7	9	2	1.24994	0.139561	2.88704
C6KTD0	Amino acid transporter AAT1 OS=Plasmodium falciparum (isolate 3D7) OX=36329 GN=PF3D7_0629500 PE=4 SV=1	37C	1	0.97854	0.991335	1.02161	0.976838	0.996875	0.96304	0.998317	1.04979	1.0369	5	8	2	18.8413	0.66202	4.03749
C6KTC7	DnaJ protein, putative OS=Plasmodium falciparum (isolate 3D7) OX=36329 GN=PF3D7_0629200 PE=4 SV=1	37C	1	0.97775	1.02075	0.992127	0.986237	0.973004	1.04993	1.10034	1.16642	1.16236	7	11	2	7.33687	0.953124	1.3656
Q8IKC7	Inorganic anion exchanger, inorganic anion antiporter OS=Plasmodium falciparum (isolate 3D7) OX=36329 GN=PF3D7_1471200 PE=4 SV=1	37C	1	1.18492	1.06203	1.14	1.14749	0.992762	1.02438	0.966138	0.980064	1.00447	5	5	2	0.465489	0.567169	-5.41526
C6KT62	16S rRNA (uracil(1498)-N(3))-methyltransferase OS=Plasmodium falciparum (isolate 3D7) OX=36329 GN=PF3D7_0622500 PE=3 SV=1	37C	1	0.938666	0.965901	0.91417	0.965107	0.96849	0.955354	0.955091	0.932972	0.984238	4	6	2	20.9075	0.348932	0.000182023
A0A5K1K8T4	Uncharacterized protein OS=Plasmodium falciparum (isolate 3D7) OX=36329 GN=PF3D7_1329600 PE=4 SV=1	37C	1	0.988501	1.0189	0.976997	1.03221	0.994762	1.05037	0.988861	1.04384	1.01904	4	5	2	0.207062	0.200288	0.951941
Q8I457	RNA helicase OS=Plasmodium falciparum (isolate 3D7) OX=36329 GN=PF3D7_0504400 PE=3 SV=1	37C	1	0.97951	1.00065	0.918873	1.05759	0.99201	1.01978	1.00955	1.0262	1.01261	4	4	2	0.103188	0.349632	3.36879
Q8IKA0	Nucleoporin NUP116/NSP116, putative OS=Plasmodium falciparum (isolate 3D7) OX=36329 GN=PF3D7_1473700 PE=4 SV=1	37C	1	0.975595	0.988574	1.0062	0.996644	1.00773	0.965782	1.00021	0.929715	0.904992	5	6	2	40.3255	0.855467	-4.06653
O96267	Pre-mRNA-processing protein 45, putative OS=Plasmodium falciparum (isolate 3D7) OX=36329 GN=PF3D7_0218700 PE=3 SV=3	37C	1	1.01004	0.980334	0.969794	1.02484	0.983945	0.977396	0.990937	0.947276	0.992056	6	7	2	0.868867	0.20553	-2.24515
C6KSM6	SAC3 domain-containing protein, putative OS=Plasmodium falciparum (isolate 3D7) OX=36329 GN=PF3D7_0602600 PE=4 SV=1	37C	1	0.992565	0.967346	0.965471	0.991699	1.00835	0.991565	1.01179	1.01327	0.97316	8	13	2	0.185622	0.261198	5.09539
Q8IJA5	Transcription elongation factor SPT4, putative OS=Plasmodium falciparum (isolate 3D7) OX=36329 GN=PF3D7_1030000 PE=3 SV=1	37C	1	0.968576	0.9585	1.03393	0.953125	1.01658	0.977447	1.01157	0.981218	1.01079	4	4	2	8.70811	0.0552367	0.427374
Q8IHW1	Uncharacterized protein OS=Plasmodium falciparum (isolate 3D7) OX=36329 GN=PF3D7_1140400 PE=4 SV=1	37C	1	0.98104	0.981311	0.969358	0.972211	1.01704	1.00062	1.00469	1.03159	1.04558	2	7	2	9.42342	0.73129	0.655139
C0H4P6	Uncharacterized protein OS=Plasmodium falciparum (isolate 3D7) OX=36329 GN=PF3D7_0727100 PE=4 SV=1	37C	1	1.02296	0.987359	1.00876	0.994833	0.954862	0.985073	0.985059	1.03086	1.10958	7	7	2	62.2796	0.819564	3.36904
Q8I2K8	Peptidyl-prolyl cis-trans isomerase OS=Plasmodium falciparum (isolate 3D7) OX=36329 GN=PF3D7_0930600.1 PE=4 SV=1	37C	1	0.978521	0.964321	0.98766	0.942262	0.966135	0.990216	1.06398	1.08621	1.14112	5	6	2	14.6467	0.917579	1.13947
Q8IID0	RING zinc finger protein, putative OS=Plasmodium falciparum (isolate 3D7) OX=36329 GN=PF3D7_1123300 PE=4 SV=1	37C	1	1.01485	0.938755	0.933341	0.993811	1.01116	0.955405	0.983843	0.952437	0.934331	7	7	2	0.918155	0.172699	-0.15563
Q8IBQ2	Exosome complex component CSL4, putative OS=Plasmodium falciparum (isolate 3D7) OX=36329 GN=PF3D7_0720000 PE=4 SV=1	37C	1	0.991545	0.990555	0.97216	0.988365	0.997631	0.964168	0.918673	0.900754	0.845749	4	6	2	37.7914	0.956953	-0.691122
Q8I2K5	Elongation factor Tu, putative OS=Plasmodium falciparum (isolate 3D7) OX=36329 GN=PF3D7_0931000 PE=4 SV=1	37C	1	0.957661	1.01683	0.980025	0.991017	1.03844	0.954631	0.982234	0.923133	0.99469	4	5	2	1.81702	0.267428	-4.53618
Q8IB14	High mobility group protein B2 OS=Plasmodium falciparum (isolate 3D7) OX=36329 GN=PF3D7_0817900 PE=1 SV=1	37C	1	0.969448	1.00172	0.987267	0.981417	1.00519	1.02439	1.06243	1.09557	1.0117	3	5	2	2.4528	0.66284	1.76636
O77390	Kinetochore protein NUF2, putative OS=Plasmodium falciparum (isolate 3D7) OX=36329 GN=PF3D7_0316500 PE=3 SV=2	37C	1	1.03404	1.00256	1.00285	1.04607	1.00491	1.01374	0.991597	0.96234	0.971478	6	6	2	7.39518	0.6257	-1.7467
Q8IB25	Cleavage and polyadenylation specificity factor subunit 2 OS=Plasmodium falciparum (isolate 3D7) OX=36329 GN=PF3D7_0819000 PE=3 SV=1	37C	1	1.00117	0.970867	0.922857	0.981613	0.960632	0.964514	0.945143	0.928228	0.8992	7	8	2	20.4464	0.62633	-0.219907
Q8I662	Uncharacterized protein OS=Plasmodium falciparum (isolate 3D7) OX=36329 GN=PF3D7_0208700.1 PE=4 SV=1	37C	1	0.850317	1.11952	0.810434	0.92656	0.87294	0.891572	0.829047	0.879515	0.809215	3	5	2	0.453003	0.292368	-0.227575
C6KT14	Uncharacterized protein OS=Plasmodium falciparum (isolate 3D7) OX=36329 GN=PF3D7_0617300 PE=4 SV=1	37C	1	1.04927	1.00253	0.959774	1.02402	1.02777	1.03328	0.947043	0.89823	0.897764	3	4	2	11.6001	0.811534	-4.17056
Q8IJA4	Pre-mRNA-splicing factor ATP-dependent RNA helicase PRP22, putative OS=Plasmodium falciparum (isolate 3D7) OX=36329 GN=PF3D7_1030100 PE=4 SV=1	37C	1	0.926946	0.988092	0.971677	0.940775	0.997162	1.03751	1.0641	1.0019	1.10196	4	4	2	1.21758	0.643641	2.04902
Q8IBQ5	40S ribosomal protein S10, putative OS=Plasmodium falciparum (isolate 3D7) OX=36329 GN=PF3D7_0719700 PE=1 SV=1	37C	1	1.0021	1.0507	1.00615	1.01663	1.10333	1.05728	1.11391	1.07771	1.09232	5	8	2	0.338805	0.774376	3.36346
C0H4X1	U5 small nuclear ribonucleoprotein 40 kDa protein, putative OS=Plasmodium falciparum (isolate 3D7) OX=36329 GN=PF3D7_0822800 PE=4 SV=1	37C	1	0.976626	0.950463	0.896185	0.975234	0.955312	0.989316	1.05321	1.13032	1.1365	5	5	2	11.3537	0.882173	1.45989
Q8IHU1	Coproporphyrinogen oxidase OS=Plasmodium falciparum (isolate 3D7) OX=36329 GN=PF3D7_1142400 PE=3 SV=1	37C	1	1.00324	1.01142	0.991812	1.01841	1.02805	1.05804	1.09127	1.1385	1.15046	8	8	2	7.48044	0.987261	0.74455
C0H4T1	Coatomer subunit epsilon, putative OS=Plasmodium falciparum (isolate 3D7) OX=36329 GN=PF3D7_0808400 PE=3 SV=1	37C	1	1.01006	1.01372	1.02931	1.01367	1.02249	1.04628	1.04138	1.07566	1.08915	5	7	2	5.01872	0.895764	0.510683
Q8I2R1	Uncharacterized protein OS=Plasmodium falciparum (isolate 3D7) OX=36329 GN=PF3D7_0924600 PE=4 SV=1	37C	1	0.997783	0.989554	0.964573	1.03859	1.00026	0.975523	0.880306	0.84375	0.763069	6	7	2	20.6711	0.93682	-0.967536
Q8IEK0	GYF domain-containing protein, putative OS=Plasmodium falciparum (isolate 3D7) OX=36329 GN=PF3D7_1312100 PE=4 SV=1	37C	1	1.01353	0.949903	0.950954	1.01672	0.984062	1.02438	1.04041	1.0065	1.00898	6	6	2	1.4739	0.345925	3.46208
C6KT45	Cleavage stimulation factor 50 kDa subunit OS=Plasmodium falciparum (isolate 3D7) OX=36329 GN=PF3D7_0620500 PE=4 SV=1	37C	1	1.0209	1.0263	1.02739	1.02762	0.997286	1.06394	1.02402	1.03267	1.05838	7	7	2	0.530126	0.373883	0.160731
Q8IB50	Polyribonucleotide 5'-hydroxyl-kinase Clp1, putative OS=Plasmodium falciparum (isolate 3D7) OX=36329 GN=PF3D7_0821600 PE=4 SV=1	37C	1	0.99845	0.964832	0.995586	1.0055	0.991298	0.966238	0.960857	0.934839	0.910859	5	5	2	22.5258	0.859238	-0.793522
Q8I2G9	U2 small nuclear ribonucleoprotein B'', putative OS=Plasmodium falciparum (isolate 3D7) OX=36329 GN=PF3D7_0935000 PE=4 SV=1	37C	1	1.05138	0.99626	1.00669	1.00402	1.0194	0.985998	1.03845	1.06622	1.08285	4	5	2	14.5917	0.704184	2.56441
Q8I0W4	tRNA pseudouridine synthase OS=Plasmodium falciparum (isolate 3D7) OX=36329 GN=PF3D7_0908700 PE=3 SV=2	37C	1	0.94064	0.985689	0.975622	1.00758	0.95765	0.982832	0.932175	0.942173	0.929694	4	7	2	5.79331	0.54712	-7.78473
Q8I585	Homocysteine S-methyltransferase, putative OS=Plasmodium falciparum (isolate 3D7) OX=36329 GN=PF3D7_1233700 PE=4 SV=1	37C	1	1.05946	1.01311	1.01916	1.03668	1.03423	0.988028	0.947578	0.958381	0.926628	5	6	2	3.32008	0.83613	-2.80942
A0A146M145	Uncharacterized protein OS=Plasmodium falciparum (isolate 3D7) OX=36329 GN=PF3D7_0906890 PE=4 SV=1	37C	1	1.01657	0.966696	1.00573	1.0297	1.04046	1.0032	1.10011	1.14389	1.23652	2	3	2	27.1371	0.924068	0.931818
C6KSZ5	Ribonuclease, putative OS=Plasmodium falciparum (isolate 3D7) OX=36329 GN=PF3D7_0615400 PE=4 SV=2	37C	1	1.04119	0.988244	0.982208	1.02861	0.975276	0.988238	0.947364	1.00349	1.01812	6	8	2	0.00701727	0.199036	-6.03788
Q8ILL2	60S ribosomal protein L7a OS=Plasmodium falciparum (isolate 3D7) OX=36329 GN=PF3D7_1424400 PE=1 SV=2	37C	1	1.11741	1.11098	1.14838	1.14524	1.05012	1.10001	1.01106	0.964226	0.778393	6	6	2	72.5705	0.829637	-1.07302
Q7KWI7	Uncharacterized protein OS=Plasmodium falciparum (isolate 3D7) OX=36329 GN=PF3D7_0220200 PE=4 SV=1	37C	1	1.21357	1.08845	1.09702	1.2508	1.0272	0.910173	0.816691	0.761273	0.60107	2	2	2	7.16814	0.851661	-0.812229
Q8IKJ2	Uncharacterized protein OS=Plasmodium falciparum (isolate 3D7) OX=36329 GN=PF3D7_1464500 PE=4 SV=2	37C	1	0.981152	1.04796	0.956324	0.997633	0.971135	1.01904	0.949166	0.963304	0.971478	5	6	2	0.353954	0.183809	-0.448782
Q8II54	RNA-binding protein s1, putative OS=Plasmodium falciparum (isolate 3D7) OX=36329 GN=PF3D7_1131000 PE=4 SV=1	37C	1	0.917946	0.937454	0.865179	0.895792	0.959676	0.925668	1.13601	1.21855	1.24889	4	8	2	10.4077	0.932009	4.05395
A0A143ZVM1	Cytoadherence linked asexual protein 8 OS=Plasmodium falciparum (isolate 3D7) OX=36329 GN=PF3D7_0831600 PE=4 SV=1	37C	1	0.983337	1.06459	1.02751	1.06424	0.957145	0.999641	0.935771	1.06047	1.0902	1	10	2	0.209978	0.0300397	0.126948
Q8IDH5	Thioredoxin-related protein, putative OS=Plasmodium falciparum (isolate 3D7) OX=36329 GN=PF3D7_1352500 PE=4 SV=1	37C	1	1.04756	1.04887	1.0446	1.0524	0.983219	1.10568	1.04027	1.06531	1.01444	3	8	2	0.736289	0.167437	3.82602e-05
C6KT11	Mitochondrial import receptor subunit TOM40, putative OS=Plasmodium falciparum (isolate 3D7) OX=36329 GN=PF3D7_0617000 PE=3 SV=1	37C	1	1.26852	1.16845	1.22186	1.25182	1.06674	1.15322	1.10456	1.14614	1.22842	4	4	2	45.7687	0.433254	-0.000149791
Q8I1T6	Uncharacterized protein OS=Plasmodium falciparum (isolate 3D7) OX=36329 GN=PF3D7_0415200 PE=4 SV=1	37C	1	0.93488	0.967551	0.917512	0.935356	0.918197	0.942063	0.917245	0.92268	0.867954	10	10	2	1.77838	0.711783	-0.124135
Q8I3L1	7-helix-1 protein OS=Plasmodium falciparum (isolate 3D7) OX=36329 GN=PF3D7_0525400 PE=4 SV=1	37C	1	1.01104	1.01696	1.02087	1.06555	1.03673	1.08777	1.06165	1.09035	0.980803	4	4	2	0.00306607	0.262299	0.49114
Q8IM22	Uncharacterized protein OS=Plasmodium falciparum (isolate 3D7) OX=36329 GN=PF3D7_1407200 PE=4 SV=2	37C	1	0.991835	1.02913	1.04847	1.0164	1.01439	1.00891	1.00747	0.948062	0.999111	7	7	2	14.99	0.429047	-3.00644
Q8I2T6	Uncharacterized protein OS=Plasmodium falciparum (isolate 3D7) OX=36329 GN=PF3D7_0921700 PE=4 SV=1	37C	1	1.02834	1.01076	1.05917	1.03176	1.00045	1.00125	0.892291	0.863466	0.841317	6	6	2	7.47663	0.949147	-1.98005
O96233	Uncharacterized protein OS=Plasmodium falciparum (isolate 3D7) OX=36329 GN=PF3D7_0215400 PE=4 SV=1	37C	1	0.950322	0.971635	0.965577	0.984278	0.969455	0.950767	0.816713	0.721897	0.623751	7	10	2	20.6116	0.98294	-1.06292
Q8ILC0	Uncharacterized protein OS=Plasmodium falciparum (isolate 3D7) OX=36329 GN=PF3D7_1434400 PE=4 SV=2	37C	1	1.02304	0.977235	0.993402	0.974981	0.982235	0.960567	0.911765	0.875259	0.852807	2	3	2	13.5284	0.952604	-0.693201
Q8IFM9	Early transcribed membrane protein 4 OS=Plasmodium falciparum (isolate 3D7) OX=36329 GN=PF3D7_0423700 PE=4 SV=1	37C	1	1.17836	1.09326	1.14841	1.17549	1.05761	1.11767	1.0703	1.05683	1.07766	4	10	2	6.67061	0.117686	-1.63543
Q8II57	Structural maintenance of chromosomes protein 1, putative OS=Plasmodium falciparum (isolate 3D7) OX=36329 GN=PF3D7_1130700 PE=4 SV=1	37C	1	0.98895	1.00727	1.02145	0.972643	1.03031	1.00792	0.995704	0.929217	1.00447	4	6	2	15.2634	0.284406	-3.02608
O96149	PCI domain-containing protein, putative OS=Plasmodium falciparum (isolate 3D7) OX=36329 GN=PF3D7_0205400 PE=4 SV=2	37C	1	1.04618	1.00327	0.972027	1.03631	0.987101	0.992744	0.977536	0.957782	0.963979	5	8	2	2.5343	0.476532	-0.757659
O97285	ATP-dependent RNA helicase DDX6 OS=Plasmodium falciparum (isolate 3D7) OX=36329 GN=PF3D7_0320800 PE=3 SV=1	37C	1	0.987504	1.00247	1.01736	1.01967	0.988266	0.992726	0.976727	0.956983	0.992933	3	5	2	2.43781	0.491487	-1.40989
Q8IDR2	DNA-directed RNA polymerases I, II, and III subunit RPABC4, putative OS=Plasmodium falciparum (isolate 3D7) OX=36329 GN=PF3D7_1342700 PE=3 SV=1	37C	1	0.935906	0.928126	0.896083	0.967303	0.878394	0.90442	0.937063	0.916498	0.907916	2	4	2		0.0468265	0.000122733
Q8IIK1	Folate transporter 2 OS=Plasmodium falciparum (isolate 3D7) OX=36329 GN=PF3D7_1116500 PE=3 SV=1	37C	1	1.16197	1.06465	1.11135	1.14123	1.03549	1.09138	1.0054	1.01973	1.05047	3	3	2	5.56461	0.269693	-4.43989
Q8I5M4	Triose or hexose phosphate/phosphate translocator, putative OS=Plasmodium falciparum (isolate 3D7) OX=36329 GN=PF3D7_1218400 PE=4 SV=2	37C	1	1.05969	1.04681	0.99622	1.08159	1.0532	1.03344	1.01619	1.00103	0.995571	3	3	2	3.46212	0.286026	-3.26179
Q8I405	Nse4_C domain-containing protein OS=Plasmodium falciparum (isolate 3D7) OX=36329 GN=PF3D7_0509900 PE=4 SV=1	37C	1	0.959567	0.963773	0.944928	1.0017	0.978798	0.947279	0.970562	0.985582	1.00807	3	3	2	31.7619	0.261559	2.03966
Q8IJV9	Protein GPR89, putative OS=Plasmodium falciparum (isolate 3D7) OX=36329 GN=PF3D7_1008500 PE=4 SV=2	37C	1	0.947331	1.00082	0.975802	0.964247	1.01551	0.969464	0.962657	0.912896	0.941374	5	7	2	14.4139	0.54508	-4.34231
Q8IJM4	Myosin essential light chain ELC OS=Plasmodium falciparum (isolate 3D7) OX=36329 GN=PF3D7_1017500 PE=1 SV=1	37C	1	0.97538	1.00294	1.03784	1.0061	1.05768	1.03539	1.07967	1.03117	1.09126	2	4	2	0.326484	0.652331	0.492197
Q8IK92	Vacuole membrane protein 1, putative OS=Plasmodium falciparum (isolate 3D7) OX=36329 GN=PF3D7_1474600 PE=4 SV=1	37C	1	1.16464	1.08584	1.16878	1.13197	1.05938	1.06571	1.01126	0.996706	0.966466	2	3	2	5.283	0.54845	-0.983297
Q8I379	GTPase-activating protein, putative OS=Plasmodium falciparum (isolate 3D7) OX=36329 GN=PF3D7_0907200 PE=4 SV=1	37C	1	0.857545	0.946738	0.866038	0.896928	0.926249	0.912057	0.911181	0.909928	0.913079	4	4	2	40.3342	0.567561	0.000313082
Q8IDQ3	UDP-N-acetylglucosamine pyrophosphorylase, putative OS=Plasmodium falciparum (isolate 3D7) OX=36329 GN=PF3D7_1343600 PE=4 SV=2	37C	1	0.980855	0.959513	0.931488	0.992157	0.959217	0.978642	1.04581	1.12278	1.02555	5	5	2	9.02696	0.700194	3.24146
Q8IB55	Mediator of RNA polymerase II transcription subunit 7 OS=Plasmodium falciparum (isolate 3D7) OX=36329 GN=PF3D7_0822100 PE=3 SV=1	37C	1	1.08911	1.0619	1.07241	1.0292	1.06197	1.05475	1.03869	1.05279	1.07354	3	6	2	52.1568	0.542673	-0.000102785
Q8II04	Uncharacterized protein OS=Plasmodium falciparum (isolate 3D7) OX=36329 GN=PF3D7_1136000 PE=4 SV=1	37C	1	0.409067	0.889488	0.4247	0.414548	0.417586	0.417638	0.445157	0.403399	0.462361	7	7	2		0.027922	0.000589297
Q8ILA2	Basal complex protein BCP1 OS=Plasmodium falciparum (isolate 3D7) OX=36329 GN=PF3D7_1436200 PE=4 SV=1	37C	1	1.02747	0.976083	1.01102	0.997712	1.00772	1.00268	0.97953	1.01779	1.03786	6	7	2	5.21784	0.110696	0.661493
Q8IJB3	WD repeat-containing protein, putative OS=Plasmodium falciparum (isolate 3D7) OX=36329 GN=PF3D7_1029200 PE=4 SV=1	37C	1	1.04394	0.960611	1.01264	1.0339	1.01241	0.961409	0.984174	1.00056	1.01719	3	4	2	1.10086	0.125559	-3.48233
Q8IB88	Protein KRI1, putative OS=Plasmodium falciparum (isolate 3D7) OX=36329 GN=PF3D7_0825500 PE=3 SV=1	37C	1	0.924693	0.926114	0.897721	0.94493	0.977996	0.946805	1.00806	1.05814	1.09339	4	5	2	19.202	0.797427	1.04442
Q8IKY6	HSP20-like chaperone, putative OS=Plasmodium falciparum (isolate 3D7) OX=36329 GN=PF3D7_1448700 PE=4 SV=1	37C	1	1.00049	0.990937	0.982264	0.985866	1.0152	0.963973	0.998412	0.994061	1.02089	3	5	2	1.54251	0.042403	0.637584
C0H4Q0	Signal recognition particle subunit SRP9 OS=Plasmodium falciparum (isolate 3D7) OX=36329 GN=PF3D7_0729000 PE=4 SV=1	37C	1	1.03299	0.994277	0.960431	1.03891	1.02974	0.980431	0.993094	1.00552	1.02742	2	8	2		0.0749692	-0.00011157
Q8II94	Sm protein F OS=Plasmodium falciparum (isolate 3D7) OX=36329 GN=PF3D7_1126900 PE=3 SV=2	37C	1	1.03728	1.06914	1.06994	1.07462	1.07377	1.0992	1.10245	1.06769	1.124	4	8	2	0.0377938	0.818261	0.180288
Q8IIV2	Histone H4 OS=Plasmodium falciparum (isolate 3D7) OX=36329 GN=PF3D7_1105000 PE=3 SV=1	37C	1	1.142	1.1283	1.11065	1.15742	1.11984	1.10473	1.17531	1.24147	1.29344	4	6	2	0.489781	0.720106	0.154251
Q8I386	Maf-like protein, putative OS=Plasmodium falciparum (isolate 3D7) OX=36329 GN=PF3D7_0906300 PE=4 SV=1	37C	1	0.930907	0.933484	0.898639	0.924521	0.959772	0.998586	1.13563	1.21428	1.24199	6	6	2	8.24141	0.959233	1.37264
Q8I616	High mobility group protein B1 OS=Plasmodium falciparum (isolate 3D7) OX=36329 GN=PF3D7_1202900 PE=4 SV=1	37C	1	0.9848	0.959519	0.962966	0.964556	0.937493	1.03052	1.00381	1.08106	0.968131	6	24	2	1.66311	0.420664	8.16413
A0A143ZY29	Regulator of nonsense transcripts 1, putative OS=Plasmodium falciparum (isolate 3D7) OX=36329 GN=PF3D7_1005500 PE=3 SV=1	37C	1	0.956499	1.00215	0.967749	1.01141	1.05371	1.03228	1.14383	1.13488	1.0756	5	7	2	1.19085	0.78708	0.92922
Q9U0H7	Mediator of RNA polymerase II transcription subunit 8, putative OS=Plasmodium falciparum (isolate 3D7) OX=36329 GN=PF3D7_0411100 PE=4 SV=1	37C	1	0.887539	0.922153	0.879878	0.912882	0.903956	0.964918	1.04962	1.03711	1.23652	2	3	2	237.66	0.852434	0.676485
Q8I514	Uncharacterized protein OS=Plasmodium falciparum (isolate 3D7) OX=36329 GN=PF3D7_1241500 PE=4 SV=1	37C	1	1.10297	1.09835	1.04046	1.10688	1.11985	1.02252	1.05934	0.958785	1.03978	3	3	2	6.49426	0.29582	-1.41037
C0H521	Leucine-rich repeat protein OS=Plasmodium falciparum (isolate 3D7) OX=36329 GN=PF3D7_0906700 PE=4 SV=1	37C	1	1.02207	1.0053	0.962312	0.99959	0.989272	0.996785	1.08727	1.11333	1.17205	4	5	2	15.6176	0.917438	1.25024
Q8IJZ2	Uncharacterized protein OS=Plasmodium falciparum (isolate 3D7) OX=36329 GN=PF3D7_1004500 PE=4 SV=1	37C	1	0.994423	1.00895	1.01012	1.01068	0.996457	1.03476	0.935303	0.88169	0.827079	5	5	2	22.6012	0.94516	-1.44283
Q8ILB3	Ribonuclease H2 subunit B, putative OS=Plasmodium falciparum (isolate 3D7) OX=36329 GN=PF3D7_1435100 PE=4 SV=1	37C	1	0.968037	1.0174	0.945779	0.935536	0.96284	0.971383	0.95258	0.934522	0.907916	5	9	2	12.0787	0.542675	-0.203664
Q8I2X6	GPN-loop GTPase 2 OS=Plasmodium falciparum (isolate 3D7) OX=36329 GN=PF3D7_0917700 PE=3 SV=1	37C	1	1.04308	0.9568	0.978086	1.02866	0.990687	1.06633	0.985283	1.00273	0.980803	3	4	2	24.2218	0.0513227	1.79901
Q8I381	Tubulin-specific chaperone, putative OS=Plasmodium falciparum (isolate 3D7) OX=36329 GN=PF3D7_0906910 PE=4 SV=2	37C	1	0.996374	0.915292	0.94354	0.972282	1.00143	1.0159	0.999176	0.989863	1.03882	3	4	2	0.435169	0.425726	2.35665
Q8I5J7	Protein TSSC1, putative OS=Plasmodium falciparum (isolate 3D7) OX=36329 GN=PF3D7_1221600 PE=3 SV=1	37C	1	0.968461	0.997647	0.957519	0.965353	0.950848	0.966965	0.937618	0.915931	0.886435	4	6	2	15.7053	0.836177	-0.355937
Q8IJM9	Early transcribed membrane protein 10.3 OS=Plasmodium falciparum (isolate 3D7) OX=36329 GN=PF3D7_1016900 PE=4 SV=2	37C	1	1.05511	1.03625	1.08455	1.06142	1.0116	1.06781	0.991745	1.02491	0.993811	1	2	2	4.47876	0.28732	-2.19089
Q8IIU7	Translocon component PTEX88 OS=Plasmodium falciparum (isolate 3D7) OX=36329 GN=PF3D7_1105600 PE=4 SV=2	37C	1	1.03356	1.01537	1.02894	1.02609	1.00054	1.0426	1.00356	1.02525	1.00089	7	8	2	0.37618	0.1526	-8.71077e-05
Q8I5F8	Uncharacterized protein OS=Plasmodium falciparum (isolate 3D7) OX=36329 GN=PF3D7_1225900 PE=4 SV=1	37C	1	1.26725	1.07809	1.29801	1.2728	1.12534	1.0538	0.670436	0.598157	0.504715	3	5	2	6.39034	0.89864	-1.8433
Q8I2S2	Uncharacterized protein OS=Plasmodium falciparum (isolate 3D7) OX=36329 GN=PF3D7_0923400 PE=4 SV=1	37C	1	1.00867	1.00133	1.04298	1.03581	1.01357	1.00607	0.979281	0.986746	0.95497	4	5	2	7.03044	0.650223	-1.25686
Q8IM21	Pre-mRNA-splicing factor 38B, putative OS=Plasmodium falciparum (isolate 3D7) OX=36329 GN=PF3D7_1407300 PE=3 SV=1	37C	1	1.0119	0.956319	1.01013	0.969412	1.01212	0.957147	0.969109	0.969118	0.984238	2	4	2	1.21922	0.161808	-0.259059
Q8IE09	60S ribosomal protein L23, putative OS=Plasmodium falciparum (isolate 3D7) OX=36329 GN=PF3D7_1331800 PE=1 SV=1	37C	1	1.0253	1.08281	1.07158	1.05637	1.01555	1.0629	1.0663	1.03457	0.984238	4	7	2	27.3535	0.249348	-2.77273
Q8I283	Cyclin-dependent kinases regulatory subunit OS=Plasmodium falciparum (isolate 3D7) OX=36329 GN=PF3D7_0105800 PE=3 SV=1	37C	1	0.996287	0.991777	1.01749	1.00508	1.02418	1.01397	1.01179	1.07012	1.04267	8	12	2	8.66686	0.655558	0.514542
Q8IC13	Mediator of RNA polymerase II transcription subunit 10, putative OS=Plasmodium falciparum (isolate 3D7) OX=36329 GN=PF3D7_0707600 PE=4 SV=1	37C	1	1.05144	1.0138	1.01981	1.08052	0.98947	1.00301	0.996474	1.0275	1.02089	3	5	2	0.0198551	0.0657337	-0.000177679
B9ZSI9	Uncharacterized protein OS=Plasmodium falciparum (isolate 3D7) OX=36329 GN=PF3D7_0111400 PE=4 SV=1	37C	1	0.981292	0.963837	0.995071	0.985004	1.03032	0.996035	1.01496	1.05585	1.03882	5	6	2	5.41922	0.656474	0.558532
Q8I5Z0	Zinc finger protein, putative OS=Plasmodium falciparum (isolate 3D7) OX=36329 GN=PF3D7_1205500 PE=3 SV=1	37C	1	0.961602	1.05258	0.955811	1.0188	0.948172	1.00493	1.0011	1.04759	1.0715	5	6	2	22.028	0.4529	2.02988
Q8IIC2	BEACH domain-containing protein, putative OS=Plasmodium falciparum (isolate 3D7) OX=36329 GN=PF3D7_1124100 PE=4 SV=1	37C	1	0.989798	0.998159	1.04347	1.04051	1.00046	1.01202	0.959829	0.959716	0.897764	3	5	2	51.3482	0.779066	-0.840608
C6KT21	Uncharacterized protein OS=Plasmodium falciparum (isolate 3D7) OX=36329 GN=PF3D7_0618100 PE=4 SV=1	37C	1	1.02598	0.980821	1.00332	1.00067	0.999482	1.00148	0.883038	0.854512	0.832593	4	4	2	9.37965	0.97254	-3.79927
O77334	Dual specificity protein phosphatase OS=Plasmodium falciparum (isolate 3D7) OX=36329 GN=PF3D7_0309000 PE=4 SV=3	37C	1	0.953087	0.945332	0.955655	0.943529	0.958162	0.958962	0.968583	0.923465	0.944538	3	4	2	0.00288259	0.642664	-0.0300891
Q8ID52	SNARE associated Golgi protein, putative OS=Plasmodium falciparum (isolate 3D7) OX=36329 GN=PF3D7_1365700 PE=4 SV=1	37C	1	1.00378	1.0007	0.959279	0.964499	0.984268	1.0159	1.0785	1.20402	1.18691	2	3	2	13.5863	0.960567	2.16521
Q8IBQ0	Uncharacterized protein OS=Plasmodium falciparum (isolate 3D7) OX=36329 GN=PF3D7_0720200 PE=4 SV=1	37C	1	0.936782	0.997558	0.983973	1.04113	1.05287	1.00839	1.03788	1.0762	1.10413	2	3	2	1.4116	0.671527	0.415363
Q8I607	Ubiquitin-conjugating enzyme E2 OS=Plasmodium falciparum (isolate 3D7) OX=36329 GN=PF3D7_1203900 PE=3 SV=1	37C	1	1.04191	1.05584	1.10627	1.05118	1.0989	1.09309	1.17009	1.19914	1.27438	4	12	2	2.79912	0.859981	0.350877
C6KSL9	Uncharacterized protein OS=Plasmodium falciparum (isolate 3D7) OX=36329 GN=PF3D7_0601900 PE=4 SV=1	37C	1	1.16516	1.13005	1.17869	1.09517	1.07524	1.10233	1.05025	0.962419	0.941374	2	5	2	17.4918	0.63726	-1.69313
Q8IKI6	Mediator of RNA polymerase II transcription subunit 4, putative OS=Plasmodium falciparum (isolate 3D7) OX=36329 GN=PF3D7_1465200 PE=4 SV=1	37C	1	1.00541	0.982397	0.962115	0.988131	0.999158	0.994297	0.952729	1.0184	0.942163	5	5	2	2.70774	0.120421	-0.188934
Q8I461	Cation transporting P-ATPase OS=Plasmodium falciparum (isolate 3D7) OX=36329 GN=PF3D7_0504000 PE=4 SV=1	37C	1	0.938017	0.982677	0.931196	0.950019	0.947224	0.961811	0.936081	0.957047	0.902811	5	8	2	0.341476	0.49904	-0.0879096
Q8I1P2	Uncharacterized protein OS=Plasmodium falciparum (isolate 3D7) OX=36329 GN=PF3D7_0419500 PE=4 SV=1	37C	1	1.02979	1.0039	1.00257	1.05176	1.02003	1.04323	1.10846	1.19466	1.20601	4	5	2	13.0231	0.961584	1.42713
C0H5C1	Uncharacterized protein OS=Plasmodium falciparum (isolate 3D7) OX=36329 GN=PF3D7_1317600 PE=4 SV=1	37C	1	0.980617	0.984434	0.969803	0.950019	0.985678	0.979074	0.931795	0.954358	0.902811	6	11	2	10.4204	0.645096	-0.314556
Q8IKQ9	Signal peptide peptidase OS=Plasmodium falciparum (isolate 3D7) OX=36329 GN=PF3D7_1457000 PE=3 SV=2	37C	1	1.17353	1.12231	1.18839	1.14092	1.00878	1.12017	1.05358	1.08601	1.1063	4	6	2	0.303647	0.127675	-2.06155
Q8IKR2	Uncharacterized protein OS=Plasmodium falciparum (isolate 3D7) OX=36329 GN=PF3D7_1456700 PE=4 SV=1	37C	1	1.12096	1.06742	1.11137	1.07044	1.01111	1.03887	0.967446	0.933546	0.89065	4	6	2	9.27818	0.773843	-0.770739
Q8IJB9	Partial CSTF domain-containing protein, putative OS=Plasmodium falciparum (isolate 3D7) OX=36329 GN=PF3D7_1028500 PE=4 SV=1	37C	1	0.989274	0.938323	0.936688	0.965669	1.0358	0.989274	1.06248	1.15666	1.25167	4	6	2	67.8516	0.927579	0.723943
C6KSZ7	Zinc finger protein, putative OS=Plasmodium falciparum (isolate 3D7) OX=36329 GN=PF3D7_0615600 PE=4 SV=1	37C	1	1.1318	1.0468	1.06527	1.09027	0.983743	1.00398	0.940435	0.901534	0.856055	8	8	2	6.2696	0.79937	-0.718287
A0A5K1K940	RNA-binding protein, putative OS=Plasmodium falciparum (isolate 3D7) OX=36329 GN=PF3D7_1326300 PE=4 SV=1	37C	1	0.965361	1.02568	0.96774	0.986475	0.981131	0.955006	0.938738	0.91137	0.939799	4	11	2	2.75575	0.703416	-1.30723
Q8I5U3	Uncharacterized protein OS=Plasmodium falciparum (isolate 3D7) OX=36329 GN=PF3D7_1210600 PE=4 SV=1	37C	1	0.997809	0.980744	0.970378	0.994317	0.986263	1.00029	1.04408	1.02409	1.06038	6	7	2	4.47415	0.820267	3.41249
Q8ILJ6	Uncharacterized protein OS=Plasmodium falciparum (isolate 3D7) OX=36329 GN=PF3D7_1426800 PE=4 SV=2	37C	1	1.1158	1.07485	1.0541	1.05395	1.02007	1.05206	1.02115	0.970179	0.951736	7	7	2	6.40656	0.578922	-0.753506
Q8II85	TFIIS central domain-containing protein, putative OS=Plasmodium falciparum (isolate 3D7) OX=36329 GN=PF3D7_1127800 PE=4 SV=1	37C	1	0.971118	0.952397	0.984736	0.991743	0.977896	0.96824	0.955774	0.965156	0.978242	5	6	2	1275.35	0.352504	0.0120815
Q8II99	WD repeat-containing protein, putative OS=Plasmodium falciparum (isolate 3D7) OX=36329 GN=PF3D7_1126500 PE=4 SV=1	37C	1	1.02867	1.05682	0.983261	1.0599	1.08209	1.02736	1.02763	1.04241	1.06946	3	3	2	0.0947789	0.245148	0.112523
Q8IJV0	Metalloprotease, putative OS=Plasmodium falciparum (isolate 3D7) OX=36329 GN=PF3D7_1009500 PE=4 SV=2	37C	1	0.958991	1.00643	0.939768	1.01807	0.977046	1.01582	0.990506	1.02711	1.04949	5	6	2	5.13833	0.409534	0.628144
O77318	PDZ domain-containing protein OS=Plasmodium falciparum (isolate 3D7) OX=36329 GN=PF3D7_0307800 PE=4 SV=1	37C	1	0.986899	0.987953	0.985076	1.02761	1.00203	0.995545	0.978071	0.985356	0.958227	4	5	2	11.2308	0.44189	-1.25282
Q8I1S5	Uncharacterized protein OS=Plasmodium falciparum (isolate 3D7) OX=36329 GN=PF3D7_0416200 PE=4 SV=1	37C	1	0.92853	0.991928	0.934103	0.948404	0.944017	0.913234	0.910338	0.894632	0.883648	4	5	2	3.61589	0.763653	-0.189962
Q8I2R3	Uncharacterized protein OS=Plasmodium falciparum (isolate 3D7) OX=36329 GN=PF3D7_0924400 PE=4 SV=1	37C	1	1.01063	1.02441	0.996394	1.07648	1.04836	1.04401	1.01173	1.06069	1.02555	4	5	2	2.27094	0.223876	0.11084
Q8IE75	Micro-fibrillar-associated protein, putative OS=Plasmodium falciparum (isolate 3D7) OX=36329 GN=PF3D7_1324200 PE=4 SV=2	37C	1	0.969961	0.966205	0.971778	0.954637	0.973499	0.965884	1.01106	0.992146	1.01996	5	6	2	6.54658	0.634384	8.01095
Q8IJQ2	SPRY domain-containing protein, putative OS=Plasmodium falciparum (isolate 3D7) OX=36329 GN=PF3D7_1014300 PE=4 SV=1	37C	1	0.974904	0.920921	0.929682	0.90998	0.970278	1.00309	0.957277	0.957245	0.97316	3	7	2	0.548028	0.175317	4.71438
C0H4A5	Armadillo-domain containing rhoptry protein OS=Plasmodium falciparum (isolate 3D7) OX=36329 GN=PF3D7_0414900 PE=4 SV=1	37C	1	1.01892	1.02891	0.991949	1.05076	0.994563	1.09176	1.07999	1.10899	1.11952	4	5	2	2.17672	0.834886	5.0786
Q8IKZ7	Calponin homology domain-containing protein, putative OS=Plasmodium falciparum (isolate 3D7) OX=36329 GN=PF3D7_1447800 PE=4 SV=1	37C	1	0.99591	0.979718	0.96131	0.984902	0.956584	1.04133	0.967589	0.992021	0.980803	6	6	2	4422.59	0.0411146	5.12432e-05
Q8I4T2	CSC1-like protein, putative OS=Plasmodium falciparum (isolate 3D7) OX=36329 GN=PF3D7_1250200 PE=4 SV=1	37C	1	0.925141	0.963533	0.89669	0.886908	0.910558	0.907954	0.969811	0.947152	0.93278	3	3	2	7687.4	0.416397	0.000105455
Q8IAN2	Filament assembling protein, putative OS=Plasmodium falciparum (isolate 3D7) OX=36329 GN=PF3D7_0803200 PE=3 SV=1	37C	1	0.947653	1.00612	0.965043	1.0061	0.983686	1.02446	0.988487	1.11891	1.09126	4	6	2	22.0101	0.81847	6.55619
Q8I3W5	Uncharacterized protein OS=Plasmodium falciparum (isolate 3D7) OX=36329 GN=PF3D7_0514200 PE=4 SV=1	37C	1	1.02878	0.984305	1.02045	1.02919	0.952493	0.972026	0.922039	0.954207	0.974003	4	7	2	0.427606	0.714753	-8.30261
Q8I316	Uncharacterized protein OS=Plasmodium falciparum (isolate 3D7) OX=36329 GN=PF3D7_0913600 PE=4 SV=1	37C	1	1.10731	1.07457	1.0948	1.10996	1.04224	1.13606	1.06531	1.04725	1.01353	8	8	2	209.135	0.243879	-1.03347
C6KSS7	Uncharacterized protein OS=Plasmodium falciparum (isolate 3D7) OX=36329 GN=PF3D7_0607900 PE=4 SV=1	37C	1	0.925674	0.951252	0.983721	0.978275	0.939624	0.974892	0.898397	0.908504	0.935887	2	3	2	0.592617	0.385807	-0.123913
Q8IBH0	Uncharacterized protein OS=Plasmodium falciparum (isolate 3D7) OX=36329 GN=PF3D7_0728800 PE=4 SV=1	37C	1	1.04043	1.01835	1.04383	1.01282	1.03058	1.04029	1.07796	1.01377	1.02648	4	5	2	0.154593	0.241675	0.0203568
Q8IK07	Uncharacterized protein OS=Plasmodium falciparum (isolate 3D7) OX=36329 GN=PF3D7_1002900 PE=4 SV=2	37C	1	1.04769	1.04007	1.04165	1.01854	1.01123	1.01849	1.09731	1.06687	1.09232	4	5	2	0.473284	0.431389	0.19832
Q8I6T6	Cytochrome c, putative OS=Plasmodium falciparum (isolate 3D7) OX=36329 GN=PF3D7_1311700 PE=3 SV=1	37C	1	0.978236	0.933806	0.969	0.960464	1.01786	0.93613	1.00368	1.05417	0.999111	4	5	2	11.6913	0.413407	3.75082
Q8III7	AP complex subunit sigma OS=Plasmodium falciparum (isolate 3D7) OX=36329 GN=PF3D7_1118100 PE=3 SV=1	37C	1	1.12751	1.05968	1.13735	1.15381	1.10164	1.08529	0.98026	0.954139	1.07766	2	3	2	4.66979	0.409093	-4.17184
Q8I554	Uncharacterized protein OS=Plasmodium falciparum (isolate 3D7) OX=36329 GN=PF3D7_1236900 PE=4 SV=2	37C	1	0.98726	0.985852	0.985665	1.00883	0.990879	0.963217	0.900231	0.890365	0.837556	4	5	2	12.4868	0.956602	-0.927783
Q8I434	Transcription factor 25, putative OS=Plasmodium falciparum (isolate 3D7) OX=36329 GN=PF3D7_0506800 PE=3 SV=1	37C	1	1.0238	1.0342	1.00136	1.02415	1.00295	1.03994	1.045	1.03008	1.06439	5	5	2	2.43741	0.491604	0.294001
C0H5C7	RNA-binding protein, putative OS=Plasmodium falciparum (isolate 3D7) OX=36329 GN=PF3D7_1320900 PE=1 SV=1	37C	1	0.974061	0.95515	0.968794	0.967027	0.948309	0.956179	0.944447	0.979579	0.972318	3	3	2		0.0249704	-4.14155e-05
Q8I3U8	RAP protein, putative OS=Plasmodium falciparum (isolate 3D7) OX=36329 GN=PF3D7_0516000 PE=4 SV=1	37C	1	0.939118	0.955749	0.942265	0.907817	0.943384	0.901813	0.939461	0.923469	0.968131	6	7	2		0.0642153	-0.000115444
A0A143ZZV5	Uncharacterized protein OS=Plasmodium falciparum (isolate 3D7) OX=36329 GN=PF3D7_0804500 PE=4 SV=1	37C	1	0.963076	0.998432	0.964712	0.940553	0.962347	0.979085	0.963345	1.0268	0.99469	6	11	2	22.577	0.425062	9.47657
C0H4N1	Uncharacterized protein OS=Plasmodium falciparum (isolate 3D7) OX=36329 GN=PF3D7_0717100 PE=4 SV=1	37C	1	0.977159	1.03693	1.02271	1.04879	1.02362	1.04883	1.01942	1.02313	1.0715	5	6	2	0.407639	0.390314	0.239711
Q8IBF8	AP complex subunit beta OS=Plasmodium falciparum (isolate 3D7) OX=36329 GN=PF3D7_0730200 PE=3 SV=2	37C	1	1.01994	1.06562	1.01406	1.02425	0.989849	1.01676	0.993813	0.919207	0.920557	3	3	2	5.70301	0.71468	-0.846615
Q8IC20	mRNA (guanine-N(7)-)-methyltransferase OS=Plasmodium falciparum (isolate 3D7) OX=36329 GN=PF3D7_0705000 PE=3 SV=1	37C	1	0.991717	1.03879	0.918453	1.03684	0.893685	0.969185	0.835905	0.97931	0.863951	4	7	2	0.408611	0.433635	-10.9903
Q8I328	Alkaline phosphatase, putative OS=Plasmodium falciparum (isolate 3D7) OX=36329 GN=PF3D7_0912400 PE=4 SV=1	37C	1	1.07023	1.03221	1.04179	1.04812	0.971593	1.03775	0.976892	0.962061	1.04558	4	4	2	0.368055	0.283834	-3.21672
A0A5K1K9F8	Uncharacterized protein OS=Plasmodium falciparum (isolate 3D7) OX=36329 GN=PF3D7_1349500 PE=4 SV=1	37C	1	0.998932	0.981606	1.03358	1.04596	1.04446	1.0203	1.05185	1.02029	1.15757	6	17	2	9.27978	0.512858	0.355879
Q8IBX7	Uncharacterized protein OS=Plasmodium falciparum (isolate 3D7) OX=36329 GN=PF3D7_0711300 PE=4 SV=1	37C	1	0.966113	0.994732	0.951688	0.984976	1.02416	1.04488	1.04393	1.08317	1.02275	2	8	2	0.607066	0.755332	1.95182
Q8IKE0	Mediator of RNA polymerase II transcription subunit 6 OS=Plasmodium falciparum (isolate 3D7) OX=36329 GN=MED6 PE=3 SV=1	37C	1	1.0784	1.03439	0.98269	1.01683	0.985404	0.942919	0.986896	0.97632	0.961506	4	8	2	0.130276	0.542862	-0.901517
Q8IIL9	GTPase-activating protein, putative OS=Plasmodium falciparum (isolate 3D7) OX=36329 GN=PF3D7_1114200 PE=4 SV=2	37C	1	1.01243	1.00362	0.968391	1.04294	0.996839	1.00179	1.02891	1.00368	1.03499	3	4	2	0.377468	0.130975	0.42474
Q8IHZ2	CLPTM1 domain-containing protein, putative OS=Plasmodium falciparum (isolate 3D7) OX=36329 GN=PF3D7_1137300 PE=3 SV=1	37C	1	1.14192	1.07216	1.15233	1.13514	1.0157	1.12892	1.06527	1.12079	1.03404	3	3	2	252.149	0.103751	-2.81954
Q7KQL7	Acyl-CoA synthetase OS=Plasmodium falciparum (isolate 3D7) OX=36329 GN=PF3D7_1479000 PE=4 SV=1	37C	1	1.07807	1.002	1.02559	1.0691	0.970364	1.00869	0.886389	0.871502	0.854103	1	3	2	6.55552	0.844179	-2.6047
Q8IJG3	RNA-binding protein, putative OS=Plasmodium falciparum (isolate 3D7) OX=36329 GN=PF3D7_1024200 PE=4 SV=1	37C	1	0.993181	0.984984	1.08935	0.969297	1.02634	1.06581	1.14047	1.12016	1.13421	1	2	2	3.26558	0.757656	2.44208
Q9U0H5	Uncharacterized protein OS=Plasmodium falciparum (isolate 3D7) OX=36329 GN=PF3D7_0411300 PE=3 SV=1	37C	1	1.01405	0.981443	0.95893	0.992921	0.993169	0.966888	0.923704	0.922351	0.927393	7	8	2	3.76807	0.830575	-3.25051
Q8IC38	Uncharacterized protein OS=Plasmodium falciparum (isolate 3D7) OX=36329 GN=PF3D7_0703200 PE=4 SV=1	37C	1	0.988614	0.9826	0.95002	0.984075	0.974398	0.956899	0.982396	0.960454	1.01536	6	6	2	108.677	0.397365	9.2758
Q8ILM0	Peptidyl-prolyl cis-trans isomerase OS=Plasmodium falciparum (isolate 3D7) OX=36329 GN=PF3D7_1423200 PE=4 SV=2	37C	1	1.00181	0.933588	1.01976	0.958354	0.994412	0.930597	0.996352	0.9445	1.05145	8	9	2	229.499	0.363575	5.0018
C6KSY5	Pre-mRNA-splicing factor CWF7, putative OS=Plasmodium falciparum (isolate 3D7) OX=36329 GN=PF3D7_0614400 PE=4 SV=1	37C	1	1.05504	1.05	1.06347	1.12947	1.08583	1.04626	1.10072	1.08969	1.13765	3	3	2	0.0368949	0.613932	0.154164
Q8IKL7	Splicing factor 3B subunit 2, putative OS=Plasmodium falciparum (isolate 3D7) OX=36329 GN=PF3D7_1461600 PE=4 SV=1	37C	1	0.971776	0.966636	0.950628	1.00595	0.972523	0.961868	1.04253	1.02579	1.04074	4	4	2	6.17596	0.7483	10.1365
O96258	40S ribosomal protein S26 OS=Plasmodium falciparum (isolate 3D7) OX=36329 GN=PF3D7_0217800 PE=1 SV=1	37C	1	0.994119	1.01119	0.980576	1.02986	1.0327	1.08068	1.1663	1.29689	1.18565	3	6	2	5.26377	0.908147	1.39168
Q8I5I0	Vacuolar iron transporter OS=Plasmodium falciparum (isolate 3D7) OX=36329 GN=PF3D7_1223700 PE=3 SV=1	37C	1	1.08235	1.00247	1.1092	1.12241	0.996689	1.0011	1.03178	1.00546	0.982517	2	3	2	0.461781	0.370124	-5.86246
O77357	Uncharacterized protein OS=Plasmodium falciparum (isolate 3D7) OX=36329 GN=PF3D7_0310900 PE=4 SV=1	37C	1	0.939821	0.975505	0.957067	0.998806	0.980495	0.962943	0.947607	0.989618	0.992056	6	6	2	4.22618	0.0185507	0.520195
Q8I1X1	Lysine decarboxylase, putative OS=Plasmodium falciparum (isolate 3D7) OX=36329 GN=PF3D7_0405700 PE=4 SV=1	37C	1	0.890652	0.991553	0.916178	0.934258	0.946771	0.966767	1.01112	0.919763	1.0554	4	4	2	3.26627	0.202715	2.87398
O77325	Pre-mRNA-processing factor 19 OS=Plasmodium falciparum (isolate 3D7) OX=36329 GN=PF3D7_0308600 PE=3 SV=1	37C	1	0.997536	1.02219	0.999521	1.02844	1.02917	1.06201	1.07505	1.09465	1.17573	5	8	2	18.6956	0.924896	0.559606
Q8IJK6	PH domain-containing protein OS=Plasmodium falciparum (isolate 3D7) OX=36329 GN=PF3D7_1019600 PE=4 SV=2	37C	1	0.967749	0.992751	0.969647	1.01218	0.964335	0.993285	0.988558	0.994707	0.974848	4	4	2	171643	0.099194	2.65147e-05
A0A144A0T0	F-box only protein 9 homolog, putative OS=Plasmodium falciparum (isolate 3D7) OX=36329 GN=PF3D7_1247000.2 PE=4 SV=1	37C	1	0.94889	0.994002	0.960428	1.00572	0.977941	0.958737	0.98213	1.00113	1.03025	3	3	2	15.7634	0.391975	8.79641
Q7YTF7	Protein kinase 7 OS=Plasmodium falciparum (isolate 3D7) OX=36329 GN=PF3D7_0213400 PE=1 SV=1	37C	1	0.971844	0.934582	0.89799	0.975091	0.950718	0.956818	0.93383	0.947809	0.841317	3	3	2	10.9634	0.393999	-0.15012
Q8I3S7	Protein AMR2 OS=Plasmodium falciparum (isolate 3D7) OX=36329 GN=PF3D7_0518100 PE=4 SV=1	37C	1	0.947087	0.972849	0.956028	0.977784	0.992077	1.00547	1.11297	1.11688	1.23516	4	8	2	71.3245	0.940243	0.584232
C0H4W5	Protein kinase 1 OS=Plasmodium falciparum (isolate 3D7) OX=36329 GN=PF3D7_0821100 PE=4 SV=2	37C	1	0.968675	0.970343	0.999531	0.951471	0.991705	0.948222	0.918318	0.830257	0.843211	4	5	2	13.2393	0.917377	-1.64136
A0A144A1B9	CG2-related protein, putative OS=Plasmodium falciparum (isolate 3D7) OX=36329 GN=PF3D7_1232500 PE=4 SV=1	37C	1	0.965418	0.98437	0.960424	0.975937	0.974344	1.02535	1.00232	0.989183	1.03594	7	7	2	1.40562	0.572295	6.03659
C6KSN1	RNA-binding protein, putative OS=Plasmodium falciparum (isolate 3D7) OX=36329 GN=PF3D7_0603100 PE=3 SV=1	37C	1	1.02177	1.14431	1.03797	1.029	0.998933	1.01429	1.04524	0.9797	1.00717	5	8	2	0.156366	0.210899	-2.04726
C0H5C6	SNARE protein, putative OS=Plasmodium falciparum (isolate 3D7) OX=36329 GN=PF3D7_1320500 PE=4 SV=1	37C	1	1.03126	0.95372	0.917094	1.0058	0.963874	0.945549	0.956364	0.920131	0.891356	4	4	2	0.700475	0.475556	-0.273252
Q8I660	RING zinc finger protein, putative OS=Plasmodium falciparum (isolate 3D7) OX=36329 GN=PF3D7_0215100 PE=4 SV=2	37C	1	0.978722	0.944696	0.96131	0.978114	0.962764	0.995305	1.03787	1.02261	0.966466	4	5	2	2.69895	0.39324	3.97333
Q8IIH6	tRNA (guanine(9)-N(1))-methyltransferase OS=Plasmodium falciparum (isolate 3D7) OX=36329 GN=PF3D7_1119100 PE=4 SV=1	37C	1	0.986549	0.982486	1.02044	0.999768	1.04974	0.993005	1.04394	1.06032	1.11508	4	5	2	31.9772	0.766135	0.826214
Q8IM65	Zinc finger protein, putative OS=Plasmodium falciparum (isolate 3D7) OX=36329 GN=PF3D7_1402400 PE=4 SV=1	37C	1	0.946761	0.951014	0.902683	0.984068	0.896429	1.01612	1.01076	1.11766	1.00807	3	5	2	2.71846	0.555395	6.09856
Q8IKZ8	Uncharacterized protein OS=Plasmodium falciparum (isolate 3D7) OX=36329 GN=PF3D7_1447700 PE=4 SV=1	37C	1	0.971472	1.0114	0.991764	1.03262	0.95013	0.978354	0.908473	0.822913	0.774105	4	4	2	22.4502	0.938922	-1.01199
Q8IBD0	CRA domain-containing protein, putative OS=Plasmodium falciparum (isolate 3D7) OX=36329 GN=PF3D7_0830400 PE=4 SV=1	37C	1	1.05082	1.08706	1.07772	1.08923	1.05469	1.11255	1.04906	1.09666	1.06339	3	4	2		0.000432814	-1.05769e-05
O77380	CPSF (Cleavage and polyadenylation specific factor), subunit A, putative OS=Plasmodium falciparum (isolate 3D7) OX=36329 GN=PF3D7_0317700 PE=3 SV=2	37C	1	1.08058	1.03335	1.15234	1.06797	1.0163	0.988382	0.707679	0.672861	0.602035	4	12	2	6.32524	0.949863	-2.05219
[truncated: 9,324 more rows]

## Sheet: live cells
id	description	condition	0 µM	0.00152 µM	0.0061 µM	0.024 µM	0.097 µM	0.39 µM	1.56 µM	6.25 µM	25 µM	100 µM	sumUniPeps	sumPSMs	countNum	EC50	R2	Slope
[truncated: 7,027 more rows]
