# Supplementary material for: Genetic validation of PfFKBP35 as an antimalarial drug target
Source: bioRxiv preprint, doi:10.1101/2022.12.09.519720, version 4 (2023-08-19)
Supplement: Mass spectrometry data comparing the proteomes of FKBP35 KO and FKBP35 WT parasites [file 519720_file02.xlsx]

## Sheet: schizont G1
proteinName	ac	geneName	proteinDescription	idScore	idQValue	nbPeptides	allAccessions	DMSO_rep1	DMSO_rep2	DMSO_rep3	rapa_rep1	rapa_rep2	rapa_rep3	medianInt_DMSO_T1	medianInt_rapa_T1	cv_DMSO_T1	cv_rapa_T1	log2ratio_rapa_T1	fracNAFeatures.DMSO_T1	fracNAFeatures.rapa_T1	FTestPValue
tr|Q8I4V8|Q8I4V8_PLAF7	Q8I4V8	PF3D7_1247400	Peptidylprolyl isomerase OS=Plasmodium falciparum (isolate 3D7) OX=36329 GN=PF3D7_1247400 PE=1 SV=1	910.21	0	19	tr|Q8I4V8|Q8I4V8_PLAF7	1.1743e+08	1.32447e+08	1.38158e+08	9.43636e+06	5.94514e+06	6.2098e+06	1.32447e+08	6.2098e+06	0.0827729	0.270076	-4.41472	0.0119048	0.130952	7.59143e-07
sp|P42212|GFP-AEQVI	P42212	GFP	Green fluorescent protein OS=Aequorea victoria GN=GFP PE=1 SV=1	637.91	0	12	sp|P42212|GFP-AEQVI	1.72457e+06	616220	747953	6.7838e+07	6.4421e+07	8.02294e+07	747953	6.7838e+07	0.588076	0.117436	6.503	0.0555556	0	3.33911e-06
tr|Q8IDN9|Q8IDN9_PLAF7	Q8IDN9	PF3D7_1345800	Uncharacterized protein OS=Plasmodium falciparum (isolate 3D7) OX=36329 GN=PF3D7_1345800 PE=4 SV=1	109.91	0	4	tr|Q8IDN9|Q8IDN9_PLAF7	1.84308e+06	2.04548e+06	2.14721e+06	982765	954656	1.10037e+06	2.04548e+06	982765	0.07695	0.0763393	-1.05752	0	0	0.000145844
tr|Q8IEH3|Q8IEH3_PLAF7	Q8IEH3	PF3D7_1314100	Uncharacterized protein OS=Plasmodium falciparum (isolate 3D7) OX=36329 GN=PF3D7_1314100 PE=4 SV=1	129.42	0	4	tr|Q8IEH3|Q8IEH3_PLAF7	821885	693919	731924	353685	404996	458670	731924	404996	0.0877117	0.129371	-0.853787	0	0.0666667	0.000691151
tr|Q8IEJ6|Q8IEJ6_PLAF7	Q8IEJ6	PF3D7_1312600	2-oxoisovalerate dehydrogenase subunit alpha OS=Plasmodium falciparum (isolate 3D7) OX=36329 GN=PF3D7_1312600 PE=3 SV=1	134.53	0	4	tr|Q8IEJ6|Q8IEJ6_PLAF7	435352	456547	440882	633618	643461	577580	440882	633618	0.024747	0.0574833	0.523221	0	0	0.00333946
tr|O96198|O96198_PLAF7	O96198	PF3D7_0211800	Asparagine--tRNA ligase OS=Plasmodium falciparum (isolate 3D7) OX=36329 GN=PF3D7_0211800 PE=3 SV=1	1315.05	0	24	tr|O96198|O96198_PLAF7	6.13088e+07	6.07181e+07	6.08907e+07	4.16976e+07	4.28988e+07	4.76547e+07	6.08907e+07	4.28988e+07	0.00498144	0.0714634	-0.505284	0.0263158	0.0350877	0.00389049
tr|O96252|O96252_PLAF7	O96252	PF3D7_0217100	ATP synthase subunit alpha OS=Plasmodium falciparum (isolate 3D7) OX=36329 GN=PF3D7_0217100 PE=3 SV=1	291.39	0	7	tr|O96252|O96252_PLAF7	1.24068e+06	1.26971e+06	1.17525e+06	1.59034e+06	1.69327e+06	1.57658e+06	1.24068e+06	1.59034e+06	0.0393826	0.0393637	0.358198	0	0	0.00694388
tr|Q8IE26|Q8IE26_PLAF7	Q8IE26	PF3D7_1330000.1	Thioredoxin, putative OS=Plasmodium falciparum (isolate 3D7) OX=36329 GN=PF3D7_1330000.1 PE=4 SV=1	71.53	0.000854701	1	tr|Q8IE26|Q8IE26_PLAF7	506086	377219	403194	182792	303462	229622	403194	229622	0.158924	0.254946	-0.812212	0	0	0.00768734
tr|Q8I581|Q8I581_PLAF7	Q8I581	PF3D7_1234100	Bromodomain protein, putative OS=Plasmodium falciparum (isolate 3D7) OX=36329 GN=PF3D7_1234100 PE=4 SV=1	40.66	0.00359454	2	tr|Q8I581|Q8I581_PLAF7	3.07513e+06	2.72963e+06	2.68981e+06	2.19764e+06	2.08678e+06	1.82975e+06	2.72963e+06	2.08678e+06	0.0748397	0.0926003	-0.387427	0	0	0.00802679
tr|Q8II69|Q8II69_PLAF7	Q8II69	PF3D7_1129400	RNA methyltransferase, putative OS=Plasmodium falciparum (isolate 3D7) OX=36329 GN=PF3D7_1129400 PE=3 SV=1	230.86	0	7	tr|Q8II69|Q8II69_PLAF7	5.70755e+06	5.7057e+06	5.46263e+06	7.48183e+06	7.08263e+06	7.08601e+06	5.7057e+06	7.08601e+06	0.025043	0.0318019	0.312569	0.037037	0.037037	0.00954413
tr|C6KTC1|C6KTC1_PLAF7	C6KTC1	PF3D7_0628600	SANT_DAMP1_like domain-containing protein OS=Plasmodium falciparum (isolate 3D7) OX=36329 GN=PF3D7_0628600 PE=4 SV=1	49.47	0	3	tr|C6KTC1|C6KTC1_PLAF7	351881	326101	419204	457092	652555	604635	351881	604635	0.13144	0.178282	0.780976	0	0.111111	0.011956
tr|Q8IHV2|Q8IHV2_PLAF7	Q8IHV2	PF3D7_1141300	Uncharacterized protein OS=Plasmodium falciparum (isolate 3D7) OX=36329 GN=PF3D7_1141300 PE=4 SV=1	54.09	0.000788022	3	tr|Q8IHV2|Q8IHV2_PLAF7	338119	339821	315536	446498	464825	396028	338119	446498	0.0409362	0.0817556	0.40112	0	0.111111	0.0122676
tr|Q8I638|Q8I638_PLAF7	Q8I638	PF3D7_1200700	Acyl-CoA synthetase OS=Plasmodium falciparum (isolate 3D7) OX=36329 GN=PF3D7_1200700 PE=4 SV=1	320.37	0	8	tr|Q8I638|Q8I638_PLAF7	3.86111e+06	3.70405e+06	3.4717e+06	5.0114e+06	4.42716e+06	4.91602e+06	3.70405e+06	4.91602e+06	0.0532532	0.0655045	0.40839	0	0.0333333	0.0130362
tr|Q8I239|Q8I239_PLAF7	Q8I239	PF3D7_0110600	Phosphatidylinositol-4-phosphate 5-kinase OS=Plasmodium falciparum (isolate 3D7) OX=36329 GN=PF3D7_0110600 PE=4 SV=1	49.61	0.000768049	1	tr|Q8I239|Q8I239_PLAF7	62265.4	75665.9	99042.9	123343	112871	132539	75665.9	123343	0.235632	0.0800629	0.70496	0	0	0.0130896
tr|Q8IKH0|Q8IKH0_PLAF7	Q8IKH0	PF3D7_1466700	60S ribosome subunit biogenesis protein NIP7 homolog OS=Plasmodium falciparum (isolate 3D7) OX=36329 GN=PF3D7_1466700 PE=3 SV=2	113.11	0	2	tr|Q8IKH0|Q8IKH0_PLAF7	1.30192e+06	1.69463e+06	1.36369e+06	1.93615e+06	2.02144e+06	1.99273e+06	1.36369e+06	1.99273e+06	0.145294	0.0218798	0.547232	0	0	0.0136901
tr|Q9NLB8|Q9NLB8_PLAF7	Q9NLB8	PF3D7_0304200	EH domain-containing protein OS=Plasmodium falciparum (isolate 3D7) OX=36329 GN=PF3D7_0304200 PE=3 SV=1	227.8	0	6	tr|Q9NLB8|Q9NLB8_PLAF7	2.28152e+06	2.81321e+06	2.6415e+06	3.44159e+06	3.38696e+06	3.3607e+06	2.6415e+06	3.38696e+06	0.105222	0.012151	0.358635	0.0416667	0	0.0139293
tr|Q8I5M9|Q8I5M9_PLAF7	Q8I5M9	PF3D7_1217900	PPPDE peptidase domain-containing protein,putative OS=Plasmodium falciparum (isolate 3D7) OX=36329 GN=PF3D7_1217900 PE=4 SV=1	51.6	0.000777001	2	tr|Q8I5M9|Q8I5M9_PLAF7	725289	404663	407320	206300	288345	294847	407320	288345	0.359763	0.187537	-0.498366	0.166667	0	0.0161115
tr|Q8IK92|Q8IK92_PLAF7	Q8IK92	PF3D7_1474600	Uncharacterized protein OS=Plasmodium falciparum (isolate 3D7) OX=36329 GN=PF3D7_1474600 PE=4 SV=1	110.52	0	3	tr|Q8IK92|Q8IK92_PLAF7	2.57529e+06	2.3355e+06	2.59527e+06	3.49693e+06	3.15838e+06	3.03729e+06	2.57529e+06	3.15838e+06	0.0577752	0.0737386	0.294446	0	0	0.0164236
tr|Q8I603|Q8I603_PLAF7	Q8I603	PF3D7_1204300	Eukaryotic translation initiation factor 5A OS=Plasmodium falciparum (isolate 3D7) OX=36329 GN=PF3D7_1204300 PE=3 SV=1	683.53	0	12	tr|Q8I603|Q8I603_PLAF7	2.8071e+08	2.59127e+08	2.31136e+08	2.08595e+08	1.92074e+08	1.75249e+08	2.59127e+08	1.92074e+08	0.0967181	0.0868514	-0.431999	0.05	0.0666667	0.0165048
tr|Q8I6T0|Q8I6T0_PLAF7	Q8I6T0	PF3D7_1365500	Aminomethyltransferase, mitochondrial, putative OS=Plasmodium falciparum (isolate 3D7) OX=36329 GN=PF3D7_1365500 PE=4 SV=1	106.71	0	4	tr|Q8I6T0|Q8I6T0_PLAF7	868037	1.02452e+06	1.28188e+06	1.70409e+06	1.482e+06	1.45414e+06	1.02452e+06	1.482e+06	0.197478	0.0885585	0.532597	0	0	0.0166123
tr|O96254|O96254_PLAF7	O96254	PF3D7_0217300	AP complex subunit sigma OS=Plasmodium falciparum (isolate 3D7) OX=36329 GN=PF3D7_0217300 PE=3 SV=1	48.54	0.00075815	1	tr|O96254|O96254_PLAF7	69770.2	49048.2	86833.5	103023	106581	122560	69770.2	106581	0.276032	0.0939817	0.611267	0	0	0.0174954
tr|Q76NN6|Q76NN6_PLAF7	Q76NN6	PF3D7_0419600	Ran binding protein 1, putative OS=Plasmodium falciparum (isolate 3D7) OX=36329 GN=PF3D7_0419600 PE=4 SV=1	913.3	0	18	tr|Q76NN6|Q76NN6_PLAF7	1.33654e+08	1.31912e+08	1.416e+08	9.85832e+07	1.11182e+08	1.12157e+08	1.33654e+08	1.11182e+08	0.0380523	0.0705545	-0.265588	0	0	0.0190598
tr|Q8IJC1|Q8IJC1_PLAF7	Q8IJC1	PF3D7_1028300	rRNA-processing protein EBP2, putative OS=Plasmodium falciparum (isolate 3D7) OX=36329 GN=PF3D7_1028300 PE=4 SV=1	69.02	0.000841043	3	tr|Q8IJC1|Q8IJC1_PLAF7	567862	470880	498361	749551	618400	673833	498361	673833	0.0975578	0.096734	0.435199	0	0	0.0197188
tr|Q8IB14|Q8IB14_PLAF7	Q8IB14	PF3D7_0817900	High mobility group protein B2 OS=Plasmodium falciparum (isolate 3D7) OX=36329 GN=PF3D7_0817900 PE=1 SV=1	383.96	0	8	tr|Q8IB14|Q8IB14_PLAF7	1.10989e+08	1.0997e+08	1.08478e+08	7.80251e+07	9.25093e+07	8.93015e+07	1.0997e+08	8.93015e+07	0.0114985	0.0878336	-0.300353	0	0	0.0202095
tr|Q8IJN3|Q8IJN3_PLAF7	Q8IJN3	PF3D7_1016400	Serine/threonine protein kinase, FIKK family OS=Plasmodium falciparum (isolate 3D7) OX=36329 GN=PF3D7_1016400 PE=4 SV=2	53.96	0.000786782	1	tr|Q8IJN3|Q8IJN3_PLAF7	71768.4	134391	132138	314956	200146	170208	132138	200146	0.315013	0.334483	0.599005	0	0	0.0224426
tr|A0A143ZZU2|A0A143ZZU2_PLAF7	A0A143ZZU2	PF3D7_1021400	Transmembrane 9 superfamily member OS=Plasmodium falciparum (isolate 3D7) OX=36329 GN=PF3D7_1021400 PE=3 SV=1	81.98	0	2	tr|A0A143ZZU2|A0A143ZZU2_PLAF7	960557	1.52446e+06	1.32469e+06	2.24262e+06	1.77505e+06	1.76552e+06	1.32469e+06	1.77505e+06	0.225147	0.141486	0.422205	0	0	0.0238051
tr|Q8ILZ9|Q8ILZ9_PLAF7	Q8ILZ9	PF3D7_1409600	Uncharacterized protein OS=Plasmodium falciparum (isolate 3D7) OX=36329 GN=PF3D7_1409600 PE=4 SV=1	214.27	0	6	tr|Q8ILZ9|Q8ILZ9_PLAF7	655395	797997	776418	1.09086e+06	900009	953498	776418	953498	0.103412	0.100309	0.296397	0.0952381	0	0.0243552
tr|Q8IBC3|Q8IBC3_PLAF7	Q8IBC3	PF3D7_0829200	Prohibitin, putative OS=Plasmodium falciparum (isolate 3D7) OX=36329 GN=PF3D7_0829200 PE=4 SV=1	153.83	0	5	tr|Q8IBC3|Q8IBC3_PLAF7	8.72963e+06	7.76506e+06	7.68992e+06	1.04442e+07	9.38265e+06	1.07487e+07	7.76506e+06	1.04442e+07	0.0719222	0.0703637	0.427633	0	0	0.0253074
tr|Q8I1P2|Q8I1P2_PLAF7	Q8I1P2	PF3D7_0419500	Uncharacterized protein OS=Plasmodium falciparum (isolate 3D7) OX=36329 GN=PF3D7_0419500 PE=4 SV=1	31.87	0.0094086	1	tr|Q8I1P2|Q8I1P2_PLAF7	33255.9	27642.4	37144.7	58083.2	39135	48228.4	33255.9	48228.4	0.146175	0.195466	0.536273	0	0	0.0258321
tr|A0A143ZVW7|A0A143ZVW7_PLAF7	A0A143ZVW7	PF3D7_0704300	Uncharacterized protein OS=Plasmodium falciparum (isolate 3D7) OX=36329 GN=PF3D7_0704300 PE=4 SV=1	160.47	0	6	tr|A0A143ZVW7|A0A143ZVW7_PLAF7	1.11456e+06	711253	720976	505604	612124	543817	720976	543817	0.271038	0.0974344	-0.40683	0.142857	0	0.0289363
tr|Q8I616|Q8I616_PLAF7	Q8I616	PF3D7_1202900	High mobility group protein B1 OS=Plasmodium falciparum (isolate 3D7) OX=36329 GN=PF3D7_1202900 PE=4 SV=1	325.97	0	10	tr|Q8I616|Q8I616_PLAF7	4.78728e+07	4.50244e+07	4.66649e+07	3.0738e+07	4.00606e+07	3.76037e+07	4.66649e+07	3.76037e+07	0.0307322	0.133723	-0.311463	0.0512821	0.025641	0.0306883
tr|Q8ID37|Q8ID37_PLAF7	Q8ID37	PF3D7_1367100	U1 small nuclear ribonucleoprotein, putative OS=Plasmodium falciparum (isolate 3D7) OX=36329 GN=PF3D7_1367100 PE=4 SV=1	170.63	0	7	tr|Q8ID37|Q8ID37_PLAF7	1.49187e+06	1.72787e+06	1.55006e+06	1.97748e+06	2.07791e+06	1.86607e+06	1.55006e+06	1.97748e+06	0.0773283	0.0536875	0.351346	0.190476	0.142857	0.0307019
tr|Q7KQK6|Q7KQK6_PLAF7	Q7KQK6	PF3D7_1117700	GTP-binding nuclear protein OS=Plasmodium falciparum (isolate 3D7) OX=36329 GN=PF3D7_1117700 PE=3 SV=1	1385.58	0	22	tr|Q7KQK6|Q7KQK6_PLAF7	6.6436e+08	6.23647e+08	6.56153e+08	5.62306e+08	5.25858e+08	5.11564e+08	6.56153e+08	5.25858e+08	0.0332242	0.0490674	-0.319359	0.00900901	0	0.0307411
tr|A0A144A431|A0A144A431_PLAF7	A0A144A431	PF3D7_1427900	Uncharacterized protein OS=Plasmodium falciparum (isolate 3D7) OX=36329 GN=PF3D7_1427900 PE=4 SV=1	1175.92	0	21	tr|A0A144A431|A0A144A431_PLAF7	2.11125e+08	1.93524e+08	1.86297e+08	1.58251e+08	1.70027e+08	1.55034e+08	1.93524e+08	1.58251e+08	0.0648298	0.0489945	-0.290298	0.0277778	0.037037	0.035265
tr|Q8IM36|Q8IM36_PLAF7	Q8IM36	PF3D7_1405800	Ribosome biogenesis protein BOP1 homolog OS=Plasmodium falciparum (isolate 3D7) OX=36329 GN=PF3D7_1405800 PE=3 SV=1	194.58	0	7	tr|Q8IM36|Q8IM36_PLAF7	4.05565e+06	4.82708e+06	4.50068e+06	5.48636e+06	5.3173e+06	5.63657e+06	4.50068e+06	5.48636e+06	0.0868017	0.0291471	0.285707	0	0	0.0356185
tr|Q8I2S9|Q8I2S9_PLAF7	Q8I2S9	PF3D7_0922700	Pre-mRNA-splicing factor 18, putative OS=Plasmodium falciparum (isolate 3D7) OX=36329 GN=PF3D7_0922700 PE=4 SV=1	124.52	0	1	tr|Q8I2S9|Q8I2S9_PLAF7	481659	732392	820144	974273	982873	980383	732392	980383	0.259062	0.0045193	0.42073	0.166667	0.333333	0.035968
tr|Q8IBI5|Q8IBI5_PLAF7	Q8IBI5	PF3D7_0727200	Cysteine desulfurase, putative OS=Plasmodium falciparum (isolate 3D7) OX=36329 GN=PF3D7_0727200 PE=3 SV=1	69.67	0.000844595	3	tr|Q8IBI5|Q8IBI5_PLAF7	340924	357782	336293	432960	390909	429063	340924	429063	0.0327811	0.055633	0.331739	0	0	0.0359962
tr|Q8IK49|Q8IK49_PLAF7	Q8IK49	PF3D7_1478600	EMP1-trafficking protein OS=Plasmodium falciparum (isolate 3D7) OX=36329 GN=PF3D7_1478600 PE=4 SV=1	52.47	0.000781861	2	tr|Q8IK49|Q8IK49_PLAF7	204201	398953	208987	666595	468822	362356	208987	468822	0.410339	0.309231	1.16563	0.166667	0	0.0371727
tr|Q8I461|Q8I461_PLAF7	Q8I461	PF3D7_0504000	Cation transporting P-ATPase OS=Plasmodium falciparum (isolate 3D7) OX=36329 GN=PF3D7_0504000 PE=4 SV=1	83.37	0	2	tr|Q8I461|Q8I461_PLAF7	436374	339917	390462	554753	506455	451019	390462	506455	0.124054	0.102976	0.375253	0	0.111111	0.0390641
tr|A0A143ZY93|A0A143ZY93_PLAF7	A0A143ZY93	PF3D7_0805600	PAP2-like protein, putative OS=Plasmodium falciparum (isolate 3D7) OX=36329 GN=PF3D7_0805600 PE=4 SV=1	35.07	0.00621118	1	tr|A0A143ZY93|A0A143ZY93_PLAF7	341959	507650	437214	656614	515816	599752	437214	599752	0.193861	0.119906	0.456026	0	0	0.0410485
tr|Q8II59|Q8II59_PLAF7	Q8II59	PF3D7_1130500	Uncharacterized protein OS=Plasmodium falciparum (isolate 3D7) OX=36329 GN=PF3D7_1130500 PE=4 SV=1	70.26	0.000847458	2	tr|Q8II59|Q8II59_PLAF7	19838.3	20600.4	27935.9	27987.1	30011.9	39122.4	20600.4	30011.9	0.196188	0.183218	0.542858	0.333333	0	0.0415188
tr|Q8IEC2|Q8IEC2_PLAF7	Q8IEC2	PF3D7_1319400	Uncharacterized protein OS=Plasmodium falciparum (isolate 3D7) OX=36329 GN=PF3D7_1319400 PE=4 SV=1	57.39	0.000803859	3	tr|Q8IEC2|Q8IEC2_PLAF7	784242	753914	765042	991803	979119	844747	765042	979119	0.019984	0.0868231	0.355944	0	0	0.0415845
tr|Q8IDF8|Q8IDF8_PLAF7	Q8IDF8	PF3D7_1354300	Putative rRNA methyltransferase OS=Plasmodium falciparum (isolate 3D7) OX=36329 GN=PF3D7_1354300 PE=3 SV=1	208.12	0	7	tr|Q8IDF8|Q8IDF8_PLAF7	1.40198e+06	1.57365e+06	1.6195e+06	1.78653e+06	1.88613e+06	1.88076e+06	1.57365e+06	1.88076e+06	0.074859	0.0302631	0.257198	0.0833333	0.0416667	0.0427151
tr|O96265|O96265_PLAF7	O96265	PF3D7_0218500	Small nuclear ribonucleoprotein Sm D2 OS=Plasmodium falciparum (isolate 3D7) OX=36329 GN=PF3D7_0218500 PE=3 SV=1	154.96	0	3	tr|O96265|O96265_PLAF7	4.43882e+06	6.45127e+06	5.96059e+06	8.49407e+06	7.022e+06	7.2503e+06	5.96059e+06	7.2503e+06	0.186816	0.104399	0.282586	0.2	0.266667	0.0437945
tr|Q8IK82|Q8IK82_PLAF7	Q8IK82	PF3D7_1475600	Bromodomain protein, putative OS=Plasmodium falciparum (isolate 3D7) OX=36329 GN=PF3D7_1475600 PE=1 SV=1	37.19	0.00491573	1	tr|Q8IK82|Q8IK82_PLAF7	101812	234352	198231	260553	317737	309882	198231	309882	0.38465	0.1047	0.644533	0	0	0.0438999
tr|Q8IDW8|Q8IDW8_PLAF7	Q8IDW8	PF3D7_1336300	Uncharacterized protein OS=Plasmodium falciparum (isolate 3D7) OX=36329 GN=PF3D7_1336300 PE=4 SV=1	34.58	0.00687285	1	tr|Q8IDW8|Q8IDW8_PLAF7	262141	179360	168440	135327	159831	96950.6	179360	135327	0.252014	0.242492	-0.406411	0	0	0.0449115
tr|C0H4A8|C0H4A8_PLAF7	C0H4A8	PF3D7_0416700	CDGSH iron-sulfur domain-containing protein,putative OS=Plasmodium falciparum (isolate 3D7) OX=36329 GN=PF3D7_0416700 PE=4 SV=1	50.28	0.000772201	2	tr|C0H4A8|C0H4A8_PLAF7	193107	372572	280111	406451	488096	386156	280111	406451	0.318328	0.126399	0.537082	0	0	0.0450821
tr|O77375|O77375_PLAF7	O77375	PF3D7_0318200	DNA-directed RNA polymerase subunit OS=Plasmodium falciparum (isolate 3D7) OX=36329 GN=PF3D7_0318200 PE=3 SV=1	731.73	0	23	tr|O77375|O77375_PLAF7	9.47689e+06	1.02638e+07	1.02642e+07	1.16367e+07	1.16347e+07	1.25323e+07	1.02638e+07	1.16367e+07	0.0454348	0.0433732	0.181116	0.0138889	0	0.0456169
tr|A0A144A3H8|A0A144A3H8_PLAF7	A0A144A3H8	PF3D7_1435700.2	Ataxin-2 like protein, putative OS=Plasmodium falciparum (isolate 3D7) OX=36329 GN=PF3D7_1435700.2 PE=4 SV=1	40.08	0.00358166	2	tr|A0A144A3H8|A0A144A3H8_PLAF7	1.33012e+06	1.71699e+06	1.40327e+06	1.64514e+06	2.15815e+06	2.13614e+06	1.40327e+06	2.13614e+06	0.138541	0.146499	0.606215	0	0	0.0466211
tr|C6KT13|C6KT13_PLAF7	C6KT13	PF3D7_0617200	Uncharacterized protein OS=Plasmodium falciparum (isolate 3D7) OX=36329 GN=PF3D7_0617200 PE=4 SV=1	1203.74	0	34	tr|C6KT13|C6KT13_PLAF7	1.2415e+08	1.20586e+08	1.13218e+08	8.89366e+07	1.08954e+08	9.43466e+07	1.20586e+08	9.43466e+07	0.0467231	0.106298	-0.354021	0	0.0144928	0.0485054
tr|A0A143ZYR6|A0A143ZYR6_PLAF7	A0A143ZYR6	PF3D7_1120000	Uncharacterized protein OS=Plasmodium falciparum (isolate 3D7) OX=36329 GN=PF3D7_1120000 PE=4 SV=1	1139.24	0	23	tr|A0A143ZYR6|A0A143ZYR6_PLAF7	6.31278e+07	5.81992e+07	5.82659e+07	4.93975e+07	5.17047e+07	5.05604e+07	5.82659e+07	5.05604e+07	0.0472145	0.0228194	-0.204644	0.0416667	0.03125	0.0486969
tr|Q8ID24|Q8ID24_PLAF7	Q8ID24	PF3D7_1368600	Mitochondrial import inner membrane translocase subunit TIM9, putative OS=Plasmodium falciparum (isolate 3D7) OX=36329 GN=PF3D7_1368600 PE=4 SV=1	49.39	0.000765697	2	tr|Q8ID24|Q8ID24_PLAF7	845811	1.09504e+06	1.15839e+06	1.55278e+06	1.30599e+06	1.23543e+06	1.09504e+06	1.30599e+06	0.159952	0.122099	0.254167	0	0	0.0499022
tr|O77325|O77325_PLAF7	O77325	PF3D7_0308600	Pre-mRNA-processing factor 19, putative OS=Plasmodium falciparum (isolate 3D7) OX=36329 GN=PF3D7_0308600 PE=4 SV=1	215.94	0	6	tr|O77325|O77325_PLAF7	1.68376e+06	2.42798e+06	2.17856e+06	3.37764e+06	2.47971e+06	2.77289e+06	2.17856e+06	2.77289e+06	0.180655	0.159167	0.348012	0	0	0.0505172
tr|Q9U0L4|Q9U0L4_PLAF7	Q9U0L4	PF3D7_0407200	Peptidyl-tRNA hydrolase 2, putative OS=Plasmodium falciparum (isolate 3D7) OX=36329 GN=PF3D7_0407200 PE=4 SV=2	169.41	0	4	tr|Q9U0L4|Q9U0L4_PLAF7	1.08329e+06	2.35238e+06	2.65915e+06	3.05963e+06	3.50954e+06	3.66266e+06	2.35238e+06	3.50954e+06	0.411234	0.0919047	0.577157	0	0	0.0506342
tr|Q8IHQ8|Q8IHQ8_PLAF7	Q8IHQ8	PF3D7_1146000	Ribosome assembly protein 4, putative OS=Plasmodium falciparum (isolate 3D7) OX=36329 GN=PF3D7_1146000 PE=4 SV=1	310.72	0	8	tr|Q8IHQ8|Q8IHQ8_PLAF7	2.67175e+06	3.05817e+06	2.65647e+06	3.32995e+06	3.22227e+06	3.57884e+06	2.67175e+06	3.32995e+06	0.0814321	0.0541565	0.317715	0.133333	0.0333333	0.0507621
tr|Q8IKW9|Q8IKW9_PLAF7	Q8IKW9	PF3D7_1450700	cwf21 domain-containing protein OS=Plasmodium falciparum (isolate 3D7) OX=36329 GN=PF3D7_1450700 PE=4 SV=1	54.59	0.000789889	2	tr|Q8IKW9|Q8IKW9_PLAF7	1.0844e+08	4.66043e+07	5.4277e+07	4.48732e+07	3.4042e+07	3.25856e+07	5.4277e+07	3.4042e+07	0.483063	0.180629	-0.673023	0	0	0.05134
tr|C6KSZ7|C6KSZ7_PLAF7	C6KSZ7	PF3D7_0615600	Uncharacterized protein OS=Plasmodium falciparum (isolate 3D7) OX=36329 GN=PF3D7_0615600 PE=4 SV=1	86.24	0	4	tr|C6KSZ7|C6KSZ7_PLAF7	609707	575512	642904	522240	531500	464396	609707	522240	0.0552983	0.0718619	-0.223403	0.166667	0.25	0.0516119
tr|Q8IL96|Q8IL96_PLAF7	Q8IL96	PF3D7_1437000	N-acetyltransferase, putative OS=Plasmodium falciparum (isolate 3D7) OX=36329 GN=PF3D7_1437000 PE=4 SV=2	276.01	0	8	tr|Q8IL96|Q8IL96_PLAF7	2.85911e+06	5.02065e+06	4.82057e+06	6.66487e+06	5.49747e+06	6.34292e+06	4.82057e+06	6.34292e+06	0.282136	0.0977477	0.395944	0.0333333	0	0.0517472
tr|O77366|O77366_PLAF7	O77366	PF3D7_0319200	Endonuclease/exonuclease/phosphatase family protein, putative OS=Plasmodium falciparum (isolate 3D7) OX=36329 GN=PF3D7_0319200 PE=4 SV=2	50.08	0.00077101	3	tr|O77366|O77366_PLAF7	153305	267717	262459	361647	277304	421412	262459	361647	0.283512	0.204843	0.462488	0	0	0.0525676
tr|C0H5D3|C0H5D3_PLAF7	C0H5D3	PF3D7_1324700	SNARE protein, putative OS=Plasmodium falciparum (isolate 3D7) OX=36329 GN=PF3D7_1324700 PE=3 SV=1	191.75	0	4	tr|C0H5D3|C0H5D3_PLAF7	5.14067e+06	4.04328e+06	3.38289e+06	3.23198e+06	3.13735e+06	2.93474e+06	4.04328e+06	3.13735e+06	0.211962	0.0489645	-0.365978	0	0	0.0532088
tr|Q8ILX1|Q8ILX1_PLAF7	Q8ILX1	PF3D7_1412300	Nuclear transport factor 2, putative OS=Plasmodium falciparum (isolate 3D7) OX=36329 GN=PF3D7_1412300 PE=4 SV=2	435.61	0	6	tr|Q8ILX1|Q8ILX1_PLAF7	5.06782e+07	3.93694e+07	3.77317e+07	3.46935e+07	3.10876e+07	3.37859e+07	3.93694e+07	3.37859e+07	0.165512	0.0565127	-0.22065	0.030303	0.030303	0.0550003
tr|Q8IFP5|Q8IFP5_PLAF7	Q8IFP5	PF3D7_0422100	Transmembrane emp24 domain-containing protein,putative OS=Plasmodium falciparum (isolate 3D7) OX=36329 GN=PF3D7_0422100 PE=3 SV=1	164.17	0	3	tr|Q8IFP5|Q8IFP5_PLAF7	2.73864e+06	2.49259e+06	2.91734e+06	3.17474e+06	3.11923e+06	3.7228e+06	2.73864e+06	3.17474e+06	0.078515	0.0999131	0.21318	0	0	0.0557847
tr|Q8II17|Q8II17_PLAF7	Q8II17	PF3D7_1134700	DNA-directed RNA polymerase subunit beta OS=Plasmodium falciparum (isolate 3D7) OX=36329 GN=PF3D7_1134700 PE=3 SV=1	140.46	0	4	tr|Q8II17|Q8II17_PLAF7	1.81485e+06	2.39778e+06	2.57649e+06	2.93597e+06	2.67165e+06	3.28181e+06	2.39778e+06	2.93597e+06	0.175999	0.103264	0.292139	0	0	0.0569628
tr|C6KSV9|C6KSV9_PLAF7	C6KSV9	PF3D7_0611400	SWI/SNF-related matrix-associated actin-dependent regulator of chromatin OS=Plasmodium falciparum (isolate 3D7) OX=36329 GN=PF3D7_0611400 PE=4 SV=1	129.35	0	6	tr|C6KSV9|C6KSV9_PLAF7	1.50567e+06	1.52383e+06	1.18291e+06	1.73722e+06	1.64121e+06	1.91584e+06	1.50567e+06	1.73722e+06	0.136597	0.0789748	0.206375	0	0.0555556	0.057407
tr|Q8ILA4|Q8ILA4_PLAF7	Q8ILA4	PF3D7_1436000	Glucose-6-phosphate isomerase OS=Plasmodium falciparum (isolate 3D7) OX=36329 GN=PF3D7_1436000 PE=1 SV=1	1356.11	0	34	tr|Q8ILA4|Q8ILA4_PLAF7	1.55292e+08	1.26881e+08	1.42057e+08	1.13166e+08	1.16001e+08	1.20722e+08	1.42057e+08	1.16001e+08	0.100533	0.0327274	-0.292339	0.00813008	0.00813008	0.0576571
tr|C6KT09|C6KT09_PLAF7	C6KT09	PF3D7_0616800	Malate:quinone oxidoreductase, putative OS=Plasmodium falciparum (isolate 3D7) OX=36329 GN=PF3D7_0616800 PE=4 SV=1	201.18	0	7	tr|C6KT09|C6KT09_PLAF7	3.41234e+06	4.72697e+06	4.89393e+06	6.38312e+06	5.30043e+06	5.48352e+06	4.72697e+06	5.48352e+06	0.186792	0.101272	0.214186	0	0	0.0581792
tr|Q8IDY6|Q8IDY6_PLAF7	Q8IDY6	PF3D7_1334200	Chaperone binding protein, putative OS=Plasmodium falciparum (isolate 3D7) OX=36329 GN=PF3D7_1334200 PE=4 SV=1	572.65	0	17	tr|Q8IDY6|Q8IDY6_PLAF7	1.98816e+07	2.2017e+07	2.35282e+07	1.52817e+07	1.87108e+07	1.87636e+07	2.2017e+07	1.87108e+07	0.0840099	0.11346	-0.234745	0	0	0.0583902
tr|Q8II05|Q8II05_PLAF7	Q8II05	PF3D7_1135900	3-oxo-5-alpha-steroid 4-dehydrogenase, putative OS=Plasmodium falciparum (isolate 3D7) OX=36329 GN=PF3D7_1135900 PE=4 SV=2	157.49	0	4	tr|Q8II05|Q8II05_PLAF7	1.03461e+06	1.26634e+06	1.32843e+06	2.68262e+06	1.41399e+06	1.61335e+06	1.26634e+06	1.61335e+06	0.128002	0.358436	0.349395	0	0	0.0602799
tr|Q8ID42|Q8ID42_PLAF7	Q8ID42	PF3D7_1366600	Signal recognition particle receptor alpha subunit OS=Plasmodium falciparum (isolate 3D7) OX=36329 GN=PF3D7_1366600 PE=4 SV=1	201.83	0	6	tr|Q8ID42|Q8ID42_PLAF7	1.25132e+06	1.14075e+06	1.09634e+06	1.96747e+06	1.34498e+06	1.37989e+06	1.14075e+06	1.37989e+06	0.0686345	0.223609	0.274575	0	0	0.0603842
tr|Q8IC38|Q8IC38_PLAF7	Q8IC38	PF3D7_0703200	Uncharacterized protein OS=Plasmodium falciparum (isolate 3D7) OX=36329 GN=PF3D7_0703200 PE=4 SV=1	33.63	0.00681199	1	tr|Q8IC38|Q8IC38_PLAF7	28585.4	33564.6	43157.4	26539.1	28168.2	23517.5	33564.6	26539.1	0.211003	0.0905017	-0.338821	0	0	0.0607166
tr|Q8ID43|Q8ID43_PLAF7	Q8ID43	PF3D7_1366500	Nucleoside diphosphate kinase OS=Plasmodium falciparum (isolate 3D7) OX=36329 GN=PF3D7_1366500 PE=1 SV=1	767.08	0	13	tr|Q8ID43|Q8ID43_PLAF7	5.72574e+07	5.14774e+07	5.65889e+07	3.90601e+07	4.68879e+07	4.90775e+07	5.65889e+07	4.68879e+07	0.0573753	0.117012	-0.271303	0.030303	0	0.0609329
tr|C6KSU9|C6KSU9_PLAF7	C6KSU9	PF3D7_0610200	RNA-binding protein 25, putative OS=Plasmodium falciparum (isolate 3D7) OX=36329 GN=PF3D7_0610200 PE=4 SV=1	39.9	0.0035791	2	tr|C6KSU9|C6KSU9_PLAF7	279025	354140	335393	360091	463527	409235	335393	409235	0.121097	0.125901	0.287078	0	0	0.0610187
tr|Q8I5A3|Q8I5A3_PLAF7	Q8I5A3	PF3D7_1231800	Asparagine-rich protein, putative OS=Plasmodium falciparum (isolate 3D7) OX=36329 GN=PF3D7_1231800 PE=4 SV=1	222.4	0	6	tr|Q8I5A3|Q8I5A3_PLAF7	2.01761e+06	2.81263e+06	2.63173e+06	2.89491e+06	3.22012e+06	3.47713e+06	2.63173e+06	3.22012e+06	0.167538	0.0912554	0.291104	0	0	0.0616647
tr|Q8I607|Q8I607_PLAF7	Q8I607	PF3D7_1203900	Ubiquitin-conjugating enzyme E2 OS=Plasmodium falciparum (isolate 3D7) OX=36329 GN=PF3D7_1203900 PE=3 SV=1	109.71	0	3	tr|Q8I607|Q8I607_PLAF7	2.14383e+07	1.37404e+07	1.5774e+07	1.29684e+07	1.31003e+07	8.37195e+06	1.5774e+07	1.29684e+07	0.234873	0.234547	-0.282551	0	0	0.0619657
tr|O97248|O97248_PLAF7	O97248	PF3D7_0306900	40S ribosomal protein S23, putative OS=Plasmodium falciparum (isolate 3D7) OX=36329 GN=PF3D7_0306900 PE=1 SV=1	529.91	0	10	tr|O97248|O97248_PLAF7	3.96382e+07	5.01434e+07	4.6782e+07	6.39774e+07	5.30773e+07	5.36257e+07	4.6782e+07	5.36257e+07	0.117855	0.107939	0.196971	0.0238095	0.0238095	0.0630446
tr|Q8IKS5|Q8IKS5_PLAF7	Q8IKS5	PF3D7_1455300	Uncharacterized protein OS=Plasmodium falciparum (isolate 3D7) OX=36329 GN=PF3D7_1455300 PE=4 SV=1	77.7	0	1	tr|Q8IKS5|Q8IKS5_PLAF7	723163	626.386	46632.6	626.386	626.386	626.386	46632.6	626.386	1.57523	0	-6.21814	0.333333	1	0.063068
tr|O97279|O97279_PLAF7	O97279	PF3D7_0319900	Uncharacterized protein OS=Plasmodium falciparum (isolate 3D7) OX=36329 GN=PF3D7_0319900 PE=4 SV=1	63.72	0.0008285	2	tr|O97279|O97279_PLAF7	675927	433266	457433	335282	349977	427927	457433	349977	0.255973	0.134187	-0.386299	0	0	0.0631709
tr|A0A143ZZ50|A0A143ZZ50_PLAF7	A0A143ZZ50	PF3D7_1015200.3	Cysteine--tRNA ligase, putative OS=Plasmodium falciparum (isolate 3D7) OX=36329 GN=PF3D7_1015200.3 PE=3 SV=1	903.03	0	20	tr|A0A143ZZ50|A0A143ZZ50_PLAF7	5.04359e+07	3.61082e+07	3.91092e+07	2.93413e+07	3.17584e+07	3.56218e+07	3.91092e+07	3.17584e+07	0.180408	0.0982576	-0.30037	0.0357143	0.0357143	0.0656474
tr|Q8ILH5|Q8ILH5_PLAF7	Q8ILH5	PF3D7_1428900	Uncharacterized protein OS=Plasmodium falciparum (isolate 3D7) OX=36329 GN=PF3D7_1428900 PE=4 SV=2	30.77	0.01	1	tr|Q8ILH5|Q8ILH5_PLAF7	131096	136814	137287	148525	157543	184685	136814	157543	0.0255116	0.115061	0.203529	0	0	0.0662947
tr|Q8I5F9|Q8I5F9_PLAF7	Q8I5F9	PF3D7_1225800	Ubiquitin-activating enzyme E1 OS=Plasmodium falciparum (isolate 3D7) OX=36329 GN=PF3D7_1225800 PE=4 SV=1	1528.7	0	32	tr|Q8I5F9|Q8I5F9_PLAF7	4.79686e+07	3.52881e+07	3.86818e+07	2.95379e+07	3.31195e+07	3.35565e+07	3.86818e+07	3.31195e+07	0.161503	0.0687483	-0.223974	0.0289855	0.0507246	0.0666368
tr|O96204|O96204_PLAF7	O96204	PF3D7_0212400	Uncharacterized protein OS=Plasmodium falciparum (isolate 3D7) OX=36329 GN=PF3D7_0212400 PE=4 SV=2	87.37	0	4	tr|O96204|O96204_PLAF7	635705	983604	929170	1.16379e+06	1.13341e+06	1.05396e+06	929170	1.13341e+06	0.220291	0.0507706	0.286649	0	0	0.0670224
tr|Q8I3Q6|Q8I3Q6_PLAF7	Q8I3Q6	PF3D7_0520400	Uncharacterized protein OS=Plasmodium falciparum (isolate 3D7) OX=36329 GN=PF3D7_0520400 PE=4 SV=1	165.07	0	5	tr|Q8I3Q6|Q8I3Q6_PLAF7	2.4943e+06	3.55253e+06	3.813e+06	3.76163e+06	4.7102e+06	4.88068e+06	3.55253e+06	4.7102e+06	0.212502	0.135464	0.406941	0.0555556	0	0.0673308
tr|C0H4Q0|C0H4Q0_PLAF7	C0H4Q0	PF3D7_0729000	Signal recognition particle subunit SRP9 OS=Plasmodium falciparum (isolate 3D7) OX=36329 GN=PF3D7_0729000 PE=4 SV=1	182.63	0	3	tr|C0H4Q0|C0H4Q0_PLAF7	3.24376e+06	3.0113e+06	3.02184e+06	2.22254e+06	2.54458e+06	2.87349e+06	3.02184e+06	2.54458e+06	0.0424523	0.127797	-0.247996	0	0	0.0687937
tr|Q8I5E7|Q8I5E7_PLAF7	Q8I5E7	PF3D7_1227100	DNA helicase 60 OS=Plasmodium falciparum (isolate 3D7) OX=36329 GN=PF3D7_1227100 PE=3 SV=1	551.29	0	17	tr|Q8I5E7|Q8I5E7_PLAF7	6.05482e+06	6.42877e+06	6.08566e+06	7.10319e+06	7.07166e+06	7.32716e+06	6.08566e+06	7.10319e+06	0.0335346	0.0194363	0.223053	0.0740741	0	0.0688222
tr|Q8IIR2|Q8IIR2_PLAF7	Q8IIR2	PF3D7_1109400	Essential nuclear protein 1, putative OS=Plasmodium falciparum (isolate 3D7) OX=36329 GN=PF3D7_1109400 PE=4 SV=2	54.44	0.000788644	3	tr|Q8IIR2|Q8IIR2_PLAF7	1.7685e+06	2.06359e+06	1.93466e+06	2.57816e+06	2.02978e+06	2.58382e+06	1.93466e+06	2.57816e+06	0.0769585	0.132759	0.414261	0	0	0.0691084
tr|Q8IM32|Q8IM32_PLAF7	Q8IM32	PF3D7_1406200	HHH_7 domain-containing protein OS=Plasmodium falciparum (isolate 3D7) OX=36329 GN=PF3D7_1406200 PE=4 SV=1	371.09	0	13	tr|Q8IM32|Q8IM32_PLAF7	4.38103e+06	4.05825e+06	5.27542e+06	5.47707e+06	5.28184e+06	6.12265e+06	4.38103e+06	5.47707e+06	0.137931	0.0781997	0.322135	0	0	0.0709879
tr|C0H5C7|C0H5C7_PLAF7	C0H5C7	PF3D7_1320900	RNA-binding protein, putative OS=Plasmodium falciparum (isolate 3D7) OX=36329 GN=PF3D7_1320900 PE=1 SV=1	78.34	0	2	tr|C0H5C7|C0H5C7_PLAF7	1.32097e+06	940819	929712	449308	974408	648864	940819	648864	0.20939	0.383662	-0.536002	0	0	0.0710016
tr|Q8I5G0|Q8I5G0_PLAF7	Q8I5G0	PF3D7_1225700	Uncharacterized protein OS=Plasmodium falciparum (isolate 3D7) OX=36329 GN=PF3D7_1225700 PE=4 SV=1	91.24	0	4	tr|Q8I5G0|Q8I5G0_PLAF7	1.09587e+06	1.04354e+06	1.21592e+06	746893	1.00621e+06	938734	1.09587e+06	938734	0.079023	0.14994	-0.223284	0	0	0.0717364
tr|A0A144A3T1|A0A144A3T1_PLAF7	A0A144A3T1	PF3D7_1444800	Fructose-bisphosphate aldolase OS=Plasmodium falciparum (isolate 3D7) OX=36329 GN=PF3D7_1444800 PE=3 SV=1	3312.38	0	40	tr|A0A144A3T1|A0A144A3T1_PLAF7	1.6873e+09	1.4694e+09	1.51519e+09	1.39052e+09	1.21595e+09	1.32645e+09	1.51519e+09	1.32645e+09	0.0737748	0.067361	-0.191928	0.0284553	0.0284553	0.0725263
tr|Q8IE40|Q8IE40_PLAF7	Q8IE40	PF3D7_1327800	Ribose-phosphate pyrophosphokinase, putative OS=Plasmodium falciparum (isolate 3D7) OX=36329 GN=PF3D7_1327800 PE=4 SV=1	670.74	0	15	tr|Q8IE40|Q8IE40_PLAF7	8.96622e+06	9.13801e+06	9.71178e+06	1.27071e+07	1.03958e+07	1.04876e+07	9.13801e+06	1.04876e+07	0.0421081	0.116886	0.198726	0.0333333	0	0.0733919
tr|C0H4S8|C0H4S8_PLAF7	C0H4S8	PF3D7_0807600	Uncharacterized protein OS=Plasmodium falciparum (isolate 3D7) OX=36329 GN=PF3D7_0807600 PE=4 SV=1	323.26	0	10	tr|C0H4S8|C0H4S8_PLAF7	3.24976e+06	3.97782e+06	4.23491e+06	4.30708e+06	4.81354e+06	4.93213e+06	3.97782e+06	4.81354e+06	0.133738	0.0708711	0.275119	0	0	0.0754399
tr|Q8IBL5|Q8IBL5_PLAF7	Q8IBL5	PF3D7_0723800	Uncharacterized protein OS=Plasmodium falciparum (isolate 3D7) OX=36329 GN=PF3D7_0723800 PE=4 SV=1	65.91	0.000834725	1	tr|Q8IBL5|Q8IBL5_PLAF7	41161.7	184804	101843	245464	231836	155049	101843	231836	0.659913	0.231259	1.18676	0	0	0.0755855
tr|Q8I623|Q8I623_PLAF7	Q8I623	PF3D7_1202200	Mitochondrial phosphate carrier protein OS=Plasmodium falciparum (isolate 3D7) OX=36329 GN=PF3D7_1202200 PE=3 SV=1	78.05	0	2	tr|Q8I623|Q8I623_PLAF7	181333	173527	164170	300952	184568	220446	173527	220446	0.0496688	0.253273	0.345271	0	0	0.0758301
tr|C6KSU1|C6KSU1_PLAF7	C6KSU1	PF3D7_0609400	Mitochondrial cardiolipin synthase, putative OS=Plasmodium falciparum (isolate 3D7) OX=36329 GN=PF3D7_0609400 PE=4 SV=1	33.98	0.0068306	1	tr|C6KSU1|C6KSU1_PLAF7	4297.66	5971.25	12840.7	11654.5	11292	14977.7	5971.25	11654.5	0.587705	0.160693	0.964784	0	0.333333	0.0771366
tr|O96177|O96177_PLAF7	O96177	PF3D7_0209200	3'exoribonuclease, putative OS=Plasmodium falciparum (isolate 3D7) OX=36329 GN=PF3D7_0209200 PE=4 SV=3	60.76	0.000819001	3	tr|O96177|O96177_PLAF7	103432	192796	123469	174973	184367	250866	123469	184367	0.335192	0.203401	0.578438	0	0	0.077904
tr|Q8IKI9|Q8IKI9_PLAF7	Q8IKI9	PF3D7_1464900	ATP-dependent zinc metalloprotease FTSH,putative OS=Plasmodium falciparum (isolate 3D7) OX=36329 GN=PF3D7_1464900 PE=4 SV=1	215.76	0	10	tr|Q8IKI9|Q8IKI9_PLAF7	2.0911e+06	1.80355e+06	1.90357e+06	2.51129e+06	2.2081e+06	2.17734e+06	1.90357e+06	2.2081e+06	0.0755273	0.0802851	0.214094	0.0666667	0.0333333	0.0779294
sp|Q08210|PYRD_PLAF7	Q08210	PFF0160c	Dihydroorotate dehydrogenase (quinone), mitochondrial OS=Plasmodium falciparum (isolate 3D7) OX=36329 GN=PFF0160c PE=1 SV=1	158.97	0	5	sp|Q08210|PYRD_PLAF7	1.84469e+06	1.9366e+06	1.90219e+06	2.23087e+06	2.05238e+06	2.34943e+06	1.90219e+06	2.23087e+06	0.0245116	0.0676321	0.229952	0	0	0.0786269
tr|Q9NFB3|Q9NFB3_PLAF7	Q9NFB3	PF3D7_0100400	Rifin OS=Plasmodium falciparum (isolate 3D7) OX=36329 GN=PF3D7_0100400 PE=4 SV=1	556.69	0	10	tr|Q9NFB3|Q9NFB3_PLAF7	1.18132e+07	1.56397e+07	1.67598e+07	2.27109e+07	1.82687e+07	1.69115e+07	1.56397e+07	1.82687e+07	0.175997	0.157194	0.224157	0	0.0238095	0.079375
tr|Q8IM38|Q8IM38_PLAF7	Q8IM38	PF3D7_1405600	Ribonucleotide reductase small subunit OS=Plasmodium falciparum (isolate 3D7) OX=36329 GN=PF3D7_1405600 PE=4 SV=1	757.86	0	13	tr|Q8IM38|Q8IM38_PLAF7	3.75828e+07	4.03475e+07	3.96411e+07	3.39317e+07	3.46675e+07	3.35258e+07	3.96411e+07	3.39317e+07	0.036651	0.0170017	-0.224363	0	0	0.0796387
tr|Q8IIU7|Q8IIU7_PLAF7	Q8IIU7	PF3D7_1105600	Translocon component PTEX88 OS=Plasmodium falciparum (isolate 3D7) OX=36329 GN=PF3D7_1105600 PE=4 SV=2	266.28	0	9	tr|Q8IIU7|Q8IIU7_PLAF7	3.08336e+06	3.73477e+06	4.23568e+06	4.45737e+06	4.65178e+06	4.40537e+06	3.73477e+06	4.45737e+06	0.156813	0.0288313	0.255172	0.0333333	0.0333333	0.0797301
tr|Q8IL89|Q8IL89_PLAF7	Q8IL89	PF3D7_1437700	Succinyl-CoA ligase, putative OS=Plasmodium falciparum (isolate 3D7) OX=36329 GN=PF3D7_1437700 PE=4 SV=1	47.88	0.00150489	1	tr|Q8IL89|Q8IL89_PLAF7	92335.9	80835	48166.4	75629.6	200202	148551	80835	148551	0.310583	0.442442	0.877907	0.333333	0	0.0799781
tr|Q8I6Z4|Q8I6Z4_PLAF7	Q8I6Z4	PF3D7_1368200	ABC transporter E family member 1, putative OS=Plasmodium falciparum (isolate 3D7) OX=36329 GN=PF3D7_1368200 PE=4 SV=1	773.7	0	15	tr|Q8I6Z4|Q8I6Z4_PLAF7	3.37312e+07	2.26561e+07	2.34833e+07	2.06815e+07	1.94421e+07	2.06254e+07	2.34833e+07	2.06254e+07	0.231722	0.034567	-0.187213	0.0185185	0	0.0799896
tr|Q8I6Z5|Q8I6Z5_PLAF7	Q8I6Z5	PF3D7_1323500	Plasmepsin V OS=Plasmodium falciparum (isolate 3D7) OX=36329 GN=PF3D7_1323500 PE=3 SV=1	183.07	0	5	tr|Q8I6Z5|Q8I6Z5_PLAF7	2.23597e+06	1.82485e+06	1.80131e+06	2.63274e+06	2.07864e+06	2.62057e+06	1.82485e+06	2.62057e+06	0.125096	0.129483	0.522104	0	0	0.0808139
tr|Q8IDI8|Q8IDI8_PLAF7	Q8IDI8	PF3D7_1351100	Uncharacterized protein OS=Plasmodium falciparum (isolate 3D7) OX=36329 GN=PF3D7_1351100 PE=1 SV=1	265.73	0	7	tr|Q8IDI8|Q8IDI8_PLAF7	6.79309e+06	5.71615e+06	6.39573e+06	5.19299e+06	5.39031e+06	5.4722e+06	6.39573e+06	5.39031e+06	0.0864217	0.0268184	-0.24674	0.111111	0	0.0811962
tr|Q8IDE5|Q8IDE5_PLAF7	Q8IDE5	PF3D7_1355700	NLI interacting factor-like phosphatase,putative OS=Plasmodium falciparum (isolate 3D7) OX=36329 GN=PF3D7_1355700 PE=4 SV=1	41.13	0.00361011	2	tr|Q8IDE5|Q8IDE5_PLAF7	413943	237145	236385	101199	265343	149756	237145	149756	0.345794	0.489962	-0.663154	0	0	0.0817462
tr|Q8I5Q6|Q8I5Q6_PLAF7	Q8I5Q6	PF3D7_1215000	Thioredoxin peroxidase 2 OS=Plasmodium falciparum (isolate 3D7) OX=36329 GN=PF3D7_1215000 PE=1 SV=1	69.36	0.00084317	2	tr|Q8I5Q6|Q8I5Q6_PLAF7	368741	365006	390733	616860	605976	366166	368741	605976	0.0370881	0.267527	0.716653	0	0	0.0830397
tr|Q8I3H2|Q8I3H2_PLAF7	Q8I3H2	PF3D7_0529500	Cell cycle regulator protein, putative OS=Plasmodium falciparum (isolate 3D7) OX=36329 GN=PF3D7_0529500 PE=4 SV=1	38.78	0.00426136	3	tr|Q8I3H2|Q8I3H2_PLAF7	3.97206e+06	3.97113e+06	3.42212e+06	2.97988e+06	3.03208e+06	3.49715e+06	3.97113e+06	3.03208e+06	0.0837394	0.089843	-0.389239	0	0	0.0830846
tr|Q8I5U3|Q8I5U3_PLAF7	Q8I5U3	PF3D7_1210600	Uncharacterized protein OS=Plasmodium falciparum (isolate 3D7) OX=36329 GN=PF3D7_1210600 PE=4 SV=1	97.01	0	5	tr|Q8I5U3|Q8I5U3_PLAF7	1.54131e+06	1.41308e+06	1.43391e+06	1.19006e+06	1.38957e+06	1.02091e+06	1.43391e+06	1.19006e+06	0.0470433	0.153758	-0.268928	0.133333	0.133333	0.0831742
tr|C6S3F0|C6S3F0_PLAF7	C6S3F0	PF3D7_1111500	Acylphosphatase OS=Plasmodium falciparum (isolate 3D7) OX=36329 GN=PF3D7_1111500 PE=3 SV=1	238.4	0	6	tr|C6S3F0|C6S3F0_PLAF7	6.46892e+06	5.58865e+06	5.59186e+06	4.83984e+06	5.43522e+06	4.35342e+06	5.59186e+06	4.83984e+06	0.0862296	0.111115	-0.20837	0	0	0.0832658
tr|Q8IJR4|Q8IJR4_PLAF7	Q8IJR4	PF3D7_1013100	U3 small nucleolar RNA-associated protein 13,putative OS=Plasmodium falciparum (isolate 3D7) OX=36329 GN=PF3D7_1013100 PE=4 SV=1	42.4	0.00291333	2	tr|Q8IJR4|Q8IJR4_PLAF7	277880	257390	359999	371079	342113	405304	277880	371079	0.181961	0.0848422	0.41726	0	0	0.0837703
tr|Q8IJT1|Q8IJT1_PLAF7	Q8IJT1	PF3D7_1011400	Proteasome subunit beta OS=Plasmodium falciparum (isolate 3D7) OX=36329 GN=PF3D7_1011400 PE=1 SV=1	293.2	0	5	tr|Q8IJT1|Q8IJT1_PLAF7	2.34134e+07	1.97059e+07	2.03062e+07	1.57001e+07	1.89758e+07	1.80567e+07	2.03062e+07	1.80567e+07	0.0941275	0.0961217	-0.169382	0	0	0.0849185
tr|A0A144A0C0|A0A144A0C0_PLAF7	A0A144A0C0	PF3D7_1237600	Periodic tryptophan protein 1, putative OS=Plasmodium falciparum (isolate 3D7) OX=36329 GN=PF3D7_1237600 PE=4 SV=1	56.57	0.000799361	3	tr|A0A144A0C0|A0A144A0C0_PLAF7	405689	699425	683080	830369	789973	784186	683080	789973	0.276937	0.0313906	0.20975	0	0	0.085469
tr|B9ZSH7|B9ZSH7_PLAF7	B9ZSH7	PF3D7_0101300	Pfmc-2TM Maurer's cleft two transmembrane protein OS=Plasmodium falciparum (isolate 3D7) OX=36329 GN=PF3D7_0101300 PE=4 SV=1	289.69	0	5	tr|B9ZSH7|B9ZSH7_PLAF7	1.13058e+07	1.05798e+07	9.98968e+06	1.52376e+07	1.23976e+07	1.15301e+07	1.05798e+07	1.23976e+07	0.0620441	0.148543	0.228744	0	0	0.0858264
tr|A0A143ZWL7|A0A143ZWL7_PLAF7	A0A143ZWL7	PF3D7_1008700	Tubulin beta chain OS=Plasmodium falciparum (isolate 3D7) OX=36329 GN=PF3D7_1008700 PE=3 SV=1	2082.37	0	28	tr|A0A143ZWL7|A0A143ZWL7_PLAF7	3.48646e+08	2.99692e+08	2.92475e+08	2.76178e+08	2.62445e+08	2.58565e+08	2.99692e+08	2.62445e+08	0.0974497	0.0348264	-0.191466	0.0326797	0.0196078	0.0863299
tr|O77343|O77343_PLAF7	O77343	PF3D7_0312500	Transporter, putative OS=Plasmodium falciparum (isolate 3D7) OX=36329 GN=PF3D7_0312500 PE=4 SV=1	48.4	0.000757002	3	tr|O77343|O77343_PLAF7	1.10922e+06	1.28881e+06	1.25993e+06	1.25908e+06	1.674e+06	1.61909e+06	1.25993e+06	1.61909e+06	0.0790927	0.148533	0.361845	0	0	0.0864926
tr|O97275|O97275_PLAF7	O97275	PF3D7_0314300	Derlin OS=Plasmodium falciparum (isolate 3D7) OX=36329 GN=PF3D7_0314300 PE=3 SV=4	178.96	0	1	tr|O97275|O97275_PLAF7	121964	53515.4	100363	122068	3573.21	4491.35	100363	4491.35	0.380562	1.57108	-4.48193	0.666667	0.666667	0.0870128
tr|Q8ILK2|Q8ILK2_PLAF7	Q8ILK2	PF3D7_1426100	Nascent polypeptide-associated complex subunit beta OS=Plasmodium falciparum (isolate 3D7) OX=36329 GN=PF3D7_1426100 PE=3 SV=1	409.36	0	10	tr|Q8ILK2|Q8ILK2_PLAF7	5.0986e+07	5.52118e+07	5.47806e+07	4.68732e+07	4.63879e+07	4.70044e+07	5.47806e+07	4.68732e+07	0.043335	0.00694644	-0.224901	0.030303	0	0.0873668
tr|Q8I5X9|Q8I5X9_PLAF7	Q8I5X9	PF3D7_1206600	DNA-directed RNA polymerase subunit beta OS=Plasmodium falciparum (isolate 3D7) OX=36329 GN=PF3D7_1206600 PE=3 SV=1	80.14	0	3	tr|Q8I5X9|Q8I5X9_PLAF7	79000.5	147444	140901	200288	172376	149779	140901	172376	0.308449	0.145287	0.290871	0	0	0.0875092
tr|Q76NN7|Q76NN7_PLAF7	Q76NN7	PF3D7_0322000	Peptidyl-prolyl cis-trans isomerase OS=Plasmodium falciparum (isolate 3D7) OX=36329 GN=PF3D7_0322000 PE=3 SV=1	1040.06	0	11	tr|Q76NN7|Q76NN7_PLAF7	4.19922e+08	3.51514e+08	3.75797e+08	3.46685e+08	2.97987e+08	3.20807e+08	3.75797e+08	3.20807e+08	0.0906892	0.0757091	-0.228248	0.025641	0.025641	0.0877628
tr|Q8IBF6|Q8IBF6_PLAF7	Q8IBF6	PF3D7_0730300	Transcription factor with AP2 domain(S) OS=Plasmodium falciparum (isolate 3D7) OX=36329 GN=PF3D7_0730300 PE=4 SV=1	115.23	0	5	tr|Q8IBF6|Q8IBF6_PLAF7	2.35938e+06	2.29538e+06	2.83654e+06	3.13651e+06	2.75215e+06	3.07314e+06	2.35938e+06	3.07314e+06	0.118417	0.0689825	0.381308	0.133333	0.133333	0.0889159
tr|Q8I1T4|Q8I1T4_PLAF7	Q8I1T4	PF3D7_0415300	Cdc2-related protein kinase 3 OS=Plasmodium falciparum (isolate 3D7) OX=36329 GN=PF3D7_0415300 PE=4 SV=1	81.21	0	3	tr|Q8I1T4|Q8I1T4_PLAF7	217503	366190	379068	460222	413525	422775	366190	422775	0.2798	0.0572142	0.207297	0	0	0.0889857
tr|C0H5J2|C0H5J2_PLAF7	C0H5J2	PF3D7_1359600	Uncharacterized protein OS=Plasmodium falciparum (isolate 3D7) OX=36329 GN=PF3D7_1359600 PE=4 SV=1	108.4	0	5	tr|C0H5J2|C0H5J2_PLAF7	929818	1.21161e+06	1.03386e+06	706217	945125	875938	1.03386e+06	875938	0.13463	0.145922	-0.239136	0	0	0.0901902
tr|A0A144A2J9|A0A144A2J9_PLAF7	A0A144A2J9	PF3D7_1434300	Hsp70/Hsp90 organizing protein OS=Plasmodium falciparum (isolate 3D7) OX=36329 GN=PF3D7_1434300 PE=4 SV=1	1466.88	0	35	tr|A0A144A2J9|A0A144A2J9_PLAF7	1.72938e+08	1.62721e+08	1.61202e+08	1.45121e+08	1.45099e+08	1.44313e+08	1.62721e+08	1.45099e+08	0.0385358	0.00317651	-0.165358	0	0	0.0908385
tr|Q8IKK1|Q8IKK1_PLAF7	Q8IKK1	PF3D7_1463500	Fam-a protein OS=Plasmodium falciparum (isolate 3D7) OX=36329 GN=PF3D7_1463500 PE=4 SV=1	54.29	0	2	tr|Q8IKK1|Q8IKK1_PLAF7	281698	182063	160735	88598.4	204247	91334.2	182063	91334.2	0.310175	0.515338	-0.995215	0.166667	0	0.0932054
tr|Q8I3U4|Q8I3U4_PLAF7	Q8I3U4	PF3D7_0516400	Phosducin-like protein, putative OS=Plasmodium falciparum (isolate 3D7) OX=36329 GN=PF3D7_0516400 PE=4 SV=1	101.6	0	3	tr|Q8I3U4|Q8I3U4_PLAF7	440316	478879	573706	227778	309105	500953	478879	309105	0.137941	0.405452	-0.631564	0	0	0.093766
tr|A0A144A2N8|A0A144A2N8_PLAF7	A0A144A2N8	PF3D7_1461200	U3 small nucleolar ribonucleoprotein protein IMP3, putative OS=Plasmodium falciparum (isolate 3D7) OX=36329 GN=PF3D7_1461200 PE=4 SV=1	48.27	0.00151172	1	tr|A0A144A2N8|A0A144A2N8_PLAF7	324433	257289	301264	350233	393713	323850	301264	350233	0.115874	0.0991155	0.217284	0	0	0.0939238
tr|Q8IEN3|Q8IEN3_PLAF7	Q8IEN3	PF3D7_1308200	Carbamoyl phosphate synthetase OS=Plasmodium falciparum (isolate 3D7) OX=36329 GN=PF3D7_1308200 PE=4 SV=1	2288.43	0	66	tr|Q8IEN3|Q8IEN3_PLAF7	8.98222e+07	8.23681e+07	8.63527e+07	7.45042e+07	6.99507e+07	7.92554e+07	8.63527e+07	7.45042e+07	0.0432813	0.0623935	-0.212919	0.0462963	0.0324074	0.09398
tr|C6KT90|C6KT90_PLAF7	C6KT90	PF3D7_0625400	Uncharacterized protein OS=Plasmodium falciparum (isolate 3D7) OX=36329 GN=PF3D7_0625400 PE=4 SV=1	32.22	0.00943396	2	tr|C6KT90|C6KT90_PLAF7	688098	822991	679201	893232	882164	809424	688098	882164	0.110357	0.0528418	0.358432	0	0	0.0947218
tr|O77390|O77390_PLAF7	O77390	PF3D7_0316500	Kinetochore protein NUF2, putative OS=Plasmodium falciparum (isolate 3D7) OX=36329 GN=PF3D7_0316500 PE=4 SV=2	117.64	0	5	tr|O77390|O77390_PLAF7	823220	813601	749934	694171	730674	623968	813601	694171	0.0500592	0.0794111	-0.22903	0.0666667	0	0.0954613
tr|Q8IJC9|Q8IJC9_PLAF7	Q8IJC9	PF3D7_1027400	DNA-directed RNA polymerase II subunit RPB7,putative OS=Plasmodium falciparum (isolate 3D7) OX=36329 GN=PF3D7_1027400 PE=4 SV=1	59.04	0.000813008	2	tr|Q8IJC9|Q8IJC9_PLAF7	449068	231197	220881	151335	222628	189417	231197	189417	0.429017	0.189966	-0.287559	0	0.166667	0.0962786
tr|Q8I3P6|Q8I3P6_PLAF7	Q8I3P6	PF3D7_0521700	ATP-dependent RNA helicase DDX1, putative OS=Plasmodium falciparum (isolate 3D7) OX=36329 GN=PF3D7_0521700 PE=4 SV=1	165.34	0	6	tr|Q8I3P6|Q8I3P6_PLAF7	1.04758e+06	1.22507e+06	1.37452e+06	1.41423e+06	1.38341e+06	1.60553e+06	1.22507e+06	1.41423e+06	0.134629	0.0819868	0.20715	0.0555556	0	0.0967941
tr|Q8IB26|Q8IB26_PLAF7	Q8IB26	PF3D7_0819100	BRIX domain, putative OS=Plasmodium falciparum (isolate 3D7) OX=36329 GN=PF3D7_0819100 PE=4 SV=2	81.51	0	2	tr|Q8IB26|Q8IB26_PLAF7	752986	603101	752559	1.0913e+06	772987	831345	752559	831345	0.122941	0.188597	0.143641	0	0	0.0972833
tr|Q8I1X9|Q8I1X9_PLAF7	Q8I1X9	PF3D7_0405000	ATP-dependent RNA helicase DDX51, putative OS=Plasmodium falciparum (isolate 3D7) OX=36329 GN=PF3D7_0405000 PE=4 SV=1	35.62	0.00554785	1	tr|Q8I1X9|Q8I1X9_PLAF7	56295	8632.11	10923.2	6980.97	9767.71	2424.33	10923.2	6980.97	1.0632	0.580045	-0.645894	0.333333	0	0.0977075
tr|Q8I246|Q8I246_PLAF7	Q8I246	PF3D7_0109800	Phenylalanine--tRNA ligase alpha subunit OS=Plasmodium falciparum (isolate 3D7) OX=36329 GN=PF3D7_0109800 PE=4 SV=1	245.07	0	8	tr|Q8I246|Q8I246_PLAF7	4.49108e+06	3.97742e+06	4.04072e+06	3.35655e+06	3.34795e+06	3.95146e+06	4.04072e+06	3.35655e+06	0.0671706	0.097405	-0.267633	0.0740741	0.037037	0.101295
tr|Q8IBS3|Q8IBS3_PLAF7	Q8IBS3	PF3D7_0717700	Serine--tRNA ligase, putative OS=Plasmodium falciparum (isolate 3D7) OX=36329 GN=PF3D7_0717700 PE=4 SV=1	1059.38	0	24	tr|Q8IBS3|Q8IBS3_PLAF7	4.27753e+07	3.87752e+07	3.74017e+07	3.59118e+07	3.25349e+07	3.42998e+07	3.87752e+07	3.42998e+07	0.0704083	0.0493162	-0.176934	0.0430108	0.0107527	0.10136
tr|A0A144A3A5|A0A144A3A5_PLAF7	A0A144A3A5	PF3D7_1428800.2	Transcription initiation TFIID-like, putative OS=Plasmodium falciparum (isolate 3D7) OX=36329 GN=PF3D7_1428800.2 PE=4 SV=1	113.45	0	3	tr|A0A144A3A5|A0A144A3A5_PLAF7	595643	470538	601423	355555	442501	515669	595643	442501	0.133043	0.183043	-0.428768	0	0	0.101869
tr|C6KTA4|C6KTA4_PLAF7	C6KTA4	PF3D7_0626800	Pyruvate kinase OS=Plasmodium falciparum (isolate 3D7) OX=36329 GN=PF3D7_0626800 PE=1 SV=1	5264.18	0	42	tr|C6KTA4|C6KTA4_PLAF7	1.61985e+09	1.47868e+09	1.58152e+09	1.44005e+09	1.31602e+09	1.32343e+09	1.58152e+09	1.32343e+09	0.0467922	0.0511579	-0.257029	0.0298103	0.0243902	0.103407
tr|A0A144A1J6|A0A144A1J6_PLAF7	A0A144A1J6	PF3D7_1419300	Glutathione S-transferase OS=Plasmodium falciparum (isolate 3D7) OX=36329 GN=PF3D7_1419300 PE=3 SV=1	451.41	0	7	tr|A0A144A1J6|A0A144A1J6_PLAF7	3.26114e+07	2.58678e+07	2.69154e+07	2.37057e+07	2.1716e+07	2.56564e+07	2.69154e+07	2.37057e+07	0.12749	0.0831575	-0.183195	0	0	0.105101
tr|Q8I5Z0|Q8I5Z0_PLAF7	Q8I5Z0	PF3D7_1205500	Zinc finger protein, putative OS=Plasmodium falciparum (isolate 3D7) OX=36329 GN=PF3D7_1205500 PE=4 SV=1	48.63	0.000758725	3	tr|Q8I5Z0|Q8I5Z0_PLAF7	650805	290600	313110	222893	282719	259633	313110	259633	0.482531	0.118282	-0.270196	0.111111	0	0.105552
tr|Q8IM45|Q8IM45_PLAF7	Q8IM45	PF3D7_1404900	Uncharacterized protein OS=Plasmodium falciparum (isolate 3D7) OX=36329 GN=PF3D7_1404900 PE=4 SV=1	551.16	0	12	tr|Q8IM45|Q8IM45_PLAF7	3.01628e+07	3.27884e+07	3.12131e+07	3.36808e+07	3.86035e+07	3.62207e+07	3.12131e+07	3.62207e+07	0.042102	0.0680632	0.214664	0.0416667	0.0625	0.106121
tr|Q8I0V2|Q8I0V2_PLAF7	Q8I0V2	PF3D7_1235700	ATP synthase subunit beta OS=Plasmodium falciparum (isolate 3D7) OX=36329 GN=PF3D7_1235700 PE=3 SV=1	892.53	0	16	tr|Q8I0V2|Q8I0V2_PLAF7	1.65431e+07	1.65683e+07	1.73168e+07	1.92861e+07	2.0305e+07	1.81044e+07	1.65683e+07	1.92861e+07	0.0261521	0.0572651	0.219136	0.0333333	0.0166667	0.106124
tr|Q8I3J4|Q8I3J4_PLAF7	Q8I3J4	PF3D7_0527100	Ubiquitin-conjugating enzyme E2 N, putative OS=Plasmodium falciparum (isolate 3D7) OX=36329 GN=PF3D7_0527100 PE=1 SV=1	489.63	0	8	tr|Q8I3J4|Q8I3J4_PLAF7	2.20306e+07	2.53981e+07	2.35574e+07	1.98539e+07	2.07905e+07	2.10328e+07	2.35574e+07	2.07905e+07	0.0712603	0.0302829	-0.18026	0	0	0.106938
sp|Q8I236|KAD6_PLAF7	Q8I236	PFA_0530c	Adenylate kinase isoenzyme 6 homolog OS=Plasmodium falciparum (isolate 3D7) OX=36329 GN=PFA_0530c PE=1 SV=1	114.6	0	3	sp|Q8I236|KAD6_PLAF7	366775	262279	210848	230363	211968	127002	262279	211968	0.283799	0.29054	-0.307254	0.111111	0.333333	0.108242
tr|Q8I4S1|Q8I4S1_PLAF7	Q8I4S1	PF3D7_1251300	Thymidylate kinase OS=Plasmodium falciparum (isolate 3D7) OX=36329 GN=PF3D7_1251300 PE=1 SV=1	81.68	0	3	tr|Q8I4S1|Q8I4S1_PLAF7	597184	510217	595369	389687	481011	531472	595369	481011	0.0875545	0.153763	-0.307714	0	0	0.109873
tr|Q8IHZ8|Q8IHZ8_PLAF7	Q8IHZ8	PF3D7_1136600	Uncharacterized protein OS=Plasmodium falciparum (isolate 3D7) OX=36329 GN=PF3D7_1136600 PE=4 SV=1	89.95	0	3	tr|Q8IHZ8|Q8IHZ8_PLAF7	571280	430940	497976	569041	561558	726338	497976	569041	0.140369	0.15033	0.192456	0.111111	0.111111	0.111608
tr|Q8IAU1|Q8IAU1_PLAF7	Q8IAU1	PF3D7_0810600	ATP-dependent RNA helicase DBP1, putative OS=Plasmodium falciparum (isolate 3D7) OX=36329 GN=PF3D7_0810600 PE=4 SV=1	1868.15	0	40	tr|Q8IAU1|Q8IAU1_PLAF7	1.10542e+08	1.02406e+08	1.00452e+08	8.42931e+07	9.64132e+07	9.18893e+07	1.02406e+08	9.18893e+07	0.0512272	0.0674031	-0.156324	0.0408163	0.0272109	0.111748
tr|Q8IJP9|Q8IJP9_PLAF7	Q8IJP9	PF3D7_1014600	Transcriptional coactivator ADA2 OS=Plasmodium falciparum (isolate 3D7) OX=36329 GN=PF3D7_1014600 PE=4 SV=1	252.14	0	7	tr|Q8IJP9|Q8IJP9_PLAF7	4.82534e+06	3.82945e+06	3.89675e+06	3.7537e+06	3.59706e+06	2.59286e+06	3.89675e+06	3.59706e+06	0.133027	0.190037	-0.115453	0.037037	0	0.112045
tr|Q8IBB4|Q8IBB4_PLAF7	Q8IBB4	PF3D7_0828300	Uncharacterized protein OS=Plasmodium falciparum (isolate 3D7) OX=36329 GN=PF3D7_0828300 PE=4 SV=1	34.62	0.00687758	1	tr|Q8IBB4|Q8IBB4_PLAF7	531799	582559	506018	787621	542110	696106	531799	696106	0.0721011	0.183736	0.388427	0	0	0.112065
tr|Q8I1T1|Q8I1T1_PLAF7	Q8I1T1	PF3D7_0415600	GTP:AMP phosphotransferase OS=Plasmodium falciparum (isolate 3D7) OX=36329 GN=PF3D7_0415600 PE=3 SV=1	88.57	0	3	tr|Q8I1T1|Q8I1T1_PLAF7	386132	223445	257764	149215	226171	232804	257764	226171	0.296612	0.22919	-0.188638	0.222222	0.222222	0.114262
tr|Q8I410|Q8I410_PLAF7	Q8I410	PF3D7_0509400	DNA-directed RNA polymerase subunit OS=Plasmodium falciparum (isolate 3D7) OX=36329 GN=PF3D7_0509400 PE=3 SV=1	144.08	0	5	tr|Q8I410|Q8I410_PLAF7	839449	705395	760763	827799	884359	1.00303e+06	760763	884359	0.087653	0.0988107	0.217184	0	0	0.115367
tr|Q8IDS0|Q8IDS0_PLAF7	Q8IDS0	PF3D7_1341900	V-type proton ATPase subunit D, putative OS=Plasmodium falciparum (isolate 3D7) OX=36329 GN=PF3D7_1341900 PE=4 SV=1	531.8	0	12	tr|Q8IDS0|Q8IDS0_PLAF7	6.66898e+06	7.0902e+06	8.08725e+06	4.65402e+06	6.67292e+06	6.34655e+06	7.0902e+06	6.34655e+06	0.10002	0.183963	-0.159854	0.166667	0.145833	0.116727
sp|P27362|PGK_PLAF7	P27362	PGK	Phosphoglycerate kinase OS=Plasmodium falciparum (isolate 3D7) OX=36329 GN=PGK PE=1 SV=1	6079.21	0	57	sp|P27362|PGK_PLAF7	2.46378e+09	2.1708e+09	2.35477e+09	1.97607e+09	1.93565e+09	2.16879e+09	2.35477e+09	1.97607e+09	0.0635603	0.0614698	-0.252955	0.048218	0.0419287	0.117134
tr|Q8I0P6|Q8I0P6_PLAF7	Q8I0P6	PF3D7_1357000	Elongation factor 1-alpha OS=Plasmodium falciparum (isolate 3D7) OX=36329 GN=PF3D7_1357000 PE=3 SV=1	6440.44	0	66	tr|Q8I0P6|Q8I0P6_PLAF7	6.57045e+09	5.97067e+09	6.19036e+09	5.63429e+09	5.16605e+09	5.63582e+09	6.19036e+09	5.63429e+09	0.0485984	0.0494245	-0.135789	0.0376648	0.0357815	0.118181
tr|A0A143ZYV5|A0A143ZYV5_PLAF7	A0A143ZYV5	PF3D7_1125200	Ubiquitin-like domain-containing protein OS=Plasmodium falciparum (isolate 3D7) OX=36329 GN=PF3D7_1125200 PE=4 SV=1	43.69	0.00220751	2	tr|A0A143ZYV5|A0A143ZYV5_PLAF7	94577.4	59255.9	73867.7	162833	75509.2	112085	73867.7	112085	0.233836	0.375425	0.60158	0.5	0.166667	0.118214
tr|Q7KQL1|Q7KQL1_PLAF7	Q7KQL1	PF3D7_1033600	Myb2 transcription factor, putative OS=Plasmodium falciparum (isolate 3D7) OX=36329 GN=PF3D7_1033600 PE=4 SV=1	71.79	0.000856898	4	tr|Q7KQL1|Q7KQL1_PLAF7	1.04615e+06	1.00307e+06	985811	1.3784e+06	1.18413e+06	1.047e+06	1.00307e+06	1.18413e+06	0.0307168	0.138401	0.239406	0	0	0.11846
tr|Q8I2U4|Q8I2U4_PLAF7	Q8I2U4	PF3D7_0920900	U4/U6 snRNA-associated-splicing factor,putative OS=Plasmodium falciparum (isolate 3D7) OX=36329 GN=PF3D7_0920900 PE=4 SV=1	103.03	0	3	tr|Q8I2U4|Q8I2U4_PLAF7	276802	414916	408258	480672	526895	400000	408258	480672	0.212429	0.136879	0.235575	0	0	0.118491
tr|C6KSR7|C6KSR7_PLAF7	C6KSR7	PF3D7_0606900	Glutaredoxin-like protein OS=Plasmodium falciparum (isolate 3D7) OX=36329 GN=PF3D7_0606900 PE=4 SV=1	324.44	0	7	tr|C6KSR7|C6KSR7_PLAF7	7.20381e+06	5.68981e+06	5.91249e+06	4.9435e+06	4.78825e+06	5.88707e+06	5.91249e+06	4.9435e+06	0.130401	0.114223	-0.258235	0.037037	0	0.119055
tr|O96224|O96224_PLAF7	O96224	PF3D7_0214400	Uncharacterized protein OS=Plasmodium falciparum (isolate 3D7) OX=36329 GN=PF3D7_0214400 PE=4 SV=2	344.9	0	7	tr|O96224|O96224_PLAF7	2.45565e+06	2.16742e+06	1.77389e+06	1.52836e+06	1.95219e+06	1.68764e+06	2.16742e+06	1.68764e+06	0.160498	0.12427	-0.360975	0.185185	0.0740741	0.119069
tr|Q8ILG6|Q8ILG6_PLAF7	Q8ILG6	PF3D7_1429800	Coatamer beta subunit, putative OS=Plasmodium falciparum (isolate 3D7) OX=36329 GN=PF3D7_1429800 PE=4 SV=2	700.64	0	16	tr|Q8ILG6|Q8ILG6_PLAF7	2.85469e+07	1.69367e+07	1.7774e+07	1.43308e+07	1.62598e+07	1.60437e+07	1.7774e+07	1.60437e+07	0.307077	0.0679902	-0.147757	0.0555556	0.0555556	0.119386
tr|Q8IEI6|Q8IEI6_PLAF7	Q8IEI6	PF3D7_1302000	EMP1-trafficking protein OS=Plasmodium falciparum (isolate 3D7) OX=36329 GN=PF3D7_1302000 PE=4 SV=1	223.35	0	6	tr|Q8IEI6|Q8IEI6_PLAF7	1.02526e+07	7.40974e+06	6.13303e+06	1.24442e+07	9.37779e+06	9.39084e+06	7.40974e+06	9.39084e+06	0.265869	0.1698	0.341831	0.0416667	0.0833333	0.119488
tr|Q8I5U6|Q8I5U6_PLAF7	Q8I5U6	PF3D7_1210300	Uncharacterized protein OS=Plasmodium falciparum (isolate 3D7) OX=36329 GN=PF3D7_1210300 PE=4 SV=1	157.84	0	4	tr|Q8I5U6|Q8I5U6_PLAF7	5.29358e+06	6.49998e+06	7.34135e+06	5.15512e+06	5.77269e+06	4.54189e+06	6.49998e+06	5.15512e+06	0.161374	0.119343	-0.334429	0	0	0.119738
tr|A0A143ZX45|A0A143ZX45_PLAF7	A0A143ZX45	PF3D7_0619000.2	FPL domain-containing protein OS=Plasmodium falciparum (isolate 3D7) OX=36329 GN=PF3D7_0619000.2 PE=4 SV=1	35.47	0.00553633	1	tr|A0A143ZX45|A0A143ZX45_PLAF7	231487	165243	117370	103998	151547	89233.8	165243	103998	0.334397	0.283332	-0.668035	0	0	0.119938
tr|A0A144A298|A0A144A298_PLAF7	A0A144A298	PF3D7_1411100.2	Uncharacterized protein OS=Plasmodium falciparum (isolate 3D7) OX=36329 GN=PF3D7_1411100.2 PE=4 SV=1	50.76	0.000774593	2	tr|A0A144A298|A0A144A298_PLAF7	540587	400827	481347	536481	597290	554686	481347	554686	0.147916	0.0554521	0.204595	0	0	0.121647
tr|Q8IHW3|Q8IHW3_PLAF7	Q8IHW3	PF3D7_1140200	Uncharacterized protein OS=Plasmodium falciparum (isolate 3D7) OX=36329 GN=PF3D7_1140200 PE=4 SV=2	444.03	0	13	tr|Q8IHW3|Q8IHW3_PLAF7	2.79906e+07	3.17936e+07	3.1964e+07	2.64831e+07	2.82703e+07	2.47965e+07	3.17936e+07	2.64831e+07	0.0734554	0.0655126	-0.263661	0	0	0.122386
tr|Q8IJJ1|Q8IJJ1_PLAF7	Q8IJJ1	PF3D7_1021200	Uncharacterized protein OS=Plasmodium falciparum (isolate 3D7) OX=36329 GN=PF3D7_1021200 PE=4 SV=1	62.68	0.000823723	2	tr|Q8IJJ1|Q8IJJ1_PLAF7	3.86999e+06	249460	220793	208741	115053	137257	249460	137257	1.45059	0.318554	-0.861928	0.166667	0	0.122596
tr|Q8I6T3|Q8I6T3_PLAF7	Q8I6T3	PF3D7_1328100	Proteasome subunit beta OS=Plasmodium falciparum (isolate 3D7) OX=36329 GN=PF3D7_1328100 PE=1 SV=1	470.48	0	12	tr|Q8I6T3|Q8I6T3_PLAF7	1.63737e+07	1.39365e+07	1.38908e+07	1.27595e+07	1.30116e+07	1.25458e+07	1.39365e+07	1.27595e+07	0.0964118	0.0182548	-0.127296	0.0238095	0.047619	0.123111
tr|Q8I375|Q8I375_PLAF7	Q8I375	PF3D7_0907600	Translation initiation factor SUI1, putative OS=Plasmodium falciparum (isolate 3D7) OX=36329 GN=PF3D7_0907600 PE=4 SV=1	251.11	0	7	tr|Q8I375|Q8I375_PLAF7	662747	960381	1.15913e+06	1.17001e+06	1.07627e+06	1.36842e+06	960381	1.17001e+06	0.269379	0.1238	0.284846	0	0	0.124263
sp|Q8I3W2|RPIA_PLAF7	Q8I3W2	PF3D7_0514600	Ribose-5-phosphate isomerase OS=Plasmodium falciparum (isolate 3D7) OX=36329 GN=PF3D7_0514600 PE=1 SV=1	36.07	0.00556328	2	sp|Q8I3W2|RPIA_PLAF7	432289	444210	504183	349399	432797	395474	444210	395474	0.0837207	0.106419	-0.167658	0	0	0.124435
tr|Q8I5C5|Q8I5C5_PLAF7	Q8I5C5	PF3D7_1229400	Macrophage migration inhibitory factor OS=Plasmodium falciparum (isolate 3D7) OX=36329 GN=PF3D7_1229400 PE=1 SV=1	323.59	0	7	tr|Q8I5C5|Q8I5C5_PLAF7	1.77623e+08	1.23769e+08	1.36644e+08	1.18283e+08	1.14612e+08	1.23336e+08	1.36644e+08	1.18283e+08	0.192605	0.0368852	-0.208182	0	0	0.12502
tr|C0H4X4|C0H4X4_PLAF7	C0H4X4	PF3D7_0824200	Uncharacterized protein OS=Plasmodium falciparum (isolate 3D7) OX=36329 GN=PF3D7_0824200 PE=4 SV=1	33	0.00814664	1	tr|C0H4X4|C0H4X4_PLAF7	172238	277692	205415	242639	264826	381986	205415	264826	0.246837	0.252539	0.366502	0	0	0.12616
tr|Q8IIR8|Q8IIR8_PLAF7	Q8IIR8	PF3D7_1108500	Succinate--CoA ligase [ADP-forming] subunit alpha, mitochondrial OS=Plasmodium falciparum (isolate 3D7) OX=36329 GN=PF3D7_1108500 PE=3 SV=2	55.87	0.000796813	2	tr|Q8IIR8|Q8IIR8_PLAF7	839696	738157	742558	825726	889316	965626	742558	889316	0.074205	0.0783905	0.260193	0.166667	0	0.126223
tr|Q8I3B4|Q8I3B4_PLAF7	Q8I3B4	PF3D7_0903400	DEAD/DEAH box helicase, putative OS=Plasmodium falciparum (isolate 3D7) OX=36329 GN=PF3D7_0903400 PE=4 SV=1	945.81	0	23	tr|Q8I3B4|Q8I3B4_PLAF7	1.09449e+07	1.09686e+07	1.07487e+07	1.03958e+07	9.41552e+06	8.88586e+06	1.09449e+07	9.41552e+06	0.0110864	0.08009	-0.217142	0.0714286	0.0595238	0.126364
sp|Q8IAY6|SODF_PLAF7	Q8IAY6	SODB	Superoxide dismutase [Fe] OS=Plasmodium falciparum (isolate 3D7) OX=36329 GN=SODB PE=1 SV=1	261.52	0	8	sp|Q8IAY6|SODF_PLAF7	2.40972e+07	1.49567e+07	1.64296e+07	1.3362e+07	1.37961e+07	1.53606e+07	1.64296e+07	1.37961e+07	0.265356	0.0741723	-0.252035	0	0	0.126519
tr|Q8IIC0|Q8IIC0_PLAF7	Q8IIC0	PF3D7_1124300	Uncharacterized protein OS=Plasmodium falciparum (isolate 3D7) OX=36329 GN=PF3D7_1124300 PE=4 SV=1	231.61	0	5	tr|Q8IIC0|Q8IIC0_PLAF7	1.07851e+06	1.39634e+06	1.41019e+06	1.65474e+06	1.41106e+06	1.57216e+06	1.39634e+06	1.57216e+06	0.144885	0.0801616	0.171099	0.0555556	0.0555556	0.126716
tr|Q8IJZ4|Q8IJZ4_PLAF7	Q8IJZ4	PF3D7_1004300	E3 ubiquitin-protein ligase, putative OS=Plasmodium falciparum (isolate 3D7) OX=36329 GN=PF3D7_1004300 PE=4 SV=1	239.56	0	4	tr|Q8IJZ4|Q8IJZ4_PLAF7	1.82348e+06	2.09562e+06	1.97232e+06	1.50668e+06	1.82703e+06	1.73729e+06	1.97232e+06	1.73729e+06	0.0693919	0.0977665	-0.183051	0.0833333	0	0.127147
tr|A0A143ZWW4|A0A143ZWW4_PLAF7	A0A143ZWW4	PF3D7_0217500	Calcium-dependent protein kinase 1 OS=Plasmodium falciparum (isolate 3D7) OX=36329 GN=PF3D7_0217500 PE=4 SV=1	91.54	0	3	tr|A0A143ZWW4|A0A143ZWW4_PLAF7	823521	643360	622565	1.2541e+06	865949	720951	643360	865949	0.158668	0.291091	0.428654	0	0	0.127807
tr|Q8I322|Q8I322_PLAF7	Q8I322	PF3D7_0913000	Uncharacterized protein OS=Plasmodium falciparum (isolate 3D7) OX=36329 GN=PF3D7_0913000 PE=4 SV=1	75.57	0.000870322	3	tr|Q8I322|Q8I322_PLAF7	4.14783e+06	5.11467e+06	4.49619e+06	5.01697e+06	5.47772e+06	5.41108e+06	4.49619e+06	5.41108e+06	0.10677	0.0469676	0.267213	0	0	0.127885
tr|Q8IAR3|Q8IAR3_PLAF7	Q8IAR3	PF3D7_0807500	Proteasome endopeptidase complex OS=Plasmodium falciparum (isolate 3D7) OX=36329 GN=PF3D7_0807500 PE=1 SV=2	734.1	0	16	tr|Q8IAR3|Q8IAR3_PLAF7	4.36213e+07	3.4996e+07	3.61909e+07	3.10311e+07	3.12554e+07	3.52083e+07	3.61909e+07	3.12554e+07	0.122114	0.0722992	-0.211519	0	0	0.128303
tr|O97314|O97314_PLAF7	O97314	PF3D7_0323000	Translation machinery-associated protein 7,putative OS=Plasmodium falciparum (isolate 3D7) OX=36329 GN=PF3D7_0323000 PE=4 SV=1	56.9	0.000801925	2	tr|O97314|O97314_PLAF7	5.07436e+06	9.27218e+06	7.26065e+06	4.2084e+06	6.75986e+06	4.10884e+06	7.26065e+06	4.2084e+06	0.291502	0.298993	-0.786827	0	0	0.129717
tr|Q8IJ77|Q8IJ77_PLAF7	Q8IJ77	PF3D7_1033100	S-adenosylmethionine decarboxylase/ornithine decarboxylase OS=Plasmodium falciparum (isolate 3D7) OX=36329 GN=PF3D7_1033100 PE=4 SV=1	1602.66	0	39	tr|Q8IJ77|Q8IJ77_PLAF7	4.15716e+07	4.1615e+07	4.40284e+07	3.64945e+07	3.81522e+07	3.84482e+07	4.1615e+07	3.81522e+07	0.0331588	0.0279315	-0.125336	0.0666667	0.0466667	0.130111
tr|Q8IIL0|Q8IIL0_PLAF7	Q8IIL0	PF3D7_1115400	Cysteine proteinase falcipain 3 OS=Plasmodium falciparum (isolate 3D7) OX=36329 GN=PF3D7_1115400 PE=3 SV=1	333.56	0	10	tr|Q8IIL0|Q8IIL0_PLAF7	1.23804e+07	1.12704e+07	1.08411e+07	9.2233e+06	1.05563e+07	1.02674e+07	1.12704e+07	1.02674e+07	0.0690895	0.0700134	-0.134467	0.030303	0.0606061	0.130532
tr|Q8IBL9|Q8IBL9_PLAF7	Q8IBL9	PF3D7_0723400	Uncharacterized protein OS=Plasmodium falciparum (isolate 3D7) OX=36329 GN=PF3D7_0723400 PE=4 SV=1	87.7	0	3	tr|Q8IBL9|Q8IBL9_PLAF7	221842	416770	367666	353192	573889	490665	367666	490665	0.302255	0.23584	0.41634	0.111111	0	0.131096
tr|C6KSQ7|C6KSQ7_PLAF7	C6KSQ7	PF3D7_0605900	Elongation of fatty acids protein OS=Plasmodium falciparum (isolate 3D7) OX=36329 GN=PF3D7_0605900 PE=3 SV=1	169.54	0	3	tr|C6KSQ7|C6KSQ7_PLAF7	2.78512e+06	2.20502e+06	2.28012e+06	3.4171e+06	2.69911e+06	2.68068e+06	2.28012e+06	2.69911e+06	0.13018	0.143217	0.243373	0	0.0555556	0.131129
tr|Q8IBM9|Q8IBM9_PLAF7	Q8IBM9	PF3D7_0722400	Obg-like ATPase 1 OS=Plasmodium falciparum (isolate 3D7) OX=36329 GN=PF3D7_0722400 PE=3 SV=1	1140.46	0	23	tr|Q8IBM9|Q8IBM9_PLAF7	1.17712e+08	7.42908e+07	8.62197e+07	6.82724e+07	7.0589e+07	7.85567e+07	8.62197e+07	7.0589e+07	0.241891	0.074438	-0.288576	0.0392157	0.0392157	0.131783
tr|C0H4W6|C0H4W6_PLAF7	C0H4W6	PF3D7_0821800	Protein transport protein Sec61 subunit beta OS=Plasmodium falciparum (isolate 3D7) OX=36329 GN=PF3D7_0821800 PE=3 SV=1	163.25	0	4	tr|C0H4W6|C0H4W6_PLAF7	7.54746e+06	1.2584e+07	1.09722e+07	1.43893e+07	1.32147e+07	1.18125e+07	1.09722e+07	1.32147e+07	0.248081	0.0981896	0.268294	0	0	0.131895
tr|A0A144A0A4|A0A144A0A4_PLAF7	A0A144A0A4	PF3D7_1116200.1	Pyridoxine biosynthesis protein PDX2 OS=Plasmodium falciparum (isolate 3D7) OX=36329 GN=PF3D7_1116200.1 PE=4 SV=1	191.1	0	6	tr|A0A144A0A4|A0A144A0A4_PLAF7	8.46987e+06	6.34859e+06	6.319e+06	5.87936e+06	5.53412e+06	6.07533e+06	6.34859e+06	5.87936e+06	0.175047	0.047004	-0.110776	0.047619	0.0952381	0.132112
tr|Q8IBF1|Q8IBF1_PLAF7	Q8IBF1	PF3D7_0731100	EMP1-trafficking protein OS=Plasmodium falciparum (isolate 3D7) OX=36329 GN=PF3D7_0731100 PE=4 SV=1	32.63	0.00876601	2	tr|Q8IBF1|Q8IBF1_PLAF7	172717	367622	228136	372291	298499	366359	228136	366359	0.392055	0.118591	0.683362	0	0	0.133207
tr|Q8IKG9|Q8IKG9_PLAF7	Q8IKG9	PF3D7_1466800	NOC3p domain-containing protein OS=Plasmodium falciparum (isolate 3D7) OX=36329 GN=PF3D7_1466800 PE=4 SV=1	122.24	0	3	tr|Q8IKG9|Q8IKG9_PLAF7	760419	2.42909e+06	2.87053e+06	3.28148e+06	2.97862e+06	3.27615e+06	2.42909e+06	3.27615e+06	0.55096	0.0545309	0.431584	0	0	0.133465
tr|Q8I4Q9|Q8I4Q9_PLAF7	Q8I4Q9	PF3D7_1252700	PRESAN domain-containing protein OS=Plasmodium falciparum (isolate 3D7) OX=36329 GN=PF3D7_1252700 PE=4 SV=1	114.92	0	2	tr|Q8I4Q9|Q8I4Q9_PLAF7	426380	293042	272295	295726	230163	235620	293042	235620	0.252949	0.14332	-0.314644	0	0	0.133978
tr|C0H490|C0H490_PLAF7	C0H490	PF3D7_0406400	Cytosolic glyoxalase II OS=Plasmodium falciparum (isolate 3D7) OX=36329 GN=PF3D7_0406400 PE=3 SV=1	351.33	0	11	tr|C0H490|C0H490_PLAF7	2.09948e+07	1.65952e+07	1.93269e+07	1.54892e+07	1.50471e+07	1.77173e+07	1.93269e+07	1.54892e+07	0.117073	0.0889805	-0.319351	0.0277778	0	0.134122
tr|Q8I5B5|Q8I5B5_PLAF7	Q8I5B5	PF3D7_1230500	WD repeat-containing protein, putative OS=Plasmodium falciparum (isolate 3D7) OX=36329 GN=PF3D7_1230500 PE=4 SV=1	36.2	0.00557103	2	tr|Q8I5B5|Q8I5B5_PLAF7	111019	287947	223437	269059	304793	306213	223437	304793	0.431577	0.0717655	0.447964	0	0	0.134165
tr|Q8IKF0|Q8IKF0_PLAF7	Q8IKF0	PF3D7_1468700	Eukaryotic initiation factor 4A OS=Plasmodium falciparum (isolate 3D7) OX=36329 GN=PF3D7_1468700 PE=3 SV=1	3262.15	0	38	tr|Q8IKF0|Q8IKF0_PLAF7	6.82611e+08	6.26599e+08	6.48965e+08	5.43376e+08	5.57216e+08	6.2147e+08	6.48965e+08	5.57216e+08	0.0431951	0.0725949	-0.219905	0.0625	0.05	0.134252
tr|Q8IJ30|Q8IJ30_PLAF7	Q8IJ30	PF3D7_1037700	Enhancer of rudimentary homolog OS=Plasmodium falciparum (isolate 3D7) OX=36329 GN=PF3D7_1037700 PE=3 SV=1	77	0.000873362	2	tr|Q8IJ30|Q8IJ30_PLAF7	2.94776e+06	3.7012e+06	2.74165e+06	4.82367e+06	3.60567e+06	3.39285e+06	2.94776e+06	3.60567e+06	0.161372	0.195907	0.290651	0	0	0.134918
tr|O97227|O97227_PLAF7	O97227	PF3D7_0303700	Dihydrolipoamide acetyltransferase component of pyruvate dehydrogenase complex OS=Plasmodium falciparum (isolate 3D7) OX=36329 GN=PF3D7_0303700 PE=3 SV=1	143.1	0	5	tr|O97227|O97227_PLAF7	1.38704e+06	2.57714e+06	2.20978e+06	3.02423e+06	2.72637e+06	2.35819e+06	2.20978e+06	2.72637e+06	0.296113	0.123436	0.30308	0.0666667	0	0.135236
tr|Q8ILZ3|Q8ILZ3_PLAF7	Q8ILZ3	PF3D7_1410200	CTP synthase OS=Plasmodium falciparum (isolate 3D7) OX=36329 GN=PF3D7_1410200 PE=3 SV=1	657.11	0	17	tr|Q8ILZ3|Q8ILZ3_PLAF7	1.81001e+07	1.63473e+07	1.72276e+07	1.5165e+07	1.4537e+07	1.59592e+07	1.72276e+07	1.5165e+07	0.0508799	0.0468252	-0.183977	0	0	0.13526
tr|C6S3B4|C6S3B4_PLAF7	C6S3B4	PF3D7_0209400	DUF89 domain-containing protein OS=Plasmodium falciparum (isolate 3D7) OX=36329 GN=PF3D7_0209400 PE=4 SV=1	153.01	0	6	tr|C6S3B4|C6S3B4_PLAF7	1.95473e+06	2.14884e+06	1.98622e+06	1.6724e+06	1.7634e+06	1.91582e+06	1.98622e+06	1.7634e+06	0.0513204	0.068948	-0.171671	0.111111	0.111111	0.135375
tr|Q8I231|Q8I231_PLAF7	Q8I231	PF3D7_0111500	UMP-CMP kinase, putative OS=Plasmodium falciparum (isolate 3D7) OX=36329 GN=PF3D7_0111500 PE=3 SV=1	327.45	0	11	tr|Q8I231|Q8I231_PLAF7	8.84857e+06	8.17039e+06	8.09751e+06	7.41628e+06	7.0975e+06	7.71745e+06	8.17039e+06	7.41628e+06	0.0494719	0.041835	-0.13971	0	0	0.135484
tr|Q8IC15|Q8IC15_PLAF7	Q8IC15	PF3D7_0705500	Inositol-phosphate phosphatase, putative OS=Plasmodium falciparum (isolate 3D7) OX=36329 GN=PF3D7_0705500 PE=4 SV=1	58.92	0.000812348	2	tr|Q8IC15|Q8IC15_PLAF7	146410	140968	139988	209082	196855	135658	140968	196855	0.0242864	0.21791	0.481767	0	0.166667	0.135545
tr|Q8I3Y8|Q8I3Y8_PLAF7	Q8I3Y8	PF3D7_0511800	Inositol-3-phosphate synthase OS=Plasmodium falciparum (isolate 3D7) OX=36329 GN=PF3D7_0511800 PE=4 SV=1	2330.08	0	49	tr|Q8I3Y8|Q8I3Y8_PLAF7	2.85227e+08	2.73578e+08	2.8747e+08	2.52039e+08	2.46582e+08	2.56903e+08	2.85227e+08	2.52039e+08	0.0264385	0.0205014	-0.178461	0.0355556	0.0222222	0.135912
tr|A0A144A6N0|A0A144A6N0_PLAF7	A0A144A6N0	PF3D7_1453800	Glucose-6-phosphate dehydrogenase-6-phosphogluconolactonase OS=Plasmodium falciparum (isolate 3D7) OX=36329 GN=PF3D7_1453800 PE=3 SV=1	438.83	0	14	tr|A0A144A6N0|A0A144A6N0_PLAF7	1.08519e+07	7.70699e+06	9.25241e+06	6.67336e+06	7.31045e+06	8.59734e+06	9.25241e+06	7.31045e+06	0.169627	0.130211	-0.339869	0.0625	0	0.136488
tr|Q8IHT3|Q8IHT3_PLAF7	Q8IHT3	PF3D7_1143300	DNA-directed RNA polymerases I and III subunit RPAC1, putative OS=Plasmodium falciparum (isolate 3D7) OX=36329 GN=PF3D7_1143300 PE=4 SV=1	147.54	0	3	tr|Q8IHT3|Q8IHT3_PLAF7	1.68389e+06	2.50756e+06	1.40947e+06	2.72655e+06	2.16364e+06	2.32395e+06	1.68389e+06	2.32395e+06	0.3061	0.120603	0.464777	0.111111	0.111111	0.136569
tr|A0A143ZZK9|A0A143ZZK9_PLAF7	A0A143ZZK9	PF3D7_1211900	Non-SERCA-type Ca2+-transporting P-ATPase OS=Plasmodium falciparum (isolate 3D7) OX=36329 GN=PF3D7_1211900 PE=3 SV=1	1717.52	0	41	tr|A0A143ZZK9|A0A143ZZK9_PLAF7	7.80324e+07	6.16632e+07	5.94951e+07	8.40339e+07	7.481e+07	7.57021e+07	6.16632e+07	7.57021e+07	0.15264	0.0650722	0.295925	0.0272109	0.00680272	0.136793
tr|Q8ILM6|Q8ILM6_PLAF7	Q8ILM6	PF3D7_1422700	Uncharacterized protein OS=Plasmodium falciparum (isolate 3D7) OX=36329 GN=PF3D7_1422700 PE=4 SV=1	87.27	0	4	tr|Q8ILM6|Q8ILM6_PLAF7	496322	505352	601824	563093	736518	618601	505352	618601	0.10941	0.13851	0.291722	0	0	0.137237
tr|Q8IHU4|Q8IHU4_PLAF7	Q8IHU4	PF3D7_1142100	J domain-containing protein OS=Plasmodium falciparum (isolate 3D7) OX=36329 GN=PF3D7_1142100 PE=4 SV=1	63.47	0.00082713	2	tr|Q8IHU4|Q8IHU4_PLAF7	463386	577305	437012	665672	663821	496538	463386	663821	0.15137	0.159559	0.518582	0	0	0.137632
tr|Q8IBN8|Q8IBN8_PLAF7	Q8IBN8	PF3D7_0721300	RNA helicase OS=Plasmodium falciparum (isolate 3D7) OX=36329 GN=PF3D7_0721300 PE=3 SV=1	70.49	0.000849618	3	tr|Q8IBN8|Q8IBN8_PLAF7	451991	333454	369258	456732	429712	471586	369258	456732	0.157955	0.0468981	0.30672	0	0	0.137972
tr|Q8IJJ5|Q8IJJ5_PLAF7	Q8IJJ5	PF3D7_1020700	RNA cytidine acetyltransferase OS=Plasmodium falciparum (isolate 3D7) OX=36329 GN=PF3D7_1020700 PE=3 SV=1	242.77	0	5	tr|Q8IJJ5|Q8IJJ5_PLAF7	1.06161e+06	1.20293e+06	1.07657e+06	1.09898e+06	1.63565e+06	1.40073e+06	1.07657e+06	1.40073e+06	0.0697061	0.195164	0.379739	0.047619	0.047619	0.138077
tr|Q8IE69|Q8IE69_PLAF7	Q8IE69	PF3D7_1324800	Dihydrofolate synthase/folylpolyglutamate synthase OS=Plasmodium falciparum (isolate 3D7) OX=36329 GN=PF3D7_1324800 PE=4 SV=1	191.36	0	5	tr|Q8IE69|Q8IE69_PLAF7	1.43137e+06	645435	833087	594001	702475	651114	833087	651114	0.423166	0.0835844	-0.355557	0.222222	0.333333	0.140688
tr|Q8IAQ5|Q8IAQ5_PLAF7	Q8IAQ5	PF3D7_0806500	DnaJ protein, putative OS=Plasmodium falciparum (isolate 3D7) OX=36329 GN=PF3D7_0806500 PE=4 SV=1	96.43	0	3	tr|Q8IAQ5|Q8IAQ5_PLAF7	784440	841664	847824	732928	779187	660992	841664	732928	0.0423849	0.0822239	-0.199572	0.111111	0.111111	0.141022
tr|C6KT11|C6KT11_PLAF7	C6KT11	PF3D7_0617000	Mitochondrial import receptor subunit TOM40,putative OS=Plasmodium falciparum (isolate 3D7) OX=36329 GN=PF3D7_0617000 PE=4 SV=1	391.36	0	9	tr|C6KT11|C6KT11_PLAF7	9.43327e+06	6.47486e+06	7.06329e+06	9.4123e+06	8.36885e+06	1.01025e+07	7.06329e+06	9.4123e+06	0.204523	0.0939052	0.414207	0.0277778	0	0.141805
tr|C0H4L5|C0H4L5_PLAF7	C0H4L5	PF3D7_0706400	Ribosomal protein L37 OS=Plasmodium falciparum (isolate 3D7) OX=36329 GN=PF3D7_0706400 PE=1 SV=1	236.96	0	7	tr|C0H4L5|C0H4L5_PLAF7	2.4318e+07	2.04243e+07	2.12798e+07	2.09609e+07	1.87879e+07	1.67389e+07	2.12798e+07	1.87879e+07	0.0929819	0.112127	-0.179682	0	0	0.142154
tr|Q8IBU1|Q8IBU1_PLAF7	Q8IBU1	PF3D7_0715900	Zinc transporter, putative OS=Plasmodium falciparum (isolate 3D7) OX=36329 GN=PF3D7_0715900 PE=4 SV=1	67.33	0.000838926	2	tr|Q8IBU1|Q8IBU1_PLAF7	420905	535265	520041	578031	560614	566779	520041	566779	0.126199	0.0155356	0.124163	0	0	0.143001
tr|Q8I2I2|Q8I2I2_PLAF7	Q8I2I2	PF3D7_0933600	Mitochondrial-processing peptidase subunit beta,putative OS=Plasmodium falciparum (isolate 3D7) OX=36329 GN=PF3D7_0933600 PE=3 SV=1	349.2	0	11	tr|Q8I2I2|Q8I2I2_PLAF7	5.38754e+06	4.35541e+06	4.34198e+06	5.91038e+06	5.07459e+06	5.44203e+06	4.35541e+06	5.44203e+06	0.127757	0.0765044	0.321335	0	0	0.143364
tr|Q8IL11|Q8IL11_PLAF7	Q8IL11	PF3D7_1446200	M17 leucyl aminopeptidase OS=Plasmodium falciparum (isolate 3D7) OX=36329 GN=PF3D7_1446200 PE=1 SV=1	1538.3	0	28	tr|Q8IL11|Q8IL11_PLAF7	3.2218e+08	2.36101e+08	2.60094e+08	2.2858e+08	2.25367e+08	2.33601e+08	2.60094e+08	2.2858e+08	0.162842	0.0181068	-0.186337	0.0232558	0.0232558	0.143401
tr|Q8I3T4|Q8I3T4_PLAF7	Q8I3T4	PF3D7_0517400	FACT complex subunit SPT16, putative OS=Plasmodium falciparum (isolate 3D7) OX=36329 GN=PF3D7_0517400 PE=4 SV=1	1377.44	0	33	tr|Q8I3T4|Q8I3T4_PLAF7	4.22982e+07	3.93759e+07	3.96547e+07	4.38095e+07	4.5169e+07	4.72237e+07	3.96547e+07	4.5169e+07	0.0398765	0.0378594	0.18784	0.0263158	0.0175439	0.143881
tr|A0A143ZW95|A0A143ZW95_PLAF7	A0A143ZW95	PF3D7_0608310	Sorting assembly machinery 50 kDa subunit,putative OS=Plasmodium falciparum (isolate 3D7) OX=36329 GN=PF3D7_0608310 PE=4 SV=1	176.16	0	4	tr|A0A143ZW95|A0A143ZW95_PLAF7	1.00812e+06	1.43084e+06	1.28587e+06	1.78905e+06	1.41701e+06	1.37399e+06	1.28587e+06	1.41701e+06	0.173007	0.149496	0.140111	0	0	0.144685
tr|Q8IDT3|Q8IDT3_PLAF7	Q8IDT3	PF3D7_1340300	Nucleolar complex protein 2, putative OS=Plasmodium falciparum (isolate 3D7) OX=36329 GN=PF3D7_1340300 PE=4 SV=1	58.08	0.000808407	2	tr|Q8IDT3|Q8IDT3_PLAF7	1.24311e+06	1.14781e+06	1.23184e+06	888918	1.00622e+06	1.20464e+06	1.23184e+06	1.00622e+06	0.0431246	0.154452	-0.291873	0	0	0.14734
tr|Q8IBH9|Q8IBH9_PLAF7	Q8IBH9	PF3D7_0727800	Cation transporting ATPase, putative OS=Plasmodium falciparum (isolate 3D7) OX=36329 GN=PF3D7_0727800 PE=4 SV=1	445.71	0	11	tr|Q8IBH9|Q8IBH9_PLAF7	3.39642e+06	3.37576e+06	3.08777e+06	3.88858e+06	3.61823e+06	3.59626e+06	3.37576e+06	3.61823e+06	0.052499	0.0439878	0.10007	0	0	0.147346
tr|Q8IL94|Q8IL94_PLAF7	Q8IL94	PF3D7_1437200	Ribonucleoside-diphosphate reductase OS=Plasmodium falciparum (isolate 3D7) OX=36329 GN=PF3D7_1437200 PE=3 SV=1	1562.57	0	34	tr|Q8IL94|Q8IL94_PLAF7	5.48438e+07	5.37901e+07	5.80935e+07	3.98555e+07	4.90192e+07	5.38603e+07	5.48438e+07	4.90192e+07	0.0403615	0.149494	-0.161983	0.0396825	0.0238095	0.14871
tr|Q8I613|Q8I613_PLAF7	Q8I613	PF3D7_1203200	Signal recognition particle subunit SRP14 OS=Plasmodium falciparum (isolate 3D7) OX=36329 GN=PF3D7_1203200 PE=4 SV=1	92.84	0	2	tr|Q8I613|Q8I613_PLAF7	5.99302e+06	3.78376e+06	3.74106e+06	3.30678e+06	3.48475e+06	3.62631e+06	3.78376e+06	3.48475e+06	0.285849	0.0461055	-0.118765	0	0	0.149379
tr|C6KTB8|C6KTB8_PLAF7	C6KTB8	PF3D7_0628200	Eukaryotic translation initiation factor 2-alpha kinase OS=Plasmodium falciparum (isolate 3D7) OX=36329 GN=PF3D7_0628200 PE=4 SV=1	176.65	0	5	tr|C6KTB8|C6KTB8_PLAF7	375712	509141	511911	529101	548722	570758	509141	548722	0.167202	0.0379237	0.108011	0	0	0.149622
tr|Q8ILQ6|Q8ILQ6_PLAF7	Q8ILQ6	PF3D7_1419400	Uncharacterized protein OS=Plasmodium falciparum (isolate 3D7) OX=36329 GN=PF3D7_1419400 PE=4 SV=2	112.03	0	4	tr|Q8ILQ6|Q8ILQ6_PLAF7	532253	221973	277327	152827	265513	224171	277327	224171	0.481289	0.266168	-0.306987	0.25	0.166667	0.149632
tr|Q8IL80|Q8IL80_PLAF7	Q8IL80	PF3D7_1438900	Thioredoxin peroxidase 1 OS=Plasmodium falciparum (isolate 3D7) OX=36329 GN=PF3D7_1438900 PE=4 SV=1	1032.48	0	13	tr|Q8IL80|Q8IL80_PLAF7	2.84273e+08	2.40808e+08	2.49856e+08	2.17103e+08	2.17409e+08	2.42198e+08	2.49856e+08	2.17409e+08	0.0887807	0.0638419	-0.200684	0.0769231	0.102564	0.149687
tr|Q8IKW4|Q8IKW4_PLAF7	Q8IKW4	PF3D7_1451200	Uncharacterized protein OS=Plasmodium falciparum (isolate 3D7) OX=36329 GN=PF3D7_1451200 PE=4 SV=1	107.71	0	4	tr|Q8IKW4|Q8IKW4_PLAF7	4.87346e+06	528008	423016	330746	374277	376704	528008	374277	1.30812	0.0717242	-0.496453	0.2	0	0.150186
tr|O96215|O96215_PLAF7	O96215	PF3D7_0213500	TPR_REGION domain-containing protein OS=Plasmodium falciparum (isolate 3D7) OX=36329 GN=PF3D7_0213500 PE=4 SV=2	42.11	0.00363901	1	tr|O96215|O96215_PLAF7	148625	6316.89	92073.4	177397	139186	183000	92073.4	177397	0.870211	0.143182	0.946124	0.333333	0	0.151266
tr|Q8IKW5|Q8IKW5_PLAF7	Q8IKW5	PF3D7_1451100	Elongation factor 2 OS=Plasmodium falciparum (isolate 3D7) OX=36329 GN=PF3D7_1451100 PE=4 SV=1	5317.67	0	67	tr|Q8IKW5|Q8IKW5_PLAF7	1.31424e+09	1.18458e+09	1.26248e+09	1.14546e+09	1.05418e+09	1.14179e+09	1.26248e+09	1.14179e+09	0.0520606	0.0463941	-0.144959	0.0101781	0.00763359	0.151438
tr|Q8I5F4|Q8I5F4_PLAF7	Q8I5F4	PF3D7_1226300	Haloacid dehalogenase-like hydrolase, putative OS=Plasmodium falciparum (isolate 3D7) OX=36329 GN=PF3D7_1226300 PE=4 SV=1	963.85	0	20	tr|Q8I5F4|Q8I5F4_PLAF7	9.22142e+07	7.51165e+07	8.95365e+07	6.51504e+07	7.16859e+07	8.18294e+07	8.95365e+07	7.16859e+07	0.107406	0.115303	-0.320786	0.0246914	0.037037	0.151482
tr|Q8I257|Q8I257_PLAF7	Q8I257	PF3D7_0108500	ELM2 domain-containing protein OS=Plasmodium falciparum (isolate 3D7) OX=36329 GN=PF3D7_0108500 PE=4 SV=1	90.25	0	2	tr|Q8I257|Q8I257_PLAF7	3.65539e+07	4.30372e+07	3.63234e+07	3.53226e+07	3.51201e+07	2.89667e+07	3.65539e+07	3.51201e+07	0.0986449	0.109021	-0.0577269	0	0	0.152392
tr|Q8IBI3|Q8IBI3_PLAF7	Q8IBI3	PF3D7_0727400	Proteasome subunit alpha type OS=Plasmodium falciparum (isolate 3D7) OX=36329 GN=PF3D7_0727400 PE=1 SV=1	1148.25	0	19	tr|Q8IBI3|Q8IBI3_PLAF7	9.59726e+07	6.82506e+07	6.71833e+07	6.16715e+07	6.39589e+07	6.36569e+07	6.82506e+07	6.36569e+07	0.211603	0.0196948	-0.100525	0.0133333	0	0.152902
tr|Q8I2Z8|Q8I2Z8_PLAF7	Q8I2Z8	PF3D7_0915400	Probable ATP-dependent 6-phosphofructokinase OS=Plasmodium falciparum (isolate 3D7) OX=36329 GN=PF3D7_0915400 PE=3 SV=1	4841.02	0	85	tr|Q8I2Z8|Q8I2Z8_PLAF7	5.08324e+08	4.56316e+08	5.1051e+08	4.30779e+08	4.16098e+08	4.58877e+08	5.08324e+08	4.30779e+08	0.0623883	0.0499416	-0.2388	0.0230769	0.0153846	0.152919
tr|Q8I3A9|Q8I3A9_PLAF7	Q8I3A9	PF3D7_0904000	GTPase-activating protein, putative OS=Plasmodium falciparum (isolate 3D7) OX=36329 GN=PF3D7_0904000 PE=4 SV=1	352.15	0	9	tr|Q8I3A9|Q8I3A9_PLAF7	6.03253e+06	6.11256e+06	5.79144e+06	4.77732e+06	5.4831e+06	5.5972e+06	6.03253e+06	5.4831e+06	0.0279583	0.0840164	-0.13777	0	0	0.153345
tr|A0A146M1U1|A0A146M1U1_PLAF7	A0A146M1U1	PF3D7_0803600.1	GRAM domain-containing protein OS=Plasmodium falciparum (isolate 3D7) OX=36329 GN=PF3D7_0803600.1 PE=4 SV=1	46.98	0.00149925	1	tr|A0A146M1U1|A0A146M1U1_PLAF7	16233.8	614997	672976	1.5132e+06	803528	786883	614997	803528	0.836349	0.400778	0.385769	0.333333	0.444444	0.153365
tr|Q8IJF2|Q8IJF2_PLAF7	Q8IJF2	PF3D7_1025300	Uncharacterized protein OS=Plasmodium falciparum (isolate 3D7) OX=36329 GN=PF3D7_1025300 PE=4 SV=2	197.21	0	6	tr|Q8IJF2|Q8IJF2_PLAF7	2.32098e+06	1.72877e+06	1.83879e+06	2.31008e+06	2.18022e+06	2.37911e+06	1.83879e+06	2.31008e+06	0.160479	0.0441016	0.329185	0	0	0.153714
tr|Q8I566|Q8I566_PLAF7	Q8I566	PF3D7_1235600	Serine hydroxymethyltransferase OS=Plasmodium falciparum (isolate 3D7) OX=36329 GN=PF3D7_1235600 PE=1 SV=1	1526.69	0	28	tr|Q8I566|Q8I566_PLAF7	1.02876e+08	1.04073e+08	1.0849e+08	9.468e+07	9.57809e+07	9.30487e+07	1.04073e+08	9.468e+07	0.0281238	0.0145465	-0.13647	0.0333333	0.025	0.155567
tr|Q8II71|Q8II71_PLAF7	Q8II71	PF3D7_1129200	26S proteasome regulatory subunit RPN7,putative OS=Plasmodium falciparum (isolate 3D7) OX=36329 GN=PF3D7_1129200 PE=4 SV=2	281.1	0	8	tr|Q8II71|Q8II71_PLAF7	1.44651e+07	1.17354e+07	1.31401e+07	1.10556e+07	1.13179e+07	1.19434e+07	1.31401e+07	1.13179e+07	0.104094	0.0398736	-0.215372	0	0	0.157357
tr|Q8IJC0|Q8IJC0_PLAF7	Q8IJC0	PF3D7_1028400	Nucleolar preribosomal assembly protein,putative OS=Plasmodium falciparum (isolate 3D7) OX=36329 GN=PF3D7_1028400 PE=4 SV=1	216.12	0	5	tr|Q8IJC0|Q8IJC0_PLAF7	4.02451e+06	5.85548e+06	6.05965e+06	6.09508e+06	6.39626e+06	6.7467e+06	5.85548e+06	6.39626e+06	0.210928	0.0508555	0.127442	0.047619	0.0952381	0.157963
tr|Q8IIH7|Q8IIH7_PLAF7	Q8IIH7	PF3D7_1119000	Acyl-CoA-binding protein, putative OS=Plasmodium falciparum (isolate 3D7) OX=36329 GN=PF3D7_1119000 PE=4 SV=1	261.99	0	8	tr|Q8IIH7|Q8IIH7_PLAF7	7.77306e+06	8.81901e+06	1.01935e+07	1.05277e+07	1.008e+07	1.02058e+07	8.81901e+06	1.02058e+07	0.135961	0.0224776	0.210706	0	0	0.158447
tr|O77367|O77367_PLAF7	O77367	PF3D7_0319100	E3 ubiquitin-protein ligase RBX1, putative OS=Plasmodium falciparum (isolate 3D7) OX=36329 GN=PF3D7_0319100 PE=4 SV=3	44.97	0.00148258	1	tr|O77367|O77367_PLAF7	1.64235e+06	1.31195e+06	1.02255e+06	1.10725e+06	1.11496e+06	914847	1.31195e+06	1.10725e+06	0.233946	0.108421	-0.244722	0	0	0.158616
tr|Q8IBV0|Q8IBV0_PLAF7	Q8IBV0	PF3D7_0715000	4-nitrophenylphosphatase OS=Plasmodium falciparum (isolate 3D7) OX=36329 GN=PF3D7_0715000 PE=4 SV=1	138.25	0	3	tr|Q8IBV0|Q8IBV0_PLAF7	9.12333e+06	8.42518e+06	9.87499e+06	7.9544e+06	7.66129e+06	8.5364e+06	9.12333e+06	7.9544e+06	0.0793195	0.0553282	-0.197807	0	0	0.158792
tr|Q8IHT2|Q8IHT2_PLAF7	Q8IHT2	PF3D7_1143400	Translation initiation factor eIF-1A, putative OS=Plasmodium falciparum (isolate 3D7) OX=36329 GN=PF3D7_1143400 PE=3 SV=2	269.39	0	8	tr|Q8IHT2|Q8IHT2_PLAF7	1.63165e+07	1.3372e+07	1.3813e+07	1.21144e+07	1.26175e+07	1.31884e+07	1.3813e+07	1.26175e+07	0.10952	0.0425134	-0.130601	0	0	0.159733
tr|Q8I5L3|Q8I5L3_PLAF7	Q8I5L3	PF3D7_1219900	Ribulose-phosphate 3-epimerase OS=Plasmodium falciparum (isolate 3D7) OX=36329 GN=PF3D7_1219900 PE=1 SV=1	179.72	0	4	tr|Q8I5L3|Q8I5L3_PLAF7	7.50871e+06	6.21058e+06	6.92121e+06	5.83679e+06	5.56199e+06	6.53853e+06	6.92121e+06	5.83679e+06	0.0944801	0.084224	-0.245849	0	0	0.159831
tr|Q9U0I2|Q9U0I2_PLAF7	Q9U0I2	PF3D7_0410600	Uncharacterized protein OS=Plasmodium falciparum (isolate 3D7) OX=36329 GN=PF3D7_0410600 PE=4 SV=2	554.34	0	11	tr|Q9U0I2|Q9U0I2_PLAF7	1.06805e+07	9.81405e+06	1.16714e+07	8.94236e+06	9.63742e+06	9.7272e+06	1.06805e+07	9.63742e+06	0.0866788	0.0455252	-0.14826	0.0238095	0	0.160639
tr|Q8IM64|Q8IM64_PLAF7	Q8IM64	PF3D7_1402500	Ubiquitin-40S ribosomal protein S27a, putative OS=Plasmodium falciparum (isolate 3D7) OX=36329 GN=PF3D7_1402500 PE=4 SV=1	184.24	0	4	tr|Q8IM64|Q8IM64_PLAF7	6.78934e+07	6.83738e+07	7.07858e+07	6.60009e+07	6.20627e+07	5.55444e+07	6.83738e+07	6.20627e+07	0.0224573	0.0862873	-0.139716	0.047619	0	0.160886
tr|Q8I6S4|Q8I6S4_PLAF7	Q8I6S4	PF3D7_0804800	Peptidyl-prolyl cis-trans isomerase OS=Plasmodium falciparum (isolate 3D7) OX=36329 GN=PF3D7_0804800 PE=3 SV=1	54.59	0.000789889	2	tr|Q8I6S4|Q8I6S4_PLAF7	3.99892e+06	2.56454e+06	2.70377e+06	2.36414e+06	2.45431e+06	2.54455e+06	2.70377e+06	2.45431e+06	0.25607	0.0367528	-0.139654	0	0	0.161147
tr|Q8IBJ8|Q8IBJ8_PLAF7	Q8IBJ8	PF3D7_0725300	Uncharacterized protein OS=Plasmodium falciparum (isolate 3D7) OX=36329 GN=PF3D7_0725300 PE=4 SV=1	143.14	0	4	tr|Q8IBJ8|Q8IBJ8_PLAF7	431969	876950	860950	1.02918e+06	1.02438e+06	834203	860950	1.02438e+06	0.348986	0.115533	0.250744	0	0.166667	0.161572
tr|Q8IL88|Q8IL88_PLAF7	Q8IL88	PF3D7_1437900	HSP40, subfamily A, putative OS=Plasmodium falciparum (isolate 3D7) OX=36329 GN=PF3D7_1437900 PE=4 SV=1	2982.75	0	44	tr|Q8IL88|Q8IL88_PLAF7	3.01635e+08	2.64701e+08	2.79866e+08	2.49269e+08	2.40836e+08	2.61761e+08	2.79866e+08	2.49269e+08	0.0658188	0.0420076	-0.167033	0.0632911	0.0590717	0.1618
tr|Q8I1V1|Q8I1V1_PLAF7	Q8I1V1	PF3D7_0413600	26S protease regulatory subunit 6B, putative OS=Plasmodium falciparum (isolate 3D7) OX=36329 GN=PF3D7_0413600 PE=3 SV=1	1061.27	0	18	tr|Q8I1V1|Q8I1V1_PLAF7	3.51169e+07	3.17828e+07	3.2719e+07	3.0051e+07	2.88185e+07	3.03394e+07	3.2719e+07	3.0051e+07	0.0517859	0.0271669	-0.122716	0	0	0.165356
tr|C6KTF8|C6KTF8_PLAF7	C6KTF8	PF3D7_0632700	Rifin OS=Plasmodium falciparum (isolate 3D7) OX=36329 GN=PF3D7_0632700 PE=4 SV=1	348.37	0	7	tr|C6KTF8|C6KTF8_PLAF7	1.15735e+07	1.04868e+07	9.57943e+06	1.70676e+07	1.14579e+07	1.12547e+07	1.04868e+07	1.14579e+07	0.0946631	0.248791	0.127779	0.037037	0	0.165754
tr|O97256|O97256_PLAF7	O97256	PF3D7_0308500	Activator of Hsp90 ATPase, putative OS=Plasmodium falciparum (isolate 3D7) OX=36329 GN=PF3D7_0308500 PE=4 SV=2	209.65	0	5	tr|O97256|O97256_PLAF7	7.50823e+06	5.30131e+06	6.15672e+06	4.79306e+06	5.25082e+06	5.73626e+06	6.15672e+06	5.25082e+06	0.176004	0.0896701	-0.229619	0	0	0.166194
tr|O96169|O96169_PLAF7	O96169	PF3D7_0208200	KRR1 small subunit processome component OS=Plasmodium falciparum (isolate 3D7) OX=36329 GN=PF3D7_0208200 PE=3 SV=1	42.45	0.00291545	2	tr|O96169|O96169_PLAF7	213333	395147	345525	489752	443999	329776	345525	443999	0.295534	0.195629	0.361766	0	0	0.166505
tr|Q8IM11|Q8IM11_PLAF7	Q8IM11	PF3D7_1408500	Uncharacterized protein OS=Plasmodium falciparum (isolate 3D7) OX=36329 GN=PF3D7_1408500 PE=4 SV=1	58.31	0.000809717	3	tr|Q8IM11|Q8IM11_PLAF7	1.67799e+06	2.03038e+06	1.95661e+06	2.14886e+06	2.14565e+06	2.10623e+06	1.95661e+06	2.14565e+06	0.0984216	0.0111257	0.133057	0	0	0.166677
tr|Q8I383|Q8I383_PLAF7	Q8I383	PF3D7_0906600	Zinc finger protein, putative OS=Plasmodium falciparum (isolate 3D7) OX=36329 GN=PF3D7_0906600 PE=4 SV=1	222.54	0	9	tr|Q8I383|Q8I383_PLAF7	4.27433e+06	3.90937e+06	3.48542e+06	4.25324e+06	4.49523e+06	4.46478e+06	3.90937e+06	4.46478e+06	0.101504	0.0299251	0.191651	0.0740741	0.037037	0.167192
tr|Q8I6T7|Q8I6T7_PLAF7	Q8I6T7	PF3D7_1311300	ATP synthase subunit gamma OS=Plasmodium falciparum (isolate 3D7) OX=36329 GN=PF3D7_1311300 PE=3 SV=1	53.41	0.000785546	1	tr|Q8I6T7|Q8I6T7_PLAF7	2087.2	113442	119958	254694	210632	100353	113442	210632	0.844019	0.421632	0.892769	0	0	0.167373
tr|C0H531|C0H531_PLAF7	C0H531	PF3D7_0910900	DNA primase large subunit OS=Plasmodium falciparum (isolate 3D7) OX=36329 GN=PF3D7_0910900 PE=3 SV=1	240.82	0	6	tr|C0H531|C0H531_PLAF7	2.98324e+06	2.14738e+06	2.40497e+06	2.03662e+06	2.16131e+06	2.16303e+06	2.40497e+06	2.16131e+06	0.170415	0.0341883	-0.154116	0	0	0.167764
tr|C0H4M1|C0H4M1_PLAF7	C0H4M1	PF3D7_0707400	AAA family ATPase, putative OS=Plasmodium falciparum (isolate 3D7) OX=36329 GN=PF3D7_0707400 PE=4 SV=1	552.04	0	15	tr|C0H4M1|C0H4M1_PLAF7	7.20734e+06	6.52045e+06	6.39174e+06	7.64525e+06	7.54135e+06	7.29315e+06	6.52045e+06	7.54135e+06	0.0653815	0.0241434	0.209853	0.0185185	0	0.168299
tr|Q8IES0|Q8IES0_PLAF7	Q8IES0	PF3D7_1304500	Small heat shock protein, putative OS=Plasmodium falciparum (isolate 3D7) OX=36329 GN=PF3D7_1304500 PE=3 SV=1	710.3	0	11	tr|Q8IES0|Q8IES0_PLAF7	5.20038e+07	4.63504e+07	4.58236e+07	3.634e+07	4.38073e+07	4.52927e+07	4.63504e+07	4.38073e+07	0.0712916	0.114745	-0.0814101	0.0588235	0.0392157	0.168516
tr|Q8IEJ5|Q8IEJ5_PLAF7	Q8IEJ5	PF3D7_1312700	Uncharacterized protein OS=Plasmodium falciparum (isolate 3D7) OX=36329 GN=PF3D7_1312700 PE=4 SV=1	259.45	0	7	tr|Q8IEJ5|Q8IEJ5_PLAF7	5.83779e+06	5.6117e+06	5.02247e+06	5.7937e+06	6.29883e+06	6.53669e+06	5.6117e+06	6.29883e+06	0.0766612	0.0611013	0.166646	0.037037	0	0.168558
tr|A0A143ZWL6|A0A143ZWL6_PLAF7	A0A143ZWL6	PF3D7_0210200	Uncharacterized protein OS=Plasmodium falciparum (isolate 3D7) OX=36329 GN=PF3D7_0210200 PE=4 SV=1	110.24	0	2	tr|A0A143ZWL6|A0A143ZWL6_PLAF7	176590	111578	114954	47700.6	123632	105639	114954	105639	0.272368	0.429773	-0.121907	0.222222	0.333333	0.168741
tr|O77330|O77330_PLAF7	O77330	PF3D7_0309500	Asparagine synthetase [glutamine-hydrolyzing],putative OS=Plasmodium falciparum (isolate 3D7) OX=36329 GN=PF3D7_0309500 PE=4 SV=1	831.06	0	25	tr|O77330|O77330_PLAF7	2.30666e+07	2.14589e+07	2.4077e+07	1.90167e+07	1.96094e+07	2.20907e+07	2.30666e+07	1.96094e+07	0.0577382	0.0805787	-0.234258	0.037037	0.0617284	0.169039
tr|Q8IJN8|Q8IJN8_PLAF7	Q8IJN8	PF3D7_1015800	Ribonucleotide reductase small subunit,putative OS=Plasmodium falciparum (isolate 3D7) OX=36329 GN=PF3D7_1015800 PE=4 SV=2	554.65	0	14	tr|Q8IJN8|Q8IJN8_PLAF7	3.36881e+07	2.73592e+07	3.08065e+07	1.93431e+07	2.60061e+07	3.02155e+07	3.08065e+07	2.60061e+07	0.10349	0.217648	-0.244389	0.0185185	0	0.169044
tr|Q8I6Z8|Q8I6Z8_PLAF7	Q8I6Z8	PF3D7_1317000	U4/U6.U5 tri-snRNP-associated protein 2,putative OS=Plasmodium falciparum (isolate 3D7) OX=36329 GN=PF3D7_1317000 PE=4 SV=1	55.72	0.000796178	2	tr|Q8I6Z8|Q8I6Z8_PLAF7	1.47711e+06	566935	606063	553920	563222	477185	606063	553920	0.582504	0.088849	-0.129792	0	0	0.169374
tr|Q8IC05|Q8IC05_PLAF7	Q8IC05	PF3D7_0708400	Heat shock protein 90 OS=Plasmodium falciparum (isolate 3D7) OX=36329 GN=PF3D7_0708400 PE=1 SV=1	7899.39	0	78	tr|Q8IC05|Q8IC05_PLAF7	5.1061e+09	4.22955e+09	4.8117e+09	4.08016e+09	4.01921e+09	4.34619e+09	4.8117e+09	4.08016e+09	0.0945927	0.0419136	-0.237922	0.0251572	0.0283019	0.169907
tr|O97323|O97323_PLAF7	O97323	PF3D7_0320100	Protein transport protein SEC22 OS=Plasmodium falciparum (isolate 3D7) OX=36329 GN=PF3D7_0320100 PE=3 SV=2	86.57	0	3	tr|O97323|O97323_PLAF7	2.08701e+06	1.7815e+06	2.0346e+06	2.28986e+06	2.13516e+06	2.21842e+06	2.0346e+06	2.21842e+06	0.0830272	0.034964	0.124782	0	0	0.170106
tr|Q8I237|Q8I237_PLAF7	Q8I237	PF3D7_0110800	Transcription initiation factor TFIIB, putative OS=Plasmodium falciparum (isolate 3D7) OX=36329 GN=PF3D7_0110800 PE=4 SV=1	41.48	0.00362845	2	tr|Q8I237|Q8I237_PLAF7	441783	282873	291394	435878	376473	422652	291394	422652	0.263929	0.075762	0.536501	0	0	0.170298
tr|Q9TY96|Q9TY96_PLAF7	Q9TY96	PF3D7_0207500	Serine repeat antigen 6 OS=Plasmodium falciparum (isolate 3D7) OX=36329 GN=PF3D7_0207500 PE=1 SV=3	134.33	0	6	tr|Q9TY96|Q9TY96_PLAF7	2.37624e+06	2.64955e+06	2.30917e+06	1.75534e+06	2.43378e+06	2.08154e+06	2.37624e+06	2.08154e+06	0.0737436	0.162328	-0.191027	0	0	0.170753
tr|Q8IAT5|Q8IAT5_PLAF7	Q8IAT5	PF3D7_0810000	Acyl-CoA binding protein, putative OS=Plasmodium falciparum (isolate 3D7) OX=36329 GN=PF3D7_0810000 PE=4 SV=1	45.54	0.00148699	3	tr|Q8IAT5|Q8IAT5_PLAF7	3.42253e+06	2.50076e+06	1.89776e+06	2.2622e+06	2.06456e+06	1.45409e+06	2.50076e+06	2.06456e+06	0.294559	0.218615	-0.276529	0	0	0.171665
tr|Q8IK15|Q8IK15_PLAF7	Q8IK15	PF3D7_1002100	EMP1-trafficking protein OS=Plasmodium falciparum (isolate 3D7) OX=36329 GN=PF3D7_1002100 PE=4 SV=1	222.06	0	6	tr|Q8IK15|Q8IK15_PLAF7	3.52475e+06	3.71395e+06	2.5676e+06	3.80809e+06	4.0889e+06	3.69862e+06	3.52475e+06	3.80809e+06	0.188008	0.0520833	0.111549	0	0	0.172118
tr|Q8IKT2|Q8IKT2_PLAF7	Q8IKT2	PF3D7_1454700	6-phosphogluconate dehydrogenase, decarboxylating OS=Plasmodium falciparum (isolate 3D7) OX=36329 GN=PF3D7_1454700 PE=1 SV=1	977.8	0	19	tr|Q8IKT2|Q8IKT2_PLAF7	6.17844e+07	4.19822e+07	4.49009e+07	3.90556e+07	3.94169e+07	4.34989e+07	4.49009e+07	3.94169e+07	0.215724	0.0606948	-0.187928	0.0144928	0	0.172631
tr|Q8I517|Q8I517_PLAF7	Q8I517	PF3D7_1241200	Uncharacterized protein OS=Plasmodium falciparum (isolate 3D7) OX=36329 GN=PF3D7_1241200 PE=4 SV=1	144.67	0	4	tr|Q8I517|Q8I517_PLAF7	836963	786667	840049	1.03405e+06	856177	906490	836963	906490	0.0364931	0.0983549	0.115127	0	0	0.172976
tr|B9ZSJ1|B9ZSJ1_PLAF7	B9ZSJ1	PF3D7_0113200	Uncharacterized protein OS=Plasmodium falciparum (isolate 3D7) OX=36329 GN=PF3D7_0113200 PE=4 SV=1	114.32	0	3	tr|B9ZSJ1|B9ZSJ1_PLAF7	453347	800354	559472	964762	681400	694625	559472	694625	0.294198	0.204954	0.312169	0	0	0.173026
tr|Q8ILC9|Q8ILC9_PLAF7	Q8ILC9	PF3D7_1433400	Uncharacterized protein OS=Plasmodium falciparum (isolate 3D7) OX=36329 GN=PF3D7_1433400 PE=4 SV=2	36.28	0.0055788	2	tr|Q8ILC9|Q8ILC9_PLAF7	40240	22598.6	24696.1	31763.3	47283.6	35339.4	24696.1	35339.4	0.33028	0.213157	0.516992	0	0	0.173768
tr|Q8IIG6|Q8IIG6_PLAF7	Q8IIG6	PF3D7_1120100	Phosphoglycerate mutase OS=Plasmodium falciparum (isolate 3D7) OX=36329 GN=PF3D7_1120100 PE=1 SV=1	2379.14	0	35	tr|Q8IIG6|Q8IIG6_PLAF7	9.79591e+08	7.60508e+08	8.80099e+08	7.45004e+08	7.1503e+08	8.04973e+08	8.80099e+08	7.45004e+08	0.125596	0.0606586	-0.240417	0.00456621	0	0.173843
tr|Q8IHU1|Q8IHU1_PLAF7	Q8IHU1	PF3D7_1142400	Coproporphyrinogen-III oxidase OS=Plasmodium falciparum (isolate 3D7) OX=36329 GN=PF3D7_1142400 PE=4 SV=1	98.61	0	3	tr|Q8IHU1|Q8IHU1_PLAF7	568799	426904	519982	436201	477593	345009	519982	436201	0.142685	0.16166	-0.25347	0	0	0.175774
tr|A0A144A1R5|A0A144A1R5_PLAF7	A0A144A1R5	PF3D7_1246200	Actin I OS=Plasmodium falciparum (isolate 3D7) OX=36329 GN=PF3D7_1246200 PE=3 SV=1	2383.2	0	35	tr|A0A144A1R5|A0A144A1R5_PLAF7	5.91935e+08	4.78403e+08	5.09748e+08	4.88602e+08	4.42432e+08	4.50483e+08	5.09748e+08	4.50483e+08	0.111321	0.0535558	-0.178309	0.021164	0.021164	0.176016
tr|Q8IDZ2|Q8IDZ2_PLAF7	Q8IDZ2	PF3D7_1333600	U3 small nucleolar RNA-associated protein 4,putative OS=Plasmodium falciparum (isolate 3D7) OX=36329 GN=PF3D7_1333600 PE=4 SV=1	31.75	0.00939597	1	tr|Q8IDZ2|Q8IDZ2_PLAF7	282496	202769	252452	268463	304406	287321	252452	287321	0.16374	0.0627031	0.186655	0	0	0.177419
sp|O77323|TCPH_PLAF7	O77323	MAL3P3.6	T-complex protein 1 subunit eta OS=Plasmodium falciparum (isolate 3D7) OX=36329 GN=MAL3P3.6 PE=3 SV=1	1989.48	0	29	sp|O77323|TCPH_PLAF7	1.02872e+08	9.84422e+07	1.02121e+08	9.23863e+07	9.32192e+07	8.8753e+07	1.02121e+08	9.23863e+07	0.0234378	0.0259684	-0.144529	0.0222222	0.0222222	0.177803
tr|Q8I274|Q8I274_PLAF7	Q8I274	PF3D7_0106800	Ras-related protein Rab-5C OS=Plasmodium falciparum (isolate 3D7) OX=36329 GN=PF3D7_0106800 PE=4 SV=2	126.56	0	3	tr|Q8I274|Q8I274_PLAF7	421548	2.93866e+06	2.4856e+06	3.98507e+06	2.78042e+06	2.93924e+06	2.4856e+06	2.93924e+06	0.68856	0.202321	0.241852	0	0	0.178208
tr|Q8I3P8|Q8I3P8_PLAF7	Q8I3P8	PF3D7_0521400	Uncharacterized protein OS=Plasmodium falciparum (isolate 3D7) OX=36329 GN=PF3D7_0521400 PE=4 SV=1	81.04	0	3	tr|Q8I3P8|Q8I3P8_PLAF7	512314	926457	968504	909846	986889	1.2391e+06	926457	986889	0.314199	0.164758	0.0911638	0	0	0.178438
tr|Q8I5G8|Q8I5G8_PLAF7	Q8I5G8	PF3D7_1224900	Splicing factor 3B subunit 6, putative OS=Plasmodium falciparum (isolate 3D7) OX=36329 GN=PF3D7_1224900 PE=4 SV=1	131.82	0	3	tr|Q8I5G8|Q8I5G8_PLAF7	1.08964e+06	1.10804e+06	1.02821e+06	1.01129e+06	1.40235e+06	1.52451e+06	1.08964e+06	1.40235e+06	0.0388789	0.204227	0.363988	0	0	0.178457
tr|Q8IDF0|Q8IDF0_PLAF7	Q8IDF0	PF3D7_1355100	DNA helicase OS=Plasmodium falciparum (isolate 3D7) OX=36329 GN=PF3D7_1355100 PE=3 SV=1	1244.93	0	26	tr|Q8IDF0|Q8IDF0_PLAF7	3.85383e+07	3.35325e+07	3.61172e+07	2.85608e+07	3.47414e+07	3.18807e+07	3.61172e+07	3.18807e+07	0.0694178	0.0974906	-0.180003	0.0285714	0	0.178971
tr|C0H4A1|C0H4A1_PLAF7	C0H4A1	PF3D7_0409500	KR domain-containing protein OS=Plasmodium falciparum (isolate 3D7) OX=36329 GN=PF3D7_0409500 PE=4 SV=1	232.21	0	4	tr|C0H4A1|C0H4A1_PLAF7	2.36443e+06	847118	1.29005e+06	1.91225e+06	1.84997e+06	2.36519e+06	1.29005e+06	1.91225e+06	0.519981	0.137682	0.567847	0.166667	0	0.179082
tr|Q8IDB6|Q8IDB6_PLAF7	Q8IDB6	PF3D7_1359300	Exosome complex exonuclease RRP44 OS=Plasmodium falciparum (isolate 3D7) OX=36329 GN=PF3D7_1359300 PE=3 SV=2	74.66	0.00086881	1	tr|Q8IDB6|Q8IDB6_PLAF7	414025	78983	80342.3	28912.4	106411	70407.5	80342.3	70407.5	1.01009	0.565521	-0.190431	0.333333	0	0.179383
tr|Q8IJ34|Q8IJ34_PLAF7	Q8IJ34	PF3D7_1037300	ADP/ATP transporter on adenylate translocase OS=Plasmodium falciparum (isolate 3D7) OX=36329 GN=PF3D7_1037300 PE=3 SV=1	1055.38	0	22	tr|Q8IJ34|Q8IJ34_PLAF7	1.13993e+08	1.07624e+08	1.06067e+08	1.26143e+08	1.19854e+08	1.17607e+08	1.07624e+08	1.19854e+08	0.0384461	0.0365055	0.155278	0	0	0.179599
tr|Q8I5Q7|Q8I5Q7_PLAF7	Q8I5Q7	PF3D7_1214900	Uncharacterized protein OS=Plasmodium falciparum (isolate 3D7) OX=36329 GN=PF3D7_1214900 PE=4 SV=1	150.31	0	1	tr|Q8I5Q7|Q8I5Q7_PLAF7	1.24337e+06	126136	250671	108379	229230	110106	250671	110106	1.13369	0.464224	-1.1869	0	0	0.181832
tr|Q8IAW7|Q8IAW7_PLAF7	Q8IAW7	PF3D7_0813200	CS domain protein, putative OS=Plasmodium falciparum (isolate 3D7) OX=36329 GN=PF3D7_0813200 PE=4 SV=1	51.83	0.00077821	3	tr|Q8IAW7|Q8IAW7_PLAF7	537177	873404	756881	458714	676042	551810	756881	551810	0.236311	0.193947	-0.455894	0	0	0.181987
tr|Q8I261|Q8I261_PLAF7	Q8I261	PF3D7_0108000	Proteasome subunit beta OS=Plasmodium falciparum (isolate 3D7) OX=36329 GN=PF3D7_0108000 PE=1 SV=2	258.43	0	5	tr|Q8I261|Q8I261_PLAF7	1.88935e+07	1.44412e+07	1.60586e+07	1.16308e+07	1.40206e+07	1.58889e+07	1.60586e+07	1.40206e+07	0.136884	0.154144	-0.195793	0	0	0.182519
tr|Q8IAU7|Q8IAU7_PLAF7	Q8IAU7	PF3D7_0811200	ER membrane protein complex subunit 1, putative OS=Plasmodium falciparum (isolate 3D7) OX=36329 GN=PF3D7_0811200 PE=4 SV=1	455.23	0	19	tr|Q8IAU7|Q8IAU7_PLAF7	1.18524e+07	8.34033e+06	9.23748e+06	1.1144e+07	1.09024e+07	1.23802e+07	9.23748e+06	1.1144e+07	0.186005	0.0690787	0.270697	0.0666667	0.0333333	0.183651
tr|Q9NDU7|Q9NDU7_PLAF7	Q9NDU7	PF3D7_0302700	CDGSH iron-sulfur domain-containing protein,putative OS=Plasmodium falciparum (isolate 3D7) OX=36329 GN=PF3D7_0302700 PE=4 SV=1	32.98	0.00814111	1	tr|Q9NDU7|Q9NDU7_PLAF7	108520	217727	207599	312882	206626	207135	207599	207135	0.339084	0.252671	-0.00322705	0	0	0.183996
tr|Q8I446|Q8I446_PLAF7	Q8I446	PF3D7_0505600	BCNT-C domain-containing protein OS=Plasmodium falciparum (isolate 3D7) OX=36329 GN=PF3D7_0505600 PE=4 SV=1	49.03	0.000762195	2	tr|Q8I446|Q8I446_PLAF7	43920.6	100507	61909.8	73550.2	92414.8	111636	61909.8	92414.8	0.42036	0.205798	0.577955	0	0	0.184476
tr|C0H4Y9|C0H4Y9_PLAF7	C0H4Y9	LSM8	U6 snRNA-associated Sm-like protein LSm8 OS=Plasmodium falciparum (isolate 3D7) OX=36329 GN=LSM8 PE=3 SV=1	136.54	0	2	tr|C0H4Y9|C0H4Y9_PLAF7	210382	229477	161381	93661.5	175249	186475	210382	175249	0.175265	0.333721	-0.263601	0.111111	0	0.184875
tr|Q8I4Y9|Q8I4Y9_PLAF7	Q8I4Y9	PF3D7_1244100	N-alpha-acetyltransferase 15, NatA auxiliary subunit, putative OS=Plasmodium falciparum (isolate 3D7) OX=36329 GN=PF3D7_1244100 PE=4 SV=1	483.91	0	15	tr|Q8I4Y9|Q8I4Y9_PLAF7	1.07739e+07	7.80147e+06	9.19066e+06	7.87788e+06	7.68428e+06	8.14558e+06	9.19066e+06	7.87788e+06	0.160693	0.0293122	-0.222361	0	0	0.184886
tr|Q8IKU1|Q8IKU1_PLAF7	Q8IKU1	PF3D7_1453700	Co-chaperone p23 OS=Plasmodium falciparum (isolate 3D7) OX=36329 GN=PF3D7_1453700 PE=4 SV=2	676.47	0	10	tr|Q8IKU1|Q8IKU1_PLAF7	2.03415e+08	1.868e+08	1.39903e+08	1.22435e+08	1.50979e+08	1.60381e+08	1.868e+08	1.50979e+08	0.186397	0.136663	-0.307154	0.0151515	0.0151515	0.185156
tr|Q8IKR4|Q8IKR4_PLAF7	Q8IKR4	PF3D7_1456500	SCD domain-containing protein OS=Plasmodium falciparum (isolate 3D7) OX=36329 GN=PF3D7_1456500 PE=4 SV=1	142.4	0	3	tr|Q8IKR4|Q8IKR4_PLAF7	1.31344e+06	1.30288e+06	1.25576e+06	1.52506e+06	1.38142e+06	1.39388e+06	1.30288e+06	1.39388e+06	0.0237942	0.0555122	0.097404	0	0	0.186398
sp|Q8I467|CADF1_PLAF7	Q8I467	PFE0165w	Cofilin/actin-depolymerizing factor homolog 1 OS=Plasmodium falciparum (isolate 3D7) OX=36329 GN=PFE0165w PE=1 SV=1	382.48	0	4	sp|Q8I467|CADF1_PLAF7	5.21789e+07	7.05049e+07	7.15732e+07	5.38109e+07	6.09533e+07	4.65686e+07	7.05049e+07	5.38109e+07	0.168365	0.133744	-0.389826	0	0	0.189179
tr|Q8I5C4|Q8I5C4_PLAF7	Q8I5C4	PF3D7_1229500	T-complex protein 1 subunit gamma OS=Plasmodium falciparum (isolate 3D7) OX=36329 GN=PF3D7_1229500 PE=3 SV=1	2093.51	0	42	tr|Q8I5C4|Q8I5C4_PLAF7	1.66241e+08	1.26792e+08	1.37066e+08	1.27844e+08	1.19307e+08	1.25623e+08	1.37066e+08	1.25623e+08	0.142749	0.0356473	-0.125764	0.0308642	0.0308642	0.191106
tr|Q8IDK7|Q8IDK7_PLAF7	Q8IDK7	PF3D7_1349200	Glutamate--tRNA ligase, putative OS=Plasmodium falciparum (isolate 3D7) OX=36329 GN=PF3D7_1349200 PE=3 SV=1	1374.45	0	33	tr|Q8IDK7|Q8IDK7_PLAF7	7.05381e+07	5.61178e+07	6.43502e+07	5.20049e+07	5.2904e+07	6.12303e+07	6.43502e+07	5.2904e+07	0.113624	0.0918499	-0.282568	0.0166667	0.0166667	0.191175
tr|Q8IJZ9|Q8IJZ9_PLAF7	Q8IJZ9	PF3D7_1003800	U5 small nuclear ribonuclear protein, putative OS=Plasmodium falciparum (isolate 3D7) OX=36329 GN=PF3D7_1003800 PE=4 SV=1	673.72	0	21	tr|Q8IJZ9|Q8IJZ9_PLAF7	1.23215e+07	1.59902e+07	1.51802e+07	1.66719e+07	1.64387e+07	1.63067e+07	1.51802e+07	1.64387e+07	0.132943	0.011227	0.114909	0.0454545	0	0.191742
tr|Q8IKK4|Q8IKK4_PLAF7	Q8IKK4	PF3D7_1463200	Replication factor C subunit 3, putative OS=Plasmodium falciparum (isolate 3D7) OX=36329 GN=PF3D7_1463200 PE=4 SV=1	558.96	0	15	tr|Q8IKK4|Q8IKK4_PLAF7	1.57771e+07	2.05107e+07	2.10397e+07	2.2749e+07	2.14583e+07	2.16218e+07	2.05107e+07	2.16218e+07	0.15164	0.0320248	0.0761101	0	0	0.191759
tr|Q8IDZ8|Q8IDZ8_PLAF7	Q8IDZ8	PF3D7_1333000	20 kDa chaperonin OS=Plasmodium falciparum (isolate 3D7) OX=36329 GN=PF3D7_1333000 PE=3 SV=1	348.53	0	6	tr|Q8IDZ8|Q8IDZ8_PLAF7	3.12198e+07	2.90952e+07	2.78468e+07	3.39593e+07	3.54107e+07	2.9983e+07	2.90952e+07	3.39593e+07	0.0580301	0.08485	0.223025	0.0666667	0.1	0.191911
tr|Q8I501|Q8I501_PLAF7	Q8I501	PF3D7_1242800	Rab GDP dissociation inhibitor OS=Plasmodium falciparum (isolate 3D7) OX=36329 GN=PF3D7_1242800 PE=1 SV=1	859.34	0	18	tr|Q8I501|Q8I501_PLAF7	4.22868e+07	3.02239e+07	2.93216e+07	3.00002e+07	2.50623e+07	2.8989e+07	3.02239e+07	2.8989e+07	0.213264	0.0931018	-0.060184	0.0133333	0.0266667	0.192366
tr|C0H5I8|C0H5I8_PLAF7	C0H5I8	PF3D7_1358200	Uncharacterized protein OS=Plasmodium falciparum (isolate 3D7) OX=36329 GN=PF3D7_1358200 PE=4 SV=1	34.74	0.0068918	1	tr|C0H5I8|C0H5I8_PLAF7	218316	144299	81878.4	114787	105961	56448.8	144299	105961	0.460981	0.340318	-0.445528	0	0	0.192437
tr|Q8IJM0|Q8IJM0_PLAF7	Q8IJM0	PF3D7_1017900	26S proteasome regulatory subunit p55, putative OS=Plasmodium falciparum (isolate 3D7) OX=36329 GN=PF3D7_1017900 PE=4 SV=1	778.57	0	15	tr|Q8IJM0|Q8IJM0_PLAF7	1.91268e+07	1.36827e+07	1.51298e+07	1.2954e+07	1.25988e+07	1.48942e+07	1.51298e+07	1.2954e+07	0.176464	0.0916405	-0.224001	0	0	0.193259
tr|C0H4K8|C0H4K8_PLAF7	C0H4K8	PF3D7_0705700	40S ribosomal protein S29, putative OS=Plasmodium falciparum (isolate 3D7) OX=36329 GN=PF3D7_0705700 PE=1 SV=1	148.29	0	5	tr|C0H4K8|C0H4K8_PLAF7	1.7706e+07	1.45231e+07	1.4634e+07	1.40359e+07	1.38831e+07	1.33772e+07	1.4634e+07	1.38831e+07	0.115645	0.025043	-0.076	0	0	0.193576
tr|Q8ILG8|Q8ILG8_PLAF7	Q8ILG8	PF3D7_1429600	Uncharacterized protein OS=Plasmodium falciparum (isolate 3D7) OX=36329 GN=PF3D7_1429600 PE=4 SV=1	83.85	0	2	tr|Q8ILG8|Q8ILG8_PLAF7	932856	1.471e+06	1.00399e+06	1.443e+06	1.1811e+06	1.53369e+06	1.00399e+06	1.443e+06	0.257348	0.132109	0.523326	0	0	0.193695
tr|Q8IL17|Q8IL17_PLAF7	Q8IL17	PF3D7_1445600	RNA-binding protein, putative OS=Plasmodium falciparum (isolate 3D7) OX=36329 GN=PF3D7_1445600 PE=4 SV=1	148.52	0	2	tr|Q8IL17|Q8IL17_PLAF7	426694	719191	576842	661878	818483	636990	576842	661878	0.254711	0.139406	0.198389	0	0	0.193803
tr|Q8I5K4|Q8I5K4_PLAF7	Q8I5K4	PF3D7_1220900	Heterochromatin protein 1 OS=Plasmodium falciparum (isolate 3D7) OX=36329 GN=PF3D7_1220900 PE=1 SV=1	652.6	0	10	tr|Q8I5K4|Q8I5K4_PLAF7	3.12028e+07	2.03145e+07	1.89529e+07	1.91452e+07	1.94327e+07	1.7056e+07	2.03145e+07	1.91452e+07	0.285823	0.0699508	-0.0855287	0.0833333	0.0833333	0.194104
tr|Q8I320|Q8I320_PLAF7	Q8I320	PF3D7_0913200	Elongation factor 1-beta OS=Plasmodium falciparum (isolate 3D7) OX=36329 GN=PF3D7_0913200 PE=4 SV=1	694.25	0	16	tr|Q8I320|Q8I320_PLAF7	5.88643e+07	6.70813e+07	7.3848e+07	5.69397e+07	5.66403e+07	6.19547e+07	6.70813e+07	5.69397e+07	0.112669	0.0510259	-0.236477	0.0151515	0	0.195443
tr|C0H530|C0H530_PLAF7	C0H530	PF3D7_0910100	Ran-binding protein, putative OS=Plasmodium falciparum (isolate 3D7) OX=36329 GN=PF3D7_0910100 PE=4 SV=1	754.11	0	18	tr|C0H530|C0H530_PLAF7	1.30488e+07	1.11473e+07	1.14782e+07	9.85249e+06	1.04588e+07	1.13321e+07	1.14782e+07	1.04588e+07	0.0854293	0.070519	-0.134182	0.106061	0.121212	0.195838
tr|Q8ID74|Q8ID74_PLAF7	Q8ID74	PF3D7_1363200	Bifunctional polynucleotide phosphatase/kinase OS=Plasmodium falciparum (isolate 3D7) OX=36329 GN=PF3D7_1363200 PE=4 SV=1	36.09	0.00556715	2	tr|Q8ID74|Q8ID74_PLAF7	125738	95106	68807.9	79856.3	64008.5	78260.9	95106	78260.9	0.295105	0.117848	-0.281246	0	0	0.195989
tr|O97241|O97241_PLAF7	O97241	PF3D7_0305700	Ubiquitin-conjugating enzyme E2, putative OS=Plasmodium falciparum (isolate 3D7) OX=36329 GN=PF3D7_0305700 PE=1 SV=1	213.48	0	5	tr|O97241|O97241_PLAF7	1.50821e+07	1.40258e+07	1.55558e+07	1.3751e+07	1.33281e+07	1.32745e+07	1.50821e+07	1.33281e+07	0.0526132	0.0194048	-0.178367	0	0	0.196005
sp|Q6LFH8|OAT_PLAF7	Q6LFH8	OAT	Ornithine aminotransferase OS=Plasmodium falciparum (isolate 3D7) OX=36329 GN=OAT PE=1 SV=1	3528.86	0	44	sp|Q6LFH8|OAT_PLAF7	1.49528e+09	1.11908e+09	1.12655e+09	1.14035e+09	9.83985e+08	1.05777e+09	1.12655e+09	1.05777e+09	0.172477	0.0737465	-0.0908887	0.0430108	0.0716846	0.196663
tr|A0A144A4E0|A0A144A4E0_PLAF7	A0A144A4E0	PF3D7_1457200	Thioredoxin OS=Plasmodium falciparum (isolate 3D7) OX=36329 GN=PF3D7_1457200 PE=3 SV=1	390.78	0	9	tr|A0A144A4E0|A0A144A4E0_PLAF7	1.50959e+08	1.43264e+08	1.54119e+08	1.11925e+08	1.28516e+08	1.51692e+08	1.50959e+08	1.28516e+08	0.0373584	0.152812	-0.232206	0.121212	0.0909091	0.197025
tr|Q8IB03|Q8IB03_PLAF7	Q8IB03	PF3D7_0816600	Chaperone protein ClpB1 OS=Plasmodium falciparum (isolate 3D7) OX=36329 GN=PF3D7_0816600 PE=1 SV=1	1914.71	0	39	tr|Q8IB03|Q8IB03_PLAF7	3.59911e+07	3.14607e+07	3.15831e+07	3.91872e+07	3.58777e+07	3.56241e+07	3.15831e+07	3.58777e+07	0.0781837	0.05388	0.183932	0.00694444	0	0.197082
tr|C0H5I2|C0H5I2_PLAF7	C0H5I2	PF3D7_1352400	Uncharacterized protein OS=Plasmodium falciparum (isolate 3D7) OX=36329 GN=PF3D7_1352400 PE=4 SV=1	257.1	0	9	tr|C0H5I2|C0H5I2_PLAF7	1.36804e+06	1.37334e+06	1.2867e+06	1.68058e+06	1.3623e+06	1.51151e+06	1.36804e+06	1.51151e+06	0.0361691	0.104893	0.143883	0	0	0.197129
tr|Q8I2N0|Q8I2N0_PLAF7	Q8I2N0	PF3D7_0927900	Phosphatidylserine decarboxylase proenzyme OS=Plasmodium falciparum (isolate 3D7) OX=36329 GN=PF3D7_0927900 PE=3 SV=1	266.33	0	6	tr|Q8I2N0|Q8I2N0_PLAF7	3.60767e+06	3.34803e+06	3.01817e+06	4.22498e+06	3.5796e+06	3.54996e+06	3.34803e+06	3.5796e+06	0.0888658	0.100785	0.0964851	0	0	0.198242
tr|Q8IE02|Q8IE02_PLAF7	Q8IE02	PF3D7_1332600	Apurinic/apyrimidinic endonuclease Apn1,putative OS=Plasmodium falciparum (isolate 3D7) OX=36329 GN=PF3D7_1332600 PE=3 SV=1	90.18	0	4	tr|Q8IE02|Q8IE02_PLAF7	712387	952326	691875	421147	762453	670511	712387	670511	0.184352	0.285743	-0.0874007	0	0	0.198396
tr|Q8I388|Q8I388_PLAF7	Q8I388	PF3D7_0906100	Vacuolar protein sorting-associated protein 46,putative OS=Plasmodium falciparum (isolate 3D7) OX=36329 GN=PF3D7_0906100 PE=4 SV=1	185.89	0	3	tr|Q8I388|Q8I388_PLAF7	1.33083e+06	1.69387e+06	1.36155e+06	1.10944e+06	1.28073e+06	1.38231e+06	1.36155e+06	1.28073e+06	0.137693	0.109668	-0.0882877	0.166667	0.166667	0.200443
tr|O97247|O97247_PLAF7	O97247	PF3D7_0306800	T-complex protein 1 subunit beta OS=Plasmodium falciparum (isolate 3D7) OX=36329 GN=PF3D7_0306800 PE=3 SV=4	2839.16	0	41	tr|O97247|O97247_PLAF7	2.12124e+08	1.78307e+08	1.88506e+08	1.82782e+08	1.61728e+08	1.69785e+08	1.88506e+08	1.69785e+08	0.0898877	0.0619703	-0.150907	0.03125	0.046875	0.201111
tr|Q8IIQ1|Q8IIQ1_PLAF7	Q8IIQ1	PF3D7_1111100	Replication factor C subunit 5, putative OS=Plasmodium falciparum (isolate 3D7) OX=36329 GN=PF3D7_1111100 PE=4 SV=1	137.66	0	6	tr|Q8IIQ1|Q8IIQ1_PLAF7	2.36363e+06	2.31817e+06	1.75664e+06	2.42746e+06	2.54733e+06	2.41047e+06	2.31817e+06	2.42746e+06	0.157532	0.0303019	0.0664603	0.0555556	0	0.201429
tr|O97244|O97244_PLAF7	O97244	PF3D7_0306200	Activator of Hsp90 ATPase OS=Plasmodium falciparum (isolate 3D7) OX=36329 GN=PF3D7_0306200 PE=4 SV=3	410.78	0	10	tr|O97244|O97244_PLAF7	8.32573e+06	8.4245e+06	8.41558e+06	6.63111e+06	7.13831e+06	8.53312e+06	8.41558e+06	7.13831e+06	0.00651279	0.132485	-0.237479	0	0	0.20171
tr|C0H5H1|C0H5H1_PLAF7	C0H5H1	PF3D7_1344300	Uncharacterized protein OS=Plasmodium falciparum (isolate 3D7) OX=36329 GN=PF3D7_1344300 PE=4 SV=2	52.76	0.000783085	1	tr|C0H5H1|C0H5H1_PLAF7	247526	191871	150477	331994	208543	221487	191871	221487	0.247675	0.267108	0.207086	0	0	0.202656
tr|Q8II72|Q8II72_PLAF7	Q8II72	PF3D7_1129100	Parasitophorous vacuolar protein 1 OS=Plasmodium falciparum (isolate 3D7) OX=36329 GN=PF3D7_1129100 PE=4 SV=1	828.12	0	19	tr|Q8II72|Q8II72_PLAF7	1.52164e+08	1.05028e+08	1.12305e+08	1.03789e+08	1.06612e+08	9.96606e+07	1.12305e+08	1.03789e+08	0.206027	0.0338273	-0.113777	0.0133333	0.0133333	0.202702
tr|C6KT35|C6KT35_PLAF7	C6KT35	PF3D7_0619500	Acyl-CoA synthetase OS=Plasmodium falciparum (isolate 3D7) OX=36329 GN=PF3D7_0619500 PE=4 SV=1	224.79	0	6	tr|C6KT35|C6KT35_PLAF7	3.56179e+06	3.43182e+06	3.54683e+06	3.07017e+06	3.1759e+06	3.3305e+06	3.54683e+06	3.1759e+06	0.0202407	0.0410145	-0.159363	0.0555556	0	0.203057
tr|Q8IAM0|Q8IAM0_PLAF7	Q8IAM0	PF3D7_0802000	Glutamate dehydrogenase, putative OS=Plasmodium falciparum (isolate 3D7) OX=36329 GN=PF3D7_0802000 PE=4 SV=1	1315.54	0	28	tr|Q8IAM0|Q8IAM0_PLAF7	6.34777e+07	4.72676e+07	5.09665e+07	4.51069e+07	4.20405e+07	5.11252e+07	5.09665e+07	4.51069e+07	0.157593	0.10027	-0.176203	0	0	0.204353
tr|Q8IHR6|Q8IHR6_PLAF7	Q8IHR6	PF3D7_1145100	Coatomer subunit gamma OS=Plasmodium falciparum (isolate 3D7) OX=36329 GN=PF3D7_1145100 PE=3 SV=1	185.3	0	6	tr|Q8IHR6|Q8IHR6_PLAF7	2.88554e+06	3.75336e+06	3.7232e+06	4.01821e+06	3.6893e+06	4.15197e+06	3.7232e+06	4.01821e+06	0.142604	0.06023	0.110012	0	0	0.204385
tr|C0H5L8|C0H5L8_PLAF7	C0H5L8	PF3D7_1369700	U2 small nuclear ribonucleoprotein A', putative OS=Plasmodium falciparum (isolate 3D7) OX=36329 GN=PF3D7_1369700 PE=4 SV=1	139.73	0	3	tr|C0H5L8|C0H5L8_PLAF7	2.27148e+06	3.13691e+06	3.12164e+06	3.6817e+06	3.56303e+06	2.88288e+06	3.12164e+06	3.56303e+06	0.1742	0.127684	0.190798	0	0	0.20449
tr|A0A143ZZZ3|A0A143ZZZ3_PLAF7	A0A143ZZZ3	PF3D7_1225600	Uncharacterized protein OS=Plasmodium falciparum (isolate 3D7) OX=36329 GN=PF3D7_1225600 PE=4 SV=1	32.76	0.00810811	2	tr|A0A143ZZZ3|A0A143ZZZ3_PLAF7	87032.6	120851	124758	109009	153664	143131	120851	143131	0.187095	0.172567	0.2441	0.166667	0	0.205186
tr|Q8IDP0|Q8IDP0_PLAF7	Q8IDP0	PF3D7_1345600	Inner membrane complex protein OS=Plasmodium falciparum (isolate 3D7) OX=36329 GN=PF3D7_1345600 PE=4 SV=1	47.02	0.00150038	2	tr|Q8IDP0|Q8IDP0_PLAF7	136315	49811.3	40699.8	204742	113551	66834.3	49811.3	113551	0.697941	0.546355	1.1888	0.333333	0.166667	0.205859
tr|Q8IIK2|Q8IIK2_PLAF7	Q8IIK2	PF3D7_1116400	Guanine nucleotide-exchange factor SEC12 OS=Plasmodium falciparum (isolate 3D7) OX=36329 GN=PF3D7_1116400 PE=4 SV=1	72.13	0.000858369	3	tr|Q8IIK2|Q8IIK2_PLAF7	2.27751e+06	1.29013e+06	1.31925e+06	2.43778e+06	1.86409e+06	1.83022e+06	1.31925e+06	1.86409e+06	0.344909	0.167031	0.498747	0.222222	0	0.207381
tr|Q7KWJ1|Q7KWJ1_PLAF7	Q7KWJ1	PF3D7_0208500	Acyl carrier protein OS=Plasmodium falciparum (isolate 3D7) OX=36329 GN=PF3D7_0208500 PE=3 SV=1	48.24	0.00150943	2	tr|Q7KWJ1|Q7KWJ1_PLAF7	733569	66167.8	116261	55368.8	83771.1	93742.3	116261	83771.1	1.21739	0.256492	-0.472847	0.166667	0	0.208545
tr|O77381|O77381_PLAF7	O77381	PF3D7_0317600	40S ribosomal protein S11, putative OS=Plasmodium falciparum (isolate 3D7) OX=36329 GN=PF3D7_0317600 PE=1 SV=2	569.89	0	14	tr|O77381|O77381_PLAF7	1.92136e+08	1.74731e+08	1.86588e+08	1.72773e+08	1.64566e+08	1.64662e+08	1.86588e+08	1.64662e+08	0.0481926	0.0281513	-0.180351	0.037037	0.0555556	0.209886
tr|Q8IJI8|Q8IJI8_PLAF7	Q8IJI8	PF3D7_1021500	ATP-dependent RNA helicase ROK1, putative OS=Plasmodium falciparum (isolate 3D7) OX=36329 GN=PF3D7_1021500 PE=4 SV=1	45.86	0.0014892	1	tr|Q8IJI8|Q8IJI8_PLAF7	124280	287912	252451	330448	341284	225313	252451	330448	0.388549	0.214227	0.388418	0	0	0.210684
tr|Q8ID21|Q8ID21_PLAF7	Q8ID21	PF3D7_1368900	Uncharacterized protein OS=Plasmodium falciparum (isolate 3D7) OX=36329 GN=PF3D7_1368900 PE=4 SV=1	206.54	0	7	tr|Q8ID21|Q8ID21_PLAF7	7.25424e+06	6.50347e+06	7.45222e+06	5.37439e+06	6.50719e+06	6.79917e+06	7.25424e+06	6.50719e+06	0.070792	0.120863	-0.15679	0	0	0.210687
sp|Q8IBP3|ITPA_PLAF7	Q8IBP3	MAL7P1.110	Inosine triphosphate pyrophosphatase OS=Plasmodium falciparum (isolate 3D7) OX=36329 GN=MAL7P1.110 PE=3 SV=1	121.43	0	4	sp|Q8IBP3|ITPA_PLAF7	5.51316e+06	5.48845e+06	5.65094e+06	4.85746e+06	4.88605e+06	5.37659e+06	5.51316e+06	4.88605e+06	0.0157742	0.0578999	-0.17421	0	0	0.211059
tr|Q8IJR8|Q8IJR8_PLAF7	Q8IJR8	PF3D7_1012700	NLI interacting factor-like phosphatase,putative OS=Plasmodium falciparum (isolate 3D7) OX=36329 GN=PF3D7_1012700 PE=4 SV=1	38.87	0.00426743	1	tr|Q8IJR8|Q8IJR8_PLAF7	10193.8	127352	147098	142756	147745	176247	127352	147745	0.779954	0.116138	0.214281	0	0	0.2115
tr|Q8IE99|Q8IE99_PLAF7	Q8IE99	PF3D7_1321700	Splicing factor 1 OS=Plasmodium falciparum (isolate 3D7) OX=36329 GN=PF3D7_1321700 PE=4 SV=1	169.36	0	7	tr|Q8IE99|Q8IE99_PLAF7	1.2476e+06	2.34244e+06	2.05128e+06	2.5476e+06	2.93523e+06	1.85783e+06	2.05128e+06	2.5476e+06	0.30156	0.223024	0.312616	0	0	0.212165
tr|Q8IJF4|Q8IJF4_PLAF7	Q8IJF4	PF3D7_1025000	Formin 2, putative OS=Plasmodium falciparum (isolate 3D7) OX=36329 GN=PF3D7_1025000 PE=4 SV=2	163.1	0	3	tr|Q8IJF4|Q8IJF4_PLAF7	129297	417764	554071	760548	481965	424860	417764	481965	0.590887	0.323159	0.206241	0	0	0.212229
tr|Q8I3A8|Q8I3A8_PLAF7	Q8I3A8	PF3D7_0904100	AP-4 complex subunit epsilon, putative OS=Plasmodium falciparum (isolate 3D7) OX=36329 GN=PF3D7_0904100 PE=4 SV=2	117.12	0	2	tr|Q8I3A8|Q8I3A8_PLAF7	960234	1.0525e+06	1.16409e+06	740523	1.01692e+06	976568	1.0525e+06	976568	0.0963994	0.163823	-0.108029	0	0	0.213196
tr|Q8I5P4|Q8I5P4_PLAF7	Q8I5P4	PF3D7_1216300	Signal recognition particle subunit SRP19 OS=Plasmodium falciparum (isolate 3D7) OX=36329 GN=PF3D7_1216300 PE=4 SV=1	240.89	0	5	tr|Q8I5P4|Q8I5P4_PLAF7	5.02597e+06	4.96476e+06	5.1005e+06	3.67469e+06	4.71553e+06	4.89712e+06	5.02597e+06	4.71553e+06	0.0135132	0.14893	-0.0919816	0.285714	0	0.214254
tr|Q8IDG2|Q8IDG2_PLAF7	Q8IDG2	PF3D7_1353900	Proteasome subunit alpha type OS=Plasmodium falciparum (isolate 3D7) OX=36329 GN=PF3D7_1353900 PE=1 SV=1	769.53	0	15	tr|Q8IDG2|Q8IDG2_PLAF7	8.09705e+07	6.13113e+07	6.16007e+07	5.61257e+07	5.7813e+07	6.19919e+07	6.16007e+07	5.7813e+07	0.165796	0.0514976	-0.0915516	0.0151515	0.030303	0.21637
tr|Q7KQK3|Q7KQK3_PLAF7	Q7KQK3	PF3D7_1211400	Heat shock protein DNAJ homologue Pfj4 OS=Plasmodium falciparum (isolate 3D7) OX=36329 GN=PF3D7_1211400 PE=4 SV=1	677.08	0	15	tr|Q7KQK3|Q7KQK3_PLAF7	6.0139e+07	5.1522e+07	5.57355e+07	5.09992e+07	4.85362e+07	5.11769e+07	5.57355e+07	5.09992e+07	0.0772212	0.0293797	-0.128123	0	0	0.216438
tr|Q8I323|Q8I323_PLAF7	Q8I323	PF3D7_0912900	26S proteasome regulatory subunit RPN8,putative OS=Plasmodium falciparum (isolate 3D7) OX=36329 GN=PF3D7_0912900 PE=4 SV=1	329.5	0	8	tr|Q8I323|Q8I323_PLAF7	6.96106e+06	4.824e+06	5.60953e+06	4.16565e+06	4.81823e+06	5.56158e+06	5.60953e+06	4.81823e+06	0.186429	0.144057	-0.219374	0.0666667	0.0666667	0.218532
tr|Q8IBJ1|Q8IBJ1_PLAF7	Q8IBJ1	PF3D7_0726500	Ubiquitin carboxyl-terminal hydrolase, putative OS=Plasmodium falciparum (isolate 3D7) OX=36329 GN=PF3D7_0726500 PE=3 SV=1	402.5	0	11	tr|Q8IBJ1|Q8IBJ1_PLAF7	1.63318e+06	3.38144e+06	3.48721e+06	3.36551e+06	3.545e+06	3.89569e+06	3.38144e+06	3.545e+06	0.367415	0.0748617	0.068149	0.111111	0.0277778	0.21858
tr|C0H5G7|C0H5G7_PLAF7	C0H5G7	PF3D7_1343900	U4/U6 small nuclear ribonucleoprotein PRP4,putative OS=Plasmodium falciparum (isolate 3D7) OX=36329 GN=PF3D7_1343900 PE=4 SV=1	99.89	0	2	tr|C0H5G7|C0H5G7_PLAF7	713146	1.01231e+06	996484	983718	1.08734e+06	1.08239e+06	996484	1.08239e+06	0.185537	0.0556045	0.119303	0.166667	0	0.21921
tr|Q8I3N7|Q8I3N7_PLAF7	Q8I3N7	PF3D7_0522600	Inner membrane complex protein OS=Plasmodium falciparum (isolate 3D7) OX=36329 GN=PF3D7_0522600 PE=4 SV=1	83.39	0	1	tr|Q8I3N7|Q8I3N7_PLAF7	4788.68	34013.7	33038.7	122817	38070.2	19425.1	33038.7	38070.2	0.693145	0.91683	0.204506	0	0	0.219236
tr|Q8IIF0|Q8IIF0_PLAF7	Q8IIF0	PF3D7_1121600	Exported protein 1 OS=Plasmodium falciparum (isolate 3D7) OX=36329 GN=PF3D7_1121600 PE=4 SV=1	583.31	0	8	tr|Q8IIF0|Q8IIF0_PLAF7	5.385e+07	4.3956e+07	3.94343e+07	5.46018e+07	5.50857e+07	4.77121e+07	4.3956e+07	5.46018e+07	0.161165	0.0786133	0.31289	0	0	0.22049
tr|A0A144A0M5|A0A144A0M5_PLAF7	A0A144A0M5	PF3D7_1248200	Pre-mRNA-splicing factor RBM22, putative OS=Plasmodium falciparum (isolate 3D7) OX=36329 GN=PF3D7_1248200 PE=4 SV=1	82.3	0	4	tr|A0A144A0M5|A0A144A0M5_PLAF7	1.37901e+06	1.79728e+06	1.35616e+06	1.36035e+06	2.1909e+06	2.181e+06	1.37901e+06	2.181e+06	0.164378	0.249475	0.661358	0	0	0.221639
tr|Q6ZLZ9|Q6ZLZ9_PLAF7	Q6ZLZ9	PF3D7_0903700	Tubulin alpha chain OS=Plasmodium falciparum (isolate 3D7) OX=36329 GN=PF3D7_0903700 PE=3 SV=1	1555.95	0	21	tr|Q6ZLZ9|Q6ZLZ9_PLAF7	2.36652e+08	2.39309e+08	2.32909e+08	2.14031e+08	2.1743e+08	2.17784e+08	2.36652e+08	2.1743e+08	0.0136084	0.00957477	-0.122217	0.0490196	0.0392157	0.221719
sp|O97237|YGCC1_PLAF7	O97237	PFC0235w	GRIP and coiled-coil domain-containing protein PFC0235w OS=Plasmodium falciparum (isolate 3D7) OX=36329 GN=PFC0235w PE=1 SV=2	104.57	0	3	sp|O97237|YGCC1_PLAF7	3.5388e+06	476946	424012	297981	418720	538300	476946	418720	1.20496	0.287234	-0.187839	0.0833333	0	0.221943
tr|Q8IE57|Q8IE57_PLAF7	Q8IE57	PF3D7_1326300	RNA-binding protein, putative OS=Plasmodium falciparum (isolate 3D7) OX=36329 GN=PF3D7_1326300 PE=4 SV=1	50.19	0.000771605	2	tr|Q8IE57|Q8IE57_PLAF7	2.34482e+06	3.30773e+06	2.39369e+06	3.58955e+06	3.27056e+06	2.69291e+06	2.39369e+06	3.27056e+06	0.202225	0.142727	0.450302	0	0	0.221999
tr|C0H489|C0H489_PLAF7	C0H489	PF3D7_0405100	Protein transport protein Sec24B OS=Plasmodium falciparum (isolate 3D7) OX=36329 GN=PF3D7_0405100 PE=4 SV=1	83.75	0	2	tr|C0H489|C0H489_PLAF7	447731	309925	294957	203255	341197	288270	309925	288270	0.240021	0.250709	-0.104498	0.166667	0	0.222311
tr|Q8IDU2|Q8IDU2_PLAF7	Q8IDU2	PF3D7_1339300	Uncharacterized protein OS=Plasmodium falciparum (isolate 3D7) OX=36329 GN=PF3D7_1339300 PE=4 SV=1	34.67	0.00688231	1	tr|Q8IDU2|Q8IDU2_PLAF7	1.27338e+06	951969	895474	872989	1.01689e+06	673370	951969	872989	0.195952	0.201906	-0.124951	0	0	0.222535
tr|A0A143ZVN3|A0A143ZVN3_PLAF7	A0A143ZVN3	PF3D7_0833000	Rifin OS=Plasmodium falciparum (isolate 3D7) OX=36329 GN=PF3D7_0833000 PE=4 SV=1	33.68	0.00681663	1	tr|A0A143ZVN3|A0A143ZVN3_PLAF7	20592.6	183325	213592	223017	194066	231181	183325	223017	0.745852	0.0902562	0.28275	0	0	0.222844
tr|A0A144A4G4|A0A144A4G4_PLAF7	A0A144A4G4	PF3D7_1439900	Triosephosphate isomerase OS=Plasmodium falciparum (isolate 3D7) OX=36329 GN=PF3D7_1439900 PE=3 SV=1	1353.75	0	21	tr|A0A144A4G4|A0A144A4G4_PLAF7	3.75011e+08	2.9657e+08	3.05065e+08	2.95894e+08	2.68572e+08	2.94281e+08	3.05065e+08	2.94281e+08	0.132226	0.0535555	-0.0519233	0.036036	0.045045	0.223147
tr|Q8I618|Q8I618_PLAF7	Q8I618	PF3D7_1202700	Uncharacterized protein OS=Plasmodium falciparum (isolate 3D7) OX=36329 GN=PF3D7_1202700 PE=4 SV=2	69.15	0.000841751	2	tr|Q8I618|Q8I618_PLAF7	87366.1	589860	594417	866447	629032	500615	589860	629032	0.68755	0.278949	0.0927612	0	0	0.223383
tr|C6KSP9|C6KSP9_PLAF7	C6KSP9	PF3D7_0605100	RNA-binding protein, putative OS=Plasmodium falciparum (isolate 3D7) OX=36329 GN=PF3D7_0605100 PE=4 SV=1	700.3	0	18	tr|C6KSP9|C6KSP9_PLAF7	1.64742e+07	1.5177e+07	1.45776e+07	1.7195e+07	1.68811e+07	1.67357e+07	1.5177e+07	1.68811e+07	0.0629135	0.0138603	0.153521	0	0	0.223719
tr|Q8I202|Q8I202_PLAF7	Q8I202	PF3D7_0402400	Uncharacterized protein OS=Plasmodium falciparum (isolate 3D7) OX=36329 GN=PF3D7_0402400 PE=4 SV=1	358.47	0	8	tr|Q8I202|Q8I202_PLAF7	1.00956e+07	9.8386e+06	8.86874e+06	1.09918e+07	9.97895e+06	1.09384e+07	9.8386e+06	1.09384e+07	0.0673934	0.0535889	0.152876	0	0	0.223998
tr|Q8I2B1|Q8I2B1_PLAF7	Q8I2B1	PF3D7_0102900	Aspartate--tRNA ligase OS=Plasmodium falciparum (isolate 3D7) OX=36329 GN=PF3D7_0102900 PE=3 SV=1	572.66	0	15	tr|Q8I2B1|Q8I2B1_PLAF7	4.06451e+07	2.96932e+07	3.13917e+07	2.7301e+07	2.75063e+07	3.22224e+07	3.13917e+07	2.75063e+07	0.173821	0.0959678	-0.190618	0	0	0.224151
tr|Q8ILG3|Q8ILG3_PLAF7	Q8ILG3	PF3D7_1430100	Serine/threonine-protein phosphatase 2A activator OS=Plasmodium falciparum (isolate 3D7) OX=36329 GN=PF3D7_1430100 PE=3 SV=1	89.52	0	3	tr|Q8ILG3|Q8ILG3_PLAF7	66344.5	256043	265069	226248	288252	330536	256043	288252	0.573075	0.186218	0.170947	0	0	0.224886
tr|A0A144A022|A0A144A022_PLAF7	A0A144A022	PF3D7_1107700	Pescadillo homolog OS=Plasmodium falciparum (isolate 3D7) OX=36329 GN=PF3D7_1107700 PE=3 SV=1	52.6	0.000782473	2	tr|A0A144A022|A0A144A022_PLAF7	868895	717949	680261	905040	802310	849747	717949	849747	0.132093	0.0603203	0.243151	0	0	0.224942
tr|Q8IBV2|Q8IBV2_PLAF7	Q8IBV2	PF3D7_0714500	Transcription elongation factor s-II, putative OS=Plasmodium falciparum (isolate 3D7) OX=36329 GN=PF3D7_0714500 PE=4 SV=1	410.03	0	12	tr|Q8IBV2|Q8IBV2_PLAF7	9.01988e+06	1.00429e+07	9.97683e+06	7.89201e+06	9.54957e+06	8.56469e+06	9.97683e+06	8.56469e+06	0.0591446	0.096169	-0.220181	0	0	0.225215
tr|Q8I5R8|Q8I5R8_PLAF7	Q8I5R8	PF3D7_1213700	DNA-directed RNA polymerases I, II, and III subunit RPABC3 OS=Plasmodium falciparum (isolate 3D7) OX=36329 GN=PF3D7_1213700 PE=3 SV=1	211.19	0	7	tr|Q8I5R8|Q8I5R8_PLAF7	3.48299e+06	3.65303e+06	3.62355e+06	3.75396e+06	3.71687e+06	4.96016e+06	3.62355e+06	3.75396e+06	0.0253354	0.170706	0.051008	0.0952381	0	0.226771
tr|C0H4L1|C0H4L1_PLAF7	C0H4L1	PF3D7_0706000	Importin-7, putative OS=Plasmodium falciparum (isolate 3D7) OX=36329 GN=PF3D7_0706000 PE=4 SV=1	796.83	0	22	tr|C0H4L1|C0H4L1_PLAF7	3.58764e+07	3.18055e+07	3.41547e+07	2.52319e+07	3.02922e+07	3.41152e+07	3.41547e+07	3.02922e+07	0.060199	0.14913	-0.17314	0.0138889	0	0.22792
tr|A0A143ZZZ9|A0A143ZZZ9_PLAF7	A0A143ZZZ9	PF3D7_1105700	tRNA-splicing ligase RtcB homolog OS=Plasmodium falciparum (isolate 3D7) OX=36329 GN=PF3D7_1105700 PE=3 SV=1	393.44	0	8	tr|A0A143ZZZ9|A0A143ZZZ9_PLAF7	6.34862e+06	6.75598e+06	7.26883e+06	7.91876e+06	6.95509e+06	7.76214e+06	6.75598e+06	7.76214e+06	0.0678997	0.068536	0.20029	0.0666667	0.0666667	0.2287
tr|Q8IAR6|Q8IAR6_PLAF7	Q8IAR6	PF3D7_0807800	26S proteasome regulatory subunit RPN10,putative OS=Plasmodium falciparum (isolate 3D7) OX=36329 GN=PF3D7_0807800 PE=4 SV=1	202.8	0	7	tr|Q8IAR6|Q8IAR6_PLAF7	9.88173e+06	7.79432e+06	7.6151e+06	8.69455e+06	6.53896e+06	6.22696e+06	7.79432e+06	6.53896e+06	0.14947	0.187836	-0.253361	0	0	0.228722
tr|Q8IB24|Q8IB24_PLAF7	Q8IB24	PF3D7_0818900	Heat shock protein 70 OS=Plasmodium falciparum (isolate 3D7) OX=36329 GN=PF3D7_0818900 PE=3 SV=1	9774.35	0	74	tr|Q8IB24|Q8IB24_PLAF7	7.78886e+09	7.29627e+09	7.38189e+09	7.08989e+09	6.7903e+09	6.63321e+09	7.38189e+09	6.7903e+09	0.0351427	0.033931	-0.120516	0.028	0.02	0.228748
tr|O97238|O97238_PLAF7	O97238	PF3D7_0305300	Uncharacterized protein OS=Plasmodium falciparum (isolate 3D7) OX=36329 GN=PF3D7_0305300 PE=4 SV=3	181.09	0	6	tr|O97238|O97238_PLAF7	4.07784e+06	4.55718e+06	3.84217e+06	5.63564e+06	5.00627e+06	3.97486e+06	4.07784e+06	5.00627e+06	0.0876072	0.172088	0.295931	0	0	0.229238
tr|Q8I5E0|Q8I5E0_PLAF7	Q8I5E0	PF3D7_1227800	Histone S-adenosyl methyltransferase, putative OS=Plasmodium falciparum (isolate 3D7) OX=36329 GN=PF3D7_1227800 PE=4 SV=1	194.21	0	6	tr|Q8I5E0|Q8I5E0_PLAF7	2.2839e+06	1.62516e+06	1.91305e+06	2.41945e+06	1.86771e+06	2.70516e+06	1.91305e+06	2.41945e+06	0.170165	0.182646	0.338806	0.0555556	0	0.229789
tr|Q8I3X4|Q8I3X4_PLAF7	Q8I3X4	PF3D7_0513300	Purine nucleoside phosphorylase OS=Plasmodium falciparum (isolate 3D7) OX=36329 GN=PF3D7_0513300 PE=1 SV=1	2062.81	0	27	tr|Q8I3X4|Q8I3X4_PLAF7	5.87949e+08	4.55217e+08	4.61911e+08	4.71041e+08	4.01759e+08	4.37503e+08	4.61911e+08	4.37503e+08	0.149046	0.0793261	-0.0783218	0.0340136	0.0136054	0.229972
tr|Q8IIY3|Q8IIY3_PLAF7	Q8IIY3	PF3D7_1101300	Rifin OS=Plasmodium falciparum (isolate 3D7) OX=36329 GN=PF3D7_1101300 PE=4 SV=1	323.72	0	10	tr|Q8IIY3|Q8IIY3_PLAF7	4.28896e+06	3.87204e+06	3.30098e+06	6.3721e+06	4.69087e+06	3.53774e+06	3.87204e+06	4.69087e+06	0.129818	0.292867	0.276761	0	0	0.230131
tr|Q8I574|Q8I574_PLAF7	Q8I574	PF3D7_1234800	Splicing factor 3B subunit 3, putative OS=Plasmodium falciparum (isolate 3D7) OX=36329 GN=PF3D7_1234800 PE=4 SV=1	865.21	0	21	tr|Q8I574|Q8I574_PLAF7	9.03621e+06	7.43429e+06	8.5631e+06	9.47333e+06	9.30302e+06	9.00567e+06	8.5631e+06	9.30302e+06	0.0986298	0.0255585	0.119567	0.0277778	0	0.230349
tr|Q8I5M2|Q8I5M2_PLAF7	Q8I5M2	PF3D7_1218600	Arginine--tRNA ligase, putative OS=Plasmodium falciparum (isolate 3D7) OX=36329 GN=PF3D7_1218600 PE=1 SV=1	262.17	0	12	tr|Q8I5M2|Q8I5M2_PLAF7	1.77021e+07	1.21333e+07	1.19e+07	1.1914e+07	1.02492e+07	1.23838e+07	1.21333e+07	1.1914e+07	0.2361	0.0974028	-0.0263171	0.025641	0	0.231377
tr|A0A144A4T0|A0A144A4T0_PLAF7	A0A144A4T0	PF3D7_1472200	Histone deacetylase, putative OS=Plasmodium falciparum (isolate 3D7) OX=36329 GN=PF3D7_1472200 PE=4 SV=1	135.41	0	5	tr|A0A144A4T0|A0A144A4T0_PLAF7	348842	459749	389057	782575	474764	372320	389057	474764	0.140643	0.393069	0.28723	0.0666667	0	0.231584
tr|Q8ILP6|Q8ILP6_PLAF7	Q8ILP6	PF3D7_1420400	Glycine--tRNA ligase OS=Plasmodium falciparum (isolate 3D7) OX=36329 GN=PF3D7_1420400 PE=4 SV=2	1420.22	0	35	tr|Q8ILP6|Q8ILP6_PLAF7	4.39944e+07	3.69451e+07	3.9417e+07	3.44164e+07	3.37003e+07	3.93086e+07	3.9417e+07	3.44164e+07	0.0891515	0.0852398	-0.195721	0.0243902	0.0243902	0.233395
sp|C6KSS5|LRR2_PLAF7	C6KSS5	PFF0380w	Protein PFF0380w OS=Plasmodium falciparum (isolate 3D7) OX=36329 GN=PFF0380w PE=1 SV=1	46.98	0.00149813	1	sp|C6KSS5|LRR2_PLAF7	2.76528e+06	1.10149e+06	1.279e+06	961327	1.18109e+06	1.27755e+06	1.279e+06	1.18109e+06	0.532671	0.142166	-0.114892	0.5	0.333333	0.235156
tr|Q8II99|Q8II99_PLAF7	Q8II99	PF3D7_1126500	Uncharacterized protein OS=Plasmodium falciparum (isolate 3D7) OX=36329 GN=PF3D7_1126500 PE=4 SV=1	49.12	0.000763359	2	tr|Q8II99|Q8II99_PLAF7	163746	134591	170390	146364	198738	214588	163746	198738	0.121879	0.191379	0.279403	0	0	0.236188
tr|Q8ILZ2|Q8ILZ2_PLAF7	Q8ILZ2	PF3D7_1410300	WD repeat-containing protein, putative OS=Plasmodium falciparum (isolate 3D7) OX=36329 GN=PF3D7_1410300 PE=4 SV=1	46.49	0.00149365	1	tr|Q8ILZ2|Q8ILZ2_PLAF7	93460.8	139213	121665	79219.6	129661	75635	121665	79219.6	0.195422	0.318546	-0.618986	0	0	0.237175
tr|Q8I2G2|Q8I2G2_PLAF7	Q8I2G2	PF3D7_0935800	Cytoadherence linked asexual protein 9 OS=Plasmodium falciparum (isolate 3D7) OX=36329 GN=PF3D7_0935800 PE=4 SV=1	305.87	0	10	tr|Q8I2G2|Q8I2G2_PLAF7	9.95754e+06	8.11323e+06	7.48874e+06	1.20251e+07	9.30444e+06	8.75971e+06	8.11323e+06	9.30444e+06	0.150665	0.174416	0.197644	0.030303	0.030303	0.237524
tr|Q8IKL9|Q8IKL9_PLAF7	Q8IKL9	PF3D7_1461300	40S ribosomal protein S28e, putative OS=Plasmodium falciparum (isolate 3D7) OX=36329 GN=PF3D7_1461300 PE=1 SV=1	706.3	0	5	tr|Q8IKL9|Q8IKL9_PLAF7	1.11659e+08	9.81798e+07	9.72349e+07	8.09445e+07	9.77765e+07	9.53684e+07	9.81798e+07	9.53684e+07	0.0788302	0.0996335	-0.0419151	0.0555556	0.0555556	0.237872
tr|Q8I280|Q8I280_PLAF7	Q8I280	PF3D7_0106100	V-type proton ATPase subunit C OS=Plasmodium falciparum (isolate 3D7) OX=36329 GN=PF3D7_0106100 PE=3 SV=1	550.91	0	16	tr|Q8I280|Q8I280_PLAF7	1.2713e+07	1.13651e+07	1.14558e+07	1.10472e+07	1.05129e+07	1.07692e+07	1.14558e+07	1.07692e+07	0.0636027	0.0247963	-0.0891709	0.0392157	0	0.238061
sp|Q8I3Z1|MLRR1_PLAF7	Q8I3Z1	PFE0570w	MATH and LRR domain-containing protein PFE0570w OS=Plasmodium falciparum (isolate 3D7) OX=36329 GN=PFE0570w PE=1 SV=1	424.75	0	14	sp|Q8I3Z1|MLRR1_PLAF7	2.45626e+06	2.54166e+06	2.35911e+06	2.85277e+06	2.62083e+06	2.5972e+06	2.45626e+06	2.62083e+06	0.0372437	0.0524954	0.0935572	0	0.0416667	0.23953
tr|A0A143ZY58|A0A143ZY58_PLAF7	A0A143ZY58	PF3D7_1020900	ADP-ribosylation factor OS=Plasmodium falciparum (isolate 3D7) OX=36329 GN=PF3D7_1020900 PE=3 SV=1	704.39	0	10	tr|A0A143ZY58|A0A143ZY58_PLAF7	8.52731e+07	6.5905e+07	6.80509e+07	5.89238e+07	6.58961e+07	6.72384e+07	6.80509e+07	6.58961e+07	0.145287	0.0697237	-0.0464207	0	0	0.239953
tr|Q8I4S8|Q8I4S8_PLAF7	Q8I4S8	PF3D7_1250600	Translation initiation factor eIF-2B subunit beta, putative OS=Plasmodium falciparum (isolate 3D7) OX=36329 GN=PF3D7_1250600 PE=3 SV=1	41.01	0.0036049	1	tr|Q8I4S8|Q8I4S8_PLAF7	1209.13	97036.5	80634.6	77210.5	117273	100338	80634.6	100338	0.859539	0.204643	0.315404	0	0	0.240091
tr|Q8I6T2|Q8I6T2_PLAF7	Q8I6T2	PF3D7_1345700	Isocitrate dehydrogenase [NADP] OS=Plasmodium falciparum (isolate 3D7) OX=36329 GN=PF3D7_1345700 PE=3 SV=1	681.57	0	18	tr|Q8I6T2|Q8I6T2_PLAF7	2.19877e+07	1.88055e+07	1.89246e+07	2.22496e+07	2.15002e+07	2.2048e+07	1.89246e+07	2.2048e+07	0.0906182	0.0176804	0.220384	0.0166667	0	0.241916
tr|Q8II81|Q8II81_PLAF7	Q8II81	PF3D7_1128200	Multiprotein bridging factor type 1, putative OS=Plasmodium falciparum (isolate 3D7) OX=36329 GN=PF3D7_1128200 PE=4 SV=1	457.37	0	11	tr|Q8II81|Q8II81_PLAF7	9.82009e+06	1.21126e+07	1.21635e+07	9.36916e+06	1.07308e+07	1.00762e+07	1.21126e+07	1.00762e+07	0.117772	0.067701	-0.265568	0.119048	0.119048	0.242088
tr|Q8I2M7|Q8I2M7_PLAF7	Q8I2M7	PF3D7_0928200	Uncharacterized protein OS=Plasmodium falciparum (isolate 3D7) OX=36329 GN=PF3D7_0928200 PE=4 SV=1	34.2	0.00684463	1	tr|Q8I2M7|Q8I2M7_PLAF7	187188	98654.1	212578	183651	179890	318638	187188	183651	0.359982	0.347605	-0.027523	0	0	0.242193
tr|Q8IE14|Q8IE14_PLAF7	Q8IE14	PF3D7_1331300	Signal peptidase I OS=Plasmodium falciparum (isolate 3D7) OX=36329 GN=PF3D7_1331300 PE=3 SV=1	223.45	0	4	tr|Q8IE14|Q8IE14_PLAF7	1.15493e+06	822747	972315	1.09995e+06	1.07788e+06	1.16633e+06	972315	1.09995e+06	0.169184	0.0413004	0.177941	0	0	0.242652
tr|Q8IB37|Q8IB37_PLAF7	Q8IB37	PF3D7_0820200	CDP-diacylglycerol--glycerol-3-phosphate 3-phosphatidyltransferase OS=Plasmodium falciparum (isolate 3D7) OX=36329 GN=PF3D7_0820200 PE=3 SV=1	66.36	0.00083682	1	tr|Q8IB37|Q8IB37_PLAF7	76930.4	115257	125933	120624	123262	128854	115257	123262	0.243009	0.03382	0.096872	0	0	0.244632
tr|Q8I1R6|Q8I1R6_PLAF7	Q8I1R6	PF3D7_0417200	Bifunctional dihydrofolate reductase-thymidylate synthase OS=Plasmodium falciparum (isolate 3D7) OX=36329 GN=PF3D7_0417200 PE=3 SV=1	815	0	24	tr|Q8I1R6|Q8I1R6_PLAF7	2.32578e+07	2.10228e+07	2.13468e+07	1.71956e+07	2.01278e+07	2.15075e+07	2.13468e+07	2.01278e+07	0.0552096	0.112291	-0.0848259	0.0215054	0.0107527	0.244752
tr|Q8IJS0|Q8IJS0_PLAF7	Q8IJS0	PF3D7_1012500	Phosphoglucomutase, putative OS=Plasmodium falciparum (isolate 3D7) OX=36329 GN=PF3D7_1012500 PE=3 SV=1	218.25	0	5	tr|Q8IJS0|Q8IJS0_PLAF7	1.91958e+06	1.88511e+06	2.11433e+06	1.76253e+06	1.85615e+06	1.77449e+06	1.91958e+06	1.77449e+06	0.0626442	0.0283424	-0.113389	0.0555556	0	0.244912
tr|Q8I5B6|Q8I5B6_PLAF7	Q8I5B6	PF3D7_1230400	ATP-dependent protease subunit ClpQ OS=Plasmodium falciparum (isolate 3D7) OX=36329 GN=PF3D7_1230400 PE=4 SV=2	167	0	4	tr|Q8I5B6|Q8I5B6_PLAF7	3.40489e+06	2.74988e+06	2.90482e+06	3.80326e+06	3.28296e+06	3.14183e+06	2.90482e+06	3.28296e+06	0.113358	0.102176	0.176546	0.133333	0	0.245161
tr|Q8ILU3|Q8ILU3_PLAF7	Q8ILU3	PF3D7_1415300	RNA-binding protein Nova-1, putative OS=Plasmodium falciparum (isolate 3D7) OX=36329 GN=PF3D7_1415300 PE=4 SV=1	73.08	0.000861326	3	tr|Q8ILU3|Q8ILU3_PLAF7	1.99876e+06	2.30158e+06	2.13583e+06	2.19643e+06	2.54619e+06	2.39018e+06	2.13583e+06	2.39018e+06	0.0706803	0.0736944	0.162321	0	0	0.24652
tr|Q7K6B1|Q7K6B1_PLAF7	Q7K6B1	PF3D7_0817500	Protein kinase c inhibitor-like protein,putative OS=Plasmodium falciparum (isolate 3D7) OX=36329 GN=PF3D7_0817500 PE=4 SV=2	167.35	0	5	tr|Q7K6B1|Q7K6B1_PLAF7	786934	901944	579097	637839	608724	654718	786934	637839	0.216447	0.0367124	-0.30305	0	0	0.248045
tr|Q7KQK0|Q7KQK0_PLAF7	Q7KQK0	PF3D7_1223100	cAMP-dependent protein kinase regulatory subunit OS=Plasmodium falciparum (isolate 3D7) OX=36329 GN=PF3D7_1223100 PE=1 SV=1	455.32	0	15	tr|Q7KQK0|Q7KQK0_PLAF7	1.17497e+07	1.2266e+07	1.11229e+07	1.06762e+07	1.01914e+07	1.11998e+07	1.17497e+07	1.06762e+07	0.0488733	0.0471799	-0.138216	0.037037	0	0.248067
tr|Q8IB60|Q8IB60_PLAF7	Q8IB60	pfsec23	Protein transport protein SEC23 OS=Plasmodium falciparum (isolate 3D7) OX=36329 GN=pfsec23 PE=2 SV=1	807.62	0	21	tr|Q8IB60|Q8IB60_PLAF7	2.87931e+07	2.20992e+07	2.26092e+07	2.19625e+07	2.12459e+07	2.14854e+07	2.26092e+07	2.14854e+07	0.152089	0.0169162	-0.0735508	0	0	0.248264
tr|Q8I447|Q8I447_PLAF7	Q8I447	PF3D7_0505500	DNA mismatch repair protein OS=Plasmodium falciparum (isolate 3D7) OX=36329 GN=PF3D7_0505500 PE=3 SV=1	922.76	0	24	tr|Q8I447|Q8I447_PLAF7	1.72687e+07	1.30453e+07	1.37023e+07	1.18536e+07	1.34749e+07	1.31637e+07	1.37023e+07	1.31637e+07	0.154892	0.0670587	-0.0578465	0.0238095	0	0.24846
tr|Q8I5G5|Q8I5G5_PLAF7	Q8I5G5	PF3D7_1225200	Uncharacterized protein OS=Plasmodium falciparum (isolate 3D7) OX=36329 GN=PF3D7_1225200 PE=4 SV=1	46.04	0.00149254	2	tr|Q8I5G5|Q8I5G5_PLAF7	58422.9	33925.2	52652	44297.2	60387	97019.2	52652	60387	0.264975	0.401874	0.197752	0.333333	0.333333	0.248635
tr|Q8IJS1|Q8IJS1_PLAF7	Q8IJS1	PF3D7_1012400	Hypoxanthine phosphoribosyltransferase OS=Plasmodium falciparum (isolate 3D7) OX=36329 GN=PF3D7_1012400 PE=3 SV=1	1816.55	0	27	tr|Q8IJS1|Q8IJS1_PLAF7	1.5171e+09	1.06468e+09	1.04779e+09	1.0523e+09	9.76091e+08	1.04592e+09	1.06468e+09	1.04592e+09	0.220037	0.0412579	-0.0256394	0.107143	0.125	0.24871
tr|Q8I284|Q8I284_PLAF7	Q8I284	PF3D7_0105700	Asparagine-rich antigen Pfa35-2 OS=Plasmodium falciparum (isolate 3D7) OX=36329 GN=PF3D7_0105700 PE=4 SV=1	35.27	0.00622407	1	tr|Q8I284|Q8I284_PLAF7	10586.4	22107.3	8147.85	10009.3	30781.7	26505.5	10586.4	26505.5	0.547671	0.488981	1.32409	0	0	0.249092
tr|Q8I3V8|Q8I3V8_PLAF7	Q8I3V8	PF3D7_0515000	Pre-mRNA-splicing factor CWC2, putative OS=Plasmodium falciparum (isolate 3D7) OX=36329 GN=PF3D7_0515000 PE=4 SV=1	34.26	0.00684932	2	tr|Q8I3V8|Q8I3V8_PLAF7	788472	646520	852400	770316	870657	980464	788472	870657	0.138204	0.120289	0.143045	0	0	0.249449
tr|Q8IBZ6|Q8IBZ6_PLAF7	Q8IBZ6	PF3D7_0709300	Mediator of RNA polymerase II transcription subunit 14 OS=Plasmodium falciparum (isolate 3D7) OX=36329 GN=PF3D7_0709300 PE=3 SV=1	58.04	0.000807754	2	tr|Q8IBZ6|Q8IBZ6_PLAF7	11980.7	85547.5	126545	130058	126114	80813.5	85547.5	126114	0.777183	0.243606	0.559933	0	0	0.249532
tr|O96153|O96153_PLAF7	O96153	PF3D7_0205900	26S proteasome regulatory subunit RPN1,putative OS=Plasmodium falciparum (isolate 3D7) OX=36329 GN=PF3D7_0205900 PE=4 SV=3	1165.39	0	25	tr|O96153|O96153_PLAF7	3.3574e+07	2.92493e+07	3.18457e+07	2.58462e+07	2.8936e+07	3.05455e+07	3.18457e+07	2.8936e+07	0.0689814	0.083965	-0.138231	0.0196078	0	0.249547
tr|Q8IAK9|Q8IAK9_PLAF7	Q8IAK9	PF3D7_0801000	PRESAN domain-containing protein OS=Plasmodium falciparum (isolate 3D7) OX=36329 GN=PF3D7_0801000 PE=4 SV=1	559.78	0	14	tr|Q8IAK9|Q8IAK9_PLAF7	1.66625e+07	1.33325e+07	1.13593e+07	1.84074e+07	1.4785e+07	1.49303e+07	1.33325e+07	1.49303e+07	0.194447	0.127843	0.163301	0.0196078	0	0.250203
tr|Q8IC01|Q8IC01_PLAF7	Q8IC01	PF3D7_0708800	Heat shock protein 110 OS=Plasmodium falciparum (isolate 3D7) OX=36329 GN=PF3D7_0708800 PE=3 SV=1	2770.46	0	51	tr|Q8IC01|Q8IC01_PLAF7	6.40555e+08	5.57962e+08	5.5172e+08	5.51115e+08	5.19555e+08	5.13369e+08	5.57962e+08	5.19555e+08	0.0849916	0.0383404	-0.102891	0.0121951	0.0121951	0.250296
tr|A0A143ZWK2|A0A143ZWK2_PLAF7	A0A143ZWK2	PF3D7_0207600	Serine repeat antigen 5 OS=Plasmodium falciparum (isolate 3D7) OX=36329 GN=PF3D7_0207600 PE=3 SV=1	1097.83	0	28	tr|A0A143ZWK2|A0A143ZWK2_PLAF7	3.58773e+07	4.70428e+07	4.2245e+07	2.77663e+07	4.17385e+07	3.70012e+07	4.2245e+07	3.70012e+07	0.13425	0.20015	-0.191209	0.0350877	0.0350877	0.250782
tr|Q8I5I4|Q8I5I4_PLAF7	Q8I5I4	PF3D7_1223200	Nucleus export protein BRR6, putative OS=Plasmodium falciparum (isolate 3D7) OX=36329 GN=PF3D7_1223200 PE=4 SV=1	79.71	0	1	tr|Q8I5I4|Q8I5I4_PLAF7	89108.7	541292	325387	521858	407734	402644	325387	407734	0.70989	0.151791	0.32547	0	0	0.251094
tr|C0H551|C0H551_PLAF7	C0H551	PF3D7_0922600	Glutamine synthetase, putative OS=Plasmodium falciparum (isolate 3D7) OX=36329 GN=PF3D7_0922600 PE=3 SV=1	710.57	0	21	tr|C0H551|C0H551_PLAF7	4.53756e+07	3.62365e+07	3.7909e+07	3.30477e+07	3.24716e+07	3.97616e+07	3.7909e+07	3.30477e+07	0.122139	0.115487	-0.197991	0.04	0.106667	0.252333
tr|A0A144A0U7|A0A144A0U7_PLAF7	A0A144A0U7	PF3D7_1213900	W2 domain-containing protein OS=Plasmodium falciparum (isolate 3D7) OX=36329 GN=PF3D7_1213900 PE=4 SV=1	41.27	0.00362582	1	tr|A0A144A0U7|A0A144A0U7_PLAF7	100030	138480	133368	41390.9	119022	118481	133368	118481	0.168449	0.480451	-0.170762	0	0	0.25282
tr|Q8IKP1|Q8IKP1_PLAF7	Q8IKP1	PF3D7_1459000	ATP-dependent RNA helicase DBP5 OS=Plasmodium falciparum (isolate 3D7) OX=36329 GN=PF3D7_1459000 PE=4 SV=1	765.43	0	19	tr|Q8IKP1|Q8IKP1_PLAF7	1.35277e+07	1.61329e+07	1.5313e+07	1.26331e+07	1.33393e+07	1.44686e+07	1.5313e+07	1.33393e+07	0.0888576	0.0686812	-0.199073	0	0	0.252899
tr|A0A143ZY63|A0A143ZY63_PLAF7	A0A143ZY63	PF3D7_1009600	Protein phosphatase OS=Plasmodium falciparum (isolate 3D7) OX=36329 GN=PF3D7_1009600 PE=3 SV=1	42.96	0.0029304	1	tr|A0A143ZY63|A0A143ZY63_PLAF7	118235	145463	155785	131062	191033	175988	145463	175988	0.138735	0.187929	0.274831	0	0	0.253186
tr|Q8IM07|Q8IM07_PLAF7	Q8IM07	PF3D7_1408900	tRNA-dihydrouridine synthase OS=Plasmodium falciparum (isolate 3D7) OX=36329 GN=PF3D7_1408900 PE=3 SV=1	49.76	0.00076864	1	tr|Q8IM07|Q8IM07_PLAF7	459904	254780	201584	246888	202560	209415	254780	209415	0.446605	0.108648	-0.28289	0	0	0.253795
tr|Q8I551|Q8I551_PLAF7	Q8I551	PF3D7_1237200	Uncharacterized protein OS=Plasmodium falciparum (isolate 3D7) OX=36329 GN=PF3D7_1237200 PE=4 SV=1	293.64	0	10	tr|Q8I551|Q8I551_PLAF7	3.40158e+06	2.62856e+06	2.98067e+06	3.21868e+06	3.2708e+06	3.58427e+06	2.98067e+06	3.2708e+06	0.128853	0.0588916	0.134009	0.0333333	0	0.25468
tr|O96210|O96210_PLAF7	O96210	PF3D7_0212900	Leu/Phe-tRNA protein transferase, putative OS=Plasmodium falciparum (isolate 3D7) OX=36329 GN=PF3D7_0212900 PE=4 SV=1	62.88	0.000825083	4	tr|O96210|O96210_PLAF7	1.45326e+06	1.62179e+06	1.85296e+06	1.57556e+06	1.52117e+06	1.20713e+06	1.62179e+06	1.52117e+06	0.122158	0.13863	-0.0924037	0	0	0.25551
tr|Q8IIR9|Q8IIR9_PLAF7	Q8IIR9	PF3D7_1108400	Casein kinase 2, alpha subunit OS=Plasmodium falciparum (isolate 3D7) OX=36329 GN=PF3D7_1108400 PE=1 SV=1	1068.46	0	21	tr|Q8IIR9|Q8IIR9_PLAF7	9.58339e+07	6.18774e+07	6.85254e+07	6.26179e+07	5.95613e+07	6.72475e+07	6.85254e+07	6.26179e+07	0.238626	0.0612878	-0.130064	0.0505051	0.0909091	0.255653
tr|C6KSR4|C6KSR4_PLAF7	C6KSR4	PF3D7_0606600	Uncharacterized protein OS=Plasmodium falciparum (isolate 3D7) OX=36329 GN=PF3D7_0606600 PE=4 SV=1	89.31	0	5	tr|C6KSR4|C6KSR4_PLAF7	700339	623369	507862	742425	638830	695645	623369	695645	0.158682	0.0749362	0.158263	0	0.0666667	0.255994
tr|Q8IDV0|Q8IDV0_PLAF7	Q8IDV0	PF3D7_1338300	Elongation factor 1-gamma, putative OS=Plasmodium falciparum (isolate 3D7) OX=36329 GN=PF3D7_1338300 PE=4 SV=2	1231.58	0	28	tr|Q8IDV0|Q8IDV0_PLAF7	4.57736e+08	2.98521e+08	3.15257e+08	3.00485e+08	2.69522e+08	3.22163e+08	3.15257e+08	3.00485e+08	0.244961	0.088962	-0.0692336	0.034188	0.042735	0.256034
tr|O96259|O96259_PLAF7	O96259	PF3D7_0217900	Uncharacterized protein OS=Plasmodium falciparum (isolate 3D7) OX=36329 GN=PF3D7_0217900 PE=4 SV=1	164.58	0	7	tr|O96259|O96259_PLAF7	3.76484e+06	3.16759e+06	3.59823e+06	2.65156e+06	3.06656e+06	3.57483e+06	3.59823e+06	3.06656e+06	0.0878002	0.14928	-0.230668	0	0	0.256932
tr|Q8IIW2|Q8IIW2_PLAF7	Q8IIW2	PF3D7_1104000	Phenylalanine--tRNA ligase beta subunit OS=Plasmodium falciparum (isolate 3D7) OX=36329 GN=PF3D7_1104000 PE=4 SV=1	468.13	0	15	tr|Q8IIW2|Q8IIW2_PLAF7	1.68342e+07	1.11117e+07	1.15128e+07	1.01731e+07	1.00453e+07	1.25371e+07	1.15128e+07	1.01731e+07	0.242864	0.128517	-0.178479	0	0	0.257079
sp|O97313|RS3A_PLAF7	O97313	MAL3P7.35	40S ribosomal protein S3a OS=Plasmodium falciparum (isolate 3D7) OX=36329 GN=MAL3P7.35 PE=1 SV=1	2053.07	0	37	sp|O97313|RS3A_PLAF7	4.86298e+08	3.69855e+08	4.00694e+08	4.03713e+08	3.48741e+08	3.52444e+08	4.00694e+08	3.52444e+08	0.144002	0.0834238	-0.185109	0.0215054	0.0215054	0.257578
tr|C6KTB1|C6KTB1_PLAF7	C6KTB1	PF3D7_0627500	Protein DJ-1 OS=Plasmodium falciparum (isolate 3D7) OX=36329 GN=PF3D7_0627500 PE=4 SV=1	1041.14	0	17	tr|C6KTB1|C6KTB1_PLAF7	2.50623e+08	2.1257e+08	2.05267e+08	2.09448e+08	1.89814e+08	2.00641e+08	2.1257e+08	2.00641e+08	0.109296	0.0491808	-0.0833214	0.045977	0.0114943	0.25898
tr|Q8I3U6|Q8I3U6_PLAF7	Q8I3U6	PF3D7_0516200	40S ribosomal protein S11 OS=Plasmodium falciparum (isolate 3D7) OX=36329 GN=PF3D7_0516200 PE=1 SV=1	1134.08	0	13	tr|Q8I3U6|Q8I3U6_PLAF7	4.13685e+08	3.06093e+08	3.38964e+08	3.08634e+08	3.11306e+08	3.12106e+08	3.38964e+08	3.11306e+08	0.156231	0.00585232	-0.122797	0.0769231	0.115385	0.260115
tr|Q8ILR6|Q8ILR6_PLAF7	Q8ILR6	PF3D7_1418000	Ubiquitin fusion degradation protein UFD1,putative OS=Plasmodium falciparum (isolate 3D7) OX=36329 GN=PF3D7_1418000 PE=4 SV=2	90.04	0	2	tr|Q8ILR6|Q8ILR6_PLAF7	1.58971e+06	1.19389e+06	1.13653e+06	1.06597e+06	1.17423e+06	1.14864e+06	1.19389e+06	1.14864e+06	0.18884	0.0500909	-0.0557416	0	0	0.260551
tr|Q8IAM2|Q8IAM2_PLAF7	Q8IAM2	PF3D7_0802200	1-cys peroxiredoxin OS=Plasmodium falciparum (isolate 3D7) OX=36329 GN=PF3D7_0802200 PE=4 SV=1	781.92	0	17	tr|Q8IAM2|Q8IAM2_PLAF7	2.05863e+08	2.08958e+08	1.86643e+08	2.03869e+08	1.74975e+08	1.61329e+08	2.05863e+08	1.74975e+08	0.0603002	0.120632	-0.23453	0	0.0133333	0.261256
sp|Q6LFN2|ZNRF1_PLAF7	Q6LFN2	PFF0165c	RING finger protein PFF0165c OS=Plasmodium falciparum (isolate 3D7) OX=36329 GN=PFF0165c PE=1 SV=1	108.04	0	4	sp|Q6LFN2|ZNRF1_PLAF7	1.15073e+06	1.71978e+06	1.58845e+06	1.8727e+06	1.75277e+06	1.53712e+06	1.58845e+06	1.75277e+06	0.200464	0.0988172	0.142024	0	0	0.261979
tr|Q8IKK7|Q8IKK7_PLAF7	Q8IKK7	PF3D7_1462800	Glyceraldehyde-3-phosphate dehydrogenase OS=Plasmodium falciparum (isolate 3D7) OX=36329 GN=PF3D7_1462800 PE=3 SV=1	8283.46	0	45	tr|Q8IKK7|Q8IKK7_PLAF7	9.50925e+09	7.14049e+09	7.62854e+09	7.25812e+09	6.6299e+09	7.45015e+09	7.62854e+09	7.25812e+09	0.154552	0.060317	-0.0718116	0.0142857	0.0142857	0.262544
sp|O97249|RS12_PLAF7	O97249	RPS12	40S ribosomal protein S12 OS=Plasmodium falciparum (isolate 3D7) OX=36329 GN=RPS12 PE=1 SV=1	836.83	0	13	sp|O97249|RS12_PLAF7	2.23874e+08	1.67864e+08	1.43492e+08	1.7108e+08	1.47816e+08	1.25442e+08	1.67864e+08	1.47816e+08	0.231015	0.154075	-0.183488	0.0277778	0.0138889	0.263227
tr|A0A143ZX23|A0A143ZX23_PLAF7	A0A143ZX23	PF3D7_0314100.1	Vesicle transport v-SNARE protein, putative OS=Plasmodium falciparum (isolate 3D7) OX=36329 GN=PF3D7_0314100.1 PE=4 SV=1	61.92	0.000821693	3	tr|A0A143ZX23|A0A143ZX23_PLAF7	168388	142772	118882	152816	153437	188570	142772	153437	0.172714	0.12408	0.103932	0	0.111111	0.263579
tr|Q8II42|Q8II42_PLAF7	Q8II42	PF3D7_1132300	Nucleic acid binding protein, putative OS=Plasmodium falciparum (isolate 3D7) OX=36329 GN=PF3D7_1132300 PE=4 SV=1	152.57	0	6	tr|Q8II42|Q8II42_PLAF7	1.09678e+07	9.4734e+06	9.93095e+06	8.44392e+06	9.39425e+06	9.67016e+06	9.93095e+06	9.39425e+06	0.0756281	0.0701555	-0.0801537	0	0	0.263972
tr|Q8IHU0|Q8IHU0_PLAF7	Q8IHU0	PF3D7_1142500	60S ribosomal protein L28 OS=Plasmodium falciparum (isolate 3D7) OX=36329 GN=PF3D7_1142500 PE=1 SV=1	462.62	0	9	tr|Q8IHU0|Q8IHU0_PLAF7	1.43931e+08	1.1223e+08	1.06986e+08	1.15653e+08	1.02811e+08	9.82941e+07	1.1223e+08	1.02811e+08	0.165133	0.0852957	-0.126461	0	0	0.263998
tr|Q8IKA9|Q8IKA9_PLAF7	Q8IKA9	PF3D7_1472900	Dihydroorotase, putative OS=Plasmodium falciparum (isolate 3D7) OX=36329 GN=PF3D7_1472900 PE=3 SV=1	102.56	0	3	tr|Q8IKA9|Q8IKA9_PLAF7	422279	490196	515795	536973	507056	530053	490196	530053	0.101509	0.02985	0.112775	0.111111	0	0.264357
tr|Q8IKF6|Q8IKF6_PLAF7	Q8IKF6	PF3D7_1468100	Uncharacterized protein OS=Plasmodium falciparum (isolate 3D7) OX=36329 GN=PF3D7_1468100 PE=4 SV=1	2264.67	0	52	tr|Q8IKF6|Q8IKF6_PLAF7	3.23472e+07	3.91334e+07	3.62112e+07	4.43055e+07	4.06302e+07	3.58369e+07	3.62112e+07	4.06302e+07	0.0948259	0.105486	0.166115	0.0277778	0.0222222	0.2652
tr|Q76NN8|Q76NN8_PLAF7	Q76NN8	PF3D7_0106300	Calcium-transporting ATPase OS=Plasmodium falciparum (isolate 3D7) OX=36329 GN=PF3D7_0106300 PE=3 SV=1	1190.43	0	25	tr|Q76NN8|Q76NN8_PLAF7	3.47628e+07	3.32678e+07	3.25547e+07	4.26927e+07	3.53668e+07	3.42546e+07	3.32678e+07	3.53668e+07	0.0336109	0.122456	0.088271	0.0462963	0.0462963	0.265693
tr|Q8IES1|Q8IES1_PLAF7	Q8IES1	PF3D7_1304400	PUB domain-containing protein OS=Plasmodium falciparum (isolate 3D7) OX=36329 GN=PF3D7_1304400 PE=4 SV=1	48.81	0.000759878	1	tr|Q8IES1|Q8IES1_PLAF7	55578.1	13835.5	20549.5	11767.4	15894.6	21665	20549.5	15894.6	0.747464	0.302357	-0.370571	0	0	0.266351
tr|Q8IL42|Q8IL42_PLAF7	Q8IL42	PF3D7_1442900	Protein transport protein SEC7, putative OS=Plasmodium falciparum (isolate 3D7) OX=36329 GN=PF3D7_1442900 PE=4 SV=1	52.14	0.00078064	3	tr|Q8IL42|Q8IL42_PLAF7	14899.9	177251	220476	172963	192382	235766	177251	192382	0.788035	0.160475	0.11818	0.111111	0	0.266364
tr|Q8IEA6|Q8IEA6_PLAF7	Q8IEA6	PF3D7_1320800	Dihydrolipoyllysine-residue succinyltransferase component of 2-oxoglutarate dehydrogenase complex OS=Plasmodium falciparum (isolate 3D7) OX=36329 GN=PF3D7_1320800 PE=4 SV=1	204.85	0	5	tr|Q8IEA6|Q8IEA6_PLAF7	2.97616e+06	3.18517e+06	2.90135e+06	4.06678e+06	3.56653e+06	2.83339e+06	2.97616e+06	3.56653e+06	0.0486964	0.177807	0.261069	0	0	0.266382
tr|Q8I384|Q8I384_PLAF7	Q8I384	PF3D7_0906500	Arginase OS=Plasmodium falciparum (isolate 3D7) OX=36329 GN=PF3D7_0906500 PE=1 SV=1	346.63	0	9	tr|Q8I384|Q8I384_PLAF7	6.28444e+06	7.14775e+06	6.53032e+06	6.12883e+06	5.7233e+06	6.35018e+06	6.53032e+06	6.12883e+06	0.066843	0.0523973	-0.0915404	0.0666667	0	0.268332
tr|Q8IIL9|Q8IIL9_PLAF7	Q8IIL9	PF3D7_1114200	GTPase-activating protein, putative OS=Plasmodium falciparum (isolate 3D7) OX=36329 GN=PF3D7_1114200 PE=4 SV=2	102.05	0	3	tr|Q8IIL9|Q8IIL9_PLAF7	3.7576e+06	2.36431e+06	2.37839e+06	3.82613e+06	3.07973e+06	3.11588e+06	2.37839e+06	3.11588e+06	0.282478	0.125992	0.389657	0.222222	0.333333	0.26874
tr|Q8IC35|Q8IC35_PLAF7	Q8IC35	PF3D7_0703500	Erythrocyte membrane-associated antigen OS=Plasmodium falciparum (isolate 3D7) OX=36329 GN=PF3D7_0703500 PE=4 SV=2	1392.7	0	41	tr|Q8IC35|Q8IC35_PLAF7	5.5264e+07	5.44915e+07	5.20561e+07	4.71846e+07	5.06229e+07	5.10658e+07	5.44915e+07	5.06229e+07	0.0310413	0.0428119	-0.106242	0.02	0.0133333	0.269041
tr|Q8IDS7|Q8IDS7_PLAF7	Q8IDS7	PF3D7_1340900	Phosphate transporter OS=Plasmodium falciparum (isolate 3D7) OX=36329 GN=PF3D7_1340900 PE=3 SV=1	85.31	0	2	tr|Q8IDS7|Q8IDS7_PLAF7	2.89162e+06	2.33613e+06	1.83327e+06	2.06922e+06	2.24144e+06	1.4803e+06	2.33613e+06	2.06922e+06	0.224921	0.206766	-0.175038	0	0	0.269332
tr|Q8IIB5|Q8IIB5_PLAF7	Q8IIB5	PF3D7_1124800	Ribosome biogenesis regulatory protein OS=Plasmodium falciparum (isolate 3D7) OX=36329 GN=PF3D7_1124800 PE=3 SV=1	193.4	0	5	tr|Q8IIB5|Q8IIB5_PLAF7	3.36938e+06	5.22566e+06	5.00438e+06	5.21367e+06	5.02412e+06	5.4264e+06	5.00438e+06	5.21367e+06	0.223664	0.0385442	0.0591065	0	0	0.270355
tr|Q8I5V6|Q8I5V6_PLAF7	Q8I5V6	PF3D7_1209200	U6 snRNA-associated Sm-like protein LSm7,putative OS=Plasmodium falciparum (isolate 3D7) OX=36329 GN=PF3D7_1209200 PE=4 SV=1	76.12	0.00087184	3	tr|Q8I5V6|Q8I5V6_PLAF7	1.93997e+06	1.97536e+07	1.82699e+07	1.84096e+07	1.86239e+07	1.95483e+07	1.82699e+07	1.86239e+07	0.741999	0.032086	0.0276796	0	0	0.270551
tr|C0H529|C0H529_PLAF7	C0H529	PF3D7_0909800	Small nuclear ribonucleoprotein Sm D3 OS=Plasmodium falciparum (isolate 3D7) OX=36329 GN=PF3D7_0909800 PE=3 SV=1	201.88	0	4	tr|C0H529|C0H529_PLAF7	2.61375e+06	4.07486e+06	4.02222e+06	3.6397e+06	4.55133e+06	4.39606e+06	4.02222e+06	4.39606e+06	0.232138	0.116243	0.128217	0	0	0.270751
tr|Q8IJA9|Q8IJA9_PLAF7	Q8IJA9	PF3D7_1029600	Adenosine deaminase OS=Plasmodium falciparum (isolate 3D7) OX=36329 GN=PF3D7_1029600 PE=1 SV=1	1308.91	0	22	tr|Q8IJA9|Q8IJA9_PLAF7	2.52045e+08	2.05255e+08	2.13385e+08	2.03309e+08	1.91048e+08	2.08923e+08	2.13385e+08	2.03309e+08	0.111826	0.0454575	-0.0697822	0.034188	0.034188	0.27099
tr|Q8II79|Q8II79_PLAF7	Q8II79	PF3D7_1128400	Geranylgeranyl pyrophosphate synthase, putative OS=Plasmodium falciparum (isolate 3D7) OX=36329 GN=PF3D7_1128400 PE=3 SV=2	104.76	0	4	tr|Q8II79|Q8II79_PLAF7	3.06515e+06	2.29442e+06	2.23531e+06	2.42843e+06	1.99818e+06	2.14138e+06	2.29442e+06	2.14138e+06	0.182882	0.100076	-0.0995877	0	0	0.271052
tr|Q8IID0|Q8IID0_PLAF7	Q8IID0	PF3D7_1123300	RING zinc finger protein, putative OS=Plasmodium falciparum (isolate 3D7) OX=36329 GN=PF3D7_1123300 PE=4 SV=1	49.58	0.000766871	2	tr|Q8IID0|Q8IID0_PLAF7	187483	286262	230829	204573	204740	191737	230829	204573	0.210819	0.0372317	-0.174209	0	0	0.271156
tr|Q8IDV2|Q8IDV2_PLAF7	Q8IDV2	PF3D7_1338100	26S proteasome regulatory subunit RPN3,putative OS=Plasmodium falciparum (isolate 3D7) OX=36329 GN=PF3D7_1338100 PE=4 SV=1	532.71	0	13	tr|Q8IDV2|Q8IDV2_PLAF7	1.72917e+07	1.84835e+07	2.09104e+07	1.64542e+07	1.68676e+07	1.79405e+07	1.84835e+07	1.68676e+07	0.0975968	0.044893	-0.131981	0.0416667	0.0208333	0.271437
tr|Q8IJK1|Q8IJK1_PLAF7	Q8IJK1	PF3D7_1020000	RNA-binding protein 34, putative OS=Plasmodium falciparum (isolate 3D7) OX=36329 GN=PF3D7_1020000 PE=4 SV=1	124.53	0	4	tr|Q8IJK1|Q8IJK1_PLAF7	547863	621662	537406	710800	666879	549004	547863	666879	0.0807158	0.130277	0.28361	0	0	0.272517
tr|Q8IKX2|Q8IKX2_PLAF7	Q8IKX2	PF3D7_1450400	Zinc finger protein, putative OS=Plasmodium falciparum (isolate 3D7) OX=36329 GN=PF3D7_1450400 PE=4 SV=1	65.7	0.000834028	3	tr|Q8IKX2|Q8IKX2_PLAF7	431537	424521	459392	562520	380600	699986	431537	562520	0.0420638	0.292509	0.382418	0.0833333	0.0833333	0.272566
tr|Q8I3M5|Q8I3M5_PLAF7	Q8I3M5	PF3D7_0524000	Karyopherin beta OS=Plasmodium falciparum (isolate 3D7) OX=36329 GN=PF3D7_0524000 PE=4 SV=1	3715.31	0	63	tr|Q8I3M5|Q8I3M5_PLAF7	3.3022e+08	2.37966e+08	2.43173e+08	2.33771e+08	2.22026e+08	2.47308e+08	2.43173e+08	2.33771e+08	0.191624	0.0539818	-0.0568836	0.03663	0.018315	0.27311
tr|C0H5A0|C0H5A0_PLAF7	C0H5A0	PF3D7_1305300	Uncharacterized protein OS=Plasmodium falciparum (isolate 3D7) OX=36329 GN=PF3D7_1305300 PE=4 SV=1	409.04	0	12	tr|C0H5A0|C0H5A0_PLAF7	6.36438e+06	2.67479e+06	2.63746e+06	2.65694e+06	2.44292e+06	2.8284e+06	2.67479e+06	2.65694e+06	0.550084	0.0730796	-0.00966087	0.0952381	0.0714286	0.27317
tr|Q8I1Y6|Q8I1Y6_PLAF7	Q8I1Y6	PF3D7_0404300	RanBD1 domain-containing protein OS=Plasmodium falciparum (isolate 3D7) OX=36329 GN=PF3D7_0404300 PE=4 SV=2	144.14	0	4	tr|Q8I1Y6|Q8I1Y6_PLAF7	4.96923e+06	4.18815e+06	4.30342e+06	4.2072e+06	3.80199e+06	4.17029e+06	4.30342e+06	4.17029e+06	0.09397	0.0551884	-0.0453357	0	0	0.273243
tr|Q8IL83|Q8IL83_PLAF7	Q8IL83	PF3D7_1438500	Cleavage and polyadenylation specificity factor subunit 3, putative OS=Plasmodium falciparum (isolate 3D7) OX=36329 GN=PF3D7_1438500 PE=4 SV=1	42.73	0.00292184	2	tr|Q8IL83|Q8IL83_PLAF7	33062.5	354720	476529	362863	396908	471695	354720	396908	0.795253	0.135625	0.162121	0	0	0.273382
tr|Q8IKN3|Q8IKN3_PLAF7	Q8IKN3	PF3D7_1459800	Bax inhibitor 1, putative OS=Plasmodium falciparum (isolate 3D7) OX=36329 GN=PF3D7_1459800 PE=3 SV=2	77.9	0	2	tr|Q8IKN3|Q8IKN3_PLAF7	830643	1.31646e+06	1.20586e+06	1.1972e+06	1.4255e+06	1.27065e+06	1.20586e+06	1.27065e+06	0.227832	0.089802	0.0755076	0	0	0.273419
tr|Q8IDG3|Q8IDG3_PLAF7	Q8IDG3	PF3D7_1353800	Proteasome subunit alpha type OS=Plasmodium falciparum (isolate 3D7) OX=36329 GN=PF3D7_1353800 PE=1 SV=1	628.73	0	12	tr|Q8IDG3|Q8IDG3_PLAF7	4.01218e+07	3.51339e+07	4.00009e+07	2.90984e+07	3.51238e+07	3.85427e+07	4.00009e+07	3.51238e+07	0.0740648	0.139593	-0.187585	0	0	0.273627
tr|Q8I2Y3|Q8I2Y3_PLAF7	Q8I2Y3	PF3D7_0917000	Uncharacterized protein OS=Plasmodium falciparum (isolate 3D7) OX=36329 GN=PF3D7_0917000 PE=4 SV=1	31.87	0.0094086	2	tr|Q8I2Y3|Q8I2Y3_PLAF7	77350.7	118357	150515	127613	135709	149331	118357	135709	0.317753	0.0797942	0.197376	0	0	0.273926
tr|Q8IK90|Q8IK90_PLAF7	Q8IK90	PF3D7_1474800	Proteasome endopeptidase complex OS=Plasmodium falciparum (isolate 3D7) OX=36329 GN=PF3D7_1474800 PE=1 SV=1	431.28	0	10	tr|Q8IK90|Q8IK90_PLAF7	5.81121e+07	5.89926e+07	5.86492e+07	4.98574e+07	5.29948e+07	5.82806e+07	5.86492e+07	5.29948e+07	0.00757499	0.0792581	-0.146259	0	0	0.274215
tr|O96164|O96164_PLAF7	O96164	PF3D7_0207700	Serine repeat antigen 4 OS=Plasmodium falciparum (isolate 3D7) OX=36329 GN=PF3D7_0207700 PE=1 SV=1	102.48	0	3	tr|O96164|O96164_PLAF7	956920	1.46319e+06	1.3181e+06	572096	1.29923e+06	1.06576e+06	1.3181e+06	1.06576e+06	0.209225	0.379198	-0.306566	0	0	0.274538
tr|Q8ID85|Q8ID85_PLAF7	Q8ID85	PF3D7_1362200	RuvB-like helicase OS=Plasmodium falciparum (isolate 3D7) OX=36329 GN=PF3D7_1362200 PE=3 SV=1	884.56	0	16	tr|Q8ID85|Q8ID85_PLAF7	2.22991e+07	2.01853e+07	2.06806e+07	2.21076e+07	2.24688e+07	2.43358e+07	2.06806e+07	2.24688e+07	0.0525041	0.0520619	0.119642	0	0	0.275101
tr|Q8IDX8|Q8IDX8_PLAF7	Q8IDX8	PF3D7_1335100	Merozoite surface protein 7 OS=Plasmodium falciparum (isolate 3D7) OX=36329 GN=PF3D7_1335100 PE=4 SV=1	197.17	0	6	tr|Q8IDX8|Q8IDX8_PLAF7	7.93597e+06	7.06813e+06	4.6364e+06	6.34122e+06	5.34367e+06	3.93589e+06	7.06813e+06	5.34367e+06	0.261263	0.232091	-0.403497	0.047619	0	0.275478
tr|Q8II82|Q8II82_PLAF7	Q8II82	PF3D7_1128100	Cochaperone prefoldin complex subunit, putative OS=Plasmodium falciparum (isolate 3D7) OX=36329 GN=PF3D7_1128100 PE=4 SV=1	283.46	0	8	tr|Q8II82|Q8II82_PLAF7	9.6359e+06	9.1232e+06	9.02172e+06	7.01055e+06	8.14903e+06	9.67637e+06	9.1232e+06	8.14903e+06	0.0355538	0.161576	-0.162912	0	0	0.275603
tr|Q8IAW0|Q8IAW0_PLAF7	Q8IAW0	PF3D7_0812400	Importin subunit alpha OS=Plasmodium falciparum (isolate 3D7) OX=36329 GN=PF3D7_0812400 PE=3 SV=1	1111.8	0	19	tr|Q8IAW0|Q8IAW0_PLAF7	7.37683e+07	8.90724e+07	8.69559e+07	9.16741e+07	8.79297e+07	9.5188e+07	8.69559e+07	9.16741e+07	0.099593	0.0396272	0.0762291	0.0357143	0.0357143	0.276532
tr|Q8IK34|Q8IK34_PLAF7	Q8IK34	PF3D7_1000400	Rifin OS=Plasmodium falciparum (isolate 3D7) OX=36329 GN=PF3D7_1000400 PE=4 SV=1	45.22	0.00148368	1	tr|Q8IK34|Q8IK34_PLAF7	37472.8	17759.1	20937	19372.1	24551.7	10933	20937	19372.1	0.416874	0.375927	-0.112078	0	0	0.277655
tr|Q8IIF6|Q8IIF6_PLAF7	Q8IIF6	PF3D7_1121100	Uncharacterized protein OS=Plasmodium falciparum (isolate 3D7) OX=36329 GN=PF3D7_1121100 PE=4 SV=2	105.82	0	6	tr|Q8IIF6|Q8IIF6_PLAF7	425194	883504	714431	821732	759141	847083	714431	821732	0.343674	0.055931	0.201874	0	0	0.277859
tr|C6KTD8|C6KTD8_PLAF7	C6KTD8	PF3D7_0630300	DNA polymerase epsilon catalytic subunit A,putative OS=Plasmodium falciparum (isolate 3D7) OX=36329 GN=PF3D7_0630300 PE=4 SV=1	145.32	0	2	tr|C6KTD8|C6KTD8_PLAF7	280482	158530	147477	180845	119573	147408	158530	147408	0.377538	0.205518	-0.104937	0.166667	0	0.27808
tr|C0H4C4|C0H4C4_PLAF7	C0H4C4	PF3D7_0504800	Uncharacterized protein OS=Plasmodium falciparum (isolate 3D7) OX=36329 GN=PF3D7_0504800 PE=4 SV=1	42.08	0.00363636	2	tr|C0H4C4|C0H4C4_PLAF7	106429	94235.1	107051	97068	96242.7	87055.2	106429	96242.7	0.0704525	0.0594724	-0.14514	0	0	0.278208
tr|Q8IKD1|Q8IKD1_PLAF7	Q8IKD1	PF3D7_1470700	Uncharacterized protein OS=Plasmodium falciparum (isolate 3D7) OX=36329 GN=PF3D7_1470700 PE=4 SV=1	154.71	0	4	tr|Q8IKD1|Q8IKD1_PLAF7	730287	659641	877515	845518	753032	998251	730287	845518	0.14707	0.143065	0.211372	0	0	0.279467
tr|Q8IJH3|Q8IJH3_PLAF7	Q8IJH3	PF3D7_1023200	Orotidine 5'-phosphate decarboxylase OS=Plasmodium falciparum (isolate 3D7) OX=36329 GN=PF3D7_1023200 PE=1 SV=1	123.35	0	4	tr|Q8IJH3|Q8IJH3_PLAF7	6.21749e+06	4.65821e+06	4.9027e+06	4.56372e+06	4.13964e+06	5.11006e+06	4.9027e+06	4.56372e+06	0.159452	0.105656	-0.103365	0	0	0.279931
tr|Q8IEN2|Q8IEN2_PLAF7	Q8IEN2	PF3D7_1308300	40S ribosomal protein S27 OS=Plasmodium falciparum (isolate 3D7) OX=36329 GN=PF3D7_1308300 PE=1 SV=1	379.25	0	6	tr|Q8IEN2|Q8IEN2_PLAF7	1.6979e+08	1.04935e+08	8.65217e+07	1.09013e+08	8.7267e+07	8.3206e+07	1.04935e+08	8.7267e+07	0.363237	0.148955	-0.26599	0	0	0.280353
tr|Q8IBS1|Q8IBS1_PLAF7	Q8IBS1	PF3D7_0717900	Thioredoxin-like protein OS=Plasmodium falciparum (isolate 3D7) OX=36329 GN=PF3D7_0717900 PE=4 SV=1	58.89	0.000811688	2	tr|Q8IBS1|Q8IBS1_PLAF7	369490	285819	368816	447603	386884	338229	368816	386884	0.140941	0.140181	0.0689991	0	0	0.280988
tr|Q8ID52|Q8ID52_PLAF7	Q8ID52	PF3D7_1365700	SNARE associated Golgi protein, putative OS=Plasmodium falciparum (isolate 3D7) OX=36329 GN=PF3D7_1365700 PE=4 SV=1	81.75	0	1	tr|Q8ID52|Q8ID52_PLAF7	1.22916e+06	1.2181e+06	960759	1.50139e+06	1.13544e+06	1.25861e+06	1.2181e+06	1.25861e+06	0.133688	0.143401	0.047195	0	0	0.282477
tr|C0H4V6|C0H4V6_PLAF7	C0H4V6	PF3D7_0818200	14-3-3 protein OS=Plasmodium falciparum (isolate 3D7) OX=36329 GN=PF3D7_0818200 PE=3 SV=1	2240.03	0	30	tr|C0H4V6|C0H4V6_PLAF7	4.43985e+08	4.48292e+08	4.26235e+08	4.2944e+08	4.32364e+08	3.06096e+08	4.43985e+08	4.2944e+08	0.026601	0.185131	-0.0480531	0.025641	0.0192308	0.282536
tr|C0H5I7|C0H5I7_PLAF7	C0H5I7	PF3D7_1357800	T-complex protein 1 subunit delta OS=Plasmodium falciparum (isolate 3D7) OX=36329 GN=PF3D7_1357800 PE=3 SV=1	1596.64	0	36	tr|C0H5I7|C0H5I7_PLAF7	1.61195e+08	1.43602e+08	1.51057e+08	1.3771e+08	1.33045e+08	1.47252e+08	1.51057e+08	1.3771e+08	0.0581147	0.0519712	-0.133462	0.0227273	0.0227273	0.284427
tr|C0H4U0|C0H4U0_PLAF7	C0H4U0	PF3D7_0811400	Uncharacterized protein OS=Plasmodium falciparum (isolate 3D7) OX=36329 GN=PF3D7_0811400 PE=4 SV=1	803.08	0	18	tr|C0H4U0|C0H4U0_PLAF7	2.14222e+07	1.42658e+07	1.52186e+07	1.45909e+07	1.37056e+07	1.50963e+07	1.52186e+07	1.45909e+07	0.229009	0.0486701	-0.0607674	0.04	0.0533333	0.285257
tr|Q8IK93|Q8IK93_PLAF7	Q8IK93	PF3D7_1474500	Splicing factor 3A subunit 1, putative OS=Plasmodium falciparum (isolate 3D7) OX=36329 GN=PF3D7_1474500 PE=4 SV=1	54.52	0.000789266	2	tr|Q8IK93|Q8IK93_PLAF7	72872.2	609848	536183	527342	622733	525303	536183	527342	0.716458	0.0996885	-0.0239865	0	0	0.28579
tr|Q8I5W2|Q8I5W2_PLAF7	Q8I5W2	PF3D7_1208600	Mitochondrial import inner membrane translocase subunit TIM10, putative OS=Plasmodium falciparum (isolate 3D7) OX=36329 GN=PF3D7_1208600 PE=4 SV=1	83.5	0	2	tr|Q8I5W2|Q8I5W2_PLAF7	66923.9	275660	170341	327386	217979	166139	170341	217979	0.610437	0.347088	0.355764	0.111111	0.111111	0.28654
tr|Q8I713|Q8I713_PLAF7	Q8I713	PF3D7_1109900	60S ribosomal protein L36 OS=Plasmodium falciparum (isolate 3D7) OX=36329 GN=PF3D7_1109900 PE=1 SV=2	529.2	0	7	tr|Q8I713|Q8I713_PLAF7	1.36061e+08	1.29155e+08	1.27909e+08	1.35381e+08	1.21994e+08	8.83035e+07	1.29155e+08	1.21994e+08	0.0335091	0.210521	-0.0822934	0	0	0.286787
tr|Q8I2A1|Q8I2A1_PLAF7	Q8I2A1	PF3D7_0103900	Parasite-infected erythrocyte surface protein OS=Plasmodium falciparum (isolate 3D7) OX=36329 GN=PF3D7_0103900 PE=4 SV=1	465.73	0	11	tr|Q8I2A1|Q8I2A1_PLAF7	7.77205e+06	6.37799e+06	6.4048e+06	6.90345e+06	7.65451e+06	8.36437e+06	6.4048e+06	7.65451e+06	0.116357	0.0956131	0.257156	0.0888889	0.0666667	0.287002
tr|Q8I310|Q8I310_PLAF7	Q8I310	PF3D7_0914200	Phospholipid or glycerol acyltransferase,putative OS=Plasmodium falciparum (isolate 3D7) OX=36329 GN=PF3D7_0914200 PE=4 SV=1	101.14	0	3	tr|Q8I310|Q8I310_PLAF7	1.53232e+06	950511	1.03032e+06	1.55464e+06	1.3674e+06	1.19104e+06	1.03032e+06	1.3674e+06	0.269335	0.132619	0.408346	0	0	0.287355
tr|Q8IDE0|Q8IDE0_PLAF7	Q8IDE0	PF3D7_1356200	Mitochondrial import inner membrane translocase subunit TIM23, putative OS=Plasmodium falciparum (isolate 3D7) OX=36329 GN=PF3D7_1356200 PE=4 SV=1	38.69	0.00425834	1	tr|Q8IDE0|Q8IDE0_PLAF7	1.43319e+06	1.27202e+06	1.07067e+06	1.59111e+06	1.34597e+06	1.31878e+06	1.27202e+06	1.34597e+06	0.144309	0.105735	0.0815203	0	0	0.28737
tr|A0A144A308|A0A144A308_PLAF7	A0A144A308	PF3D7_1136500.1	Casein kinase 1 OS=Plasmodium falciparum (isolate 3D7) OX=36329 GN=PF3D7_1136500.1 PE=3 SV=1	714.6	0	15	tr|A0A144A308|A0A144A308_PLAF7	3.44591e+07	2.26171e+07	2.31718e+07	2.0218e+07	2.13852e+07	2.55686e+07	2.31718e+07	2.13852e+07	0.249824	0.125653	-0.115763	0.0333333	0	0.287377
tr|Q8IEL0|Q8IEL0_PLAF7	Q8IEL0	PF3D7_1310500	DUF2012 domain-containing protein OS=Plasmodium falciparum (isolate 3D7) OX=36329 GN=PF3D7_1310500 PE=4 SV=1	113.07	0	5	tr|Q8IEL0|Q8IEL0_PLAF7	3.94407e+06	3.07927e+06	3.43424e+06	3.56608e+06	3.71886e+06	4.55056e+06	3.43424e+06	3.71886e+06	0.124706	0.134296	0.114872	0	0	0.288555
tr|Q8I359|Q8I359_PLAF7	Q8I359	PF3D7_0909300	Apoptosis-related protein OS=Plasmodium falciparum (isolate 3D7) OX=36329 GN=PF3D7_0909300 PE=4 SV=2	218.58	0	7	tr|Q8I359|Q8I359_PLAF7	2.12295e+06	2.73293e+06	2.73228e+06	1.9825e+06	2.65918e+06	1.94829e+06	2.73228e+06	1.9825e+06	0.139158	0.182514	-0.462787	0.0833333	0.125	0.288621
tr|Q8I2U5|Q8I2U5_PLAF7	Q8I2U5	PF3D7_0920800	Inosine-5'-monophosphate dehydrogenase OS=Plasmodium falciparum (isolate 3D7) OX=36329 GN=PF3D7_0920800 PE=3 SV=1	1339.08	0	27	tr|Q8I2U5|Q8I2U5_PLAF7	8.22208e+07	7.10531e+07	7.82889e+07	7.57865e+07	6.71933e+07	6.81661e+07	7.82889e+07	6.81661e+07	0.0733895	0.0668588	-0.199752	0	0.00952381	0.288987
tr|C6KSW2|C6KSW2_PLAF7	C6KSW2	PF3D7_0611800	Uncharacterized protein OS=Plasmodium falciparum (isolate 3D7) OX=36329 GN=PF3D7_0611800 PE=4 SV=1	32.84	0.00811359	1	tr|C6KSW2|C6KSW2_PLAF7	198761	106475	109942	153487	162194	174497	109942	162194	0.377976	0.0646066	0.560975	0	0	0.289427
tr|Q8I549|Q8I549_PLAF7	Q8I549	PF3D7_1237400	Lactamase_B domain-containing protein OS=Plasmodium falciparum (isolate 3D7) OX=36329 GN=PF3D7_1237400 PE=4 SV=1	49.6	0.00076746	1	tr|Q8I549|Q8I549_PLAF7	915671	718757	896289	662510	794288	786772	896289	786772	0.128651	0.0989601	-0.188017	0	0	0.289428
sp|O77384|LRR4_PLAF7	O77384	PFC0760c	Protein PFC0760c OS=Plasmodium falciparum (isolate 3D7) OX=36329 GN=PFC0760c PE=1 SV=1	45.62	0.0014881	2	sp|O77384|LRR4_PLAF7	633962	507292	553554	597126	629348	635472	553554	629348	0.11346	0.0331915	0.185134	0	0	0.289448
tr|Q8IJT3|Q8IJT3_PLAF7	Q8IJT3	PF3D7_1011200.1	t-SNARE coiled-coil homology domain-containing protein OS=Plasmodium falciparum (isolate 3D7) OX=36329 GN=PF3D7_1011200.1 PE=4 SV=2	70.68	0.000851064	2	tr|Q8IJT3|Q8IJT3_PLAF7	1.07669e+06	1.14369e+06	1.26942e+06	1.21892e+06	1.1779e+06	1.56721e+06	1.14369e+06	1.21892e+06	0.0841103	0.161891	0.091905	0	0	0.289846
tr|Q8ILV4|Q8ILV4_PLAF7	Q8ILV4	PF3D7_1414100	CCHC-type domain-containing protein OS=Plasmodium falciparum (isolate 3D7) OX=36329 GN=PF3D7_1414100 PE=4 SV=1	32.64	0.00877193	1	tr|Q8ILV4|Q8ILV4_PLAF7	44306	27669.3	3614.72	35838.4	32027.1	34283.6	27669.3	34283.6	0.811933	0.0562831	0.309229	0	0.333333	0.290094
tr|Q8I524|Q8I524_PLAF7	Q8I524	PF3D7_1239900	Vacuolar protein sorting-associated protein 16,putative OS=Plasmodium falciparum (isolate 3D7) OX=36329 GN=PF3D7_1239900 PE=4 SV=1	90.94	0	1	tr|Q8I524|Q8I524_PLAF7	248553	51636.7	102104	30200.7	118349	66110.6	102104	66110.6	0.762744	0.619473	-0.627092	0	0	0.29092
tr|Q8ILR8|Q8ILR8_PLAF7	Q8ILR8	PF3D7_1417700	Uncharacterized protein OS=Plasmodium falciparum (isolate 3D7) OX=36329 GN=PF3D7_1417700 PE=4 SV=1	194.74	0	5	tr|Q8ILR8|Q8ILR8_PLAF7	488241	2.80517e+06	2.54124e+06	2.08587e+06	3.21466e+06	2.70521e+06	2.54124e+06	2.70521e+06	0.652159	0.211829	0.0902073	0.111111	0.111111	0.291008
tr|C0H4E7|C0H4E7_PLAF7	C0H4E7	PF3D7_0518200	SWIB/MDM2 domain-containing protein, putative OS=Plasmodium falciparum (isolate 3D7) OX=36329 GN=PF3D7_0518200 PE=4 SV=1	35.9	0.00555556	2	tr|C0H4E7|C0H4E7_PLAF7	527151	511020	572579	479467	564082	385641	527151	479467	0.0594511	0.187365	-0.136783	0	0	0.293398
tr|Q8IJV6|Q8IJV6_PLAF7	Q8IJV6	PF3D7_1008900	Adenylate kinase OS=Plasmodium falciparum (isolate 3D7) OX=36329 GN=PF3D7_1008900 PE=3 SV=1	1272.91	0	26	tr|Q8IJV6|Q8IJV6_PLAF7	1.17882e+08	1.35894e+08	1.2208e+08	1.36849e+08	1.44262e+08	1.29258e+08	1.2208e+08	1.36849e+08	0.0752249	0.0548441	0.164766	0	0	0.294199
tr|Q8IIW5|Q8IIW5_PLAF7	Q8IIW5	PF3D7_1103700	Casein kinase II subunit beta OS=Plasmodium falciparum (isolate 3D7) OX=36329 GN=PF3D7_1103700 PE=3 SV=1	285.39	0	9	tr|Q8IIW5|Q8IIW5_PLAF7	1.25141e+07	9.34377e+06	9.36247e+06	1.0109e+07	9.07158e+06	8.03611e+06	9.36247e+06	9.07158e+06	0.175366	0.114245	-0.0455341	0.0277778	0.0555556	0.2942
tr|Q8I4Z4|Q8I4Z4_PLAF7	Q8I4Z4	PF3D7_1243600	Translation initiation factor SUI1, putative OS=Plasmodium falciparum (isolate 3D7) OX=36329 GN=PF3D7_1243600 PE=4 SV=1	500.78	0	8	tr|Q8I4Z4|Q8I4Z4_PLAF7	1.76062e+07	2.33486e+07	2.06653e+07	1.70439e+07	2.05456e+07	1.68436e+07	2.06653e+07	1.70439e+07	0.139884	0.114742	-0.277955	0	0	0.294415
tr|Q8IIM9|Q8IIM9_PLAF7	Q8IIM9	PF3D7_1113300	UDP-galactose transporter, putative OS=Plasmodium falciparum (isolate 3D7) OX=36329 GN=PF3D7_1113300 PE=4 SV=1	33.38	0.00748299	1	tr|Q8IIM9|Q8IIM9_PLAF7	1.14357e+06	633461	638929	712895	691150	465066	638929	691150	0.363765	0.220273	0.113341	0	0	0.294643
tr|O96230|O96230_PLAF7	O96230	PF3D7_0215000	Acyl-CoA synthetase OS=Plasmodium falciparum (isolate 3D7) OX=36329 GN=PF3D7_0215000 PE=4 SV=1	105.76	0	3	tr|O96230|O96230_PLAF7	1.4944e+06	320299	435250	320268	369717	452804	435250	369717	0.863009	0.175822	-0.235422	0.111111	0	0.296271
tr|Q8I5T4|Q8I5T4_PLAF7	Q8I5T4	PF3D7_1211700	DNA replication licensing factor MCM5, putative OS=Plasmodium falciparum (isolate 3D7) OX=36329 GN=PF3D7_1211700 PE=3 SV=1	1089.37	0	29	tr|Q8I5T4|Q8I5T4_PLAF7	3.71874e+07	3.38416e+07	3.62746e+07	2.98474e+07	3.42584e+07	3.42375e+07	3.62746e+07	3.42375e+07	0.0483529	0.0775045	-0.0833826	0.020202	0	0.29679
tr|Q8I0V3|Q8I0V3_PLAF7	Q8I0V3	PF3D7_1232100	60 kDa chaperonin OS=Plasmodium falciparum (isolate 3D7) OX=36329 GN=PF3D7_1232100 PE=3 SV=2	1587.92	0	34	tr|Q8I0V3|Q8I0V3_PLAF7	9.96548e+07	8.48376e+07	8.51922e+07	9.88658e+07	9.49524e+07	1.00274e+08	8.51922e+07	9.88658e+07	0.0940455	0.0281268	0.21475	0.0217391	0.0217391	0.297275
tr|Q8IBX7|Q8IBX7_PLAF7	Q8IBX7	PF3D7_0711300	Uncharacterized protein OS=Plasmodium falciparum (isolate 3D7) OX=36329 GN=PF3D7_0711300 PE=4 SV=1	70.99	0.000853242	2	tr|Q8IBX7|Q8IBX7_PLAF7	1.75179e+06	2.26827e+06	2.19949e+06	2.31784e+06	2.39593e+06	2.17663e+06	2.19949e+06	2.31784e+06	0.135275	0.0483952	0.075614	0	0	0.297439
tr|C6KT76|C6KT76_PLAF7	C6KT76	PF3D7_0624000	Phosphotransferase OS=Plasmodium falciparum (isolate 3D7) OX=36329 GN=PF3D7_0624000 PE=3 SV=1	1682.49	0	34	tr|C6KT76|C6KT76_PLAF7	1.74859e+08	1.70497e+08	1.8247e+08	1.6353e+08	1.45803e+08	1.74431e+08	1.74859e+08	1.6353e+08	0.0344413	0.089604	-0.0966359	0.0444444	0.037037	0.297514
tr|Q8IDR1|Q8IDR1_PLAF7	Q8IDR1	PF3D7_1342800	Phosphoenolpyruvate carboxykinase OS=Plasmodium falciparum (isolate 3D7) OX=36329 GN=PF3D7_1342800 PE=3 SV=1	401.34	0	9	tr|Q8IDR1|Q8IDR1_PLAF7	4.422e+06	5.27918e+06	5.39679e+06	5.75925e+06	5.19037e+06	5.65475e+06	5.27918e+06	5.65475e+06	0.10573	0.054712	0.0991504	0	0	0.297604
tr|Q8I0X0|Q8I0X0_PLAF7	Q8I0X0	PF3D7_0509000	SNAP protein (Soluble N-ethylmaleimide-sensitive factor attachment protein), putative OS=Plasmodium falciparum (isolate 3D7) OX=36329 GN=PF3D7_0509000 PE=4 SV=1	109.56	0	5	tr|Q8I0X0|Q8I0X0_PLAF7	1.29741e+06	1.30608e+06	1.37006e+06	1.00259e+06	1.43809e+06	1.10991e+06	1.30608e+06	1.10991e+06	0.0299563	0.191707	-0.234809	0.0666667	0.0666667	0.298364
tr|Q8IJ60|Q8IJ60_PLAF7	Q8IJ60	PF3D7_1034900	Methionine--tRNA ligase OS=Plasmodium falciparum (isolate 3D7) OX=36329 GN=PF3D7_1034900 PE=3 SV=1	1549.78	0	39	tr|Q8IJ60|Q8IJ60_PLAF7	7.05746e+07	5.72186e+07	6.55984e+07	5.55247e+07	5.84333e+07	6.12543e+07	6.55984e+07	5.84333e+07	0.104708	0.0490531	-0.16687	0.0272109	0.00680272	0.299206
tr|Q8IAN7|Q8IAN7_PLAF7	Q8IAN7	PF3D7_0803700	Tubulin gamma chain OS=Plasmodium falciparum (isolate 3D7) OX=36329 GN=PF3D7_0803700 PE=3 SV=1	418.45	0	12	tr|Q8IAN7|Q8IAN7_PLAF7	8.38841e+06	8.56295e+06	8.07055e+06	9.37911e+06	9.08903e+06	8.59211e+06	8.38841e+06	9.08903e+06	0.0299318	0.0441246	0.115728	0	0	0.29987
tr|Q8IB50|Q8IB50_PLAF7	Q8IB50	PF3D7_0821600	Clp1-related protein, putative OS=Plasmodium falciparum (isolate 3D7) OX=36329 GN=PF3D7_0821600 PE=3 SV=1	42.04	0.00363372	1	tr|Q8IB50|Q8IB50_PLAF7	464807	355108	356757	351851	356184	337486	356757	351851	0.160277	0.0280837	-0.0199746	0	0	0.300337
tr|Q8IL48|Q8IL48_PLAF7	Q8IL48	PF3D7_1442300	tRNA binding protein, putative OS=Plasmodium falciparum (isolate 3D7) OX=36329 GN=PF3D7_1442300 PE=4 SV=1	501.57	0	16	tr|Q8IL48|Q8IL48_PLAF7	1.30753e+07	1.25069e+07	1.30961e+07	1.10557e+07	1.09923e+07	1.33077e+07	1.30753e+07	1.10557e+07	0.0259305	0.111907	-0.242046	0.0196078	0.0392157	0.300676
tr|Q8ILF7|Q8ILF7_PLAF7	Q8ILF7	PF3D7_1430700	Glutamate dehydrogenase OS=Plasmodium falciparum (isolate 3D7) OX=36329 GN=PF3D7_1430700 PE=1 SV=1	97.4	0	2	tr|Q8ILF7|Q8ILF7_PLAF7	1.57482e+06	784932	800231	631889	876546	861863	800231	861863	0.428823	0.173663	0.107041	0.222222	0	0.300768
sp|C6KT50|PDX1_PLAF7	C6KT50	pdx1	Pyridoxal 5'-phosphate synthase subunit Pdx1 OS=Plasmodium falciparum (isolate 3D7) OX=36329 GN=pdx1 PE=1 SV=1	1604.56	0	24	sp|C6KT50|PDX1_PLAF7	2.2985e+08	1.83186e+08	1.9467e+08	2.0842e+08	1.66086e+08	1.66294e+08	1.9467e+08	1.66294e+08	0.120028	0.135253	-0.22729	0.0350877	0.0438596	0.301528
tr|Q8I5D5|Q8I5D5_PLAF7	Q8I5D5	PF3D7_1228300	NIMA related kinase 1 OS=Plasmodium falciparum (isolate 3D7) OX=36329 GN=PF3D7_1228300 PE=4 SV=1	32.66	0.00877785	1	tr|Q8I5D5|Q8I5D5_PLAF7	45568.5	34165.9	27899.1	51648.4	13802.6	18627.7	34165.9	18627.7	0.249688	0.734996	-0.875113	0	0	0.301859
tr|Q8IIZ7|Q8IIZ7_PLAF7	Q8IIZ7	PF3D7_1041200	Rifin OS=Plasmodium falciparum (isolate 3D7) OX=36329 GN=PF3D7_1041200 PE=4 SV=1	189.36	0	6	tr|Q8IIZ7|Q8IIZ7_PLAF7	8.86137e+06	9.23247e+06	7.50848e+06	1.67282e+07	8.48848e+06	8.50975e+06	8.86137e+06	8.50975e+06	0.106325	0.422614	-0.0584134	0.047619	0.047619	0.303808
tr|Q76NM3|Q76NM3_PLAF7	Q76NM3	PF3D7_1324900	L-lactate dehydrogenase OS=Plasmodium falciparum (isolate 3D7) OX=36329 GN=PF3D7_1324900 PE=1 SV=1	2398.23	0	29	tr|Q76NM3|Q76NM3_PLAF7	1.68541e+09	1.3103e+09	1.29839e+09	1.27418e+09	1.17466e+09	1.36474e+09	1.3103e+09	1.27418e+09	0.153762	0.0747929	-0.0403243	0.020202	0.0252525	0.304377
tr|Q8IHN5|Q8IHN5_PLAF7	Q8IHN5	PF3D7_1148900	Uncharacterized protein OS=Plasmodium falciparum (isolate 3D7) OX=36329 GN=PF3D7_1148900 PE=4 SV=1	41.25	0.00361795	2	tr|Q8IHN5|Q8IHN5_PLAF7	1.7363e+06	1.06943e+06	1.13383e+06	1.81002e+06	1.29249e+06	1.54279e+06	1.13383e+06	1.54279e+06	0.280109	0.167142	0.444334	0	0	0.304873
tr|O96237|O96237_PLAF7	O96237	PF3D7_0215800	Origin recognition complex subunit 5 OS=Plasmodium falciparum (isolate 3D7) OX=36329 GN=PF3D7_0215800 PE=4 SV=1	38.02	0.0042343	1	tr|O96237|O96237_PLAF7	229068	200524	217196	177387	191328	219245	217196	191328	0.0665082	0.108754	-0.182948	0.166667	0.333333	0.305125
tr|Q8I3I0|Q8I3I0_PLAF7	Q8I3I0	PF3D7_0528700	Peptidyl-prolyl cis-trans isomerase OS=Plasmodium falciparum (isolate 3D7) OX=36329 GN=PF3D7_0528700 PE=3 SV=1	69.95	0.00084674	2	tr|Q8I3I0|Q8I3I0_PLAF7	2.63349e+06	2.36415e+06	2.38407e+06	2.72824e+06	2.53741e+06	2.73766e+06	2.38407e+06	2.72824e+06	0.0609951	0.0423562	0.194544	0	0	0.30535
tr|A0A144A026|A0A144A026_PLAF7	A0A144A026	PF3D7_1228600	Merozoite surface protein 9 OS=Plasmodium falciparum (isolate 3D7) OX=36329 GN=PF3D7_1228600 PE=4 SV=1	328.61	0	9	tr|A0A144A026|A0A144A026_PLAF7	7.99275e+06	1.30212e+07	9.87966e+06	7.97823e+06	9.5969e+06	8.43939e+06	9.87966e+06	8.43939e+06	0.246672	0.0961683	-0.227323	0.0333333	0	0.306405
tr|Q8I476|Q8I476_PLAF7	Q8I476	PF3D7_0502400	Merozoite surface protein 8 OS=Plasmodium falciparum (isolate 3D7) OX=36329 GN=PF3D7_0502400 PE=4 SV=1	86.48	0	2	tr|Q8I476|Q8I476_PLAF7	511938	634074	449288	1.33901e+06	665371	429564	511938	665371	0.176723	0.581724	0.378189	0	0	0.306556
tr|Q8IIE9|Q8IIE9_PLAF7	Q8IIE9	PF3D7_1121700	Protein GCN20 OS=Plasmodium falciparum (isolate 3D7) OX=36329 GN=PF3D7_1121700 PE=4 SV=1	57.7	0.000805802	3	tr|Q8IIE9|Q8IIE9_PLAF7	1.44315e+06	1.5328e+06	1.22189e+06	1.08527e+06	1.30005e+06	1.36429e+06	1.44315e+06	1.30005e+06	0.114364	0.116907	-0.150654	0	0.111111	0.307627
tr|Q9U0J0|Q9U0J0_PLAF7	Q9U0J0	PF3D7_0409600	Replication protein A1, large subunit OS=Plasmodium falciparum (isolate 3D7) OX=36329 GN=PF3D7_0409600 PE=4 SV=1	391.37	0	12	tr|Q9U0J0|Q9U0J0_PLAF7	6.27566e+06	4.45072e+06	4.63324e+06	4.05586e+06	4.27835e+06	4.99802e+06	4.63324e+06	4.27835e+06	0.196312	0.110813	-0.114965	0.0222222	0.0444444	0.308987
tr|Q8IK12|Q8IK12_PLAF7	Q8IK12	PF3D7_1002400.1	RNA-binding protein, putative OS=Plasmodium falciparum (isolate 3D7) OX=36329 GN=PF3D7_1002400.1 PE=4 SV=1	404.71	0	12	tr|Q8IK12|Q8IK12_PLAF7	6.20383e+07	5.73124e+07	5.37767e+07	5.31399e+07	5.41862e+07	5.20962e+07	5.73124e+07	5.31399e+07	0.0718266	0.0196651	-0.109054	0	0	0.309089
tr|O77361|O77361_PLAF7	O77361	PF3D7_0310400	Parasite-infected erythrocyte surface protein OS=Plasmodium falciparum (isolate 3D7) OX=36329 GN=PF3D7_0310400 PE=4 SV=1	571.99	0	14	tr|O77361|O77361_PLAF7	1.36548e+07	1.26168e+07	1.24923e+07	1.07933e+07	1.29882e+07	1.17405e+07	1.26168e+07	1.17405e+07	0.049398	0.0929728	-0.10385	0	0.0185185	0.309802
tr|Q8IK17|Q8IK17_PLAF7	Q8IK17	PF3D7_1001900	Uncharacterized protein OS=Plasmodium falciparum (isolate 3D7) OX=36329 GN=PF3D7_1001900 PE=4 SV=1	137.86	0	5	tr|Q8IK17|Q8IK17_PLAF7	1.25444e+07	1.01177e+07	8.40107e+06	1.40395e+07	1.17241e+07	1.01925e+07	1.01177e+07	1.17241e+07	0.201054	0.161594	0.212592	0	0	0.310005
tr|Q8IHP4|Q8IHP4_PLAF7	Q8IHP4	PF3D7_1147700	Mitochondrial ATP synthase delta subunit,putative OS=Plasmodium falciparum (isolate 3D7) OX=36329 GN=PF3D7_1147700 PE=4 SV=1	47.27	0.00150263	1	tr|Q8IHP4|Q8IHP4_PLAF7	267697	469062	581121	477548	555480	537585	469062	537585	0.361531	0.0779711	0.196712	0	0	0.310152
tr|C6KT32|C6KT32_PLAF7	C6KT32	PF3D7_0619200	Uncharacterized protein OS=Plasmodium falciparum (isolate 3D7) OX=36329 GN=PF3D7_0619200 PE=4 SV=1	38.66	0.00425532	1	tr|C6KT32|C6KT32_PLAF7	791.726	22890.3	28659.9	19942.9	21897.5	27676.2	22890.3	21897.5	0.843098	0.173532	-0.0639712	0	0	0.310317
tr|Q8IDH3|Q8IDH3_PLAF7	Q8IDH3	PF3D7_1352700	p-loop containing nucleoside triphosphate hydrolase, putative OS=Plasmodium falciparum (isolate 3D7) OX=36329 GN=PF3D7_1352700 PE=4 SV=1	68.64	0.000839631	2	tr|Q8IDH3|Q8IDH3_PLAF7	1.1678e+06	917089	762699	1.04766e+06	1.18323e+06	999675	917089	1.04766e+06	0.215395	0.088404	0.192034	0	0	0.310818
tr|Q8I3M1|Q8I3M1_PLAF7	Q8I3M1	PF3D7_0524400	Ribosome-interacting GTPase 1, putative OS=Plasmodium falciparum (isolate 3D7) OX=36329 GN=PF3D7_0524400 PE=4 SV=1	536.18	0	11	tr|Q8I3M1|Q8I3M1_PLAF7	1.08684e+07	7.94757e+06	8.38676e+06	8.10116e+06	7.79134e+06	8.18797e+06	8.38676e+06	8.10116e+06	0.173688	0.0259758	-0.0499854	0.0416667	0.0416667	0.31161
tr|Q8ILE3|Q8ILE3_PLAF7	Q8ILE3	PF3D7_1432100	Voltage-dependent anion-selective channel protein, putative OS=Plasmodium falciparum (isolate 3D7) OX=36329 GN=PF3D7_1432100 PE=4 SV=1	466.19	0	13	tr|Q8ILE3|Q8ILE3_PLAF7	1.93717e+07	1.35829e+07	1.33555e+07	1.73584e+07	1.60841e+07	1.89472e+07	1.35829e+07	1.73584e+07	0.220885	0.0821403	0.353851	0	0	0.311664
tr|O97282|O97282_PLAF7	O97282	PF3D7_0320300	T-complex protein 1 subunit epsilon OS=Plasmodium falciparum (isolate 3D7) OX=36329 GN=PF3D7_0320300 PE=3 SV=1	2330.98	0	34	tr|O97282|O97282_PLAF7	1.12233e+08	8.79811e+07	9.4815e+07	8.75433e+07	8.26992e+07	9.51314e+07	9.4815e+07	8.75433e+07	0.127155	0.0708398	-0.115118	0.0333333	0.0466667	0.31179
tr|Q8ILA9|Q8ILA9_PLAF7	Q8ILA9	PF3D7_1435500	Clathrin light chain OS=Plasmodium falciparum (isolate 3D7) OX=36329 GN=PF3D7_1435500 PE=3 SV=1	163.81	0	2	tr|Q8ILA9|Q8ILA9_PLAF7	2.30239e+06	2.76993e+06	2.96964e+06	2.07498e+06	2.78665e+06	2.24525e+06	2.76993e+06	2.24525e+06	0.127755	0.156869	-0.302973	0	0.111111	0.311837
tr|Q8IDB0|Q8IDB0_PLAF7	Q8IDB0	PF3D7_1358800	40S ribosomal protein S15 OS=Plasmodium falciparum (isolate 3D7) OX=36329 GN=PF3D7_1358800 PE=1 SV=1	638.52	0	14	tr|Q8IDB0|Q8IDB0_PLAF7	2.87539e+08	2.26557e+08	2.40029e+08	2.46558e+08	2.20433e+08	2.10328e+08	2.40029e+08	2.20433e+08	0.127439	0.0828097	-0.122874	0	0	0.31184
tr|Q8IDZ0|Q8IDZ0_PLAF7	Q8IDZ0	PF3D7_1333800	Uncharacterized protein OS=Plasmodium falciparum (isolate 3D7) OX=36329 GN=PF3D7_1333800 PE=4 SV=1	133.82	0	4	tr|Q8IDZ0|Q8IDZ0_PLAF7	2.60776e+06	2.48896e+06	2.51227e+06	2.63429e+06	2.18115e+06	2.1497e+06	2.51227e+06	2.18115e+06	0.0248174	0.116791	-0.203898	0	0	0.312289
tr|Q8IKV6|Q8IKV6_PLAF7	Q8IKV6	PF3D7_1452000	Rhoptry neck protein 2 OS=Plasmodium falciparum (isolate 3D7) OX=36329 GN=PF3D7_1452000 PE=1 SV=1	69.32	0.00084246	2	tr|Q8IKV6|Q8IKV6_PLAF7	67028.1	58361.6	34947	386404	76360.2	34115.3	58361.6	76360.2	0.31052	1.16142	0.387802	0	0	0.31287
tr|Q8IB09|Q8IB09_PLAF7	Q8IB09	PF3D7_0817300	Asparagine-rich antigen OS=Plasmodium falciparum (isolate 3D7) OX=36329 GN=PF3D7_0817300 PE=4 SV=1	126.42	0	4	tr|Q8IB09|Q8IB09_PLAF7	443622	977948	688301	672932	950302	956730	688301	950302	0.380324	0.188407	0.465347	0	0	0.314061
tr|Q8I610|Q8I610_PLAF7	Q8I610	PF3D7_1203500	Threonylcarbamoyl-AMP synthase, putative OS=Plasmodium falciparum (isolate 3D7) OX=36329 GN=PF3D7_1203500 PE=4 SV=1	61.53	0.000820345	2	tr|Q8I610|Q8I610_PLAF7	381135	581521	522080	289756	494495	446803	522080	446803	0.207953	0.26106	-0.224631	0	0	0.31456
tr|Q8I542|Q8I542_PLAF7	Q8I542	PF3D7_1238100	Calcyclin binding protein, putative OS=Plasmodium falciparum (isolate 3D7) OX=36329 GN=PF3D7_1238100 PE=4 SV=2	718.99	0	10	tr|Q8I542|Q8I542_PLAF7	5.81035e+07	6.63616e+07	6.22814e+07	4.69053e+07	6.33063e+07	5.7945e+07	6.22814e+07	5.7945e+07	0.0663326	0.149195	-0.104115	0	0	0.314758
sp|Q8IED2|SMC2_PLAF7	Q8IED2	MAL13P1.96	Structural maintenance of chromosomes protein 2 OS=Plasmodium falciparum (isolate 3D7) OX=36329 GN=MAL13P1.96 PE=1 SV=1	141.4	0	4	sp|Q8IED2|SMC2_PLAF7	340450	682587	814307	699883	776074	733484	682587	733484	0.399366	0.0518463	0.103752	0	0	0.315223
tr|Q8IL32|Q8IL32_PLAF7	Q8IL32	PF3D7_1443900	Heat shock protein 90, putative OS=Plasmodium falciparum (isolate 3D7) OX=36329 GN=PF3D7_1443900 PE=1 SV=1	981.5	0	26	tr|Q8IL32|Q8IL32_PLAF7	2.9507e+07	2.73476e+07	2.74567e+07	2.91226e+07	3.05151e+07	3.128e+07	2.74567e+07	3.05151e+07	0.0432847	0.0360927	0.15237	0.0119048	0	0.316126
tr|C0H4C7|C0H4C7_PLAF7	C0H4C7	PF3D7_0505900	Uncharacterized protein OS=Plasmodium falciparum (isolate 3D7) OX=36329 GN=PF3D7_0505900 PE=4 SV=1	221.94	0	5	tr|C0H4C7|C0H4C7_PLAF7	5.68584e+06	6.51929e+06	6.50097e+06	4.86018e+06	6.11686e+06	5.9539e+06	6.50097e+06	5.9539e+06	0.0763379	0.121088	-0.126819	0	0.0555556	0.31742
tr|Q8IJV5|Q8IJV5_PLAF7	Q8IJV5	PF3D7_1009000	Diphthine methyl ester synthase, putative OS=Plasmodium falciparum (isolate 3D7) OX=36329 GN=PF3D7_1009000 PE=4 SV=1	59.35	0.00081367	1	tr|Q8IJV5|Q8IJV5_PLAF7	126724	146687	105384	125669	106994	100243	126724	106994	0.163588	0.11869	-0.244163	0	0	0.317675
tr|Q8I5S4|Q8I5S4_PLAF7	Q8I5S4	PF3D7_1212900	Bromodomain protein 2, putative OS=Plasmodium falciparum (isolate 3D7) OX=36329 GN=PF3D7_1212900 PE=4 SV=1	151.24	0	5	tr|Q8I5S4|Q8I5S4_PLAF7	1.23497e+06	1.65127e+06	1.74847e+06	1.56354e+06	1.81066e+06	1.84024e+06	1.65127e+06	1.81066e+06	0.176565	0.0874107	0.132939	0	0	0.318068
tr|Q8I205|Q8I205_PLAF7	Q8I205	PF3D7_0402100	PRESAN domain-containing protein OS=Plasmodium falciparum (isolate 3D7) OX=36329 GN=PF3D7_0402100 PE=4 SV=1	234.7	0	6	tr|Q8I205|Q8I205_PLAF7	4.77873e+06	4.19305e+06	3.68827e+06	4.79573e+06	4.6451e+06	4.44833e+06	4.19305e+06	4.6451e+06	0.12932	0.0376285	0.14771	0.047619	0	0.318551
tr|Q8IDJ8|Q8IDJ8_PLAF7	Q8IDJ8	PF3D7_1350100	Lysine--tRNA ligase OS=Plasmodium falciparum (isolate 3D7) OX=36329 GN=PF3D7_1350100 PE=1 SV=1	1806.15	0	40	tr|Q8IDJ8|Q8IDJ8_PLAF7	9.11972e+07	8.70711e+07	9.18216e+07	8.09581e+07	7.62133e+07	9.1473e+07	9.11972e+07	8.09581e+07	0.0286727	0.0942251	-0.171813	0.0175439	0.0292398	0.318904
tr|Q8IBR1|Q8IBR1_PLAF7	Q8IBR1	PF3D7_0719000	Uncharacterized protein OS=Plasmodium falciparum (isolate 3D7) OX=36329 GN=PF3D7_0719000 PE=4 SV=1	47.94	0.00150602	2	tr|Q8IBR1|Q8IBR1_PLAF7	228088	339662	218996	295708	198381	145017	228088	198381	0.25623	0.358658	-0.201315	0	0	0.319457
tr|Q8IJB3|Q8IJB3_PLAF7	Q8IJB3	PF3D7_1029200	WD repeat-containing protein, putative OS=Plasmodium falciparum (isolate 3D7) OX=36329 GN=PF3D7_1029200 PE=4 SV=1	43.85	0.00221076	1	tr|Q8IJB3|Q8IJB3_PLAF7	24041.6	47643.4	55161.5	40683.4	59140	56919.4	47643.4	56919.4	0.384036	0.192856	0.256643	0	0	0.319529
tr|C0H4T9|C0H4T9_PLAF7	C0H4T9	PF3D7_0811300	CCR4-associated factor 1 OS=Plasmodium falciparum (isolate 3D7) OX=36329 GN=PF3D7_0811300 PE=4 SV=1	109.46	0	3	tr|C0H4T9|C0H4T9_PLAF7	1.80467e+06	1.05143e+06	807803	679323	1.03419e+06	1.02756e+06	1.05143e+06	1.02756e+06	0.42552	0.222172	-0.0331277	0	0	0.320065
tr|Q8IE10|Q8IE10_PLAF7	Q8IE10	PF3D7_1331700	Glutamine--tRNA ligase, putative OS=Plasmodium falciparum (isolate 3D7) OX=36329 GN=PF3D7_1331700 PE=3 SV=1	588.33	0	17	tr|Q8IE10|Q8IE10_PLAF7	1.99916e+07	2.37757e+07	2.35254e+07	1.96175e+07	2.09235e+07	2.09711e+07	2.35254e+07	2.09235e+07	0.0943421	0.037464	-0.169097	0	0	0.320171
tr|Q8I5R9|Q8I5R9_PLAF7	Q8I5R9	PF3D7_1213600	Dynein light chain OS=Plasmodium falciparum (isolate 3D7) OX=36329 GN=PF3D7_1213600 PE=1 SV=1	161.38	0	2	tr|Q8I5R9|Q8I5R9_PLAF7	3.03095e+06	6.08868e+06	3.7922e+06	7.27116e+06	5.23783e+06	3.88986e+06	3.7922e+06	5.23783e+06	0.369847	0.311397	0.465935	0.0833333	0	0.320778
tr|Q8IJA0|Q8IJA0_PLAF7	Q8IJA0	PF3D7_1030500	26S proteasome regulatory subunit RPN9,putative OS=Plasmodium falciparum (isolate 3D7) OX=36329 GN=PF3D7_1030500 PE=4 SV=1	206.96	0	8	tr|Q8IJA0|Q8IJA0_PLAF7	1.50809e+07	1.91344e+07	1.9585e+07	1.60598e+07	1.49234e+07	1.71275e+07	1.91344e+07	1.60598e+07	0.138325	0.0687307	-0.252713	0	0	0.321209
tr|Q8I426|Q8I426_PLAF7	Q8I426	PF3D7_0507700	Nuclear protein localization protein 4,putative OS=Plasmodium falciparum (isolate 3D7) OX=36329 GN=PF3D7_0507700 PE=4 SV=1	252.07	0	8	tr|Q8I426|Q8I426_PLAF7	3.04077e+06	5.43056e+06	5.66946e+06	4.73773e+06	5.7363e+06	6.33529e+06	5.43056e+06	5.7363e+06	0.30839	0.144039	0.0790214	0.0740741	0	0.32199
tr|C0H5F2|C0H5F2_PLAF7	C0H5F2	PF3D7_1333400	AMMECR1 domain-containing protein OS=Plasmodium falciparum (isolate 3D7) OX=36329 GN=PF3D7_1333400 PE=4 SV=1	271.91	0	9	tr|C0H5F2|C0H5F2_PLAF7	9.46163e+06	6.69906e+06	6.41026e+06	5.64367e+06	6.13981e+06	7.51997e+06	6.69906e+06	6.13981e+06	0.2239	0.151098	-0.125764	0	0	0.322043
tr|Q8I3A3|Q8I3A3_PLAF7	Q8I3A3	PF3D7_0904600	Ubiquitin specific protease, putative OS=Plasmodium falciparum (isolate 3D7) OX=36329 GN=PF3D7_0904600 PE=3 SV=1	60.07	0.000816993	3	tr|Q8I3A3|Q8I3A3_PLAF7	204314	412312	332869	161418	338329	228592	332869	228592	0.331632	0.367842	-0.542176	0.166667	0	0.322213
tr|A0A144A1B3|A0A144A1B3_PLAF7	A0A144A1B3	PF3D7_1416100	Protein SEY1 homolog OS=Plasmodium falciparum (isolate 3D7) OX=36329 GN=PF3D7_1416100 PE=3 SV=1	619.69	0	22	tr|A0A144A1B3|A0A144A1B3_PLAF7	1.22423e+07	1.07617e+07	9.56794e+06	1.32901e+07	1.14653e+07	1.12845e+07	1.07617e+07	1.14653e+07	0.123394	0.0923484	0.0913687	0.0138889	0.0277778	0.322277
tr|Q8I1Q2|Q8I1Q2_PLAF7	Q8I1Q2	PF3D7_0418500	Trafficking protein particle complex subunit OS=Plasmodium falciparum (isolate 3D7) OX=36329 GN=PF3D7_0418500 PE=3 SV=1	59.61	0.000814996	1	tr|Q8I1Q2|Q8I1Q2_PLAF7	137508	112575	118715	193542	141846	110213	118715	141846	0.105672	0.2832	0.256827	0.166667	0	0.323553
tr|C6KSX9|C6KSX9_PLAF7	C6KSX9	PF3D7_0613700	Syntaxin binding protein, putative OS=Plasmodium falciparum (isolate 3D7) OX=36329 GN=PF3D7_0613700 PE=3 SV=1	66.3	0.000835422	1	tr|C6KSX9|C6KSX9_PLAF7	439147	439948	492730	501816	463593	524241	439948	501816	0.067153	0.061756	0.189824	0	0	0.323557
tr|Q8ILJ7|Q8ILJ7_PLAF7	Q8ILJ7	PF3D7_1426700	Phosphoenolpyruvate carboxylase OS=Plasmodium falciparum (isolate 3D7) OX=36329 GN=PF3D7_1426700 PE=4 SV=1	160.96	0	5	tr|Q8ILJ7|Q8ILJ7_PLAF7	764869	905022	1.03015e+06	892777	1.00876e+06	1.12456e+06	905022	1.00876e+06	0.147453	0.114893	0.156555	0.0555556	0.0555556	0.324977
tr|O77327|O77327_PLAF7	O77327	PF3D7_0308900	Splicing factor 3B subunit 1, putative OS=Plasmodium falciparum (isolate 3D7) OX=36329 GN=PF3D7_0308900 PE=4 SV=1	244.83	0	9	tr|O77327|O77327_PLAF7	1.97342e+06	1.94391e+06	1.83206e+06	2.03207e+06	2.18572e+06	1.98508e+06	1.94391e+06	2.03207e+06	0.0389116	0.0507531	0.0639918	0.0666667	0.0333333	0.32549
tr|Q8IL46|Q8IL46_PLAF7	Q8IL46	PF3D7_1442500	Protein prenyltransferase alpha subunit,putative OS=Plasmodium falciparum (isolate 3D7) OX=36329 GN=PF3D7_1442500 PE=4 SV=2	37.81	0.00422535	2	tr|Q8IL46|Q8IL46_PLAF7	63066.7	228365	201523	200601	191438	225200	201523	200601	0.539852	0.0848563	-0.00661431	0	0	0.326415
tr|Q7K6A5|Q7K6A5_PLAF7	Q7K6A5	PF3D7_0523000	Multidrug resistance protein 1 OS=Plasmodium falciparum (isolate 3D7) OX=36329 GN=PF3D7_0523000 PE=4 SV=1	2491.89	0	49	tr|Q7K6A5|Q7K6A5_PLAF7	1.51287e+08	1.19023e+08	1.23173e+08	1.58705e+08	1.34884e+08	1.41019e+08	1.23173e+08	1.41019e+08	0.133822	0.0853772	0.195198	0.0187793	0.00938967	0.328373
tr|Q8I427|Q8I427_PLAF7	Q8I427	PF3D7_0507600	Cell differentiation protein, putative OS=Plasmodium falciparum (isolate 3D7) OX=36329 GN=PF3D7_0507600 PE=4 SV=1	176.31	0	5	tr|Q8I427|Q8I427_PLAF7	1.05216e+06	519793	478519	555344	527545	444410	519793	527545	0.468101	0.113379	0.021356	0	0	0.329892
tr|Q8IKV7|Q8IKV7_PLAF7	Q8IKV7	PF3D7_1451900	Ribosome biogenesis protein TSR1, putative OS=Plasmodium falciparum (isolate 3D7) OX=36329 GN=PF3D7_1451900 PE=4 SV=1	247.33	0	7	tr|Q8IKV7|Q8IKV7_PLAF7	1.40415e+06	1.79865e+06	2.31255e+06	2.06514e+06	2.00854e+06	2.15556e+06	1.79865e+06	2.06514e+06	0.247766	0.035715	0.19933	0.0416667	0	0.330974
tr|Q8I6Z2|Q8I6Z2_PLAF7	Q8I6Z2	PF3D7_0729500	mRNA (N6-adenosine)-methyltransferase, putative OS=Plasmodium falciparum (isolate 3D7) OX=36329 GN=PF3D7_0729500 PE=3 SV=1	104.6	0	2	tr|Q8I6Z2|Q8I6Z2_PLAF7	989684	668055	586701	690552	727337	391753	668055	690552	0.284831	0.305118	0.0477839	0.111111	0	0.332954
tr|Q8I5I0|Q8I5I0_PLAF7	Q8I5I0	PF3D7_1223700	Iron transporter, putative OS=Plasmodium falciparum (isolate 3D7) OX=36329 GN=PF3D7_1223700 PE=4 SV=1	79.03	0	4	tr|Q8I5I0|Q8I5I0_PLAF7	2.56791e+06	2.54697e+06	2.69893e+06	2.89289e+06	2.87179e+06	2.64674e+06	2.56791e+06	2.87179e+06	0.0316198	0.0486584	0.161352	0	0	0.333207
tr|Q8IEQ1|Q8IEQ1_PLAF7	Q8IEQ1	PF3D7_1306400	26S protease regulatory subunit 10B, putative OS=Plasmodium falciparum (isolate 3D7) OX=36329 GN=PF3D7_1306400 PE=3 SV=1	785.17	0	15	tr|Q8IEQ1|Q8IEQ1_PLAF7	2.39895e+07	2.01002e+07	2.05622e+07	2.08517e+07	1.93099e+07	1.90421e+07	2.05622e+07	1.93099e+07	0.0985919	0.0494909	-0.0906543	0	0	0.333696
tr|Q8IDR8|Q8IDR8_PLAF7	Q8IDR8	PF3D7_1342100	Aconitate hydratase OS=Plasmodium falciparum (isolate 3D7) OX=36329 GN=PF3D7_1342100 PE=3 SV=1	299.31	0	7	tr|Q8IDR8|Q8IDR8_PLAF7	1.30601e+06	1.28059e+06	1.26038e+06	1.97822e+06	1.41798e+06	1.16907e+06	1.28059e+06	1.41798e+06	0.0178323	0.272341	0.147033	0.0416667	0	0.334201
sp|P61074|PCNA_PLAF7	P61074	PCNA	Proliferating cell nuclear antigen OS=Plasmodium falciparum (isolate 3D7) OX=36329 GN=PCNA PE=3 SV=1	1023.03	0	19	sp|P61074|PCNA_PLAF7	1.03499e+08	9.45983e+07	9.83834e+07	8.42997e+07	9.42877e+07	9.57469e+07	9.83834e+07	9.42877e+07	0.0452013	0.068136	-0.0613443	0.0533333	0.0266667	0.334218
tr|Q8ILV6|Q8ILV6_PLAF7	Q8ILV6	PF3D7_1413900	DnaJ protein, putative OS=Plasmodium falciparum (isolate 3D7) OX=36329 GN=PF3D7_1413900 PE=4 SV=1	111.62	0	4	tr|Q8ILV6|Q8ILV6_PLAF7	1.25482e+06	970208	1.2106e+06	1.64336e+06	1.13311e+06	1.19589e+06	1.2106e+06	1.19589e+06	0.133741	0.210138	-0.0176328	0	0	0.334563
tr|Q7K6A9|Q7K6A9_PLAF7	Q7K6A9	PF3D7_0803800	Proteasome subunit beta OS=Plasmodium falciparum (isolate 3D7) OX=36329 GN=PF3D7_0803800 PE=1 SV=1	755.29	0	11	tr|Q7K6A9|Q7K6A9_PLAF7	3.35275e+07	3.07649e+07	3.21447e+07	2.22855e+07	3.08359e+07	3.31262e+07	3.21447e+07	3.08359e+07	0.0429692	0.19874	-0.0599729	0.0555556	0	0.334633
tr|Q8IL21|Q8IL21_PLAF7	Q8IL21	PF3D7_1445200	ATP-dependent RNA helicase MAK5, putative OS=Plasmodium falciparum (isolate 3D7) OX=36329 GN=PF3D7_1445200 PE=4 SV=1	173.74	0	5	tr|Q8IL21|Q8IL21_PLAF7	1.75713e+06	1.4975e+06	1.20277e+06	1.71583e+06	1.56999e+06	1.66984e+06	1.4975e+06	1.66984e+06	0.186677	0.0451361	0.157156	0.0666667	0	0.334689
tr|Q8II22|Q8II22_PLAF7	Q8II22	PF3D7_1134200	Uncharacterized protein OS=Plasmodium falciparum (isolate 3D7) OX=36329 GN=PF3D7_1134200 PE=4 SV=1	44.6	0.00221729	2	tr|Q8II22|Q8II22_PLAF7	243800	153605	182879	213222	215064	222436	182879	215064	0.237885	0.0224783	0.233876	0	0	0.336145
tr|Q8I350|Q8I350_PLAF7	Q8I350	PF3D7_0910200	Uncharacterized protein OS=Plasmodium falciparum (isolate 3D7) OX=36329 GN=PF3D7_0910200 PE=4 SV=1	42.81	0.00292398	1	tr|Q8I350|Q8I350_PLAF7	254614	106248	84517.9	91762.3	89096.7	113789	106248	91762.3	0.623548	0.137985	-0.211465	0	0	0.336305
tr|C6KTA3|C6KTA3_PLAF7	C6KTA3	PF3D7_0626700	Uncharacterized protein OS=Plasmodium falciparum (isolate 3D7) OX=36329 GN=PF3D7_0626700 PE=4 SV=1	737.62	0	16	tr|C6KTA3|C6KTA3_PLAF7	8.21042e+07	6.01155e+07	6.26625e+07	5.59382e+07	5.70453e+07	6.79262e+07	6.26625e+07	5.70453e+07	0.176114	0.109859	-0.135494	0.031746	0.015873	0.336667
tr|Q8I527|Q8I527_PLAF7	Q8I527	PF3D7_1239600	Hydroxyethylthiazole kinase OS=Plasmodium falciparum (isolate 3D7) OX=36329 GN=PF3D7_1239600 PE=4 SV=1	203.08	0	4	tr|Q8I527|Q8I527_PLAF7	3.97502e+06	3.14035e+06	3.11636e+06	4.06487e+06	3.62553e+06	3.57371e+06	3.14035e+06	3.62553e+06	0.143369	0.0718721	0.207264	0	0	0.337302
tr|Q8IIB4|Q8IIB4_PLAF7	Q8IIB4	PF3D7_1124900	60S ribosomal protein L35, putative OS=Plasmodium falciparum (isolate 3D7) OX=36329 GN=PF3D7_1124900 PE=1 SV=2	354.77	0	9	tr|Q8IIB4|Q8IIB4_PLAF7	7.37677e+07	5.21253e+07	5.33865e+07	5.44407e+07	5.17371e+07	5.13357e+07	5.33865e+07	5.17371e+07	0.203273	0.0321646	-0.045276	0.025641	0	0.337513
tr|Q8I450|Q8I450_PLAF7	Q8I450	PF3D7_0505200	Actin-like protein, putative OS=Plasmodium falciparum (isolate 3D7) OX=36329 GN=PF3D7_0505200 PE=3 SV=1	131.11	0	5	tr|Q8I450|Q8I450_PLAF7	693026	785266	936226	786012	930480	980716	785266	930480	0.152547	0.112429	0.244794	0	0	0.338705
tr|Q8IAY9|Q8IAY9_PLAF7	Q8IAY9	PF3D7_0815200	Importin beta, putative OS=Plasmodium falciparum (isolate 3D7) OX=36329 GN=PF3D7_0815200 PE=4 SV=1	649.09	0	15	tr|Q8IAY9|Q8IAY9_PLAF7	2.03344e+07	1.56306e+07	1.6094e+07	1.64717e+07	1.42431e+07	1.59902e+07	1.6094e+07	1.59902e+07	0.149388	0.0753245	-0.00933285	0.0185185	0	0.339947
tr|Q8I1T3|Q8I1T3_PLAF7	Q8I1T3	PF3D7_0415400	Coatomer subunit zeta, putative OS=Plasmodium falciparum (isolate 3D7) OX=36329 GN=PF3D7_0415400 PE=4 SV=1	57.05	0.000802568	2	tr|Q8I1T3|Q8I1T3_PLAF7	3.28361e+06	2.88441e+06	2.70465e+06	1.8082e+06	2.8092e+06	3.10595e+06	2.88441e+06	2.8092e+06	0.100194	0.264125	-0.0381194	0	0	0.340802
tr|Q8IJX5|Q8IJX5_PLAF7	Q8IJX5	PF3D7_1006600	Phosducin-like protein, putative OS=Plasmodium falciparum (isolate 3D7) OX=36329 GN=PF3D7_1006600 PE=4 SV=1	69.61	0.000843882	3	tr|Q8IJX5|Q8IJX5_PLAF7	2.13844e+06	848798	925369	857842	905589	996118	925369	905589	0.554734	0.0763518	-0.0311727	0	0	0.341195
tr|Q8IJC6|Q8IJC6_PLAF7	Q8IJC6	PF3D7_1027800	60S ribosomal protein L3 OS=Plasmodium falciparum (isolate 3D7) OX=36329 GN=PF3D7_1027800 PE=1 SV=1	1784.51	0	34	tr|Q8IJC6|Q8IJC6_PLAF7	4.39012e+08	3.01791e+08	3.36442e+08	3.31325e+08	3.08137e+08	3.08253e+08	3.36442e+08	3.08253e+08	0.19872	0.0422736	-0.126244	0.0347222	0.0347222	0.341612
tr|Q8IIE1|Q8IIE1_PLAF7	Q8IIE1	PF3D7_1122500	Uncharacterized protein OS=Plasmodium falciparum (isolate 3D7) OX=36329 GN=PF3D7_1122500 PE=4 SV=1	42.86	0.00292612	1	tr|Q8IIE1|Q8IIE1_PLAF7	565569	85214.6	76161	61818.9	70951.6	142955	85214.6	70951.6	1.15545	0.483553	-0.264264	0.333333	0	0.342505
tr|A0A143ZZG2|A0A143ZZG2_PLAF7	A0A143ZZG2	PF3D7_1026800	40S ribosomal protein SA OS=Plasmodium falciparum (isolate 3D7) OX=36329 GN=PF3D7_1026800 PE=3 SV=1	816.83	0	14	tr|A0A143ZZG2|A0A143ZZG2_PLAF7	2.82226e+08	2.01311e+08	2.29679e+08	2.04335e+08	2.00457e+08	2.28527e+08	2.29679e+08	2.04335e+08	0.172692	0.0720513	-0.16868	0.015873	0	0.342538
tr|A0A143ZXT2|A0A143ZXT2_PLAF7	A0A143ZXT2	PF3D7_1027700.2	Centrin-3 OS=Plasmodium falciparum (isolate 3D7) OX=36329 GN=PF3D7_1027700.2 PE=4 SV=1	245.75	0	9	tr|A0A143ZXT2|A0A143ZXT2_PLAF7	4.21629e+06	5.35199e+06	4.25592e+06	4.29277e+06	4.58372e+06	3.41693e+06	4.25592e+06	4.29277e+06	0.139877	0.148211	0.0124377	0	0	0.342634
tr|Q8I717|Q8I717_PLAF7	Q8I717	PF3D7_1471000	RNA 3'-terminal phosphate cyclase-like protein,putative OS=Plasmodium falciparum (isolate 3D7) OX=36329 GN=PF3D7_1471000 PE=4 SV=1	63.97	0.000829187	2	tr|Q8I717|Q8I717_PLAF7	419320	276232	360812	525850	300612	462034	360812	462034	0.204301	0.270292	0.35675	0	0	0.343056
tr|Q8I5U8|Q8I5U8_PLAF7	Q8I5U8	PF3D7_1210100	Syntaxin, Qa-SNARE family OS=Plasmodium falciparum (isolate 3D7) OX=36329 GN=PF3D7_1210100 PE=4 SV=1	38.59	0.00424929	1	tr|Q8I5U8|Q8I5U8_PLAF7	15155.3	87094.5	260933	95183.3	224112	141461	87094.5	141461	1.04378	0.42526	0.69975	0	0	0.343998
tr|Q8IES4|Q8IES4_PLAF7	Q8IES4	PF3D7_1304100	DNA ligase OS=Plasmodium falciparum (isolate 3D7) OX=36329 GN=PF3D7_1304100 PE=3 SV=1	122.54	0	5	tr|Q8IES4|Q8IES4_PLAF7	1.10758e+06	1.44637e+06	1.46094e+06	1.17768e+06	1.29296e+06	1.11761e+06	1.44637e+06	1.17768e+06	0.149401	0.0745053	-0.29649	0	0	0.344059
tr|Q8I2W3|Q8I2W3_PLAF7	Q8I2W3	PF3D7_0919000	Nucleosome assembly protein OS=Plasmodium falciparum (isolate 3D7) OX=36329 GN=PF3D7_0919000 PE=3 SV=1	1388.01	0	26	tr|Q8I2W3|Q8I2W3_PLAF7	2.34632e+08	1.77721e+08	1.81564e+08	1.86203e+08	1.68776e+08	1.77437e+08	1.81564e+08	1.77437e+08	0.16066	0.0490982	-0.0331703	0.0650407	0.0243902	0.344255
tr|Q8IHY0|Q8IHY0_PLAF7	Q8IHY0	PF3D7_1138500	Protein phosphatase PPM2 OS=Plasmodium falciparum (isolate 3D7) OX=36329 GN=PF3D7_1138500 PE=3 SV=2	554.8	0	13	tr|Q8IHY0|Q8IHY0_PLAF7	1.03931e+07	1.1366e+07	1.21006e+07	9.59867e+06	1.11941e+07	1.03495e+07	1.1366e+07	1.03495e+07	0.0758908	0.0768898	-0.135166	0	0	0.345029
tr|Q8I5E1|Q8I5E1_PLAF7	Q8I5E1	PF3D7_1227700	Uncharacterized protein OS=Plasmodium falciparum (isolate 3D7) OX=36329 GN=PF3D7_1227700 PE=4 SV=1	139.08	0	6	tr|Q8I5E1|Q8I5E1_PLAF7	1.77003e+06	1.32487e+06	1.38896e+06	1.8074e+06	1.74144e+06	1.45573e+06	1.38896e+06	1.74144e+06	0.161013	0.112054	0.32627	0	0	0.345081
tr|Q8I415|Q8I415_PLAF7	Q8I415	PF3D7_0508800	Single-stranded DNA-binding protein OS=Plasmodium falciparum (isolate 3D7) OX=36329 GN=PF3D7_0508800 PE=1 SV=1	129.64	0	3	tr|Q8I415|Q8I415_PLAF7	762011	1.12348e+06	863936	986639	1.15538e+06	946641	863936	986639	0.203361	0.107609	0.191597	0	0	0.345379
tr|Q8IBY8|Q8IBY8_PLAF7	Q8IBY8	PF3D7_0710200	Uncharacterized protein OS=Plasmodium falciparum (isolate 3D7) OX=36329 GN=PF3D7_0710200 PE=4 SV=1	297.25	0	6	tr|Q8IBY8|Q8IBY8_PLAF7	3.09691e+06	2.14692e+06	1.74303e+06	1.56691e+06	2.21174e+06	1.97531e+06	2.14692e+06	1.97531e+06	0.298441	0.170081	-0.120193	0.111111	0	0.345811
tr|Q8I2X3|Q8I2X3_PLAF7	Q8I2X3	PF3D7_0918000	Glideosome-associated protein 50 OS=Plasmodium falciparum (isolate 3D7) OX=36329 GN=PF3D7_0918000 PE=1 SV=1	534.57	0	14	tr|Q8I2X3|Q8I2X3_PLAF7	2.73e+07	2.35157e+07	2.18073e+07	3.66822e+07	2.45311e+07	2.38931e+07	2.35157e+07	2.45311e+07	0.116118	0.254035	0.0609829	0	0	0.346641
tr|A0A144A6T9|A0A144A6T9_PLAF7	A0A144A6T9	PF3D7_1459700	NAD(P)H-hydrate epimerase OS=Plasmodium falciparum (isolate 3D7) OX=36329 GN=PF3D7_1459700 PE=3 SV=1	110.77	0	2	tr|A0A144A6T9|A0A144A6T9_PLAF7	190574	198202	280454	218526	230424	357591	198202	230424	0.223405	0.286722	0.217318	0.111111	0.333333	0.34695
tr|Q8I668|Q8I668_PLAF7	Q8I668	PF3D7_0203400	Uncharacterized protein OS=Plasmodium falciparum (isolate 3D7) OX=36329 GN=PF3D7_0203400 PE=4 SV=2	251.82	0	7	tr|Q8I668|Q8I668_PLAF7	1.95475e+07	3.91325e+07	3.52794e+07	1.73281e+07	3.02041e+07	2.55668e+07	3.52794e+07	2.55668e+07	0.331278	0.26764	-0.464554	0	0	0.34756
tr|Q8I291|Q8I291_PLAF7	Q8I291	PF3D7_0104800	Novel putative transporter 1 OS=Plasmodium falciparum (isolate 3D7) OX=36329 GN=PF3D7_0104800 PE=4 SV=1	72.73	0.000860585	3	tr|Q8I291|Q8I291_PLAF7	1.49983e+06	987077	1.06533e+06	1.5152e+06	1.23912e+06	1.26114e+06	1.06533e+06	1.26114e+06	0.233292	0.114629	0.243436	0	0	0.347927
sp|Q7K734|FEN1_PLAF7	Q7K734	FEN1	Flap endonuclease 1 OS=Plasmodium falciparum (isolate 3D7) OX=36329 GN=FEN1 PE=3 SV=1	180.43	0	6	sp|Q7K734|FEN1_PLAF7	4.86407e+06	3.88051e+06	3.87088e+06	4.33224e+06	4.81721e+06	4.63724e+06	3.88051e+06	4.63724e+06	0.135705	0.0533455	0.257018	0	0	0.348695
tr|Q8I3A1|Q8I3A1_PLAF7	Q8I3A1	PF3D7_0904800	Replication protein A1, small OS=Plasmodium falciparum (isolate 3D7) OX=36329 GN=PF3D7_0904800 PE=4 SV=1	456.89	0	15	tr|Q8I3A1|Q8I3A1_PLAF7	2.47432e+07	1.99482e+07	2.00085e+07	1.58949e+07	1.97362e+07	2.20912e+07	2.00085e+07	1.97362e+07	0.127565	0.162556	-0.0197665	0	0	0.349985
tr|Q8IKQ7|Q8IKQ7_PLAF7	Q8IKQ7	PF3D7_1457300	Uncharacterized protein OS=Plasmodium falciparum (isolate 3D7) OX=36329 GN=PF3D7_1457300 PE=4 SV=1	666.93	0	17	tr|Q8IKQ7|Q8IKQ7_PLAF7	3.0371e+07	2.3762e+07	2.32383e+07	2.03442e+07	2.32575e+07	2.5493e+07	2.3762e+07	2.32575e+07	0.154148	0.112099	-0.0309567	0.0151515	0	0.350054
tr|Q8I3N5|Q8I3N5_PLAF7	Q8I3N5	PF3D7_0522800	Pre-mRNA-splicing factor BUD31, putative OS=Plasmodium falciparum (isolate 3D7) OX=36329 GN=PF3D7_0522800 PE=4 SV=1	175.99	0	4	tr|Q8I3N5|Q8I3N5_PLAF7	1.06389e+06	1.59639e+06	1.66745e+06	1.67676e+06	1.48612e+06	1.72617e+06	1.59639e+06	1.67676e+06	0.228671	0.077781	0.0708591	0.166667	0.0833333	0.350503
tr|Q8I433|Q8I433_PLAF7	Q8I433	PF3D7_0506900	RHOMBOID-like protein OS=Plasmodium falciparum (isolate 3D7) OX=36329 GN=PF3D7_0506900 PE=3 SV=1	55.59	0.000794913	2	tr|Q8I433|Q8I433_PLAF7	498574	267376	363380	668621	366258	387906	363380	387906	0.308549	0.355643	0.0942264	0	0	0.352266
sp|Q8I1U7|SMC3_PLAF7	Q8I1U7	PFD0685c	Structural maintenance of chromosomes protein 3 homolog OS=Plasmodium falciparum (isolate 3D7) OX=36329 GN=PFD0685c PE=1 SV=1	423.63	0	14	sp|Q8I1U7|SMC3_PLAF7	5.85055e+06	5.95207e+06	5.58443e+06	5.66041e+06	5.40768e+06	5.15017e+06	5.85055e+06	5.40768e+06	0.0327594	0.047192	-0.113563	0.0238095	0.047619	0.352464
tr|Q8IDE7|Q8IDE7_PLAF7	Q8IDE7	PF3D7_1355500	Serine/threonine protein phosphatase 5 OS=Plasmodium falciparum (isolate 3D7) OX=36329 GN=PF3D7_1355500 PE=4 SV=1	216.01	0	10	tr|Q8IDE7|Q8IDE7_PLAF7	4.28591e+06	4.95242e+06	5.08171e+06	3.5576e+06	4.18387e+06	5.1201e+06	4.95242e+06	4.18387e+06	0.0894671	0.18342	-0.243298	0	0	0.353087
tr|Q8I5C7|Q8I5C7_PLAF7	Q8I5C7	PF3D7_1229100	Multidrug resistance-associated protein 2 OS=Plasmodium falciparum (isolate 3D7) OX=36329 GN=PF3D7_1229100 PE=4 SV=1	209.2	0	9	tr|Q8I5C7|Q8I5C7_PLAF7	2.80589e+06	1.87349e+06	1.71509e+06	2.30435e+06	2.41531e+06	2.46809e+06	1.87349e+06	2.41531e+06	0.276517	0.0348824	0.366481	0.111111	0.037037	0.353262
tr|Q8IDN6|Q8IDN6_PLAF7	Q8IDN6	PF3D7_1346100	Protein transport protein SEC61 subunit alpha OS=Plasmodium falciparum (isolate 3D7) OX=36329 GN=PF3D7_1346100 PE=3 SV=1	982.06	0	14	tr|Q8IDN6|Q8IDN6_PLAF7	2.77613e+07	2.10349e+07	2.26027e+07	2.16318e+07	2.27361e+07	1.99825e+07	2.26027e+07	2.16318e+07	0.147872	0.0646054	-0.0633438	0	0	0.353722
tr|C0H4A6|C0H4A6_PLAF7	C0H4A6	PF3D7_0415900	Ribosomal protein L15 OS=Plasmodium falciparum (isolate 3D7) OX=36329 GN=PF3D7_0415900 PE=1 SV=1	531.9	0	11	tr|C0H4A6|C0H4A6_PLAF7	8.08024e+07	5.22991e+07	5.47302e+07	5.62704e+07	5.16673e+07	5.36861e+07	5.47302e+07	5.36861e+07	0.252377	0.0428274	-0.0277887	0	0.0222222	0.35397
tr|Q8I3Y4|Q8I3Y4_PLAF7	Q8I3Y4	PF3D7_0512200	Glutathione synthetase OS=Plasmodium falciparum (isolate 3D7) OX=36329 GN=PF3D7_0512200 PE=3 SV=1	144.8	0	6	tr|Q8I3Y4|Q8I3Y4_PLAF7	3.51521e+06	5.6958e+06	4.98157e+06	5.21935e+06	5.09659e+06	5.63612e+06	4.98157e+06	5.21935e+06	0.23499	0.0531845	0.06727	0	0	0.35416
tr|Q8ILY9|Q8ILY9_PLAF7	Q8ILY9	PF3D7_1410600	Eukaryotic translation initiation factor 2 subunit gamma, putative OS=Plasmodium falciparum (isolate 3D7) OX=36329 GN=PF3D7_1410600 PE=4 SV=1	1355	0	24	tr|Q8ILY9|Q8ILY9_PLAF7	1.5169e+08	1.13792e+08	1.15163e+08	1.14601e+08	1.12776e+08	1.14053e+08	1.15163e+08	1.14053e+08	0.169415	0.00822699	-0.0139697	0.0701754	0.105263	0.35529
tr|Q8IHM9|Q8IHM9_PLAF7	Q8IHM9	PF3D7_1149400	Uncharacterized protein OS=Plasmodium falciparum (isolate 3D7) OX=36329 GN=PF3D7_1149400 PE=4 SV=2	362.55	0	6	tr|Q8IHM9|Q8IHM9_PLAF7	5.44819e+06	3.4999e+06	3.61956e+06	5.518e+06	4.14189e+06	4.71126e+06	3.61956e+06	4.71126e+06	0.260657	0.144343	0.380301	0	0	0.355447
tr|C6S3H2|C6S3H2_PLAF7	C6S3H2	PF3D7_1403100	Cnd1 domain-containing protein OS=Plasmodium falciparum (isolate 3D7) OX=36329 GN=PF3D7_1403100 PE=4 SV=1	38.6	0.0042523	1	tr|C6S3H2|C6S3H2_PLAF7	134012	126529	89008.1	208825	119085	111254	126529	119085	0.206966	0.370342	-0.0874835	0	0	0.357239
sp|C6KSQ6|RAD50_PLAF7	C6KSQ6	PFF0285c	Probable DNA repair protein RAD50 OS=Plasmodium falciparum (isolate 3D7) OX=36329 GN=PFF0285c PE=1 SV=1	105.31	0	2	sp|C6KSQ6|RAD50_PLAF7	300635	355600	292333	380010	345389	313478	300635	345389	0.10874	0.096089	0.20021	0	0	0.360725
tr|C0H4C6|C0H4C6_PLAF7	C0H4C6	PF3D7_0505000	Uncharacterized protein OS=Plasmodium falciparum (isolate 3D7) OX=36329 GN=PF3D7_0505000 PE=4 SV=1	32.89	0.00811908	1	tr|C0H4C6|C0H4C6_PLAF7	3945.75	20309.9	23846.8	14867.5	25029.7	21757.2	20309.9	21757.2	0.662161	0.252406	0.0993073	0	0	0.361419
tr|Q8IJJ6|Q8IJJ6_PLAF7	Q8IJJ6	PF3D7_1020600	Uncharacterized protein OS=Plasmodium falciparum (isolate 3D7) OX=36329 GN=PF3D7_1020600 PE=4 SV=2	43.33	0.00220103	1	tr|Q8IJJ6|Q8IJJ6_PLAF7	3.55628e+06	2.08669e+06	2.14265e+06	2.18562e+06	2.17381e+06	2.11846e+06	2.14265e+06	2.17381e+06	0.320893	0.016607	0.0208312	0	0	0.362726
tr|Q8IIS8|Q8IIS8_PLAF7	Q8IIS8	PF3D7_1107400	DNA repair protein RAD51 homolog OS=Plasmodium falciparum (isolate 3D7) OX=36329 GN=PF3D7_1107400 PE=3 SV=2	286.21	0	6	tr|Q8IIS8|Q8IIS8_PLAF7	2.84669e+06	2.96371e+06	3.34037e+06	3.1719e+06	3.20777e+06	3.49763e+06	2.96371e+06	3.20777e+06	0.0845723	0.0542484	0.114165	0	0	0.362798
tr|Q8IAZ5|Q8IAZ5_PLAF7	Q8IAZ5	PF3D7_0815800	Vacuolar protein sorting-associated protein 9,putative OS=Plasmodium falciparum (isolate 3D7) OX=36329 GN=PF3D7_0815800 PE=4 SV=1	90.57	0	3	tr|Q8IAZ5|Q8IAZ5_PLAF7	1.21345e+06	20494.7	9374.18	43446.5	29225.8	2973.16	20494.7	29225.8	1.66969	0.814295	0.511988	0.444444	0.333333	0.364082
tr|Q8IIC5|Q8IIC5_PLAF7	Q8IIC5	PF3D7_1123800	Structural maintenance of chromosomes protein 5,putative OS=Plasmodium falciparum (isolate 3D7) OX=36329 GN=PF3D7_1123800 PE=4 SV=1	48.21	0.0015083	1	tr|Q8IIC5|Q8IIC5_PLAF7	10840.5	59037.7	56149.7	66066	53285.3	40683.3	56149.7	53285.3	0.643465	0.237914	-0.0755416	0	0	0.364771
tr|A0A144A2R4|A0A144A2R4_PLAF7	A0A144A2R4	PF3D7_1455200.1	Methyltransferase, putative OS=Plasmodium falciparum (isolate 3D7) OX=36329 GN=PF3D7_1455200.1 PE=4 SV=1	131.55	0	4	tr|A0A144A2R4|A0A144A2R4_PLAF7	1.38889e+06	872822	1.00469e+06	799051	918179	1.07888e+06	1.00469e+06	918179	0.246252	0.150671	-0.129897	0	0	0.364995
tr|Q8I4U5|Q8I4U5_PLAF7	Q8I4U5	PF3D7_1248900	26S protease regulatory subunit 8, putative OS=Plasmodium falciparum (isolate 3D7) OX=36329 GN=PF3D7_1248900 PE=3 SV=1	1305.22	0	26	tr|Q8I4U5|Q8I4U5_PLAF7	4.53305e+07	4.27724e+07	4.58093e+07	3.99807e+07	4.24514e+07	4.27926e+07	4.53305e+07	4.24514e+07	0.0365782	0.0367616	-0.0946702	0.00925926	0.00925926	0.365386
tr|Q8IDA1|Q8IDA1_PLAF7	Q8IDA1	PF3D7_1360400	Uncharacterized protein OS=Plasmodium falciparum (isolate 3D7) OX=36329 GN=PF3D7_1360400 PE=4 SV=1	56.68	0.0008	1	tr|Q8IDA1|Q8IDA1_PLAF7	104995	193768	202858	199666	231494	161454	193768	199666	0.323362	0.177527	0.0432626	0	0	0.36685
tr|C0H595|C0H595_PLAF7	C0H595	PF3D7_1302300	Uncharacterized protein OS=Plasmodium falciparum (isolate 3D7) OX=36329 GN=PF3D7_1302300 PE=4 SV=1	39.52	0.00356633	1	tr|C0H595|C0H595_PLAF7	141036	121140	176216	113326	398639	169795	141036	169795	0.19085	0.664836	0.267727	0	0	0.367386
tr|C0H4E8|C0H4E8_PLAF7	C0H4E8	PF3D7_0518300	Proteasome subunit beta OS=Plasmodium falciparum (isolate 3D7) OX=36329 GN=PF3D7_0518300 PE=1 SV=1	355.12	0	10	tr|C0H4E8|C0H4E8_PLAF7	2.90278e+07	2.8241e+07	3.04669e+07	2.67509e+07	2.71043e+07	2.82694e+07	2.90278e+07	2.71043e+07	0.0385952	0.0290257	-0.0989153	0	0	0.36885
tr|Q8I2X0|Q8I2X0_PLAF7	Q8I2X0	PF3D7_0918300	Eukaryotic translation initiation factor 3 subunit F, putative OS=Plasmodium falciparum (isolate 3D7) OX=36329 GN=PF3D7_0918300 PE=3 SV=1	183.39	0	6	tr|Q8I2X0|Q8I2X0_PLAF7	1.77888e+07	1.25865e+07	1.28196e+07	1.1725e+07	1.31044e+07	1.33218e+07	1.28196e+07	1.31044e+07	0.204094	0.0681001	0.0317086	0.0555556	0	0.368884
tr|Q8I0U6|Q8I0U6_PLAF7	Q8I0U6	PF3D7_0102200	Ring-infected erythrocyte surface antigen OS=Plasmodium falciparum (isolate 3D7) OX=36329 GN=PF3D7_0102200 PE=4 SV=1	1107.3	0	29	tr|Q8I0U6|Q8I0U6_PLAF7	4.71178e+07	2.04091e+07	1.8614e+07	4.48641e+07	2.92821e+07	3.00871e+07	2.04091e+07	3.00871e+07	0.555963	0.252505	0.559933	0.0648148	0.0648148	0.3693
tr|Q8IB23|Q8IB23_PLAF7	Q8IB23	PF3D7_0818800	U3 small nucleolar ribonucleoprotein protein IMP4, putative OS=Plasmodium falciparum (isolate 3D7) OX=36329 GN=PF3D7_0818800 PE=4 SV=1	88.24	0	2	tr|Q8IB23|Q8IB23_PLAF7	533814	326404	330073	440849	425122	472622	330073	440849	0.299179	0.0542307	0.417502	0.111111	0	0.369501
tr|C6KSS2|C6KSS2_PLAF7	C6KSS2	PF3D7_0607400	G-protein associated signal transduction protein, putative OS=Plasmodium falciparum (isolate 3D7) OX=36329 GN=PF3D7_0607400 PE=4 SV=1	58.28	0.000809061	1	tr|C6KSS2|C6KSS2_PLAF7	31241.7	43094.9	30491.4	34938.3	42177.6	39434.2	31241.7	39434.2	0.202331	0.094075	0.335973	0	0.166667	0.369629
tr|Q8IB83|Q8IB83_PLAF7	Q8IB83	PF3D7_0824900	Uncharacterized protein OS=Plasmodium falciparum (isolate 3D7) OX=36329 GN=PF3D7_0824900 PE=4 SV=1	41.25	0.00361795	2	tr|Q8IB83|Q8IB83_PLAF7	222662	298697	194074	235119	338289	251831	222662	251831	0.226749	0.201305	0.177601	0	0	0.370734
tr|A0A143ZVU1|A0A143ZVU1_PLAF7	A0A143ZVU1	PF3D7_0923800.2	Thioredoxin reductase OS=Plasmodium falciparum (isolate 3D7) OX=36329 GN=PF3D7_0923800.2 PE=3 SV=1	506.52	0	10	tr|A0A143ZVU1|A0A143ZVU1_PLAF7	8.67813e+06	1.27517e+07	1.30227e+07	1.34071e+07	1.27323e+07	1.21851e+07	1.27517e+07	1.27323e+07	0.211935	0.0479167	-0.00219999	0	0	0.371521
tr|C6KT64|C6KT64_PLAF7	C6KT64	PF3D7_0622800	Leucine--tRNA ligase, putative OS=Plasmodium falciparum (isolate 3D7) OX=36329 GN=PF3D7_0622800 PE=1 SV=1	884.39	0	31	tr|C6KT64|C6KT64_PLAF7	2.09463e+07	2.33702e+07	2.35455e+07	1.97692e+07	2.00891e+07	2.29889e+07	2.33702e+07	2.00891e+07	0.064218	0.0846724	-0.218256	0.0392157	0.0588235	0.373844
tr|A0A144A659|A0A144A659_PLAF7	A0A144A659	PF3D7_1438700	DNA primase OS=Plasmodium falciparum (isolate 3D7) OX=36329 GN=PF3D7_1438700 PE=3 SV=1	291.98	0	9	tr|A0A144A659|A0A144A659_PLAF7	9.77631e+06	7.25916e+06	8.09395e+06	7.1361e+06	7.70993e+06	7.86706e+06	8.09395e+06	7.70993e+06	0.153064	0.0508212	-0.0701254	0.037037	0.111111	0.37403
tr|Q8I5A4|Q8I5A4_PLAF7	Q8I5A4	PF3D7_1231600	Pre-mRNA-splicing factor ATP-dependent RNA helicase PRP2, putative OS=Plasmodium falciparum (isolate 3D7) OX=36329 GN=PF3D7_1231600 PE=4 SV=1	143.32	0	4	tr|Q8I5A4|Q8I5A4_PLAF7	1.10077e+06	710720	701991	688755	742430	725001	710720	725001	0.271841	0.0380969	0.0287014	0.133333	0	0.376459
tr|Q8I526|Q8I526_PLAF7	Q8I526	PF3D7_1239700	ATP-dependent zinc metalloprotease FTSH 1 OS=Plasmodium falciparum (isolate 3D7) OX=36329 GN=PF3D7_1239700 PE=3 SV=1	876.5	0	21	tr|Q8I526|Q8I526_PLAF7	1.69561e+07	1.90211e+07	1.94693e+07	1.91626e+07	2.04254e+07	1.98464e+07	1.90211e+07	1.98464e+07	0.0725295	0.031905	0.0612726	0.0144928	0	0.376608
tr|Q8IKZ6|Q8IKZ6_PLAF7	Q8IKZ6	PF3D7_1447900	Multidrug resistance protein 2 OS=Plasmodium falciparum (isolate 3D7) OX=36329 GN=PF3D7_1447900 PE=4 SV=1	330.39	0	13	tr|Q8IKZ6|Q8IKZ6_PLAF7	1.48049e+07	1.16378e+07	1.1198e+07	1.32879e+07	1.28106e+07	1.53069e+07	1.16378e+07	1.32879e+07	0.156837	0.0960121	0.191295	0	0	0.377558
tr|Q8I5J0|Q8I5J0_PLAF7	Q8I5J0	PF3D7_1222500	Diphthine--ammonia ligase, putative OS=Plasmodium falciparum (isolate 3D7) OX=36329 GN=PF3D7_1222500 PE=4 SV=1	97.33	0	2	tr|Q8I5J0|Q8I5J0_PLAF7	1.01174e+06	562552	569450	776986	524487	419975	569450	524487	0.360169	0.31987	-0.118663	0	0	0.378149
tr|C0H570|C0H570_PLAF7	C0H570	PF3D7_0929200	RNA-binding protein, putative OS=Plasmodium falciparum (isolate 3D7) OX=36329 GN=PF3D7_0929200 PE=4 SV=1	571.35	0	10	tr|C0H570|C0H570_PLAF7	2.13734e+07	1.97184e+07	1.90692e+07	2.11177e+07	2.2172e+07	2.10173e+07	1.97184e+07	2.11177e+07	0.0592473	0.0298401	0.0989153	0	0	0.378344
tr|C6KSS8|C6KSS8_PLAF7	C6KSS8	PF3D7_0608000	Diphthine methyltransferase, putative OS=Plasmodium falciparum (isolate 3D7) OX=36329 GN=PF3D7_0608000 PE=4 SV=1	57.14	0.000803213	1	tr|C6KSS8|C6KSS8_PLAF7	13955.8	118340	184345	125191	118385	130622	118340	125191	0.81397	0.0491565	0.0811912	0	0	0.379353
tr|Q8IIA5|Q8IIA5_PLAF7	Q8IIA5	PF3D7_1125900	XRN2-binding (XTBD) domain-containing protein OS=Plasmodium falciparum (isolate 3D7) OX=36329 GN=PF3D7_1125900 PE=4 SV=1	53.14	0	1	tr|Q8IIA5|Q8IIA5_PLAF7	199317	39945.4	106480	222470	108344	118047	106480	118047	0.694562	0.422911	0.148776	0.333333	0.333333	0.380538
tr|Q8IIA4|Q8IIA4_PLAF7	Q8IIA4	PF3D7_1126000	Threonine--tRNA ligase OS=Plasmodium falciparum (isolate 3D7) OX=36329 GN=PF3D7_1126000 PE=3 SV=1	1138.38	0	28	tr|Q8IIA4|Q8IIA4_PLAF7	2.60935e+07	2.51456e+07	2.65897e+07	2.26867e+07	2.29627e+07	2.68007e+07	2.60935e+07	2.29627e+07	0.0282827	0.0952245	-0.184396	0.03125	0.03125	0.380665
tr|Q8ILP4|Q8ILP4_PLAF7	Q8ILP4	PF3D7_1420600	Pantothenate kinase, putative OS=Plasmodium falciparum (isolate 3D7) OX=36329 GN=PF3D7_1420600 PE=4 SV=2	214.23	0	5	tr|Q8ILP4|Q8ILP4_PLAF7	3.85821e+06	2.97166e+06	3.55906e+06	2.7247e+06	3.21152e+06	3.45283e+06	3.55906e+06	3.21152e+06	0.13024	0.118511	-0.14824	0.0555556	0.166667	0.381249
tr|A0A143ZYK6|A0A143ZYK6_PLAF7	A0A143ZYK6	PF3D7_1114100.2	RHOMBOID-like protein OS=Plasmodium falciparum (isolate 3D7) OX=36329 GN=PF3D7_1114100.2 PE=3 SV=1	70.42	0.000848176	2	tr|A0A143ZYK6|A0A143ZYK6_PLAF7	4.22106e+06	3.74442e+06	3.72586e+06	3.14655e+06	4.12927e+06	3.44386e+06	3.74442e+06	3.44386e+06	0.0720271	0.141041	-0.120716	0	0	0.381264
tr|Q8IB44|Q8IB44_PLAF7	Q8IB44	PF3D7_0821000	Uncharacterized protein OS=Plasmodium falciparum (isolate 3D7) OX=36329 GN=PF3D7_0821000 PE=4 SV=1	463.54	0	13	tr|Q8IB44|Q8IB44_PLAF7	1.36416e+07	1.35023e+07	1.37859e+07	1.66022e+07	1.38776e+07	1.38465e+07	1.36416e+07	1.38776e+07	0.0103938	0.107077	0.0247416	0.0588235	0.117647	0.381686
tr|Q8IDR9|Q8IDR9_PLAF7	Q8IDR9	PF3D7_1342000	40S ribosomal protein S6 OS=Plasmodium falciparum (isolate 3D7) OX=36329 GN=PF3D7_1342000 PE=1 SV=1	2009.25	0	25	tr|Q8IDR9|Q8IDR9_PLAF7	6.33139e+08	4.51409e+08	4.25648e+08	4.90309e+08	4.10241e+08	4.22793e+08	4.51409e+08	4.22793e+08	0.224662	0.0976246	-0.0944811	0.0188679	0.0440252	0.384149
tr|Q8I6V3|Q8I6V3_PLAF7	Q8I6V3	PF3D7_1408000	Plasmepsin II OS=Plasmodium falciparum (isolate 3D7) OX=36329 GN=PF3D7_1408000 PE=1 SV=1	913.6	0	17	tr|Q8I6V3|Q8I6V3_PLAF7	2.02461e+08	1.2468e+08	1.25117e+08	1.20699e+08	1.21296e+08	1.40961e+08	1.25117e+08	1.21296e+08	0.297051	0.0903224	-0.0447539	0.0133333	0	0.384363
tr|A0A143ZVA4|A0A143ZVA4_PLAF7	A0A143ZVA4	PF3D7_0529400.2	Uncharacterized protein OS=Plasmodium falciparum (isolate 3D7) OX=36329 GN=PF3D7_0529400.2 PE=4 SV=1	118.73	0	5	tr|A0A143ZVA4|A0A143ZVA4_PLAF7	1.03134e+06	1.19162e+06	1.05853e+06	693696	1.20351e+06	1.01817e+06	1.05853e+06	1.01817e+06	0.0784116	0.265543	-0.0560871	0.0666667	0	0.384728
tr|Q8I6T6|Q8I6T6_PLAF7	Q8I6T6	PF3D7_1311700	Cytochrome c2, putative OS=Plasmodium falciparum (isolate 3D7) OX=36329 GN=PF3D7_1311700 PE=3 SV=1	37.04	0.00491228	1	tr|Q8I6T6|Q8I6T6_PLAF7	213091	204197	266374	203700	252089	353023	213091	252089	0.147556	0.282588	0.242462	0	0	0.385863
tr|Q8I608|Q8I608_PLAF7	Q8I608	PF3D7_1203700	Nucleosome assembly protein OS=Plasmodium falciparum (isolate 3D7) OX=36329 GN=PF3D7_1203700 PE=1 SV=2	705.79	0	13	tr|Q8I608|Q8I608_PLAF7	1.49262e+08	1.18636e+08	1.06286e+08	1.16868e+08	1.01737e+08	1.16362e+08	1.18636e+08	1.16362e+08	0.177396	0.0769654	-0.0279192	0.0416667	0.0277778	0.38593
tr|A0A144A2H0|A0A144A2H0_PLAF7	A0A144A2H0	PF3D7_1454400	Aminopeptidase P OS=Plasmodium falciparum (isolate 3D7) OX=36329 GN=PF3D7_1454400 PE=3 SV=1	2016.54	0	44	tr|A0A144A2H0|A0A144A2H0_PLAF7	2.89824e+08	2.17847e+08	2.38981e+08	2.15392e+08	2.18625e+08	2.43189e+08	2.38981e+08	2.18625e+08	0.148649	0.0673428	-0.128435	0	0	0.38679
tr|Q8I0V9|Q8I0V9_PLAF7	Q8I0V9	PF3D7_0109200	Cleavage and polyadenylation specificity factor subunit 5 OS=Plasmodium falciparum (isolate 3D7) OX=36329 GN=PF3D7_0109200 PE=3 SV=1	173.73	0	4	tr|Q8I0V9|Q8I0V9_PLAF7	126265	478129	417692	345055	527836	383670	417692	383670	0.552236	0.23	-0.122575	0	0	0.38686
tr|Q8I3J5|Q8I3J5_PLAF7	Q8I3J5	PF3D7_0527000	DNA replication licensing factor MCM3, putative OS=Plasmodium falciparum (isolate 3D7) OX=36329 GN=PF3D7_0527000 PE=3 SV=1	1763.1	0	40	tr|Q8I3J5|Q8I3J5_PLAF7	6.0943e+07	6.63221e+07	7.0665e+07	5.28672e+07	6.52107e+07	6.42134e+07	6.63221e+07	6.42134e+07	0.0738167	0.112843	-0.0466155	0.00680272	0	0.387265
tr|Q8IL08|Q8IL08_PLAF7	Q8IL08	PF3D7_1446500	Uncharacterized protein OS=Plasmodium falciparum (isolate 3D7) OX=36329 GN=PF3D7_1446500 PE=4 SV=1	257.59	0	11	tr|Q8IL08|Q8IL08_PLAF7	1.26616e+06	2.17144e+06	1.86793e+06	1.69704e+06	2.23924e+06	2.11401e+06	1.86793e+06	2.11401e+06	0.260532	0.140761	0.178545	0.0909091	0.030303	0.388828
tr|Q8IM55|Q8IM55_PLAF7	Q8IM55	PF3D7_1403900	Serine/threonine protein phosphatase CPPED1,putative OS=Plasmodium falciparum (isolate 3D7) OX=36329 GN=PF3D7_1403900 PE=4 SV=2	147.37	0	6	tr|Q8IM55|Q8IM55_PLAF7	1.43595e+07	1.45499e+07	1.56588e+07	1.36792e+07	1.40828e+07	1.40534e+07	1.45499e+07	1.40534e+07	0.0472292	0.0161453	-0.0500891	0.111111	0.111111	0.38939
tr|O97306|O97306_PLAF7	O97306	PF3D7_0323800	Uncharacterized protein OS=Plasmodium falciparum (isolate 3D7) OX=36329 GN=PF3D7_0323800 PE=4 SV=3	74.36	0.000867303	2	tr|O97306|O97306_PLAF7	550370	1.05675e+06	907587	353633	853715	789097	907587	789097	0.310432	0.408718	-0.201833	0.166667	0	0.38962
tr|Q8I2V6|Q8I2V6_PLAF7	Q8I2V6	PF3D7_0919700	Pyridoxal phosphate homeostasis protein OS=Plasmodium falciparum (isolate 3D7) OX=36329 GN=PF3D7_0919700 PE=3 SV=1	412.04	0	10	tr|Q8I2V6|Q8I2V6_PLAF7	8.49919e+06	6.56256e+06	7.53564e+06	6.52435e+06	6.07453e+06	7.85669e+06	7.53564e+06	6.52435e+06	0.128553	0.135921	-0.207895	0.025641	0.102564	0.38966
tr|Q8IFP2|Q8IFP2_PLAF7	Q8IFP2	PF3D7_0422400	40S ribosomal protein S19 OS=Plasmodium falciparum (isolate 3D7) OX=36329 GN=PF3D7_0422400 PE=1 SV=1	1683.26	0	19	tr|Q8IFP2|Q8IFP2_PLAF7	5.26762e+08	4.16857e+08	4.10675e+08	4.37099e+08	3.90737e+08	4.05323e+08	4.16857e+08	4.05323e+08	0.144676	0.0576708	-0.0404794	0.020202	0	0.390805
tr|O77321|O77321_PLAF7	O77321	PF3D7_0308000	DNA polymerase delta small subunit, putative OS=Plasmodium falciparum (isolate 3D7) OX=36329 GN=PF3D7_0308000 PE=4 SV=1	39.53	0.00357143	2	tr|O77321|O77321_PLAF7	2.16195e+06	149410	179665	217747	215438	175753	179665	215438	1.38895	0.116302	0.261968	0.333333	0.333333	0.391206
tr|Q8IM69|Q8IM69_PLAF7	Q8IM69	PF3D7_1402000	Uncharacterized protein OS=Plasmodium falciparum (isolate 3D7) OX=36329 GN=PF3D7_1402000 PE=4 SV=2	55.38	0.000794281	1	tr|Q8IM69|Q8IM69_PLAF7	110488	362023	437222	341628	316256	444056	362023	341628	0.564276	0.184205	-0.083655	0	0	0.391895
sp|Q76NM6|VATA_PLAF7	Q76NM6	vapA	V-type proton ATPase catalytic subunit A OS=Plasmodium falciparum (isolate 3D7) OX=36329 GN=vapA PE=1 SV=1	1557.01	0	38	sp|Q76NM6|VATA_PLAF7	1.32804e+08	1.18553e+08	1.27528e+08	1.17891e+08	1.20598e+08	1.16407e+08	1.27528e+08	1.17891e+08	0.0570497	0.0179639	-0.113357	0.0151515	0.0151515	0.392468
tr|Q8II61|Q8II61_PLAF7	Q8II61	PF3D7_1130200	60S acidic ribosomal protein P0 OS=Plasmodium falciparum (isolate 3D7) OX=36329 GN=PF3D7_1130200 PE=3 SV=1	2048.65	0	27	tr|Q8II61|Q8II61_PLAF7	5.53791e+08	4.19943e+08	4.6412e+08	4.43229e+08	4.37618e+08	4.3183e+08	4.6412e+08	4.37618e+08	0.142296	0.0130255	-0.0848235	0.0261438	0.0261438	0.39289
tr|Q8ILB8|Q8ILB8_PLAF7	Q8ILB8	PF3D7_1434600	Methionine aminopeptidase 2 OS=Plasmodium falciparum (isolate 3D7) OX=36329 GN=PF3D7_1434600 PE=3 SV=1	698.97	0	17	tr|Q8ILB8|Q8ILB8_PLAF7	2.37192e+07	2.13791e+07	2.19364e+07	2.08471e+07	2.08721e+07	2.11378e+07	2.19364e+07	2.08721e+07	0.0547044	0.00769034	-0.0717531	0.0175439	0.0175439	0.393119
tr|Q8I2T4|Q8I2T4_PLAF7	Q8I2T4	PF3D7_0921900	Uncharacterized protein OS=Plasmodium falciparum (isolate 3D7) OX=36329 GN=PF3D7_0921900 PE=4 SV=1	199.22	0	6	tr|Q8I2T4|Q8I2T4_PLAF7	4.01159e+06	5.49046e+06	4.70841e+06	3.54327e+06	4.88417e+06	4.26503e+06	4.70841e+06	4.26503e+06	0.15619	0.158623	-0.142686	0	0	0.393176
tr|A0A144A0N0|A0A144A0N0_PLAF7	A0A144A0N0	PF3D7_1243500	Vacuolar-sorting protein SNF7, putative OS=Plasmodium falciparum (isolate 3D7) OX=36329 GN=PF3D7_1243500 PE=4 SV=1	64.53	0.000831255	1	tr|A0A144A0N0|A0A144A0N0_PLAF7	100603	236525	191046	48944.4	164834	183363	191046	164834	0.39299	0.550303	-0.212905	0	0	0.393248
tr|Q8ID72|Q8ID72_PLAF7	Q8ID72	PF3D7_1363400	Polyubiquitin binding protein, putative OS=Plasmodium falciparum (isolate 3D7) OX=36329 GN=PF3D7_1363400 PE=4 SV=1	144.94	0	5	tr|Q8ID72|Q8ID72_PLAF7	794648	797274	836304	739935	974178	962614	797274	962614	0.0288227	0.147974	0.271883	0	0	0.393598
tr|Q8IAQ8|Q8IAQ8_PLAF7	Q8IAQ8	PF3D7_0806800	Vacuolar proton translocating ATPase subunit A,putative OS=Plasmodium falciparum (isolate 3D7) OX=36329 GN=PF3D7_0806800 PE=4 SV=1	800.77	0	22	tr|Q8IAQ8|Q8IAQ8_PLAF7	2.55386e+07	1.63631e+07	1.60155e+07	2.34211e+07	2.05802e+07	2.05901e+07	1.63631e+07	2.05901e+07	0.279743	0.076048	0.331506	0.0493827	0	0.394728
tr|Q8ILR0|Q8ILR0_PLAF7	Q8ILR0	PF3D7_1419000	Uncharacterized protein OS=Plasmodium falciparum (isolate 3D7) OX=36329 GN=PF3D7_1419000 PE=4 SV=1	44.09	0.00221239	2	tr|Q8ILR0|Q8ILR0_PLAF7	716925	87238.1	43595.9	84665.2	73364.1	66147.6	87238.1	73364.1	1.33333	0.124904	-0.249883	0.166667	0	0.394775
tr|Q8IBA2|Q8IBA2_PLAF7	Q8IBA2	PF3D7_0827000	ATP-dependent RNA helicase DBP10, putative OS=Plasmodium falciparum (isolate 3D7) OX=36329 GN=PF3D7_0827000 PE=4 SV=1	74.06	0.000865052	4	tr|Q8IBA2|Q8IBA2_PLAF7	346114	369737	444499	474423	472547	352005	369737	472547	0.132788	0.161996	0.353959	0	0	0.395231
tr|C6KSL5|C6KSL5_PLAF7	C6KSL5	PF3D7_0601200	Pfmc-2TM Maurer's cleft two transmembrane protein OS=Plasmodium falciparum (isolate 3D7) OX=36329 GN=PF3D7_0601200 PE=4 SV=1	526.04	0	7	tr|C6KSL5|C6KSL5_PLAF7	3.16046e+07	2.85138e+07	2.28339e+07	3.43301e+07	2.89969e+07	2.81333e+07	2.85138e+07	2.89969e+07	0.160884	0.110092	0.0242402	0.0555556	0.0833333	0.396572
tr|A0A144A382|A0A144A382_PLAF7	A0A144A382	PF3D7_1251500	ATP-dependent RNA helicase DRS1, putative OS=Plasmodium falciparum (isolate 3D7) OX=36329 GN=PF3D7_1251500 PE=3 SV=1	163.5	0	6	tr|A0A144A382|A0A144A382_PLAF7	1.23752e+06	808924	889494	953844	1.10628e+06	1.22085e+06	889494	1.10628e+06	0.232752	0.122477	0.314661	0.0555556	0	0.399101
tr|Q8IDJ7|Q8IDJ7_PLAF7	Q8IDJ7	PF3D7_1350200	Small nuclear ribonucleoprotein E OS=Plasmodium falciparum (isolate 3D7) OX=36329 GN=PF3D7_1350200 PE=3 SV=1	64.81	0.000831947	2	tr|Q8IDJ7|Q8IDJ7_PLAF7	2.77316e+06	1.64187e+06	1.89097e+06	1.41721e+06	1.82589e+06	2.09532e+06	1.89097e+06	1.82589e+06	0.282795	0.191872	-0.0505291	0	0	0.399133
tr|Q8IE83|Q8IE83_PLAF7	Q8IE83	PF3D7_1323300	Acetyltransferase, GNAT family, putative OS=Plasmodium falciparum (isolate 3D7) OX=36329 GN=PF3D7_1323300 PE=4 SV=1	32.9	0.00812458	1	tr|Q8IE83|Q8IE83_PLAF7	626.386	626.386	3896.1	626.386	2830.77	6609.62	626.386	2830.77	1.09991	0.901762	2.17607	0.666667	0.333333	0.399525
tr|Q8IDA4|Q8IDA4_PLAF7	Q8IDA4	PF3D7_1360100	RNA-binding protein, putative OS=Plasmodium falciparum (isolate 3D7) OX=36329 GN=PF3D7_1360100 PE=4 SV=1	144.58	0	2	tr|Q8IDA4|Q8IDA4_PLAF7	1.21394e+06	2.43845e+06	2.29849e+06	2.03571e+06	2.6073e+06	2.21182e+06	2.29849e+06	2.21182e+06	0.337882	0.128111	-0.0554555	0	0	0.400432
tr|Q8IHN1|Q8IHN1_PLAF7	Q8IHN1	PF3D7_1149200	Ring-infected erythrocyte surface antigen OS=Plasmodium falciparum (isolate 3D7) OX=36329 GN=PF3D7_1149200 PE=4 SV=1	186.59	0	6	tr|Q8IHN1|Q8IHN1_PLAF7	4.65479e+06	1.23538e+06	1.31027e+06	3.44303e+06	2.365e+06	2.51411e+06	1.31027e+06	2.51411e+06	0.813673	0.210571	0.940185	0	0	0.401426
tr|C0H4T1|C0H4T1_PLAF7	C0H4T1	PF3D7_0808400	Coatomer subunit epsilon, putative OS=Plasmodium falciparum (isolate 3D7) OX=36329 GN=PF3D7_0808400 PE=4 SV=1	132.13	0	4	tr|C0H4T1|C0H4T1_PLAF7	2.75918e+06	2.57484e+06	1.88548e+06	2.75344e+06	1.99248e+06	1.48428e+06	2.57484e+06	1.99248e+06	0.191371	0.30758	-0.369913	0	0	0.40336
tr|Q8I639|Q8I639_PLAF7	Q8I639	PF3D7_1200600	Erythrocyte membrane protein 1, PfEMP1 OS=Plasmodium falciparum (isolate 3D7) OX=36329 GN=PF3D7_1200600 PE=1 SV=1	905.81	0	26	tr|Q8I639|Q8I639_PLAF7	7.25218e+06	4.85922e+06	4.90787e+06	1.00794e+07	5.78419e+06	5.19766e+06	4.90787e+06	5.78419e+06	0.241094	0.379653	0.237018	0.0595238	0.0119048	0.403402
tr|Q8IJA5|Q8IJA5_PLAF7	Q8IJA5	PF3D7_1030000	Transcription elongation factor SPT4, putative OS=Plasmodium falciparum (isolate 3D7) OX=36329 GN=PF3D7_1030000 PE=3 SV=1	236.73	0	5	tr|Q8IJA5|Q8IJA5_PLAF7	1.5887e+06	1.96206e+06	2.22324e+06	1.99783e+06	2.32415e+06	2.00606e+06	1.96206e+06	2.00606e+06	0.165701	0.0882104	0.0319973	0	0	0.403818
tr|Q8IBI8|Q8IBI8_PLAF7	Q8IBI8	PF3D7_0726900	Mitochondrial import inner membrane translocase subunit TIM50 OS=Plasmodium falciparum (isolate 3D7) OX=36329 GN=PF3D7_0726900 PE=3 SV=1	78.76	0	3	tr|Q8IBI8|Q8IBI8_PLAF7	265891	152824	194791	210386	218773	260007	194791	218773	0.279489	0.11562	0.16751	0	0	0.405986
tr|Q8IHT9|Q8IHT9_PLAF7	Q8IHT9	PF3D7_1142600	60S ribosomal protein L35ae, putative OS=Plasmodium falciparum (isolate 3D7) OX=36329 GN=PF3D7_1142600 PE=1 SV=1	231.08	0	8	tr|Q8IHT9|Q8IHT9_PLAF7	5.61518e+07	5.466e+07	6.10473e+07	5.64571e+07	5.94724e+07	7.07226e+07	5.61518e+07	5.94724e+07	0.0583273	0.120842	0.0828866	0	0	0.407736
tr|Q8ILT0|Q8ILT0_PLAF7	Q8ILT0	PF3D7_1416500	Glutamate dehydrogenase OS=Plasmodium falciparum (isolate 3D7) OX=36329 GN=PF3D7_1416500 PE=3 SV=1	975.72	0	17	tr|Q8ILT0|Q8ILT0_PLAF7	5.79912e+07	3.87658e+07	4.54497e+07	4.26559e+07	4.001e+07	4.38542e+07	4.54497e+07	4.26559e+07	0.205904	0.0466411	-0.0915248	0	0	0.407962
tr|Q8IIK7|Q8IIK7_PLAF7	Q8IIK7	PF3D7_1115800	Uncharacterized protein OS=Plasmodium falciparum (isolate 3D7) OX=36329 GN=PF3D7_1115800 PE=4 SV=1	681.28	0	14	tr|Q8IIK7|Q8IIK7_PLAF7	8.90256e+06	8.71004e+06	7.4628e+06	7.21395e+06	7.95029e+06	8.07798e+06	8.71004e+06	7.95029e+06	0.093512	0.0601979	-0.131671	0.037037	0.0185185	0.407966
tr|Q8I390|Q8I390_PLAF7	Q8I390	PF3D7_0905900	Coatomer subunit beta' OS=Plasmodium falciparum (isolate 3D7) OX=36329 GN=PF3D7_0905900 PE=3 SV=1	319.77	0	11	tr|Q8I390|Q8I390_PLAF7	4.68932e+06	4.43971e+06	4.69233e+06	4.37175e+06	5.05251e+06	5.58104e+06	4.68932e+06	5.05251e+06	0.0314702	0.121205	0.107622	0.0555556	0.0277778	0.408672
tr|Q8I5M3|Q8I5M3_PLAF7	Q8I5M3	PF3D7_1218500	Uncharacterized protein OS=Plasmodium falciparum (isolate 3D7) OX=36329 GN=PF3D7_1218500 PE=4 SV=1	630.75	0	17	tr|Q8I5M3|Q8I5M3_PLAF7	5.8438e+06	4.74116e+06	5.41406e+06	5.95614e+06	5.29403e+06	6.00459e+06	5.41406e+06	5.95614e+06	0.104213	0.0690232	0.137665	0.0454545	0.0606061	0.408678
tr|C6KTB3|C6KTB3_PLAF7	C6KTB3	PF3D7_0627700	Transportin OS=Plasmodium falciparum (isolate 3D7) OX=36329 GN=PF3D7_0627700 PE=4 SV=1	673.51	0	20	tr|C6KTB3|C6KTB3_PLAF7	1.96175e+07	1.34898e+07	1.67533e+07	1.36672e+07	1.34383e+07	1.72224e+07	1.67533e+07	1.36672e+07	0.184473	0.143597	-0.293727	0.0793651	0.015873	0.408721
tr|Q8I294|Q8I294_PLAF7	Q8I294	PF3D7_0104500	Uncharacterized protein OS=Plasmodium falciparum (isolate 3D7) OX=36329 GN=PF3D7_0104500 PE=4 SV=2	302.42	0	6	tr|Q8I294|Q8I294_PLAF7	1.0748e+07	8.32733e+06	8.12079e+06	8.65761e+06	6.95896e+06	8.87461e+06	8.32733e+06	8.65761e+06	0.161148	0.128493	0.0561151	0	0	0.408964
tr|Q8IEL2|Q8IEL2_PLAF7	Q8IEL2	PF3D7_1310300	Zinc finger protein, putative OS=Plasmodium falciparum (isolate 3D7) OX=36329 GN=PF3D7_1310300 PE=4 SV=1	51.51	0.000775795	1	tr|Q8IEL2|Q8IEL2_PLAF7	155146	122158	114641	122383	110665	122280	122158	122280	0.164918	0.0568719	0.00144391	0	0	0.409234
tr|O77360|O77360_PLAF7	O77360	PF3D7_0310500	ATP-dependent RNA helicase DHX57, putative OS=Plasmodium falciparum (isolate 3D7) OX=36329 GN=PF3D7_0310500 PE=4 SV=1	104.02	0	4	tr|O77360|O77360_PLAF7	1.22152e+06	2.23548e+06	2.19116e+06	1.81766e+06	2.35187e+06	2.28985e+06	2.19116e+06	2.28985e+06	0.304369	0.135698	0.0635587	0.0833333	0	0.410025
tr|Q8I3I5|Q8I3I5_PLAF7	Q8I3I5	PF3D7_0528200	Eukaryotic translation initiation factor 3 subunit E OS=Plasmodium falciparum (isolate 3D7) OX=36329 GN=PF3D7_0528200 PE=3 SV=1	663.96	0	23	tr|Q8I3I5|Q8I3I5_PLAF7	3.66618e+07	3.53818e+07	3.51915e+07	3.7219e+07	3.69165e+07	3.97241e+07	3.53818e+07	3.7219e+07	0.0223709	0.0406052	0.0730319	0.0266667	0.04	0.41147
tr|C0H4L6|C0H4L6_PLAF7	C0H4L6	PF3D7_0706500	Uncharacterized protein OS=Plasmodium falciparum (isolate 3D7) OX=36329 GN=PF3D7_0706500 PE=4 SV=1	807.06	0	24	tr|C0H4L6|C0H4L6_PLAF7	1.56877e+07	1.89767e+07	1.83354e+07	1.68906e+07	2.06031e+07	2.01429e+07	1.83354e+07	2.01429e+07	0.0986892	0.105335	0.135642	0	0.0384615	0.41196
tr|Q8IJ82|Q8IJ82_PLAF7	Q8IJ82	PF3D7_1032500	Derlin OS=Plasmodium falciparum (isolate 3D7) OX=36329 GN=PF3D7_1032500 PE=3 SV=1	82.11	0	3	tr|Q8IJ82|Q8IJ82_PLAF7	1.31061e+06	1.0737e+06	1.23638e+06	1.20265e+06	1.04211e+06	1.1036e+06	1.23638e+06	1.1036e+06	0.100403	0.0725722	-0.163907	0.333333	0.222222	0.412328
tr|C0H4F1|C0H4F1_PLAF7	C0H4F1	PF3D7_0519700	FoP_duplication domain-containing protein OS=Plasmodium falciparum (isolate 3D7) OX=36329 GN=PF3D7_0519700 PE=4 SV=1	557.14	0	10	tr|C0H4F1|C0H4F1_PLAF7	4.69299e+07	4.65367e+07	4.44776e+07	4.35335e+07	4.42633e+07	4.23276e+07	4.65367e+07	4.35335e+07	0.0286438	0.022537	-0.0962458	0.0416667	0.0625	0.41303
tr|Q8IIM5|Q8IIM5_PLAF7	Q8IIM5	PF3D7_1113700	Glyoxalase I OS=Plasmodium falciparum (isolate 3D7) OX=36329 GN=PF3D7_1113700 PE=4 SV=1	191.02	0	6	tr|Q8IIM5|Q8IIM5_PLAF7	7.63551e+06	4.75457e+06	5.15066e+06	4.34338e+06	4.51848e+06	6.20033e+06	5.15066e+06	4.51848e+06	0.267078	0.204214	-0.188918	0	0	0.413261
tr|O96203|O96203_PLAF7	O96203	PF3D7_0212300	Peptide chain release factor subunit 1,putative OS=Plasmodium falciparum (isolate 3D7) OX=36329 GN=PF3D7_0212300 PE=4 SV=1	537.14	0	13	tr|O96203|O96203_PLAF7	4.96264e+07	3.36043e+07	3.69313e+07	3.3753e+07	3.37711e+07	3.92097e+07	3.69313e+07	3.37711e+07	0.211095	0.0884043	-0.129055	0.0666667	0.0222222	0.413504
tr|O97250|O97250_PLAF7	O97250	PF3D7_0307200	60S ribosomal protein L7, putative OS=Plasmodium falciparum (isolate 3D7) OX=36329 GN=PF3D7_0307200 PE=1 SV=2	1137.27	0	22	tr|O97250|O97250_PLAF7	5.34826e+08	3.01214e+08	3.05832e+08	3.37621e+08	2.93423e+08	3.18345e+08	3.05832e+08	3.18345e+08	0.350904	0.0700212	0.057853	0.020202	0.030303	0.413523
tr|Q8ILR7|Q8ILR7_PLAF7	Q8ILR7	PF3D7_1417800	DNA helicase OS=Plasmodium falciparum (isolate 3D7) OX=36329 GN=PF3D7_1417800 PE=3 SV=1	1601.88	0	40	tr|Q8ILR7|Q8ILR7_PLAF7	5.80285e+07	5.90514e+07	5.91111e+07	5.12064e+07	5.7309e+07	5.72516e+07	5.90514e+07	5.72516e+07	0.010362	0.0634669	-0.0446536	0.0144928	0.0144928	0.413568
tr|C6KT34|C6KT34_PLAF7	C6KT34	PF3D7_0619400	Cell division cycle protein 48 homologue,putative OS=Plasmodium falciparum (isolate 3D7) OX=36329 GN=PF3D7_0619400 PE=4 SV=1	3040.88	0	57	tr|C6KT34|C6KT34_PLAF7	1.88421e+08	1.90415e+08	1.92819e+08	1.89584e+08	1.79253e+08	1.69669e+08	1.90415e+08	1.79253e+08	0.0115558	0.0554877	-0.0871501	0.0213675	0.0299145	0.414443
tr|Q8IAN1|Q8IAN1_PLAF7	Q8IAN1	PF3D7_0803100	U3 small nucleolar RNA-associated protein 14,putative OS=Plasmodium falciparum (isolate 3D7) OX=36329 GN=PF3D7_0803100 PE=4 SV=1	61.41	0.000819672	2	tr|Q8IAN1|Q8IAN1_PLAF7	87606.5	243188	227789	149644	289487	260734	227789	260734	0.460412	0.316566	0.194883	0	0	0.414724
tr|Q8IJR9|Q8IJR9_PLAF7	Q8IJR9	PF3D7_1012600	GMP synthase [glutamine-hydrolyzing] OS=Plasmodium falciparum (isolate 3D7) OX=36329 GN=PF3D7_1012600 PE=1 SV=1	886.31	0	24	tr|Q8IJR9|Q8IJR9_PLAF7	4.19884e+07	3.62697e+07	3.76411e+07	3.6464e+07	3.34803e+07	3.81221e+07	3.76411e+07	3.6464e+07	0.0772813	0.0653002	-0.0458359	0	0	0.415809
tr|Q8IL02|Q8IL02_PLAF7	Q8IL02	PF3D7_1447000	40S ribosomal protein S5 OS=Plasmodium falciparum (isolate 3D7) OX=36329 GN=PF3D7_1447000 PE=1 SV=1	1230.15	0	23	tr|Q8IL02|Q8IL02_PLAF7	3.12572e+08	2.35571e+08	2.54697e+08	2.5797e+08	2.33551e+08	2.41642e+08	2.54697e+08	2.41642e+08	0.149815	0.0508982	-0.075912	0.0350877	0.0438596	0.415886
tr|Q8ILT8|Q8ILT8_PLAF7	Q8ILT8	PF3D7_1415800	rRNA adenine N(6)-methyltransferase OS=Plasmodium falciparum (isolate 3D7) OX=36329 GN=PF3D7_1415800 PE=1 SV=1	68.71	0.000840336	2	tr|Q8ILT8|Q8ILT8_PLAF7	734509	377403	413549	423514	426979	393739	413549	423514	0.386585	0.0440592	0.034354	0.111111	0	0.416485
tr|Q8I5Q3|Q8I5Q3_PLAF7	Q8I5Q3	PF3D7_1215300	10 kDa chaperonin OS=Plasmodium falciparum (isolate 3D7) OX=36329 GN=PF3D7_1215300 PE=3 SV=2	166.8	0	5	tr|Q8I5Q3|Q8I5Q3_PLAF7	5.53011e+07	5.08329e+07	4.41457e+07	5.80329e+07	5.3817e+07	5.02606e+07	5.08329e+07	5.3817e+07	0.112079	0.0720028	0.0823001	0	0	0.416781
tr|Q8I2S6|Q8I2S6_PLAF7	Q8I2S6	PF3D7_0923000	DNA-directed RNA polymerase II subunit RPB3,putative OS=Plasmodium falciparum (isolate 3D7) OX=36329 GN=PF3D7_0923000 PE=4 SV=1	129.83	0	5	tr|Q8I2S6|Q8I2S6_PLAF7	2.39322e+06	2.19396e+06	2.41631e+06	2.59395e+06	2.31862e+06	2.56205e+06	2.39322e+06	2.56205e+06	0.0523685	0.060444	0.0983417	0	0	0.417668
tr|Q8IBU5|Q8IBU5_PLAF7	Q8IBU5	PF3D7_0715500	Mitochondrial ATP synthase F1, epsilon subunit,putative OS=Plasmodium falciparum (isolate 3D7) OX=36329 GN=PF3D7_0715500 PE=4 SV=1	75.45	0.000869565	2	tr|Q8IBU5|Q8IBU5_PLAF7	100929	194946	169598	113828	214604	283678	169598	214604	0.313512	0.418633	0.339558	0	0	0.418122
tr|Q8I5P5|Q8I5P5_PLAF7	Q8I5P5	PF3D7_1216200	Glycerol-3-phosphate dehydrogenase [NAD(+)] OS=Plasmodium falciparum (isolate 3D7) OX=36329 GN=PF3D7_1216200 PE=1 SV=1	831.65	0	15	tr|Q8I5P5|Q8I5P5_PLAF7	7.57163e+07	4.76319e+07	5.53355e+07	5.25833e+07	4.65257e+07	5.71275e+07	5.53355e+07	5.25833e+07	0.243636	0.102131	-0.0736006	0.0769231	0.0641026	0.418636
tr|Q8I2D9|Q8I2D9_PLAF7	Q8I2D9	PF3D7_0113900	Uncharacterized protein OS=Plasmodium falciparum (isolate 3D7) OX=36329 GN=PF3D7_0113900 PE=4 SV=1	226.12	0	6	tr|Q8I2D9|Q8I2D9_PLAF7	1.55427e+07	9.66441e+06	8.62654e+06	1.44121e+07	1.07654e+07	1.31489e+07	9.66441e+06	1.31489e+07	0.33071	0.144949	0.444184	0	0	0.418718
tr|O96191|O96191_PLAF7	O96191	PF3D7_0210900	Uncharacterized protein OS=Plasmodium falciparum (isolate 3D7) OX=36329 GN=PF3D7_0210900 PE=4 SV=1	387.21	0	10	tr|O96191|O96191_PLAF7	3.48826e+07	3.53173e+07	3.04216e+07	3.05631e+07	3.39595e+07	2.9051e+07	3.48826e+07	3.05631e+07	0.0807924	0.0805935	-0.190719	0.030303	0	0.419147
tr|Q8IL16|Q8IL16_PLAF7	Q8IL16	PF3D7_1445700	Uncharacterized protein OS=Plasmodium falciparum (isolate 3D7) OX=36329 GN=PF3D7_1445700 PE=4 SV=1	704.92	0	18	tr|Q8IL16|Q8IL16_PLAF7	3.26878e+07	4.45821e+07	3.7127e+07	2.94265e+07	3.95238e+07	3.41228e+07	3.7127e+07	3.41228e+07	0.157623	0.147063	-0.121733	0	0	0.419361
tr|Q8II92|Q8II92_PLAF7	Q8II92	PF3D7_1127100	Deoxyuridine 5'-triphosphate nucleotidohydrolase OS=Plasmodium falciparum (isolate 3D7) OX=36329 GN=PF3D7_1127100 PE=1 SV=1	460.55	0	8	tr|Q8II92|Q8II92_PLAF7	3.75296e+07	4.22302e+07	3.92209e+07	3.24754e+07	3.65891e+07	4.13976e+07	3.92209e+07	3.65891e+07	0.0600321	0.121281	-0.100209	0	0	0.419527
tr|Q8IEP9|Q8IEP9_PLAF7	Q8IEP9	PF3D7_1306600	V-type proton ATPase subunit H OS=Plasmodium falciparum (isolate 3D7) OX=36329 GN=PF3D7_1306600 PE=3 SV=2	117.66	0	4	tr|Q8IEP9|Q8IEP9_PLAF7	1.74141e+06	1.06075e+06	1.03759e+06	953148	1.10938e+06	1.19459e+06	1.06075e+06	1.10938e+06	0.312392	0.112782	0.0646667	0	0.0833333	0.420156
tr|Q8I1X5|Q8I1X5_PLAF7	Q8I1X5	PF3D7_0405400	Pre-mRNA-processing-splicing factor 8, putative OS=Plasmodium falciparum (isolate 3D7) OX=36329 GN=PF3D7_0405400 PE=4 SV=1	760.72	0	30	tr|Q8I1X5|Q8I1X5_PLAF7	7.00365e+06	5.17259e+06	5.80048e+06	6.31896e+06	6.09783e+06	7.12213e+06	5.80048e+06	6.31896e+06	0.155279	0.0827593	0.123516	0.0222222	0	0.422321
tr|C0H4V4|C0H4V4_PLAF7	C0H4V4	PF3D7_0817700	Rhoptry neck protein 5 OS=Plasmodium falciparum (isolate 3D7) OX=36329 GN=PF3D7_0817700 PE=4 SV=1	156.56	0	3	tr|C0H4V4|C0H4V4_PLAF7	723092	84330.4	64900.9	433791	45238.2	14367.1	84330.4	45238.2	1.28802	1.42129	-0.898511	0.111111	0.444444	0.422593
tr|Q8IE67|Q8IE67_PLAF7	Q8IE67	PF3D7_1325100	Phosphoribosylpyrophosphate synthetase OS=Plasmodium falciparum (isolate 3D7) OX=36329 GN=PF3D7_1325100 PE=4 SV=1	1625.68	0	23	tr|Q8IE67|Q8IE67_PLAF7	1.17518e+08	9.07147e+07	9.2319e+07	1.19477e+08	1.04021e+08	1.02768e+08	9.2319e+07	1.04021e+08	0.150057	0.0855713	0.172179	0.0438596	0.0175439	0.42317
tr|Q8IDC0|Q8IDC0_PLAF7	Q8IDC0	PF3D7_1358500	Zinc finger protein, putative OS=Plasmodium falciparum (isolate 3D7) OX=36329 GN=PF3D7_1358500 PE=4 SV=1	96.28	0	3	tr|Q8IDC0|Q8IDC0_PLAF7	924107	530746	720166	509890	596392	748840	720166	596392	0.271343	0.195645	-0.272068	0	0	0.424758
tr|Q8IBH7|Q8IBH7_PLAF7	Q8IBH7	PF3D7_0728000	Eukaryotic translation initiation factor 2 subunit alpha, putative OS=Plasmodium falciparum (isolate 3D7) OX=36329 GN=PF3D7_0728000 PE=4 SV=1	617.25	0	14	tr|Q8IBH7|Q8IBH7_PLAF7	4.53219e+07	3.75305e+07	4.00988e+07	3.94069e+07	3.71748e+07	3.79778e+07	4.00988e+07	3.79778e+07	0.0968768	0.0296064	-0.0784007	0.0333333	0.05	0.424885
tr|Q8I2P4|Q8I2P4_PLAF7	Q8I2P4	PF3D7_0926500	Uncharacterized protein OS=Plasmodium falciparum (isolate 3D7) OX=36329 GN=PF3D7_0926500 PE=4 SV=1	40.75	0.00359712	1	tr|Q8I2P4|Q8I2P4_PLAF7	8.79753e+06	1.03588e+07	9.38034e+06	7.45947e+06	9.52242e+06	9.35286e+06	9.38034e+06	9.35286e+06	0.0829385	0.130463	-0.00423358	0	0	0.424949
tr|Q8II43|Q8II43_PLAF7	Q8II43	PF3D7_1132200	T-complex protein 1 subunit alpha OS=Plasmodium falciparum (isolate 3D7) OX=36329 GN=PF3D7_1132200 PE=3 SV=1	2058.54	0	36	tr|Q8II43|Q8II43_PLAF7	1.72233e+08	1.45999e+08	1.4734e+08	1.44256e+08	1.36178e+08	1.52837e+08	1.4734e+08	1.44256e+08	0.0952008	0.0576805	-0.0305263	0.0326797	0.0457516	0.425248
tr|Q8ILM2|Q8ILM2_PLAF7	Q8ILM2	PF3D7_1423000	Nucleolar GTP-binding protein 2 OS=Plasmodium falciparum (isolate 3D7) OX=36329 GN=PF3D7_1423000 PE=3 SV=1	219.66	0	1	tr|Q8ILM2|Q8ILM2_PLAF7	299860	306422	300392	264966	357821	390986	300392	357821	0.0120599	0.193308	0.252391	0	0	0.425786
tr|Q8I492|Q8I492_PLAF7	Q8I492	PF3D7_0500800	Mature parasite-infected erythrocyte surface antigen OS=Plasmodium falciparum (isolate 3D7) OX=36329 GN=PF3D7_0500800 PE=4 SV=1	3664.53	0	72	tr|Q8I492|Q8I492_PLAF7	2.94404e+08	2.414e+08	2.06075e+08	3.26138e+08	2.46843e+08	2.52081e+08	2.414e+08	2.52081e+08	0.179781	0.161246	0.0624627	0.0263158	0.0233918	0.428184
tr|Q8IBQ5|Q8IBQ5_PLAF7	Q8IBQ5	PF3D7_0719700	40S ribosomal protein S10, putative OS=Plasmodium falciparum (isolate 3D7) OX=36329 GN=PF3D7_0719700 PE=1 SV=1	582.75	0	12	tr|Q8IBQ5|Q8IBQ5_PLAF7	8.16419e+07	5.94816e+07	6.03112e+07	5.19794e+07	6.04127e+07	6.81552e+07	6.03112e+07	6.04127e+07	0.187082	0.13443	0.00242558	0.0526316	0.0877193	0.428344
tr|Q8IBB6|Q8IBB6_PLAF7	Q8IBB6	PF3D7_0828500	Translation initiation factor eIF-2B subunit alpha, putative OS=Plasmodium falciparum (isolate 3D7) OX=36329 GN=PF3D7_0828500 PE=3 SV=1	45.42	0.00148588	3	tr|Q8IBB6|Q8IBB6_PLAF7	1.83097e+06	2.1919e+06	2.16136e+06	1.78289e+06	1.81756e+06	2.12281e+06	2.16136e+06	1.81756e+06	0.097092	0.098046	-0.249935	0	0	0.428717
tr|Q8IKQ5|Q8IKQ5_PLAF7	Q8IKQ5	PF3D7_1457500	Vacuolar protein sorting-associated protein 4 OS=Plasmodium falciparum (isolate 3D7) OX=36329 GN=PF3D7_1457500 PE=3 SV=1	34.08	0.00683995	1	tr|Q8IKQ5|Q8IKQ5_PLAF7	3557.47	3056.92	5947.58	9773.06	3403.14	4313.82	3557.47	4313.82	0.368932	0.59091	0.278114	0	0	0.428753
tr|Q8IK60|Q8IK60_PLAF7	Q8IK60	PF3D7_1477500	PRESAN domain-containing protein OS=Plasmodium falciparum (isolate 3D7) OX=36329 GN=PF3D7_1477500 PE=4 SV=2	293.08	0	8	tr|Q8IK60|Q8IK60_PLAF7	7.3359e+06	3.91295e+06	3.82972e+06	6.81702e+06	5.78178e+06	4.68843e+06	3.91295e+06	5.78178e+06	0.398055	0.18472	0.563257	0	0	0.429174
tr|Q8IBM7|Q8IBM7_PLAF7	Q8IBM7	PF3D7_0722600	U3 small nucleolar RNA-associated protein 7,putative OS=Plasmodium falciparum (isolate 3D7) OX=36329 GN=PF3D7_0722600 PE=4 SV=1	108.93	0	3	tr|Q8IBM7|Q8IBM7_PLAF7	862973	935366	1.01219e+06	881024	1.02895e+06	1.15545e+06	935366	1.02895e+06	0.0796499	0.134421	0.137565	0.166667	0	0.42927
tr|C6KTC6|C6KTC6_PLAF7	C6KTC6	PF3D7_0629100	Nicotinate phosphoribosyltransferase, putative OS=Plasmodium falciparum (isolate 3D7) OX=36329 GN=PF3D7_0629100 PE=4 SV=1	348.51	0	12	tr|C6KTC6|C6KTC6_PLAF7	8.1417e+06	7.68372e+06	7.91868e+06	6.61101e+06	7.24225e+06	8.33828e+06	7.91868e+06	7.24225e+06	0.0289356	0.118153	-0.128822	0	0	0.431437
tr|Q8I5H2|Q8I5H2_PLAF7	Q8I5H2	PF3D7_1224500	Histone chaperone ASF1, putative OS=Plasmodium falciparum (isolate 3D7) OX=36329 GN=PF3D7_1224500 PE=1 SV=1	208.02	0	6	tr|Q8I5H2|Q8I5H2_PLAF7	3.81185e+06	6.46969e+06	5.76484e+06	4.27376e+06	5.10713e+06	4.44046e+06	5.76484e+06	4.44046e+06	0.257423	0.0957148	-0.37657	0	0	0.431989
tr|Q8IEE5|Q8IEE5_PLAF7	Q8IEE5	PF3D7_1317100	DNA replication licensing factor MCM4 OS=Plasmodium falciparum (isolate 3D7) OX=36329 GN=PF3D7_1317100 PE=3 SV=1	1186.58	0	26	tr|Q8IEE5|Q8IEE5_PLAF7	3.26216e+07	3.51391e+07	3.5788e+07	2.94447e+07	3.48924e+07	3.27242e+07	3.51391e+07	3.27242e+07	0.0484563	0.0847718	-0.102716	0.0648148	0.0648148	0.433009
tr|Q8IFM0|Q8IFM0_PLAF7	Q8IFM0	PF3D7_0424600	PRESAN domain-containing protein OS=Plasmodium falciparum (isolate 3D7) OX=36329 GN=PF3D7_0424600 PE=4 SV=1	1239.53	0	17	tr|Q8IFM0|Q8IFM0_PLAF7	1.62744e+08	1.17189e+08	1.11273e+08	1.64861e+08	1.30036e+08	1.3723e+08	1.17189e+08	1.3723e+08	0.215983	0.127635	0.227761	0.0357143	0.0119048	0.433282
tr|Q8IEK1|Q8IEK1_PLAF7	Q8IEK1	PF3D7_1311800	M1-family alanyl aminopeptidase OS=Plasmodium falciparum (isolate 3D7) OX=36329 GN=PF3D7_1311800 PE=1 SV=1	5392.53	0	88	tr|Q8IEK1|Q8IEK1_PLAF7	8.65166e+08	6.80902e+08	7.57029e+08	6.4143e+08	6.80954e+08	7.94461e+08	7.57029e+08	6.80954e+08	0.120613	0.112583	-0.152791	0.0463576	0.0419426	0.433438
tr|Q8IL22|Q8IL22_PLAF7	Q8IL22	PF3D7_1445100	Histidine--tRNA ligase, putative OS=Plasmodium falciparum (isolate 3D7) OX=36329 GN=PF3D7_1445100 PE=4 SV=1	745.3	0	17	tr|Q8IL22|Q8IL22_PLAF7	7.53346e+06	6.27426e+06	6.84583e+06	5.63044e+06	6.16695e+06	7.27789e+06	6.84583e+06	6.16695e+06	0.0915809	0.132147	-0.15067	0.101449	0.0724638	0.433546
tr|Q8ID28|Q8ID28_PLAF7	Q8ID28	PF3D7_1368100	26S proteasome regulatory subunit RPN11,putative OS=Plasmodium falciparum (isolate 3D7) OX=36329 GN=PF3D7_1368100 PE=4 SV=1	661.1	0	13	tr|Q8ID28|Q8ID28_PLAF7	2.05209e+07	1.69831e+07	1.86649e+07	1.69535e+07	1.76978e+07	1.77837e+07	1.86649e+07	1.76978e+07	0.094516	0.0261204	-0.0767587	0.0185185	0	0.43411
tr|O97278|O97278_PLAF7	O97278	PF3D7_0319700	ABC transporter I family member 1, putative OS=Plasmodium falciparum (isolate 3D7) OX=36329 GN=PF3D7_0319700 PE=4 SV=4	38.79	0.00426439	2	tr|O97278|O97278_PLAF7	3791.45	38889.1	40695.2	31937.3	40514.9	23727.9	38889.1	31937.3	0.748585	0.261827	-0.284124	0	0.333333	0.435336
tr|Q8IIJ8|Q8IIJ8_PLAF7	Q8IIJ8	PF3D7_1116800	Heat shock protein 101 OS=Plasmodium falciparum (isolate 3D7) OX=36329 GN=PF3D7_1116800 PE=1 SV=1	2219.25	0	49	tr|Q8IIJ8|Q8IIJ8_PLAF7	1.08166e+08	6.69139e+07	7.29955e+07	1.01156e+08	8.31885e+07	8.99291e+07	7.29955e+07	8.99291e+07	0.269311	0.099278	0.30098	0.0222222	0.0333333	0.435786
tr|Q8IEM3|Q8IEM3_PLAF7	Q8IEM3	PF3D7_1309100	60S ribosomal protein L24, putative OS=Plasmodium falciparum (isolate 3D7) OX=36329 GN=PF3D7_1309100 PE=1 SV=1	487.04	0	10	tr|Q8IEM3|Q8IEM3_PLAF7	1.0134e+08	7.04258e+07	6.95037e+07	7.7064e+07	6.91968e+07	6.84064e+07	7.04258e+07	6.91968e+07	0.225313	0.0668942	-0.0253995	0	0.0277778	0.436191
tr|O77312|O77312_PLAF7	O77312	PF3D7_0302900	Exportin-1, putative OS=Plasmodium falciparum (isolate 3D7) OX=36329 GN=PF3D7_0302900 PE=4 SV=2	1597.9	0	36	tr|O77312|O77312_PLAF7	2.59472e+07	2.81389e+07	3.12356e+07	2.25613e+07	2.67123e+07	2.9468e+07	2.81389e+07	2.67123e+07	0.0934257	0.132463	-0.075064	0.0222222	0.0222222	0.436245
tr|Q8IBZ2|Q8IBZ2_PLAF7	Q8IBZ2	PF3D7_0709700	Lysophospholipase, putative OS=Plasmodium falciparum (isolate 3D7) OX=36329 GN=PF3D7_0709700 PE=4 SV=1	395.86	0	11	tr|Q8IBZ2|Q8IBZ2_PLAF7	3.83428e+06	3.53786e+06	3.51654e+06	4.00322e+06	3.87136e+06	3.67439e+06	3.53786e+06	3.87136e+06	0.0489355	0.0429878	0.129964	0.030303	0	0.436378
tr|Q9TY99|Q9TY99_PLAF7	Q9TY99	PF3D7_0202000	Knob-associated histidine-rich protein OS=Plasmodium falciparum (isolate 3D7) OX=36329 GN=PF3D7_0202000 PE=4 SV=1	2582.02	0	40	tr|Q9TY99|Q9TY99_PLAF7	9.94426e+08	7.29046e+08	6.10323e+08	1.20725e+09	7.24293e+08	8.00203e+08	7.29046e+08	8.00203e+08	0.252801	0.285215	0.134355	0.010582	0.021164	0.436391
tr|Q8IIU3|Q8IIU3_PLAF7	Q8IIU3	PF3D7_1106000	RuvB-like helicase OS=Plasmodium falciparum (isolate 3D7) OX=36329 GN=PF3D7_1106000 PE=3 SV=1	414.8	0	10	tr|Q8IIU3|Q8IIU3_PLAF7	1.02528e+07	8.87888e+06	9.57055e+06	9.6515e+06	9.37067e+06	7.60715e+06	9.57055e+06	9.37067e+06	0.0718041	0.124844	-0.0304491	0	0	0.436592
tr|C0H4T0|C0H4T0_PLAF7	C0H4T0	PF3D7_0808100	AP-3 complex subunit delta, putative OS=Plasmodium falciparum (isolate 3D7) OX=36329 GN=PF3D7_0808100 PE=4 SV=1	49.02	0.000761615	2	tr|C0H4T0|C0H4T0_PLAF7	18317	78713.3	61840.3	48527.2	64116.5	75172.3	61840.3	64116.5	0.588454	0.213826	0.0521483	0	0	0.436593
sp|Q76NM1|ERD2_PLAF7	Q76NM1	ERD2	ER lumen protein-retaining receptor OS=Plasmodium falciparum (isolate 3D7) OX=36329 GN=ERD2 PE=3 SV=1	51.95	0.000779423	1	sp|Q76NM1|ERD2_PLAF7	164247	35372.1	46013.7	84731.5	38192	24310.1	46013.7	38192	0.873648	0.644843	-0.268795	0	0	0.436825
sp|O97231|RL44_PLAF7	O97231	RPL44	60S ribosomal protein L44 OS=Plasmodium falciparum (isolate 3D7) OX=36329 GN=RPL44 PE=1 SV=3	264.32	0	5	sp|O97231|RL44_PLAF7	2.02789e+07	1.79637e+07	1.85417e+07	1.81404e+07	1.63104e+07	1.87767e+07	1.85417e+07	1.81404e+07	0.0636614	0.0721653	-0.0315655	0.0833333	0.125	0.437781
tr|Q8ID50|Q8ID50_PLAF7	Q8ID50	PF3D7_1365900	Ubiquitin-60S ribosomal protein L40 OS=Plasmodium falciparum (isolate 3D7) OX=36329 GN=PF3D7_1365900 PE=1 SV=1	668.92	0	11	tr|Q8ID50|Q8ID50_PLAF7	2.56546e+08	4.93186e+08	5.18853e+08	4.97736e+08	4.63221e+08	4.63677e+08	4.93186e+08	4.63677e+08	0.341966	0.0416888	-0.0890123	0	0.0350877	0.438084
tr|C6KSL9|C6KSL9_PLAF7	C6KSL9	PF3D7_0601900	Uncharacterized protein OS=Plasmodium falciparum (isolate 3D7) OX=36329 GN=PF3D7_0601900 PE=4 SV=1	275.65	0	5	tr|C6KSL9|C6KSL9_PLAF7	3.79464e+07	2.84177e+07	2.77919e+07	3.89969e+07	3.16418e+07	3.24595e+07	2.84177e+07	3.24595e+07	0.181317	0.117302	0.19185	0	0	0.438316
tr|Q8I533|Q8I533_PLAF7	Q8I533	PF3D7_1239000	HD superfamily phosphohydrolase protein OS=Plasmodium falciparum (isolate 3D7) OX=36329 GN=PF3D7_1239000 PE=4 SV=2	46.5	0.00149477	3	tr|Q8I533|Q8I533_PLAF7	163837	238030	282383	254368	256607	242529	238030	254368	0.262605	0.0301189	0.0957743	0	0	0.43889
tr|Q8ILK1|Q8ILK1_PLAF7	Q8ILK1	PF3D7_1426200	Protein arginine N-methyltransferase 1 OS=Plasmodium falciparum (isolate 3D7) OX=36329 GN=PF3D7_1426200 PE=3 SV=1	340.83	0	13	tr|Q8ILK1|Q8ILK1_PLAF7	9.59403e+06	8.38984e+06	9.98889e+06	7.18688e+06	8.237e+06	1.02388e+07	9.59403e+06	8.237e+06	0.0893327	0.181252	-0.220018	0.0666667	0.0222222	0.438919
tr|Q8II00|Q8II00_PLAF7	Q8II00	PF3D7_1136400	Signal recognition particle subunit SRP72,putative OS=Plasmodium falciparum (isolate 3D7) OX=36329 GN=PF3D7_1136400 PE=4 SV=1	141.99	0	2	tr|Q8II00|Q8II00_PLAF7	2.20026e+06	2.69176e+06	2.27178e+06	2.81645e+06	2.28367e+06	2.65652e+06	2.27178e+06	2.65652e+06	0.111202	0.105739	0.225713	0	0	0.43902
tr|Q8IB78|Q8IB78_PLAF7	Q8IB78	PF3D7_0824400	Nucleoside transporter 2 OS=Plasmodium falciparum (isolate 3D7) OX=36329 GN=PF3D7_0824400 PE=4 SV=1	386.54	0	11	tr|Q8IB78|Q8IB78_PLAF7	2.03494e+07	1.62037e+07	1.49192e+07	1.58712e+07	1.94037e+07	2.17145e+07	1.62037e+07	1.94037e+07	0.165406	0.154916	0.260006	0	0	0.439628
tr|Q8IFK8|Q8IFK8_PLAF7	Q8IFK8	PF3D7_0425900	Rifin OS=Plasmodium falciparum (isolate 3D7) OX=36329 GN=PF3D7_0425900 PE=4 SV=1	126.2	0	6	tr|Q8IFK8|Q8IFK8_PLAF7	4.74172e+06	3.17252e+06	3.07153e+06	5.68017e+06	3.25735e+06	3.95516e+06	3.17252e+06	3.95516e+06	0.255739	0.290205	0.318108	0.0555556	0	0.440223
tr|Q8ILN8|Q8ILN8_PLAF7	Q8ILN8	PF3D7_1421200	40S ribosomal protein S25 OS=Plasmodium falciparum (isolate 3D7) OX=36329 GN=PF3D7_1421200 PE=1 SV=2	629.54	0	11	tr|Q8ILN8|Q8ILN8_PLAF7	1.01079e+08	8.1018e+07	8.34111e+07	8.46105e+07	8.03049e+07	8.11978e+07	8.34111e+07	8.11978e+07	0.123804	0.0276991	-0.0387986	0.0222222	0.0222222	0.440443
tr|O77385|O77385_PLAF7	O77385	PF3D7_0317200	Cdc2-related protein kinase 4 OS=Plasmodium falciparum (isolate 3D7) OX=36329 GN=PF3D7_0317200 PE=4 SV=1	70.85	0.000852515	2	tr|O77385|O77385_PLAF7	742169	85908.4	81802.7	121450	92293.9	106101	85908.4	106101	1.25319	0.136798	0.304573	0.166667	0	0.440542
tr|Q8IJ74|Q8IJ74_PLAF7	Q8IJ74	PF3D7_1033400	Haloacid dehalogenase-like hydrolase OS=Plasmodium falciparum (isolate 3D7) OX=36329 GN=PF3D7_1033400 PE=1 SV=1	932.8	0	16	tr|Q8IJ74|Q8IJ74_PLAF7	1.42902e+08	1.29329e+08	1.38119e+08	1.23549e+08	1.24294e+08	1.38366e+08	1.38119e+08	1.24294e+08	0.05033	0.0648447	-0.152148	0	0	0.443137
tr|Q8IKC7|Q8IKC7_PLAF7	Q8IKC7	PF3D7_1471200	Inorganic anion exchanger, inorganic anion antiporter OS=Plasmodium falciparum (isolate 3D7) OX=36329 GN=PF3D7_1471200 PE=4 SV=1	245.71	0	7	tr|Q8IKC7|Q8IKC7_PLAF7	4.34075e+06	4.36388e+06	4.14299e+06	3.85156e+06	4.29319e+06	3.99267e+06	4.34075e+06	3.99267e+06	0.0283493	0.0557515	-0.120591	0	0	0.443838
tr|Q8I3R6|Q8I3R6_PLAF7	Q8I3R6	PF3D7_0519400	40S ribosomal protein S24 OS=Plasmodium falciparum (isolate 3D7) OX=36329 GN=PF3D7_0519400 PE=1 SV=1	732.84	0	12	tr|Q8I3R6|Q8I3R6_PLAF7	1.04064e+08	8.08325e+07	8.28087e+07	8.35727e+07	8.03349e+07	8.27759e+07	8.28087e+07	8.27759e+07	0.144338	0.0205172	-0.000571609	0.0350877	0.0526316	0.444097
tr|Q8II16|Q8II16_PLAF7	Q8II16	PF3D7_1134800	Coatomer subunit delta OS=Plasmodium falciparum (isolate 3D7) OX=36329 GN=PF3D7_1134800 PE=3 SV=1	137.98	0	5	tr|Q8II16|Q8II16_PLAF7	2.4547e+06	2.33924e+06	1.8449e+06	2.34784e+06	2.39417e+06	2.38639e+06	2.33924e+06	2.38639e+06	0.146376	0.0104425	0.02879	0	0	0.444443
tr|Q8I3H9|Q8I3H9_PLAF7	Q8I3H9	PF3D7_0528800	Nucleolar preribosomal GTPase, putative OS=Plasmodium falciparum (isolate 3D7) OX=36329 GN=PF3D7_0528800 PE=4 SV=1	95.56	0	5	tr|Q8I3H9|Q8I3H9_PLAF7	4.89155e+06	2.35273e+06	2.46059e+06	2.51537e+06	2.41947e+06	2.81328e+06	2.46059e+06	2.51537e+06	0.443797	0.0795132	0.0317648	0.0666667	0	0.446257
tr|C6KSW5|C6KSW5_PLAF7	C6KSW5	PF3D7_0612100	Eukaryotic translation initiation factor 3 subunit L OS=Plasmodium falciparum (isolate 3D7) OX=36329 GN=PF3D7_0612100 PE=3 SV=1	468.5	0	11	tr|C6KSW5|C6KSW5_PLAF7	2.40823e+07	1.7257e+07	1.85035e+07	1.55218e+07	1.84312e+07	2.00166e+07	1.85035e+07	1.84312e+07	0.182209	0.126719	-0.0056471	0	0	0.446605
tr|Q8I431|Q8I431_PLAF7	Q8I431	PF3D7_0507100	60S ribosomal protein L4 OS=Plasmodium falciparum (isolate 3D7) OX=36329 GN=PF3D7_0507100 PE=1 SV=1	2512.85	0	30	tr|Q8I431|Q8I431_PLAF7	6.85131e+08	6.24322e+08	6.07995e+08	6.74233e+08	6.03455e+08	5.01619e+08	6.24322e+08	6.03455e+08	0.0635993	0.146301	-0.049044	0.0363636	0.0121212	0.446827
tr|Q8IHU8|Q8IHU8_PLAF7	Q8IHU8	PF3D7_1141700	OTU domain-containing protein OS=Plasmodium falciparum (isolate 3D7) OX=36329 GN=PF3D7_1141700 PE=4 SV=1	50.61	0.000773994	3	tr|Q8IHU8|Q8IHU8_PLAF7	178841	365113	456113	324718	410569	407043	365113	407043	0.423984	0.127582	0.156839	0	0	0.44708
tr|Q8IIK1|Q8IIK1_PLAF7	Q8IIK1	PF3D7_1116500	Folate transporter 2 OS=Plasmodium falciparum (isolate 3D7) OX=36329 GN=PF3D7_1116500 PE=4 SV=1	71.6	0.000855432	2	tr|Q8IIK1|Q8IIK1_PLAF7	4.96114e+06	5.17635e+06	4.48246e+06	5.99933e+06	5.63947e+06	4.40244e+06	4.96114e+06	5.63947e+06	0.0728837	0.156653	0.184889	0	0	0.447558
tr|Q8I241|Q8I241_PLAF7	Q8I241	PF3D7_0110400	DNA-directed RNA polymerase II subunit RPB9,putative OS=Plasmodium falciparum (isolate 3D7) OX=36329 GN=PF3D7_0110400 PE=4 SV=1	70.65	0.00085034	3	tr|Q8I241|Q8I241_PLAF7	1.88518e+06	2.2528e+06	2.13138e+06	1.42263e+06	2.16435e+06	2.11744e+06	2.13138e+06	2.11744e+06	0.0896288	0.218436	-0.00946813	0	0	0.44794
tr|Q8IBY3|Q8IBY3_PLAF7	Q8IBY3	PF3D7_0710700	Uncharacterized protein OS=Plasmodium falciparum (isolate 3D7) OX=36329 GN=PF3D7_0710700 PE=4 SV=1	35.75	0.0055517	2	tr|Q8IBY3|Q8IBY3_PLAF7	620838	590696	588230	585788	586734	527510	590696	585788	0.0302648	0.0598631	-0.0120363	0	0	0.448535
tr|Q8IJK2|Q8IJK2_PLAF7	Q8IJK2	PF3D7_1019900	Autophagy-related protein OS=Plasmodium falciparum (isolate 3D7) OX=36329 GN=PF3D7_1019900 PE=1 SV=1	149.3	0	3	tr|Q8IJK2|Q8IJK2_PLAF7	992085	622488	542775	1.09371e+06	730979	682719	622488	730979	0.333374	0.268788	0.231785	0	0	0.448811
tr|A0A144A366|A0A144A366_PLAF7	A0A144A366	PF3D7_1412800	Glycylpeptide N-tetradecanoyltransferase OS=Plasmodium falciparum (isolate 3D7) OX=36329 GN=PF3D7_1412800 PE=3 SV=1	328.23	0	9	tr|A0A144A366|A0A144A366_PLAF7	9.87936e+06	9.106e+06	9.23431e+06	8.49372e+06	8.26778e+06	9.76228e+06	9.23431e+06	8.49372e+06	0.0440603	0.0911166	-0.120608	0	0	0.449088
tr|Q8IJP8|Q8IJP8_PLAF7	Q8IJP8	PF3D7_1014700	Prohibitin, putative OS=Plasmodium falciparum (isolate 3D7) OX=36329 GN=PF3D7_1014700 PE=4 SV=1	412.06	0	10	tr|Q8IJP8|Q8IJP8_PLAF7	6.6811e+06	3.59664e+06	3.80552e+06	5.07187e+06	5.32499e+06	5.15383e+06	3.80552e+06	5.15383e+06	0.367177	0.0249154	0.437553	0	0	0.449287
tr|Q8IIU8|Q8IIU8_PLAF7	Q8IIU8	PF3D7_1105400	40S ribosomal protein S4 OS=Plasmodium falciparum (isolate 3D7) OX=36329 GN=PF3D7_1105400 PE=1 SV=2	1822.2	0	24	tr|Q8IIU8|Q8IIU8_PLAF7	3.99013e+08	2.71622e+08	2.93846e+08	2.95952e+08	2.84762e+08	2.85828e+08	2.93846e+08	2.85828e+08	0.211659	0.0213803	-0.0399122	0.0378788	0.0151515	0.449618
tr|Q8IE84|Q8IE84_PLAF7	Q8IE84	PF3D7_1323200	V-type proton ATPase subunit G, putative OS=Plasmodium falciparum (isolate 3D7) OX=36329 GN=PF3D7_1323200 PE=4 SV=1	535.02	0	12	tr|Q8IE84|Q8IE84_PLAF7	2.29092e+07	3.40677e+07	3.12231e+07	2.33383e+07	3.13064e+07	2.37511e+07	3.12231e+07	2.37511e+07	0.197224	0.171665	-0.39462	0.0185185	0.037037	0.44963
tr|C0H469|C0H469_PLAF7	C0H469	PF3D7_0310300	Phosphoglycerate mutase, putative OS=Plasmodium falciparum (isolate 3D7) OX=36329 GN=PF3D7_0310300 PE=4 SV=1	172.35	0	7	tr|C0H469|C0H469_PLAF7	1.33164e+06	1.39536e+06	1.50686e+06	1.45993e+06	1.49575e+06	1.52334e+06	1.39536e+06	1.49575e+06	0.0628431	0.0212945	0.100234	0.047619	0.047619	0.449682
tr|Q9U0K3|Q9U0K3_PLAF7	Q9U0K3	PF3D7_0408300	Zinc finger, RAN binding protein, putative OS=Plasmodium falciparum (isolate 3D7) OX=36329 GN=PF3D7_0408300 PE=4 SV=2	74.1	0.000866551	2	tr|Q9U0K3|Q9U0K3_PLAF7	1.33911e+06	1.36385e+06	1.2656e+06	1.19157e+06	1.35622e+06	1.19223e+06	1.33911e+06	1.19223e+06	0.0386306	0.076099	-0.167608	0	0	0.450142
tr|Q8I4W4|Q8I4W4_PLAF7	Q8I4W4	PF3D7_1246800	Signal recognition particle receptor, beta subunit OS=Plasmodium falciparum (isolate 3D7) OX=36329 GN=PF3D7_1246800 PE=4 SV=1	424.86	0	9	tr|Q8I4W4|Q8I4W4_PLAF7	6.67069e+06	6.34797e+06	6.11522e+06	9.39069e+06	6.40488e+06	5.93493e+06	6.34797e+06	6.40488e+06	0.0437363	0.258757	0.012877	0.025641	0	0.452855
tr|Q9U0H7|Q9U0H7_PLAF7	Q9U0H7	PF3D7_0411100	Uncharacterized protein OS=Plasmodium falciparum (isolate 3D7) OX=36329 GN=PF3D7_0411100 PE=4 SV=1	70.99	0.000853971	2	tr|Q9U0H7|Q9U0H7_PLAF7	938500	687859	625525	1.02167e+06	746807	749715	687859	749715	0.220696	0.188065	0.12423	0	0	0.454326
sp|Q8IER7|RPB11_PLAF7	Q8IER7	PF13_0023	Probable DNA-directed RNA polymerase II subunit RPB11 OS=Plasmodium falciparum (isolate 3D7) OX=36329 GN=PF13_0023 PE=3 SV=1	185.61	0	5	sp|Q8IER7|RPB11_PLAF7	5.20347e+06	3.83893e+06	3.72023e+06	4.73912e+06	3.69568e+06	2.91255e+06	3.83893e+06	3.69568e+06	0.193743	0.242269	-0.0548642	0	0	0.454645
tr|Q8IC51|Q8IC51_PLAF7	Q8IC51	PF3D7_0701600	Pfmc-2TM Maurer's cleft two transmembrane protein OS=Plasmodium falciparum (isolate 3D7) OX=36329 GN=PF3D7_0701600 PE=4 SV=1	443.94	0	7	tr|Q8IC51|Q8IC51_PLAF7	7.4281e+07	6.65953e+07	5.37355e+07	8.71645e+07	6.80275e+07	6.13304e+07	6.65953e+07	6.80275e+07	0.160023	0.185758	0.0306972	0	0	0.456085
tr|Q8IEJ0|Q8IEJ0_PLAF7	Q8IEJ0	PF3D7_1301700	Uncharacterized protein OS=Plasmodium falciparum (isolate 3D7) OX=36329 GN=PF3D7_1301700 PE=4 SV=1	268.49	0	7	tr|Q8IEJ0|Q8IEJ0_PLAF7	2.89334e+07	1.77808e+07	1.62909e+07	2.67279e+07	2.00775e+07	2.35469e+07	1.77808e+07	2.35469e+07	0.32899	0.141839	0.40522	0	0	0.456731
tr|Q8I2Y5|Q8I2Y5_PLAF7	Q8I2Y5	PF3D7_0916700	RNA-binding protein musashi, putative OS=Plasmodium falciparum (isolate 3D7) OX=36329 GN=PF3D7_0916700 PE=4 SV=1	734.39	0	18	tr|Q8I2Y5|Q8I2Y5_PLAF7	5.12871e+07	3.9886e+07	4.34797e+07	4.0133e+07	4.21775e+07	4.25151e+07	4.34797e+07	4.21775e+07	0.129865	0.0309789	-0.0438689	0	0	0.456936
tr|Q8I3J6|Q8I3J6_PLAF7	Q8I3J6	PF3D7_0526900	Transmembrane emp24 domain-containing protein,putative OS=Plasmodium falciparum (isolate 3D7) OX=36329 GN=PF3D7_0526900 PE=3 SV=1	164.47	0	5	tr|Q8I3J6|Q8I3J6_PLAF7	4.38895e+06	3.58207e+06	3.42143e+06	3.88933e+06	4.06119e+06	4.23389e+06	3.58207e+06	4.06119e+06	0.136534	0.0424182	0.181106	0	0	0.457094
tr|Q8IIA9|Q8IIA9_PLAF7	Q8IIA9	PF3D7_1125400	Mitochondrial import inner membrane translocase subunit TIM44, putative OS=Plasmodium falciparum (isolate 3D7) OX=36329 GN=PF3D7_1125400 PE=4 SV=2	101.06	0	2	tr|Q8IIA9|Q8IIA9_PLAF7	935105	564532	539410	814648	655757	791765	564532	791765	0.325974	0.113911	0.488017	0	0	0.457487
tr|Q8IDY3|Q8IDY3_PLAF7	Q8IDY3	PF3D7_1334500	MSP7-like protein OS=Plasmodium falciparum (isolate 3D7) OX=36329 GN=PF3D7_1334500 PE=4 SV=2	651.93	0	16	tr|Q8IDY3|Q8IDY3_PLAF7	1.76923e+07	1.95284e+07	2.00124e+07	1.89248e+07	2.02668e+07	2.16821e+07	1.95284e+07	2.02668e+07	0.0641576	0.0679502	0.0535453	0	0	0.458741
tr|Q8IKG8|Q8IKG8_PLAF7	Q8IKG8	PF3D7_1466900	Rhoptry protein, putative OS=Plasmodium falciparum (isolate 3D7) OX=36329 GN=PF3D7_1466900 PE=4 SV=2	39.66	0.00357654	1	tr|Q8IKG8|Q8IKG8_PLAF7	432584	434947	358488	369564	394736	379181	432584	379181	0.106387	0.0333251	-0.190094	0	0	0.459322
tr|C6KT23|C6KT23_PLAF7	C6KT23	PF3D7_0618300	60S ribosomal protein L27a, putative OS=Plasmodium falciparum (isolate 3D7) OX=36329 GN=PF3D7_0618300 PE=1 SV=1	632.62	0	12	tr|C6KT23|C6KT23_PLAF7	1.39357e+08	9.10127e+07	9.28211e+07	1.05041e+08	8.79074e+07	9.22508e+07	9.28211e+07	9.22508e+07	0.254381	0.0936917	-0.0088908	0	0	0.459647
tr|Q8IEC3|Q8IEC3_PLAF7	Q8IEC3	PF3D7_1319300	N2,N2-dimethylguanosine tRNA methyltransferase,putative OS=Plasmodium falciparum (isolate 3D7) OX=36329 GN=PF3D7_1319300 PE=3 SV=1	408.74	0	12	tr|Q8IEC3|Q8IEC3_PLAF7	6.38706e+06	4.97892e+06	4.53423e+06	4.65494e+06	4.67656e+06	5.12999e+06	4.97892e+06	4.67656e+06	0.1825	0.0556478	-0.090384	0.128205	0.0769231	0.459733
tr|Q8IAL6|Q8IAL6_PLAF7	Q8IAL6	PF3D7_0801800	Mannose-6-phosphate isomerase, putative OS=Plasmodium falciparum (isolate 3D7) OX=36329 GN=PF3D7_0801800 PE=4 SV=1	716.94	0	24	tr|Q8IAL6|Q8IAL6_PLAF7	1.92612e+07	2.23841e+07	2.28403e+07	2.0408e+07	1.9693e+07	2.03726e+07	2.23841e+07	2.03726e+07	0.0906295	0.0199906	-0.135847	0.0229885	0.0229885	0.460268
tr|Q8I3J3|Q8I3J3_PLAF7	Q8I3J3	PF3D7_0527200	Ubiquitin carboxyl-terminal hydrolase OS=Plasmodium falciparum (isolate 3D7) OX=36329 GN=PF3D7_0527200 PE=3 SV=1	51.54	0.000776398	3	tr|Q8I3J3|Q8I3J3_PLAF7	861052	1.09754e+06	1.20198e+06	696529	899580	1.22076e+06	1.09754e+06	899580	0.165799	0.281511	-0.286947	0	0	0.460308
tr|Q8IM03|Q8IM03_PLAF7	Q8IM03	PF3D7_1409300	DNA damage-inducible protein 1, putative OS=Plasmodium falciparum (isolate 3D7) OX=36329 GN=PF3D7_1409300 PE=4 SV=1	70.44	0.000848896	2	tr|Q8IM03|Q8IM03_PLAF7	1.88937e+06	3.07566e+06	2.37468e+06	1.29653e+06	2.52412e+06	2.49855e+06	2.37468e+06	2.49855e+06	0.243771	0.333027	0.0733576	0	0	0.461087
tr|Q8IIA2|Q8IIA2_PLAF7	Q8IIA2	PF3D7_1126200	40S ribosomal protein S18, putative OS=Plasmodium falciparum (isolate 3D7) OX=36329 GN=PF3D7_1126200 PE=1 SV=1	1276.35	0	14	tr|Q8IIA2|Q8IIA2_PLAF7	4.11818e+08	3.32934e+08	3.37949e+08	3.35311e+08	3.21021e+08	3.50846e+08	3.37949e+08	3.35311e+08	0.122381	0.0444312	-0.0113086	0.0707071	0.0707071	0.464456
tr|Q8IC28|Q8IC28_PLAF7	Q8IC28	PF3D7_0704200	tRNA m5C-methyltransferase, putative OS=Plasmodium falciparum (isolate 3D7) OX=36329 GN=PF3D7_0704200 PE=3 SV=1	184.49	0	6	tr|Q8IC28|Q8IC28_PLAF7	1.49423e+06	2.02532e+06	1.95118e+06	1.65168e+06	1.97842e+06	1.29906e+06	1.95118e+06	1.65168e+06	0.157724	0.206785	-0.240413	0	0	0.465116
tr|Q8IKH5|Q8IKH5_PLAF7	Q8IKH5	PF3D7_1466100	Serine/threonine-protein phosphatase OS=Plasmodium falciparum (isolate 3D7) OX=36329 GN=PF3D7_1466100 PE=3 SV=1	102.25	0	4	tr|Q8IKH5|Q8IKH5_PLAF7	959626	609704	623755	671795	572624	680125	623755	671795	0.270983	0.0932266	0.107042	0.25	0.166667	0.46726
tr|O97253|O97253_PLAF7	O97253	PF3D7_0307500	SKA2 domain-containing protein OS=Plasmodium falciparum (isolate 3D7) OX=36329 GN=PF3D7_0307500 PE=4 SV=2	177.65	0	4	tr|O97253|O97253_PLAF7	2.52053e+06	1.67783e+06	1.84457e+06	1.67196e+06	2.06532e+06	1.66204e+06	1.84457e+06	1.67196e+06	0.221543	0.127806	-0.141745	0	0.0666667	0.467517
tr|Q8IBA0|Q8IBA0_PLAF7	Q8IBA0	PF3D7_0826700	Receptor for activated c kinase OS=Plasmodium falciparum (isolate 3D7) OX=36329 GN=PF3D7_0826700 PE=4 SV=1	1729.56	0	23	tr|Q8IBA0|Q8IBA0_PLAF7	5.8375e+08	4.74019e+08	5.12216e+08	5.02582e+08	4.61699e+08	5.02474e+08	5.12216e+08	5.02474e+08	0.106439	0.048214	-0.0277039	0	0	0.467671
tr|Q8I5Y7|Q8I5Y7_PLAF7	Q8I5Y7	PF3D7_1205800	High mobility group protein B3, putative OS=Plasmodium falciparum (isolate 3D7) OX=36329 GN=PF3D7_1205800 PE=4 SV=1	90.97	0	3	tr|Q8I5Y7|Q8I5Y7_PLAF7	945061	970684	801791	891832	1.11046e+06	930553	945061	930553	0.10048	0.119336	-0.0223186	0	0	0.467882
tr|Q8IEM5|Q8IEM5_PLAF7	Q8IEM5	PF3D7_1308900	mRNA-decapping enzyme 2, putative OS=Plasmodium falciparum (isolate 3D7) OX=36329 GN=PF3D7_1308900 PE=4 SV=1	38.09	0.00424028	2	tr|Q8IEM5|Q8IEM5_PLAF7	91516.1	484509	329919	247760	414925	388827	329919	388827	0.655605	0.256575	0.237015	0	0	0.469543
tr|Q8IIC4|Q8IIC4_PLAF7	Q8IIC4	PF3D7_1123900	Ribonucloprotein OS=Plasmodium falciparum (isolate 3D7) OX=36329 GN=PF3D7_1123900 PE=3 SV=1	275.32	0	5	tr|Q8IIC4|Q8IIC4_PLAF7	6.63308e+06	1.9325e+07	2.30569e+07	2.27331e+07	1.83548e+07	1.53819e+07	1.9325e+07	1.83548e+07	0.526959	0.196456	-0.0743056	0	0	0.469578
tr|Q8IKH8|Q8IKH8_PLAF7	Q8IKH8	PF3D7_1465900	40S ribosomal protein S3 OS=Plasmodium falciparum (isolate 3D7) OX=36329 GN=PF3D7_1465900 PE=1 SV=1	1786.13	0	23	tr|Q8IKH8|Q8IKH8_PLAF7	5.2952e+08	3.91509e+08	3.94142e+08	4.17519e+08	3.96763e+08	3.87204e+08	3.94142e+08	3.96763e+08	0.180049	0.0386972	0.00956488	0.0148148	0.00740741	0.469763
tr|Q8II60|Q8II60_PLAF7	Q8II60	PF3D7_1130400	26S protease regulatory subunit 6A, putative OS=Plasmodium falciparum (isolate 3D7) OX=36329 GN=PF3D7_1130400 PE=3 SV=1	1287.69	0	27	tr|Q8II60|Q8II60_PLAF7	5.63511e+07	6.07854e+07	6.42811e+07	5.2543e+07	5.92325e+07	5.90701e+07	6.07854e+07	5.90701e+07	0.0657205	0.0670108	-0.0412964	0.00925926	0.0185185	0.469848
tr|C0H5L9|C0H5L9_PLAF7	C0H5L9	PF3D7_1370300	Membrane associated histidine-rich protein OS=Plasmodium falciparum (isolate 3D7) OX=36329 GN=PF3D7_1370300 PE=4 SV=1	690.3	0	12	tr|C0H5L9|C0H5L9_PLAF7	2.64682e+08	1.61928e+08	1.60189e+08	2.68903e+08	2.1088e+08	1.81553e+08	1.61928e+08	2.1088e+08	0.305898	0.201655	0.381069	0.0533333	0.0533333	0.470583
tr|Q8I3N3|Q8I3N3_PLAF7	Q8I3N3	PF3D7_0523100	Mitochondrial processing peptidase alpha subunit, putative OS=Plasmodium falciparum (isolate 3D7) OX=36329 GN=PF3D7_0523100 PE=4 SV=2	532.19	0	11	tr|Q8I3N3|Q8I3N3_PLAF7	1.10539e+07	7.84452e+06	9.5479e+06	1.06203e+07	1.03206e+07	9.62511e+06	9.5479e+06	1.03206e+07	0.16934	0.05011	0.112273	0	0	0.473292
tr|Q8I301|Q8I301_PLAF7	Q8I301	PF3D7_0915100	SUMO-conjugating enzyme UBC9 OS=Plasmodium falciparum (isolate 3D7) OX=36329 GN=PF3D7_0915100 PE=1 SV=1	191.79	0	5	tr|Q8I301|Q8I301_PLAF7	3.55537e+06	5.34123e+06	5.2429e+06	3.67754e+06	4.59474e+06	4.31668e+06	5.2429e+06	4.31668e+06	0.212996	0.112073	-0.280443	0	0	0.475492
tr|Q8I207|Q8I207_PLAF7	Q8I207	PF3D7_0401800	PRESAN domain-containing protein OS=Plasmodium falciparum (isolate 3D7) OX=36329 GN=PF3D7_0401800 PE=4 SV=1	1563.62	0	29	tr|Q8I207|Q8I207_PLAF7	1.77149e+08	1.24132e+08	1.2546e+08	1.92742e+08	1.45413e+08	1.36463e+08	1.2546e+08	1.45413e+08	0.212539	0.191158	0.212926	0.0396825	0.0634921	0.475625
tr|Q8IIN1|Q8IIN1_PLAF7	Q8IIN1	PF3D7_1113100	Protein tyrosine phosphatase OS=Plasmodium falciparum (isolate 3D7) OX=36329 GN=PF3D7_1113100 PE=4 SV=1	36.43	0.0055905	2	tr|Q8IIN1|Q8IIN1_PLAF7	668902	826512	827669	716761	808276	620029	826512	716761	0.117945	0.131654	-0.205543	0.5	0.166667	0.475784
tr|Q8IBQ0|Q8IBQ0_PLAF7	Q8IBQ0	PF3D7_0720200	Uncharacterized protein OS=Plasmodium falciparum (isolate 3D7) OX=36329 GN=PF3D7_0720200 PE=4 SV=1	74.5	0.000868056	2	tr|Q8IBQ0|Q8IBQ0_PLAF7	343817	797874	1.03052e+06	562976	887149	1.19574e+06	797874	887149	0.482341	0.358766	0.153015	0	0	0.476887
tr|Q8I4S6|Q8I4S6_PLAF7	Q8I4S6	PF3D7_1250800	DNA repair protein rhp16, putative OS=Plasmodium falciparum (isolate 3D7) OX=36329 GN=PF3D7_1250800 PE=4 SV=1	31.83	0.00940228	1	tr|Q8I4S6|Q8I4S6_PLAF7	1771.24	34771.5	53211.9	33104.9	80509.1	11501.6	34771.5	33104.9	0.871091	0.846381	-0.0708634	0	0	0.477087
tr|Q8I512|Q8I512_PLAF7	Q8I512	PF3D7_1241700	Replication factor C subunit 4, putative OS=Plasmodium falciparum (isolate 3D7) OX=36329 GN=PF3D7_1241700 PE=4 SV=1	708.06	0	15	tr|Q8I512|Q8I512_PLAF7	2.14763e+07	1.73244e+07	1.78367e+07	2.11977e+07	1.88118e+07	2.03636e+07	1.78367e+07	2.03636e+07	0.119905	0.0601677	0.19114	0	0	0.477384
tr|Q8IEK4|Q8IEK4_PLAF7	Q8IEK4	PF3D7_1311400	AP-1 complex subunit mu-1 OS=Plasmodium falciparum (isolate 3D7) OX=36329 GN=PF3D7_1311400 PE=3 SV=1	165.05	0	5	tr|Q8IEK4|Q8IEK4_PLAF7	2.1088e+06	2.07893e+06	2.16238e+06	1.60414e+06	2.04224e+06	2.27552e+06	2.1088e+06	2.04224e+06	0.0199747	0.172676	-0.0462704	0	0	0.477926
tr|Q8IDN4|Q8IDN4_PLAF7	Q8IDN4	PF3D7_1346300	DNA/RNA-binding protein Alba 2 OS=Plasmodium falciparum (isolate 3D7) OX=36329 GN=PF3D7_1346300 PE=4 SV=1	554.95	0	10	tr|Q8IDN4|Q8IDN4_PLAF7	1.2866e+08	1.10516e+08	1.06385e+08	1.09959e+08	1.05727e+08	1.08513e+08	1.10516e+08	1.08513e+08	0.102869	0.0199031	-0.0263913	0.0185185	0.0555556	0.478008
tr|Q8IL00|Q8IL00_PLAF7	Q8IL00	PF3D7_1447200	Uncharacterized protein OS=Plasmodium falciparum (isolate 3D7) OX=36329 GN=PF3D7_1447200 PE=4 SV=1	62.85	0.000824402	1	tr|Q8IL00|Q8IL00_PLAF7	2282.06	17664	68445.8	17020.9	47034.1	23185.4	17664	23185.4	1.17514	0.545085	0.392405	0	0	0.478396
tr|A0A143ZWE8|A0A143ZWE8_PLAF7	A0A143ZWE8	PF3D7_0203700	Protein MAK16, putative OS=Plasmodium falciparum (isolate 3D7) OX=36329 GN=PF3D7_0203700 PE=4 SV=1	145.96	0	3	tr|A0A143ZWE8|A0A143ZWE8_PLAF7	1.58137e+06	1.3788e+06	1.39902e+06	1.51964e+06	1.47237e+06	1.62164e+06	1.39902e+06	1.51964e+06	0.0767857	0.0496072	0.119307	0	0	0.478888
tr|C0H586|C0H586_PLAF7	C0H586	PF3D7_0933200	Calcyclin binding protein, putative OS=Plasmodium falciparum (isolate 3D7) OX=36329 GN=PF3D7_0933200 PE=4 SV=2	58.72	0.00081103	3	tr|C0H586|C0H586_PLAF7	900426	1.02433e+06	963419	907516	997334	807922	963419	907516	0.0643524	0.10478	-0.086241	0	0	0.480108
tr|Q8IL40|Q8IL40_PLAF7	Q8IL40	PF3D7_1443100	Uncharacterized protein OS=Plasmodium falciparum (isolate 3D7) OX=36329 GN=PF3D7_1443100 PE=4 SV=1	118.42	0	3	tr|Q8IL40|Q8IL40_PLAF7	163226	1.43397e+06	1.12993e+06	630645	1.40741e+06	1.14021e+06	1.12993e+06	1.14021e+06	0.729938	0.372499	0.0130558	0	0	0.480438
tr|C6KSM2|C6KSM2_PLAF7	C6KSM2	PF3D7_0602200	MYND finger protein, putative OS=Plasmodium falciparum (isolate 3D7) OX=36329 GN=PF3D7_0602200 PE=4 SV=1	478.4	0	13	tr|C6KSM2|C6KSM2_PLAF7	1.55055e+07	1.7535e+07	1.545e+07	1.33935e+07	1.5253e+07	1.68038e+07	1.55055e+07	1.5253e+07	0.0735023	0.112705	-0.0236877	0.0238095	0.0714286	0.482349
tr|Q8I5B3|Q8I5B3_PLAF7	Q8I5B3	PF3D7_1230700	Protein transport protein SEC13 OS=Plasmodium falciparum (isolate 3D7) OX=36329 GN=PF3D7_1230700 PE=3 SV=1	251.12	0	8	tr|Q8I5B3|Q8I5B3_PLAF7	5.33095e+06	8.26459e+06	6.69688e+06	5.78382e+06	6.63366e+06	5.79027e+06	6.69688e+06	5.79027e+06	0.217023	0.0805384	-0.209859	0	0	0.482975
tr|O77395|O77395_PLAF7	O77395	PF3D7_0316800	40S ribosomal protein S15A, putative OS=Plasmodium falciparum (isolate 3D7) OX=36329 GN=PF3D7_0316800 PE=1 SV=1	1102.22	0	16	tr|O77395|O77395_PLAF7	9.99277e+07	8.55018e+07	8.16902e+07	8.17482e+07	7.99048e+07	8.84376e+07	8.55018e+07	8.17482e+07	0.108039	0.0538594	-0.0647694	0.0666667	0.0266667	0.484532
tr|C0H4F3|C0H4F3_PLAF7	C0H4F3	PF3D7_0520600	Bis(5'-nucleosyl)-tetraphosphatase [asymmetrical] OS=Plasmodium falciparum (isolate 3D7) OX=36329 GN=PF3D7_0520600 PE=1 SV=1	139.65	0	4	tr|C0H4F3|C0H4F3_PLAF7	5.35848e+06	4.23726e+06	4.58496e+06	4.01452e+06	4.05964e+06	5.05672e+06	4.58496e+06	4.05964e+06	0.121417	0.134596	-0.175557	0	0	0.484672
tr|Q8I3T9|Q8I3T9_PLAF7	Q8I3T9	PF3D7_0516900	60S ribosomal protein L2 OS=Plasmodium falciparum (isolate 3D7) OX=36329 GN=PF3D7_0516900 PE=1 SV=1	1279.11	0	14	tr|Q8I3T9|Q8I3T9_PLAF7	2.67853e+08	1.77436e+08	1.72336e+08	2.17737e+08	1.62963e+08	1.64237e+08	1.77436e+08	1.64237e+08	0.261008	0.172106	-0.111515	0.0444444	0.0555556	0.486443
tr|Q8I3T8|Q8I3T8_PLAF7	Q8I3T8	PF3D7_0517000	60S ribosomal protein L12, putative OS=Plasmodium falciparum (isolate 3D7) OX=36329 GN=PF3D7_0517000 PE=3 SV=2	1169	0	16	tr|Q8I3T8|Q8I3T8_PLAF7	2.9636e+08	2.48413e+08	2.33026e+08	2.55512e+08	2.37948e+08	2.31028e+08	2.48413e+08	2.37948e+08	0.127407	0.0522651	-0.0620911	0.0537634	0.0752688	0.486513
tr|Q8I2R8|Q8I2R8_PLAF7	Q8I2R8	PF3D7_0923900	RNA-binding protein, putative OS=Plasmodium falciparum (isolate 3D7) OX=36329 GN=PF3D7_0923900 PE=4 SV=1	437.69	0	11	tr|Q8I2R8|Q8I2R8_PLAF7	8.56332e+07	8.03199e+07	7.94373e+07	7.69559e+07	8.28713e+07	7.28381e+07	8.03199e+07	7.69559e+07	0.0409742	0.0650289	-0.0617251	0	0	0.488422
tr|C6KT04|C6KT04_PLAF7	C6KT04	PF3D7_0616300	Uncharacterized protein OS=Plasmodium falciparum (isolate 3D7) OX=36329 GN=PF3D7_0616300 PE=4 SV=1	107.7	0	2	tr|C6KT04|C6KT04_PLAF7	299720	324072	347253	299617	352070	397532	324072	352070	0.0734331	0.140102	0.119549	0.111111	0.333333	0.488948
tr|Q8IDW3|Q8IDW3_PLAF7	Q8IDW3	PF3D7_1336900	Tryptophan--tRNA ligase OS=Plasmodium falciparum (isolate 3D7) OX=36329 GN=PF3D7_1336900 PE=1 SV=1	429.61	0	15	tr|Q8IDW3|Q8IDW3_PLAF7	1.09424e+07	1.23935e+07	1.17704e+07	1.14211e+07	1.0551e+07	1.12693e+07	1.17704e+07	1.12693e+07	0.0622042	0.0419445	-0.062769	0.0208333	0	0.489045
tr|Q8IJT9|Q8IJT9_PLAF7	Q8IJT9	PF3D7_1010600	Eukaryotic translation initiation factor 2 subunit beta, putative OS=Plasmodium falciparum (isolate 3D7) OX=36329 GN=PF3D7_1010600 PE=4 SV=1	883.93	0	20	tr|Q8IJT9|Q8IJT9_PLAF7	6.99462e+07	5.97141e+07	5.73846e+07	5.63274e+07	5.67744e+07	6.21723e+07	5.97141e+07	5.67744e+07	0.107176	0.0556818	-0.0728314	0.047619	0.047619	0.489359
tr|Q7KWJ4|Q7KWJ4_PLAF7	Q7KWJ4	PF3D7_0206700	Adenylosuccinate lyase OS=Plasmodium falciparum (isolate 3D7) OX=36329 GN=PF3D7_0206700 PE=3 SV=1	356.9	0	10	tr|Q7KWJ4|Q7KWJ4_PLAF7	6.03857e+06	6.02707e+06	6.0283e+06	5.02031e+06	6.18108e+06	5.9003e+06	6.0283e+06	5.9003e+06	0.00104699	0.106237	-0.0309632	0.030303	0	0.489393
tr|Q8I226|Q8I226_PLAF7	Q8I226	PF3D7_0112000	TatD-like deoxyribonuclease, putative OS=Plasmodium falciparum (isolate 3D7) OX=36329 GN=PF3D7_0112000 PE=4 SV=2	92.75	0	4	tr|Q8I226|Q8I226_PLAF7	3.08834e+06	2.7518e+06	3.1495e+06	2.60967e+06	2.81819e+06	3.04351e+06	3.08834e+06	2.81819e+06	0.0714658	0.0768376	-0.132063	0.0833333	0	0.489533
tr|Q8IK02|Q8IK02_PLAF7	Q8IK02	PF3D7_1003500	40S ribosomal protein S20e, putative OS=Plasmodium falciparum (isolate 3D7) OX=36329 GN=PF3D7_1003500 PE=1 SV=1	438.99	0	9	tr|Q8IK02|Q8IK02_PLAF7	5.75001e+07	4.86513e+07	5.01426e+07	5.32899e+07	4.66815e+07	4.68801e+07	5.01426e+07	4.68801e+07	0.0909319	0.0767993	-0.0970591	0.047619	0.047619	0.491951
tr|Q8I5S7|Q8I5S7_PLAF7	Q8I5S7	PF3D7_1212500	Glycerol-3-phosphate 1-O-acyltransferase OS=Plasmodium falciparum (isolate 3D7) OX=36329 GN=PF3D7_1212500 PE=4 SV=1	415.3	0	8	tr|Q8I5S7|Q8I5S7_PLAF7	2.77361e+06	2.80579e+06	2.69319e+06	3.39713e+06	2.96646e+06	2.55128e+06	2.77361e+06	2.96646e+06	0.0210309	0.142328	0.096974	0	0	0.492609
tr|Q8I3Y0|Q8I3Y0_PLAF7	Q8I3Y0	PF3D7_0512700	Orotate phosphoribosyltransferase OS=Plasmodium falciparum (isolate 3D7) OX=36329 GN=PF3D7_0512700 PE=3 SV=1	198.72	0	6	tr|Q8I3Y0|Q8I3Y0_PLAF7	7.14056e+06	6.37528e+06	7.86922e+06	5.89162e+06	5.74908e+06	8.11805e+06	7.14056e+06	5.89162e+06	0.104799	0.201707	-0.277372	0	0	0.493955
tr|Q8IJX8|Q8IJX8_PLAF7	Q8IJX8	PF3D7_1006200	DNA/RNA-binding protein Alba 3 OS=Plasmodium falciparum (isolate 3D7) OX=36329 GN=PF3D7_1006200 PE=4 SV=1	1103.64	0	14	tr|Q8IJX8|Q8IJX8_PLAF7	9.90488e+08	7.12059e+08	7.14165e+08	7.00075e+08	7.29213e+08	7.7284e+08	7.14165e+08	7.29213e+08	0.198799	0.0498909	0.0300833	0.0111111	0	0.494441
tr|Q8IE09|Q8IE09_PLAF7	Q8IE09	PF3D7_1331800	60S ribosomal protein L23, putative OS=Plasmodium falciparum (isolate 3D7) OX=36329 GN=PF3D7_1331800 PE=1 SV=1	726.56	0	9	tr|Q8IE09|Q8IE09_PLAF7	1.6354e+08	1.06854e+08	9.59147e+07	1.10217e+08	9.993e+07	1.10044e+08	1.06854e+08	1.10044e+08	0.29729	0.0551853	0.042449	0.111111	0.12963	0.496044
tr|Q8I567|Q8I567_PLAF7	Q8I567	PF3D7_1235500	mRNA methyltransferase, putative OS=Plasmodium falciparum (isolate 3D7) OX=36329 GN=PF3D7_1235500 PE=3 SV=1	103.54	0	3	tr|Q8I567|Q8I567_PLAF7	2.14881e+06	2.14986e+06	2.0599e+06	1.81092e+06	1.90565e+06	2.28462e+06	2.14881e+06	1.90565e+06	0.0243639	0.125305	-0.173254	0	0	0.496258
tr|Q8II11|Q8II11_PLAF7	Q8II11	PF3D7_1135400	Uncharacterized protein OS=Plasmodium falciparum (isolate 3D7) OX=36329 GN=PF3D7_1135400 PE=4 SV=1	34.44	0.00686813	2	tr|Q8II11|Q8II11_PLAF7	2.09776e+06	1.93233e+06	1.80422e+06	1.24445e+06	1.9583e+06	2.14649e+06	1.93233e+06	1.9583e+06	0.0756721	0.266876	0.0192628	0	0	0.498296
tr|Q8I6Z1|Q8I6Z1_PLAF7	Q8I6Z1	PF3D7_0731600	Acyl-CoA synthetase OS=Plasmodium falciparum (isolate 3D7) OX=36329 GN=PF3D7_0731600 PE=4 SV=1	587.3	0	18	tr|Q8I6Z1|Q8I6Z1_PLAF7	1.46313e+07	1.62053e+07	1.64918e+07	1.57534e+07	1.66957e+07	1.7478e+07	1.62053e+07	1.66957e+07	0.0634986	0.0518872	0.0430172	0	0.0166667	0.498438
tr|O77314|O77314_PLAF7	O77314	PF3D7_0303100	CLP1_P domain-containing protein OS=Plasmodium falciparum (isolate 3D7) OX=36329 GN=PF3D7_0303100 PE=4 SV=1	36.34	0.00558269	1	tr|O77314|O77314_PLAF7	51139.8	69516.8	48414.7	60983	50418.7	77436.8	51139.8	60983	0.203662	0.216306	0.253961	0	0	0.49871
tr|Q8IJP5|Q8IJP5_PLAF7	Q8IJP5	PF3D7_1015000	FAD synthetase, putative OS=Plasmodium falciparum (isolate 3D7) OX=36329 GN=PF3D7_1015000 PE=4 SV=1	109.41	0	1	tr|Q8IJP5|Q8IJP5_PLAF7	22361.1	126232	172283	103797	107405	134776	126232	107405	0.718003	0.146895	-0.23302	0	0	0.499574
tr|Q8IDW0|Q8IDW0_PLAF7	Q8IDW0	PF3D7_1337200	1-deoxy-D-xylulose 5-phosphate synthase OS=Plasmodium falciparum (isolate 3D7) OX=36329 GN=PF3D7_1337200 PE=4 SV=1	121.3	0	3	tr|Q8IDW0|Q8IDW0_PLAF7	644159	671361	900891	586865	933579	1.04529e+06	671361	933579	0.190888	0.279499	0.475682	0.111111	0.333333	0.49963
tr|A0A144A0U2|A0A144A0U2_PLAF7	A0A144A0U2	PF3D7_0219200	40S ribosomal protein S30 OS=Plasmodium falciparum (isolate 3D7) OX=36329 GN=PF3D7_0219200 PE=3 SV=1	104.64	0	3	tr|A0A144A0U2|A0A144A0U2_PLAF7	3.64962e+06	3.97259e+06	3.84952e+06	3.09064e+06	3.69411e+06	4.01366e+06	3.84952e+06	3.69411e+06	0.0426278	0.130223	-0.0594548	0	0	0.500507
tr|Q8IKH3|Q8IKH3_PLAF7	Q8IKH3	PF3D7_1466300	26S proteasome regulatory subunit RPN2,putative OS=Plasmodium falciparum (isolate 3D7) OX=36329 GN=PF3D7_1466300 PE=3 SV=1	805.13	0	19	tr|Q8IKH3|Q8IKH3_PLAF7	1.95562e+07	2.23173e+07	2.21582e+07	1.89256e+07	2.02521e+07	2.13334e+07	2.21582e+07	2.02521e+07	0.0726306	0.059788	-0.129771	0.0151515	0.030303	0.500627
tr|O96220|O96220_PLAF7	O96220	PF3D7_0214000	T-complex protein 1 subunit theta OS=Plasmodium falciparum (isolate 3D7) OX=36329 GN=PF3D7_0214000 PE=3 SV=3	1366.76	0	29	tr|O96220|O96220_PLAF7	9.49739e+07	8.42171e+07	9.08377e+07	8.58793e+07	7.67123e+07	9.23752e+07	9.08377e+07	8.58793e+07	0.0602825	0.092592	-0.0809812	0.00854701	0.00854701	0.501531
tr|Q8IAX6|Q8IAX6_PLAF7	Q8IAX6	PF3D7_0814000	60S ribosomal protein L13 OS=Plasmodium falciparum (isolate 3D7) OX=36329 GN=PF3D7_0814000 PE=1 SV=1	1667.77	0	23	tr|Q8IAX6|Q8IAX6_PLAF7	2.48466e+08	1.94997e+08	1.95879e+08	2.22482e+08	1.89494e+08	1.79759e+08	1.95879e+08	1.89494e+08	0.143672	0.113523	-0.0478168	0.0507246	0.057971	0.501779
tr|Q8IKM5|Q8IKM5_PLAF7	Q8IKM5	PF3D7_1460700	60S ribosomal protein L27 OS=Plasmodium falciparum (isolate 3D7) OX=36329 GN=PF3D7_1460700 PE=1 SV=2	729.49	0	13	tr|Q8IKM5|Q8IKM5_PLAF7	1.84442e+08	1.33367e+08	1.4101e+08	1.51284e+08	1.34597e+08	1.3525e+08	1.4101e+08	1.3525e+08	0.180124	0.0673302	-0.0601758	0.031746	0.015873	0.502874
tr|Q8IIJ6|Q8IIJ6_PLAF7	Q8IIJ6	PF3D7_1117100	Deubiquinating/deneddylating enzyme OS=Plasmodium falciparum (isolate 3D7) OX=36329 GN=PF3D7_1117100 PE=4 SV=1	201.85	0	7	tr|Q8IIJ6|Q8IIJ6_PLAF7	4.31436e+06	4.45469e+06	4.61279e+06	3.74091e+06	4.25514e+06	4.65755e+06	4.45469e+06	4.25514e+06	0.033472	0.10893	-0.0661179	0	0	0.503055
tr|A0A143ZWU2|A0A143ZWU2_PLAF7	A0A143ZWU2	PF3D7_1016300	Glycophorin binding protein OS=Plasmodium falciparum (isolate 3D7) OX=36329 GN=PF3D7_1016300 PE=4 SV=1	581.25	0	11	tr|A0A143ZWU2|A0A143ZWU2_PLAF7	3.82602e+07	3.59277e+07	3.5264e+07	3.80172e+07	3.60536e+07	2.87882e+07	3.59277e+07	3.60536e+07	0.043133	0.141796	0.00504878	0.0222222	0	0.503133
tr|Q8IBN5|Q8IBN5_PLAF7	Q8IBN5	PF3D7_0721600	40S ribosomal protein S5, putative OS=Plasmodium falciparum (isolate 3D7) OX=36329 GN=PF3D7_0721600 PE=1 SV=1	814.91	0	12	tr|Q8IBN5|Q8IBN5_PLAF7	1.66425e+08	9.59163e+07	8.3464e+07	1.16204e+08	8.57754e+07	8.73487e+07	9.59163e+07	8.73487e+07	0.388122	0.177639	-0.134989	0.015873	0.015873	0.503264
tr|O77369|O77369_PLAF7	O77369	PF3D7_0318900	Uncharacterized protein OS=Plasmodium falciparum (isolate 3D7) OX=36329 GN=PF3D7_0318900 PE=4 SV=2	135.87	0	4	tr|O77369|O77369_PLAF7	1.02864e+06	1.16255e+06	934302	1.1537e+06	984408	1.20823e+06	1.02864e+06	1.1537e+06	0.11009	0.104632	0.165538	0.166667	0.25	0.503267
tr|Q8I377|Q8I377_PLAF7	Q8I377	PF3D7_0907400	ATP-dependent protease ATPase subunit ClpY OS=Plasmodium falciparum (isolate 3D7) OX=36329 GN=PF3D7_0907400 PE=4 SV=1	686.29	0	15	tr|Q8I377|Q8I377_PLAF7	8.01709e+06	6.40535e+06	6.32198e+06	8.9205e+06	7.24009e+06	6.46327e+06	6.40535e+06	7.24009e+06	0.138184	0.16655	0.17673	0	0	0.503444
tr|Q8I3R2|Q8I3R2_PLAF7	Q8I3R2	PF3D7_0519800	ELM2 domain-containing protein OS=Plasmodium falciparum (isolate 3D7) OX=36329 GN=PF3D7_0519800 PE=4 SV=1	256.45	0	5	tr|Q8I3R2|Q8I3R2_PLAF7	3.72421e+06	3.75251e+06	3.55755e+06	4.37973e+06	3.98966e+06	3.4282e+06	3.72421e+06	3.98966e+06	0.0286415	0.121635	0.0993299	0	0.111111	0.503663
tr|Q8ILB6|Q8ILB6_PLAF7	Q8ILB6	PF3D7_1434800	Mitochondrial acidic protein MAM33, putative OS=Plasmodium falciparum (isolate 3D7) OX=36329 GN=PF3D7_1434800 PE=4 SV=1	262.76	0	8	tr|Q8ILB6|Q8ILB6_PLAF7	5.00052e+07	5.33178e+07	4.73387e+07	5.60239e+07	5.46013e+07	4.87264e+07	5.00052e+07	5.46013e+07	0.0596443	0.0728297	0.126857	0	0	0.503828
tr|C6S3D1|C6S3D1_PLAF7	C6S3D1	PF3D7_1018500	PHF5-like protein, putative OS=Plasmodium falciparum (isolate 3D7) OX=36329 GN=PF3D7_1018500 PE=4 SV=1	139.2	0	5	tr|C6S3D1|C6S3D1_PLAF7	6.42724e+06	6.89347e+06	7.20782e+06	6.47712e+06	5.96813e+06	6.98611e+06	6.89347e+06	6.47712e+06	0.0573943	0.0785829	-0.0898761	0	0	0.504119
tr|Q8IIG2|Q8IIG2_PLAF7	Q8IIG2	PF3D7_1120500	tRNA nucleotidyltransferase, putative OS=Plasmodium falciparum (isolate 3D7) OX=36329 GN=PF3D7_1120500 PE=3 SV=1	95.91	0	3	tr|Q8IIG2|Q8IIG2_PLAF7	1.57482e+06	1.65051e+06	1.81548e+06	1.31432e+06	1.48185e+06	1.90093e+06	1.65051e+06	1.48185e+06	0.0732374	0.192987	-0.155512	0	0	0.505086
tr|Q8I0U7|Q8I0U7_PLAF7	Q8I0U7	PF3D7_0931800	Proteasome subunit beta type-6, putative OS=Plasmodium falciparum (isolate 3D7) OX=36329 GN=PF3D7_0931800 PE=1 SV=1	368.25	0	10	tr|Q8I0U7|Q8I0U7_PLAF7	1.42017e+07	1.44898e+07	1.44083e+07	1.32294e+07	1.2735e+07	1.49905e+07	1.44083e+07	1.32294e+07	0.0103372	0.0868424	-0.123149	0	0	0.505958
tr|Q8IIT3|Q8IIT3_PLAF7	Q8IIT3	LSM4	U6 snRNA-associated Sm-like protein LSm4 OS=Plasmodium falciparum (isolate 3D7) OX=36329 GN=LSM4 PE=3 SV=2	103.25	0	3	tr|Q8IIT3|Q8IIT3_PLAF7	7.47406e+06	6.55041e+06	6.86705e+06	5.89555e+06	6.63826e+06	7.17419e+06	6.86705e+06	6.63826e+06	0.067401	0.097742	-0.048886	0	0	0.506182
tr|Q8IJ11|Q8IJ11_PLAF7	Q8IJ11	PF3D7_1039700	Pfmc-2TM Maurer's cleft two transmembrane protein OS=Plasmodium falciparum (isolate 3D7) OX=36329 GN=PF3D7_1039700 PE=4 SV=2	887.18	0	14	tr|Q8IJ11|Q8IJ11_PLAF7	1.14531e+08	1.15683e+08	1.03715e+08	1.49803e+08	1.14456e+08	1.02302e+08	1.14531e+08	1.14456e+08	0.0593169	0.201951	-0.000948246	0.0277778	0.0555556	0.507283
tr|Q8ILF2|Q8ILF2_PLAF7	Q8ILF2	PF3D7_1431300	Large ribosomal subunit associated GTPase,putative OS=Plasmodium falciparum (isolate 3D7) OX=36329 GN=PF3D7_1431300 PE=4 SV=1	64	0.000829876	2	tr|Q8ILF2|Q8ILF2_PLAF7	629249	524841	525256	485902	508131	579508	525256	508131	0.107471	0.0932403	-0.0478202	0	0	0.50823
tr|Q8IHS2|Q8IHS2_PLAF7	Q8IHS2	PF3D7_1144500	Ubiquitin activating enzyme (E1) subunit Aos1,putative OS=Plasmodium falciparum (isolate 3D7) OX=36329 GN=PF3D7_1144500 PE=4 SV=1	59.54	0.000814332	3	tr|Q8IHS2|Q8IHS2_PLAF7	3.15881e+06	3.06176e+06	3.83382e+06	3.32506e+06	3.25638e+06	2.79285e+06	3.15881e+06	3.25638e+06	0.125479	0.0926437	0.0438858	0	0	0.508309
tr|Q9U0H1|Q9U0H1_PLAF7	Q9U0H1	PF3D7_0411900	DNA polymerase OS=Plasmodium falciparum (isolate 3D7) OX=36329 GN=PF3D7_0411900 PE=3 SV=2	179.87	0	5	tr|Q9U0H1|Q9U0H1_PLAF7	746149	576515	588280	526285	733957	492380	588280	526285	0.148709	0.223876	-0.160658	0.142857	0.238095	0.511783
tr|O77364|O77364_PLAF7	O77364	PF3D7_0312800	60S ribosomal protein L26, putative OS=Plasmodium falciparum (isolate 3D7) OX=36329 GN=PF3D7_0312800 PE=1 SV=1	314.21	0	7	tr|O77364|O77364_PLAF7	6.47768e+07	4.53191e+07	5.03363e+07	5.44401e+07	4.50416e+07	4.7225e+07	5.03363e+07	4.7225e+07	0.188902	0.10058	-0.0920482	0	0	0.51236
tr|Q9U0N1|Q9U0N1_PLAF7	Q9U0N1	PF3D7_0113000	Glutamic acid-rich protein OS=Plasmodium falciparum (isolate 3D7) OX=36329 GN=PF3D7_0113000 PE=4 SV=1	224.9	0	5	tr|Q9U0N1|Q9U0N1_PLAF7	2.01e+07	1.6207e+07	1.20867e+07	2.56399e+07	1.6912e+07	1.38003e+07	1.6207e+07	1.6912e+07	0.248411	0.326757	0.0614308	0	0	0.512884
tr|Q8IDM3|Q8IDM3_PLAF7	Q8IDM3	PF3D7_1347500	DNA/RNA-binding protein Alba 4 OS=Plasmodium falciparum (isolate 3D7) OX=36329 GN=PF3D7_1347500 PE=4 SV=1	1354.61	0	24	tr|Q8IDM3|Q8IDM3_PLAF7	3.88207e+08	3.00558e+08	3.28706e+08	2.97973e+08	3.08072e+08	3.43104e+08	3.28706e+08	3.08072e+08	0.131943	0.0748634	-0.0935296	0.0638298	0.0425532	0.514464
tr|Q8IKE8|Q8IKE8_PLAF7	Q8IKE8	PF3D7_1468900	C2H2-type domain-containing protein OS=Plasmodium falciparum (isolate 3D7) OX=36329 GN=PF3D7_1468900 PE=4 SV=1	273.45	0	10	tr|Q8IKE8|Q8IKE8_PLAF7	4.11449e+06	3.51461e+06	3.46202e+06	3.95896e+06	3.94732e+06	3.77559e+06	3.51461e+06	3.94732e+06	0.0980449	0.0263674	0.167509	0.121212	0.121212	0.514612
tr|Q8IAU0|Q8IAU0_PLAF7	Q8IAU0	PF3D7_0810500	Protein phosphatase PPM7, putative OS=Plasmodium falciparum (isolate 3D7) OX=36329 GN=PF3D7_0810500 PE=4 SV=1	33.89	0.00682594	1	tr|Q8IAU0|Q8IAU0_PLAF7	229462	1.99857e+06	2.2983e+06	1.71036e+06	1.87938e+06	1.18459e+06	1.99857e+06	1.71036e+06	0.741004	0.22768	-0.224667	0	0	0.515082
tr|Q8IB73|Q8IB73_PLAF7	Q8IB73	PF3D7_0823900	Dicarboxylate/tricarboxylate carrier OS=Plasmodium falciparum (isolate 3D7) OX=36329 GN=PF3D7_0823900 PE=3 SV=1	499.67	0	12	tr|Q8IB73|Q8IB73_PLAF7	9.74728e+06	6.71643e+06	7.24413e+06	8.43518e+06	8.10504e+06	8.77282e+06	7.24413e+06	8.43518e+06	0.204891	0.0395726	0.219607	0.104167	0.0833333	0.517123
tr|Q8IIG9|Q8IIG9_PLAF7	Q8IIG9	PF3D7_1119800	Alternative splicing factor ASF-1, putative OS=Plasmodium falciparum (isolate 3D7) OX=36329 GN=PF3D7_1119800 PE=4 SV=1	48.73	0.000759301	2	tr|Q8IIG9|Q8IIG9_PLAF7	2.05054e+06	1.4221e+06	1.46663e+06	1.40366e+06	1.80536e+06	1.25379e+06	1.46663e+06	1.40366e+06	0.212995	0.191721	-0.0633089	0	0	0.517587
tr|Q76NM4|Q76NM4_PLAF7	Q76NM4	PF3D7_1320600	Ras-related protein Rab-11A OS=Plasmodium falciparum (isolate 3D7) OX=36329 GN=PF3D7_1320600 PE=1 SV=1	765.59	0	14	tr|Q76NM4|Q76NM4_PLAF7	3.79526e+07	3.09974e+07	3.39331e+07	3.50312e+07	3.68173e+07	3.65418e+07	3.39331e+07	3.65418e+07	0.101813	0.0266149	0.106857	0.0175439	0.0526316	0.518324
tr|C6S3B8|C6S3B8_PLAF7	C6S3B8	PF3D7_0218200	SUZ domain-containing protein OS=Plasmodium falciparum (isolate 3D7) OX=36329 GN=PF3D7_0218200 PE=4 SV=1	48.44	0.000757576	1	tr|C6S3B8|C6S3B8_PLAF7	64472	383619	340425	208339	437131	260465	340425	260465	0.658742	0.397088	-0.386248	0	0	0.518786
tr|Q8IHN7|Q8IHN7_PLAF7	Q8IHN7	PF3D7_1148700	PRESAN domain-containing protein OS=Plasmodium falciparum (isolate 3D7) OX=36329 GN=PF3D7_1148700 PE=4 SV=1	33.88	0.00682128	1	tr|Q8IHN7|Q8IHN7_PLAF7	850945	456848	512867	818647	631752	568580	512867	631752	0.351315	0.193218	0.300774	0	0	0.519327
tr|Q8IEM1|Q8IEM1_PLAF7	Q8IEM1	PF3D7_1309300	U4/U6 small nuclear ribonucleoprotein PRP3,putative OS=Plasmodium falciparum (isolate 3D7) OX=36329 GN=PF3D7_1309300 PE=4 SV=1	37.03	0.00490884	1	tr|Q8IEM1|Q8IEM1_PLAF7	422575	594078	479640	339074	581346	437520	479640	437520	0.175106	0.269177	-0.132605	0	0	0.520327
sp|Q8I2J4|PROF_PLAF7	Q8I2J4	Pfn	Profilin OS=Plasmodium falciparum (isolate 3D7) OX=36329 GN=Pfn PE=3 SV=1	379.51	0	7	sp|Q8I2J4|PROF_PLAF7	2.0224e+07	2.72354e+07	2.59506e+07	2.06976e+07	2.24676e+07	2.47008e+07	2.59506e+07	2.24676e+07	0.152548	0.0886783	-0.207922	0.037037	0	0.520516
tr|Q8ILE4|Q8ILE4_PLAF7	Q8ILE4	PF3D7_1432000	Syntaxin, Qa-SNARE family OS=Plasmodium falciparum (isolate 3D7) OX=36329 GN=PF3D7_1432000 PE=4 SV=1	92.52	0	2	tr|Q8ILE4|Q8ILE4_PLAF7	49880.9	72804.4	88541.4	47000.5	73959.1	63293.2	72804.4	63293.2	0.276119	0.221057	-0.201975	0	0	0.520771
tr|C0H5J0|C0H5J0_PLAF7	C0H5J0	PF3D7_1359000	Uncharacterized protein OS=Plasmodium falciparum (isolate 3D7) OX=36329 GN=PF3D7_1359000 PE=4 SV=1	35.56	0.00554401	2	tr|C0H5J0|C0H5J0_PLAF7	192493	210708	184914	193644	252354	189556	192493	193644	0.067628	0.165853	0.00859796	0.166667	0	0.520775
tr|Q8IDS6|Q8IDS6_PLAF7	Q8IDS6	PF3D7_1341200	60S ribosomal protein L18a OS=Plasmodium falciparum (isolate 3D7) OX=36329 GN=PF3D7_1341200 PE=1 SV=1	1612.77	0	23	tr|Q8IDS6|Q8IDS6_PLAF7	2.68696e+08	1.87e+08	2.00233e+08	2.10963e+08	1.98274e+08	1.9094e+08	2.00233e+08	1.98274e+08	0.200551	0.0506334	-0.0141836	0.0396825	0.0714286	0.521562
tr|Q8IL28|Q8IL28_PLAF7	Q8IL28	PF3D7_1444300	1-acyl-sn-glycerol-3-phosphate acyltransferase,putative OS=Plasmodium falciparum (isolate 3D7) OX=36329 GN=PF3D7_1444300 PE=4 SV=2	118.72	0	4	tr|Q8IL28|Q8IL28_PLAF7	2.03153e+07	1.19925e+07	1.07502e+07	1.93066e+07	1.35279e+07	1.4832e+07	1.19925e+07	1.4832e+07	0.362373	0.190752	0.306587	0.0666667	0	0.522797
tr|Q8ILX3|Q8ILX3_PLAF7	Q8ILX3	PF3D7_1412100	Uncharacterized protein OS=Plasmodium falciparum (isolate 3D7) OX=36329 GN=PF3D7_1412100 PE=4 SV=1	484	0	14	tr|Q8ILX3|Q8ILX3_PLAF7	4.40648e+06	4.96033e+06	6.0143e+06	4.02707e+06	4.79701e+06	5.35228e+06	4.96033e+06	4.79701e+06	0.159307	0.140832	-0.0482994	0	0	0.524235
tr|Q8IIU9|Q8IIU9_PLAF7	Q8IIU9	PF3D7_1105300	Uncharacterized protein OS=Plasmodium falciparum (isolate 3D7) OX=36329 GN=PF3D7_1105300 PE=4 SV=2	45.23	0.00148478	1	tr|Q8IIU9|Q8IIU9_PLAF7	92737.7	48258.4	50948.5	44985.1	56727.6	60158.2	50948.5	56727.6	0.389798	0.147469	0.155013	0	0	0.524529
tr|Q8IKP7|Q8IKP7_PLAF7	Q8IKP7	PF3D7_1458400	Aminodeoxychorismate lyase OS=Plasmodium falciparum (isolate 3D7) OX=36329 GN=PF3D7_1458400 PE=4 SV=1	214.13	0	6	tr|Q8IKP7|Q8IKP7_PLAF7	4.84664e+06	4.93718e+06	5.23482e+06	4.54701e+06	4.55849e+06	5.18683e+06	4.93718e+06	4.55849e+06	0.0405672	0.0768518	-0.115132	0	0	0.524733
tr|O96236|O96236_PLAF7	O96236	PF3D7_0215700	DNA-directed RNA polymerase subunit beta OS=Plasmodium falciparum (isolate 3D7) OX=36329 GN=PF3D7_0215700 PE=3 SV=3	980.02	0	25	tr|O96236|O96236_PLAF7	1.51961e+07	1.6102e+07	1.8532e+07	1.74136e+07	1.75861e+07	1.74036e+07	1.6102e+07	1.74136e+07	0.103852	0.00587148	0.112976	0.0222222	0	0.525523
tr|C6S3I4|C6S3I4_PLAF7	C6S3I4	PF3D7_1433000	H/ACA ribonucleoprotein complex subunit 3,putative OS=Plasmodium falciparum (isolate 3D7) OX=36329 GN=PF3D7_1433000 PE=4 SV=1	115.13	0	3	tr|C6S3I4|C6S3I4_PLAF7	1.42659e+06	679545	877156	688068	921435	891419	877156	891419	0.389253	0.152295	0.0232704	0	0	0.525574
tr|Q8I3L4|Q8I3L4_PLAF7	Q8I3L4	PF3D7_0525100	Acyl-CoA synthetase OS=Plasmodium falciparum (isolate 3D7) OX=36329 GN=PF3D7_0525100 PE=4 SV=1	1845.49	0	32	tr|Q8I3L4|Q8I3L4_PLAF7	1.18829e+08	1.12228e+08	1.06726e+08	1.19149e+08	1.16235e+08	1.18154e+08	1.12228e+08	1.18154e+08	0.053822	0.012567	0.0742375	0.00757576	0	0.525585
tr|Q8IB88|Q8IB88_PLAF7	Q8IB88	PF3D7_0825500	Protein KRI1, putative OS=Plasmodium falciparum (isolate 3D7) OX=36329 GN=PF3D7_0825500 PE=4 SV=1	53.9	0.000786164	2	tr|Q8IB88|Q8IB88_PLAF7	784233	1.14144e+06	962354	1.05478e+06	945955	1.08714e+06	962354	1.05478e+06	0.185529	0.0718577	0.132303	0	0	0.525853
tr|Q8I4Y5|Q8I4Y5_PLAF7	Q8I4Y5	PF3D7_1244600	ADP-ribosylation factor GTPase-activating protein, putative OS=Plasmodium falciparum (isolate 3D7) OX=36329 GN=PF3D7_1244600 PE=1 SV=1	295.67	0	9	tr|Q8I4Y5|Q8I4Y5_PLAF7	1.66145e+07	2.26852e+07	2.31278e+07	1.85556e+07	1.96645e+07	1.91811e+07	2.26852e+07	1.91811e+07	0.174896	0.0290573	-0.242069	0	0	0.526361
tr|C6KT55|C6KT55_PLAF7	C6KT55	PF3D7_0621800	Nascent polypeptide-associated complex subunit alpha, putative OS=Plasmodium falciparum (isolate 3D7) OX=36329 GN=PF3D7_0621800 PE=4 SV=1	517.59	0	11	tr|C6KT55|C6KT55_PLAF7	1.51986e+08	1.52363e+08	1.36542e+08	1.59945e+08	1.3932e+08	1.68025e+08	1.51986e+08	1.59945e+08	0.0614272	0.0950319	0.0736371	0	0	0.526424
tr|Q8I3U1|Q8I3U1_PLAF7	Q8I3U1	PF3D7_0516700	Ubiquitin carboxyl-terminal hydrolase 2,putative OS=Plasmodium falciparum (isolate 3D7) OX=36329 GN=PF3D7_0516700 PE=3 SV=1	235.55	0	6	tr|Q8I3U1|Q8I3U1_PLAF7	8.16065e+06	6.66955e+06	7.40356e+06	6.9697e+06	6.945e+06	7.09044e+06	7.40356e+06	6.9697e+06	0.100601	0.0111148	-0.0871227	0	0	0.527164
tr|Q8III6|Q8III6_PLAF7	Q8III6	PF3D7_1118200	Heat shock protein 90, putative OS=Plasmodium falciparum (isolate 3D7) OX=36329 GN=PF3D7_1118200 PE=3 SV=1	1930.5	0	46	tr|Q8III6|Q8III6_PLAF7	1.34317e+08	9.61438e+07	1.02727e+08	1.21092e+08	1.15426e+08	1.17255e+08	1.02727e+08	1.17255e+08	0.183733	0.0245216	0.190827	0.0107527	0	0.52854
tr|Q8IJZ3|Q8IJZ3_PLAF7	Q8IJZ3	PF3D7_1004400	RNA-binding protein, putative OS=Plasmodium falciparum (isolate 3D7) OX=36329 GN=PF3D7_1004400 PE=4 SV=1	920.76	0	21	tr|Q8IJZ3|Q8IJZ3_PLAF7	2.28152e+07	1.79329e+07	1.74282e+07	1.97621e+07	2.0544e+07	2.12812e+07	1.79329e+07	2.0544e+07	0.153423	0.0370043	0.196105	0.0344828	0.0804598	0.529407
tr|Q8IKM7|Q8IKM7_PLAF7	Q8IKM7	PF3D7_1460500	Uncharacterized protein OS=Plasmodium falciparum (isolate 3D7) OX=36329 GN=PF3D7_1460500 PE=4 SV=1	72.19	0.000859107	3	tr|Q8IKM7|Q8IKM7_PLAF7	1.10561e+06	1.0115e+06	753829	1.02412e+06	1.10296e+06	946765	1.0115e+06	1.02412e+06	0.190304	0.0762228	0.0178815	0.111111	0	0.530361
tr|Q8IEK3|Q8IEK3_PLAF7	Q8IEK3	PF3D7_1311500	26S protease regulatory subunit 7, putative OS=Plasmodium falciparum (isolate 3D7) OX=36329 GN=PF3D7_1311500 PE=3 SV=2	1072.88	0	22	tr|Q8IEK3|Q8IEK3_PLAF7	3.23545e+07	3.51808e+07	3.31661e+07	3.26154e+07	3.21723e+07	3.14322e+07	3.31661e+07	3.21723e+07	0.0433512	0.0186387	-0.0438904	0	0	0.530529
tr|Q8I6T5|Q8I6T5_PLAF7	Q8I6T5	PF3D7_1314500	Cop-coated vesicle membrane protein p24, putative OS=Plasmodium falciparum (isolate 3D7) OX=36329 GN=PF3D7_1314500 PE=3 SV=1	253.42	0	4	tr|Q8I6T5|Q8I6T5_PLAF7	2.96977e+06	2.18307e+06	2.42773e+06	2.66669e+06	2.60914e+06	2.74886e+06	2.42773e+06	2.66669e+06	0.159332	0.0262519	0.135443	0	0	0.532114
tr|Q8IJ31|Q8IJ31_PLAF7	Q8IJ31	PF3D7_1037600	DNA repair helicase RAD25, putative OS=Plasmodium falciparum (isolate 3D7) OX=36329 GN=PF3D7_1037600 PE=4 SV=1	119.13	0	2	tr|Q8IJ31|Q8IJ31_PLAF7	469114	106847	299638	173648	167527	245522	299638	173648	0.621032	0.221774	-0.787059	0.333333	0.333333	0.532678
tr|A0A144A3E6|A0A144A3E6_PLAF7	A0A144A3E6	PF3D7_1432700	Protein-L-isoaspartate(D-aspartate) O-methyltransferase, putative OS=Plasmodium falciparum (isolate 3D7) OX=36329 GN=PF3D7_1432700 PE=4 SV=1	199.59	0	3	tr|A0A144A3E6|A0A144A3E6_PLAF7	1.53288e+06	2.24266e+06	2.4411e+06	1.5221e+06	2.07175e+06	1.9628e+06	2.24266e+06	1.9628e+06	0.23043	0.157125	-0.192297	0	0	0.532768
tr|C0H5J5|C0H5J5_PLAF7	C0H5J5	PF3D7_1360900.1	Polyadenylate-binding protein, putative OS=Plasmodium falciparum (isolate 3D7) OX=36329 GN=PF3D7_1360900.1 PE=4 SV=2	470.58	0	11	tr|C0H5J5|C0H5J5_PLAF7	3.48157e+07	3.41854e+07	3.56652e+07	2.7656e+07	3.52114e+07	3.614e+07	3.48157e+07	3.52114e+07	0.0212849	0.141001	0.016304	0	0	0.533958
tr|C0H4K6|C0H4K6_PLAF7	C0H4K6	PF3D7_0704600	E3 ubiquitin-protein ligase OS=Plasmodium falciparum (isolate 3D7) OX=36329 GN=PF3D7_0704600 PE=4 SV=1	284.9	0	9	tr|C0H4K6|C0H4K6_PLAF7	2.49683e+06	3.02356e+06	2.89546e+06	2.96724e+06	2.89827e+06	2.97511e+06	2.89546e+06	2.96724e+06	0.097924	0.0143456	0.0353269	0.037037	0	0.534687
tr|C6KT59|C6KT59_PLAF7	C6KT59	PF3D7_0622200	Radical SAM protein, putative OS=Plasmodium falciparum (isolate 3D7) OX=36329 GN=PF3D7_0622200 PE=4 SV=1	91.06	0	2	tr|C6KT59|C6KT59_PLAF7	308023	180959	212206	320481	222120	232787	212206	232787	0.283275	0.208826	0.133544	0	0	0.534996
tr|O97285|O97285_PLAF7	O97285	PF3D7_0320800	ATP-dependent RNA helicase DDX6 OS=Plasmodium falciparum (isolate 3D7) OX=36329 GN=PF3D7_0320800 PE=3 SV=1	444.74	0	12	tr|O97285|O97285_PLAF7	1.44805e+07	1.35306e+07	1.35577e+07	1.29487e+07	1.30991e+07	1.36993e+07	1.35577e+07	1.30991e+07	0.0390273	0.0299733	-0.0496379	0.0714286	0.0714286	0.535828
tr|Q9NFE6|Q9NFE6_PLAF7	Q9NFE6	PF3D7_0310600.1	Eukaryotic translation initiation factor 3 subunit K OS=Plasmodium falciparum (isolate 3D7) OX=36329 GN=PF3D7_0310600.1 PE=3 SV=1	199.04	0	6	tr|Q9NFE6|Q9NFE6_PLAF7	1.87933e+07	2.14401e+07	1.93754e+07	2.43566e+07	2.10129e+07	1.84515e+07	1.93754e+07	2.10129e+07	0.0699993	0.139196	0.117046	0	0	0.536607
tr|Q8III3|Q8III3_PLAF7	Q8III3	PF3D7_1118500	Nucleolar protein 56, putative OS=Plasmodium falciparum (isolate 3D7) OX=36329 GN=PF3D7_1118500 PE=4 SV=1	846.27	0	19	tr|Q8III3|Q8III3_PLAF7	2.37995e+07	1.92582e+07	1.96799e+07	2.11107e+07	2.25138e+07	2.24493e+07	1.96799e+07	2.24493e+07	0.119979	0.0359644	0.189945	0.0151515	0	0.538255
tr|Q8IE73|Q8IE73_PLAF7	Q8IE73	PF3D7_1324400	MSF1-like protein, putative OS=Plasmodium falciparum (isolate 3D7) OX=36329 GN=PF3D7_1324400 PE=4 SV=1	49	0.000761035	1	tr|Q8IE73|Q8IE73_PLAF7	1.00799e+06	931004	1.08471e+06	902974	1.16262e+06	1.18389e+06	1.00799e+06	1.16262e+06	0.0762509	0.144398	0.205887	0	0	0.538395
tr|C0H5I4|C0H5I4_PLAF7	C0H5I4	PF3D7_1354600	60S ribosomal protein L7-2, putative OS=Plasmodium falciparum (isolate 3D7) OX=36329 GN=PF3D7_1354600 PE=4 SV=1	97.45	0	3	tr|C0H5I4|C0H5I4_PLAF7	475238	291193	322735	343518	293895	334923	322735	334923	0.271102	0.0818209	0.0534811	0.111111	0.222222	0.538868
tr|Q8IE97|Q8IE97_PLAF7	Q8IE97	PF3D7_1321900	Uncharacterized protein OS=Plasmodium falciparum (isolate 3D7) OX=36329 GN=PF3D7_1321900 PE=4 SV=1	178.78	0	5	tr|Q8IE97|Q8IE97_PLAF7	6.03977e+06	3.37753e+06	2.07235e+06	3.52201e+06	2.86799e+06	2.46408e+06	3.37753e+06	2.86799e+06	0.52796	0.18089	-0.235928	0.111111	0.0555556	0.540494
tr|Q8IC42|Q8IC42_PLAF7	Q8IC42	PF3D7_0702500	Uncharacterized protein OS=Plasmodium falciparum (isolate 3D7) OX=36329 GN=PF3D7_0702500 PE=4 SV=1	1016.27	0	15	tr|Q8IC42|Q8IC42_PLAF7	6.51211e+07	6.46535e+07	5.58616e+07	6.85203e+07	6.3358e+07	6.31325e+07	6.46535e+07	6.3358e+07	0.0842976	0.0468835	-0.0292014	0.025641	0.0128205	0.541424
sp|Q8ID66|PF92_PLAF7	Q8ID66	PF92	Merozoite surface protein P92 OS=Plasmodium falciparum (isolate 3D7) OX=36329 GN=PF92 PE=1 SV=1	530.72	0	13	sp|Q8ID66|PF92_PLAF7	1.10414e+07	9.99804e+06	9.42643e+06	1.00149e+07	1.07193e+07	1.13069e+07	9.99804e+06	1.07193e+07	0.0806385	0.0605692	0.100498	0	0	0.542057
tr|A0A144A0G8|A0A144A0G8_PLAF7	A0A144A0G8	PF3D7_1213800	Proline--tRNA ligase OS=Plasmodium falciparum (isolate 3D7) OX=36329 GN=PF3D7_1213800 PE=3 SV=1	1343.84	0	31	tr|A0A144A0G8|A0A144A0G8_PLAF7	2.74163e+07	3.31137e+07	3.35646e+07	3.15932e+07	2.8092e+07	2.89663e+07	3.31137e+07	2.89663e+07	0.109261	0.0616663	-0.19305	0.00740741	0.00740741	0.542753
tr|C6KSY6|C6KSY6_PLAF7	C6KSY6	PF3D7_0614500	60S ribosomal protein L19 OS=Plasmodium falciparum (isolate 3D7) OX=36329 GN=PF3D7_0614500 PE=1 SV=1	713.15	0	11	tr|C6KSY6|C6KSY6_PLAF7	1.32017e+08	1.23293e+08	1.00643e+08	1.26124e+08	1.12022e+08	9.22897e+07	1.23293e+08	1.12022e+08	0.136486	0.154297	-0.138305	0	0	0.543004
sp|Q8ID39|Y13P2_PLAF7	Q8ID39	MAL13P1.336	Uncharacterized protein MAL13P1.336 OS=Plasmodium falciparum (isolate 3D7) OX=36329 GN=MAL13P1.336 PE=1 SV=1	694.71	0	21	sp|Q8ID39|Y13P2_PLAF7	3.40656e+07	4.96757e+07	4.03032e+07	2.93083e+07	4.5453e+07	3.82693e+07	4.03032e+07	3.82693e+07	0.190028	0.214684	-0.0747084	0.0533333	0.0266667	0.543101
tr|Q8II62|Q8II62_PLAF7	Q8II62	PF3D7_1130100	60S ribosomal protein L38 OS=Plasmodium falciparum (isolate 3D7) OX=36329 GN=PF3D7_1130100 PE=1 SV=1	463.13	0	10	tr|Q8II62|Q8II62_PLAF7	6.47354e+07	5.14287e+07	5.6547e+07	5.18105e+07	5.32085e+07	5.76737e+07	5.6547e+07	5.32085e+07	0.11659	0.0564694	-0.0877934	0.0512821	0.025641	0.545036
tr|C0H4B1|C0H4B1_PLAF7	C0H4B1	PF3D7_0417500.1	Memo-like protein OS=Plasmodium falciparum (isolate 3D7) OX=36329 GN=PF3D7_0417500.1 PE=3 SV=1	276.17	0	10	tr|C0H4B1|C0H4B1_PLAF7	7.67506e+06	4.90976e+06	5.53347e+06	4.67221e+06	5.06525e+06	6.58805e+06	5.53347e+06	5.06525e+06	0.240158	0.185951	-0.127551	0.030303	0	0.545713
tr|Q8IIW0|Q8IIW0_PLAF7	Q8IIW0	PF3D7_1104200	Chromatin remodeling protein OS=Plasmodium falciparum (isolate 3D7) OX=36329 GN=PF3D7_1104200 PE=4 SV=1	989.05	0	25	tr|Q8IIW0|Q8IIW0_PLAF7	1.7737e+07	1.2371e+07	1.19716e+07	1.60435e+07	1.37841e+07	1.51233e+07	1.2371e+07	1.51233e+07	0.229533	0.0758245	0.289812	0.0666667	0.0133333	0.545765
tr|Q7K6A0|Q7K6A0_PLAF7	Q7K6A0	PF3D7_0934800	cAMP-dependent protein kinase catalytic subunit OS=Plasmodium falciparum (isolate 3D7) OX=36329 GN=PF3D7_0934800 PE=3 SV=1	159.14	0	7	tr|Q7K6A0|Q7K6A0_PLAF7	2.22523e+06	1.80768e+06	1.99637e+06	1.83749e+06	1.72044e+06	2.11853e+06	1.99637e+06	1.83749e+06	0.104039	0.108128	-0.119639	0.0416667	0.0416667	0.54604
tr|Q8I562|Q8I562_PLAF7	Q8I562	PF3D7_1236100	Clustered-asparagine-rich protein OS=Plasmodium falciparum (isolate 3D7) OX=36329 GN=PF3D7_1236100 PE=4 SV=2	483.44	0	13	tr|Q8I562|Q8I562_PLAF7	4.55873e+07	4.78426e+07	4.26361e+07	3.94722e+07	4.58372e+07	4.42113e+07	4.55873e+07	4.42113e+07	0.0575676	0.0765972	-0.044217	0.0208333	0	0.546268
tr|Q8I348|Q8I348_PLAF7	Q8I348	PF3D7_0910400	Selenide water dikinase, putative OS=Plasmodium falciparum (isolate 3D7) OX=36329 GN=PF3D7_0910400 PE=4 SV=1	133.13	0	3	tr|Q8I348|Q8I348_PLAF7	1.0542e+06	731126	714242	810032	792747	667660	731126	792747	0.229943	0.102655	0.11674	0	0	0.54656
tr|Q8I206|Q8I206_PLAF7	Q8I206	PF3D7_0402000	PRESAN domain-containing protein OS=Plasmodium falciparum (isolate 3D7) OX=36329 GN=PF3D7_0402000 PE=4 SV=1	183.96	0	5	tr|Q8I206|Q8I206_PLAF7	8.37697e+06	5.45118e+06	5.12165e+06	8.2377e+06	5.93803e+06	6.51481e+06	5.45118e+06	6.51481e+06	0.283685	0.173483	0.257156	0	0.047619	0.546735
tr|Q8I3Q7|Q8I3Q7_PLAF7	Q8I3Q7	PF3D7_0520300	U6 snRNA-associated Sm-like protein LSm2 OS=Plasmodium falciparum (isolate 3D7) OX=36329 GN=PF3D7_0520300 PE=3 SV=1	37.65	0.00422238	1	tr|Q8I3Q7|Q8I3Q7_PLAF7	261662	331271	397696	92543.4	542557	298477	331271	298477	0.206001	0.723912	-0.150391	0	0	0.549017
tr|Q8I5T1|Q8I5T1_PLAF7	Q8I5T1	PF3D7_1212100	Peripheral plastid protein 1, putative OS=Plasmodium falciparum (isolate 3D7) OX=36329 GN=PF3D7_1212100 PE=4 SV=1	37.85	0.00422833	1	tr|Q8I5T1|Q8I5T1_PLAF7	334825	375723	333442	384410	330753	385855	334825	384410	0.0690287	0.0855681	0.199241	0	0	0.549967
tr|Q8I4U7|Q8I4U7_PLAF7	Q8I4U7	PF3D7_1248700	Uncharacterized protein OS=Plasmodium falciparum (isolate 3D7) OX=36329 GN=PF3D7_1248700 PE=4 SV=1	610.97	0	15	tr|Q8I4U7|Q8I4U7_PLAF7	1.30817e+07	1.05323e+07	8.62351e+06	1.08646e+07	9.96364e+06	8.59064e+06	1.05323e+07	9.96364e+06	0.208152	0.116774	-0.0800714	0.0350877	0	0.550928
tr|Q8IDR5|Q8IDR5_PLAF7	Q8IDR5	PF3D7_1342400	Casein kinase II subunit beta OS=Plasmodium falciparum (isolate 3D7) OX=36329 GN=PF3D7_1342400 PE=3 SV=1	207.14	0	6	tr|Q8IDR5|Q8IDR5_PLAF7	1.73187e+07	1.23615e+07	1.31228e+07	1.58503e+07	1.16342e+07	1.18364e+07	1.31228e+07	1.18364e+07	0.187105	0.181425	-0.148844	0	0	0.551813
tr|Q8IE82|Q8IE82_PLAF7	Q8IE82	PF3D7_1323400	60S ribosomal protein L23 OS=Plasmodium falciparum (isolate 3D7) OX=36329 GN=PF3D7_1323400 PE=1 SV=1	905.97	0	15	tr|Q8IE82|Q8IE82_PLAF7	1.32374e+08	1.12682e+08	1.09915e+08	1.31338e+08	1.01443e+08	1.00624e+08	1.12682e+08	1.01443e+08	0.103499	0.157477	-0.151593	0.0266667	0.0533333	0.552405
tr|Q9U0G8|Q9U0G8_PLAF7	Q9U0G8	PF3D7_0412200	Uncharacterized protein OS=Plasmodium falciparum (isolate 3D7) OX=36329 GN=PF3D7_0412200 PE=4 SV=1	43.37	0.00220426	2	tr|Q9U0G8|Q9U0G8_PLAF7	500897	358758	382201	427557	353327	365928	382201	365928	0.184087	0.103911	-0.0627745	0.166667	0.166667	0.552774
tr|Q8I1S7|Q8I1S7_PLAF7	Q8I1S7	PF3D7_0416000	RNA-binding protein, putative OS=Plasmodium falciparum (isolate 3D7) OX=36329 GN=PF3D7_0416000 PE=4 SV=1	32.93	0.00813559	1	tr|Q8I1S7|Q8I1S7_PLAF7	197278	229019	148224	213238	160933	146413	197278	160933	0.212552	0.20255	-0.293773	0	0	0.552776
tr|Q8I288|Q8I288_PLAF7	Q8I288	PF3D7_0105300	Cyclase-associated protein OS=Plasmodium falciparum (isolate 3D7) OX=36329 GN=PF3D7_0105300 PE=4 SV=1	31.6	0.00938967	1	tr|Q8I288|Q8I288_PLAF7	4068.85	56868.9	53903.8	23603.1	55511.5	38182.7	53903.8	38182.7	0.774944	0.40855	-0.497468	0	0	0.55296
tr|Q8IBS6|Q8IBS6_PLAF7	Q8IBS6	PF3D7_0717400	Queuine tRNA-ribosyltransferase, putative OS=Plasmodium falciparum (isolate 3D7) OX=36329 GN=PF3D7_0717400 PE=4 SV=1	163.09	0	5	tr|Q8IBS6|Q8IBS6_PLAF7	1.39311e+06	1.35751e+06	1.29268e+06	1.48191e+06	1.28441e+06	1.48498e+06	1.35751e+06	1.48191e+06	0.0377808	0.0810949	0.126497	0	0	0.553027
tr|Q8IC16|Q8IC16_PLAF7	Q8IC16	MCM7	DNA replication licensing factor MCM7 OS=Plasmodium falciparum (isolate 3D7) OX=36329 GN=MCM7 PE=3 SV=1	1235.13	0	27	tr|Q8IC16|Q8IC16_PLAF7	4.95156e+07	4.00586e+07	4.47408e+07	4.02694e+07	4.23603e+07	4.44141e+07	4.47408e+07	4.23603e+07	0.105615	0.0489365	-0.0788785	0	0	0.554233
tr|Q8I3B0|Q8I3B0_PLAF7	Q8I3B0	PF3D7_0903900	60S ribosomal protein L32 OS=Plasmodium falciparum (isolate 3D7) OX=36329 GN=PF3D7_0903900 PE=1 SV=1	589.34	0	11	tr|Q8I3B0|Q8I3B0_PLAF7	8.92961e+07	8.05525e+07	7.53616e+07	8.99774e+07	7.49054e+07	6.60501e+07	8.05525e+07	7.49054e+07	0.0861584	0.157156	-0.10486	0	0	0.55439
tr|Q8II45|Q8II45_PLAF7	Q8II45	PF3D7_1132000	Ubiquitin-like protein, putative OS=Plasmodium falciparum (isolate 3D7) OX=36329 GN=PF3D7_1132000 PE=4 SV=1	348.89	0	10	tr|Q8II45|Q8II45_PLAF7	2.63848e+06	3.45584e+06	3.38503e+06	2.26769e+06	3.13547e+06	3.35958e+06	3.38503e+06	3.13547e+06	0.143315	0.197438	-0.110485	0.0833333	0.0833333	0.555262
tr|A0A144A2G5|A0A144A2G5_PLAF7	A0A144A2G5	PF3D7_1116700	Dipeptidyl aminopeptidase 1 OS=Plasmodium falciparum (isolate 3D7) OX=36329 GN=PF3D7_1116700 PE=3 SV=1	885.04	0	21	tr|A0A144A2G5|A0A144A2G5_PLAF7	5.83134e+07	4.94303e+07	4.80829e+07	5.04046e+07	4.63939e+07	5.06592e+07	4.94303e+07	5.04046e+07	0.107016	0.0486746	0.0281607	0.0246914	0	0.555281
tr|C6KST5|C6KST5_PLAF7	C6KST5	PF3D7_0608700	T-complex protein 1 subunit zeta OS=Plasmodium falciparum (isolate 3D7) OX=36329 GN=PF3D7_0608700 PE=3 SV=1	1413.47	0	31	tr|C6KST5|C6KST5_PLAF7	8.41253e+07	8.12318e+07	8.2254e+07	7.91579e+07	7.56899e+07	8.26689e+07	8.2254e+07	7.91579e+07	0.0177787	0.0440755	-0.0553517	0.00877193	0	0.556637
tr|C0H564|C0H564_PLAF7	C0H564	PF3D7_0926400	Monocarboxylate transporter, putative OS=Plasmodium falciparum (isolate 3D7) OX=36329 GN=PF3D7_0926400 PE=4 SV=1	39.52	0.00356633	2	tr|C0H564|C0H564_PLAF7	1.50193e+06	1.39461e+06	1.37338e+06	1.53884e+06	1.51761e+06	1.40748e+06	1.39461e+06	1.51761e+06	0.0484166	0.0473894	0.121935	0	0	0.556757
tr|Q8IAP4|Q8IAP4_PLAF7	Q8IAP4	PF3D7_0804900	GTPase-activating protein, putative OS=Plasmodium falciparum (isolate 3D7) OX=36329 GN=PF3D7_0804900 PE=4 SV=1	317.66	0	9	tr|Q8IAP4|Q8IAP4_PLAF7	2.57362e+06	6.03679e+06	4.71587e+06	2.74358e+06	4.38886e+06	3.86663e+06	4.71587e+06	3.86663e+06	0.393451	0.229309	-0.286446	0	0	0.55762
tr|A0A143ZZ61|A0A143ZZ61_PLAF7	A0A143ZZ61	PF3D7_1015900	Enolase OS=Plasmodium falciparum (isolate 3D7) OX=36329 GN=PF3D7_1015900 PE=3 SV=1	9199.37	0	58	tr|A0A143ZZ61|A0A143ZZ61_PLAF7	4.31471e+09	4.79539e+09	5.09988e+09	4.45674e+09	4.44933e+09	4.62006e+09	4.79539e+09	4.45674e+09	0.0835751	0.0214032	-0.105661	0.0126984	0.0142857	0.557727
tr|Q8IDP8|Q8IDP8_PLAF7	Q8IDP8	PF3D7_1344800	Aspartate carbamoyltransferase OS=Plasmodium falciparum (isolate 3D7) OX=36329 GN=PF3D7_1344800 PE=1 SV=1	781.61	0	22	tr|Q8IDP8|Q8IDP8_PLAF7	3.95436e+07	2.62573e+07	2.77112e+07	3.43602e+07	3.13524e+07	3.36508e+07	2.77112e+07	3.36508e+07	0.233794	0.0474722	0.280172	0.0833333	0.0714286	0.558458
tr|Q8I5J2|Q8I5J2_PLAF7	Q8I5J2	PF3D7_1222100	Uncharacterized protein OS=Plasmodium falciparum (isolate 3D7) OX=36329 GN=PF3D7_1222100 PE=4 SV=1	166.96	0	7	tr|Q8I5J2|Q8I5J2_PLAF7	2.0576e+06	2.98576e+06	3.1257e+06	2.3655e+06	3.09324e+06	3.51118e+06	2.98576e+06	3.09324e+06	0.213182	0.193908	0.0510205	0	0	0.55855
tr|Q8I1X3|Q8I1X3_PLAF7	Q8I1X3	PF3D7_0405600	Uncharacterized protein OS=Plasmodium falciparum (isolate 3D7) OX=36329 GN=PF3D7_0405600 PE=4 SV=2	105.47	0	4	tr|Q8I1X3|Q8I1X3_PLAF7	1.34727e+07	7.51377e+06	7.1268e+06	7.79951e+06	8.39614e+06	7.91916e+06	7.51377e+06	7.91916e+06	0.379612	0.0392679	0.0758105	0	0	0.560006
tr|Q8IIC8|Q8IIC8_PLAF7	Q8IIC8	PF3D7_1123500	Uncharacterized protein OS=Plasmodium falciparum (isolate 3D7) OX=36329 GN=PF3D7_1123500 PE=4 SV=1	465.44	0	15	tr|Q8IIC8|Q8IIC8_PLAF7	8.25823e+06	7.17194e+06	7.03591e+06	8.72864e+06	8.20466e+06	6.92747e+06	7.17194e+06	8.20466e+06	0.0894553	0.116483	0.194081	0.0208333	0	0.560726
tr|Q8I5N9|Q8I5N9_PLAF7	Q8I5N9	PF3D7_1216900	DNA-binding chaperone, putative OS=Plasmodium falciparum (isolate 3D7) OX=36329 GN=PF3D7_1216900 PE=4 SV=1	598.7	0	21	tr|Q8I5N9|Q8I5N9_PLAF7	1.50316e+07	1.53029e+07	1.73863e+07	1.45793e+07	1.58294e+07	1.50459e+07	1.53029e+07	1.50459e+07	0.0809926	0.041695	-0.0244274	0.101449	0.0869565	0.560826
tr|Q8IB51|Q8IB51_PLAF7	Q8IB51	PF3D7_0821700	60S ribosomal protein L22, putative OS=Plasmodium falciparum (isolate 3D7) OX=36329 GN=PF3D7_0821700 PE=1 SV=1	438.7	0	8	tr|Q8IB51|Q8IB51_PLAF7	2.30625e+07	2.34272e+07	2.4609e+07	2.13542e+07	2.40999e+07	2.26294e+07	2.34272e+07	2.26294e+07	0.0341112	0.0605443	-0.0499828	0.025641	0.0769231	0.560831
tr|C0H4G4|C0H4G4_PLAF7	C0H4G4	PF3D7_0527600	Uncharacterized protein OS=Plasmodium falciparum (isolate 3D7) OX=36329 GN=PF3D7_0527600 PE=4 SV=2	150.6	0	3	tr|C0H4G4|C0H4G4_PLAF7	1.00151e+06	1.28649e+06	1.20717e+06	797127	1.36798e+06	1.07255e+06	1.20717e+06	1.07255e+06	0.126247	0.264528	-0.170587	0	0	0.56107
tr|Q8IDU6|Q8IDU6_PLAF7	Q8IDU6	PF3D7_1338700	Uncharacterized protein OS=Plasmodium falciparum (isolate 3D7) OX=36329 GN=PF3D7_1338700 PE=4 SV=1	34.06	0.00683527	2	tr|Q8IDU6|Q8IDU6_PLAF7	1.43495e+06	874273	872579	1.07566e+06	1.02332e+06	710196	874273	1.02332e+06	0.305675	0.211056	0.227101	0	0	0.561671
tr|Q8ILV1|Q8ILV1_PLAF7	Q8ILV1	PF3D7_1414400	Serine/threonine-protein phosphatase OS=Plasmodium falciparum (isolate 3D7) OX=36329 GN=PF3D7_1414400 PE=1 SV=1	336.11	0	9	tr|Q8ILV1|Q8ILV1_PLAF7	4.34036e+06	5.63282e+06	4.86434e+06	5.65193e+06	4.78573e+06	5.25432e+06	4.86434e+06	5.25432e+06	0.131438	0.0828926	0.11126	0	0	0.561955
tr|C6KSY0|C6KSY0_PLAF7	C6KSY0	PF3D7_0613800	Transcription factor with AP2 domain(S) OS=Plasmodium falciparum (isolate 3D7) OX=36329 GN=PF3D7_0613800 PE=4 SV=1	35.99	0.00555942	2	tr|C6KSY0|C6KSY0_PLAF7	80893.5	136655	141249	111656	140467	136183	136655	136183	0.280928	0.120105	-0.00499684	0	0	0.561968
tr|O96121|O96121_PLAF7	O96121	PF3D7_0201600	PHISTb domain-containing RESA-like protein 1 OS=Plasmodium falciparum (isolate 3D7) OX=36329 GN=PF3D7_0201600 PE=4 SV=2	187.85	0	5	tr|O96121|O96121_PLAF7	6.08403e+06	3.21961e+06	3.173e+06	4.80928e+06	4.00148e+06	4.58851e+06	3.21961e+06	4.58851e+06	0.400924	0.0934773	0.511139	0	0	0.562133
tr|Q8IDM2|Q8IDM2_PLAF7	Q8IDM2	PF3D7_1347700	Ethanolamine-phosphate cytidylyltransferase OS=Plasmodium falciparum (isolate 3D7) OX=36329 GN=PF3D7_1347700 PE=4 SV=1	414.22	0	13	tr|Q8IDM2|Q8IDM2_PLAF7	3.76101e+06	7.19666e+06	7.37e+06	6.17903e+06	6.44844e+06	7.12611e+06	7.19666e+06	6.44844e+06	0.333178	0.074111	-0.158377	0.0222222	0	0.564366
tr|Q8I630|Q8I630_PLAF7	Q8I630	PF3D7_1201500	XPA binding protein 1, putative OS=Plasmodium falciparum (isolate 3D7) OX=36329 GN=PF3D7_1201500 PE=4 SV=1	133.13	0	6	tr|Q8I630|Q8I630_PLAF7	2.32067e+06	2.28955e+06	2.25302e+06	2.39612e+06	2.2614e+06	1.88577e+06	2.28955e+06	2.2614e+06	0.0147998	0.121259	-0.0178493	0	0	0.566404
tr|Q8IAX8|Q8IAX8_PLAF7	Q8IAX8	PF3D7_0814200	DNA/RNA-binding protein Alba 1 OS=Plasmodium falciparum (isolate 3D7) OX=36329 GN=PF3D7_0814200 PE=4 SV=1	1155.92	0	17	tr|Q8IAX8|Q8IAX8_PLAF7	6.96397e+08	5.07386e+08	5.05338e+08	5.67027e+08	5.12424e+08	5.0163e+08	5.07386e+08	5.12424e+08	0.192593	0.066522	0.0142549	0.147059	0.0686275	0.566667
tr|Q8IDQ2|Q8IDQ2_PLAF7	Q8IDQ2	PF3D7_1343700	Kelch protein K13 OS=Plasmodium falciparum (isolate 3D7) OX=36329 GN=PF3D7_1343700 PE=1 SV=1	479.46	0	15	tr|Q8IDQ2|Q8IDQ2_PLAF7	1.27303e+07	1.08455e+07	1.06707e+07	1.24812e+07	1.12741e+07	1.21615e+07	1.08455e+07	1.21615e+07	0.100035	0.0522391	0.165219	0	0.0196078	0.566988
tr|O96271|O96271_PLAF7	O96271	PF3D7_0219600	Replication factor C subunit 1 OS=Plasmodium falciparum (isolate 3D7) OX=36329 GN=PF3D7_0219600 PE=3 SV=1	1124.55	0	25	tr|O96271|O96271_PLAF7	2.35448e+07	1.77906e+07	1.76953e+07	1.80986e+07	1.89495e+07	1.80038e+07	1.77906e+07	1.80986e+07	0.170252	0.0283783	0.0247623	0	0.0107527	0.56724
tr|Q8IKP5|Q8IKP5_PLAF7	Q8IKP5	PF3D7_1458600	C2H2-type domain-containing protein OS=Plasmodium falciparum (isolate 3D7) OX=36329 GN=PF3D7_1458600 PE=4 SV=1	79.65	0	2	tr|Q8IKP5|Q8IKP5_PLAF7	155521	110346	133749	170991	115124	150257	133749	150257	0.169607	0.194156	0.167907	0	0	0.56726
tr|Q8I441|Q8I441_PLAF7	Q8I441	PF3D7_0506100	60S ribosomal subunit protein L24-2, putative OS=Plasmodium falciparum (isolate 3D7) OX=36329 GN=PF3D7_0506100 PE=4 SV=1	61.89	0.000821018	2	tr|Q8I441|Q8I441_PLAF7	1.4339e+06	1.32193e+06	1.25893e+06	1.33263e+06	1.83007e+06	1.22148e+06	1.32193e+06	1.33263e+06	0.0662231	0.221763	0.011629	0.111111	0	0.56787
tr|Q8IJE1|Q8IJE1_PLAF7	Q8IJE1	PF3D7_1026000	Uncharacterized protein OS=Plasmodium falciparum (isolate 3D7) OX=36329 GN=PF3D7_1026000 PE=4 SV=2	206.81	0	7	tr|Q8IJE1|Q8IJE1_PLAF7	3.45116e+06	4.81389e+06	3.58469e+06	4.22619e+06	4.21032e+06	4.06356e+06	3.58469e+06	4.21032e+06	0.190181	0.0215197	0.232081	0.0833333	0.0416667	0.568231
tr|C0H4W2|C0H4W2_PLAF7	C0H4W2	LSM3	U6 snRNA-associated Sm-like protein LSm3 OS=Plasmodium falciparum (isolate 3D7) OX=36329 GN=LSM3 PE=3 SV=1	176.64	0	3	tr|C0H4W2|C0H4W2_PLAF7	5.61325e+06	4.10193e+06	2.85534e+06	4.1882e+06	3.66581e+06	3.05996e+06	4.10193e+06	3.66581e+06	0.329598	0.155205	-0.162172	0	0	0.569338
tr|Q8IBU0|Q8IBU0_PLAF7	Q8IBU0	PF3D7_0716000	RNA-binding protein, putative OS=Plasmodium falciparum (isolate 3D7) OX=36329 GN=PF3D7_0716000 PE=4 SV=1	105.76	0	3	tr|Q8IBU0|Q8IBU0_PLAF7	653929	495492	586574	540087	701885	611669	586574	611669	0.13741	0.131219	0.0604379	0	0	0.5697
tr|Q8I3I6|Q8I3I6_PLAF7	Q8I3I6	PF3D7_0528100	AP complex subunit beta OS=Plasmodium falciparum (isolate 3D7) OX=36329 GN=PF3D7_0528100 PE=3 SV=2	495.25	0	9	tr|Q8I3I6|Q8I3I6_PLAF7	5.40104e+06	3.88135e+06	4.01414e+06	4.40566e+06	4.12437e+06	3.78123e+06	4.01414e+06	4.12437e+06	0.189903	0.0762045	0.0390814	0.0952381	0.0238095	0.569759
tr|C0H4A7|C0H4A7_PLAF7	C0H4A7	PF3D7_0416400	Histone acetyltransferase, putative OS=Plasmodium falciparum (isolate 3D7) OX=36329 GN=PF3D7_0416400 PE=4 SV=1	261.71	0	7	tr|C0H4A7|C0H4A7_PLAF7	1.21608e+06	2.01396e+06	1.79547e+06	1.66127e+06	1.92601e+06	1.78056e+06	1.79547e+06	1.78056e+06	0.246136	0.074099	-0.0120272	0	0	0.569906
tr|C0H4C2|C0H4C2_PLAF7	C0H4C2	PF3D7_0502700	Uncharacterized protein OS=Plasmodium falciparum (isolate 3D7) OX=36329 GN=PF3D7_0502700 PE=4 SV=1	39.24	0.00356379	2	tr|C0H4C2|C0H4C2_PLAF7	2.52637e+06	1.97763e+06	1.5627e+06	2.08815e+06	2.13242e+06	2.21721e+06	1.97763e+06	2.13242e+06	0.239032	0.0305616	0.108716	0	0	0.570014
tr|C0H4X1|C0H4X1_PLAF7	C0H4X1	PF3D7_0822800	U5 snrnp-specific protein, putative OS=Plasmodium falciparum (isolate 3D7) OX=36329 GN=PF3D7_0822800 PE=4 SV=1	54.82	0.000791766	2	tr|C0H4X1|C0H4X1_PLAF7	1.61245e+06	1.55903e+06	1.3697e+06	1.44371e+06	1.64891e+06	1.68608e+06	1.55903e+06	1.64891e+06	0.0842676	0.0819459	0.0808637	0	0	0.57077
tr|Q8IAL3|Q8IAL3_PLAF7	Q8IAL3	PF3D7_0801500	Nucleolar protein 10, putative OS=Plasmodium falciparum (isolate 3D7) OX=36329 GN=PF3D7_0801500 PE=4 SV=1	97.66	0	2	tr|Q8IAL3|Q8IAL3_PLAF7	464767	536837	445207	436762	508898	610385	464767	508898	0.100063	0.168165	0.130869	0	0	0.570824
tr|Q8IKY7|Q8IKY7_PLAF7	Q8IKY7	PF3D7_1448600	SNARE protein, putative OS=Plasmodium falciparum (isolate 3D7) OX=36329 GN=PF3D7_1448600 PE=4 SV=1	79.01	0	2	tr|Q8IKY7|Q8IKY7_PLAF7	508082	817010	774120	806155	934885	586260	774120	806155	0.239172	0.227243	0.0584995	0	0	0.57116
tr|Q8IE41|Q8IE41_PLAF7	Q8IE41	PF3D7_1328000	Uncharacterized protein OS=Plasmodium falciparum (isolate 3D7) OX=36329 GN=PF3D7_1328000 PE=4 SV=1	43.82	0.00220913	2	tr|Q8IE41|Q8IE41_PLAF7	185965	107823	82765.2	104909	135714	179091	107823	135714	0.42884	0.266383	0.331903	0	0	0.571289
tr|A0A144A0J9|A0A144A0J9_PLAF7	A0A144A0J9	PF3D7_1202600	Uncharacterized protein OS=Plasmodium falciparum (isolate 3D7) OX=36329 GN=PF3D7_1202600 PE=4 SV=1	191.48	0	4	tr|A0A144A0J9|A0A144A0J9_PLAF7	1.40619e+06	2.65778e+06	2.137e+06	1.62384e+06	1.80852e+06	2.00223e+06	2.137e+06	1.80852e+06	0.304173	0.10445	-0.240774	0.0833333	0	0.57384
tr|Q8IBV7|Q8IBV7_PLAF7	Q8IBV7	PF3D7_0714000	Histone H2B OS=Plasmodium falciparum (isolate 3D7) OX=36329 GN=PF3D7_0714000 PE=3 SV=1	730.58	0	8	tr|Q8IBV7|Q8IBV7_PLAF7	1.69571e+08	1.11288e+08	1.21415e+08	1.48446e+08	1.12936e+08	1.04725e+08	1.21415e+08	1.12936e+08	0.232232	0.190418	-0.104435	0.0222222	0	0.574334
tr|Q76NL8|Q76NL8_PLAF7	Q76NL8	PF3D7_1360800	Falcilysin OS=Plasmodium falciparum (isolate 3D7) OX=36329 GN=PF3D7_1360800 PE=1 SV=1	2394.3	0	56	tr|Q76NL8|Q76NL8_PLAF7	1.31029e+08	1.13335e+08	1.27209e+08	1.08972e+08	1.17875e+08	1.27153e+08	1.27209e+08	1.17875e+08	0.0751742	0.0770422	-0.109939	0.0177778	0.00888889	0.574884
tr|Q9U0N4|Q9U0N4_PLAF7	Q9U0N4	PF3D7_0112200	Multidrug resistance-associated protein 1 OS=Plasmodium falciparum (isolate 3D7) OX=36329 GN=PF3D7_0112200 PE=4 SV=1	431.1	0	16	tr|Q9U0N4|Q9U0N4_PLAF7	9.94245e+06	6.87309e+06	7.21129e+06	8.38487e+06	8.05595e+06	8.97542e+06	7.21129e+06	8.38487e+06	0.210138	0.0549924	0.217532	0	0.0208333	0.575109
tr|Q8III5|Q8III5_PLAF7	Q8III5	PF3D7_1118300	Insulinase, putative OS=Plasmodium falciparum (isolate 3D7) OX=36329 GN=PF3D7_1118300 PE=4 SV=1	1191.57	0	30	tr|Q8III5|Q8III5_PLAF7	2.61103e+07	2.62154e+07	3.04643e+07	2.53622e+07	2.50734e+07	2.83312e+07	2.62154e+07	2.53622e+07	0.0900105	0.0686829	-0.047732	0.0294118	0.0294118	0.57583
tr|O96258|O96258_PLAF7	O96258	PF3D7_0217800	40S ribosomal protein S26 OS=Plasmodium falciparum (isolate 3D7) OX=36329 GN=PF3D7_0217800 PE=1 SV=1	234.43	0	6	tr|O96258|O96258_PLAF7	8.51256e+07	6.02548e+07	6.52152e+07	6.358e+07	6.17663e+07	7.00815e+07	6.52152e+07	6.358e+07	0.187511	0.0671183	-0.0366366	0	0	0.578231
tr|Q8I3Q8|Q8I3Q8_PLAF7	Q8I3Q8	PF3D7_0520200	Uncharacterized protein OS=Plasmodium falciparum (isolate 3D7) OX=36329 GN=PF3D7_0520200 PE=4 SV=1	154.06	0	4	tr|Q8I3Q8|Q8I3Q8_PLAF7	388386	566487	475858	391703	425419	504760	475858	425419	0.186734	0.131727	-0.161646	0.0666667	0.0666667	0.580316
tr|Q8IKP3|Q8IKP3_PLAF7	Q8IKP3	PF3D7_1458800	DNA-directed RNA polymerase III subunit RPC5,putative OS=Plasmodium falciparum (isolate 3D7) OX=36329 GN=PF3D7_1458800 PE=4 SV=1	65.46	0.000833333	2	tr|Q8IKP3|Q8IKP3_PLAF7	176344	56388.5	69555.6	84397	70344	69451.6	69555.6	70344	0.652875	0.112176	0.0162607	0.5	0.166667	0.581221
tr|Q8IAZ3|Q8IAZ3_PLAF7	Q8IAZ3	PF3D7_0815600	Eukaryotic translation initiation factor 3 subunit G OS=Plasmodium falciparum (isolate 3D7) OX=36329 GN=PF3D7_0815600 PE=3 SV=2	415.95	0	13	tr|Q8IAZ3|Q8IAZ3_PLAF7	5.4111e+07	3.32455e+07	3.33711e+07	3.39799e+07	3.67886e+07	3.70909e+07	3.33711e+07	3.67886e+07	0.298456	0.0477162	0.140663	0.0444444	0.0222222	0.581287
tr|Q7KQJ9|Q7KQJ9_PLAF7	Q7KQJ9	PF3D7_1226600	Proliferating cell nuclear antigen OS=Plasmodium falciparum (isolate 3D7) OX=36329 GN=PF3D7_1226600 PE=3 SV=1	201.09	0	7	tr|Q7KQJ9|Q7KQJ9_PLAF7	1.92475e+07	2.26772e+07	2.35878e+07	2.12334e+07	2.19271e+07	2.61968e+07	2.26772e+07	2.19271e+07	0.104808	0.116261	-0.0485248	0	0	0.58247
tr|Q8I535|Q8I535_PLAF7	Q8I535	PF3D7_1238800	Acyl-CoA synthetase OS=Plasmodium falciparum (isolate 3D7) OX=36329 GN=PF3D7_1238800 PE=4 SV=1	881.42	0	25	tr|Q8I535|Q8I535_PLAF7	5.85206e+07	3.80834e+07	3.96428e+07	3.67313e+07	3.95849e+07	4.74256e+07	3.96428e+07	3.95849e+07	0.250487	0.134252	-0.00210822	0.0595238	0	0.582596
tr|Q8I5K1|Q8I5K1_PLAF7	Q8I5K1	PF3D7_1221200	Uncharacterized protein OS=Plasmodium falciparum (isolate 3D7) OX=36329 GN=PF3D7_1221200 PE=4 SV=1	62.63	0.000823045	2	tr|Q8I5K1|Q8I5K1_PLAF7	7.4028e+06	4.98208e+06	5.0191e+06	6.00126e+06	5.09021e+06	4.79382e+06	5.0191e+06	5.09021e+06	0.23909	0.118837	0.0202971	0.166667	0	0.584895
tr|Q8IB72|Q8IB72_PLAF7	Q8IB72	PF3D7_0823800	DnaJ protein, putative OS=Plasmodium falciparum (isolate 3D7) OX=36329 GN=PF3D7_0823800 PE=4 SV=1	966.3	0	24	tr|Q8IB72|Q8IB72_PLAF7	4.76259e+07	3.5498e+07	3.5558e+07	4.61103e+07	3.8901e+07	4.05393e+07	3.5558e+07	4.05393e+07	0.17656	0.0903034	0.189148	0.0123457	0	0.585157
tr|Q8IEB3|Q8IEB3_PLAF7	Q8IEB3	PF3D7_1320000	Golgi protein 1 OS=Plasmodium falciparum (isolate 3D7) OX=36329 GN=PF3D7_1320000 PE=4 SV=1	339.84	0	8	tr|Q8IEB3|Q8IEB3_PLAF7	2.58274e+06	1.86738e+06	1.90257e+06	1.87401e+06	1.86611e+06	2.15766e+06	1.90257e+06	1.87401e+06	0.190427	0.084485	-0.0218155	0.030303	0	0.586306
tr|Q8IKJ1|Q8IKJ1_PLAF7	Q8IKJ1	PF3D7_1464600	Serine/threonine protein phosphatase UIS2,putative OS=Plasmodium falciparum (isolate 3D7) OX=36329 GN=PF3D7_1464600 PE=4 SV=2	880.45	0	19	tr|Q8IKJ1|Q8IKJ1_PLAF7	7.93369e+06	6.58826e+06	7.1426e+06	6.88141e+06	7.59512e+06	8.33387e+06	7.1426e+06	7.59512e+06	0.0936335	0.0955176	0.0886233	0.101449	0.0724638	0.586762
tr|Q8IJU4|Q8IJU4_PLAF7	Q8IJU4	PF3D7_1010100	PI31_Prot_N domain-containing protein OS=Plasmodium falciparum (isolate 3D7) OX=36329 GN=PF3D7_1010100 PE=4 SV=1	66.33	0.00083612	2	tr|Q8IJU4|Q8IJU4_PLAF7	2.80221e+06	1.8279e+06	2.10163e+06	1.87928e+06	1.9872e+06	2.30384e+06	2.10163e+06	1.9872e+06	0.223939	0.107287	-0.0807708	0	0	0.586892
tr|Q8IIW1|Q8IIW1_PLAF7	Q8IIW1	PF3D7_1104100	Syntaxin, Qa-SNARE family OS=Plasmodium falciparum (isolate 3D7) OX=36329 GN=PF3D7_1104100 PE=4 SV=2	151.37	0	5	tr|Q8IIW1|Q8IIW1_PLAF7	7.32145e+06	5.22009e+06	4.99393e+06	5.50127e+06	5.17681e+06	5.47066e+06	5.22009e+06	5.47066e+06	0.219584	0.0332809	0.0676413	0	0	0.587603
tr|Q8ILB9|Q8ILB9_PLAF7	Q8ILB9	PF3D7_1434500	Dynein-related AAA-type ATPase, putative OS=Plasmodium falciparum (isolate 3D7) OX=36329 GN=PF3D7_1434500 PE=4 SV=2	79.13	0	2	tr|Q8ILB9|Q8ILB9_PLAF7	314592	124507	112175	144038	123008	153667	124507	144038	0.617514	0.111803	0.210223	0	0	0.587863
tr|A0A144A1V5|A0A144A1V5_PLAF7	A0A144A1V5	PF3D7_1202100.2	Uncharacterized protein OS=Plasmodium falciparum (isolate 3D7) OX=36329 GN=PF3D7_1202100.2 PE=4 SV=1	252.84	0	7	tr|A0A144A1V5|A0A144A1V5_PLAF7	2.51125e+06	3.87974e+06	2.78618e+06	2.67124e+06	3.59282e+06	3.64766e+06	2.78618e+06	3.59282e+06	0.236644	0.166043	0.366827	0	0	0.589919
tr|Q9U0I0|Q9U0I0_PLAF7	Q9U0I0	PF3D7_0410800	Uncharacterized protein OS=Plasmodium falciparum (isolate 3D7) OX=36329 GN=PF3D7_0410800 PE=4 SV=1	57.41	0.000804505	2	tr|Q9U0I0|Q9U0I0_PLAF7	109518	461988	350953	401867	425631	208443	350953	401867	0.586077	0.344983	0.19544	0	0	0.590004
tr|Q8I5F3|Q8I5F3_PLAF7	Q8I5F3	PF3D7_1226400	Mic1 domain-containing protein OS=Plasmodium falciparum (isolate 3D7) OX=36329 GN=PF3D7_1226400 PE=4 SV=2	111.27	0	3	tr|Q8I5F3|Q8I5F3_PLAF7	1.65997e+06	1.0238e+06	1.10026e+06	946642	1.11995e+06	1.34166e+06	1.10026e+06	1.11995e+06	0.275364	0.174283	0.0255886	0	0	0.590103
tr|Q8IDZ9|Q8IDZ9_PLAF7	Q8IDZ9	PF3D7_1332900	Isoleucine--tRNA ligase, putative OS=Plasmodium falciparum (isolate 3D7) OX=36329 GN=PF3D7_1332900 PE=3 SV=1	948.51	0	34	tr|Q8IDZ9|Q8IDZ9_PLAF7	7.39023e+07	7.05478e+07	7.73937e+07	6.70322e+07	6.60432e+07	7.92068e+07	7.39023e+07	6.70322e+07	0.0462918	0.103606	-0.140766	0.0263158	0.00877193	0.590965
tr|Q8IKV2|Q8IKV2_PLAF7	Q8IKV2	PF3D7_1452400	Uncharacterized protein OS=Plasmodium falciparum (isolate 3D7) OX=36329 GN=PF3D7_1452400 PE=4 SV=1	49.94	0.000769231	2	tr|Q8IKV2|Q8IKV2_PLAF7	494864	390923	441356	440058	479888	468922	441356	468922	0.117496	0.0444409	0.087403	0	0	0.591081
tr|C6S3I6|C6S3I6_PLAF7	C6S3I6	PF3D7_1442100	Replication factor A protein 3, putative OS=Plasmodium falciparum (isolate 3D7) OX=36329 GN=PF3D7_1442100 PE=4 SV=1	53.24	0.000783699	3	tr|C6S3I6|C6S3I6_PLAF7	3.834e+06	6.54633e+06	5.8464e+06	5.72599e+06	4.92107e+06	3.883e+06	5.8464e+06	4.92107e+06	0.260328	0.190767	-0.248577	0	0	0.592377
tr|Q8ILL4|Q8ILL4_PLAF7	Q8ILL4	PF3D7_1423800	Vacuolar protein sorting-associated protein 3,putative OS=Plasmodium falciparum (isolate 3D7) OX=36329 GN=PF3D7_1423800 PE=4 SV=2	34.42	0.00685871	2	tr|Q8ILL4|Q8ILL4_PLAF7	582705	371218	379681	528700	393407	513671	379681	513671	0.269347	0.154944	0.436056	0	0	0.592589
tr|Q8IK89|Q8IK89_PLAF7	Q8IK89	PF3D7_1474900	Trailer hitch homolog, putative OS=Plasmodium falciparum (isolate 3D7) OX=36329 GN=PF3D7_1474900 PE=4 SV=1	447.49	0	11	tr|Q8IK89|Q8IK89_PLAF7	9.89135e+06	1.55446e+07	1.40584e+07	9.8284e+06	1.32105e+07	1.29183e+07	1.40584e+07	1.29183e+07	0.222614	0.156354	-0.122013	0	0	0.592666
sp|Q8I423|PF38_PLAF7	Q8I423	PFS38	Merozoite surface protein P38 OS=Plasmodium falciparum (isolate 3D7) OX=36329 GN=PFS38 PE=1 SV=1	47.02	0.0015015	1	sp|Q8I423|PF38_PLAF7	332138	387499	305432	566052	281600	138958	332138	281600	0.122507	0.661159	-0.238134	0	0	0.59409
tr|Q8I488|Q8I488_PLAF7	Q8I488	PF3D7_0501200	Parasite-infected erythrocyte surface protein OS=Plasmodium falciparum (isolate 3D7) OX=36329 GN=PF3D7_0501200 PE=4 SV=1	682.49	0	12	tr|Q8I488|Q8I488_PLAF7	4.27279e+07	3.30982e+07	2.85263e+07	3.66316e+07	3.77883e+07	3.5447e+07	3.30982e+07	3.66316e+07	0.208409	0.0319656	0.146339	0.0980392	0.0784314	0.594437
tr|Q8IL72|Q8IL72_PLAF7	Q8IL72	PF3D7_1439700	Leucine carboxyl methyltransferase 1 OS=Plasmodium falciparum (isolate 3D7) OX=36329 GN=PF3D7_1439700 PE=3 SV=2	79.21	0	2	tr|Q8IL72|Q8IL72_PLAF7	1.76559e+06	1.48763e+06	1.68168e+06	1.69249e+06	1.42412e+06	1.58426e+06	1.68168e+06	1.58426e+06	0.08667	0.0861684	-0.086091	0	0	0.594788
tr|C6KSV3|C6KSV3_PLAF7	C6KSV3	PF3D7_0610800	Transketolase OS=Plasmodium falciparum (isolate 3D7) OX=36329 GN=PF3D7_0610800 PE=4 SV=1	1270.23	0	31	tr|C6KSV3|C6KSV3_PLAF7	1.16173e+08	1.21001e+08	1.30614e+08	1.21749e+08	1.12044e+08	1.19129e+08	1.21001e+08	1.19129e+08	0.0599647	0.0426786	-0.0224912	0.0310078	0	0.595751
tr|Q8I3I7|Q8I3I7_PLAF7	Q8I3I7	PF3D7_0528000	Proteasome maturation factor UMP1, putative OS=Plasmodium falciparum (isolate 3D7) OX=36329 GN=PF3D7_0528000 PE=4 SV=1	176.47	0	4	tr|Q8I3I7|Q8I3I7_PLAF7	846722	1.33161e+06	1.2295e+06	908483	1.13802e+06	1.05869e+06	1.2295e+06	1.05869e+06	0.225032	0.112627	-0.2158	0.142857	0.190476	0.596089
tr|Q8IBD0|Q8IBD0_PLAF7	Q8IBD0	PF3D7_0830400	Uncharacterized protein OS=Plasmodium falciparum (isolate 3D7) OX=36329 GN=PF3D7_0830400 PE=4 SV=1	322.18	0	5	tr|Q8IBD0|Q8IBD0_PLAF7	6.41185e+06	6.45098e+06	6.80591e+06	5.47567e+06	6.87343e+06	6.47629e+06	6.45098e+06	6.47629e+06	0.0331133	0.114781	0.00564924	0.0416667	0.0416667	0.596485
tr|Q8IHW7|Q8IHW7_PLAF7	Q8IHW7	PF3D7_1139900	Uncharacterized protein OS=Plasmodium falciparum (isolate 3D7) OX=36329 GN=PF3D7_1139900 PE=4 SV=1	41.18	0.00361533	2	tr|Q8IHW7|Q8IHW7_PLAF7	453378	281878	316214	377049	314578	441456	316214	377049	0.258902	0.16797	0.25385	0	0	0.59663
tr|Q8IAZ7|Q8IAZ7_PLAF7	Q8IAZ7	PF3D7_0816000	Ribosome assembly protein RRB1, putative OS=Plasmodium falciparum (isolate 3D7) OX=36329 GN=PF3D7_0816000 PE=4 SV=1	53.35	0.000784314	2	tr|Q8IAZ7|Q8IAZ7_PLAF7	342295	234786	254227	254188	318426	312127	254227	312127	0.206743	0.120068	0.29602	0	0	0.598031
sp|Q8IDF6|PURA_PLAF7	Q8IDF6	Adss	Adenylosuccinate synthetase OS=Plasmodium falciparum (isolate 3D7) OX=36329 GN=Adss PE=3 SV=1	848.44	0	22	sp|Q8IDF6|PURA_PLAF7	4.40851e+07	4.04816e+07	4.47931e+07	4.22295e+07	3.83393e+07	4.35423e+07	4.40851e+07	4.22295e+07	0.0536207	0.0654049	-0.0620388	0.0357143	0.0595238	0.599408
tr|Q8IJR6|Q8IJR6_PLAF7	Q8IJR6	PF3D7_1012900	Autophagy-related protein 18, putative OS=Plasmodium falciparum (isolate 3D7) OX=36329 GN=PF3D7_1012900 PE=4 SV=1	304.69	0	9	tr|Q8IJR6|Q8IJR6_PLAF7	1.76208e+07	9.96124e+06	1.0985e+07	1.52658e+07	1.16688e+07	1.43561e+07	1.0985e+07	1.43561e+07	0.323464	0.135887	0.38613	0	0	0.599548
tr|Q7KQL4|Q7KQL4_PLAF7	Q7KQL4	PF3D7_1017000	DNA polymerase OS=Plasmodium falciparum (isolate 3D7) OX=36329 GN=PF3D7_1017000 PE=3 SV=1	522.66	0	13	tr|Q7KQL4|Q7KQL4_PLAF7	3.85925e+06	4.53203e+06	5.17608e+06	4.23058e+06	5.17072e+06	4.93651e+06	4.53203e+06	4.93651e+06	0.145599	0.1024	0.123335	0	0.047619	0.599687
tr|Q8I2D5|Q8I2D5_PLAF7	Q8I2D5	PF3D7_0114500	Uncharacterized protein OS=Plasmodium falciparum (isolate 3D7) OX=36329 GN=PF3D7_0114500 PE=4 SV=1	69.7	0.000845309	2	tr|Q8I2D5|Q8I2D5_PLAF7	3.04244e+06	2.12236e+06	1.81386e+06	3.07338e+06	2.44808e+06	2.05934e+06	2.12236e+06	2.44808e+06	0.274762	0.202457	0.205983	0	0	0.599774
tr|A0A144A323|A0A144A323_PLAF7	A0A144A323	PF3D7_1419800.1	Glutathione reductase OS=Plasmodium falciparum (isolate 3D7) OX=36329 GN=PF3D7_1419800.1 PE=3 SV=1	949.26	0	24	tr|A0A144A323|A0A144A323_PLAF7	2.54418e+07	2.60233e+07	2.85253e+07	2.29854e+07	2.52857e+07	2.82205e+07	2.60233e+07	2.52857e+07	0.0614478	0.102913	-0.0414777	0.0123457	0.0246914	0.599962
tr|A0A146M1M7|A0A146M1M7_PLAF7	A0A146M1M7	PF3D7_1371800	Uncharacterized protein OS=Plasmodium falciparum (isolate 3D7) OX=36329 GN=PF3D7_1371800 PE=4 SV=1	36.37	0.00558659	1	tr|A0A146M1M7|A0A146M1M7_PLAF7	139625	96461.5	96441.7	153856	120197	92789.5	96461.5	120197	0.224881	0.250135	0.317373	0	0	0.600047
tr|C0H5H5|C0H5H5_PLAF7	C0H5H5	PF3D7_1345900	Kinetochore protein SPC25, putative OS=Plasmodium falciparum (isolate 3D7) OX=36329 GN=PF3D7_1345900 PE=4 SV=1	132.36	0	4	tr|C0H5H5|C0H5H5_PLAF7	1.6644e+06	1.66482e+06	1.84224e+06	1.46714e+06	1.70882e+06	1.77225e+06	1.66482e+06	1.70882e+06	0.0594919	0.0976122	0.0376377	0	0	0.601588
tr|Q8I238|Q8I238_PLAF7	Q8I238	PF3D7_0110700	Chromatin assembly factor 1 protein WD40 domain,putative OS=Plasmodium falciparum (isolate 3D7) OX=36329 GN=PF3D7_0110700 PE=4 SV=1	618.94	0	15	tr|Q8I238|Q8I238_PLAF7	7.25175e+07	8.32808e+07	8.78077e+07	7.57483e+07	7.61915e+07	8.04491e+07	8.32808e+07	7.61915e+07	0.0967242	0.0335073	-0.128353	0.0166667	0	0.60193
sp|Q8IAW3|RU1C_PLAF7	Q8IAW3	PF08_0084	U1 small nuclear ribonucleoprotein C OS=Plasmodium falciparum (isolate 3D7) OX=36329 GN=PF08_0084 PE=3 SV=1	38.26	0.00424328	1	sp|Q8IAW3|RU1C_PLAF7	201453	300345	320440	147569	297560	300536	300345	297560	0.23239	0.35191	-0.0134379	0	0	0.602489
tr|O97255|O97255_PLAF7	O97255	PF3D7_0307700	Uncharacterized protein OS=Plasmodium falciparum (isolate 3D7) OX=36329 GN=PF3D7_0307700 PE=4 SV=2	44.7	0.00147929	2	tr|O97255|O97255_PLAF7	483236	828047	702416	419272	727410	663591	702416	663591	0.259981	0.269531	-0.0820311	0.166667	0	0.603569
tr|Q8I463|Q8I463_PLAF7	Q8I463	PF3D7_0503800	60S ribosomal protein L31 OS=Plasmodium falciparum (isolate 3D7) OX=36329 GN=PF3D7_0503800 PE=1 SV=1	95.79	0	3	tr|Q8I463|Q8I463_PLAF7	2.25687e+07	2.55164e+07	2.87401e+07	2.62348e+07	2.61513e+07	2.7826e+07	2.55164e+07	2.62348e+07	0.120536	0.0352958	0.0400584	0	0	0.604087
tr|Q8I457|Q8I457_PLAF7	Q8I457	PF3D7_0504400	ATP-dependent helicase, putative OS=Plasmodium falciparum (isolate 3D7) OX=36329 GN=PF3D7_0504400 PE=3 SV=1	31.4	0.00936455	1	tr|Q8I457|Q8I457_PLAF7	4.58114e+06	3.04669e+06	3.44261e+06	3.16418e+06	3.25304e+06	3.79965e+06	3.44261e+06	3.25304e+06	0.215875	0.101045	-0.0817148	0	0	0.605377
tr|O96183|O96183_PLAF7	O96183	PF3D7_0210000	Secretory complex protein 61 gamma subunit OS=Plasmodium falciparum (isolate 3D7) OX=36329 GN=PF3D7_0210000 PE=3 SV=1	49.15	0.000763942	1	tr|O96183|O96183_PLAF7	4.48507e+07	1.41132e+07	9.65159e+06	2.28463e+07	1.17482e+07	1.1422e+07	1.41132e+07	1.17482e+07	0.837911	0.424002	-0.264606	0	0	0.605908
tr|Q8IIR0|Q8IIR0_PLAF7	Q8IIR0	PF3D7_1110200	Pre-mRNA-processing factor 6, putative OS=Plasmodium falciparum (isolate 3D7) OX=36329 GN=PF3D7_1110200 PE=4 SV=1	113.52	0	3	tr|Q8IIR0|Q8IIR0_PLAF7	1.09841e+06	974804	834165	665118	993655	1.05976e+06	974804	993655	0.136424	0.233248	0.027633	0	0	0.60654
tr|Q8IE68|Q8IE68_PLAF7	Q8IE68	PF3D7_1325000	U6 snRNA-associated Sm-like protein LSm6,putative OS=Plasmodium falciparum (isolate 3D7) OX=36329 GN=PF3D7_1325000 PE=3 SV=1	111.87	0	3	tr|Q8IE68|Q8IE68_PLAF7	5.12017e+06	5.21496e+06	5.04537e+06	5.81019e+06	5.06365e+06	3.75092e+06	5.12017e+06	5.06365e+06	0.016577	0.213855	-0.0160127	0	0	0.608431
tr|Q8IDY0|Q8IDY0_PLAF7	Q8IDY0	PF3D7_1334800	MSP7-like protein OS=Plasmodium falciparum (isolate 3D7) OX=36329 GN=PF3D7_1334800 PE=4 SV=1	134.83	0	5	tr|Q8IDY0|Q8IDY0_PLAF7	454506	1.69143e+06	1.73114e+06	1.01779e+06	1.79293e+06	1.36672e+06	1.69143e+06	1.36672e+06	0.561666	0.278792	-0.307526	0	0	0.608605
tr|Q8I266|Q8I266_PLAF7	Q8I266	PF3D7_0107500	Lipid/sterol:H+ symporter OS=Plasmodium falciparum (isolate 3D7) OX=36329 GN=PF3D7_0107500 PE=4 SV=1	397.6	0	15	tr|Q8I266|Q8I266_PLAF7	1.1822e+07	7.75191e+06	7.96672e+06	9.80405e+06	9.04785e+06	1.01724e+07	7.96672e+06	9.80405e+06	0.249492	0.0592571	0.299393	0.0222222	0	0.608897
tr|A0A143ZWD4|A0A143ZWD4_PLAF7	A0A143ZWD4	PF3D7_0700800	Pfmc-2TM Maurer's cleft two transmembrane protein OS=Plasmodium falciparum (isolate 3D7) OX=36329 GN=PF3D7_0700800 PE=4 SV=1	54.84	0.000792393	2	tr|A0A143ZWD4|A0A143ZWD4_PLAF7	631599	510207	526128	634603	549277	563600	526128	563600	0.118659	0.0784441	0.0992572	0	0	0.609654
tr|Q8I324|Q8I324_PLAF7	Q8I324	PF3D7_0912800	tRNA (Adenine(58)-N(1))-methyltransferase non-catalytic subunit TRM6, putative OS=Plasmodium falciparum (isolate 3D7) OX=36329 GN=PF3D7_0912800 PE=4 SV=1	57.92	0.000807103	1	tr|Q8I324|Q8I324_PLAF7	167459	91793.5	96842	134810	119323	121909	96842	121909	0.356395	0.0661857	0.332105	0	0	0.61089
tr|Q8I626|Q8I626_PLAF7	Q8I626	PF3D7_1201900	Uncharacterized protein OS=Plasmodium falciparum (isolate 3D7) OX=36329 GN=PF3D7_1201900 PE=4 SV=1	46.64	0.00149589	1	tr|Q8I626|Q8I626_PLAF7	399337	310329	349781	440031	308195	246119	349781	308195	0.126291	0.298764	-0.182605	0	0	0.611283
tr|Q8ILQ3|Q8ILQ3_PLAF7	Q8ILQ3	PF3D7_1419700	Uncharacterized protein OS=Plasmodium falciparum (isolate 3D7) OX=36329 GN=PF3D7_1419700 PE=4 SV=1	741.58	0	15	tr|Q8ILQ3|Q8ILQ3_PLAF7	7.7289e+07	5.60459e+07	5.71926e+07	5.4618e+07	6.1892e+07	6.13421e+07	5.71926e+07	6.13421e+07	0.188122	0.0683189	0.101049	0.030303	0.0454545	0.611644
sp|P50250|SAHH_PLAF7	P50250	PFE1050w	Adenosylhomocysteinase OS=Plasmodium falciparum (isolate 3D7) OX=36329 GN=PFE1050w PE=1 SV=2	1454.09	0	27	sp|P50250|SAHH_PLAF7	1.88935e+08	1.97225e+08	2.01669e+08	1.74586e+08	1.88499e+08	2.02628e+08	1.97225e+08	1.88499e+08	0.0329855	0.0743564	-0.0652915	0.0232558	0.0232558	0.612241
sp|O00806|RLA2_PLAF7	O00806	MAL3P3.19	60S acidic ribosomal protein P2 OS=Plasmodium falciparum (isolate 3D7) OX=36329 GN=MAL3P3.19 PE=3 SV=1	604.65	0	9	sp|O00806|RLA2_PLAF7	7.99925e+07	5.0635e+07	4.21129e+07	6.83101e+07	4.66636e+07	3.76684e+07	5.0635e+07	4.66636e+07	0.345118	0.30955	-0.117837	0	0.047619	0.612396
tr|Q8IJD2|Q8IJD2_PLAF7	Q8IJD2	PF3D7_1027100	U3 small nucleolar ribonucleoprotein protein MPP10, putative OS=Plasmodium falciparum (isolate 3D7) OX=36329 GN=PF3D7_1027100 PE=4 SV=1	84.62	0	4	tr|Q8IJD2|Q8IJD2_PLAF7	285958	381603	247375	302979	373077	296495	285958	302979	0.226592	0.130997	0.0834153	0	0	0.61325
tr|Q8I2I8|Q8I2I8_PLAF7	Q8I2I8	PF3D7_0932800	CAS_CSE1 domain-containing protein OS=Plasmodium falciparum (isolate 3D7) OX=36329 GN=PF3D7_0932800 PE=4 SV=1	511.02	0	13	tr|Q8I2I8|Q8I2I8_PLAF7	1.16332e+07	9.42375e+06	1.05916e+07	8.84793e+06	9.47612e+06	1.16964e+07	1.05916e+07	9.47612e+06	0.104775	0.149552	-0.160547	0.0444444	0.0222222	0.613518
tr|Q8I3G2|Q8I3G2_PLAF7	Q8I3G2	PF3D7_0530600	XAP-5 DNA binding protein, putative OS=Plasmodium falciparum (isolate 3D7) OX=36329 GN=PF3D7_0530600 PE=4 SV=1	58.34	0.000810373	1	tr|Q8I3G2|Q8I3G2_PLAF7	341874	287042	332823	347899	439753	267060	332823	347899	0.0916936	0.245769	0.0639101	0	0	0.614016
tr|Q8IDM6|Q8IDM6_PLAF7	Q8IDM6	PF3D7_1347200	Nucleoside transporter 1 OS=Plasmodium falciparum (isolate 3D7) OX=36329 GN=PF3D7_1347200 PE=4 SV=1	91.13	0	3	tr|Q8IDM6|Q8IDM6_PLAF7	6.10033e+07	4.90786e+07	5.37517e+07	4.26943e+07	5.23496e+07	5.99848e+07	5.37517e+07	5.23496e+07	0.110026	0.167677	-0.0381313	0	0	0.61447
tr|Q8IL37|Q8IL37_PLAF7	Q8IL37	PF3D7_1443400	WD repeat-containing protein OS=Plasmodium falciparum (isolate 3D7) OX=36329 GN=PF3D7_1443400 PE=4 SV=1	36.7	0.00559832	1	tr|Q8IL37|Q8IL37_PLAF7	148042	144890	174626	162772	163418	115980	148042	162772	0.104806	0.184571	0.136844	0	0	0.615079
tr|Q8I1V0|Q8I1V0_PLAF7	Q8I1V0	PF3D7_0413700	Lysine decarboxylase-like protein, putative OS=Plasmodium falciparum (isolate 3D7) OX=36329 GN=PF3D7_0413700 PE=4 SV=1	288.03	0	7	tr|Q8I1V0|Q8I1V0_PLAF7	3.56295e+06	5.29207e+06	5.64353e+06	5.87765e+06	4.66252e+06	4.88855e+06	5.29207e+06	4.88855e+06	0.230447	0.125662	-0.114424	0.0333333	0.1	0.615256
tr|Q8I5G2|Q8I5G2_PLAF7	Q8I5G2	PF3D7_1225500	Small subunit rRNA processing factor, putative OS=Plasmodium falciparum (isolate 3D7) OX=36329 GN=PF3D7_1225500 PE=4 SV=1	48.26	0.00151057	1	tr|Q8I5G2|Q8I5G2_PLAF7	60591.5	174119	208585	151607	157814	152789	174119	152789	0.524051	0.021391	-0.188531	0	0	0.615396
tr|Q8IEP5|Q8IEP5_PLAF7	Q8IEP5	PF3D7_1307000	Exosome complex component RRP40, putative OS=Plasmodium falciparum (isolate 3D7) OX=36329 GN=PF3D7_1307000 PE=4 SV=1	31.46	0.00937082	1	tr|Q8IEP5|Q8IEP5_PLAF7	236099	255100	338944	320998	300894	256629	255100	300894	0.197763	0.112454	0.238194	0	0	0.615851
tr|C0H5B1|C0H5B1_PLAF7	C0H5B1	PF3D7_1312900	Eukaryotic translation initation factor 4 gamma OS=Plasmodium falciparum (isolate 3D7) OX=36329 GN=PF3D7_1312900 PE=4 SV=1	1033.89	0	31	tr|C0H5B1|C0H5B1_PLAF7	2.61423e+07	3.22706e+07	3.11627e+07	2.42064e+07	2.95525e+07	3.11762e+07	3.11627e+07	2.95525e+07	0.109372	0.12881	-0.0765417	0.045045	0.036036	0.616604
tr|C6KTB4|C6KTB4_PLAF7	C6KTB4	PF3D7_0627800	Acetyl-CoA synthetase, putative OS=Plasmodium falciparum (isolate 3D7) OX=36329 GN=PF3D7_0627800 PE=4 SV=1	632.67	0	14	tr|C6KTB4|C6KTB4_PLAF7	2.19418e+07	1.7343e+07	1.84926e+07	1.8947e+07	1.67638e+07	1.91429e+07	1.84926e+07	1.8947e+07	0.124269	0.0722281	0.0350234	0.0185185	0	0.616913
tr|Q8I0U8|Q8I0U8_PLAF7	Q8I0U8	PF3D7_0930300	Merozoite surface protein 1 OS=Plasmodium falciparum (isolate 3D7) OX=36329 GN=PF3D7_0930300 PE=4 SV=1	3434.2	0	82	tr|Q8I0U8|Q8I0U8_PLAF7	2.62219e+08	2.05795e+08	1.92433e+08	2.55341e+08	1.96725e+08	1.64779e+08	2.05795e+08	1.96725e+08	0.168255	0.223383	-0.065027	0.031746	0.031746	0.61697
tr|Q8ILK3|Q8ILK3_PLAF7	Q8ILK3	PF3D7_1426000	60S ribosomal protein L21 OS=Plasmodium falciparum (isolate 3D7) OX=36329 GN=PF3D7_1426000 PE=1 SV=1	467.58	0	12	tr|Q8ILK3|Q8ILK3_PLAF7	1.23745e+08	8.89361e+07	8.81978e+07	1.11075e+08	8.22007e+07	8.597e+07	8.89361e+07	8.597e+07	0.202543	0.168626	-0.0489354	0.0416667	0.0625	0.617394
tr|Q8IBY4|Q8IBY4_PLAF7	Q8IBY4	PF3D7_0710600	60S ribosomal protein L34 OS=Plasmodium falciparum (isolate 3D7) OX=36329 GN=PF3D7_0710600 PE=1 SV=1	114.79	0	5	tr|Q8IBY4|Q8IBY4_PLAF7	4.70684e+07	3.70986e+07	3.70914e+07	4.14612e+07	3.60273e+07	3.71982e+07	3.70986e+07	3.71982e+07	0.142459	0.0748076	0.00387019	0	0	0.617738
tr|A0A143ZXB9|A0A143ZXB9_PLAF7	A0A143ZXB9	PF3D7_0109950	Uncharacterized protein OS=Plasmodium falciparum (isolate 3D7) OX=36329 GN=PF3D7_0109950 PE=4 SV=1	126.97	0	3	tr|A0A143ZXB9|A0A143ZXB9_PLAF7	1.09444e+06	685943	546336	879761	716887	871927	685943	871927	0.367254	0.111632	0.346119	0	0	0.617908
tr|Q8IDC6|Q8IDC6_PLAF7	Q8IDC6	PF3D7_1357900	Pyrroline-5-carboxylate reductase OS=Plasmodium falciparum (isolate 3D7) OX=36329 GN=PF3D7_1357900 PE=1 SV=1	669.42	0	16	tr|Q8IDC6|Q8IDC6_PLAF7	3.67367e+07	3.76696e+07	3.73625e+07	4.11962e+07	3.35397e+07	3.25839e+07	3.73625e+07	3.35397e+07	0.0127611	0.131961	-0.155723	0.030303	0.0151515	0.618361
tr|C0H5B6|C0H5B6_PLAF7	C0H5B6	PF3D7_1315400	Zinc finger (CCCH type) protein, putative OS=Plasmodium falciparum (isolate 3D7) OX=36329 GN=PF3D7_1315400 PE=4 SV=1	109.98	0	3	tr|C0H5B6|C0H5B6_PLAF7	718339	533611	646798	569899	550076	668409	646798	569899	0.147165	0.106314	-0.182609	0	0	0.618999
tr|C0H535|C0H535_PLAF7	C0H535	PF3D7_0912500	SAP domain-containing protein OS=Plasmodium falciparum (isolate 3D7) OX=36329 GN=PF3D7_0912500 PE=4 SV=1	236.57	0	4	tr|C0H535|C0H535_PLAF7	9.96462e+06	1.38886e+07	1.24841e+07	8.98382e+06	1.40648e+07	1.08613e+07	1.24841e+07	1.08613e+07	0.164146	0.227293	-0.2009	0.0666667	0	0.619512
tr|Q8IB55|Q8IB55_PLAF7	Q8IB55	PF3D7_0822100	Mediator of RNA polymerase II transcription subunit 7 OS=Plasmodium falciparum (isolate 3D7) OX=36329 GN=PF3D7_0822100 PE=3 SV=1	41.12	0.0036075	2	tr|Q8IB55|Q8IB55_PLAF7	374623	461321	531916	480876	436607	522509	461321	480876	0.17279	0.089496	0.0598944	0	0	0.619649
tr|A0A143ZYL5|A0A143ZYL5_PLAF7	A0A143ZYL5	PF3D7_1036900	Uncharacterized protein OS=Plasmodium falciparum (isolate 3D7) OX=36329 GN=PF3D7_1036900 PE=4 SV=1	2319.03	0	63	tr|A0A143ZYL5|A0A143ZYL5_PLAF7	1.28323e+08	1.75119e+08	1.53268e+08	1.26474e+08	1.58891e+08	1.4401e+08	1.53268e+08	1.4401e+08	0.153805	0.113375	-0.0898874	0.0175439	0.0131579	0.619738
tr|Q8I5C6|Q8I5C6_PLAF7	Q8I5C6	PF3D7_1229300	Uncharacterized protein OS=Plasmodium falciparum (isolate 3D7) OX=36329 GN=PF3D7_1229300 PE=4 SV=1	37.99	0.00423131	2	tr|Q8I5C6|Q8I5C6_PLAF7	154514	95437	86012.1	181809	107149	93339.9	95437	107149	0.331548	0.373491	0.166994	0.166667	0	0.619765
tr|Q8IDL4|Q8IDL4_PLAF7	Q8IDL4	PF3D7_1348500	TBC domain protein, putative OS=Plasmodium falciparum (isolate 3D7) OX=36329 GN=PF3D7_1348500 PE=4 SV=1	138.42	0	3	tr|Q8IDL4|Q8IDL4_PLAF7	238427	353647	483803	187201	332330	431256	353647	332330	0.342318	0.387325	-0.0896945	0.166667	0.0833333	0.620594
tr|Q8I333|Q8I333_PLAF7	Q8I333	PF3D7_0911900	Falstatin OS=Plasmodium falciparum (isolate 3D7) OX=36329 GN=PF3D7_0911900 PE=4 SV=1	157.4	0	4	tr|Q8I333|Q8I333_PLAF7	1.50381e+07	1.9413e+07	1.93767e+07	2.00316e+07	1.78658e+07	1.84254e+07	1.93767e+07	1.84254e+07	0.140193	0.0598824	-0.0726271	0.0555556	0	0.620616
tr|Q8IIK3|Q8IIK3_PLAF7	Q8IIK3	PF3D7_1116300	Peptidyl-prolyl cis-trans isomerase OS=Plasmodium falciparum (isolate 3D7) OX=36329 GN=PF3D7_1116300 PE=3 SV=1	98.19	0	4	tr|Q8IIK3|Q8IIK3_PLAF7	554453	1.1066e+06	1.30809e+06	866185	1.17707e+06	1.13562e+06	1.1066e+06	1.13562e+06	0.394232	0.159304	0.0373552	0.133333	0.0666667	0.623271
tr|C6S3E1|C6S3E1_PLAF7	C6S3E1	PF3D7_1032800	Leucine-rich repeat protein OS=Plasmodium falciparum (isolate 3D7) OX=36329 GN=PF3D7_1032800 PE=4 SV=1	228.28	0	8	tr|C6S3E1|C6S3E1_PLAF7	3.30737e+06	3.86239e+06	4.67048e+06	3.16228e+06	3.8574e+06	4.05853e+06	3.86239e+06	3.8574e+06	0.173677	0.12735	-0.00186736	0.0740741	0.0740741	0.623586
tr|O96267|O96267_PLAF7	O96267	PF3D7_0218700	Pre-mRNA-processing protein 45, putative OS=Plasmodium falciparum (isolate 3D7) OX=36329 GN=PF3D7_0218700 PE=4 SV=3	65.19	0.000832639	2	tr|O96267|O96267_PLAF7	450950	1.09277e+06	665216	534532	1.0875e+06	863896	665216	863896	0.443781	0.335686	0.377033	0	0	0.624717
tr|Q8IKA6|Q8IKA6_PLAF7	Q8IKA6	PF3D7_1473200	DnaJ protein, putative OS=Plasmodium falciparum (isolate 3D7) OX=36329 GN=PF3D7_1473200 PE=4 SV=1	1180.59	0	27	tr|Q8IKA6|Q8IKA6_PLAF7	5.06248e+07	5.32258e+07	5.27807e+07	4.40318e+07	5.19049e+07	5.46915e+07	5.27807e+07	5.19049e+07	0.0266438	0.110107	-0.0241382	0.020202	0.030303	0.626908
tr|Q8ILK4|Q8ILK4_PLAF7	Q8ILK4	PF3D7_1425900	DUF383 domain-containing protein OS=Plasmodium falciparum (isolate 3D7) OX=36329 GN=PF3D7_1425900 PE=4 SV=2	182.73	0	5	tr|Q8ILK4|Q8ILK4_PLAF7	5.21936e+06	4.42369e+06	4.87889e+06	5.36769e+06	4.7286e+06	5.02292e+06	4.87889e+06	5.02292e+06	0.0824706	0.0634702	0.0419733	0	0	0.62701
tr|Q8IBN1|Q8IBN1_PLAF7	Q8IBN1	PF3D7_0722200	Rhoptry-associated leucine zipper-like protein 1 OS=Plasmodium falciparum (isolate 3D7) OX=36329 GN=PF3D7_0722200 PE=4 SV=1	293.26	0	7	tr|Q8IBN1|Q8IBN1_PLAF7	1.29721e+06	498446	340932	2.40673e+06	529856	406361	498446	529856	0.719919	1.00597	0.0881631	0	0	0.62726
tr|Q8IKN5|Q8IKN5_PLAF7	Q8IKN5	PF3D7_1459600	Uncharacterized protein OS=Plasmodium falciparum (isolate 3D7) OX=36329 GN=PF3D7_1459600 PE=4 SV=1	275.9	0	9	tr|Q8IKN5|Q8IKN5_PLAF7	5.59664e+06	5.23522e+06	4.35318e+06	4.54956e+06	5.38985e+06	4.455e+06	5.23522e+06	4.54956e+06	0.126369	0.107253	-0.202523	0.0555556	0.0555556	0.62754
tr|A0A143ZY29|A0A143ZY29_PLAF7	A0A143ZY29	PF3D7_1005500	Regulator of nonsense transcripts 1, putative OS=Plasmodium falciparum (isolate 3D7) OX=36329 GN=PF3D7_1005500 PE=4 SV=1	188.33	0	3	tr|A0A143ZY29|A0A143ZY29_PLAF7	1.40911e+06	939757	992304	1.00896e+06	1.05183e+06	1.0285e+06	992304	1.0285e+06	0.230899	0.020845	0.0516889	0.166667	0.25	0.629317
tr|K7NTP5|K7NTP5_PLAF7	K7NTP5	PF3D7_0831700	Heat shock protein 70 OS=Plasmodium falciparum (isolate 3D7) OX=36329 GN=PF3D7_0831700 PE=2 SV=1	2476.5	0	39	tr|K7NTP5|K7NTP5_PLAF7	2.69504e+08	1.75788e+08	1.76092e+08	2.39766e+08	2.06945e+08	2.07287e+08	1.76092e+08	2.07287e+08	0.260802	0.0864731	0.235305	0.026455	0.042328	0.630424
tr|Q8IEC8|Q8IEC8_PLAF7	Q8IEC8	PF3D7_1318800	Translocation protein SEC63 OS=Plasmodium falciparum (isolate 3D7) OX=36329 GN=PF3D7_1318800 PE=4 SV=1	848.01	0	20	tr|Q8IEC8|Q8IEC8_PLAF7	7.6922e+07	5.70008e+07	5.77341e+07	7.23779e+07	6.46372e+07	6.36535e+07	5.77341e+07	6.46372e+07	0.176812	0.0714377	0.162941	0.0119048	0.0238095	0.63131
tr|Q8IKC9|Q8IKC9_PLAF7	Q8IKC9	PF3D7_1470900	Proteasome subunit beta OS=Plasmodium falciparum (isolate 3D7) OX=36329 GN=PF3D7_1470900 PE=1 SV=2	333.3	0	10	tr|Q8IKC9|Q8IKC9_PLAF7	2.1151e+07	1.80152e+07	2.00859e+07	1.66988e+07	1.89861e+07	2.09999e+07	2.00859e+07	1.89861e+07	0.0807355	0.113892	-0.0812419	0.030303	0	0.631606
tr|Q8I298|Q8I298_PLAF7	Q8I298	PF3D7_0104200	StAR-related lipid transfer protein OS=Plasmodium falciparum (isolate 3D7) OX=36329 GN=PF3D7_0104200 PE=4 SV=1	297.45	0	7	tr|Q8I298|Q8I298_PLAF7	8.55614e+06	6.88783e+06	6.83289e+06	9.01602e+06	7.2498e+06	7.22909e+06	6.88783e+06	7.2498e+06	0.1319	0.130976	0.0738925	0	0	0.632275
tr|Q8IJS7|Q8IJS7_PLAF7	Q8IJS7	PF3D7_1011800	PRE-binding protein OS=Plasmodium falciparum (isolate 3D7) OX=36329 GN=PF3D7_1011800 PE=4 SV=1	3767.53	0	74	tr|Q8IJS7|Q8IJS7_PLAF7	3.62455e+08	2.5531e+08	2.59792e+08	2.90291e+08	2.61508e+08	2.6605e+08	2.59792e+08	2.6605e+08	0.207192	0.0567611	0.0343414	0.0155763	0.0218069	0.633033
tr|Q8IM06|Q8IM06_PLAF7	Q8IM06	PF3D7_1409000	WD repeat-containing protein, putative OS=Plasmodium falciparum (isolate 3D7) OX=36329 GN=PF3D7_1409000 PE=4 SV=1	40.29	0.00358423	1	tr|Q8IM06|Q8IM06_PLAF7	77850.4	11594.8	25263.4	24156.7	38532.1	50970.4	25263.4	38532.1	0.914867	0.354178	0.609013	0	0	0.633434
tr|Q8I374|Q8I374_PLAF7	Q8I374	PF3D7_0907700	Subunit of proteaseome activator complex,putative OS=Plasmodium falciparum (isolate 3D7) OX=36329 GN=PF3D7_0907700 PE=1 SV=1	1251.23	0	22	tr|Q8I374|Q8I374_PLAF7	4.25327e+07	4.57218e+07	4.68893e+07	4.01993e+07	4.48231e+07	4.52162e+07	4.57218e+07	4.48231e+07	0.0500607	0.0642656	-0.0286398	0.010101	0.030303	0.633819
tr|C6KSR5|C6KSR5_PLAF7	C6KSR5	PF3D7_0606700	Coatomer alpha subunit, putative OS=Plasmodium falciparum (isolate 3D7) OX=36329 GN=PF3D7_0606700 PE=4 SV=1	651.39	0	15	tr|C6KSR5|C6KSR5_PLAF7	8.66988e+06	7.87591e+06	7.9569e+06	7.30443e+06	8.12492e+06	8.18182e+06	7.9569e+06	8.12492e+06	0.0534921	0.0623809	0.0301478	0.0333333	0.0333333	0.634315
tr|Q8IL71|Q8IL71_PLAF7	Q8IL71	PF3D7_1439800	Vesicle-associated membrane protein, putative OS=Plasmodium falciparum (isolate 3D7) OX=36329 GN=PF3D7_1439800 PE=4 SV=1	397.82	0	11	tr|Q8IL71|Q8IL71_PLAF7	5.7044e+07	4.72265e+07	4.42391e+07	5.13252e+07	5.35218e+07	4.97011e+07	4.72265e+07	5.13252e+07	0.135328	0.037221	0.120072	0	0	0.63515
tr|Q8IDZ5|Q8IDZ5_PLAF7	Q8IDZ5	PF3D7_1333300	Transmembrane protein Tmp21 homologue, putative OS=Plasmodium falciparum (isolate 3D7) OX=36329 GN=PF3D7_1333300 PE=3 SV=1	202.51	0	5	tr|Q8IDZ5|Q8IDZ5_PLAF7	2.94142e+06	1.85673e+06	2.07596e+06	2.22411e+06	2.07439e+06	2.01871e+06	2.07596e+06	2.07439e+06	0.250299	0.0504474	-0.00109368	0.047619	0.0952381	0.635797
tr|Q8IB40|Q8IB40_PLAF7	Q8IB40	PF3D7_0820500	C-13 antigen OS=Plasmodium falciparum (isolate 3D7) OX=36329 GN=PF3D7_0820500 PE=4 SV=1	120.07	0	4	tr|Q8IB40|Q8IB40_PLAF7	500404	1.95911e+06	1.56462e+06	1.09064e+06	1.60196e+06	1.50833e+06	1.56462e+06	1.50833e+06	0.562512	0.194412	-0.0528587	0.0833333	0	0.635917
tr|Q8IJ72|Q8IJ72_PLAF7	Q8IJ72	PF3D7_1033700	Bromodomain protein 1 OS=Plasmodium falciparum (isolate 3D7) OX=36329 GN=PF3D7_1033700 PE=1 SV=1	455.78	0	15	tr|Q8IJ72|Q8IJ72_PLAF7	1.37873e+07	1.47976e+07	1.25043e+07	1.28948e+07	1.42099e+07	1.23058e+07	1.37873e+07	1.28948e+07	0.0839145	0.0742083	-0.096557	0.0208333	0	0.63663
tr|Q8IL97|Q8IL97_PLAF7	Q8IL97	PF3D7_1436900	Histidine triad protein, putative OS=Plasmodium falciparum (isolate 3D7) OX=36329 GN=PF3D7_1436900 PE=1 SV=1	56.38	0.000798722	2	tr|Q8IL97|Q8IL97_PLAF7	200825	520535	266118	499520	528469	182198	266118	499520	0.513187	0.47623	0.908473	0.166667	0	0.637608
tr|Q8I2V9|Q8I2V9_PLAF7	Q8I2V9	PF3D7_0919400	Protein disulfide isomerase OS=Plasmodium falciparum (isolate 3D7) OX=36329 GN=PF3D7_0919400 PE=4 SV=1	113.37	0	3	tr|Q8I2V9|Q8I2V9_PLAF7	1.53463e+06	1.89922e+06	1.99798e+06	1.83399e+06	1.80369e+06	2.03218e+06	1.89922e+06	1.83399e+06	0.134792	0.065662	-0.0504222	0.0833333	0.166667	0.637615
tr|Q8IEE9|Q8IEE9_PLAF7	Q8IEE9	PF3D7_1316600	Choline-phosphate cytidylyltransferase OS=Plasmodium falciparum (isolate 3D7) OX=36329 GN=PF3D7_1316600 PE=1 SV=1	118.93	0	3	tr|Q8IEE9|Q8IEE9_PLAF7	2.01598e+06	1.62349e+06	1.69726e+06	2.24623e+06	1.46774e+06	1.34101e+06	1.69726e+06	1.46774e+06	0.117259	0.290895	-0.209614	0	0	0.638094
tr|C6KSN1|C6KSN1_PLAF7	C6KSN1	PF3D7_0603100	RRM domain-containing protein OS=Plasmodium falciparum (isolate 3D7) OX=36329 GN=PF3D7_0603100 PE=4 SV=1	37.59	0.00421941	2	tr|C6KSN1|C6KSN1_PLAF7	935943	870995	983045	839000	964675	1.15268e+06	935943	964675	0.0604966	0.160197	0.0436227	0	0	0.638113
tr|Q8I573|Q8I573_PLAF7	Q8I573	PF3D7_1234900	CHCH domain-containing protein OS=Plasmodium falciparum (isolate 3D7) OX=36329 GN=PF3D7_1234900 PE=4 SV=1	319.6	0	4	tr|Q8I573|Q8I573_PLAF7	2.94858e+06	6.1302e+06	5.6579e+06	4.42804e+06	5.91262e+06	5.3374e+06	5.6579e+06	5.3374e+06	0.349513	0.143232	-0.0841293	0	0	0.638141
tr|Q8IKS3|Q8IKS3_PLAF7	Q8IKS3	PF3D7_1455500	AP-1 complex subunit gamma, putative OS=Plasmodium falciparum (isolate 3D7) OX=36329 GN=PF3D7_1455500 PE=4 SV=1	213.67	0	9	tr|Q8IKS3|Q8IKS3_PLAF7	3.24461e+06	4.29708e+06	4.21433e+06	3.21196e+06	4.41649e+06	3.4412e+06	4.21433e+06	3.4412e+06	0.149342	0.173343	-0.292393	0.037037	0	0.638996
tr|Q8IDG9|Q8IDG9_PLAF7	Q8IDG9	PF3D7_1353100	Uncharacterized protein OS=Plasmodium falciparum (isolate 3D7) OX=36329 GN=PF3D7_1353100 PE=4 SV=1	374.55	0	9	tr|Q8IDG9|Q8IDG9_PLAF7	9.04194e+07	6.61511e+07	7.34008e+07	9.33007e+07	7.24698e+07	7.71015e+07	7.34008e+07	7.71015e+07	0.16251	0.135104	0.0709638	0.0512821	0.0769231	0.639154
tr|Q8IDX1|Q8IDX1_PLAF7	Q8IDX1	PF3D7_1336000	Uncharacterized protein OS=Plasmodium falciparum (isolate 3D7) OX=36329 GN=PF3D7_1336000 PE=4 SV=1	31.49	0.00938338	1	tr|Q8IDX1|Q8IDX1_PLAF7	63147.5	52739.8	74140.3	66859.2	65438.7	65679.1	63147.5	65679.1	0.168948	0.0115209	0.0567081	0	0	0.639196
tr|Q8IAS1|Q8IAS1_PLAF7	Q8IAS1	PF3D7_0808300	Ubiquitin regulatory protein, putative OS=Plasmodium falciparum (isolate 3D7) OX=36329 GN=PF3D7_0808300 PE=4 SV=1	109.47	0	4	tr|Q8IAS1|Q8IAS1_PLAF7	630003	2.88142e+06	2.66726e+06	1.60027e+06	2.39495e+06	2.34786e+06	2.66726e+06	2.34786e+06	0.60336	0.210863	-0.184013	0	0	0.640263
tr|Q8I3F1|Q8I3F1_PLAF7	Q8I3F1	PF3D7_0532300	PRESAN domain-containing protein OS=Plasmodium falciparum (isolate 3D7) OX=36329 GN=PF3D7_0532300 PE=4 SV=1	1073.63	0	25	tr|Q8I3F1|Q8I3F1_PLAF7	2.00551e+08	1.53789e+08	1.34398e+08	1.84273e+08	1.71769e+08	1.56539e+08	1.53789e+08	1.71769e+08	0.208746	0.0812899	0.159521	0.00980392	0.0196078	0.640802
tr|Q8ILV2|Q8ILV2_PLAF7	Q8ILV2	PF3D7_1414300	60S ribosomal protein L10, putative OS=Plasmodium falciparum (isolate 3D7) OX=36329 GN=PF3D7_1414300 PE=1 SV=1	842.62	0	19	tr|Q8ILV2|Q8ILV2_PLAF7	9.33708e+07	6.19653e+07	6.53492e+07	7.22232e+07	6.41558e+07	6.78386e+07	6.53492e+07	6.78386e+07	0.234339	0.0593302	0.0539388	0.0606061	0.0606061	0.641436
tr|C0H5G3|C0H5G3_PLAF7	C0H5G3	PF3D7_1341300	60S ribosomal protein L18-2, putative OS=Plasmodium falciparum (isolate 3D7) OX=36329 GN=PF3D7_1341300 PE=1 SV=1	675.49	0	11	tr|C0H5G3|C0H5G3_PLAF7	1.06187e+08	6.68082e+07	6.37617e+07	7.82804e+07	6.2482e+07	7.34649e+07	6.68082e+07	7.34649e+07	0.299848	0.113394	0.137029	0.0666667	0.0833333	0.641452
tr|Q8IJQ9|Q8IJQ9_PLAF7	Q8IJQ9	PF3D7_1013600	Uncharacterized protein OS=Plasmodium falciparum (isolate 3D7) OX=36329 GN=PF3D7_1013600 PE=4 SV=1	86.86	0	3	tr|Q8IJQ9|Q8IJQ9_PLAF7	708793	1.16959e+06	1.22918e+06	1.15581e+06	1.06814e+06	1.04052e+06	1.16959e+06	1.06814e+06	0.274947	0.0553208	-0.130902	0	0	0.64333
tr|Q8I2J3|Q8I2J3_PLAF7	Q8I2J3	PF3D7_0932300	M18 aspartyl aminopeptidase OS=Plasmodium falciparum (isolate 3D7) OX=36329 GN=PF3D7_0932300 PE=1 SV=1	646.37	0	16	tr|Q8I2J3|Q8I2J3_PLAF7	2.15803e+07	2.24417e+07	2.62287e+07	1.90495e+07	2.18069e+07	2.60769e+07	2.24417e+07	2.18069e+07	0.105602	0.158698	-0.0413988	0	0	0.643517
tr|Q8IJF6|Q8IJF6_PLAF7	Q8IJF6	PF3D7_1024800	Uncharacterized protein OS=Plasmodium falciparum (isolate 3D7) OX=36329 GN=PF3D7_1024800 PE=4 SV=2	246.74	0	7	tr|Q8IJF6|Q8IJF6_PLAF7	4.06783e+06	2.62579e+06	2.52752e+06	3.38455e+06	3.02868e+06	3.23971e+06	2.62579e+06	3.23971e+06	0.28055	0.0556181	0.303112	0.047619	0	0.643811
tr|Q8IDB7|Q8IDB7_PLAF7	Q8IDB7	PF3D7_1359400	CUGBP Elav-like family member 1 OS=Plasmodium falciparum (isolate 3D7) OX=36329 GN=PF3D7_1359400 PE=4 SV=1	485.06	0	11	tr|Q8IDB7|Q8IDB7_PLAF7	5.6906e+07	5.75956e+07	5.63751e+07	4.91497e+07	6.04724e+07	5.53283e+07	5.6906e+07	5.53283e+07	0.0107441	0.103108	-0.0405619	0	0	0.646889
tr|Q8IBT7|Q8IBT7_PLAF7	Q8IBT7	PF3D7_0716300	Uncharacterized protein OS=Plasmodium falciparum (isolate 3D7) OX=36329 GN=PF3D7_0716300 PE=4 SV=1	369.25	0	13	tr|Q8IBT7|Q8IBT7_PLAF7	1.37206e+07	1.9386e+07	1.8215e+07	1.85209e+07	1.79937e+07	1.70221e+07	1.8215e+07	1.79937e+07	0.174823	0.0426024	-0.0176304	0	0	0.647532
tr|Q8IL56|Q8IL56_PLAF7	Q8IL56	PF3D7_1441400	FACT complex subunit SSRP1 OS=Plasmodium falciparum (isolate 3D7) OX=36329 GN=PF3D7_1441400 PE=3 SV=1	683.28	0	19	tr|Q8IL56|Q8IL56_PLAF7	3.25811e+07	2.44205e+07	2.55017e+07	2.70346e+07	2.65105e+07	2.45167e+07	2.55017e+07	2.65105e+07	0.161175	0.0510577	0.0559735	0	0	0.648272
tr|Q8IB57|Q8IB57_PLAF7	Q8IB57	PF3D7_0822300	Small nuclear ribonucleoprotein G OS=Plasmodium falciparum (isolate 3D7) OX=36329 GN=PF3D7_0822300 PE=3 SV=1	40.51	0.00359195	2	tr|Q8IB57|Q8IB57_PLAF7	1.76268e+06	871583	1.07369e+06	1.0136e+06	958272	1.28241e+06	1.07369e+06	1.0136e+06	0.377991	0.159844	-0.0830905	0	0	0.64831
tr|Q8IM16|Q8IM16_PLAF7	Q8IM16	PF3D7_1407800	Plasmepsin IV OS=Plasmodium falciparum (isolate 3D7) OX=36329 GN=PF3D7_1407800 PE=1 SV=1	922.36	0	17	tr|Q8IM16|Q8IM16_PLAF7	1.50229e+08	8.88597e+07	9.4133e+07	9.79968e+07	9.27547e+07	1.10602e+08	9.4133e+07	9.79968e+07	0.306208	0.091321	0.0580337	0.0133333	0.0266667	0.648702
tr|Q8IJ66|Q8IJ66_PLAF7	Q8IJ66	PF3D7_1034400	Succinate dehydrogenase [ubiquinone] flavoprotein subunit, mitochondrial OS=Plasmodium falciparum (isolate 3D7) OX=36329 GN=PF3D7_1034400 PE=3 SV=1	193.29	0	5	tr|Q8IJ66|Q8IJ66_PLAF7	774165	515025	542340	659687	571738	690901	542340	659687	0.233225	0.0964322	0.282584	0.0666667	0	0.650667
tr|Q8IE76|Q8IE76_PLAF7	Q8IE76	PF3D7_1324100	Uncharacterized protein OS=Plasmodium falciparum (isolate 3D7) OX=36329 GN=PF3D7_1324100 PE=4 SV=1	31.99	0.00942127	2	tr|Q8IE76|Q8IE76_PLAF7	63678.5	35757.9	7606.08	33226.7	16279.9	14437.3	35757.9	16279.9	0.785753	0.485922	-1.13517	0.166667	0.166667	0.652207
tr|Q8ILS0|Q8ILS0_PLAF7	Q8ILS0	PF3D7_1417500	H/ACA ribonucleoprotein complex subunit 4,putative OS=Plasmodium falciparum (isolate 3D7) OX=36329 GN=PF3D7_1417500 PE=4 SV=1	498.03	0	10	tr|Q8ILS0|Q8ILS0_PLAF7	1.82896e+07	1.42155e+07	1.45128e+07	1.63617e+07	1.64574e+07	1.59669e+07	1.45128e+07	1.63617e+07	0.144918	0.0159899	0.172998	0.0277778	0.0833333	0.652643
tr|Q8I531|Q8I531_PLAF7	Q8I531	PF3D7_1239200	Transcription factor with AP2 domain(S) OS=Plasmodium falciparum (isolate 3D7) OX=36329 GN=PF3D7_1239200 PE=4 SV=1	535.12	0	21	tr|Q8I531|Q8I531_PLAF7	4.91882e+06	7.72096e+06	6.29754e+06	4.94348e+06	7.0334e+06	5.56378e+06	6.29754e+06	5.56378e+06	0.221963	0.183574	-0.178724	0	0	0.652926
tr|Q8I0E0|Q8I0E0_PLAF7	Q8I0E0	PF3D7_1200500	Rifin OS=Plasmodium falciparum (isolate 3D7) OX=36329 GN=PF3D7_1200500 PE=4 SV=1	145.61	0	6	tr|Q8I0E0|Q8I0E0_PLAF7	6.52844e+06	4.61763e+06	3.99782e+06	6.5599e+06	5.13711e+06	4.48685e+06	4.61763e+06	5.13711e+06	0.261304	0.196537	0.153802	0.047619	0	0.656747
tr|Q8IKJ0|Q8IKJ0_PLAF7	Q8IKJ0	PF3D7_1464700	V-type proton ATPase subunit OS=Plasmodium falciparum (isolate 3D7) OX=36329 GN=PF3D7_1464700 PE=3 SV=1	387.52	0	11	tr|Q8IKJ0|Q8IKJ0_PLAF7	7.18584e+06	6.66193e+06	6.96039e+06	8.29014e+06	7.8754e+06	5.92499e+06	6.96039e+06	7.8754e+06	0.0378893	0.171513	0.178186	0	0	0.66042
tr|Q8IM71|Q8IM71_PLAF7	Q8IM71	PF3D7_1401800	Choline kinase OS=Plasmodium falciparum (isolate 3D7) OX=36329 GN=PF3D7_1401800 PE=1 SV=1	72.05	0.000857633	3	tr|Q8IM71|Q8IM71_PLAF7	812106	1.04259e+06	936864	736824	934116	985601	936864	934116	0.123987	0.148295	-0.00423682	0	0	0.661154
tr|Q8ILB0|Q8ILB0_PLAF7	Q8ILB0	PF3D7_1435400	ER membrane protein complex subunit 4, putative OS=Plasmodium falciparum (isolate 3D7) OX=36329 GN=PF3D7_1435400 PE=4 SV=1	69.7	0.000845309	3	tr|Q8ILB0|Q8ILB0_PLAF7	2.6049e+06	1.69141e+06	1.57866e+06	1.71779e+06	1.82581e+06	1.82166e+06	1.69141e+06	1.82166e+06	0.28738	0.0342227	0.107033	0	0	0.663294
tr|Q8IHN4|Q8IHN4_PLAF7	Q8IHN4	PF3D7_1149000	Antigen 332, DBL-like protein OS=Plasmodium falciparum (isolate 3D7) OX=36329 GN=PF3D7_1149000 PE=4 SV=2	3047.39	0	78	tr|Q8IHN4|Q8IHN4_PLAF7	1.09347e+08	9.09855e+07	8.16103e+07	1.21542e+08	9.454e+07	8.42723e+07	9.09855e+07	9.454e+07	0.150125	0.192283	0.0552874	0.0238095	0.0136054	0.664538
tr|Q8ILL3|Q8ILL3_PLAF7	Q8ILL3	PF3D7_1424100	60S ribosomal protein L5, putative OS=Plasmodium falciparum (isolate 3D7) OX=36329 GN=PF3D7_1424100 PE=1 SV=1	1160.33	0	24	tr|Q8ILL3|Q8ILL3_PLAF7	4.19935e+08	3.11367e+08	3.21275e+08	3.5695e+08	3.18365e+08	3.20697e+08	3.21275e+08	3.20697e+08	0.171083	0.0651658	-0.00260043	0.0196078	0.0196078	0.666435
tr|C6KSV8|C6KSV8_PLAF7	C6KSV8	PF3D7_0611300	Uncharacterized protein OS=Plasmodium falciparum (isolate 3D7) OX=36329 GN=PF3D7_0611300 PE=4 SV=1	39	0.00355872	2	tr|C6KSV8|C6KSV8_PLAF7	699969	491877	437834	604328	548846	351997	491877	548846	0.254786	0.264291	0.158104	0	0	0.666816
tr|Q8IE50|Q8IE50_PLAF7	Q8IE50	PF3D7_1329100	Myosin C OS=Plasmodium falciparum (isolate 3D7) OX=36329 GN=PF3D7_1329100 PE=3 SV=1	202.8	0	5	tr|Q8IE50|Q8IE50_PLAF7	1.56169e+06	1.93297e+06	2.06901e+06	1.82467e+06	1.81735e+06	2.17098e+06	1.93297e+06	1.82467e+06	0.141596	0.104294	-0.0831869	0	0	0.668676
tr|Q8IDV9|Q8IDV9_PLAF7	Q8IDV9	PF3D7_1337300	Exoribonuclease, putative OS=Plasmodium falciparum (isolate 3D7) OX=36329 GN=PF3D7_1337300 PE=4 SV=1	36.25	0.00557491	2	tr|Q8IDV9|Q8IDV9_PLAF7	113514	12767.3	11947.5	12341.1	17401	33663.2	12767.3	17401	1.26756	0.527119	0.446724	0	0	0.669517
tr|C0H5H0|C0H5H0_PLAF7	C0H5H0	PF3D7_1344200	Heat shock protein 110, putative OS=Plasmodium falciparum (isolate 3D7) OX=36329 GN=PF3D7_1344200 PE=3 SV=1	1839.43	0	42	tr|C0H5H0|C0H5H0_PLAF7	6.31372e+07	4.88885e+07	5.36236e+07	4.78111e+07	5.48091e+07	5.54906e+07	5.36236e+07	5.48091e+07	0.131423	0.0806527	0.0315456	0.0119048	0	0.669714
tr|Q8IKL5|Q8IKL5_PLAF7	Q8IKL5	PF3D7_1461900	Valine--tRNA ligase, putative OS=Plasmodium falciparum (isolate 3D7) OX=36329 GN=PF3D7_1461900 PE=3 SV=1	1215.41	0	28	tr|Q8IKL5|Q8IKL5_PLAF7	2.88979e+07	2.74324e+07	3.0758e+07	2.64123e+07	2.58345e+07	3.17943e+07	2.88979e+07	2.64123e+07	0.0574131	0.117328	-0.129752	0.0215054	0.0537634	0.672157
tr|Q8IM66|Q8IM66_PLAF7	Q8IM66	PF3D7_1402300	26S proteasome regulatory subunit RPN6 OS=Plasmodium falciparum (isolate 3D7) OX=36329 GN=PF3D7_1402300 PE=4 SV=1	308.91	0	11	tr|Q8IM66|Q8IM66_PLAF7	1.43202e+07	1.54776e+07	1.55605e+07	1.41671e+07	1.42833e+07	1.54952e+07	1.54776e+07	1.42833e+07	0.0458619	0.0502135	-0.115853	0	0	0.672462
tr|O97266|O97266_PLAF7	O97266	PF3D7_0315100	Eukaryotic translation initiation factor 4E OS=Plasmodium falciparum (isolate 3D7) OX=36329 GN=PF3D7_0315100 PE=3 SV=1	399.93	0	10	tr|O97266|O97266_PLAF7	2.6276e+07	1.73482e+07	1.99606e+07	1.86172e+07	1.87442e+07	2.20467e+07	1.99606e+07	1.87442e+07	0.216564	0.0981875	-0.0907151	0	0.0512821	0.67289
tr|Q8IDC8|Q8IDC8_PLAF7	Q8IDC8	PF3D7_1357700	U3 small nucleolar RNA-associated protein 21,putative OS=Plasmodium falciparum (isolate 3D7) OX=36329 GN=PF3D7_1357700 PE=4 SV=1	85.25	0	5	tr|Q8IDC8|Q8IDC8_PLAF7	662966	582469	587695	480561	795993	718716	587695	718716	0.073714	0.247202	0.290353	0	0	0.673562
tr|Q8I1T2|Q8I1T2_PLAF7	Q8I1T2	PF3D7_0415500	Nuclear cap-binding protein subunit 2 OS=Plasmodium falciparum (isolate 3D7) OX=36329 GN=PF3D7_0415500 PE=3 SV=1	110.72	0	4	tr|Q8I1T2|Q8I1T2_PLAF7	2.69947e+06	3.61752e+06	3.32868e+06	2.93399e+06	3.91033e+06	3.30832e+06	3.32868e+06	3.30832e+06	0.146	0.145549	-0.0088523	0	0	0.673893
tr|Q8IHP1|Q8IHP1_PLAF7	Q8IHP1	PF3D7_1148000	Serine/threonine protein kinase, putative OS=Plasmodium falciparum (isolate 3D7) OX=36329 GN=PF3D7_1148000 PE=4 SV=1	50.42	0.000772798	3	tr|Q8IHP1|Q8IHP1_PLAF7	643425	189670	230904	365209	192676	252486	230904	252486	0.707484	0.324328	0.128913	0.111111	0	0.674121
tr|Q8IIV8|Q8IIV8_PLAF7	Q8IIV8	PF3D7_1104400	Thioredoxin domain-containing protein OS=Plasmodium falciparum (isolate 3D7) OX=36329 GN=PF3D7_1104400 PE=4 SV=1	1455	0	29	tr|Q8IIV8|Q8IIV8_PLAF7	1.3038e+08	9.07215e+07	9.09062e+07	9.81139e+07	9.96376e+07	9.41621e+07	9.09062e+07	9.81139e+07	0.219643	0.029043	0.11008	0.0217391	0.0507246	0.675277
tr|Q8IEK8|Q8IEK8_PLAF7	Q8IEK8	PF3D7_1310800	TPR_REGION domain-containing protein OS=Plasmodium falciparum (isolate 3D7) OX=36329 GN=PF3D7_1310800 PE=4 SV=1	34.69	0.00688705	3	tr|Q8IEK8|Q8IEK8_PLAF7	1.27878e+07	9.19945e+06	8.62742e+06	1.03154e+07	1.02436e+07	1.12571e+07	9.19945e+06	1.03154e+07	0.220982	0.0533277	0.165182	0.111111	0	0.67566
tr|Q8IEE2|Q8IEE2_PLAF7	Q8IEE2	PF3D7_1317400	RanBP2-type domain-containing protein OS=Plasmodium falciparum (isolate 3D7) OX=36329 GN=PF3D7_1317400 PE=4 SV=1	73.53	0.000863558	3	tr|Q8IEE2|Q8IEE2_PLAF7	7.72539e+06	1.21872e+07	1.1917e+07	7.93836e+06	1.13215e+07	1.01035e+07	1.1917e+07	1.01035e+07	0.235789	0.175068	-0.238173	0	0	0.67598
tr|Q8IJW0|Q8IJW0_PLAF7	Q8IJW0	PF3D7_1008400	26S protease regulatory subunit 4, putative OS=Plasmodium falciparum (isolate 3D7) OX=36329 GN=PF3D7_1008400 PE=3 SV=2	1135.98	0	27	tr|Q8IJW0|Q8IJW0_PLAF7	4.25712e+07	4.40892e+07	4.39106e+07	4.03889e+07	4.23202e+07	4.41049e+07	4.39106e+07	4.23202e+07	0.0190627	0.0439655	-0.0532221	0	0	0.676644
tr|C0H5G2|C0H5G2_PLAF7	C0H5G2	PF3D7_1340700	Ras-related protein Rab-11B OS=Plasmodium falciparum (isolate 3D7) OX=36329 GN=PF3D7_1340700 PE=4 SV=2	212.99	0	7	tr|C0H5G2|C0H5G2_PLAF7	1.65968e+06	1.60185e+06	1.556e+06	1.86896e+06	1.54572e+06	1.59328e+06	1.60185e+06	1.59328e+06	0.0323551	0.104546	-0.00774103	0.047619	0	0.676885
tr|Q8IJW2|Q8IJW2_PLAF7	Q8IJW2	PF3D7_1008100	Uncharacterized protein OS=Plasmodium falciparum (isolate 3D7) OX=36329 GN=PF3D7_1008100 PE=4 SV=1	84.79	0	5	tr|Q8IJW2|Q8IJW2_PLAF7	677842	573244	459708	604487	582962	418279	573244	582962	0.191311	0.190312	0.0242511	0.0666667	0	0.677223
tr|O96128|O96128_PLAF7	O96128	PF3D7_0202500	Early transcribed membrane protein 2 OS=Plasmodium falciparum (isolate 3D7) OX=36329 GN=PF3D7_0202500 PE=4 SV=1	102.14	0	2	tr|O96128|O96128_PLAF7	3.84635e+06	798695	653857	3.56469e+06	1.15257e+06	1.01994e+06	798695	1.15257e+06	1.02068	0.74904	0.529133	0	0	0.677711
tr|Q8IDQ6|Q8IDQ6_PLAF7	Q8IDQ6	PF3D7_1343300	CDT1 domain-containing protein OS=Plasmodium falciparum (isolate 3D7) OX=36329 GN=PF3D7_1343300 PE=4 SV=1	242.07	0	7	tr|Q8IDQ6|Q8IDQ6_PLAF7	1.45009e+06	1.03912e+06	1.19786e+06	1.0745e+06	1.28429e+06	1.13286e+06	1.19786e+06	1.13286e+06	0.168629	0.0930332	-0.0804862	0	0.047619	0.678103
tr|C0H5B7|C0H5B7_PLAF7	C0H5B7	PF3D7_1315600	CDP-diacylglycerol--inositol 3-phosphatidyltransferase OS=Plasmodium falciparum (isolate 3D7) OX=36329 GN=PF3D7_1315600 PE=3 SV=1	80.5	0	2	tr|C0H5B7|C0H5B7_PLAF7	2.80402e+06	1.58627e+06	1.33876e+06	2.05183e+06	1.55509e+06	1.41885e+06	1.58627e+06	1.55509e+06	0.410717	0.198873	-0.0286433	0	0	0.682108
tr|Q8II24|Q8II24_PLAF7	Q8II24	PF3D7_1134000	Heat shock protein 70 OS=Plasmodium falciparum (isolate 3D7) OX=36329 GN=PF3D7_1134000 PE=3 SV=1	3631.73	0	58	tr|Q8II24|Q8II24_PLAF7	7.91354e+08	5.84293e+08	5.86168e+08	7.22989e+08	6.7411e+08	6.38775e+08	5.86168e+08	6.7411e+08	0.181988	0.0623148	0.201669	0.0111111	0	0.683004
tr|O77313|O77313_PLAF7	O77313	PF3D7_0303000	N-ethylmaleimide-sensitive fusion protein OS=Plasmodium falciparum (isolate 3D7) OX=36329 GN=PF3D7_0303000 PE=4 SV=1	517.5	0	10	tr|O77313|O77313_PLAF7	7.77019e+06	6.17203e+06	7.06292e+06	7.09443e+06	7.2286e+06	7.3615e+06	7.06292e+06	7.2286e+06	0.114377	0.0184743	0.0334514	0.025641	0	0.683091
tr|C0H4V8|C0H4V8_PLAF7	C0H4V8	PF3D7_0818700	DNA helicase, putative OS=Plasmodium falciparum (isolate 3D7) OX=36329 GN=PF3D7_0818700 PE=4 SV=2	344.7	0	11	tr|C0H4V8|C0H4V8_PLAF7	4.94557e+06	4.19318e+06	3.89038e+06	3.89149e+06	4.00748e+06	4.57813e+06	4.19318e+06	4.00748e+06	0.125102	0.0883746	-0.0653505	0.0833333	0.0277778	0.683426
tr|Q8I420|Q8I420_PLAF7	Q8I420	PF3D7_0508300	Triose phosphate transporter OS=Plasmodium falciparum (isolate 3D7) OX=36329 GN=PF3D7_0508300 PE=4 SV=1	77.82	0	2	tr|Q8I420|Q8I420_PLAF7	1.18537e+07	8.07131e+06	9.03056e+06	9.58784e+06	9.69599e+06	1.0795e+07	9.03056e+06	9.69599e+06	0.203719	0.0666146	0.102574	0	0	0.68372
tr|Q8I3L8|Q8I3L8_PLAF7	Q8I3L8	PF3D7_0524700	Mitochondrial import receptor subunit TOM22,putative OS=Plasmodium falciparum (isolate 3D7) OX=36329 GN=PF3D7_0524700 PE=4 SV=1	46.66	0.00149701	2	tr|Q8I3L8|Q8I3L8_PLAF7	1.74062e+06	690456	863223	1.08595e+06	1.04383e+06	1.24248e+06	863223	1.08595e+06	0.5128	0.0931165	0.331158	0	0	0.684448
tr|Q8I5T2|Q8I5T2_PLAF7	Q8I5T2	PF3D7_1212000	Glutathione peroxidase OS=Plasmodium falciparum (isolate 3D7) OX=36329 GN=PF3D7_1212000 PE=3 SV=1	389.67	0	12	tr|Q8I5T2|Q8I5T2_PLAF7	2.21021e+07	1.98582e+07	2.06917e+07	1.99811e+07	2.02731e+07	2.05229e+07	2.06917e+07	2.02731e+07	0.0543115	0.0133855	-0.0294883	0	0	0.684657
tr|Q8IIU5|Q8IIU5_PLAF7	Q8IIU5	PF3D7_1105800	Uncharacterized protein OS=Plasmodium falciparum (isolate 3D7) OX=36329 GN=PF3D7_1105800 PE=4 SV=2	503.79	0	17	tr|Q8IIU5|Q8IIU5_PLAF7	5.23474e+07	3.81699e+07	4.00723e+07	4.37097e+07	4.57607e+07	4.56628e+07	4.00723e+07	4.56628e+07	0.17678	0.0256844	0.188415	0	0	0.684685
tr|Q8II73|Q8II73_PLAF7	Q8II73	PF3D7_1129000	Spermidine synthase OS=Plasmodium falciparum (isolate 3D7) OX=36329 GN=PF3D7_1129000 PE=1 SV=1	560.59	0	18	tr|Q8II73|Q8II73_PLAF7	8.6365e+07	5.58942e+07	5.55515e+07	7.30125e+07	6.3495e+07	6.90254e+07	5.58942e+07	6.90254e+07	0.268318	0.0697635	0.304428	0	0	0.68581
tr|Q8IJI0|Q8IJI0_PLAF7	Q8IJI0	PF3D7_1022400	Serine/arginine-rich splicing factor 4 OS=Plasmodium falciparum (isolate 3D7) OX=36329 GN=PF3D7_1022400 PE=4 SV=1	469.81	0	10	tr|Q8IJI0|Q8IJI0_PLAF7	2.71948e+07	2.11793e+07	1.95317e+07	2.34284e+07	2.11121e+07	1.9756e+07	2.11793e+07	2.11121e+07	0.178204	0.0866443	-0.00457975	0.030303	0.0606061	0.686253
tr|O77389|O77389_PLAF7	O77389	PF3D7_0316600	Formate-nitrite transporter OS=Plasmodium falciparum (isolate 3D7) OX=36329 GN=PF3D7_0316600 PE=4 SV=2	216.29	0	7	tr|O77389|O77389_PLAF7	1.30301e+07	1.10986e+07	1.04237e+07	1.1915e+07	1.2107e+07	1.16313e+07	1.10986e+07	1.1915e+07	0.117452	0.0201386	0.102413	0.125	0.0833333	0.686344
tr|Q8I540|Q8I540_PLAF7	Q8I540	PF3D7_1238300	Pre-mRNA-splicing factor CWC22, putative OS=Plasmodium falciparum (isolate 3D7) OX=36329 GN=PF3D7_1238300 PE=4 SV=1	95.73	0	3	tr|Q8I540|Q8I540_PLAF7	405012	253673	210986	225032	268116	285904	253673	268116	0.351711	0.120529	0.0798897	0	0	0.686436
tr|Q8I2M1|Q8I2M1_PLAF7	Q8I2M1	PF3D7_0928900	Guanylate kinase OS=Plasmodium falciparum (isolate 3D7) OX=36329 GN=PF3D7_0928900 PE=1 SV=1	50.02	0.000770416	2	tr|Q8I2M1|Q8I2M1_PLAF7	2.27772e+06	1.74472e+06	1.98296e+06	1.76124e+06	1.74529e+06	2.22797e+06	1.98296e+06	1.76124e+06	0.133379	0.143439	-0.171058	0	0	0.686732
tr|Q8IKU9|Q8IKU9_PLAF7	Q8IKU9	PF3D7_1452700	U1 snRNA associated protein, putative OS=Plasmodium falciparum (isolate 3D7) OX=36329 GN=PF3D7_1452700 PE=4 SV=2	48.39	0.00075643	2	tr|Q8IKU9|Q8IKU9_PLAF7	637079	588440	534928	545190	659853	623949	588440	623949	0.0870716	0.0962028	0.0845338	0	0.166667	0.68703
tr|Q8ILU8|Q8ILU8_PLAF7	Q8ILU8	PF3D7_1414800	Small nuclear ribonucleoprotein-associated protein B, putative OS=Plasmodium falciparum (isolate 3D7) OX=36329 GN=PF3D7_1414800 PE=4 SV=1	246.9	0	7	tr|Q8ILU8|Q8ILU8_PLAF7	8.81885e+06	1.54516e+07	1.39973e+07	8.80314e+06	1.48846e+07	1.13443e+07	1.39973e+07	1.13443e+07	0.273307	0.261565	-0.303186	0	0	0.688187
tr|Q8IIY8|Q8IIY8_PLAF7	Q8IIY8	PF3D7_1100800	Pfmc-2TM Maurer's cleft two transmembrane protein OS=Plasmodium falciparum (isolate 3D7) OX=36329 GN=PF3D7_1100800 PE=4 SV=2	57.77	0.000806452	1	tr|Q8IIY8|Q8IIY8_PLAF7	2.91463e+06	1.21086e+06	799435	1.95864e+06	1.57822e+06	1.37861e+06	1.21086e+06	1.57822e+06	0.683139	0.179845	0.382266	0	0	0.688559
tr|Q8I5L4|Q8I5L4_PLAF7	Q8I5L4	PF3D7_1219600	Phospholipid-transporting ATPase OS=Plasmodium falciparum (isolate 3D7) OX=36329 GN=PF3D7_1219600 PE=3 SV=1	244.43	0	7	tr|Q8I5L4|Q8I5L4_PLAF7	1.95762e+06	1.61236e+06	1.46411e+06	1.856e+06	1.59174e+06	1.77752e+06	1.61236e+06	1.77752e+06	0.150904	0.0779165	0.140698	0	0	0.688957
tr|Q8ID84|Q8ID84_PLAF7	Q8ID84	PF3D7_1362300	Calcium load-activated calcium channel OS=Plasmodium falciparum (isolate 3D7) OX=36329 GN=PF3D7_1362300 PE=3 SV=1	91.72	0	3	tr|Q8ID84|Q8ID84_PLAF7	3.81655e+06	2.20267e+06	2.24423e+06	2.94688e+06	2.64513e+06	2.97013e+06	2.24423e+06	2.94688e+06	0.334005	0.0635245	0.392971	0	0	0.68912
tr|Q8I4Y0|Q8I4Y0_PLAF7	Q8I4Y0	PF3D7_1245100	Kinesin-13, putative OS=Plasmodium falciparum (isolate 3D7) OX=36329 GN=PF3D7_1245100 PE=1 SV=2	253.71	0	6	tr|Q8I4Y0|Q8I4Y0_PLAF7	1.02946e+06	1.21412e+06	1.13565e+06	1.09772e+06	1.19298e+06	1.19619e+06	1.13565e+06	1.19298e+06	0.0822725	0.0481369	0.0710474	0.0555556	0	0.689376
tr|O96150|O96150_PLAF7	O96150	PF3D7_0205500	DNA-directed RNA polymerase II 16 kDa subunit,putative OS=Plasmodium falciparum (isolate 3D7) OX=36329 GN=PF3D7_0205500 PE=4 SV=1	42.93	0.00292826	2	tr|O96150|O96150_PLAF7	153314	81778.3	102193	187031	116121	81271.6	102193	116121	0.327765	0.420586	0.184343	0.333333	0.166667	0.689378
tr|O77345|O77345_PLAF7	O77345	PF3D7_0312300	26S proteasome regulatory subunit RPN12,putative OS=Plasmodium falciparum (isolate 3D7) OX=36329 GN=PF3D7_0312300 PE=4 SV=1	152.72	0	2	tr|O77345|O77345_PLAF7	1.76802e+06	4.09061e+06	3.99679e+06	3.6533e+06	3.48936e+06	3.05295e+06	3.99679e+06	3.48936e+06	0.400197	0.0913073	-0.195879	0	0	0.6901
tr|Q8II23|Q8II23_PLAF7	Q8II23	PF3D7_1134100	Protein disulfide isomerase OS=Plasmodium falciparum (isolate 3D7) OX=36329 GN=PF3D7_1134100 PE=4 SV=1	590.75	0	15	tr|Q8II23|Q8II23_PLAF7	1.35626e+07	1.19954e+07	1.21964e+07	1.20902e+07	1.25102e+07	1.19879e+07	1.21964e+07	1.20902e+07	0.0677616	0.0226927	-0.0126177	0.0526316	0.0350877	0.69089
tr|Q8I6U4|Q8I6U4_PLAF7	Q8I6U4	PF3D7_1115700	Cysteine proteinase falcipain 2a OS=Plasmodium falciparum (isolate 3D7) OX=36329 GN=PF3D7_1115700 PE=1 SV=1	739.02	0	14	tr|Q8I6U4|Q8I6U4_PLAF7	7.83431e+07	5.451e+07	5.20704e+07	6.55578e+07	5.13343e+07	5.57322e+07	5.451e+07	5.57322e+07	0.235486	0.126558	0.0319899	0.0724638	0.0434783	0.690971
tr|Q8IJN9|Q8IJN9_PLAF7	Q8IJN9	PF3D7_1015600	Heat shock protein 60 OS=Plasmodium falciparum (isolate 3D7) OX=36329 GN=PF3D7_1015600 PE=3 SV=1	2879.1	0	45	tr|Q8IJN9|Q8IJN9_PLAF7	2.77565e+08	2.30963e+08	2.23865e+08	2.84125e+08	2.57394e+08	2.22772e+08	2.30963e+08	2.57394e+08	0.119491	0.120742	0.156314	0.0392157	0.0441176	0.692128
tr|Q8IIG3|Q8IIG3_PLAF7	Q8IIG3	PF3D7_1120400	Alpha/beta hydrolase fold domain containing protein, putative OS=Plasmodium falciparum (isolate 3D7) OX=36329 GN=PF3D7_1120400 PE=4 SV=1	81.87	0	3	tr|Q8IIG3|Q8IIG3_PLAF7	667296	260409	270520	411323	253853	317150	270520	317150	0.580991	0.241991	0.229432	0	0	0.692547
tr|Q8ILR4|Q8ILR4_PLAF7	Q8ILR4	PF3D7_1418200	Uncharacterized protein OS=Plasmodium falciparum (isolate 3D7) OX=36329 GN=PF3D7_1418200 PE=4 SV=2	43.36	0.00220264	1	tr|Q8ILR4|Q8ILR4_PLAF7	48250.8	263094	153389	97832.8	250506	141871	153389	141871	0.693493	0.480904	-0.112612	0.333333	0	0.69341
tr|C6KSN9|C6KSN9_PLAF7	C6KSN9	PF3D7_0604100	Transcription factor with AP2 domain(S) OS=Plasmodium falciparum (isolate 3D7) OX=36329 GN=PF3D7_0604100 PE=4 SV=1	42.47	0.00291758	1	tr|C6KSN9|C6KSN9_PLAF7	746766	214869	255515	582705	247734	163983	255515	247734	0.72971	0.668425	-0.0446172	0	0	0.693447
tr|Q8I3Z9|Q8I3Z9_PLAF7	Q8I3Z9	PF3D7_0510500	Topoisomerase I OS=Plasmodium falciparum (isolate 3D7) OX=36329 GN=PF3D7_0510500 PE=4 SV=1	138.91	0	7	tr|Q8I3Z9|Q8I3Z9_PLAF7	1.60299e+06	715148	872919	981747	841526	933683	872919	933683	0.445306	0.0775387	0.0970839	0.0952381	0	0.694352
tr|Q8IBG5|Q8IBG5_PLAF7	Q8IBG5	PF3D7_0729400	Ribosome biogenesis protein BRX1 homolog,putative OS=Plasmodium falciparum (isolate 3D7) OX=36329 GN=PF3D7_0729400 PE=4 SV=1	44.22	0.00221402	2	tr|Q8IBG5|Q8IBG5_PLAF7	677393	703940	585627	602614	672172	779267	677393	672172	0.0946843	0.12997	-0.0111635	0	0	0.694532
tr|Q8IFP1|Q8IFP1_PLAF7	Q8IFP1	PF3D7_0422500	Pre-mRNA-splicing helicase BRR2, putative OS=Plasmodium falciparum (isolate 3D7) OX=36329 GN=PF3D7_0422500 PE=4 SV=1	544.9	0	17	tr|Q8IFP1|Q8IFP1_PLAF7	5.30326e+06	5.48885e+06	4.71451e+06	4.9789e+06	5.79067e+06	5.26956e+06	5.30326e+06	5.26956e+06	0.0782149	0.0769306	-0.00919685	0	0	0.694575
tr|Q8IB48|Q8IB48_PLAF7	Q8IB48	PF3D7_0821400	Uncharacterized protein OS=Plasmodium falciparum (isolate 3D7) OX=36329 GN=PF3D7_0821400 PE=4 SV=1	72.68	0.000859845	3	tr|Q8IB48|Q8IB48_PLAF7	4.87722e+06	7.66741e+06	5.92631e+06	4.25495e+06	6.64449e+06	6.36055e+06	5.92631e+06	6.36055e+06	0.228899	0.22689	0.102017	0	0	0.694964
tr|Q8I305|Q8I305_PLAF7	Q8I305	PF3D7_0914700	Transporter, putative OS=Plasmodium falciparum (isolate 3D7) OX=36329 GN=PF3D7_0914700 PE=4 SV=1	870.78	0	11	tr|Q8I305|Q8I305_PLAF7	6.65497e+07	4.92474e+07	5.16381e+07	5.53545e+07	5.63099e+07	6.1646e+07	5.16381e+07	5.63099e+07	0.167991	0.0586877	0.124953	0	0	0.695058
tr|C6KT75|C6KT75_PLAF7	C6KT75	PF3D7_0623900	Ribonuclease OS=Plasmodium falciparum (isolate 3D7) OX=36329 GN=PF3D7_0623900 PE=3 SV=1	163.82	0	3	tr|C6KT75|C6KT75_PLAF7	686039	1.00026e+06	1.01784e+06	793882	1.03152e+06	1.01349e+06	1.00026e+06	1.01349e+06	0.207124	0.139812	0.0189551	0	0	0.696295
tr|Q8I2F2|Q8I2F2_PLAF7	Q8I2F2	PF3D7_0936800	PRESAN domain-containing protein OS=Plasmodium falciparum (isolate 3D7) OX=36329 GN=PF3D7_0936800 PE=1 SV=1	903.8	0	22	tr|Q8I2F2|Q8I2F2_PLAF7	4.18725e+07	3.20569e+07	2.98448e+07	4.11641e+07	3.24168e+07	3.47858e+07	3.20569e+07	3.47858e+07	0.185071	0.125247	0.117864	0	0	0.696553
tr|Q8IJS2|Q8IJS2_PLAF7	Q8IJS2	PF3D7_1012300	Cytochrome b-c1 complex subunit 7, putative OS=Plasmodium falciparum (isolate 3D7) OX=36329 GN=PF3D7_1012300 PE=4 SV=1	49.28	0.000765111	2	tr|Q8IJS2|Q8IJS2_PLAF7	110867	336178	381613	423111	225288	233269	336178	233269	0.524909	0.381028	-0.527229	0.111111	0.111111	0.69729
tr|Q8IDV1|Q8IDV1_PLAF7	Q8IDV1	PF3D7_1338200	60S ribosomal protein L6-2, putative OS=Plasmodium falciparum (isolate 3D7) OX=36329 GN=PF3D7_1338200 PE=1 SV=1	1190.68	0	17	tr|Q8IDV1|Q8IDV1_PLAF7	3.90819e+08	2.62107e+08	2.60753e+08	2.95303e+08	2.67114e+08	2.89329e+08	2.62107e+08	2.89329e+08	0.245291	0.0523169	0.142555	0.0860215	0.107527	0.697611
sp|P46468|CDAT_PLAF7	P46468	PF07_0047	Putative cell division cycle ATPase OS=Plasmodium falciparum (isolate 3D7) OX=36329 GN=PF07_0047 PE=3 SV=2	741.25	0	16	sp|P46468|CDAT_PLAF7	1.58764e+07	1.43993e+07	1.43067e+07	1.44812e+07	1.42254e+07	1.45781e+07	1.43993e+07	1.44812e+07	0.0592681	0.0126284	0.00818393	0.0793651	0.0634921	0.697922
tr|Q8I2X7|Q8I2X7_PLAF7	Q8I2X7	PF3D7_0917600	Pre-mRNA-splicing factor ATP-dependent RNA helicase PRP43, putative OS=Plasmodium falciparum (isolate 3D7) OX=36329 GN=PF3D7_0917600 PE=4 SV=1	154.1	0	5	tr|Q8I2X7|Q8I2X7_PLAF7	1.1218e+06	1.07451e+06	993816	978654	1.04179e+06	1.07416e+06	1.07451e+06	1.04179e+06	0.0608564	0.0470859	-0.0446145	0.0666667	0	0.698692
tr|Q8ILI2|Q8ILI2_PLAF7	Q8ILI2	PF3D7_1428300	Proliferation-associated protein 2g4, putative OS=Plasmodium falciparum (isolate 3D7) OX=36329 GN=PF3D7_1428300 PE=4 SV=1	875.79	0	25	tr|Q8ILI2|Q8ILI2_PLAF7	7.06092e+07	7.19912e+07	7.5814e+07	7.05288e+07	6.67926e+07	7.49863e+07	7.19912e+07	7.05288e+07	0.0370317	0.0579648	-0.0296063	0.0111111	0.0333333	0.699327
tr|Q8IJ88|Q8IJ88_PLAF7	Q8IJ88	PF3D7_1031700	Protein phosphatase inhibitor 3 OS=Plasmodium falciparum (isolate 3D7) OX=36329 GN=PF3D7_1031700 PE=4 SV=2	34.4	0.00685401	1	tr|Q8IJ88|Q8IJ88_PLAF7	237671	547353	576310	336213	398284	415020	547353	398284	0.413668	0.108358	-0.458674	0	0	0.700362
tr|Q8IJX4|Q8IJX4_PLAF7	Q8IJX4	PF3D7_1006700	Uncharacterized protein OS=Plasmodium falciparum (isolate 3D7) OX=36329 GN=PF3D7_1006700 PE=4 SV=2	269.84	0	9	tr|Q8IJX4|Q8IJX4_PLAF7	1.00659e+07	8.23609e+06	7.08788e+06	7.32139e+06	8.57855e+06	8.17905e+06	8.23609e+06	8.17905e+06	0.177468	0.0800295	-0.0100275	0	0	0.700698
tr|C6KT19|C6KT19_PLAF7	C6KT19	PF3D7_0617900	Histone H3 OS=Plasmodium falciparum (isolate 3D7) OX=36329 GN=PF3D7_0617900 PE=3 SV=1	286.08	0	5	tr|C6KT19|C6KT19_PLAF7	5.91562e+07	3.226e+07	3.64948e+07	4.59656e+07	3.50805e+07	3.48188e+07	3.64948e+07	3.50805e+07	0.339186	0.16471	-0.0570205	0	0	0.70251
tr|A0A144A153|A0A144A153_PLAF7	A0A144A153	PF3D7_1405900	RNA-binding protein, putative OS=Plasmodium falciparum (isolate 3D7) OX=36329 GN=PF3D7_1405900 PE=4 SV=1	179.47	0	8	tr|A0A144A153|A0A144A153_PLAF7	3.31178e+06	2.59452e+06	2.89442e+06	3.29506e+06	2.74215e+06	3.09043e+06	2.89442e+06	3.09043e+06	0.122795	0.0918806	0.0945311	0	0	0.702582
tr|Q8IM76|Q8IM76_PLAF7	Q8IM76	PF3D7_1401200	Uncharacterized protein OS=Plasmodium falciparum (isolate 3D7) OX=36329 GN=PF3D7_1401200 PE=4 SV=1	60.42	0.000818331	3	tr|Q8IM76|Q8IM76_PLAF7	337404	384161	287487	308086	393815	350338	337404	350338	0.143736	0.122213	0.0542691	0	0	0.703003
tr|Q8IL75|Q8IL75_PLAF7	Q8IL75	PF3D7_1439400	Ubiquinol-cytochrome c reductase iron-sulfur subunit, putative OS=Plasmodium falciparum (isolate 3D7) OX=36329 GN=PF3D7_1439400 PE=4 SV=1	32.92	0.00813008	2	tr|Q8IL75|Q8IL75_PLAF7	386959	469838	422220	555145	431767	250176	422220	431767	0.0975578	0.372022	0.0322604	0	0	0.703871
tr|Q8IHZ1|Q8IHZ1_PLAF7	Q8IHZ1	PF3D7_1137400	UVB-resistance protein UVR8 homologue OS=Plasmodium falciparum (isolate 3D7) OX=36329 GN=PF3D7_1137400 PE=4 SV=1	108.7	0	4	tr|Q8IHZ1|Q8IHZ1_PLAF7	2.1935e+06	1.39542e+06	1.4076e+06	1.8009e+06	1.65871e+06	1.70189e+06	1.4076e+06	1.70189e+06	0.274569	0.0423716	0.273902	0	0	0.704107
tr|Q8IK07|Q8IK07_PLAF7	Q8IK07	PF3D7_1002900	Uncharacterized protein OS=Plasmodium falciparum (isolate 3D7) OX=36329 GN=PF3D7_1002900 PE=4 SV=2	296.96	0	3	tr|Q8IK07|Q8IK07_PLAF7	1.52584e+07	1.06125e+07	9.37804e+06	1.28738e+07	1.0823e+07	9.01937e+06	1.06125e+07	1.0823e+07	0.263902	0.176844	0.0283418	0	0	0.704189
tr|C0H5A4|C0H5A4_PLAF7	C0H5A4	PF3D7_1306900	U1 small nuclear ribonucleoprotein A, putative OS=Plasmodium falciparum (isolate 3D7) OX=36329 GN=PF3D7_1306900 PE=4 SV=1	52.35	0.00078125	3	tr|C0H5A4|C0H5A4_PLAF7	1.20845e+06	1.48602e+06	1.73298e+06	957427	1.72014e+06	1.52557e+06	1.48602e+06	1.52557e+06	0.177809	0.282867	0.0379011	0	0	0.705164
tr|Q8I0U9|Q8I0U9_PLAF7	Q8I0U9	PF3D7_0530200	Phosphoenolpyruvate/phosphate translocator OS=Plasmodium falciparum (isolate 3D7) OX=36329 GN=PF3D7_0530200 PE=4 SV=1	91.92	0	3	tr|Q8I0U9|Q8I0U9_PLAF7	2.45055e+06	2.48176e+06	2.02378e+06	2.37558e+06	2.13878e+06	2.18388e+06	2.45055e+06	2.18388e+06	0.110356	0.0563164	-0.166212	0.111111	0	0.706293
tr|Q8IL58|Q8IL58_PLAF7	Q8IL58	PF3D7_1441200	60S ribosomal protein L1, putative OS=Plasmodium falciparum (isolate 3D7) OX=36329 GN=PF3D7_1441200 PE=4 SV=1	1367.02	0	21	tr|Q8IL58|Q8IL58_PLAF7	1.4538e+08	1.19254e+08	1.14736e+08	1.28043e+08	1.21204e+08	1.15105e+08	1.19254e+08	1.21204e+08	0.130818	0.0532941	0.0233971	0.0462963	0.0555556	0.706848
tr|Q8IAX5|Q8IAX5_PLAF7	Q8IAX5	PF3D7_0813900	40S ribosomal protein S16, putative OS=Plasmodium falciparum (isolate 3D7) OX=36329 GN=PF3D7_0813900 PE=1 SV=1	593.79	0	15	tr|Q8IAX5|Q8IAX5_PLAF7	1.95752e+08	1.5129e+08	1.65147e+08	1.53374e+08	1.5892e+08	1.79193e+08	1.65147e+08	1.5892e+08	0.133254	0.0829613	-0.0554549	0.0350877	0.0175439	0.709574
tr|Q8IJZ2|Q8IJZ2_PLAF7	Q8IJZ2	PF3D7_1004500	Uncharacterized protein OS=Plasmodium falciparum (isolate 3D7) OX=36329 GN=PF3D7_1004500 PE=4 SV=1	40.3	0.0035868	2	tr|Q8IJZ2|Q8IJZ2_PLAF7	960628	708269	816231	755513	928253	899669	816231	899669	0.15285	0.107519	0.140416	0.166667	0	0.710062
tr|Q8II32|Q8II32_PLAF7	Q8II32	PF3D7_1133200	Uncharacterized protein OS=Plasmodium falciparum (isolate 3D7) OX=36329 GN=PF3D7_1133200 PE=4 SV=1	259.93	0	10	tr|Q8II32|Q8II32_PLAF7	1.9057e+06	1.91705e+06	1.75949e+06	1.79241e+06	1.97164e+06	1.65868e+06	1.9057e+06	1.79241e+06	0.0472245	0.0868744	-0.0884249	0.0666667	0.0333333	0.710705
tr|C6KSR3|C6KSR3_PLAF7	C6KSR3	PF3D7_0606500	Polypyrimidine tract-binding protein, putative OS=Plasmodium falciparum (isolate 3D7) OX=36329 GN=PF3D7_0606500 PE=4 SV=1	233.85	0	8	tr|C6KSR3|C6KSR3_PLAF7	2.21185e+06	2.30352e+06	2.53837e+06	2.30303e+06	2.48279e+06	2.46709e+06	2.30352e+06	2.46709e+06	0.0716275	0.0411827	0.0989726	0	0	0.711588
tr|Q8IDK3|Q8IDK3_PLAF7	Q8IDK3	PF3D7_1349600	Uncharacterized protein OS=Plasmodium falciparum (isolate 3D7) OX=36329 GN=PF3D7_1349600 PE=4 SV=1	63.56	0.000827815	3	tr|Q8IDK3|Q8IDK3_PLAF7	541708	1.0871e+06	986452	652617	1.16269e+06	1.00592e+06	986452	1.00592e+06	0.332921	0.277825	0.0281926	0	0	0.71173
tr|Q8IDA3|Q8IDA3_PLAF7	Q8IDA3	PF3D7_1360200	ER membrane protein complex subunit 3 OS=Plasmodium falciparum (isolate 3D7) OX=36329 GN=PF3D7_1360200 PE=3 SV=1	173.79	0	2	tr|Q8IDA3|Q8IDA3_PLAF7	2.78881e+06	1.56897e+06	1.19586e+06	1.67037e+06	1.45256e+06	1.67936e+06	1.56897e+06	1.67037e+06	0.450048	0.0802268	0.0903498	0	0	0.712689
tr|Q8IM23|Q8IM23_PLAF7	Q8IM23	PF3D7_1407100	rRNA 2'-O-methyltransferase fibrillarin,putative OS=Plasmodium falciparum (isolate 3D7) OX=36329 GN=PF3D7_1407100 PE=3 SV=1	725.37	0	15	tr|Q8IM23|Q8IM23_PLAF7	4.42601e+07	3.29824e+07	3.61069e+07	4.09012e+07	3.73848e+07	3.85975e+07	3.61069e+07	3.85975e+07	0.154109	0.0458452	0.096234	0.0701754	0.0526316	0.712785
tr|Q8I275|Q8I275_PLAF7	Q8I275	PF3D7_0106700	Small ribosomal subunit assembling AARP2 protein OS=Plasmodium falciparum (isolate 3D7) OX=36329 GN=PF3D7_0106700 PE=4 SV=1	73.74	0.000864304	2	tr|Q8I275|Q8I275_PLAF7	1.00538e+06	114527	137105	173272	246200	190625	137105	190625	1.21226	0.187334	0.475455	0.333333	0	0.713712
tr|C0H4Z7|C0H4Z7_PLAF7	C0H4Z7	PF3D7_0831400	Uncharacterized protein OS=Plasmodium falciparum (isolate 3D7) OX=36329 GN=PF3D7_0831400 PE=4 SV=1	427.49	0	10	tr|C0H4Z7|C0H4Z7_PLAF7	4.27166e+07	3.00548e+07	2.92997e+07	3.75812e+07	3.46418e+07	3.32025e+07	3.00548e+07	3.46418e+07	0.221543	0.0635071	0.204916	0.0555556	0	0.715611
tr|Q8IDW4|Q8IDW4_PLAF7	Q8IDW4	PF3D7_1336800	Nuclear movement protein, putative OS=Plasmodium falciparum (isolate 3D7) OX=36329 GN=PF3D7_1336800 PE=4 SV=1	456.1	0	13	tr|Q8IDW4|Q8IDW4_PLAF7	9.54382e+06	1.82299e+07	1.52731e+07	1.26492e+07	1.54489e+07	1.67447e+07	1.52731e+07	1.54489e+07	0.307771	0.140041	0.0165159	0	0	0.716573
tr|Q8I669|Q8I669_PLAF7	Q8I669	PF3D7_0202200	EMP1-trafficking protein OS=Plasmodium falciparum (isolate 3D7) OX=36329 GN=PF3D7_0202200 PE=4 SV=1	306.38	0	5	tr|Q8I669|Q8I669_PLAF7	9.99413e+06	5.73804e+06	5.34396e+06	9.23179e+06	7.17143e+06	5.83664e+06	5.73804e+06	7.17143e+06	0.367035	0.230727	0.321703	0.037037	0.037037	0.717354
tr|Q9TY94|Q9TY94_PLAF7	Q9TY94	PF3D7_0209800	ATP-dependent RNA helicase UAP56 OS=Plasmodium falciparum (isolate 3D7) OX=36329 GN=PF3D7_0209800 PE=4 SV=1	2466.76	0	29	tr|Q9TY94|Q9TY94_PLAF7	2.11687e+08	2.39463e+08	2.46058e+08	2.14952e+08	2.31717e+08	2.29555e+08	2.39463e+08	2.29555e+08	0.0784882	0.0404576	-0.060963	0.0298507	0.039801	0.718188
tr|Q8IB94|Q8IB94_PLAF7	Q8IB94	PF3D7_0826100	E3 ubiquitin-protein ligase, putative OS=Plasmodium falciparum (isolate 3D7) OX=36329 GN=PF3D7_0826100 PE=4 SV=1	468.66	0	15	tr|Q8IB94|Q8IB94_PLAF7	1.02742e+07	7.97825e+06	9.12537e+06	7.88291e+06	8.94836e+06	9.49e+06	9.12537e+06	8.94836e+06	0.125792	0.0931925	-0.028259	0.0666667	0	0.718463
tr|C0H5J9|C0H5J9_PLAF7	C0H5J9	PF3D7_1361800	Uncharacterized protein OS=Plasmodium falciparum (isolate 3D7) OX=36329 GN=PF3D7_1361800 PE=4 SV=2	265.66	0	11	tr|C0H5J9|C0H5J9_PLAF7	5.70024e+06	5.41658e+06	5.70743e+06	5.58199e+06	5.73525e+06	5.93909e+06	5.70024e+06	5.73525e+06	0.02958	0.0311444	0.00883485	0.0606061	0.0606061	0.718821
tr|Q8I3A2|Q8I3A2_PLAF7	Q8I3A2	PF3D7_0904700	Bacterial histone-like protein OS=Plasmodium falciparum (isolate 3D7) OX=36329 GN=PF3D7_0904700 PE=3 SV=1	96.71	0	4	tr|Q8I3A2|Q8I3A2_PLAF7	5.41472e+06	4.77936e+06	5.33229e+06	4.6753e+06	5.25545e+06	5.14622e+06	5.33229e+06	5.14622e+06	0.0667573	0.0613437	-0.0512433	0	0	0.719071
tr|Q8I586|Q8I586_PLAF7	Q8I586	PF3D7_1233600	Asparagine and aspartate rich protein 1 OS=Plasmodium falciparum (isolate 3D7) OX=36329 GN=PF3D7_1233600 PE=4 SV=1	131.29	0	4	tr|Q8I586|Q8I586_PLAF7	671151	1.37312e+06	1.35504e+06	1.03734e+06	1.23638e+06	1.23039e+06	1.35504e+06	1.23039e+06	0.353159	0.0969339	-0.139223	0.0833333	0	0.720027
tr|C6KSR8|C6KSR8_PLAF7	C6KSR8	PF3D7_0607000	Translation initiation factor IF-2, putative OS=Plasmodium falciparum (isolate 3D7) OX=36329 GN=PF3D7_0607000 PE=4 SV=1	1790.72	0	38	tr|C6KSR8|C6KSR8_PLAF7	4.60477e+07	3.86686e+07	3.80506e+07	4.20545e+07	3.81359e+07	3.83928e+07	3.86686e+07	3.83928e+07	0.108729	0.0554549	-0.0103283	0.0138889	0	0.720225
tr|C6KTC9|C6KTC9_PLAF7	C6KTC9	PF3D7_0629400	RNA-binding protein, putative OS=Plasmodium falciparum (isolate 3D7) OX=36329 GN=PF3D7_0629400 PE=4 SV=1	94.6	0	4	tr|C6KTC9|C6KTC9_PLAF7	3.26251e+06	3.00871e+06	3.21804e+06	2.77686e+06	3.09024e+06	3.36122e+06	3.21804e+06	3.09024e+06	0.0428482	0.0950668	-0.0584619	0	0	0.720356
tr|O77376|O77376_PLAF7	O77376	PF3D7_0318100	Stomatin-like protein OS=Plasmodium falciparum (isolate 3D7) OX=36329 GN=PF3D7_0318100 PE=4 SV=1	169.32	0	5	tr|O77376|O77376_PLAF7	2.92988e+06	1.64167e+06	1.50737e+06	2.40445e+06	2.18505e+06	1.72264e+06	1.64167e+06	2.18505e+06	0.3876	0.165418	0.412505	0.0555556	0	0.721911
tr|Q8IM19|Q8IM19_PLAF7	Q8IM19	PF3D7_1407500	Multifunctional methyltransferase subunit TRM112, putative OS=Plasmodium falciparum (isolate 3D7) OX=36329 GN=PF3D7_1407500 PE=4 SV=2	73.23	0.000862813	3	tr|Q8IM19|Q8IM19_PLAF7	5.21669e+06	3.89656e+06	2.82705e+06	5.24931e+06	3.25476e+06	2.59972e+06	3.89656e+06	3.25476e+06	0.300748	0.372865	-0.25965	0.0833333	0.25	0.721943
tr|Q8I358|Q8I358_PLAF7	Q8I358	PF3D7_0909400	Exoribonuclease, putative OS=Plasmodium falciparum (isolate 3D7) OX=36329 GN=PF3D7_0909400 PE=4 SV=1	327.36	0	8	tr|Q8I358|Q8I358_PLAF7	4.19138e+06	4.81253e+06	4.73963e+06	4.28359e+06	4.77492e+06	4.28024e+06	4.73963e+06	4.28359e+06	0.0741168	0.0640191	-0.145955	0.121212	0.0909091	0.722719
tr|Q8IHZ2|Q8IHZ2_PLAF7	Q8IHZ2	PF3D7_1137300	Uncharacterized protein OS=Plasmodium falciparum (isolate 3D7) OX=36329 GN=PF3D7_1137300 PE=4 SV=1	172.77	0	6	tr|Q8IHZ2|Q8IHZ2_PLAF7	1.81621e+07	1.17811e+07	1.29983e+07	1.32364e+07	1.3448e+07	1.36045e+07	1.29983e+07	1.3448e+07	0.236682	0.0137569	0.0490712	0	0	0.723086
tr|Q8I3F0|Q8I3F0_PLAF7	Q8I3F0	PF3D7_0532400	Lysine-rich membrane-associated PHISTb protein OS=Plasmodium falciparum (isolate 3D7) OX=36329 GN=PF3D7_0532400 PE=4 SV=1	747.15	0	13	tr|Q8I3F0|Q8I3F0_PLAF7	3.56632e+07	2.20689e+07	2.20572e+07	3.22735e+07	2.51622e+07	2.54956e+07	2.20689e+07	2.54956e+07	0.29523	0.145165	0.208235	0.0333333	0.0166667	0.724525
tr|Q8IDC4|Q8IDC4_PLAF7	Q8IDC4	PF3D7_1358100	Small subunit rRNA processing factor, putative OS=Plasmodium falciparum (isolate 3D7) OX=36329 GN=PF3D7_1358100 PE=4 SV=1	95.93	0	5	tr|Q8IDC4|Q8IDC4_PLAF7	1.97912e+06	2.66288e+06	1.98016e+06	2.06862e+06	2.79932e+06	2.08233e+06	1.98016e+06	2.08233e+06	0.178704	0.180411	0.0725781	0	0	0.725099
tr|C0H4Y0|C0H4Y0_PLAF7	C0H4Y0	PF3D7_0826500	Ubiquitin conjugation factor E4 B, putative OS=Plasmodium falciparum (isolate 3D7) OX=36329 GN=PF3D7_0826500 PE=4 SV=1	361.86	0	9	tr|C0H4Y0|C0H4Y0_PLAF7	3.31569e+06	4.22242e+06	4.01266e+06	3.19517e+06	3.6519e+06	4.26243e+06	4.01266e+06	3.6519e+06	0.123286	0.144599	-0.13591	0.0606061	0.0909091	0.726091
tr|Q8I3K7|Q8I3K7_PLAF7	Q8I3K7	PF3D7_0525800	Inner membrane complex protein 1g, putative OS=Plasmodium falciparum (isolate 3D7) OX=36329 GN=PF3D7_0525800 PE=4 SV=1	35.14	0.00621547	2	tr|Q8I3K7|Q8I3K7_PLAF7	1.04357e+06	217884	110903	1.30838e+06	291907	150188	217884	291907	1.11575	1.08272	0.421944	0	0	0.727846
tr|C6KT51|C6KT51_PLAF7	C6KT51	PF3D7_0621300	mRNA binding Pumilio-homology domain protein,putative OS=Plasmodium falciparum (isolate 3D7) OX=36329 GN=PF3D7_0621300 PE=4 SV=1	51.94	0.000778816	2	tr|C6KT51|C6KT51_PLAF7	1.08946e+06	841276	857064	1.1465e+06	917979	849430	857064	917979	0.149532	0.160146	0.0990573	0	0	0.727859
tr|Q8IKE6|Q8IKE6_PLAF7	Q8IKE6	PF3D7_1469100	Uncharacterized protein OS=Plasmodium falciparum (isolate 3D7) OX=36329 GN=PF3D7_1469100 PE=4 SV=1	44.92	0.00148038	2	tr|Q8IKE6|Q8IKE6_PLAF7	140860	288260	375257	243936	278612	165803	288260	243936	0.441914	0.251831	-0.240868	0	0	0.728568
tr|Q8IDP4|Q8IDP4_PLAF7	Q8IDP4	trx2	Thioredoxin 2 OS=Plasmodium falciparum (isolate 3D7) OX=36329 GN=trx2 PE=1 SV=1	306.35	0	5	tr|Q8IDP4|Q8IDP4_PLAF7	5.71029e+06	3.82136e+06	4.4894e+06	4.52007e+06	4.80164e+06	5.13197e+06	4.4894e+06	4.80164e+06	0.204947	0.063569	0.0970072	0.0952381	0	0.729523
tr|Q8IJW4|Q8IJW4_PLAF7	Q8IJW4	PF3D7_1007900	Eukaryotic translation initiation factor 3 subunit D OS=Plasmodium falciparum (isolate 3D7) OX=36329 GN=PF3D7_1007900 PE=3 SV=1	1384.4	0	32	tr|Q8IJW4|Q8IJW4_PLAF7	9.5915e+07	8.05208e+07	7.5102e+07	7.7616e+07	8.24115e+07	8.24329e+07	8.05208e+07	8.24115e+07	0.128778	0.0343338	0.0334843	0.0542636	0.0232558	0.732041
tr|Q8II87|Q8II87_PLAF7	Q8II87	PF3D7_1127600	CRAL/TRIO domain-containing protein, putative OS=Plasmodium falciparum (isolate 3D7) OX=36329 GN=PF3D7_1127600 PE=4 SV=2	283.57	0	9	tr|Q8II87|Q8II87_PLAF7	8.00507e+06	1.20174e+07	1.30307e+07	1.17579e+07	1.12374e+07	1.10161e+07	1.20174e+07	1.12374e+07	0.241226	0.0335906	-0.0968158	0	0	0.73229
tr|Q8II01|Q8II01_PLAF7	Q8II01	PF3D7_1136300	Tudor staphylococcal nuclease OS=Plasmodium falciparum (isolate 3D7) OX=36329 GN=PF3D7_1136300 PE=4 SV=1	1355.05	0	32	tr|Q8II01|Q8II01_PLAF7	4.75996e+07	4.7263e+07	5.07854e+07	4.58172e+07	4.82593e+07	4.80294e+07	4.75996e+07	4.80294e+07	0.0400376	0.0284677	0.0129694	0.0243902	0.0162602	0.732297
tr|Q8IDH5|Q8IDH5_PLAF7	Q8IDH5	PF3D7_1352500	Thioredoxin-related protein, putative OS=Plasmodium falciparum (isolate 3D7) OX=36329 GN=PF3D7_1352500 PE=4 SV=1	658.41	0	11	tr|Q8IDH5|Q8IDH5_PLAF7	8.76401e+07	5.08932e+07	5.23296e+07	6.4256e+07	5.52258e+07	5.52439e+07	5.23296e+07	5.52439e+07	0.327149	0.0894262	0.0781869	0.0740741	0.0740741	0.732327
tr|Q8IL59|Q8IL59_PLAF7	Q8IL59	PF3D7_1441100	Uncharacterized protein OS=Plasmodium falciparum (isolate 3D7) OX=36329 GN=PF3D7_1441100 PE=4 SV=1	343.31	0	7	tr|Q8IL59|Q8IL59_PLAF7	6.92608e+07	5.61166e+07	5.77762e+07	6.58445e+07	5.3444e+07	5.75251e+07	5.77762e+07	5.75251e+07	0.117245	0.107229	-0.00628272	0	0	0.733669
tr|Q8IJK8|Q8IJK8_PLAF7	Q8IJK8	PF3D7_1019400	60S ribosomal protein L30e, putative OS=Plasmodium falciparum (isolate 3D7) OX=36329 GN=PF3D7_1019400 PE=1 SV=1	581.05	0	8	tr|Q8IJK8|Q8IJK8_PLAF7	1.03447e+08	1.05212e+08	9.79906e+07	1.20417e+08	1.00782e+08	9.62876e+07	1.03447e+08	1.00782e+08	0.0368295	0.121251	-0.0376522	0	0	0.736526
tr|Q8IKX4|Q8IKX4_PLAF7	Q8IKX4	PF3D7_1450100	Signal recognition particle 54 kDa protein OS=Plasmodium falciparum (isolate 3D7) OX=36329 GN=PF3D7_1450100 PE=3 SV=1	573.5	0	15	tr|Q8IKX4|Q8IKX4_PLAF7	1.39436e+07	1.08727e+07	1.01757e+07	1.19716e+07	1.02365e+07	1.12386e+07	1.08727e+07	1.12386e+07	0.171874	0.0781273	0.0477581	0.0555556	0.037037	0.736591
tr|Q8ILZ5|Q8ILZ5_PLAF7	Q8ILZ5	PF3D7_1410000	ER membrane protein complex subunit 2, putative OS=Plasmodium falciparum (isolate 3D7) OX=36329 GN=PF3D7_1410000 PE=4 SV=1	108.35	0	3	tr|Q8ILZ5|Q8ILZ5_PLAF7	3.96615e+06	1.37336e+06	1.52411e+06	2.08928e+06	1.54128e+06	1.89882e+06	1.52411e+06	1.89882e+06	0.636129	0.150947	0.317137	0	0	0.737687
tr|Q8IIQ6|Q8IIQ6_PLAF7	Q8IIQ6	PF3D7_1110500	Vacuolar protein sorting-associated protein 35 OS=Plasmodium falciparum (isolate 3D7) OX=36329 GN=PF3D7_1110500 PE=3 SV=1	171.13	0	4	tr|Q8IIQ6|Q8IIQ6_PLAF7	1.1702e+06	1.83731e+06	1.99895e+06	1.20153e+06	1.66648e+06	1.7782e+06	1.83731e+06	1.66648e+06	0.263249	0.197472	-0.140787	0	0	0.737739
tr|Q8I356|Q8I356_PLAF7	Q8I356	PF3D7_0909600	Uncharacterized protein OS=Plasmodium falciparum (isolate 3D7) OX=36329 GN=PF3D7_0909600 PE=4 SV=1	108.27	0	4	tr|Q8I356|Q8I356_PLAF7	925825	519989	534924	624250	525022	654737	534924	624250	0.348536	0.112791	0.222791	0.0666667	0	0.738693
tr|Q8IL38|Q8IL38_PLAF7	Q8IL38	LSM5	U6 snRNA-associated Sm-like protein LSm5 OS=Plasmodium falciparum (isolate 3D7) OX=36329 GN=LSM5 PE=3 SV=1	53.14	0	1	tr|Q8IL38|Q8IL38_PLAF7	642331	1.63542e+06	1.18428e+06	1.8969e+06	1.15354e+06	786690	1.18428e+06	1.15354e+06	0.430875	0.442239	-0.037937	0	0	0.739119
tr|Q8ILZ6|Q8ILZ6_PLAF7	Q8ILZ6	PF3D7_1409900	Phosphatidate cytidylyltransferase OS=Plasmodium falciparum (isolate 3D7) OX=36329 GN=PF3D7_1409900 PE=3 SV=1	124.56	0	3	tr|Q8ILZ6|Q8ILZ6_PLAF7	1.47046e+06	1.62894e+06	1.37636e+06	1.35891e+06	1.79979e+06	1.18248e+06	1.47046e+06	1.35891e+06	0.085561	0.219727	-0.113819	0.222222	0.222222	0.739614
tr|Q8I1Q4|Q8I1Q4_PLAF7	Q8I1Q4	PF3D7_0418300	Uncharacterized protein OS=Plasmodium falciparum (isolate 3D7) OX=36329 GN=PF3D7_0418300 PE=4 SV=1	48.13	0.00150716	1	tr|Q8I1Q4|Q8I1Q4_PLAF7	90634.1	243803	214924	164649	214888	177571	214924	177571	0.444442	0.14048	-0.275424	0	0	0.739823
tr|Q8I635|Q8I635_PLAF7	Q8I635	PF3D7_1201000	Uncharacterized protein OS=Plasmodium falciparum (isolate 3D7) OX=36329 GN=PF3D7_1201000 PE=4 SV=1	597.78	0	15	tr|Q8I635|Q8I635_PLAF7	3.85836e+07	2.02678e+07	1.86816e+07	3.51037e+07	2.31338e+07	2.28028e+07	2.02678e+07	2.31338e+07	0.427987	0.259439	0.19081	0.0185185	0.037037	0.740566
tr|O77351|O77351_PLAF7	O77351	PF3D7_0311600	Dolichyl-diphosphooligosaccharide--protein glycosyltransferase subunit 1 OS=Plasmodium falciparum (isolate 3D7) OX=36329 GN=PF3D7_0311600 PE=3 SV=2	47.5	0.00150376	2	tr|O77351|O77351_PLAF7	173080	176348	169325	180545	179930	170463	173080	179930	0.0203238	0.0319317	0.0559925	0	0	0.740934
tr|C6KT82|C6KT82_PLAF7	C6KT82	PF3D7_0624600	SNF2 helicase, putative OS=Plasmodium falciparum (isolate 3D7) OX=36329 GN=PF3D7_0624600 PE=4 SV=1	1865.16	0	49	tr|C6KT82|C6KT82_PLAF7	3.40782e+07	3.77936e+07	3.35847e+07	3.73389e+07	3.76136e+07	3.33736e+07	3.40782e+07	3.73389e+07	0.0654531	0.065709	0.13183	0.0424242	0.030303	0.741316
tr|C6KT56|C6KT56_PLAF7	C6KT56	PF3D7_0621900	Signal recognition particle subunit SRP68,putative OS=Plasmodium falciparum (isolate 3D7) OX=36329 GN=PF3D7_0621900 PE=4 SV=1	349.11	0	10	tr|C6KT56|C6KT56_PLAF7	5.01057e+06	5.10059e+06	5.37367e+06	4.75574e+06	4.81036e+06	5.54171e+06	5.10059e+06	4.81036e+06	0.0366331	0.0871468	-0.0845203	0.0277778	0	0.742002
tr|Q8I3A0|Q8I3A0_PLAF7	Q8I3A0	PF3D7_0904900	Copper-transporting ATPase OS=Plasmodium falciparum (isolate 3D7) OX=36329 GN=PF3D7_0904900 PE=4 SV=2	193.6	0	4	tr|Q8I3A0|Q8I3A0_PLAF7	738830	911145	991036	900831	920940	713481	911145	900831	0.146415	0.135388	-0.0164237	0	0	0.743168
tr|Q8IIW4|Q8IIW4_PLAF7	Q8IIW4	PF3D7_1103800	CCR4-NOT transcription complex subunit 1,putative OS=Plasmodium falciparum (isolate 3D7) OX=36329 GN=PF3D7_1103800 PE=4 SV=1	129.34	0	5	tr|Q8IIW4|Q8IIW4_PLAF7	231419	827833	459256	414342	615684	479230	459256	479230	0.594587	0.204277	0.061418	0.0555556	0	0.743318
tr|Q8I2K4|Q8I2K4_PLAF7	Q8I2K4	PF3D7_0931100	Nucleolar protein Nop52, putative OS=Plasmodium falciparum (isolate 3D7) OX=36329 GN=PF3D7_0931100 PE=4 SV=1	98.45	0	5	tr|Q8I2K4|Q8I2K4_PLAF7	486606	893344	900897	609660	837271	948452	893344	837271	0.31178	0.216289	-0.093522	0	0	0.744447
tr|Q8I289|Q8I289_PLAF7	Q8I289	PF3D7_0105200	RAP protein, putative OS=Plasmodium falciparum (isolate 3D7) OX=36329 GN=PF3D7_0105200 PE=4 SV=1	856.02	0	18	tr|Q8I289|Q8I289_PLAF7	1.00556e+07	7.61796e+06	8.33757e+06	8.35404e+06	9.06091e+06	9.30322e+06	8.33757e+06	9.06091e+06	0.144453	0.055375	0.120028	0	0	0.745721
tr|Q8I3B3|Q8I3B3_PLAF7	Q8I3B3	PF3D7_0903500	Uncharacterized protein OS=Plasmodium falciparum (isolate 3D7) OX=36329 GN=PF3D7_0903500 PE=4 SV=1	94.02	0	4	tr|Q8I3B3|Q8I3B3_PLAF7	143401	839550	516845	271003	637920	588718	516845	588718	0.696859	0.398951	0.187844	0.0833333	0	0.74723
tr|Q8IKS4|Q8IKS4_PLAF7	Q8IKS4	PF3D7_1455400	Hemolysin III OS=Plasmodium falciparum (isolate 3D7) OX=36329 GN=PF3D7_1455400 PE=4 SV=2	76.14	0.0008726	2	tr|Q8IKS4|Q8IKS4_PLAF7	2.31045e+06	2.09512e+06	1.86035e+06	2.13584e+06	2.0092e+06	2.29135e+06	2.09512e+06	2.13584e+06	0.107782	0.06587	0.0277749	0	0	0.748633
tr|Q8IKZ7|Q8IKZ7_PLAF7	Q8IKZ7	PF3D7_1447800	Calponin homology domain-containing protein,putative OS=Plasmodium falciparum (isolate 3D7) OX=36329 GN=PF3D7_1447800 PE=4 SV=1	86.3	0	2	tr|Q8IKZ7|Q8IKZ7_PLAF7	457136	383780	232445	329909	314835	483969	383780	329909	0.320242	0.248785	-0.218214	0	0	0.749134
tr|Q8I5H4|Q8I5H4_PLAF7	Q8I5H4	PF3D7_1224300	Polyadenylate-binding protein OS=Plasmodium falciparum (isolate 3D7) OX=36329 GN=PF3D7_1224300 PE=3 SV=1	3085.96	0	52	tr|Q8I5H4|Q8I5H4_PLAF7	5.02448e+08	4.92384e+08	4.59076e+08	4.31591e+08	5.04825e+08	4.82218e+08	4.92384e+08	4.82218e+08	0.0468396	0.0793013	-0.0300965	0.0352941	0.0352941	0.749204
tr|Q8II57|Q8II57_PLAF7	Q8II57	PF3D7_1130700	Structural maintenance of chromosomes protein 1,putative OS=Plasmodium falciparum (isolate 3D7) OX=36329 GN=PF3D7_1130700 PE=4 SV=1	345.34	0	12	tr|Q8II57|Q8II57_PLAF7	4.70025e+06	5.15532e+06	4.34546e+06	4.19386e+06	4.82913e+06	4.77956e+06	4.70025e+06	4.77956e+06	0.0857604	0.0767975	0.0241423	0	0	0.749876
tr|Q8IIA8|Q8IIA8_PLAF7	Q8IIA8	PF3D7_1125500	Small nuclear ribonucleoprotein Sm D1 OS=Plasmodium falciparum (isolate 3D7) OX=36329 GN=PF3D7_1125500 PE=3 SV=1	219.81	0	6	tr|Q8IIA8|Q8IIA8_PLAF7	3.03694e+06	5.38614e+06	6.07635e+06	4.46325e+06	5.60178e+06	4.8169e+06	5.38614e+06	4.8169e+06	0.329678	0.117468	-0.161146	0	0	0.751193
tr|Q8IBK1|Q8IBK1_PLAF7	Q8IBK1	PF3D7_0725000	Exonuclease I, putative OS=Plasmodium falciparum (isolate 3D7) OX=36329 GN=PF3D7_0725000 PE=4 SV=1	39.65	0.00357398	1	tr|Q8IBK1|Q8IBK1_PLAF7	15348.9	37048.6	39490.5	35867.7	39652.9	10230	37048.6	35867.7	0.433881	0.560003	-0.0467334	0	0	0.751515
tr|C6KSX2|C6KSX2_PLAF7	C6KSX2	PF3D7_0612900	Nucleolar GTP-binding protein 1 OS=Plasmodium falciparum (isolate 3D7) OX=36329 GN=PF3D7_0612900 PE=3 SV=1	422.36	0	12	tr|C6KSX2|C6KSX2_PLAF7	1.15157e+07	1.01102e+07	1.05258e+07	1.08261e+07	1.15378e+07	1.05604e+07	1.05258e+07	1.08261e+07	0.0673731	0.0460524	0.0405797	0.0277778	0	0.752622
tr|Q8I425|Q8I425_PLAF7	Q8I425	PF3D7_0507800	Uncharacterized protein OS=Plasmodium falciparum (isolate 3D7) OX=36329 GN=PF3D7_0507800 PE=4 SV=1	97.38	0	5	tr|Q8I425|Q8I425_PLAF7	144243	496327	423485	231147	465613	403903	423485	403903	0.52399	0.331264	-0.0683035	0.2	0.133333	0.753431
tr|Q8I2X4|Q8I2X4_PLAF7	Q8I2X4	PF3D7_0917900	Heat shock protein 70 OS=Plasmodium falciparum (isolate 3D7) OX=36329 GN=PF3D7_0917900 PE=3 SV=1	5652.71	0	68	tr|Q8I2X4|Q8I2X4_PLAF7	1.82965e+09	1.48057e+09	1.49182e+09	1.7913e+09	1.60805e+09	1.53697e+09	1.49182e+09	1.60805e+09	0.123931	0.0797473	0.108241	0.0258216	0.0352113	0.754377
tr|O77396|O77396_PLAF7	O77396	PF3D7_0317000	Proteasome subunit alpha type-3, putative OS=Plasmodium falciparum (isolate 3D7) OX=36329 GN=PF3D7_0317000 PE=1 SV=1	503.76	0	12	tr|O77396|O77396_PLAF7	2.49372e+07	2.70264e+07	2.86993e+07	2.28895e+07	2.51839e+07	3.04452e+07	2.70264e+07	2.51839e+07	0.0701019	0.148005	-0.101866	0	0.0208333	0.754655
tr|Q8IIE2|Q8IIE2_PLAF7	Q8IIE2	PF3D7_1122400	Uncharacterized protein OS=Plasmodium falciparum (isolate 3D7) OX=36329 GN=PF3D7_1122400 PE=4 SV=1	83.21	0	3	tr|Q8IIE2|Q8IIE2_PLAF7	173882	288913	465181	225407	255775	316887	288913	255775	0.474318	0.175147	-0.175757	0	0	0.756228
tr|Q8IIS4|Q8IIS4_PLAF7	Q8IIS4	PF3D7_1107800	Transcription factor with AP2 domain(S) OS=Plasmodium falciparum (isolate 3D7) OX=36329 GN=PF3D7_1107800 PE=4 SV=1	152.7	0	7	tr|Q8IIS4|Q8IIS4_PLAF7	4.32097e+06	2.95511e+06	2.81239e+06	3.07612e+06	3.12591e+06	3.29689e+06	2.95511e+06	3.12591e+06	0.247662	0.0365721	0.0810668	0.047619	0	0.757288
tr|Q8IM26|Q8IM26_PLAF7	Q8IM26	PF3D7_1406800	Glideosome associated protein with multiple membrane spans 3 OS=Plasmodium falciparum (isolate 3D7) OX=36329 GN=PF3D7_1406800 PE=4 SV=1	31.46	0.00937082	2	tr|Q8IM26|Q8IM26_PLAF7	288154	33766.6	59416.8	154123	63252.5	31826.8	59416.8	63252.5	1.10182	0.764565	0.0902519	0.333333	0.5	0.757638
tr|C6KSV0|C6KSV0_PLAF7	C6KSV0	PF3D7_0610400	Histone H3 OS=Plasmodium falciparum (isolate 3D7) OX=36329 GN=PF3D7_0610400 PE=3 SV=1	573.69	0	12	tr|C6KSV0|C6KSV0_PLAF7	5.81531e+08	2.98032e+08	3.09554e+08	4.52828e+08	3.27243e+08	2.94293e+08	3.09554e+08	3.27243e+08	0.404809	0.233599	0.0801696	0	0	0.758612
tr|O96145|O96145_PLAF7	O96145	PF3D7_0204900	2-methoxy-6-polyprenyl-1,4-benzoquinol methylase, mitochondrial OS=Plasmodium falciparum (isolate 3D7) OX=36329 GN=PF3D7_0204900 PE=3 SV=1	38.57	0.00424628	1	tr|O96145|O96145_PLAF7	104970	626.386	626.386	20780.5	626.386	626.386	626.386	626.386	1.70141	1.58433	0	0.666667	0.666667	0.75875
tr|Q8IEQ6|Q8IEQ6_PLAF7	Q8IEQ6	PF3D7_1305900	Uncharacterized protein OS=Plasmodium falciparum (isolate 3D7) OX=36329 GN=PF3D7_1305900 PE=4 SV=1	51.77	0.000777605	2	tr|Q8IEQ6|Q8IEQ6_PLAF7	482001	387571	375755	348362	489801	463644	387571	463644	0.140278	0.173423	0.258557	0.166667	0	0.75961
tr|C0H5L7|C0H5L7_PLAF7	C0H5L7	PF3D7_1369500	Uncharacterized protein OS=Plasmodium falciparum (isolate 3D7) OX=36329 GN=PF3D7_1369500 PE=4 SV=1	262.41	0	9	tr|C0H5L7|C0H5L7_PLAF7	7.47718e+06	6.39112e+06	6.04822e+06	6.27914e+06	6.99167e+06	7.16281e+06	6.39112e+06	6.99167e+06	0.112368	0.0688075	0.129568	0.0333333	0	0.76154
tr|Q8IB67|Q8IB67_PLAF7	Q8IB67	PF3D7_0823300	Histone acetyltransferase GCN5 OS=Plasmodium falciparum (isolate 3D7) OX=36329 GN=PF3D7_0823300 PE=1 SV=2	220.1	0	9	tr|Q8IB67|Q8IB67_PLAF7	2.69473e+06	2.33869e+06	2.31349e+06	2.39102e+06	2.53318e+06	2.22819e+06	2.33869e+06	2.39102e+06	0.0870604	0.0640122	0.0319215	0	0	0.761829
sp|Q8IBZ9|CRT_PLAF7	Q8IBZ9	CG10	Putative chloroquine resistance transporter OS=Plasmodium falciparum (isolate 3D7) OX=36329 GN=CG10 PE=3 SV=1	346.59	0	8	sp|Q8IBZ9|CRT_PLAF7	2.18038e+07	1.20644e+07	1.18395e+07	1.43487e+07	1.32748e+07	1.3834e+07	1.20644e+07	1.3834e+07	0.373399	0.0388666	0.197463	0	0	0.762026
tr|Q8IKN7|Q8IKN7_PLAF7	Q8IKN7	PF3D7_1459400	Uncharacterized protein OS=Plasmodium falciparum (isolate 3D7) OX=36329 GN=PF3D7_1459400 PE=4 SV=1	425.26	0	13	tr|Q8IKN7|Q8IKN7_PLAF7	1.90076e+07	1.37945e+07	1.21585e+07	2.22474e+07	1.38381e+07	1.24154e+07	1.37945e+07	1.38381e+07	0.238666	0.328673	0.00455374	0	0	0.763423
tr|Q8ILM5|Q8ILM5_PLAF7	Q8ILM5	PF3D7_1422800	Actin-related protein, putative OS=Plasmodium falciparum (isolate 3D7) OX=36329 GN=PF3D7_1422800 PE=3 SV=1	206.48	0	4	tr|Q8ILM5|Q8ILM5_PLAF7	460186	232636	269207	251345	319465	300535	269207	300535	0.381052	0.121062	0.158817	0	0	0.7651
tr|O97245|O97245_PLAF7	O97245	PF3D7_0306400	Glycerol-3-phosphate dehydrogenase OS=Plasmodium falciparum (isolate 3D7) OX=36329 GN=PF3D7_0306400 PE=3 SV=1	192.86	0	4	tr|O97245|O97245_PLAF7	2.34902e+06	1.54326e+06	1.3042e+06	1.8168e+06	1.44991e+06	1.53757e+06	1.54326e+06	1.53757e+06	0.316036	0.119641	-0.00532138	0	0	0.765369
tr|Q8I1U8|Q8I1U8_PLAF7	Q8I1U8	PF3D7_0413900	Ubiquitin carboxyl-terminal hydrolase OS=Plasmodium falciparum (isolate 3D7) OX=36329 GN=PF3D7_0413900 PE=3 SV=1	343.82	0	14	tr|Q8I1U8|Q8I1U8_PLAF7	4.79142e+06	5.40986e+06	5.4052e+06	4.65962e+06	4.91097e+06	5.65317e+06	5.4052e+06	4.91097e+06	0.0683791	0.101799	-0.138342	0.0714286	0.0714286	0.767015
tr|C6KSR6|C6KSR6_PLAF7	C6KSR6	PF3D7_0606800	Uncharacterized protein OS=Plasmodium falciparum (isolate 3D7) OX=36329 GN=PF3D7_0606800 PE=1 SV=1	240.34	0	7	tr|C6KSR6|C6KSR6_PLAF7	4.67514e+06	2.95362e+06	2.63721e+06	3.30055e+06	3.15041e+06	3.02632e+06	2.95362e+06	3.15041e+06	0.320494	0.0434688	0.0930515	0	0	0.767158
tr|Q8IC33|Q8IC33_PLAF7	Q8IC33	PF3D7_0703700	Uncharacterized protein OS=Plasmodium falciparum (isolate 3D7) OX=36329 GN=PF3D7_0703700 PE=4 SV=1	87.92	0	4	tr|Q8IC33|Q8IC33_PLAF7	6.07066e+06	1.14903e+07	1.10417e+07	1.04708e+07	9.85705e+06	8.85086e+06	1.10417e+07	9.85705e+06	0.315485	0.0840871	-0.163737	0.0833333	0	0.767247
tr|Q8IJV1|Q8IJV1_PLAF7	Q8IJV1	PF3D7_1009400	Zinc finger protein, putative OS=Plasmodium falciparum (isolate 3D7) OX=36329 GN=PF3D7_1009400 PE=4 SV=1	33.26	0.00747791	1	tr|Q8IJV1|Q8IJV1_PLAF7	146307	24603.6	97098.1	121592	72035.4	61869.2	97098.1	72035.4	0.685297	0.375188	-0.430738	0.333333	0	0.767395
tr|Q8IBT2|Q8IBT2_PLAF7	Q8IBT2	PF3D7_0716800	Eukaryotic translation initiation factor 3 subunit I OS=Plasmodium falciparum (isolate 3D7) OX=36329 GN=PF3D7_0716800 PE=3 SV=1	1355.73	0	20	tr|Q8IBT2|Q8IBT2_PLAF7	9.53518e+07	7.29311e+07	7.75514e+07	7.77761e+07	7.95151e+07	8.00776e+07	7.75514e+07	7.95151e+07	0.144468	0.0151642	0.0360765	0.0430108	0.0537634	0.768008
tr|C6KT67|C6KT67_PLAF7	C6KT67	PF3D7_0623100	Nuclear polyadenylated RNA-binding protein NAB2,putative OS=Plasmodium falciparum (isolate 3D7) OX=36329 GN=PF3D7_0623100 PE=4 SV=1	372.83	0	9	tr|C6KT67|C6KT67_PLAF7	6.73882e+06	1.22536e+07	9.1869e+06	8.01342e+06	1.08578e+07	1.0207e+07	9.1869e+06	1.0207e+07	0.294171	0.153753	0.151915	0	0	0.769607
tr|O96217|O96217_PLAF7	O96217	PF3D7_0213700	Uncharacterized protein OS=Plasmodium falciparum (isolate 3D7) OX=36329 GN=PF3D7_0213700 PE=4 SV=1	129.96	0	6	tr|O96217|O96217_PLAF7	1.34218e+07	1.2732e+07	9.1181e+06	1.43409e+07	1.23647e+07	1.00259e+07	1.2732e+07	1.23647e+07	0.1966	0.176417	-0.0422302	0	0	0.771043
tr|Q8I272|Q8I272_PLAF7	Q8I272	PF3D7_0107000.1	Centrin-1 OS=Plasmodium falciparum (isolate 3D7) OX=36329 GN=PF3D7_0107000.1 PE=4 SV=1	110.7	0	3	tr|Q8I272|Q8I272_PLAF7	4.01813e+06	7.64683e+06	6.40974e+06	5.02794e+06	7.02178e+06	4.66538e+06	6.40974e+06	5.02794e+06	0.30618	0.227727	-0.350299	0	0	0.772407
tr|Q8IIY1|Q8IIY1_PLAF7	Q8IIY1	PF3D7_1101700	Pfmc-2TM Maurer's cleft two transmembrane protein OS=Plasmodium falciparum (isolate 3D7) OX=36329 GN=PF3D7_1101700 PE=4 SV=1	127.68	0	1	tr|Q8IIY1|Q8IIY1_PLAF7	5.41088e+07	3.21713e+07	2.95022e+07	4.85434e+07	2.94336e+07	2.9605e+07	3.21713e+07	2.9605e+07	0.349853	0.306295	-0.119931	0	0	0.772778
tr|Q8IKY0|Q8IKY0_PLAF7	Q8IKY0	PF3D7_1449500	Transcription factor with AP2 domain(S),putative OS=Plasmodium falciparum (isolate 3D7) OX=36329 GN=PF3D7_1449500 PE=4 SV=1	286.41	0	9	tr|Q8IKY0|Q8IKY0_PLAF7	2.64144e+06	2.77246e+06	2.04939e+06	2.27703e+06	2.55834e+06	2.34615e+06	2.64144e+06	2.34615e+06	0.154859	0.0612374	-0.171033	0	0	0.772932
tr|C0H4M6|C0H4M6_PLAF7	C0H4M6	PF3D7_0711500	Regulator of chromosome condensation, putative OS=Plasmodium falciparum (isolate 3D7) OX=36329 GN=PF3D7_0711500 PE=4 SV=2	560.36	0	16	tr|C0H4M6|C0H4M6_PLAF7	2.1313e+07	1.72813e+07	1.67147e+07	1.95632e+07	1.87671e+07	1.51921e+07	1.72813e+07	1.87671e+07	0.136	0.130495	0.118991	0	0	0.773526
tr|Q8IIS9|Q8IIS9_PLAF7	Q8IIS9	PF3D7_1107300	Polyadenylate-binding protein-interacting protein 1, putative OS=Plasmodium falciparum (isolate 3D7) OX=36329 GN=PF3D7_1107300 PE=4 SV=1	2050.76	0	60	tr|Q8IIS9|Q8IIS9_PLAF7	4.70515e+07	5.80957e+07	4.95307e+07	4.62105e+07	5.83771e+07	5.4924e+07	4.95307e+07	5.4924e+07	0.112392	0.117922	0.149113	0.0289855	0.0241546	0.773659
tr|A0A143ZYX3|A0A143ZYX3_PLAF7	A0A143ZYX3	PF3D7_0210100.1	60S ribosomal protein L37ae, putative OS=Plasmodium falciparum (isolate 3D7) OX=36329 GN=PF3D7_0210100.1 PE=3 SV=1	283.68	0	6	tr|A0A143ZYX3|A0A143ZYX3_PLAF7	5.08719e+07	4.28243e+07	4.23439e+07	4.70104e+07	4.16463e+07	4.36415e+07	4.28243e+07	4.36415e+07	0.105653	0.0614795	0.0272686	0.0416667	0	0.774038
tr|O96142|O96142_PLAF7	O96142	PF3D7_0204500	Aspartate aminotransferase OS=Plasmodium falciparum (isolate 3D7) OX=36329 GN=PF3D7_0204500 PE=1 SV=1	207.84	0	8	tr|O96142|O96142_PLAF7	1.03005e+07	7.55843e+06	7.51269e+06	8.08005e+06	7.89862e+06	8.32473e+06	7.55843e+06	8.08005e+06	0.188776	0.0263962	0.0962763	0.0416667	0.125	0.77419
tr|O97319|O97319_PLAF7	O97319	PF3D7_0319600	Elongation factor 1 (EF-1), putative OS=Plasmodium falciparum (isolate 3D7) OX=36329 GN=PF3D7_0319600 PE=4 SV=2	295.9	0	7	tr|O97319|O97319_PLAF7	3.07644e+07	5.81098e+07	6.00316e+07	4.9297e+07	4.69599e+07	3.88508e+07	5.81098e+07	4.69599e+07	0.329824	0.121734	-0.307354	0	0	0.774916
tr|Q8ILJ1|Q8ILJ1_PLAF7	Q8ILJ1	PF3D7_1427300	Uncharacterized protein OS=Plasmodium falciparum (isolate 3D7) OX=36329 GN=PF3D7_1427300 PE=4 SV=1	189.48	0	6	tr|Q8ILJ1|Q8ILJ1_PLAF7	2.59271e+06	2.26094e+06	2.16126e+06	2.08579e+06	2.2406e+06	2.50291e+06	2.26094e+06	2.2406e+06	0.0966047	0.0926263	-0.0130392	0	0	0.775013
tr|Q8IE45|Q8IE45_PLAF7	Q8IE45	PF3D7_1328500	Alpha/beta-hydrolase, putative OS=Plasmodium falciparum (isolate 3D7) OX=36329 GN=PF3D7_1328500 PE=4 SV=1	74.07	0.000865801	3	tr|Q8IE45|Q8IE45_PLAF7	283218	257673	224483	259552	244897	279306	257673	259552	0.115434	0.0660946	0.0104791	0	0	0.775219
tr|Q8I665|Q8I665_PLAF7	Q8I665	PF3D7_0204200	Uncharacterized protein OS=Plasmodium falciparum (isolate 3D7) OX=36329 GN=PF3D7_0204200 PE=4 SV=1	80.16	0	4	tr|Q8I665|Q8I665_PLAF7	6.55453e+06	4.45355e+06	4.43732e+06	5.34735e+06	5.0827e+06	4.21843e+06	4.45355e+06	5.0827e+06	0.236519	0.120915	0.190637	0	0	0.77532
tr|C6KSV1|C6KSV1_PLAF7	C6KSV1	PF3D7_0610500	Peptidyl-tRNA hydrolase PTRHD1, putative OS=Plasmodium falciparum (isolate 3D7) OX=36329 GN=PF3D7_0610500 PE=4 SV=1	323.45	0	4	tr|C6KSV1|C6KSV1_PLAF7	2.84427e+06	1.41458e+06	1.71521e+06	1.87945e+06	1.65744e+06	1.87897e+06	1.71521e+06	1.87897e+06	0.378529	0.0709253	0.131554	0	0	0.775344
tr|Q8I3L1|Q8I3L1_PLAF7	Q8I3L1	PF3D7_0525400	G-protein coupled receptor, putative OS=Plasmodium falciparum (isolate 3D7) OX=36329 GN=PF3D7_0525400 PE=4 SV=1	38.03	0.00423729	1	tr|Q8I3L1|Q8I3L1_PLAF7	17240.6	73466.8	96782.3	44574.4	54404.9	76073.6	73466.8	54404.9	0.654273	0.276192	-0.433356	0	0	0.775544
tr|Q8IIH4|Q8IIH4_PLAF7	Q8IIH4	PF3D7_1119300	Splicing factor U2AF small subunit, putative OS=Plasmodium falciparum (isolate 3D7) OX=36329 GN=PF3D7_1119300 PE=4 SV=1	153.7	0	2	tr|Q8IIH4|Q8IIH4_PLAF7	6.96521e+06	5.39665e+06	6.02831e+06	5.59666e+06	5.63123e+06	6.58798e+06	6.02831e+06	5.63123e+06	0.128745	0.0947401	-0.0983019	0	0	0.775763
tr|Q8IEG8|Q8IEG8_PLAF7	Q8IEG8	PF3D7_1314700	Pinin_SDK_memA domain-containing protein OS=Plasmodium falciparum (isolate 3D7) OX=36329 GN=PF3D7_1314700 PE=4 SV=1	87.9	0	3	tr|Q8IEG8|Q8IEG8_PLAF7	201056	264302	214711	224453	242684	190068	214711	224453	0.146812	0.121962	0.064015	0.111111	0.111111	0.77737
tr|C6KSQ9|C6KSQ9_PLAF7	C6KSQ9	PF3D7_0606100	RNA-binding protein, putative OS=Plasmodium falciparum (isolate 3D7) OX=36329 GN=PF3D7_0606100 PE=4 SV=1	40.75	0.00359712	1	tr|C6KSQ9|C6KSQ9_PLAF7	178261	138642	153852	179606	136741	140277	153852	140277	0.127369	0.156317	-0.133257	0	0	0.779202
tr|Q8IJA4|Q8IJA4_PLAF7	Q8IJA4	PF3D7_1030100	Pre-mRNA-splicing factor ATP-dependent RNA helicase PRP22, putative OS=Plasmodium falciparum (isolate 3D7) OX=36329 GN=PF3D7_1030100 PE=4 SV=1	50.9	0.000775194	1	tr|Q8IJA4|Q8IJA4_PLAF7	191360	210857	179900	235794	208378	127248	191360	208378	0.0806599	0.296337	0.122914	0	0	0.779519
[truncated: 309 more rows]

## Sheet: trophozoite G2
proteinName	ac	geneName	proteinDescription	idScore	idQValue	nbPeptides	allAccessions	DMSO_rep1	DMSO_rep2	DMSO_rep3	rapa_rep1	rapa_rep2	rapa_rep3	medianInt_DMSO_T2	medianInt_rapa_T2	cv_DMSO_T2	cv_rapa_T2	log2ratio_rapa_T2	fracNAFeatures.DMSO_T2	fracNAFeatures.rapa_T2	FTestPValue
[truncated: 1,155 more rows]
