# Supplementary material for: Genetic validation of PfFKBP35 as an antimalarial drug target
Source: bioRxiv preprint, doi:10.1101/2022.12.09.519720, version 4 (2023-08-19)
Supplement: Oligonucleotides used in this study [file 519720_file05.xlsx]

## Sheet: Sheet1
name	sequence (5'-3')
PCRa_F	CTGGCGTAATAGCGAAGAGG
PCRa_R	CATTAATGAATCGGCCAACG
PCRb_F	CGTTGGCCGATTCATTAATGGAAGCATTAAGATTATATATTGTAGTTGTG
PCRb_R	GTTAATTCCACTTTTTCAAATTCTTGTTCGG
PCRc_F	TCATTTCTTATAAGAAAAAATAAAGAACCACC
PCRc_R	CCTCTTCGCTATTACGCCAGAATAATTATACCAATAAATGCAACAC
PCRd_F	CGTATAGCATACATTATACGAAGTTATTATATATGTATATATATATATATTTATATATTTTATATTCTTTTAGCTTCCAATTCAATGAGTAAAGGAGAAGAACTTTTCAC
PCRd_R	TGGTTCTTTATTTTTTCTTATAAGAAATGATTATTTGTATAGTTCATCCATGCCATG
PCRe_F	GAAAAATAGCGCCAACTAATATTTAATAATAGATTAAAAATATTATAAAAATAAAAACATAAACAC
PCRe_R	CTTCGTATAATGTATGCTATACGAAGTTATTTTAATAAATATGTTCTTATATATAATGAGAAATAAATATTTAAC
PCRf_F	CAAGAATTTGAAAAAGTGGAATTAACAG
PCRf_R	ATTAGTTGGCGCTATTTTTCTTTTCTTC
PCRg_F	CGTTGGCCGATTCATTAATGGAAGCATTAAGATTATATATTGTAGTTGTG
PCRg_R	GTTTCCACCTGCACTCCCATATTATAAATAAATAGAAAAAAAAATGATAAATGG
PCRh_F	GAGCAGGAGTTCGAGAAGGTAGAGCTTACAGCAGATGGAGGAGTTATCAAAACTATATTAAAAAAAGGTG
PCRh_R	CCTCTTCGCTATTACGCCAGCAAAGTACATATTAGCAACACCTA
PCRi_F	GAGCTTCTAAAACTGGAAACCGGTTCTAGTATGAGTAAAGGAGAAGAACTTTTCAC
PCRi_R	CTTCTCGAACTCCTGCTCTGTTGTCATACCGGAACTACCTTTGTATAGTTCATCCATGCCATG
PCRj_F	ATGGGAGTGCAGGTGGAAAC
PCRj_R	TTCTTCTCCTTTACTCATACTAGAACCGGTTTCCAGTTTTAGAAGCTCCACAC
PCRk_F	TTTTATTATCATATATATAATTCAAAAGCTAGCATGACTACCGAACAAGAATTTG
PCRk_R	CATTCCACTGGATCCATTTGCACTATTTTTTTTTTCTTCA
PCRl_F	AAATGGATCCAGTGGAATGAGTAAAGG
PCRl_R	TTTTATTCTGCATATTTAAAAATCCTGCAGTCATTCCAGTTTTAGAAGCTCCAC
gRNA_top _P230p	TATTAGGCTGATGAAGACATCGGG
gRNA_bottom_P230p	AAACCCCGATGTCTTCATCAGCCT
gRNA_top_FKBP-3’	TATTAAAGATAAACTAACTTTTGG
gRNA_bottom_FKBP-3’	AAACCCAAAAGTTAGTTTATCTTT
gRNA_top_FKBP_5'	TATTGTGGAATTAACGGCTGACGG
gRNA_bottom_FKBP_5'	AAACCCGTCAGCCGTTAATTCCAC
F1	CGTTAAGAAGTATCTATATATCAAAATTATGC
R1	GTGTGAGTTATAGTTGTATTCC
F2	GGTTATGTACAGGAAAGAAC
R2	CGTGTGTATATGATTTATTTATACC
F3	CGTTAAGAAGTATCTATATATCAAAATTATGC
R3	GCTTTGTAAAGATTTTCTTTTGC
F4	GAAATGAGTTGAAAATTCCCCTAC
R4	ACCATCAACATTATCGTCAG
F_wt	TCTTCATCAGCCTGGTAAC
