# Supplementary material for: Genetic validation of PfFKBP35 as an antimalarial drug target
Source: bioRxiv preprint, doi:10.1101/2022.12.09.519720, version 4 (2023-08-19)
Supplement: RNA-seq data comparing the transcriptomes of FKBP35 KO and FKBP35 WT parasites [file 519720_file03.xlsx]

## Sheet: Legend
TPMs
Column name	Content
GeneID	PlasmoDB gene id
Description	Gene product description
Name	Gene name
1A.D to 7C.R	Transcripts Per Million (TPMs), Time 1-7, replicate A-C, D: DMSO, R: Rapamycin
Paired_deseq2_tests
Column name	Content
GeneID	PlasmoDB gene id
Description	Gene product description
Name	Gene name
fdr.1	DeSeq2 False discovery rate, Time 1 DMSO vs Rapamycin
av.log2FoldChange.1	average TPMs log2(Rapamycin/DMSO), Time 1
fdr.2	DeSeq2 False discovery rate, Time 2 DMSO vs Rapamycin
av.log2FoldChange.2	average TPMs log2(Rapamycin/DMSO), Time 2
fdr.3	DeSeq2 False discovery rate, Time 3 DMSO vs Rapamycin
av.log2FoldChange.3	average TPMs log2(Rapamycin/DMSO), Time 3
fdr.4	DeSeq2 False discovery rate, Time 4 DMSO vs Rapamycin
av.log2FoldChange.4	average TPMs log2(Rapamycin/DMSO), Time 4
fdr.5	DeSeq2 False discovery rate, Time 5 DMSO vs Rapamycin
av.log2FoldChange.5	average TPMs log2(Rapamycin/DMSO), Time 5
fdr.6	DeSeq2 False discovery rate, Time 6 DMSO vs Rapamycin
av.log2FoldChange.6	average TPMs log2(Rapamycin/DMSO), Time 6
fdr.7	DeSeq2 False discovery rate, Time 7 DMSO vs Rapamycin
av.log2FoldChange.7	average TPMs log2(Rapamycin/DMSO), Time 7

## Sheet: TPMs
GeneID	Description	Name	1A.D	1A.R	1B.D	1B.R	1C.D	1C.R	2A.R	2A.D	2B.D	2B.R	2C.D	2C.R	3A.D	3A.R	3B.D	3B.R	3C.D	3C.R	4A.D	4A.R	4B.D	4B.R	4C.D	4C.R	5A.D	5A.R	5B.D	5B.R	5C.D	5C.R	6A.D	6A.R	6B.D	6B.R	6C.D	6C.R	7A.D	7A.R	7B.D	7B.R	7C.D	7C.R
GFP	NA	NA	77.3444	662.956	102.748	830.26	148.128	1085.44	2194.73	71.3806	71.1343	3477.74	21.9258	2477.16	52.0382	1143.53	28.6447	915.409	32.7048	1478.75	64.2181	615.873	21.4853	265.088	13.6631	652.798	37.8167	977.471	75.2162	851.342	105.186	1232.57	106.023	2021.72	105.248	2076.7	12.8974	2175.27	24.4029	3896.44	12.435	3774.86	9.40451	2678.16
PF3D7_0100100	erythrocyte membrane protein 1, PfEMP1	VAR	1.67948	2.14627	2.23186	0.849046	0.729047	0.291589	9.79041	13.3083	6.82033	3.33385	2.79733	1.40095	19.7677	36.4397	9.22351	4.93412	41.6088	38.7495	2.05308	0.560598	0.68891	1.09576	1.10415	0.899967	0.544776	0.75327	1.05302	0.983332	3.4746	4.17179	9.11206	6.49879	8.01887	4.41971	0.690633	7.87276	0.60339	0.650301	0.996794	0.473859	1.93477	6.37229
PF3D7_0100200	rifin	RIF	2.83112	2.47732	1.63915	1.61412	10.0742	15.9175	11.1676	12.4648	6.75272	13.2669	13.3347	20.0024	0.715819	1.24681	0.871297	6.30607	0.61152	1.89193	0.486624	0.812004	0.33262	0.892778	5.99744	2.82439	10.4554	4.52224	9.4566	5.79901	33.6284	19.8	53.2119	59.8186	65.4443	52.9637	38.8263	43.9258	8.91466	17.4847	6.20841	18.2511	10.0888	16.9752
PF3D7_0100300	erythrocyte membrane protein 1, PfEMP1	VAR	0.235927	0.218587	0.204893	0.172942	0.285119	0.237574	0.0664736	0.127192	0	0.11437	0.0680343	0.0543542	0.0596516	0.155851	0	0.157652	0.0764399	0.157661	0.30414	0.101501	0.249465	0	0.239898	0.0543153	0.246589	0.129207	0.26692	0.228908	0.400338	0.264	0.134373	0.0715534	0.219612	0.357863	0	0.256576	0	0.13246	0.144382	0	0	0.0451468
PF3D7_0100400	rifin	RIF	43.8467	52.4015	49.7874	69.9879	188.642	206.174	360.208	240.007	162.282	345.096	323.611	500.246	23.3617	19.9756	20.4222	74.371	20.1392	33.539	2.38224	2.52962	5.92116	5.36385	178.509	96.3032	245.12	161.696	303.017	163.677	806.126	578.994	1438.59	1248.54	1697.87	1285.57	1354.79	1070.07	295.22	560.967	196.365	665.793	175.58	312.473
PF3D7_0100600	rifin	RIF	0.522184	0.13439	1.13374	0.212655	0.701181	0.219096	0.980854	0.938392	0.518959	0.843794	0.250971	0.200507	0	0	0	0.29078	0	0.290796	0.448775	0	0	0	0	0.400726	0.363856	0.238315	1.26596	0.140736	3.16457	2.9216	5.20473	4.48719	3.84809	3.63032	1.03787	2.65015	0	0	0	0	0	0.333083
PF3D7_0100800	rifin	RIF	0.363259	0	0	0	0.731667	0.91449	0.767625	0.244798	0.541522	0	0	0.209224	0	0	0	0.303422	0	0.303439	0	0	0	0	0.461716	0	0.189838	0	0.587114	0	0.660433	1.52431	2.06896	1.37714	1.05668	1.20532	0.270748	1.97526	1.26158	0.509874	0	0.810617	0.383236	0.868913
PF3D7_0100900	rifin	RIF	0.535573	0.413509	0.193802	0	1.25853	0.674143	2.76651	2.40613	0.532265	1.94722	1.02963	2.26213	0	0	0	0	0.578417	0.745631	0.230141	0	0	0	0	0	1.11956	0.122213	0.144269	0.866069	3.24572	1.99768	4.82979	2.7072	7.06261	3.04642	1.3306	5.63035	0	0.751737	0.682831	1.59352	0.125562	1.70812
PF3D7_0101000	rifin	RIF	0	0.134765	0.189483	0	0.351567	0	0.983586	0.470503	0	0.211536	0.25167	0.804261	0.441322	0.576518	0	0	0.282764	0.145803	0.900051	0	0.307604	0	0.221855	0.401842	0.36487	0.238979	0.423163	0.705641	1.90403	0.244145	1.98828	2.38219	2.23404	1.32379	1.82133	1.32876	0.242476	0	0.133523	1.55801	0.122764	1.50305
PF3D7_0101100	exported protein family 4	EPF4	0.606407	1.09246	0.219434	0	0.610706	0	0	0.272436	0.301331	1.46984	0.29145	0	0	0.333822	0.622088	0	0.327459	0	1.3029	0.434815	0.71245	0.239034	0	0	0	0.276753	0.49005	0	0.734998	1.41368	1.15128	1.53263	0.940788	7.6652	0	1.09914	0	0	0.154628	0	0.142168	0
PF3D7_0101300	Pfmc-2TM Maurer's cleft two transmembrane protein	MC-2TM	55.4931	62.1157	69.1775	92.1263	183.971	226.932	456.721	346.41	389.087	522.259	379.392	583.271	11.4127	7.01593	14.3001	40.8077	12.9041	12.4204	2.05372	1.71347	3.50942	3.45384	54.6722	56.8488	188.989	90.3376	192.684	102.189	396.162	341.679	996.208	791.589	1048.87	788.63	1232.91	692.15	479.507	798.66	260.391	908.509	171.246	317.558
PF3D7_0101600	rifin	RIF	1.69357	0.78455	0.919251	1.03454	2.72892	6.8216	5.2489	4.10864	2.52466	6.56791	4.1512	4.29193	0.856404	0.279689	0	0.848762	0.823072	0.424405	0.436646	0.546457	0	0	2.36785	0.194948	1.94712	1.27531	0.821166	1.09546	8.00551	5.92217	16.1568	14.3818	20.0998	13.6472	15.1473	14.9186	2.82321	7.60677	2.97973	6.29871	3.4543	4.69917
PF3D7_0101900	rifin	RIF	0	0.140641	0.593237	0.667636	0.550345	0	0	0	0	0	0	0	0	0	0	0	0	0.152161	0.939297	0.783679	0	0	0.231529	0	0.19039	0.374099	0.58882	0	0.220784	0.254791	0.518744	0.552459	0	0.690759	0	0.198101	0	0	0	0	0	0
PF3D7_0102000	NA	NA	0	0.27646	0	0	0.721215	0	0	0.965204	0	0.433951	0.516284	0.412471	0	0	0	0	0	0	0.461597	0	0	0.423432	0	0.412175	1.12276	0	0.289363	0	1.73599	0	0	0.542988	0.83327	0.339459	0	0	0.994846	0	0.547825	2.66346	0	0.3426
PF3D7_0102100	NA	NA	1.11103	1.20094	2.171	1.0859	1.56647	0.839093	2.50431	3.59384	3.64375	0.269296	1.60194	0.255966	0.561825	0.733936	0.341928	0.742416	0	0.928073	1.43226	2.15095	2.15377	0.525536	0.847298	1.5347	0.696746	0.608464	0.897846	1.25764	1.88528	3.10809	1.58198	1.6848	2.84405	2.52788	1.65617	1.93324	2.46948	4.05458	0.339963	0.661142	1.09399	2.76388
PF3D7_0102200	ring-infected erythrocyte surface antigen	RESA	173.561	166.436	165.176	117.935	127.898	125.648	36.5788	33.8288	20.1276	20.349	12.812	12.1633	39.9004	56.6976	77.423	1009.6	456.244	497.213	1620.28	2188.33	1732	1819.7	1077.13	1563.96	204.383	298.974	192.063	306.229	135.395	227.594	38.3679	47.5114	34.5757	54.5369	39.1351	37.2108	18.035	26.4832	13.9037	27.3826	45.4519	15.5132
PF3D7_0102300	NA	NA	1.5931	0.410005	1.72944	1.29755	4.27839	4.01058	278.297	272.69	482.896	480.105	614.837	696.132	580.703	290.284	637.376	118.875	425.835	363.742	0.684573	3.42693	0	0.627971	1.34993	1.22255	3.33021	1.45413	3.00398	2.57619	50.2041	36.3962	145.934	57.9801	134.7	85.5839	561.241	221.765	1122.05	544.863	467.973	513.505	462.01	322.131
PF3D7_0102400	NA	NA	0	0.244346	0	0	0	0	1.33753	2.13271	0.943561	1.91771	4.56311	5.83292	5.20114	2.09061	3.8959	0	7.69032	3.9654	0	0	0.278863	0	0	0.364296	0	0	0	0	0.383585	0	0	0	0.736476	0.600053	1.41528	0.68835	0	0	1.69466	0.470813	0.890346	3.02803
PF3D7_0102500	erythrocyte binding antigen-181	EBA181	4.91546	6.35612	4.55521	2.29472	2.61601	4.12483	1.68897	1.72358	1.78723	0.920209	1.67101	0.78259	17.6824	16.5655	28.2875	11.3493	173.827	169.982	6.90336	3.6535	4.82426	5.10387	2.89529	3.86414	1.25308	1.39524	1.16262	2.06796	0.871872	1.17386	1.25187	1.63624	1.30198	1.25024	0.357429	0.956139	0.111032	0.392648	0.764265	0.297261	6.6333	0.726495
PF3D7_0102600	serine/threonine protein kinase, FIKK family	FIKK1	42.9002	38.4898	44.631	47.1952	53.8053	49.8748	13.2905	11.5105	7.25391	10.8316	10.882	17.2735	1.00434	1.80402	1.06968	18.7463	1.9305	2.65449	2.94442	2.99065	1.75007	3.40557	30.167	26.9776	69.4383	57.173	69.3371	49.7818	92.56	78.4804	152.854	169.867	130.223	166.918	87.3388	78.9464	8.4152	46.2765	11.4709	30.5812	7.75278	32.0203
PF3D7_0102700	merozoite-associated tryptophan-rich antigen	MaTrA	2.7146	1.39727	1.96461	2.48737	0.455641	1.13899	8.28592	6.09786	6.40736	6.57977	3.91406	7.81759	1.42992	3.36233	1.7405	4.15699	5.49705	6.42481	6.41571	6.32601	4.78396	8.29285	2.30024	4.68719	0.472882	0.929171	1.46248	1.64616	1.64512	1.26568	4.50951	1.71521	2.10574	2.35905	6.74427	3.19822	6.28513	5.08033	4.67234	6.73076	3.50031	1.73155
PF3D7_0102800	NA	NA	0.309188	0.0795733	0.335647	0	0.415173	0.778369	7.55	7.63987	10.2938	10.2421	9.80769	10.4475	12.2474	9.1911	12.8459	4.64865	11.6873	9.90046	0.265722	0.221699	0.0908139	0.243752	0	0.237272	0.215441	0.423323	0.58301	0.499984	1.12426	1.7299	3.2285	1.40659	2.15855	1.36788	3.68716	8.63041	4.00884	6.22038	3.39012	5.97963	3.04446	12.129
PF3D7_0102900	NA	NA	104.537	110.727	108.275	94.6262	91.6903	101.518	180.918	177.935	224.965	244.054	215.571	257.762	151.865	118.009	146.558	100.173	145.226	135.492	122.264	127.913	99.7742	103.764	97.8108	110.784	100.696	98.2451	86.0128	106.017	164.134	160.618	172.471	164.585	190.941	178.69	157.021	217.591	72.4714	140.697	141.893	150.462	124.976	194.017
PF3D7_0103000	NA	NA	1.68706	0.930396	0.261633	0	0.728149	0	15.9577	15.9166	15.0897	11.3912	17.3749	11.3826	32.2963	30.2494	32.2648	9.66283	32.7963	35.2311	0	0	0.42473	0.855007	0	0.277426	0.251901	0.494962	0.584291	0	0.584229	2.35976	4.11803	1.09642	3.36513	1.14241	5.74819	4.19364	4.68726	3.38282	11.4306	8.60501	17.6288	14.0664
PF3D7_0103100	vacuolar protein sorting-associated protein 51, putative	VPS51	0.114976	0.0887717	0.374447	0.140469	0.154388	0.289449	1.88972	2.01453	1.54259	1.95079	2.70773	3.57601	5.47496	4.36725	7.78466	1.34452	5.96035	4.64207	0.0988129	0.247326	0.0675411	0.0906429	0	0.220583	0.200288	0.419784	0.464574	0.433829	0.696787	0.428859	1.25514	1.10424	1.42701	1.12634	1.77104	1.2504	1.06482	1.72141	1.28999	1.93854	1.40168	2.64022
PF3D7_0103200	nucleoside transporter 4	NT4	22.4719	33.5884	27.2098	22.8787	28.7242	28.4674	111.817	115.908	105.438	133.901	114.443	137.727	104.53	91.3522	114.6	38.2626	87.0438	78.6955	16.8987	30.3671	13.5816	19.5898	20.8727	14.0945	17.4651	14.4961	17.8108	14.2095	52.2045	44.3278	71.7894	66.8437	92.6893	67.1894	105.218	94.7787	91.8517	95.6365	66.2271	89.7922	83.2811	92.0688
PF3D7_0103300	NA	NA	23.5239	27.6912	30.1262	10.996	19.7078	17.2512	38.2309	41.8141	40.1501	36.6899	24.185	18.8507	35.428	43.8038	26.2306	21.0728	37.8876	32.8071	29.4463	19.5809	21.0886	18.5453	19.0665	22.6831	17.3178	23.7122	19.8366	20.9496	35.8675	34.239	31.1653	34.3282	35.7018	36.0052	19.5151	46.6423	7.76716	24.5006	10.9535	30.3298	19.0867	40.1874
PF3D7_0103400	NA	NA	14.1096	16.0572	14.5617	6.13956	11.4845	8.4665	86.2075	82.2671	65.0027	68.0709	50.7206	33.3526	68.7104	82.6731	63.2315	34.7429	77.2144	68.3595	9.56797	5.90394	8.78805	7.40549	9.1389	10.5014	9.25241	12.4112	12.9955	10.7831	34.0157	29.3602	56.4186	41.6788	55.0094	43.2805	55.2612	61.126	30.9854	57.0258	31.3749	68.1473	53.5336	91.5414
PF3D7_0103500	NA	NA	0.0343542	0.0795733	0.149177	0.0419713	0.138391	0.0864854	2.22628	2.36141	1.99731	2.95606	2.22902	0.870621	1.95438	2.21267	1.21587	0.573907	2.33745	1.69312	0.177148	0.221699	0.121085	0.243752	0.0873311	0.0395453	0.143628	0.0470359	0.0832871	0.0833306	0.749504	0.144158	0.782666	0.833534	1.27914	0.553668	1.07542	1.27028	0.811312	1.06084	0.76212	1.22659	0.749033	1.08471
PF3D7_0103600	ATP-dependent DNA/RNA helicase PSH1	PSH1	2.16358	3.46701	3.85546	0.249367	1.60335	1.13045	15.5275	16.0658	17.8305	11.8736	12.3605	4.79649	18.011	14.2924	11.307	4.84191	19.7073	14.8675	2.26288	0.131719	0.359706	0.48274	1.24528	2.49051	2.43203	1.3414	1.74843	2.31046	9.84626	7.76556	13.9503	13.6189	16.3872	14.5514	6.02437	17.0478	1.30432	7.9072	1.96735	12.2068	7.37885	21.4432
PF3D7_0103700	L-seryl-tRNA(Sec) kinase, putative	PSTK	3.15649	2.97865	3.04587	4.142	1.29509	3.82601	7.90539	6.61777	13.2451	9.49269	8.93382	2.82804	11.0845	6.56434	10.4339	3.906	7.57554	11.0351	7.08328	3.52071	4.73859	2.6267	3.86342	4.30631	3.05476	2.48097	3.779	3.4974	6.80147	4.25159	5.16034	6.55941	8.7058	7.09317	9.23625	9.66258	4.87215	4.43048	2.86177	6.60895	7.07127	9.39593
PF3D7_0103800	actin-related protein ARP1, putative	ARP1	1.64467	1.77776	0.357084	1.60747	0.331267	1.0351	3.47547	0.88667	1.71624	1.39525	5.92845	8.71494	25.1583	19.013	27.5858	9.06683	31.9724	31.7357	0.21202	0.884467	1.01445	1.55592	0.418089	0.757278	0.687603	0.450359	0.398729	0.398937	0.398686	0.230047	0.468367	0.498808	0.382735	0.311839	1.71616	0	4.79798	2.07764	7.42296	0	20.1274	5.50768
PF3D7_0103900	parasite-infected erythrocyte surface protein	PIESP15	5.65699	5.45961	5.90491	6.11382	3.06767	4.24499	23.2953	23.0199	41.1924	43.9037	43.92	55.014	52.9491	25.8712	49.2162	13.6303	50.5799	41.6202	4.06703	11.1157	4.02608	3.73076	3.87168	2.88022	2.61522	2.60657	1.40663	3.87024	10.2849	10.4995	15.1805	13.6925	17.5949	18.1516	28.5414	29.1043	25.8427	31.3028	18.5581	28.1605	25.7087	36.0146
PF3D7_0104000	thrombospondin-related sporozoite protein	TRSP	0.382086	0.590007	0	0	1.53918	0.480943	3.76792	2.57486	0.569589	1.85223	2.20365	0.440137	1.4491	4.41704	2.93974	1.27659	1.85693	3.83	0.492558	0	0.336676	1.80733	0.485646	0	0	0.523131	0	0.926799	0	0.534439	2.17619	2.89704	0	0.362227	1.70869	1.24658	0.530787	2.6815	2.33828	1.70526	2.95606	0.731158
PF3D7_0104100	NA	NA	0.712069	0.18326	0.858896	0.0966612	0	0.0995893	0.891686	1.06635	2.59479	1.82183	6.84467	4.92153	26.1057	19.0768	24.3494	7.00515	32.812	32.4502	0.203989	0.170193	0.278863	0	0	0	0	0.108325	0.0639376	0.063971	0	0.332	0.337969	0.119978	0.368238	0.150013	0.943517	0	1.97839	0	2.84461	0.235406	13.856	2.34672
PF3D7_0104200	NA	NA	9.52679	13.157	10.3421	14.262	17.8373	15.7074	51.7941	65.8281	66.4089	64.2332	90.7366	83.4658	99.0641	94.8427	140.816	55.1423	139.552	149.857	7.092	9.23633	9.34041	6.98164	10.9151	14.3644	16.6891	17.7282	19.8434	16.3821	21.7929	24.5865	52.1587	40.2881	48.087	39.6883	77.0067	46.1121	48.8369	55.1826	103.876	94.0194	120.797	71.1243
PF3D7_0104300	ubiquitin carboxyl-terminal hydrolase 1, putative	UBP1	51.2934	59.0934	54.4974	13.7363	33.248	27.9217	58.0862	58.057	64.4547	59.7117	45.4846	20.5617	64.4829	50.4711	50.1954	49.7383	89.7368	78.2009	81.9566	18.4473	44.8029	35.3566	50.6548	57.9725	33.3272	38.8767	33.2478	44.2378	62.8647	69.4674	61.743	64.0454	65.37	68.0954	50.0668	68.4971	15.4699	47.8968	20.2285	73.325	56.8908	72.8881
PF3D7_0104400	4-hydroxy-3-methylbut-2-enyl diphosphate reductase	LytB	7.94967	8.93596	6.34557	4.71331	12.7154	8.24064	67.0311	64.9171	76.8562	74.5247	82.5957	82.8213	98.2827	92.8662	95.1643	39.8412	84.0885	88.9641	2.71275	1.25739	2.26628	2.07371	4.75498	5.7866	10.9972	8.24321	13.7933	9.64148	18.9874	20.9309	40.4504	35.6336	46.7937	39.2341	60.9941	57.5941	89.3227	83.3587	76.0159	119.135	103.685	87.1361
PF3D7_0104500	NA	NA	68.5226	69.9604	73.1631	54.5252	67.1923	63.8375	119.714	125.164	115.59	100.8	96.8496	139.172	51.8617	74.4496	57.5767	61.7541	45.644	45.565	51.141	82.1848	50.8453	61.3063	42.9744	46.7033	51.8299	51.8464	54.0995	59.9597	71.5785	72.8299	95.322	85.794	95.4663	85.4752	97.4402	100.994	93.6247	121.173	74.8334	93.8916	67.2179	105.892
PF3D7_0104600	NA	NA	1.07554	1.29978	1.62447	0.628442	0.659319	1.17723	3.09628	3.21434	4.32207	3.00366	2.29245	1.29282	1.83264	1.93069	0.863495	0.624959	0.757554	1.36718	1.62765	0.855028	0.988923	0.387093	0.772685	0.592118	0.635391	0.768299	0.680219	0.567146	2.77727	2.09309	3.19608	1.98555	2.33968	2.52694	2.37006	4.88215	0.779543	1.37837	0.608127	3.20012	0.986689	3.84786
PF3D7_0104700	major facilitator superfamily-related transporter, putative	MFR2	0	0	0	0.215044	0.0886324	0	0.247969	0.474468	1.44317	0.853275	0.380687	0.709659	0.445041	0.145344	0.270853	0	0	0.220548	0	0	0	0	0	0	0	0.0602482	0.0711215	0	0	0.246202	0.125315	0.266918	0.102403	0.0834344	0.655956	0.382846	0.489039	0.864709	0.740565	0.916498	0.495192	0.421032
PF3D7_0104800	novel putative transporter 1, putative	NPT1	0.216824	0	0.11769	0.132449	0.10918	0	2.90184	2.92233	4.04034	4.86131	5.471	8.24228	7.40093	3.93887	11.344	1.99219	6.14694	5.70524	0.279514	0.349808	0	0.256403	0.413387	0.124794	0	0	0.35044	0	0.131401	0.454921	0.617467	0.493198	1.13529	0.924996	7.27226	2.12221	4.36751	9.28226	3.73194	2.58051	3.12622	3.00812
PF3D7_0105100	NA	NA	0.435153	0	0	0	0	1.64322	6.74337	10.5569	20.7584	8.96531	17.568	24.0608	37.4082	26.5899	29.4628	6.54254	31.0176	34.532	0	0.46803	0	0	0.553097	0	0	0	0	0	3.16457	0.608667	3.71766	2.63952	5.06327	3.30029	2.59467	7.57185	16.9262	7.32944	12.6494	9.06315	21.73	16.2378
PF3D7_0105200	NA	NA	6.05697	7.56744	7.65127	7.66902	14.6398	13.1689	44.0609	41.4113	59.922	56.856	54.9402	50.8702	28.5405	27.6445	33.7228	10.4865	25.5119	28.6094	4.25903	3.19807	3.49338	1.82321	6.43887	3.54949	4.48905	5.05111	12.0144	6.05487	22.4245	16.3281	37.1636	30.895	50.9993	33.6178	56.4717	45.7505	37.7875	62.2938	31.6757	78.6398	34.1578	53.0006
PF3D7_0105300	cyclase-associated protein	CAP	1.92215	4.4522	2.50397	4.227	2.32293	2.90336	15.1641	23.3159	30.3734	29.8175	58.2007	76.168	269.242	189.193	341.328	92.4786	477.045	385.671	2.97348	5.37517	4.0649	4.54605	2.44313	1.32756	0.401805	1.05268	0	0.310828	2.7957	3.76403	3.28432	2.33185	6.2623	2.9156	30.372	17.5593	53.4043	27.5191	49.111	18.873	183.589	37.15
PF3D7_0105400	NA	NA	2.22206	1.71562	0.482444	0	1.79025	1.67819	1.25215	1.19795	3.3125	2.15437	0.640777	3.58352	37.6423	28.6235	59.4954	10.3938	74.1543	92.8073	1.71871	0	0.391595	0.525536	0	0.511565	0.928995	0	0	0	1.0773	0.621617	1.89838	0	0	0.842628	0	0	1.85211	1.24756	1.35985	0	23.4426	2.12606
PF3D7_0105500	NA	NA	0	0.420701	0.197173	0.2219	0.731667	1.37173	3.32638	6.11995	3.51989	7.04385	5.49954	11.2981	8.49577	6.29908	4.47182	4.24791	4.41358	6.97911	0	0	0	0	0	0.209074	0	0.248677	0.587114	0.29371	0.660433	1.01621	1.55172	0.550857	2.3247	1.5497	5.95646	3.55548	2.27084	4.07899	8.33647	2.43185	3.70461	4.51835
PF3D7_0105600	NA	NA	6.39409	7.38544	6.66363	8.43674	9.27276	9.20742	10.1608	8.75577	13.0396	13.7005	16.0785	17.3827	11.8341	8.53223	17.553	9.57081	12.2643	10.0841	10.2211	13.3692	9.51048	9.92041	8.58226	8.83233	11.7622	8.54433	7.60612	8.51999	11.16	10.3031	10.4884	9.15322	13.8085	10.7657	18.9104	11.6267	8.74043	16.2983	11.9348	15.6002	8.95833	13.9487
PF3D7_0105700	NA	NA	0.306766	0.33159	0.244213	0.149913	0.370729	0.257424	9.7093	9.31655	10.2437	8.64999	7.40136	3.55729	13.6252	15.8064	11.0144	4.1681	13.451	11.1896	0.158185	0.109981	0.0901026	0.16929	0.0779824	0.211872	0.106877	0.168003	0.148742	0.231498	1.11545	0.686538	3.14497	1.58165	2.92691	1.51228	5.09111	5.02648	2.75579	7.17634	3.8329	7.45403	9.19128	9.27502
PF3D7_0105800	NA	NA	0.150449	0.813119	0.244986	0.183807	1.13637	0.189375	36.3493	38.9326	41.2675	45.5831	44.5783	48.3527	91.7704	75.0359	86.0057	22.6201	105.899	79.6775	0.193949	0.485448	0.331422	0.355825	0.0956134	0.259774	0.235873	0.102993	0.425534	0.425756	4.74116	3.36703	10.9254	5.9318	12.254	5.49124	20.4085	19.6341	21.1091	24.6016	19.5077	20.1438	28.1998	38.6504
PF3D7_0105900	NA	NA	0.139559	0.215504	0.606009	0.68201	0.281097	0.175668	6.88127	8.84053	11.8586	11.5012	14.4881	14.6294	23.2888	8.98867	19.5424	1.86513	23.2868	22.1497	0.35982	0.150103	0	0	0.177385	0	0	0	0.112781	0.338519	2.8756	2.14728	4.17306	2.32795	6.00826	3.43995	8.32144	9.41	3.10197	3.72185	5.55146	3.73714	6.28199	10.0148
PF3D7_0106000	NA	NA	0.611006	0.47175	0.663295	0.74648	0.273483	0.341819	8.51207	6.67956	8.70366	10.3669	15.4661	19.6292	29.2666	16.7056	39.9066	8.73284	36.0737	32.6649	0	0.657169	0.239284	0	0.172581	0	0.212874	0.278852	0.54863	0.164675	0.740572	1.04456	1.83668	0.8236	2.76478	1.4803	12.6501	4.57756	13.8637	11.149	9.55579	7.67583	13.3697	11.4973
PF3D7_0106100	NA	NA	20.561	15.8749	16.6518	26.7147	25.3082	25.6754	24.1382	23.973	32.1106	34.411	41.175	49.6254	40.0213	30.7221	49.2162	20.4454	41.7681	29.852	13.6736	36.5064	15.8168	28.9455	17.63	13.9002	11.5979	13.6286	16.2202	15.437	25.9099	21.6838	31.8325	28.4574	30.5695	28.465	40.1363	30.524	38.764	51.7641	25.2157	20.8776	21.4622	28.26
PF3D7_0106200	NA	NA	0.580205	1.3439	1.25971	0.354424	0.292159	0	0.408689	3.90997	1.2974	2.81265	5.01942	7.01774	9.16867	11.4983	10.7137	4.3617	6.10953	11.6318	0.747959	0.31202	0.766873	0.343058	1.84366	1.33575	1.21285	3.17753	4.45432	2.11104	3.51619	0.811556	0.413074	0.879841	0	0.550049	0.86489	0.946481	0.806009	0	2.44112	2.15789	3.2646	4.99625
PF3D7_0106300	calcium-transporting ATPase	ATP6	92.2341	87.5496	87.0648	78.985	89.0882	76.9494	185.03	167.605	150.038	171.409	180.846	215.196	272.974	264.649	292.566	162.259	260.512	265.464	90.3101	124.812	92.459	99.6047	90.4037	79.8192	63.256	71.099	64.73	75.4822	75.888	76.9506	95.6126	81.7243	97.3532	87.3436	103.213	115.888	73.3082	100.334	140.411	91.9315	150.146	164.157
PF3D7_0106400	NA	NA	110.158	107.855	104.42	138.483	152.339	135.644	71.971	54.3311	82.1079	108.833	79.9911	136.089	24.2193	23.0699	22.724	60.008	19.3972	19.337	110.107	200.901	90.0318	125.546	111.606	70.7524	82.1806	75.9572	79.0219	66.8004	124.325	121.144	128.437	145.258	141.178	140.756	181.462	105.909	52.673	142.294	47.0188	99.7524	37.8964	98.1429
PF3D7_0106500	NA	NA	0	0.0342639	0.192704	0	0.134078	0.111721	0.437633	1.61494	1.52159	1.29079	1.66366	1.63586	9.25698	5.13027	4.98507	1.26032	8.41143	7.08043	0.171628	0.190925	0.078208	0.0524792	0.112813	0.102168	0.0927679	0.455702	0.35863	0.143527	0.268944	0.434516	0.505518	0.20189	0.619641	0.336574	0.661531	1.06177	0.739793	0.747478	0.305533	0.990308	2.27852	2.20797
PF3D7_0106600	NA	NA	0.208874	2.09649	0.226748	0	0.631063	0.525831	0	0	0	0	0	0	0	0.6899	0	0.697871	0	0	0	0.449309	0	0.247002	0	0	0	0.285978	0.675181	0.337767	0	0	0.297413	0	0	0.198018	0	0	0	0.879532	0	0	0	0.19985
PF3D7_0106700	small ribosomal subunit assembling AARP2 protein	AARP2	42.5316	55.8315	61.1036	16.6449	29.2004	23.7998	101.072	105.584	86.7077	70.279	40.0435	24.698	54.0444	63.389	29.4982	33.4832	59.2803	55.918	50.7194	16.7199	22.2398	22.4626	25.4756	23.0215	23.231	30.1921	26.1838	33.0117	81.0307	79.2803	126.219	101.645	116.556	101.672	26.4928	104.286	5.27754	17.1003	17.1697	25.4003	22.0514	72.3638
PF3D7_0106800	ras-related protein Rab-5C	RAB5c	13.4068	12.1514	11.0738	18.1597	19.0786	24.9464	91.151	62.4576	86.8954	98.1941	137.836	157.123	193.438	154.024	251.15	100.299	202.552	188.679	4.88435	8.46373	5.9067	8.2717	9.63161	8.0518	7.92022	12.9688	13.1896	14.3747	22.255	21.6063	36.1046	34.0314	49.1726	39.2351	114.697	68.1466	67.6148	97.7713	149.378	72.4088	177.723	104.851
PF3D7_0106900	2-C-methyl-D-erythritol 4-phosphate cytidylyltransferase, putative	IspD	0.341018	0.0658239	0.555302	0.104157	0.515153	0.643875	4.20366	6.89431	10.5486	10.3322	10.4486	4.22292	24.6813	10.7005	19.1535	4.4151	23.3409	18.7296	0.219808	0	0.0751222	0	0.108362	0	0.0891077	0.0583629	0.068896	0	1.34333	0.476996	1.33532	1.55139	2.28157	1.21235	4.32092	6.02657	3.67146	4.30791	1.63043	8.37086	5.99621	12.7251
PF3D7_0107000	centrin-1	CEN1	2.96625	8.01572	4.42763	4.52992	6.34797	5.60057	333.781	354.812	319.482	198.616	351.775	307.523	704.05	1035.46	677.247	329.527	789.873	706.79	3.82388	4.78554	1.96029	0.87693	4.71278	3.84128	6.20063	2.53827	5.09382	3.29772	26.9644	18.152	72.3295	42.7322	77.2254	35.8541	162.497	128.632	309.05	144.68	318.525	182.029	440.46	316.449
PF3D7_0107100	NA	NA	0.230375	0.35574	0.750271	0.140727	1.74006	1.30491	11.0346	10.2464	8.24229	10.1907	8.47028	11.1458	7.28101	8.37011	7.62172	2.88642	7.46414	7.50511	0.148492	0	0.304494	0.272429	0.146408	0	0.722362	0.157709	0.651599	0.558805	1.95459	2.739	3.93635	4.36686	8.04167	3.82203	8.75701	9.01941	4.96051	5.98211	6.07996	9.76764	7.77743	9.14754
PF3D7_0107200	CCR4 domain-containing protein 3, putative	CCR4-3	0.926954	0.143138	0.201256	0	1.12023	1.16679	22.7222	20.4892	12.1602	7.41441	12.8307	10.6779	10.0779	17.4516	10.8405	3.40677	7.80863	8.67226	0	0	0.163358	0	0.235639	0	0.387539	0.253827	0.299636	0.299793	4.49407	5.18628	9.76712	4.21699	5.82426	3.51511	7.73795	7.45984	14.6799	13.0108	10.2109	11.0321	7.56267	11.5298
PF3D7_0107300	NA	NA	0.156655	0.362854	0.170061	0.191389	0	0.394374	3.08969	0.633415	1.86825	1.32898	1.35524	1.44365	2.77261	1.81099	1.20529	2.35532	1.01512	1.04687	0	0	0	0.926258	0	0	0.491206	0.321725	0	0.126663	0.379749	0.43824	1.56142	0.237557	1.09367	1.18811	1.86816	0.681466	0.652868	1.75906	0.599184	0.233052	0.220361	1.49887
PF3D7_0107400	ATP synthase-associated protein, putative	ATPk	0.406897	0	0.441718	0.994229	2.0489	0.512174	62.4817	65.8093	63.6904	45.3676	57.4952	57.1835	112.653	159.259	101.433	56.4188	94.9205	93.8101	0	0	1.07561	0.481173	0	0.468381	0.850573	0	0.328822	0.328994	2.95908	1.70743	11.5875	7.40438	9.94242	5.40048	27.9011	23.0106	44.655	21.7027	70.657	36.3199	81.2759	68.1307
PF3D7_0107500	Niemann-Pick type C1-related protein	NCR1	114.589	105.74	107.748	105.023	173.231	163.433	107.961	95.8232	84.5857	95.9207	92.4379	105.207	68.9315	59.0237	71.0559	90.1634	66.6627	68	105.436	151.378	119.401	118.883	111.753	103.317	110.908	119.913	115.735	113.385	109.097	106.119	127.558	120.216	131.151	123.495	133.413	105.254	65.5087	123.111	85.1811	104.628	68.9395	91.4609
PF3D7_0107600	eukaryotic translation initiation factor 2-alpha kinase 2, putative	eIK2	0.039262	0.0606273	0.0426219	0.0959344	0	0	0.165934	0.0529169	0.175588	0.142747	0.11322	0.271363	0.19854	0	0.241663	0.196768	0.318021	0.229576	0.101228	0.0844566	0.24217	0	0	0.135584	0.0820729	0.268776	0.0634568	0.031745	0.0475876	0.0549173	0.447238	0.0595381	0.182735	0.111664	0.409685	0.213492	0.327252	0.330651	0.0901029	0.467273	0.138071	0.225395
PF3D7_0107700	NA	NA	0	0.216468	0.15218	0	0.141177	0.882268	3.94975	2.45619	8.56804	7.30533	13.1381	16.6326	11.1649	5.09322	8.19708	4.21533	7.2671	6.20625	0.36143	0.150775	0.247046	0.165773	0	0.161366	0.293039	0.191932	0.339856	0	0.84955	1.76473	2.39527	0.850317	2.77291	1.46187	18.3891	4.42115	21.6162	28.1372	8.7934	25.2343	10.4511	7.91352
PF3D7_0107800	double-strand break repair protein MRE11	MRE11	0.406237	0.901745	0.606378	0.372232	0.357977	0.31959	10.516	13.8249	16.4267	11.1389	13.179	5.79097	19.1945	16.7723	14.5339	3.30838	25.1724	16.5004	0.261846	0	0	0.180147	0.258172	0.116905	0.265373	0.208574	0.73865	0.656921	3.38512	3.97755	7.08585	6.08331	8.74461	6.7878	9.84041	13.5299	2.25735	6.27219	2.87453	7.17666	7.14297	19.1914
PF3D7_0107900	NA	NA	4.76777	3.33055	4.43638	3.60588	8.00261	8.85912	10.5548	20.5018	32.8298	23.9381	18.0045	26.1531	22.9615	13.873	27.2501	7.20628	18.3899	16.3099	3.21948	0.976759	0.800215	0	0.865717	2.61343	3.55947	4.81811	5.87114	3.48781	10.732	9.84453	15.8405	15.1486	22.7187	19.1561	9.81462	20.2465	2.83856	5.09874	12.331	4.7286	4.63077	20.6367
PF3D7_0108000	NA	NA	134.194	169.663	154.065	138.08	188.166	181.52	520.39	548.381	545.547	462.237	530.134	474.295	926.011	963.024	843.596	455.05	899.241	938.594	150.125	112.943	124.296	149.893	135.653	128.781	137.269	166.102	146.829	169.115	221.26	207.714	333.266	305.028	347.243	256.067	282.357	383.364	389.932	329.724	475.845	300.946	602.319	642.531
PF3D7_0108100	NA	NA	0.381504	0.220916	0.517691	0.349569	0.768417	0.84037	3.35909	4.24205	3.83887	6.24177	8.66366	6.592	9.8871	7.71806	12.3281	2.70863	7.72544	7.88735	0.245904	0.410328	0.0840409	0.225573	0.606134	1.42724	0.0996867	0.391751	0.154151	0.385579	0.462403	0.800439	1.35805	1.44631	2.21952	1.8988	8.81477	3.73406	8.74465	7.89839	6.49344	9.36466	11.0683	5.93162
PF3D7_0108300	conserved Plasmodium protein, unknown function	ARP	152.933	216.907	213.105	38.2434	91.8761	63.9659	284.258	292.819	240.3	181.651	115.031	48.4356	211.234	238.965	111.568	121.452	255.243	238.018	204.857	40.7351	80.238	72.4999	91.5821	110.209	76.8127	102.647	97.2433	132.5	291.596	300.417	340.151	335.787	319.897	318.709	75.5421	353.921	24.0149	54.5453	43.6849	95.4026	98.3391	256.738
PF3D7_0108400	NA	NA	4.9221	3.94645	5.95985	5.55086	5.91026	6.43389	15.2018	17.0952	14.6751	17.6661	14.1939	19.8447	6.22251	11.5678	10.4872	7.9064	11.654	8.22312	3.17261	4.2759	4.67074	3.13416	3.60933	4.79418	6.13389	6.73906	5.6605	4.43893	6.88366	7.14954	14.5562	15.2151	11.4543	12.5631	12.4168	11.3235	15.2533	23.9148	10.8613	7.88576	7.85575	17.5699
PF3D7_0108500	NA	NA	4379.04	4608.79	4798	4037.46	2912.35	3302.66	348.203	393.656	506.504	514.293	457.269	417.455	394.766	347.25	409.265	3387.58	1389.03	1578.73	9340.81	7341.71	8723.03	6642.71	5835.84	7123.31	3273.98	3374.78	2312.21	3890.79	2245.16	2715.14	707.843	957.619	672.807	1000.32	487.279	835.175	313.86	363.051	536.336	458.854	405.463	376.384
PF3D7_0108600	NA	NA	1.42878	0.945549	3.1021	1.24683	0.411116	0.256921	48.883	51.9937	50.2055	46.2575	61.2141	62.5424	61.4128	72.8103	70.9828	31.0291	54.228	52.5138	2.89438	1.09766	1.07912	0.24137	0.259433	0.469907	1.92002	0.838372	1.15462	1.98039	6.18483	3.42598	13.9503	8.66658	11.8748	5.41807	30.4261	24.1954	65.2159	45.8388	54.3364	43.7258	51.6807	59.7597
PF3D7_0108700	secreted ookinete protein, putative	PSOP24	31.3039	36.7155	37.8176	17.396	29.3912	21.6854	47.8517	53.1783	50.7976	50.5179	49.6022	36.9364	88.2864	85.5344	87.0572	47.937	97.6384	81.0345	26.9032	10.8138	17.8622	15.7456	19.2725	28.2142	29.1401	28.1266	34.3446	33.7913	46.637	49.9434	57.5738	57.7719	54.4462	56.0563	39.0483	51.7158	19.6294	29.3686	29.4343	28.702	38.1474	55.1711
PF3D7_0108800	NA	NA	6.59601	6.43287	5.65301	8.27055	15.5581	10.9245	24.4534	21.9911	30.0162	27.3474	40.2944	44.1892	62.7594	54.7524	51.5506	28.1275	56.2395	50.7484	4.69909	4.85403	3.05899	4.31056	4.85377	6.39386	11.2483	8.55558	10.2399	12.0698	14.0959	9.22611	21.5027	14.2139	18.1773	19.9115	20.9586	23.7853	10.1276	22.9019	23.6354	17.0432	19.7775	43.513
PF3D7_0109000	photosensitized INA-labeled protein PHIL1	PHIL1	15.5959	21.5025	20.8609	20.7551	10.6579	26.2916	14.1243	20.2693	16.6067	12.4882	7.22797	8.66189	45.0659	65.3105	89.9953	43.268	277.467	316.386	20.1051	18.2719	22.0859	27.3349	11.6814	11.5409	5.8217	4.00369	4.27614	5.40427	4.38821	3.89547	5.55171	2.53394	2.26835	3.16828	6.22721	9.08622	6.57704	2.34542	13.2087	2.90021	49.1649	8.26046
PF3D7_0109100	LCCL domain-containing protein	CCp5	0.60837	0.610629	0.0660432	0.222978	0.245073	0.459464	0.771351	0.655964	0.544151	0.589837	0.789463	0.21024	0.46146	1.00471	1.12338	0.711422	2.85811	3.45567	0.548987	0.3926	0.375247	0.287769	0.0773262	0.14006	0	0	0	0.344325	0.147475	0.255286	0.0866252	0.0922552	0.5663	0.173025	0.181375	0.529294	0.507082	0.768523	0.558463	1.44809	0.427885	1.22238
PF3D7_0109200	cleavage and polyadenylation specificity factor subunit 5, putative	CFIM25	9.6817	13.4967	10.8022	8.87125	12.4587	10.1555	56.4517	43.1338	28.4648	39.4374	34.5112	47.089	38.4187	52.8528	48.0049	27.8549	35.7253	37.2918	9.70741	7.23137	5.92434	9.22282	12.3058	7.73934	13.2113	10.1258	9.99731	11.0898	21.8396	17.6801	22.9761	24.4694	26.2855	18.612	24.0536	29.8324	16.0648	37.3707	23.6588	19.6044	18.7259	41.6854
PF3D7_0109300	NA	NA	0	0	0	0	0	0	0.546606	1.8303	2.89203	4.23203	0.839161	2.23475	1.22627	1.28155	0.895575	0	1.5714	1.45848	0	0	0	0	0	0	0	0	0	0.156858	0	0.542712	0	0	0.677193	0	1.15676	2.32078	1.88651	2.99531	1.18724	2.30888	0.409339	2.59867
PF3D7_0109400	NA	NA	39.7735	41.4277	43.5846	52.2595	82.0004	76.0409	280.689	258.929	369.175	301.947	338.676	358.751	126.179	119.596	124.138	63.9367	91.7865	107.194	23.7018	18.9678	22.8133	16.8612	38.6307	53.5581	83.5345	63.1892	97.9416	68.2613	133.708	109.166	197.147	175.821	228.775	195.646	295.886	311.761	312.751	397.633	439.737	399.678	193.706	349.678
PF3D7_0109500	NA	NA	167.902	156.306	164.829	166.852	180.015	204.771	106.951	130.473	182.035	217.602	248.461	280.864	256.949	170.485	284.944	169.771	209.532	211.722	128.937	183.612	173.785	153.426	154.697	202.983	234.268	246.656	216.837	231.89	222.494	201.703	149.278	195.528	183.68	213.631	180.23	196.577	146.198	168.013	227.69	209.15	192.674	196.391
PF3D7_0109600	cold-shock protein, putative	CoSP	9.12958	7.36923	4.50494	7.60487	10.0301	7.83524	36.8308	46.4225	30.9313	52.3041	25.1304	37.2863	17.3124	27.4132	9.5785	5.546	12.1008	17.3322	7.4895	4.46334	5.85058	4.90732	4.21965	9.55373	6.93978	10.227	14.0849	15.0988	27.6638	19.7353	28.3626	30.2059	35.2484	36.5874	45.1576	54.1563	70.331	54.7523	34.2844	74.0829	32.9811	38.1171
PF3D7_0109700	rRNA biogenesis protein RRP36, putative	RRP36	46.3155	53.9023	52.4972	26.628	38.0695	32.15	29.7455	35.8017	57.8752	26.0017	34.8632	18.4379	40.4697	28.6833	28.2982	36.9796	51.8595	24.4648	69.8041	39.1924	33.0089	47.1183	34.1958	43.1216	25.6281	32.1725	26.9705	39.1002	73.8859	53.8273	64.0085	54.7414	63.401	65.2167	45.6888	55.184	17.5044	36.8065	9.11802	43.5707	29.4613	39.7528
PF3D7_0109800	phenylalanine--tRNA ligase alpha subunit	cPheRS	33.942	30.2379	30.7055	32.8285	31.5531	37.7941	29.7321	34.8965	47.1928	54.8466	71.2131	67.7963	62.3011	44.1967	71.1459	40.7092	53.7521	51.9798	40.8105	51.6003	45.5331	42.1962	36.0896	45.3321	43.4354	39.322	37.6273	33.6887	41.9306	41.6937	39.81	41.4075	44.9365	50.9483	69.7318	50.5184	34.4569	65.8122	44.6891	71.8578	59.2984	56.9364
PF3D7_0109850	NA	NA	0.314885	0.162079	0	0.128234	0.211411	0	1.18294	3.81959	3.1294	5.85144	12.8638	12.3327	20.5673	13.174	24.3885	7.01378	25.5056	21.3932	0.541237	0.564459	0.277462	0.124122	0.400231	0.60411	0.219411	0.431123	0	0.42433	0.508876	0.146814	0	0.159167	1.09916	0.298519	5.78912	1.59808	5.24919	1.47325	6.26283	1.56149	9.89223	2.51068
PF3D7_0109950	respiratory chain complex 2 associated protein 3	C2AP3	1.49195	3.74374	4.45399	1.36707	6.01012	3.28645	28.9002	24.6328	28.3574	38.8748	42.4858	81.2052	57.9984	44.9667	75.7614	18.693	41.6925	47.6698	4.80831	6.81987	2.62928	1.32323	6.16308	3.86414	7.01723	5.61743	8.43976	8.14259	9.9458	6.78229	6.90423	9.0498	15.6238	10.9617	41.1441	19.0648	36.2704	42.406	58.2065	26.0797	35.4151	32.8325
PF3D7_0110000	NA	NA	6.39953	6.58799	5.78932	4.88653	15.5752	15.4393	78.8857	70.0799	115.673	119.244	141.484	153.272	91.6899	64.7331	85.3451	36.5269	51.4041	71.7215	2.4062	7.74341	7.51862	6.30643	7.1173	11.3567	13.0988	15.8809	15.7303	9.91741	26.5016	23.1242	47.8392	38.4135	42.5056	38.1711	101.358	84.6758	73.7139	178.901	148.088	157.484	86.8314	140.32
PF3D7_0110100	selenocysteine-specific elongation factor, putative	SELB	7.84114	7.39938	8.58492	7.45087	9.38157	9.27938	17.0889	17.704	22.8786	20.7113	20.5823	19.9177	17.1991	15.4951	16.9128	11.1958	13.5712	11.7563	5.5293	6.84776	4.72426	6.1024	5.11097	7.40593	8.33562	5.13843	8.23215	7.58621	10.8035	9.28038	14.6957	13.1101	16.3758	14.6131	13.6865	19.9702	8.56525	17.1203	13.8934	14.0579	10.9355	18.788
PF3D7_0110200	FAD-linked sulfhydryl oxidase ERV1, putative	ERV1	8.26792	9.40733	8.97546	9.56946	17.0913	11.5026	42.2993	42.2277	42.1654	53.2645	44.5474	51.6305	56.1123	59.6476	66.2912	27.6241	44.4116	34.1685	8.97551	31.8261	17.2546	19.5543	9.40265	12.5227	9.09641	15.7884	19.6928	12.6663	21.0972	24.3467	37.1766	23.7557	33.4176	22.6895	64.2181	36.4395	70.7273	61.6894	45.6046	49.8473	58.1507	47.048
PF3D7_0110400	DNA-directed RNA polymerase II subunit RPB9, putative	RPB9	118.807	96.7612	100.948	128.307	139.844	149.231	138.771	144.587	178.978	193.803	220.453	239.357	178.397	152.33	222.546	133.573	168.51	160.38	108.568	190.866	143.117	124.489	104.814	131.278	161.378	146.878	152.726	129.094	122.735	102.724	129.91	139.874	144.364	146.85	229.784	150.468	249.657	244.51	235.264	272.951	248.919	154.444
PF3D7_0110500	bromodomain protein 3, putative	BDP3	5.23555	5.92588	6.04067	2.04282	4.74815	3.93339	17.4546	22.9056	23.6596	18.0386	17.3901	8.17815	22.1088	18.5603	16.5346	6.45668	17.6736	16.3258	1.90818	1.0024	1.73905	1.16694	2.43885	3.72328	4.46942	4.74754	5.71511	4.94239	12.1932	11.4257	17.3686	17.1257	19.073	16.8913	15.6906	24.2061	3.73176	13.0045	8.53431	23.6926	12.4543	19.4867
PF3D7_0110600	phosphatidylinositol-4-phosphate 5-kinase	PIP5K	22.157	21.3203	19.2425	17.5393	28.1046	25.0776	25.5389	27.1481	30.3004	31.3797	33.1088	32.0201	42.3634	38.1642	42.9426	29.3057	42.3017	38.0873	23.5115	32.1029	30.9474	27.4142	21.4127	27.1491	28.3259	27.854	25.8076	23.926	22.5497	24.2812	25.6564	27.6572	29.6161	28.6437	40.5078	26.5656	46.6534	48.4745	31.3215	58.2972	50.6662	33.2889
PF3D7_0110700	chromatin assembly factor 1 subunit C, putative	CAF1C	10.7941	8.22578	9.73953	4.4529	27.8119	19.9392	676.394	705.684	704.042	601.246	604.352	504.954	469.101	539.65	416.541	203.273	399.69	417.81	6.50574	4.07092	6.67025	6.13361	7.48351	8.22968	18.7545	15.6424	21.5242	23.0089	105.514	75.295	203.199	120.107	237.165	140.606	382.2	320.152	622.78	388.411	572.107	429.818	559.726	489.029
PF3D7_0110800	NA	NA	105.572	109.777	109.246	77.3878	128.613	109.953	205.58	222.154	200.025	192.949	171.124	169.079	108.278	137.511	104.284	127.153	112.822	115.639	119.413	87.1757	87.3235	100.882	104.102	127.601	136.505	133.12	148.476	148.002	175.221	175.058	241.486	221.29	219.526	198.717	161.18	245.735	122.294	202.914	153.573	174.029	87.7849	254.157
PF3D7_0110900	adenylate kinase-like protein 1	AKLP1	12.7335	16.2993	14.5507	16.3755	17.8857	27.8381	33.0448	32.0659	48.9542	67.4133	57.4952	67.5504	15.2504	16.0485	22.1723	19.0329	17.3711	14.8353	26.3506	49.0155	31.5935	25.3606	17.4625	32.401	13.309	19.9573	19.2264	14.3596	38.9902	18.2795	29.5823	27.4398	43.2788	33.0382	85.416	38.993	74.0149	49.8558	34.6053	92.224	21.9182	30.4584
PF3D7_0111000	NA	NA	0.451619	0.871722	0.817112	0.367835	0.113705	0.142117	5.67305	6.59411	6.33971	6.15742	7.10859	5.4191	15.2725	13.9845	15.0571	4.52673	19.9976	17.322	0.291098	0.0404783	0.198972	0.178019	0	0.129965	0.118007	0.103055	0.152068	0.0912883	0.50177	0.315849	1.44687	0.627779	1.31371	0.856292	2.18794	3.6836	2.5618	2.37711	4.86545	2.40751	4.79102	11.811
PF3D7_0111200	NA	NA	0	0.987359	0	0	1.28788	0	16.2141	13.7886	9.5319	18.5979	36.8774	22.8332	21.8252	11.6157	44.2761	2.13634	15.5376	26.7058	0.824281	0	0	0	0	0	0	0.437722	0	0.51699	1.55	0.894368	2.73134	4.84811	4.46394	3.03088	21.9223	9.73523	45.301	19.7446	9.7826	30.4395	16.6395	21.4125
PF3D7_0111300	NA	NA	0.429192	0.869856	0.524162	0.589898	0.864469	0.472708	23.732	26.0307	29.6713	25.8773	29.3946	23.9784	58.5313	39.5157	44.1666	9.41051	63.5321	46.2485	0.276642	0.0577024	0	0.126885	0.06819	0.0617557	0.280369	0.293813	0.563614	0.780796	6.50255	4.12726	13.9794	8.29823	13.6708	10.2739	11.1162	19.5455	2.01226	9.56341	6.27912	11.7324	13.8857	35.4699
PF3D7_0111400	conserved Plasmodium protein, unknown function	GEXP19	0.348607	0.605598	0.56766	0	0.351078	0.109701	13.1372	15.505	15.5904	19.3286	11.9377	5.01964	29.858	19.4304	19.4456	4.36776	36.2846	25.3345	0	0.0937362	0.153588	0.206121	0.221547	0.200642	0	0.35797	0.422575	0.140932	4.11967	1.58474	6.7011	6.21151	8.51813	6.77501	8.83415	15.3543	6.17455	7.2173	3.33343	14.7805	11.4011	21.5137
PF3D7_0111500	NA	NA	5.22184	9.75415	8.04591	7.8202	20.3569	22.4751	233.981	250.869	293.547	273.553	309.18	315.507	360.311	305.169	379.992	119.876	399.227	371.047	3.04009	3.07994	1.48427	3.38632	7.27947	6.39869	10.7396	9.57104	16.7434	14.0282	53.8998	42.4104	121.604	91.1913	144.842	96.1344	193.094	179.16	147.188	182.527	282.196	217.516	288.127	273.988
PF3D7_0111600	NA	NA	17.8675	14.3782	18.0306	18.4471	15.2063	15.5215	14.8901	17.6373	34.5139	39.0382	37.3735	19.7125	42.631	27.0141	47.2437	22.2814	37.9142	31.1117	12.3278	9.74405	11.5308	9.22538	11.5151	15.0634	26.3029	21.3622	22.7772	22.3821	25.9266	30.976	22.5747	22.8971	33.381	42.2278	37.5133	41.8732	8.39027	24.0194	26.3737	24.7092	24.7795	22.8744
PF3D7_0111700	NA	NA	4.77931	2.87003	2.8824	3.89266	3.74359	6.01587	3.74055	2.14717	12.6661	5.14858	8.42242	12.2343	13.4267	6.13894	17.9773	4.43562	8.60273	7.98457	1.36915	5.1404	1.40377	0	2.0249	0.611277	0.555035	0.727063	2.1457	2.57619	6.43642	4.45668	3.78067	8.85806	4.94313	8.05495	27.7058	8.66271	4.42622	4.4722	5.68717	11.8501	4.10842	4.06474
PF3D7_0111800	NA	NA	13.5213	11.3745	14.2402	8.87602	13.0074	8.89087	35.2539	42.1597	54.4531	42.0674	34.6267	28.0128	44.5199	37.1613	33.6939	13.9911	50.0205	35.6541	2.86176	1.5194	1.95608	1.90919	5.13018	5.34301	8.12085	7.32215	9.78523	10.851	33.7554	26.9578	48.5631	36.7238	44.0284	45.0562	22.8632	53.6614	9.39176	21.1031	11.8872	23.5679	13.8391	59.7619
PF3D7_0111900	NA	NA	24.4535	24.7803	22.3983	25.2073	28.4748	25.9709	135.645	135.952	117.335	115.764	112.386	143.485	172.926	188.04	230.476	84.2552	162.172	141.072	21.6726	25.4791	20.8739	25.3026	33.0239	27.2689	30.351	30.8647	41.9929	35.2184	49.0895	47.0307	70.7263	67.2113	69.3545	73.1699	124.164	89.7541	162.421	159.817	124.513	113.684	155.327	154.274
PF3D7_0112000	TatD-like deoxyribonuclease	TatD	5.7347	5.07564	5.92178	5.46826	4.78932	6.69027	11.0346	16.0239	19.3915	18.8159	20.5707	12.2452	20.3348	9.23973	25.1821	12.6178	17.674	14.2542	8.47464	9.47761	8.87381	8.93177	7.11125	8.21131	5.84769	6.31961	5.31253	7.46404	10.6804	8.80394	8.5639	9.96892	14.4846	11.1385	24.3945	15.9719	14.1843	17.4729	12.1977	18.9355	15.2482	16.5947
PF3D7_0112100	PIMMS1 protein	PIMMS1	0	0.885011	2.07392	0.466803	1.15438	0.961887	0	0	1.13918	0.926116	0	0	0.483033	0	0	0	0	0.319167	0.985117	2.87667	1.3467	1.3555	0.971292	0.439821	0	0.523131	1.23509	0.308933	0.463108	0	0	1.15882	0.88916	0	1.13912	0.415528	0	0.5363	0	0	0	0
PF3D7_0112200	multidrug resistance-associated protein 1	MRP1	3.67792	3.79508	3.5822	3.10758	6.50794	6.53323	40.5793	41.8802	47.0906	57.1123	49.2636	64.4613	34.9373	20.9468	32.7935	9.01529	28.0091	24.6068	0.576047	0.3697	0.242303	0.284533	2.75244	1.30571	2.69449	2.37661	3.74997	2.4735	24.5389	16.9719	49.9713	38.7806	58.1929	44.8391	60.2055	52.5211	25.6897	51.3824	19.3001	40.4486	19.0745	44.662
PF3D7_0112800	NA	NA	0.614334	0	0.333454	0	0	0	0.43273	3.31197	3.66324	1.48905	4.87179	4.59986	2.32992	4.05823	5.19931	1.53942	4.47848	5.64487	2.37587	14.8668	4.05991	8.71772	2.34253	8.13238	0.6421	0.630834	0.496456	0	1.11691	0.429647	1.31212	0.465798	0.714815	0.873607	2.7473	1.33621	4.26711	0.862287	1.64482	0	3.45664	1.17559
PF3D7_0112900	NA	NA	0	0.255982	0.719836	0	0	0.417327	0	0.893707	3.95397	2.81265	0.47804	0.763835	0.838279	1.09508	1.02036	0.553866	9.66783	6.64677	1.70962	4.99232	0.292142	0	0	1.52658	0	0.226967	0	0	0	0	0.472084	0	0	1.25725	0.494223	0.721128	0	0	0.253623	0	0.233186	0.317222
PF3D7_0113000	glutamic acid-rich protein GARP	GARP	4137	7176.05	7364.41	306.45	773.754	612.157	3039.79	3624.81	3413.72	1246.61	928.966	190.844	462.845	656.224	183.405	1494.11	764.204	664.62	4411	180.49	362.091	476.157	1505.24	2502.74	1722.87	1046.96	1479.71	2810.33	10208.9	11190.3	8668.36	10019.1	6779.43	10295.9	537.443	8016.83	52.4361	302.486	127.944	649.504	316.875	3314.42
PF3D7_0113100	surface-associated interspersed protein 1.1 (SURFIN 1.1)	SURF1.1	0.0805425	0.0932787	0.218588	0	0	0.152072	1.24813	1.30265	0.900507	0.634473	0.522588	0.371118	0.203644	0.399042	0.0619689	0.0672755	0.456675	0.201838	0.0519149	0.0433139	0.0709702	0.0476225	0.0511864	0	0.378822	0.854626	1.33431	0.488416	0.146433	0.112658	0.401393	0.488549	0.562296	0.381782	0.240124	0.788329	0.111888	0.395676	0.184838	0.838749	0.368212	0.924755
PF3D7_0113200	NA	NA	12.0463	15.3382	13.0772	6.84224	23.0929	13.567	145.143	137.151	99.241	78.6308	64.9055	54.7759	69.9998	107.848	61.9517	34.7759	59.9145	63.2004	1.226	1.02288	0.651777	0.624794	10.7448	9.12277	19.6593	13.5996	31.0834	19.9926	79.0236	69.3203	167.615	145.339	165.864	124.32	80.9642	120.09	28.4781	60.0692	32.0104	96.9938	56.4093	97.9703
PF3D7_0113300	NA	NA	37.4901	41.6817	39.3031	28.3976	20.3882	24.1343	7.99773	9.81703	12.2953	9.8659	4.16998	6.78638	7.85403	6.3683	4.9448	40.7986	6.76748	8.41072	93.2072	83.871	87.8718	84.614	61.2661	57.8279	22.9509	34.684	20.6017	39.0597	27.1342	32.9617	6.55834	7.95918	8.72441	12.795	7.18524	12.4644	3.42244	4.96146	5.40802	5.57732	7.98572	10.0437
PF3D7_0113400	NA	NA	0.870307	0.55996	2.51943	1.94933	0.292159	0.912902	1.43041	1.17299	0	0.17579	0.209143	0.501267	0.183373	0.958194	0.446406	0	0.704946	0	0.18699	0.78005	0	0	0	0.834846	0.151607	0.794384	0.937751	0.938241	1.05486	0.608667	1.23922	0.439921	0.337551	1.1001	0.432445	0.788734	0	0.203595	0.88768	0.215789	0.102019	0.555139
PF3D7_0113600	surface-associated interspersed protein 1.2 (SURFIN 1.2), pseudogene	SURF1.2	0.13123	0.455943	0.14246	0	0.396479	0.165183	0.0924365	0.0884349	0.489071	0.23856	0	0.0755837	0.3318	0.325084	0.504836	0.438453	0	0.274049	0.42293	0.635149	0.693799	0.465554	0.833989	0.981884	0.480062	0.269508	0.371173	0.530524	0.636228	0.275334	0.280285	0.199001	0.534427	0.497636	0.391238	0.428146	0	0	0	0.195227	0	0.3139
PF3D7_0113700	heat shock protein 40, type II	HSP40	189.23	218.853	214.033	129.936	133.103	114.887	50.1623	50.5055	48.4447	50.502	40.3547	34.927	37.1516	42.8833	30.8651	129.877	30.4789	34.9388	211.871	153.523	162.082	174.679	153.956	175.763	156.341	196.388	182.575	232.078	165.469	205.962	112.249	143.831	90.4604	136.647	40.3301	99.768	10.3681	36.2289	27.7141	37.2421	26.5745	67.2448
PF3D7_0113800	NA	NA	0.388803	0.516993	0.398627	0.0527788	0.282793	0.21751	0.426017	0.436687	0.644003	0.890042	0.21801	0.472756	0.682673	0.749115	0.365619	0.144337	0.209953	0.342821	0.111382	0.162625	0.247429	0.102173	0.109819	0.149184	0.203188	0.207016	0.244378	0.314364	0.523611	0.422983	0.799663	0.655104	0.628327	0.941966	0.354185	0.587268	0.240052	0.879229	0.198282	0.835486	0.258265	0.785346
PF3D7_0113900	CX3CL1-binding protein 1	CBP1	7.44754	11.302	6.69094	8.15757	11.1212	7.11166	1.44716	1.38451	1.14852	2.80112	1.11086	2.66247	1.62331	1.69647	3.55661	12.0125	1.2481	2.78878	8.27659	29.555	16.7455	11.2366	9.79254	18.6239	11.542	13.8887	14.1124	12.8739	6.84793	7.54348	4.38806	5.45213	3.28698	5.59968	4.21102	3.91005	0.713517	4.32557	0.982269	0.764106	1.80623	2.70289
PF3D7_0114000	exported protein family 1	EPF1	6.20629	7.23726	11.1516	3.60816	5.68991	5.06436	2.05015	4.15354	4.53025	3.47546	2.34514	1.33123	5.78979	5.65492	3.68833	8.29437	9.08341	9.93951	19.6983	10.7263	10.6356	12.1476	7.50761	12.4652	12.5262	20.3349	10.7226	19.6569	11.1019	15.9251	7.37438	12.3322	7.12178	12.0515	2.99876	7.54082	0.832436	3.1841	1.17872	4.20258	2.2879	5.44673
PF3D7_0114100	Pfmc-2TM Maurer's cleft two transmembrane protein	MC-2TM	1.90711	1.6828	1.77455	4.65991	5.4875	8.23041	15.7363	12.4847	15.4334	18.4901	16.8914	24.7931	0.344423	0.449935	0.419233	0.455133	4.41358	0.910318	0	0	0	0	1.38515	1.56806	7.9732	1.86507	7.26553	0.881131	16.841	16.0053	27.931	19.4177	42.1616	28.9278	77.1633	23.7032	17.4098	34.4165	10.8374	40.1255	3.64074	17.2045
PF3D7_0114300	exported protein family 4, pseudogene	EPF4	0	0	0	0	0	0	0.551731	2.11138	0.875743	1.66122	0.847028	0.22557	0.247554	0	0.301324	0.654254	0	0.327146	0	0	0	0	0.248894	0	0.409338	0	0	0	0.949372	1.0956	0.836474	0	0	0.928208	0.875701	1.06479	0.544056	1.92398	0.299592	0.291316	0.550901	1.12416
PF3D7_0114500	NA	NA	203.228	207.906	235.328	231.046	392.851	377.32	101.797	63.1513	53.8595	76.6256	116.396	157.371	4.28202	3.72919	4.3434	113.168	3.6581	5.65874	9.46067	4.8574	15.9178	10.0136	185.841	217.042	664.382	342.787	753.191	397.104	804.657	608.799	1197.69	1192.49	1111.4	1234.13	644.6	712.163	129.397	306.648	88.0963	259.507	84.1738	186.887
PF3D7_0114600	NA	NA	0.200198	0.463712	0.869323	0.244587	1.2097	1.76397	1.41017	1.34913	0	0.970498	0.577314	0.922459	0	0	0	0	0	0.167231	0	0	0	0	0.50892	0.230449	1.67397	0.959352	1.77963	0.647476	3.39711	0.840077	3.42073	2.4287	2.79531	3.03669	2.98429	4.35442	0.278112	1.405	0.612584	0.595661	0.563222	1.72395
PF3D7_0114800	NA	NA	0.89093	0.458584	0.322391	0.362823	0.598164	0.373814	0.418374	0.400262	0	0	0	1.02629	0	0	0	0	0	0	0.382842	0	0.523363	0	0.377469	0.341852	0.620798	0.609906	0.719979	0.720356	2.15971	2.07697	4.65148	4.9538	2.0733	4.22312	2.21346	3.87564	0	2.0842	0	0.883611	0	1.70488
PF3D7_0115200	rifin	RIF	0	0	0	0	0	0	0.717698	0.686629	0.253151	0.411607	0	0.391233	0	0	0	0	0	0.709259	0	0.547938	0	0	0.215843	0	0.177491	0.116251	0	0	0.205826	0.950115	2.41799	1.03006	0.592773	0.80495	1.51883	1.10808	0.47181	0.953423	0.129904	0	0.119437	0.974878
PF3D7_0115400	NA	NA	0.622471	0.801003	0.900987	0.760487	3.34338	2.35057	10.5231	16.2199	5.87695	7.54386	6.28259	4.54128	0.524618	1.71333	0.319283	0	0.672267	0.173322	0	0	0	0.245366	1.05491	0.238843	1.08434	1.70451	1.5091	1.50988	4.27532	6.09473	15.9539	7.86613	18.3485	11.409	8.66036	13.9904	0.864725	7.2809	2.85704	7.71697	2.62681	8.13958
PF3D7_0115600	rifin	RIF	3.46291	1.27317	4.65431	3.2234	13.6177	12.869	20.6754	14.0018	9.58708	24.1814	14.979	17.0958	0.208467	0.816986	1.01499	1.65285	1.33569	1.5152	0.212578	0.532077	0	0.195002	4.19189	3.2269	5.68765	5.07987	6.92948	4.39986	20.9861	18.4522	43.6728	36.7588	51.9971	36.8938	31.7096	28.3347	12.5992	18.9794	11.353	23.7959	6.1469	11.8332
PF3D7_0115700	erythrocyte membrane protein 1, PfEMP1	VAR	0.284311	0.373171	0.586418	0.451553	0.143163	0.143148	0.801061	1.18789	0.93243	0.861405	0.532915	0.360257	1.9409	1.73727	1.39998	0.237479	2.21079	1.97119	0.256559	0	0.125261	0.168105	0.216822	0.0654543	0.118864	0.0973156	0	0.0459755	0.24122	0.0795354	0.283379	0.172455	0.430056	0.431254	0.127144	0.525632	0	0.0399062	0.41323	0.211481	0.399928	0.380839
PF3D7_0200100	erythrocyte membrane protein 1, PfEMP1	VAR	0.43922	1.4695	0.913881	0.894342	0.552917	0.691075	10.2612	8.04101	5.12896	3.94789	3.95807	2.90922	10.1798	13.9632	5.40693	2.75154	10.8509	11.496	0.754949	0.314936	0.483775	0.476114	0.279133	0.800516	0.19128	0.476073	0.532415	0.858228	2.79488	2.55981	5.42015	3.94078	5.36612	3.71283	0.818413	5.21449	0.254232	1.38711	1.37196	0.490064	0.514861	7.63445
PF3D7_0200200	rifin	RIF	0	1.01094	0.406117	1.82819	1.69539	1.88358	2.89864	3.52948	1.9519	2.4936	2.9667	4.95581	0	0	0	0.31248	0	0.312497	0	0.402366	0	0	0.950997	1.29189	0.78202	0.896349	3.0232	1.05867	6.57475	5.75599	11.4526	8.79316	10.447	10.4624	6.4131	8.34033	0.259848	4.4633	1.57398	2.78272	0.526234	2.50558
PF3D7_0200400	NA	NA	0	0.634499	0.223031	0	0.620717	0.775817	4.05205	6.09186	4.59406	4.73078	3.25851	2.12997	0	0	0.316143	0	0	0	0.529702	0.220972	0	0	0	0	1.07367	0.28129	0.996168	0.664459	0.996062	3.16108	7.60597	6.85411	7.17158	5.25883	3.36882	6.47952	2.56866	5.19068	2.04312	5.50157	2.02298	4.12805
PF3D7_0200500	rifin	RIF	0	0	0	0.619048	0.170098	1.063	0.237943	0	0	0.409388	0.24353	0.583685	0	0	0	0	0.273618	0.564348	0	0	0	0.199732	0	0	0	0.231249	0.272984	0.40969	0.614149	0	0.961983	2.04901	0.589578	1.4411	1.0071	0.367367	0.234633	0.711212	0.129204	1.00508	0.237586	0.484811
PF3D7_0200600	rifin	RIF	0	0	0	0	0.335672	0.209773	0.939116	0.224615	0	0.605916	0.961166	0.383949	0	0	0	0	0	0.278422	0.214839	0	0	0	0.635473	0	0	0.114087	0.673385	0.134747	1.81795	1.16553	0.474595	0.25272	0.77565	1.89591	1.73898	0.543723	0	1.40351	0.764916	0.495856	0.468852	0.318909
PF3D7_0200700	rifin	RIF	0.946557	0.730824	0.205512	1.38772	1.33457	4.05097	6.66744	5.8685	3.95099	10.3244	3.82143	6.76029	0.717982	0	0.29131	0	0.306684	0.158137	0.244047	0	0	0.447738	0.481245	0.435835	0.989338	0.777584	2.2948	0.306133	3.90074	3.44237	14.5562	10.909	19.1639	14.7167	15.8032	10.0882	3.68183	9.03447	2.02745	8.73067	3.59501	4.70945
PF3D7_0200900	NA	NA	0	0	0	0.256898	1.48236	0.26468	3.55477	1.98385	2.82119	2.29353	1.51593	0.726669	0	0.69453	0	0	0.340645	0.351297	0	0	0	0	0.534537	0	0.219779	0.287897	0.339856	0.170017	0.764595	1.17648	4.19173	2.55095	1.95734	2.79085	2.5076	1.1434	0.584222	1.18058	0.804274	0	1.18314	0.804765
PF3D7_0201000	rifin	RIF	0	0	0	0	0.201617	0	0.56407	0.539651	0	0	0	0.230615	0.253091	0	0	0	0	0.167231	0.258082	0.215324	0	0	0	0.460899	0.209247	0	0	0.485607	0.970604	0.280026	2.28048	1.21435	0.232943	0.56938	0.895286	0.870884	0	0.281001	0	0	0.281611	0
PF3D7_0201200	rifin	RIF	0.175524	0.13552	0.38109	0	1.06061	0.88375	1.97819	0.709708	1.3083	0.212721	0.50616	1.81973	0	0	0	0.293223	0	0.14662	0	0.755141	0.309327	0	0.223098	0.202047	0.550371	0.480635	0.425534	0.283838	1.48921	1.9641	3.7489	1.59702	3.88042	2.32962	3.66306	1.90887	0.731504	1.47821	0.268542	1.04449	0.493805	1.00765
PF3D7_0201300	NA	NA	0.204778	0	0.444605	0	0.412459	0	1.73092	1.37999	0.61054	1.48905	0.29526	0.707671	0	0	0	0	0	0	0	0	0	0	0	0.471442	0.214033	0.280371	0.330971	0.331144	0.744605	2.57788	2.04107	1.55266	2.62099	1.55308	1.52628	2.44972	0	0	0	1.21857	0.43208	1.17559
PF3D7_0201400	NA	NA	0	0.308157	0.433277	0	0	0	0	0.537932	0	0	0	0	0	0	0	1.33351	0	0	0	0	0	0	0	0	0	0.546455	0.967615	0.322707	0	0.558268	1.70492	2.42096	2.78641	4.16215	0.594956	2.60433	0	0	0.91595	0	0	0
PF3D7_0201500	NA	NA	132.205	129.774	141.651	75.3548	131.904	123.416	144.012	156.325	135.173	101.255	85.3892	58.8782	112.458	126.211	86.5922	79.6394	115.445	102.839	12.9881	2.3787	10.8264	8.71772	69.9635	50.0672	121.999	135.419	174.157	131.332	338.944	294.223	474.461	519.831	385.714	544.199	177.292	324.431	63.8359	97.6108	65.0408	123.198	89.1812	169.52
PF3D7_0201600	PHISTb domain-containing RESA-like protein 1	RLP1	448.305	441.498	488.769	291.573	519.263	425.209	110.074	111.217	79.9581	60.7844	65.6243	64.6077	27.3838	41.9476	19.4434	227.454	21.9317	23.3714	192.309	111.079	140.537	165.735	262.373	317.167	630.55	647.776	762.808	667.923	640.416	664.574	447.772	577.763	343.702	556.894	174.131	331.899	61.2567	99.8975	51.1896	101.277	46.7019	130.643
PF3D7_0201700	NA	NA	37.5555	44.8366	36.8435	25.2353	32.6388	22.4981	1.95953	1.5935	0.622059	1.01143	1.3036	1.44205	0.967137	0.80399	0.749129	38.5727	1.23933	1.1038	60.1588	75.7742	48.29	64.7249	52.066	51.9565	21.7345	30.899	27.6517	34.2453	18.0391	25.2924	5.24847	6.22236	3.07505	5.99987	4.04319	3.93299	1.25598	3.22137	0.585219	1.86235	0.391317	2.26245
PF3D7_0201800	knob associated heat shock protein 40	KAHsp40	761.448	830.724	798.885	633.852	767.594	672.304	179.064	170.312	116.212	138.206	88.6368	102.8	27.7824	41.1978	18.7363	391.684	21.1684	28.0322	529.278	525.915	442.504	569.626	535.629	408.513	606.985	761.366	787.537	769.82	758.598	783.225	583.973	696.459	512.105	689.495	319.624	440.692	115.515	243.018	84.1698	204.335	77.074	215.667
PF3D7_0201900	erythrocyte membrane protein 3	EMP3	184.42	265.261	322.518	29.9075	90.0595	64.0817	104.761	112.434	63.5756	28.3614	17.4632	5.76395	25.2055	44.157	8.80527	73.045	33.3802	36.6317	27.125	1.18675	8.97637	7.40399	78.3414	130.379	224.965	203.698	220.325	221.187	563.465	555.607	612.693	711.971	466.637	702.427	46.9336	422.721	4.27759	17.2881	8.75466	30.5392	13.8064	139.674
PF3D7_0202000	knob-associated histidine-rich protein	KAHRP	36630.2	34150.5	33752.5	46748.3	38053.5	40636.5	4220.17	4169.64	4798.55	5501.41	5269.66	6106.85	2982.08	2383.63	2828.23	21302.6	2691.86	2999.47	27505.3	26183.2	29303.3	24267.9	38493.4	36696.5	48923.1	42892.1	37554.4	40522.7	34501.2	37322.6	16734.2	24782.4	17285.3	26554.5	16214.2	16751	7638.78	12379	5972.74	13363.8	5875.39	8797.09
PF3D7_0202100	liver stage associated protein 2	LSAP2	4.96333	8.94162	6.95961	6.82179	3.74889	5.72688	23.0161	20.9048	18.8058	24.0607	19.3819	26.4431	18.0396	24.5905	27.3678	27.6385	53.9389	49.4066	34.6579	90.974	29.3386	47.9331	17.3486	23.0913	3.02613	7.36181	7.18633	8.02614	7.01846	8.67803	7.95065	8.15378	10.8284	7.25411	22.8126	9.67097	22.6959	24.6733	17.2438	14.7677	14.3998	14.0489
PF3D7_0202200	EMP1-trafficking protein	PTP1	257.754	252.045	261.345	219.407	243.534	221.446	8.19064	4.35337	4.49408	3.91451	2.79432	5.45709	2.1778	3.9118	0.994058	208.282	2.79071	5.57609	459.694	569.279	410.411	514.885	296.962	268.445	153.045	237.038	193.853	260.638	134.674	154.514	22.6892	37.552	18.7915	31.2337	17.6545	28.8042	3.58965	4.83592	3.95338	2.24243	1.81741	8.0352
PF3D7_0202300	NA	NA	3.50721	3.24944	1.26911	1.42828	2.59018	6.7691	15.152	15.4415	24.7474	24.6526	16.8563	28.5498	0.886761	3.0891	1.79895	0	0.757554	1.36718	0.301416	0.502958	0	1.10598	0.594373	0.538289	2.19943	0.480187	1.8895	1.13429	7.36826	6.86795	26.634	17.7281	23.941	19.9495	18.124	27.4621	6.82101	19.0347	3.2195	20.5225	3.28896	19.2393
PF3D7_0202400	translation-enhancing factor	PTEF	259.735	409.755	455.702	14.6951	55.6478	39.3382	192.389	220.023	238.973	97.9028	117.386	15.4288	316.139	388.264	149.444	146.623	517.517	378.074	153.298	4.46296	12.3111	14.286	88.0579	157.14	90.4731	46.3845	82.0064	149.872	400.439	441.767	201.109	196.736	184.447	227.413	35.2336	256.25	5.54545	22.191	13.1389	54.0729	65.0553	208.209
PF3D7_0202500	early transcribed membrane protein 2	ETRAMP2	16620.7	16742.4	16627.9	18850.6	14165.9	15936.4	500.786	415.962	481.904	488.297	501.567	497.182	325.013	304.652	650.634	10343.8	4315.69	4255.95	22932.3	18688.3	23787.3	24139.5	17782.6	25044.2	18340.2	17040.8	14697.5	17032	10007.6	10947.8	3168.7	4672.99	2877.6	5390.89	2100.37	3390.77	546.7	745.547	542.514	1065.51	653.256	755.881
PF3D7_0202600	NA	NA	3.64206	6.66945	7.40058	1.48319	2.96252	3.46767	18.0895	16.6142	15.3135	10.865	8.81952	6.34689	21.2506	21.8999	16.7412	5.30424	23.071	18.9559	3.73199	3.01325	1.6046	1.60128	2.78939	2.47244	3.46504	4.28328	4.0375	3.43556	10.7529	8.62112	14.3609	12.6744	14.3975	12.4388	5.15067	12.6442	2.01082	3.67018	2.71463	3.89	3.41542	14.743
PF3D7_0202700	octaprenyl pyrophosphate synthase	OPP	0.465025	1.7952	1.00964	0.426098	1.05372	0.585341	7.53383	7.20769	11.9582	12.9622	9.21935	9.7761	20.7229	10.5597	15.5637	2.33055	18.4568	13.3043	0.299739	0.12504	0	0.412434	0.886597	0.133823	0.607552	0.318343	0.469745	0.0939982	4.08635	2.76441	6.62144	5.81773	8.65735	6.94347	5.02567	9.48237	2.42251	6.03761	3.29051	5.18855	4.25186	14.9053
PF3D7_0202800	NA	NA	0	0.399839	1.12437	0	0	0	6.56605	6.2818	6.94804	6.90377	8.2136	10.7379	20.2954	9.40772	23.1098	8.6513	25.1683	22.0621	0	0	0	0	0	0	0	0	0	0	1.25537	0	1.47478	0	1.20514	0.490953	11.5795	1.12639	15.8271	0.726886	10.6962	6.93379	7.64888	7.43244
PF3D7_0202900	palmitoyltransferase DHHC12, putative	DHHC12	0	0	0	0	0.219119	0	3.06517	4.10547	4.21654	2.37317	4.392	1.25317	7.42663	6.10849	4.35245	0.726949	11.9841	9.26913	0	0	0	0	0	0	0	0	0	0	0.263714	0.608667	1.85883	0.329941	2.27847	0.412537	0.648668	1.1831	0	1.22157	2.4966	1.61842	1.53028	5.4126
PF3D7_0203000	repetitive organellar protein, putative	ROPE	0.601303	0.806343	0.790184	0.115993	0.414334	0.159343	7.04432	9.42658	9.62433	7.67086	10.2214	4.1195	27.8461	20.2789	19.3821	5.18117	46.1932	34.0232	0.73436	0.170193	0.195204	0.112274	0.241351	0.510015	0	0.238315	0.0767251	0.204707	1.64941	1.0624	2.38832	1.48773	2.3199	1.80016	3.72689	6.71141	1.7146	3.4204	1.71887	8.85128	11.0848	15.1704
PF3D7_0203100	NA	NA	0.604944	0.973061	0.62935	0.246358	0.253847	0.253821	3.40892	3.90682	4.2836	2.59655	1.70814	1.33564	2.99535	3.28854	2.67628	0.88427	12.4542	9.15903	0.357432	0.135552	0.288734	0.327879	0.352416	0.348177	0.474214	0.29334	0.38702	0.366842	1.22204	0.95193	1.5074	1.33781	1.64241	1.40986	1.50295	3.42652	0.805361	1.23828	0.694147	1.72493	2.03873	3.83461
PF3D7_0203200	NA	NA	3.57717	5.90472	4.28501	6.9322	7.57772	5.58955	2.78037	3.82376	5.70037	6.87659	9.9598	12.0778	7.32916	4.27792	10.4396	3.70916	6.5943	5.1519	6.67863	16.0531	3.69548	8.31444	6.27134	5.3956	2.70744	3.88435	2.49205	3.09176	7.17635	3.79578	4.74222	5.05043	7.17629	9.93986	13.6067	7.51223	12.1663	16.7942	4.62363	8.07426	6.15969	7.43536
PF3D7_0203300	ERCC1 nucleotide excision repair protein, putative	ERCC1	5.15737	2.58826	5.03885	5.67079	1.55818	5.1934	9.08198	10.4266	16.1454	16.8759	27.1421	40.3984	26.7318	19.5897	48.807	8.18491	17.5453	24.3407	2.65941	11.9261	6.3622	6.7087	6.55522	6.23352	4.85142	3.70712	3.12584	4.16996	5.93846	4.3283	5.14047	7.82081	6.30096	9.28971	38.0552	13.7415	64.839	48.8629	26.0386	33.759	38.9938	15.7906
PF3D7_0203400	NA	NA	7.49221	6.83639	11.091	7.48914	17.8344	12.86	661.117	626.989	604.136	531.59	986.971	1089.01	1224.42	1436.42	1452.64	721.386	985.331	898.939	4.39019	8.05826	5.40145	5.63809	7.79145	6.27223	11.3903	5.59522	11.0084	7.15919	35.4983	35.2498	149.353	80.5629	149.785	67.7995	616.291	234.81	1311.41	839.38	1286.94	712.33	1170.31	677.752
PF3D7_0203600	NA	NA	0	0.0760701	0	0	0	0	2.9148	2.78862	1.61563	1.67167	4.11972	2.49688	5.23133	3.09153	5.60955	1.15215	4.6287	4.60884	0	0.105969	0	0	0	0	0	0	0	0	0	0.413434	0.140289	1.19526	0.917121	0	1.32181	0.750042	0.13687	0.968039	1.58275	0.293148	0.277183	2.35672
PF3D7_0203700	protein MAK16, putative	MAK16	268.45	372.091	368.26	155.547	203.661	150.22	341.672	345.499	279.813	270.8	161.397	109.258	113.425	151.464	65.5242	191.042	121.123	112.181	331.747	168.95	164.264	230.049	234.413	173.769	122.802	148.676	121.648	150.613	350.232	368.919	447.742	448.335	459.506	420.697	169.621	374.652	78.9376	171.309	90.7492	204.662	115.689	390.661
PF3D7_0203800	NA	NA	0.1154	0.178197	0.751652	0.422959	0.232436	0	14.7941	14.6203	9.80574	11.608	10.3162	10.7675	17.0689	23.2508	13.6733	9.25354	8.22567	11.4712	0.148765	0	0.101685	0	0	0	0	0.236998	0.186514	0.279917	1.95819	0.968487	2.79338	1.74996	4.02824	1.42223	4.98865	5.39651	7.21401	8.90871	9.97537	8.92724	11.85	19.1017
PF3D7_0203900	NA	NA	3.57759	3.43184	4.35451	3.17878	5.67738	6.0043	58.3422	61.6611	60.2818	59.7809	53.4595	47.3307	53.5882	67.3189	44.7085	20.2841	52.1611	53.6111	0.978299	0.233205	1.33738	1.15382	0.964571	1.62232	3.28604	1.70696	3.32918	3.68154	12.6145	10.6148	29.7928	23.6735	30.9052	19.7332	27.473	40.6758	32.3798	37.2812	46.7737	40.4818	50.7058	76.0329
PF3D7_0204000	condensin-2 complex subunit H2, putative	CAPH2	0.235572	0.363764	0.767194	0.479672	0.632644	0.593043	7.3011	8.36086	10.6523	9.70681	8.60473	5.60816	6.84962	4.79817	6.8874	1.44297	8.26854	6.82168	0.303683	0.337826	0.0691915	0	0.299421	0.180779	0.492437	0.645063	0.824939	1.2698	2.76008	2.5262	4.696	4.28675	4.7511	4.31768	9.48128	6.14857	1.96351	5.62107	4.44508	6.65864	4.80485	8.11421
PF3D7_0204100	NA	NA	2.07418	2.46539	1.59988	0.966948	0.549706	0.618356	14.4565	16.332	19.9763	17.497	27.6243	19.649	121.276	94.8762	103.353	34.6504	174.552	156.642	0.844386	0.557722	0.529062	0.516381	0.416268	0.188495	0.484931	0.504447	0.661653	0.728199	1.62088	2.02323	4.58555	2.77288	4.69984	3.36354	5.65494	8.99322	4.58751	4.32871	12.0672	5.27819	38.5823	23.0054
PF3D7_0204200	translocation protein SEC66, putative	SEC66	203.143	183.567	199.653	187.934	259.943	206.726	166.356	165.557	113.646	95.955	113.834	144.104	129.264	168.116	169.525	202.937	156.483	129.63	145.228	139.416	134.748	170.137	127.664	179.415	262.922	201.63	287.744	234.669	160.125	195.863	183.279	179.754	147.138	171.139	93.0709	138.261	66.6224	91.1284	129.095	84.1345	68.2561	152.16
PF3D7_0204300	NA	NA	16.9916	19.4355	19.2264	9.88523	12.1323	9.73203	28.4968	33.3217	41.4125	28.6551	32.277	23.612	33.7554	21.5284	18.1227	17.1214	35.0996	26.5847	30.0171	22.9167	14.18	17.0102	17.369	19.9731	9.30261	13.0475	9.00887	13.375	34.2155	27.6651	39.2995	26.1756	33.1604	33.4101	21.8444	47.7124	5.4952	16.783	7.90889	17.5207	9.23175	38.6224
PF3D7_0204400	NA	NA	8.12286	13.887	6.29857	9.21503	7.01181	3.65161	18.7997	18.7678	14.7038	16.1727	20.0777	7.35191	16.8704	9.58194	10.7137	5.81559	18.7986	8.23922	12.7153	16.8491	4.08999	4.80282	4.42478	2.67151	1.81928	2.78034	2.81325	5.16033	13.3615	11.3618	13.2184	4.39921	12.827	10.4509	9.51379	15.7747	1.61202	6.51505	1.77536	1.72631	4.8969	18.3196
PF3D7_0204500	aspartate transaminase	AspAT	32.4114	27.5269	35.5202	23.193	25.3358	21.1757	43.921	43.0597	40.9543	37.7837	26.2592	32.3576	45.6573	46.6447	30.6371	31.4558	31.0037	36.2278	33.824	28.3862	31.4153	32.1224	22.9522	44.0601	23.7134	17.4334	17.711	28.8266	28.4344	30.6552	36.0412	28.5537	35.378	26.3373	17.2552	27.5272	13.5076	22.7465	19.2447	14.0061	25.6183	32.4879
PF3D7_0204600	NA	NA	2.10806	2.0752	2.91779	1.4165	4.40523	2.98517	12.8443	14.6323	13.2773	14.8817	11.3982	9.2884	7.46202	10.1831	7.29867	3.60968	8.28149	6.91161	1.35878	0.680199	0.835885	1.18411	1.80861	1.27397	2.3135	2.4533	2.93865	1.96013	6.51545	6.48699	11.1811	9.03077	12.3869	9.19308	10.7628	15.5322	6.95514	10.5041	5.64412	13.8773	7.89517	13.0096
PF3D7_0204700	hexose transporter	HT1	171.855	158.075	174.035	196.619	206.314	219.287	112.225	108.37	111.91	154.439	137.045	177.383	122.199	105.944	132.32	154.43	99.5021	129.252	146.683	241.426	176.906	174.907	178.06	160.544	182.346	166.15	150.612	166.944	160.322	150.303	140.991	163.138	168.345	162.688	216.781	139.262	97.3915	205.166	145.133	204.163	144.434	170.605
PF3D7_0204800	NA	NA	0.450806	0.232041	0.489385	0.183587	0.908004	0.94574	15.0304	14.1772	18.1449	18.3935	16.0333	21.8105	19.9468	12.9046	24.0481	2.76136	20.6919	18.0754	0	0	0	0	0	0	0	0.308609	0	0.242998	2.36774	2.73243	2.99553	4.10171	4.72086	4.8436	10.752	11.9297	13.5688	21.3028	7.58679	16.7664	10.2518	21.4228
PF3D7_0204900	2-methoxy-6-polyprenyl-1,4-benzoquinol methylase, mitochondrial, putative	COQ5	0.882565	0.953983	1.72457	2.5878	3.19975	3.7771	14.4227	13.5604	11.841	20.7502	22.142	31.5163	27.224	25.9441	30.6926	7.077	21.7322	21.3797	0	0.379698	0.155535	0	0.224355	0	0	0.483343	0.998506	1.28447	2.56732	1.23448	5.0267	4.81806	6.36688	5.52218	16.5767	11.7097	24.0304	29.2352	19.9841	25.9968	20.7325	14.8621
PF3D7_0205000	NA	NA	0.246216	0	0	0.150404	0	0	2.08118	2.32294	3.11987	1.19358	0.710017	0.141812	4.2021	2.0331	1.32606	0.20566	4.18813	3.1879	0.158702	0	0	0	0	0	0	0	0	0	0.447641	0.344393	0.525878	0.560056	1.14595	0.466839	0.367026	2.67767	0.855098	0	0	1.28202	0.779271	5.7717
PF3D7_0205100	NA	NA	0	0.0685277	0	0	0.0893857	0	7.50228	5.62238	3.44012	0.430263	0.63987	0.306724	2.91735	9.38107	1.36577	0.296546	4.45734	2.81735	0	0	0	0	0.225626	0	0.0927679	0	0	0	0.753043	0.248295	0.758277	0.538373	1.23928	0.673148	0.396919	4.44015	0	0.373739	0.339481	0.792246	0.686676	5.85962
PF3D7_0205300	NA	NA	0	0	0	0	0	0	1.85997	1.09504	0.908388	0.246164	0.292867	0.233979	0	0.335446	0.312556	0	0.658102	0.593846	0	0	0.0894892	0	0	0	0	0	0	0	0.123095	0	0.144609	0.308016	0	0.192562	0.151391	0.331345	1.12867	0.712749	0.31076	1.05761	0.214289	0.583031
PF3D7_0205400	NA	NA	24.2166	28.2044	28.0713	13.3722	17.0855	16.8771	36.0432	43.3341	65.4704	58.0339	48.7257	45.5474	58.4617	32.7627	42.3169	15.7707	56.2972	43.7718	34.2167	32.6681	25.0757	27.181	16.8683	21.7337	16.445	21.1674	19.4594	20.1333	32.005	30.0453	44.612	32.9883	34.8636	39.9494	36.9146	56.5409	21.4772	34.1827	29.8284	42.9468	33.6796	69.7729
PF3D7_0205500	NA	NA	127.209	115.313	88.483	124.907	108.657	103.783	137.393	140.336	135.554	135.895	139.94	172.587	136.992	150.948	144.273	124.358	90.8268	89.7314	104.467	192.054	127.451	162.687	131.745	105.213	105.382	105.79	123.741	140.567	119.35	97.5332	119.412	117.171	103.611	107.197	124.31	131.682	125.01	150.777	139.119	107.94	115.979	131.18
PF3D7_0205600	NA	NA	2.95576	3.11887	3.31566	2.28704	3.47283	4.21657	18.4604	20.0515	35.1032	29.6124	31.6792	25.0823	42.8471	29.939	35.7798	10.2047	48.362	39.2575	5.96956	3.28504	2.60447	3.3788	1.75321	2.83533	3.81019	4.72134	4.93646	6.53228	7.76216	6.75276	12.3454	10.4585	14.2154	11.9558	14.8337	20.7869	12.8657	9.81868	21.1033	12.3122	18.6406	24.3214
PF3D7_0205700	NA	NA	44.6784	45.1263	49.4169	44.2856	52.9187	42.7975	14.251	17.4213	15.9178	21.1138	23.0938	31.7214	35.1682	27.8435	35.0238	35.2065	35.0513	38.9641	50.3514	101.246	57.6908	57.8184	47.859	56.6048	46.4039	39.8189	48.3678	44.5307	56.5366	50.7022	34.0091	46.02	30.0799	44.221	45.6569	38.5044	30.4476	27.2142	15.4767	38.8769	20.9491	20.1642
PF3D7_0205800	PH domain-containing protein, putative	PH1	7.25016	4.79807	7.87061	6.9596	17.2108	14.3409	24.0755	27.2211	30.1082	15.0628	34.3478	23.2654	118.499	85.5248	108.377	33.7401	101.512	99.9281	8.0112	1.11399	0.912642	4.89921	1.31646	2.98061	7.03656	6.02681	8.78851	10.468	13.1814	14.4873	22.859	7.06782	16.2694	10.801	18.5272	10.7007	9.35237	5.81509	20.6	6.16337	29.5028	14.3694
PF3D7_0205900	26S proteasome regulatory subunit RPN1, putative	RPN1	72.7062	73.8467	74.4964	73.0722	92.1469	86.7867	207.136	209.348	204.793	231.201	283.195	325.53	370.118	329.29	387.988	185.113	329.101	363.588	69.5857	83.2871	63.0374	58.6981	76.6809	69.7437	67.4583	71.2432	74.8843	77.2288	112.707	100.791	150.121	139.832	156.68	135.95	159.093	151.304	163.026	187.549	215.781	139.301	208.42	216.508
PF3D7_0206000	DNA repair protein RAD2, putative	RAD2	7.76564	7.8455	9.05798	3.07837	4.99193	4.83543	13.6751	14.6976	13.547	12.7654	8.57636	4.80582	11.8017	12.279	10.3606	9.03966	12.2457	11.766	12.3539	5.95327	7.06109	6.59432	7.45533	7.36998	4.79226	6.07963	6.00853	6.17866	13.3175	12.8265	13.0572	10.9618	12.8808	11.9829	9.66716	16.4414	2.00838	8.81272	3.25463	8.97183	4.96792	14.7022
PF3D7_0206100	cysteine desulfuration protein SufE	SufE	37.5973	45.6713	42.1752	29.3974	37.1065	31.8654	71.6808	73.645	47.8272	46.4762	38.6696	35.8025	39.9255	76.1649	34.3268	49.4093	41.011	34.9653	38.7742	42.5945	28.9326	38.8287	30.9026	34.9113	22.006	28.9982	32.2061	32.223	35.2407	35.7604	55.3188	41.0499	39.0803	28.5145	36.9896	45.2494	44.2209	51.3647	32.2121	52.2037	34.9051	55.3984
PF3D7_0206200	pantothenate transporter	PAT	2.1035	3.24817	3.24499	2.70515	4.45981	4.73806	6.70655	6.267	4.45608	7.64782	7.98141	8.41703	11.3368	16.638	18.9099	5.3635	25.6471	29.9633	1.4272	1.78612	1.56084	2.48748	3.65865	1.40183	2.08285	1.59157	2.77349	1.16368	1.47606	3.0971	3.31043	4.02924	4.50864	3.46356	3.63071	1.80601	7.99744	6.99275	5.92832	7.74096	14.8724	7.309
PF3D7_0206300	pentafunctional AROM polypeptide, putative, pseudogene	AROM	11.5027	15.3486	15.3704	1.57255	4.81476	3.96045	26.509	30.3455	29.7568	20.5763	13.3153	3.83624	19.4234	21.1559	11.6639	9.69329	21.1829	18.5855	12.8004	1.31848	3.96063	3.88986	5.86892	9.43085	5.14643	4.64353	5.33298	8.68921	19.2908	19.2328	25.6297	22.7101	24.5335	22.1002	9.19767	31.8625	3.86002	11.2415	4.45432	20.1214	12.9903	37.2397
PF3D7_0206500	NA	NA	15.0441	13.6018	15.7162	7.7781	9.44179	7.73927	18.1223	21.2755	18.9815	19.5535	18.6106	14.8685	26.8468	19.2999	26.6389	15.3707	21.1219	20.8718	17.2015	13.0853	14.8315	13.8713	13.9671	15.0586	10.1637	11.7615	10.3603	12.9395	21.8811	20.067	24.2153	26.252	24.1007	27.0362	21.3207	26.2723	6.60288	18.4843	11.0413	16.6072	16.8989	23.2393
PF3D7_0206600	NA	NA	5.85627	2.71293	4.4502	5.00831	2.94889	2.94859	3.30007	7.10372	10.4762	12.0655	10.1327	11.4682	5.92279	1.9343	0.901155	2.93497	2.84614	1.46757	3.77475	19.526	11.8686	4.15517	3.72177	12.8083	5.50885	2.80633	4.25932	2.36752	3.54905	2.45742	4.16934	10.6568	2.04424	3.88633	11.3487	7.64261	7.32188	2.46598	4.03189	5.22734	2.05944	4.48262
PF3D7_0206700	adenylosuccinate lyase	ADSL	15.4	17.2202	15.9973	16.5438	22.1942	26.5701	39.0887	36.6808	41.1649	52.1293	43.452	51.3841	27.3568	29.8177	29.8259	21.291	28.174	22.8447	24.6446	38.4102	21.9924	27.3167	17.0429	20.1721	21.2301	17.9948	20.4914	22.4343	24.7802	17.8267	28.7331	24.1584	30.4311	22.277	33.4449	41.4366	23.4221	37.082	35.2402	20.9352	22.5963	33.2801
PF3D7_0206800	merozoite surface protein 2	MSP2	172.149	203.092	163.458	158.159	69.1164	105.166	57.2345	65.5843	94.4391	91.2411	587.769	603.107	6360.02	4163.28	7548.94	2145	16292.5	18630.4	202.689	251.811	218.837	209.545	107.362	99.3448	42.2233	57.667	29.6783	51.0362	37.0012	31.1424	26.7999	26.8013	24.5708	24.8066	86.2229	16.2254	321.093	24.4851	563.804	31.4151	6709.29	147.581
PF3D7_0206900	merozoite surface protein 5	MSP5	5.15338	8.1307	5.59439	3.55861	6.0925	3.38437	49.5571	66.1348	41.4177	27.4258	32.3062	19.0995	46.7373	88.8071	47.9245	32.5646	127.768	108.929	4.91032	2.40988	3.35633	5.82913	1.99352	1.03167	1.63931	3.0677	3.62135	3.44208	8.69032	9.08866	26.48	19.367	24.5065	13.3821	21.3759	31.9209	14.6292	23.2725	19.3681	24.6663	32.7783	42.6616
PF3D7_0207000	merozoite surface protein 4	MSP4	66.1051	81.8748	60.051	60.0107	41.8397	45.0713	457.552	501.473	763.04	672.346	1237.76	1242.97	2483.01	1936.65	2800.17	895.729	3745.91	3335.78	28.406	29.8716	23.259	27.4145	15.7541	13.7392	11.0356	8.32793	7.79054	11.3208	66.769	44.6267	127.136	79.7078	173.865	87.6935	483.464	278.078	829.038	418.181	916.379	409.763	1856.03	604.381
PF3D7_0207100	NA	NA	2.79934	3.43596	2.02593	1.18385	1.9156	1.53593	29.5267	28.1518	24.5569	28.7499	27.8397	29.6006	54.4449	52.3352	54.7836	23.0226	69.0121	56.0007	1.29543	0.84921	0.790591	0.976125	0.547395	0.578368	0.487643	0.761626	0.928083	0.78348	4.48043	3.76495	9.65826	7.12944	10.9408	5.81804	20.2759	14.4021	38.2397	25.4893	23.281	26.9091	42.9615	30.5612
PF3D7_0207200	iron-sulfur assembly protein, putative	ISCA1	0.389206	0	0	0.475501	0	0	6.03134	8.91764	9.28324	8.01867	6.17296	4.03504	5.9044	8.35593	6.58795	2.60076	10.7187	7.80273	0	0	0.342949	0	0.494695	0	0.406796	0	0	0	0.471738	1.0888	6.65023	2.36082	4.52864	4.05875	13.9242	8.88869	14.0576	9.28699	5.65689	6.36913	6.8435	7.44782
PF3D7_0207300	serine repeat antigen 8	SERA8	0.368601	0.284592	0.200072	0	0.0928033	0	0	0	0	0	0	0	0.349488	0.608735	0.141799	0	0.447848	0.384877	0.237587	0	0.568388	0	0	0	0	0	0	0.0745074	0	0	0	0	0	0	0	0	0	0	0	0	0	0
PF3D7_0207400	serine repeat antigen 7	SERA7	1.58806	1.94135	1.43663	0.485041	0.466467	0.499734	38.4056	37.9023	43.1059	39.0533	121.929	121.879	361.372	343.129	379.483	142.817	365.423	367.453	1.87661	1.42337	1.51593	1.56495	0.588724	0.609341	0.345798	0.317082	0.588198	0.160502	1.20301	0.55532	3.95713	1.30443	4.46552	1.44279	31.1689	3.95783	39.7098	5.57254	59.7792	7.18599	155.532	33.6811
PF3D7_0207500	serine repeat antigen 6	SERA6	2.36804	2.53154	2.43886	1.78036	1.03954	0.76429	34.9857	32.5709	33.9435	34.4386	117.227	150.1	371.37	343.446	462.31	161.484	383.425	370.055	0.782748	2.22042	1.07006	1.00524	1.15764	0.698941	1.07888	0.789765	0.637889	0.392752	0.588758	0.424651	1.8156	0.736611	3.81512	0.518069	34.304	3.16961	57.2735	10.3976	82.4459	8.12974	215.535	50.9501
PF3D7_0207600	serine repeat antigen 5	SERA5	15.7597	16.9187	11.6555	10.2023	8.28349	4.03067	128.435	115.428	170.726	177.298	1022.91	1087.08	3285.46	2537.35	4221.19	1253.55	4248.56	4077.32	10.6033	12.6959	10.5118	10.2464	6.54406	4.98699	4.92191	4.77108	2.89218	4.01056	1.97865	2.28342	8.40386	3.71332	12.712	2.85717	199.264	8.33055	185.437	33.7536	527.042	27.5553	1528.75	225.402
PF3D7_0207700	serine repeat antigen 4	SERA4	2.40758	1.45694	1.90723	1.11296	0.786371	0.16381	19.8921	23.3283	35.1146	34.3826	162.029	210.926	444.538	320.879	630.608	178.055	507.561	521.422	1.59378	2.09958	1.14673	1.46201	0.661649	1.12353	0.544084	0.668173	0.525842	0.683951	0.552075	0.364063	2.3163	0.690717	2.27137	0.55519	21.3393	1.203	14.9149	3.9273	96.417	3.5817	155.648	32.3744
PF3D7_0207800	serine repeat antigen 3	SERA3	3.02878	3.42977	2.63038	1.97351	1.6268	1.18609	21.2396	20.4108	25.7863	27.489	102.092	106.762	310.828	277.775	396.466	126.719	407.903	400.193	3.21036	4.85022	4.38872	5.41229	4.0208	3.25402	1.8994	3.04101	0.979048	1.95912	2.2842	1.41216	2.10841	0.816523	3.13259	1.33997	23.3771	3.29388	45.5348	7.84116	58.4896	5.40702	189.449	23.5698
PF3D7_0207900	serine repeat antigen 2	SERA2	0.16997	0.568669	0.307525	0.692185	0.0570581	0.641838	8.22108	6.94885	11.4021	10.8488	16.5015	16.6424	38.7492	30.7835	43.4168	12.3042	35.2448	41.2215	0.438225	0.487496	0.399384	0.267995	0.216038	0.326088	0.0592171	0.193927	0.183141	0.183237	0.480695	0.0792478	0.564708	0.515495	1.64808	0.322271	6.84092	2.83431	14.0097	5.40761	16.9028	8.51295	41.0437	14.5822
PF3D7_0208000	serine repeat antigen 1	SERA1	0.62977	1.55596	0.888763	0.846344	0.317117	0.237813	1.06465	1.35808	1.50211	1.75543	7.17349	8.85051	27.945	28.7054	32.658	10.8363	40.7069	35.1936	0.162371	0.203205	0.443938	0.223419	0.400231	0.144986	0.19747	0.172449	0.101786	0	0.228994	0.0880885	0.0896723	0.191001	0.0732775	0	1.87755	0.136978	4.5493	1.23753	2.93871	0.562137	13.9968	3.07307
PF3D7_0208100	NA	NA	0.560108	1.35141	0.684046	0.128306	1.33969	0.616897	105.094	115.737	120.08	90.6207	127.802	53.9554	278.456	259.869	202.166	85.6744	321.096	256.044	0.902565	0.263561	0.462694	0.455367	0.667424	0.362668	0.3293	0.407399	0.763822	0.934048	12.6866	9.84205	30.5056	16.0849	32.2601	16.4277	41.6423	50.9387	19.2578	31.3978	37.3302	49.9435	104.788	109.326
PF3D7_0208200	KRR1 small subunit processome component, putative	KRR1	142.603	156.554	171.756	113.435	126.632	121.588	160.717	189.393	198.928	185.691	153.084	130.696	97.9032	109.33	71.7571	132.851	85.6615	83.8189	203.425	200.622	124.188	167.157	129.392	156.004	121.632	116.861	145.859	144.084	186.216	203.25	216.094	199.516	187.728	195.978	154.232	202.629	78.6622	123.894	99.373	147.729	90.1941	157.556
PF3D7_0208300	NA	NA	3.37117	3.75667	4.26332	2.12301	2.34505	2.66853	4.74923	5.19941	6.00991	6.65488	5.21151	3.20277	4.21789	4.07511	3.52965	3.59967	3.60332	3.57084	6.81004	3.51373	4.53233	3.49337	3.79898	5.00074	1.96156	4.21116	2.7524	3.40015	6.61348	6.41683	5.49299	5.16486	6.22757	5.66706	4.50722	8.84432	3.37961	4.43913	2.23323	4.705	3.59323	6.08528
PF3D7_0208400	NA	NA	21.469	28.8214	27.3654	2.8932	10.1359	5.76558	21.1584	22.7622	20.2061	14.3122	12.0856	4.30726	33.2469	29.7436	24.3097	16.2929	43.6134	33.785	25.3465	3.11679	7.30341	6.63258	11.6439	11.7647	5.60169	7.03924	7.65496	11.0349	18.5059	22.7946	14.1534	14.081	13.5598	13.9134	8.59299	21.1455	2.20761	6.21052	2.12143	8.7612	10.7167	27.6669
PF3D7_0208500	acyl carrier protein	ACP	0	0.350584	0.492931	1.1095	1.37188	1.14311	37.7416	42.8396	59.5674	58.8822	77.2555	112.458	116.53	69.7399	111.097	43.2377	77.9732	82.6873	0	1.95352	0	0	0.577145	0	0.949191	0.310846	0	0.367138	4.40288	5.08105	6.4655	10.3286	17.4353	9.03993	32.4898	28.6413	54.8787	40.7899	59.05	54.7167	58.1241	54.307
PF3D7_0208600	ribosome-recycling factor	RRF1	2.26036	3.19952	5.0439	0.613672	5.18508	4.10971	100.66	90.8868	76.7518	63.9187	56.3101	44.4088	104.141	139.155	74.7814	40.9073	124.907	100.071	1.13318	0.675314	0.663906	1.18799	1.11728	2.89101	2.62502	1.9772	4.36364	3.55366	17.6557	19.6725	48.8139	27.231	49.3867	31.3098	37.6253	51.8952	25.1204	28.0252	26.2248	48.1984	58.91	69.567
PF3D7_0208700	NA	NA	47.2073	41.4381	45.7564	40.166	27.7328	42.4438	65.7128	65.5191	90.8992	91.266	63.2042	62.1481	73.8888	65.8962	54.4815	31.4511	60.088	57.0378	44.5555	45.9383	54.7196	29.2415	30.0012	56.2813	54.6274	31.5474	52.2281	53.3914	61.3047	49.5231	61.6165	68.1778	85.3354	64.4667	69.9514	73.9529	72.2156	45.357	58.6824	81.0981	42.6887	60.4927
PF3D7_0208800	NA	NA	10.8862	11.4801	12.3943	6.16338	7.75458	9.0238	23.1914	23.261	32.0611	27.3518	23.7359	20.1866	30.8813	22.3633	40.0403	17.2989	27.0986	25.5063	13.0069	10.2808	7.01884	9.73355	10.1245	6.11277	7.21546	8.17946	7.08081	8.80197	15.4474	15.227	17.7692	11.6765	16.992	12.8376	14.6445	18.7692	7.00818	14.9073	15.0304	2.37002	6.90961	18.5454
PF3D7_0208900	6-cysteine protein P230p	P230p	0.0249749	0.0578484	0.0813366	0.152562	0.201216	0.28293	0.633314	0.504914	0.893544	0.63562	0.396112	0.575388	0.410453	0.329964	0.153724	0.0417221	0.202296	0.292071	0.0321959	0.188033	0.0880269	0.0590678	0.0317441	0.0862463	0.0522074	0.11968	0.322924	0.161546	0.151355	0.244534	0.177808	0.0378728	0.232479	0.37883	0.446751	0.651861	0.208168	0.315496	0.305682	0.780247	0.333747	1.21869
PF3D7_0209100	patatin-like phospholipase 1	PATPL1	40.2696	36.2143	34.8126	38.7281	33.4092	34.3337	57.5098	60.2365	73.4937	77.84	76.3986	88.7419	125.35	106.681	123.933	78.3566	94.7945	99.2983	43.122	61.5487	49.531	57.8639	37.012	40.9448	35.5402	37.3454	33.4363	33.8263	27.4759	32.9969	24.2742	26.6902	26.055	26.1209	49.0393	41.2888	46.5968	53.6773	83.8858	44.8283	81.5334	76.5308
PF3D7_0209200	exosome complex component MTR3, putative	MTR3	56.078	60.1251	69.9963	49.3728	48.9302	38.0085	69.7259	54.7736	39.2604	47.8762	35.3542	66.1672	69.4587	109.109	70.2215	69.0286	59.9511	54.0502	50.9262	54.2101	29.0078	44.0308	30.0115	31.6225	27.0519	31.7063	33.759	33.9602	42.3778	38.1079	39.4396	44.7571	32.7572	39.8188	43.6582	41.4806	54.5633	43.9766	31.2618	39.5176	52.3756	47.1385
PF3D7_0209300	2C-methyl-D-erythritol 2,4-cyclodiphosphate synthase	IspF	5.9802	3.41274	2.8226	4.44722	4.18963	6.54562	22.7102	23.1288	17.4422	28.0448	36.3648	38.038	37.8008	25.3345	32.808	11.7277	34.5394	27.8006	2.68148	5.03375	1.83286	5.84196	4.29626	2.69368	1.90232	1.95794	2.3113	1.4716	9.76947	7.63738	16.2898	5.52	14.2192	10.8458	37.2082	17.2487	66.0995	52.188	18.4976	30.1711	28.1623	26.1215
PF3D7_0209400	NA	NA	15.1445	12.2292	9.35149	14.2587	11.4739	10.1435	58.3293	38.2015	28.1688	39.5704	49.0813	73.7829	45.4929	67.2308	59.0087	35.0483	33.5373	35.1663	10.9258	30.037	11.8755	22.3452	12.5385	9.5961	7.26099	9.98704	10.5544	8.98714	9.26217	9.91142	14.0463	10.5347	18.4299	11.1961	61.0985	19.1899	97.8578	73.1318	42.5142	54.3617	64.9844	36.6909
PF3D7_0209500	NA	NA	0.37225	0.287409	0.134702	0.151595	0.124963	0.156188	0	0	0	0.150379	0	0	0.470598	0.614762	0.381876	0	1.4071	0.31095	0.799798	0.400374	0	0.293468	0.31543	0.285666	0.129691	0	0	0	0.150396	0	0.176681	0	0	0	0	0.134944	0	0	0	0.369192	0.698172	0
PF3D7_0209600	NA	NA	0.60837	0.725922	0.420275	0.67569	1.61525	1.04424	3.19449	3.50344	4.3697	3.01621	7.41616	6.3072	31.8827	30.9633	29.7866	9.60882	42.6477	39.1304	0.285188	0.178455	0.389867	0.654021	0.281186	0.0636635	0.635866	0.265028	0.357554	0.447176	0.201103	0.154719	1.1025	0.922552	0.57917	1.04864	1.73131	0.842059	2.30492	2.40649	3.51155	1.56328	7.66302	3.81003
PF3D7_0209700	NA	NA	92.2862	99.0569	97.195	110.595	143.514	152.066	56.6275	51.2075	70.2646	88.2203	93.049	85.2488	74.3446	54.5615	87.7811	89.2269	65.4745	68.5339	153.325	243.172	161.569	169.689	124.158	148.191	166.21	200.612	163.04	160.899	133.613	125.542	82.1676	98.5299	91.235	120.377	145.283	101.441	85.0602	103.256	85.5917	138.93	99.6076	63.2214
PF3D7_0209800	ATP-dependent RNA helicase UAP56	UAP56	921.735	884.689	900.063	954.94	922.344	984.901	1439.61	1546.01	1611.88	1783.63	1715.46	1898.97	1528.31	1381.23	1462.99	1205.43	1262.92	1383.78	1008.16	1201.95	1026.78	1022.85	1025.31	1003.22	937.939	950.378	937.919	976.684	1225.97	1098.28	1336.8	1275.34	1445.17	1285.64	1453.33	1403.85	1333.86	1492.52	1586.03	1392.21	1333.61	1364.3
PF3D7_0210000	secretory complex protein 61 gamma subunit	Sec61-gamma	464.617	425.985	579.038	465.869	464.062	627.15	377.868	401.678	697.177	497.324	682.029	583.621	1006.64	745.849	1152.38	638.297	948.273	1204.53	554.621	489.035	659.885	261.159	512.842	682.603	906.535	623.049	839.859	817.437	649.278	578.263	449.384	511.038	587.735	491.905	750.683	393.09	548.833	401.153	770.463	644.589	700.317	244.938
PF3D7_0210100	60S ribosomal protein L37ae, putative	RPL37A	6416.08	5924.38	6039.46	6173.38	6486.28	6715.74	5983.72	6647.59	6908.68	6033.04	6324.47	5258.9	6383.12	6639.04	5991.19	6376.89	5854.22	5795	6940.38	6067.06	8837.79	6911.22	6507.16	8611.07	8832.26	8925.61	9144.17	9253.42	7001.47	6813.96	7656.7	7274.64	7960.84	7618.57	6363.31	7219.33	7292.37	4744.03	8199.31	6919.49	7581.77	4880.46
PF3D7_0210200	NA	NA	1.42799	1.51364	1.78666	0.561822	1.29186	1.00536	45.758	54.542	64.2595	47.1664	45.0527	21.2728	103.634	78.663	71.8056	23.2085	122.332	99.1066	0.717625	0.546668	0.554494	0.85864	0.738317	0.835813	1.03718	0.662753	0.997515	0.998036	8.742	7.21091	19.5748	12.1852	22.8674	12.8035	18.8692	38.7191	10.7256	17.8692	19.8108	25.8167	46.251	52.8456
PF3D7_0210300	NA	NA	3.55724	5.91553	5.79248	4.84741	7.02712	9.81629	45.2949	35.036	38.548	41.9502	34.9168	46.1778	76.9688	75.0153	73.0546	33.3698	73.8069	70.4006	1.411	0.735768	1.08501	0.485375	2.08679	0.944944	3.43201	5.61966	5.74935	4.53551	6.30151	7.27211	15.0005	14.1082	18.9442	13.3597	23.0461	19.3429	32.6909	30.9181	40.6085	25.0353	56.9666	32.8574
PF3D7_0210400	NA	NA	10.9659	4.03171	9.63681	7.65556	13.673	7.88747	164.048	117.534	79.4007	70.2459	93.3613	120.304	93.7405	155.227	100.441	54.085	69.3667	74.153	1.34633	0.561636	3.68099	0	4.64602	5.4098	7.64099	8.57934	8.01777	5.48871	21.5191	8.03441	38.6637	19.7964	54.6833	27.2274	77.8401	52.8136	120.418	71.0955	63.5135	78.461	77.8607	70.9467
PF3D7_0210500	NA	NA	1.11647	0.754263	0.909014	0.284171	0.89014	0.995449	4.65305	5.3294	9.36206	9.24603	5.43305	3.69754	3.58742	3.76449	3.07811	2.33142	5.1246	4.8574	0.71964	0.350241	0.327928	1.04522	1.06431	1.07098	0.340356	0.827999	0.714278	0.639425	4.05968	2.27742	4.63673	3.73884	5.46698	4.5866	7.21191	8.70172	1.61561	5.68072	0.996416	8.99683	3.86081	7.74474
PF3D7_0210600	protein CERLI1	CERLI1	3.78496	4.65406	4.86977	3.59657	1.41177	3.17616	2.36985	3.9677	3.5526	2.37848	3.63824	4.19853	17.1903	15.7427	33.004	10.3041	104.692	108.2	4.69859	6.03099	3.45865	3.81278	1.78179	2.25913	1.02564	2.68704	1.24614	1.24679	1.01946	0.980403	1.19764	1.27547	1.95734	0.797386	3.55244	0.762267	3.50533	2.95145	3.86052	2.29403	20.8036	1.87778
PF3D7_0210700	syntaxin, Qa-SNARE family	SYN17	0.397855	0.921535	0.431902	0.729101	0.200337	0.500792	1.40122	1.07245	2.96548	2.65193	3.44189	4.58301	3.77225	1.97114	5.81603	0.996959	9.66783	9.80399	0	0.855827	1.05171	0.47048	0.252844	0.915945	0	0.40854	0.321515	0.160841	0.723331	0.556496	1.98275	1.5083	0.925855	2.26306	4.74454	3.24508	1.38173	3.62982	3.04347	3.25534	3.91752	1.713
PF3D7_0210800	NA	NA	15.6655	13.1418	12.264	22.0834	17.5969	25.0276	6.79053	4.46639	8.98198	17.1599	14.3343	23.9451	9.33089	3.48267	11.5894	12.8334	8.54069	5.03301	22.7193	79.7092	22.5638	35.6253	20.6773	14.7382	12.2802	18.5611	10.5903	12.788	19.3526	18.1196	10.9385	13.9336	14.3719	12.4237	29.8637	14.4156	31.1786	28.3311	8.87253	30.252	13.0309	13.4034
PF3D7_0210900	NA	NA	114.99	102.024	95.7117	99.6566	120.013	100.461	274.123	274.998	305.803	366.384	346.499	404.728	350.502	278.502	364.041	152.797	307.03	262.451	78.7955	182.561	83.3066	124.021	96.693	68.8405	77.2142	89.8573	102.521	101.152	180.147	157.151	269.863	215.385	280.644	227.616	308.739	275.217	274.892	253.676	197.457	262.981	268.917	259.384
PF3D7_0211100	NA	NA	0.726031	0.948639	0.666907	1.0917	0.899911	1.68716	2.20299	2.40871	3.49673	6.7684	4.91206	4.43903	0.706037	0.0922326	0.85939	0.839685	1.35712	1.21295	0.431976	0.840953	0.0984222	0.59439	0.851829	0.25715	0.175118	1.03227	0.586721	0.316092	2.70766	2.81224	2.70376	3.47232	4.15892	3.75916	9.07441	5.64852	4.57744	12.9343	2.60608	10.2194	2.08184	5.45045
PF3D7_0211200	ras-related protein Rab-5A	RAB5a	7.16897	5.74007	8.93543	12.6511	10.9634	7.68694	72.1925	87.3182	83.5172	98.7883	98.772	163.328	165.148	106.554	160.161	53.2275	123.019	123.761	2.396	3.99809	2.57357	3.76783	6.07469	6.11277	3.88525	4.36238	7.93909	7.51388	19.6311	18.1981	36.2945	24.561	43.5613	24.1649	62.9318	55.4413	37.6229	42.4859	69.6678	41.8704	81.6081	66.5602
PF3D7_0211300	NA	NA	0	0	0	0	0	0.269197	6.6283	2.59419	6.6951	7.25721	8.94245	10.5933	11.6258	9.18297	11.1891	3.21545	4.85041	8.39637	0	0	0.56534	0	0	0	0	0	0	0	1.03686	0.29914	1.21807	0.64862	3.73265	0.810994	9.24518	3.72132	9.20996	12.6076	8.17999	9.22665	5.56542	6.13873
PF3D7_0211400	beta-ketoacyl-ACP synthase III	KASIII	0	0	0	0	0	0	0.71191	0.454061	0.502218	0.408288	0.485751	0.970194	0.21295	1.66911	1.81442	1.407	0.818647	0.562831	0	0	0	0	0	0	0	0	0	0.136196	0	0	0.239849	0	0	0	0	0	1.17001	0.7093	0.38657	0.751782	0.118473	1.12819
PF3D7_0211500	NA	NA	0.201162	0.0388287	0.109189	0	0.101294	0	3.40071	3.86353	4.87305	3.71784	4.56824	2.66484	11.8254	11.7106	8.43513	3.7806	15.9682	15.7114	0	0	0	0.118942	0.0639213	0.173669	0.0525635	0	0.162564	0.121986	0.182865	0.211031	0.716083	0.381312	1.4629	0.333738	0.749664	3.11746	0.419177	1.27059	1.61578	1.42151	2.68819	5.87039
PF3D7_0211600	UDP-N-acetylglucosamine transferase subunit ALG14, putative	ALG14	0.298391	0	0	0.364551	0	0.375594	4.20366	2.41301	5.78268	5.06277	6.88378	11.6867	35.8364	20.2042	34.437	9.47111	55.59	40.1299	0	0	0.262928	0.35286	0	0	0	0	0	0	0	0.417372	0.849752	0.90498	0	0	6.67201	2.27155	16.9953	3.76942	9.13042	2.66346	32.1097	5.4245
PF3D7_0211700	tyrosine kinase-like protein, putative	TKL1	0.457017	0.862539	0.496127	0.248154	0.818234	1.15052	35.6971	36.2049	43.754	35.6322	36.0227	21.3506	47.4405	36.4797	37.116	11.7066	45.8204	38.8969	0.196385	0.273081	0	0.240196	0.645429	0.233811	0.79612	0.486673	1.06694	0.697978	8.24738	6.60557	18.7269	16.2478	23.6341	14.3458	22.6329	32.4166	10.793	23.3069	14.7223	35.8077	24.0718	44.8934
PF3D7_0211800	asparagine--tRNA ligase	AsnRS	319.054	227.096	302.492	227.913	351.577	265.412	412.633	532.58	515.069	394.995	524.945	449.516	438.094	380.066	446.294	314.213	379.965	310.376	297.073	184.871	268.574	269.721	253.407	247.912	294.563	224.032	346.348	250.091	285.651	265.813	318.636	223.483	309.305	214.676	310.188	331.364	293.773	261.844	506.414	260.286	356.616	419.39
PF3D7_0211900	NA	NA	0.277881	0.214548	0	0.169746	0.27985	0	9.98253	11.9848	13.0488	15.9965	21.2352	29.2891	34.7783	23.8635	33.3527	8.35589	29.4858	29.2473	0	0	0	0.492909	0	0	0	0	0.224561	0.224679	1.01042	2.3321	2.7697	1.05347	3.87997	2.63438	8.28454	6.19515	10.0367	10.1409	10.3097	11.9885	15.3422	18.3454
PF3D7_0212000	NA	NA	0.20084	0.155066	0	0	0.202264	0	19.8057	17.0535	16.7664	12.6569	21.7187	17.3515	46.464	46.7672	39.2493	9.72994	28.6317	33.8889	0.258909	0	0	0	0	0.462376	0	0	0	0	0.973715	0.561847	3.14572	0.609121	5.14117	3.23683	4.49078	7.20782	6.97508	7.32944	8.60367	7.46963	10.7355	13.0671
PF3D7_0212100	NA	NA	9.00025	8.96811	8.70124	6.14105	8.79041	6.36983	17.0812	18.3559	15.9485	17.8226	21.3999	15.884	34.4349	39.4869	36.3222	20.0851	31.0864	28.0299	9.67603	11.5067	9.15758	10.6432	8.07252	11.7286	9.8685	10.8811	10.8139	11.7257	8.06838	11.7339	7.06054	8.807	9.12871	8.27488	18.0741	11.2654	26.7988	23.5019	15.2248	21.5242	28.2348	22.6497
PF3D7_0212200	NA	NA	14.1969	18.1427	20.7262	20.036	23.4183	20.9511	40.3453	49.8154	69.6945	47.1668	52.2334	44.2681	45.1786	38.4026	29.7557	23.3078	41.6359	30.4654	19.8793	7.63474	9.49005	10.1309	15.5559	16.9056	24.0486	17.4268	24.9237	21.3743	29.6679	32.868	37.6413	27.8387	44.4302	27.8462	28.8252	42.0593	22.1023	24.0497	31.4572	33.5013	26.34	37.0035
PF3D7_0212300	eukaryotic peptide chain release factor subunit 1, putative	ERF1	358.989	420.052	421.18	236.822	328.359	282.88	580.812	613.485	487.142	457.423	389.474	361.924	419.593	479.948	311.8	332.141	356.242	381.69	358.978	191.324	227.697	242.558	258.663	219.089	243.92	286.446	282.653	333.466	490.479	480.426	551.604	556.372	572.046	529.373	259.273	556.478	152.132	247.009	309.336	240.893	269.272	520.824
PF3D7_0212400	NA	NA	3.84364	3.99625	3.64061	2.56308	3.74751	3.56594	9.1254	8.64779	9.38235	9.91025	11.3931	10.7251	14.3838	10.2929	14.7981	7.26523	14.7853	11.3973	4.95495	7.18104	3.30587	4.21932	4.55454	4.1424	3.45717	3.42796	3.55163	4.18494	7.85111	7.79665	7.806	8.0579	8.65953	7.18612	8.03511	9.39264	3.1484	7.4584	4.00628	6.56101	5.12667	9.05478
PF3D7_0212500	NA	NA	18.6055	18.5837	16.0218	10.742	14.4839	12.7868	30.679	29.7107	31.9489	26.4302	32.237	24.5431	47.4192	37.2089	37.7142	23.7636	49.8023	36.6967	21.9811	16.1272	14.4712	15.4105	16.5439	19.5192	14.2607	14.5963	13.1323	17.3792	24.6632	26.6612	28.0348	28.2854	28.3898	26.3461	23.1004	31.4694	11.8654	21.7734	13.2478	23.9651	22.5827	28.648
PF3D7_0212600	secreted protein with altered thrombospondin repeat domain	SPATR	4.24405	14.2636	5.42028	6.10005	3.51987	8.48453	22.1571	12.4496	16.7473	20.2712	19.7977	25.0194	41.6601	34.2201	54.5504	21.2698	184.825	203.951	9.3331	8.86088	11.6589	11.5136	3.49046	6.89696	3.13119	3.93077	2.01747	5.45002	2.11812	2.44437	4.97663	7.57154	11.3288	6.15353	9.3036	15.204	15.9532	27.6825	15.8509	16.3415	27.7426	35.1131
PF3D7_0212700	NA	NA	4.05625	4.64367	3.34049	5.29738	3.38069	6.51421	5.32026	10.5569	7.29786	9.83171	11.8987	16.1121	10.9631	7.16079	7.53309	3.27127	12.689	7.1271	3.96685	3.9114	3.57418	3.47347	3.73341	3.05911	4.97054	2.58529	3.95614	3.39275	8.47654	6.06493	8.5639	7.21156	8.95114	10.7407	16.263	10.9521	7.57793	8.44194	6.74082	10.6122	8.7554	10.3048
PF3D7_0212800	multidrug efflux pump, putative	MATE	1.43228	1.57977	1.44379	1.24989	2.98789	3.79886	26.7353	25.7847	29.5107	28.3308	20.2826	19.6218	14.9381	16.1352	13.1451	7.51992	11.0213	15.5534	0.725367	0.385122	0.631027	0.604903	1.04027	0.471058	1.33662	2.27615	2.14955	2.0266	6.57198	5.29466	10.8525	8.84294	14.8798	9.16539	14.564	17.5791	3.69514	14.9341	17.1391	13.7739	9.85776	29.0231
PF3D7_0212900	arginyl-tRNA--protein transferase	ATEL1	1.19846	1.18969	0.929297	0.209168	0.517265	1.72404	47.0328	50.5347	45.9406	45.6479	53.0742	68.6325	134.843	140.242	139.63	49.7662	113.993	117.558	0.662128	0.920715	0.452581	0.404921	0.435224	0.591235	0.715783	0.937633	0.968497	0.553716	2.90518	2.63423	9.50747	7.00988	8.76527	4.05774	26.5422	16.0126	34.4866	24.2712	33.7901	22.6685	53.585	55.8597
PF3D7_0213000	NA	NA	1.12567	1.15882	0.814665	0.916834	2.26729	0	91.9771	90.524	88.3784	84.5815	91.9727	108.058	116.217	112.78	114.9	38.8635	108.199	77.7314	0.48371	0.807142	0	0.887432	0.476922	0	0.392181	0.256867	0	0	9.09578	6.8229	17.6311	11.949	23.576	13.5174	60.4077	42.4386	156.375	99.0132	72.0456	72.009	91.3111	75.7515
PF3D7_0213100	protein SIS1	SIS1	316.358	287.489	312.003	316.461	372.116	338.754	378.33	394.039	309.766	292.225	344.372	415.762	334.928	418.343	371.04	388.814	236.965	266.967	229.571	257.499	267.515	275.456	279.85	292.908	390.974	344.999	389.255	326.628	300.105	308.766	380.219	406.952	354.804	370.696	443.76	327.062	510.917	443.776	514.315	449.954	471.13	334.399
PF3D7_0213200	NA	NA	0.493402	0.761899	0	0.6028	1.9876	1.24212	25.7185	25.2701	65.4624	62.7863	75.4099	82.413	66.1184	35.0382	66.8132	16.4851	51.9551	52.7555	0	0	0	0	0	0	0.515702	0	0.398729	0.398937	8.97044	8.28171	18.9689	14.9642	20.0936	12.1617	36.0394	40.7807	39.0692	38.7825	36.989	53.5837	35.0495	45.7924
PF3D7_0213300	NA	NA	1.58638	0.612412	0	4.84529	1.59763	1.99683	112.86	103.698	73.3111	76.9028	59.4706	81.3194	58.1596	79.9061	56.1454	30.4767	62.9633	49.0304	0	0	0	0	0	0	0	1.08599	0.640994	3.84798	9.61389	9.98522	37.2708	28.8677	20.3044	13.5354	48.4776	22.428	44.0755	21.1533	47.9347	50.7405	58.019	58.4371
PF3D7_0213400	protein kinase 7	PK7	2.5502	1.54705	1.18647	2.00291	8.98897	4.58574	147.299	176.03	223.756	212.15	242.421	253.268	160.507	127.852	163.696	60.2523	151.973	128.576	0.704473	0.587759	1.12356	0.215409	2.31529	1.46778	5.14053	3.74099	5.00497	2.20923	33.5592	26.753	66.3992	56.3508	84.7803	41.7909	159.12	142.038	254.315	228.576	239.952	222.213	209.343	218.557
PF3D7_0213500	NA	NA	9.51485	8.60566	11.5096	8.80141	11.6356	13.8587	36.5746	37.556	36.6761	35.0879	29.3979	33.6643	20.6206	26.2641	19.8704	12.7161	20.6988	21.6867	13.3172	9.94133	11.019	8.35842	12.0937	13.4561	10.9394	12.655	12.0829	12.8586	21.088	17.6817	20.7092	22.4674	25.938	19.9736	26.7459	33.5559	27.0022	24.8024	23.8114	24.0635	20.1718	29.6524
PF3D7_0213600	NA	NA	0	0.0400005	0.0562419	0.0316476	0.0521755	0	0.58389	0.977573	1.04264	0.784844	0.85905	0.477436	0.818699	0.812821	0.518192	0.173097	1.51072	0.605875	0.100181	0.139306	0.114127	0.214429	0.197551	0.0298184	0.0812247	0.0531997	0.125602	0.0837784	0.156986	0.289865	0.4795	0.235691	0.361692	0.343809	0.61783	0.901485	0.431826	0.54539	0.178343	0.462444	0.41904	1.1649
PF3D7_0213700	NA	NA	82.0671	79.2817	81.6294	59.2689	84.6845	58.52	133.839	131.314	47.0076	59.2834	34.3911	42.8438	26.5761	55.4145	24.2614	43.223	11.7885	17.5603	23.9733	26.9585	27.7855	43.5042	40.0799	48.3974	47.3248	74.1698	76.4479	58.1831	45.0799	50.8924	87.497	78.4705	78.5558	65.1542	66.8923	63.3104	88.1722	63.5533	38.9663	58.9397	30.424	73.4932
PF3D7_0213800	NA	NA	0	0.14442	0.203058	0.114262	0.0941885	0.35317	0.263513	0.630264	2.37017	1.36015	1.48335	2.37017	0.591174	0.463365	0.287832	0.15624	0.151511	0.312497	0.3617	0.201183	0.0824102	0.442392	0.475498	0.215315	0.195505	0.64025	0.982539	0.226858	0.453431	0.784908	1.06536	0.850951	1.08823	0.797981	2.50947	0.813691	2.98825	6.03858	1.43089	4.59148	0.789351	1.34228
PF3D7_0213900	NA	NA	24.7534	32.005	26.1723	13.9073	17.4124	16.1534	49.547	63.1787	53.31	47.9596	36.7747	29.5039	23.3511	25.8934	16.1119	21.7973	21.0505	20.1389	38.6247	15.0732	22.5212	19.684	23.1362	27.8139	19.3059	20.1067	19.9604	22.5757	43.7996	43.8616	56.8067	51.9491	60.3531	53.2968	30.0155	57.1684	22.303	33.7644	20.5376	40.7392	22.5081	50.7588
PF3D7_0214000	T-complex protein 1 subunit theta	CCT8	118.4	127.857	122.519	94.7429	118.658	105.457	268.895	256.477	248.756	282.228	199.002	247.388	137.864	159.706	123.415	105.452	112.355	116.254	120.054	129.704	111.141	100.711	85.3664	104.942	98.9046	101.83	111.442	126.336	175.398	152.052	234.151	209.47	234.846	203.597	176.667	246.482	101.477	138.166	165.874	145.926	122.233	207.579
PF3D7_0214100	protein transport protein SEC31	SEC31	105.104	106.095	102.499	75.3075	91.2297	85.787	123.18	113.888	126.983	142.648	119.505	110.775	217.417	191.293	192.782	130.566	196.68	222.281	117.328	129.253	107.917	96.5523	101.343	95.3086	72.5686	81.6844	74.2378	103.602	88.2297	97.175	84.3748	90.6978	88.9099	93.7893	75.4499	96.9886	33.9444	70.1475	102.513	57.7565	110.15	107.324
PF3D7_0214200	ribosomal protein L13, mitochondrial	mRPL13	32.6549	23.3953	22.6748	41.6923	39.7007	42.5849	203.907	175.255	189.456	172.562	255.354	297.202	239.512	243.894	264.825	134.168	181.102	185.536	7.58494	15.1879	13.4797	11.4804	17.9484	18.2867	22.7538	18.5282	24.0117	23.5485	28.5257	23.8666	44.4025	34.351	45.5266	33.4678	216.198	84.1435	370.265	289.461	290.759	225.393	274.364	184.087
PF3D7_0214300	NA	NA	1.0523	1.62494	1.30555	0.09183	0.857902	0.34691	3.67085	3.30932	2.80126	1.91296	1.01151	0.577229	1.2353	2.9378	0.77108	0.502266	2.63826	2.15568	0.839772	0.188634	0.287002	0.414797	0.286611	0.634496	0.680867	0.360188	0.425194	0.48619	1.85243	1.0864	1.10593	1.36778	2.12815	1.66268	1.12045	2.42505	0.174028	1.01985	0.555821	1.23002	0.969199	3.09244
PF3D7_0214400	NA	NA	85.2002	85.7585	88.6513	70.6288	90.2827	73.5316	76.032	75.8736	77.442	74.7166	62.8076	69.7375	18.3989	23.0337	19.4402	60.9512	21.6123	19.7554	105.665	110.226	99.2977	100.155	93.1344	123.204	93.5933	82.4032	79.4698	90.9519	96.4072	104.047	91.8143	98.7012	102.781	109.708	88.1351	99.0324	51.5274	104.551	47.9347	143.59	38.03	96.895
PF3D7_0214500	NA	NA	2.85755	3.46701	4.43157	2.74304	2.67225	3.33997	2.87547	3.30118	8.21544	7.91573	7.94606	10.8156	3.09644	0.674169	4.08308	0.340979	5.29054	2.55749	3.68376	11.4157	2.51794	2.89644	1.5566	1.17477	0.426672	3.21376	1.31957	0.495098	2.96872	1.99849	1.74379	1.85712	2.84995	2.32203	9.12783	3.32964	9.64061	6.58933	3.90348	7.28763	2.72759	6.24938
PF3D7_0214600	serine/threonine protein kinase STK2, putative	STK2	1.24228	1.97472	1.46758	0.848138	0.55195	0.873831	1.18389	1.28037	1.47064	0.974177	0.26341	0.715511	3.88003	3.01705	5.50992	2.31946	26.6951	22.9822	1.78987	1.41473	1.44879	1.38264	0.928816	0.799116	0.534646	0.75038	0.501956	0.502219	0.221428	0.357747	0.520256	0.221628	0.425138	0.311748	0.871446	0.357621	0.456817	0.102569	0.475155	0.597919	2.13294	1.04878
PF3D7_0214700	NA	NA	1.03745	0.961204	1.57673	1.01398	0.835845	0	0.292308	0.83896	0.618626	0.251462	1.49585	0.956059	4.45925	3.76932	0.95785	2.42637	18.8235	18.1988	1.33741	1.56217	0.548492	1.4722	0	1.43306	1.30121	0.284084	0.335355	0.503295	0.251489	0.580451	0	0.629291	0	0.393412	0	0.225651	0	0	0	1.23471	1.89714	1.38968
PF3D7_0214800	NA	NA	17.9035	17.1025	18.3448	13.7822	13.8447	14.1997	12.804	12.0035	14.0255	15.6643	10.1413	8.94389	8.66079	6.71295	8.64439	12.5129	10.6543	9.30887	19.8416	21.1719	21.1684	19.5513	19.8534	21.1871	17.7579	18.7595	16.2767	18.5378	20.8142	22.5509	19.3145	22.232	20.0346	24.4635	17.0204	22.103	2.982	9.61588	9.43322	11.8225	7.64516	15.0324
PF3D7_0214900	rhoptry neck protein 6	RON6	5.20537	7.63101	7.36754	0.0805001	0.729936	0.580571	3.34171	3.10824	2.35742	1.9165	3.8952	1.36623	73.9695	134.498	52.3182	21.6846	270.166	227.371	2.63319	0.496083	0.812837	0.779186	0.669998	1.21356	0.344344	0.270642	0.372734	0.532755	0.79863	1.01381	1.59496	0.599513	1.76336	1.06192	0.196442	2.00642	0.549205	0.36994	0.856877	1.56839	24.4691	4.53918
PF3D7_0215000	acyl-CoA synthetase	ACS9	3.32406	4.09542	2.30331	1.4689	3.20517	2.6707	36.7654	37.6522	41.3293	39.2564	59.5532	42.4459	100.586	84.0961	102.627	38.1624	113.428	100.61	2.7352	1.36923	1.99422	1.25452	2.15745	2.1167	1.77411	2.17873	1.94324	2.80202	4.71471	4.15487	6.24366	5.89871	8.64071	4.15703	18.1334	17.0751	14.5409	12.6073	30.8925	18.0971	57.3037	44.2557
PF3D7_0215100	NA	NA	25.7774	27.6692	32.761	19.459	28.9149	20.8398	68.2005	69.2025	56.8598	48.7651	59.2258	78.7006	109.95	102.793	83.8466	63.7187	93.3641	92.9575	19.7221	12.6227	11.6339	14.6219	12.786	22.1941	21.9044	16.6422	26.5895	29.8229	33.2756	35.1765	45.0596	38.4541	37.0652	39.1399	20.9309	39.2014	4.36701	18.2378	36.7126	9.97683	26.2369	62.7622
PF3D7_0215200	NA	NA	1.27882	1.77725	3.60947	0.624944	4.3788	4.18519	8.64753	3.79187	3.81276	3.71958	4.42529	3.83009	7.11339	4.22388	3.54209	1.2818	2.48601	3.84563	5.2754	4.67648	1.3522	4.83922	2.60068	1.76647	1.06929	1.05053	1.86019	2.89514	3.09999	3.57747	3.64179	5.81773	5.05914	5.33435	2.6688	4.45039	2.48711	3.58993	0.97826	5.70741	1.61898	5.139
PF3D7_0215300	acyl-CoA synthetase	ACS8	16.0708	20.8434	17.8287	10.9365	8.02138	9.31591	1.19159	0.760003	1.15584	0.939658	0.406522	0.811951	0.53465	0.931248	0.433852	11.8929	2.39793	2.29628	27.078	21.5304	17.701	17.6708	13.349	15.6594	9.28264	9.84357	9.22772	13.6209	10.3374	16.3662	7.92879	8.97854	4.51081	8.41965	2.20649	6.3624	0.293754	0.890415	0.485278	0.943744	0.446174	1.4837
PF3D7_0215400	NA	NA	64.5297	57.9274	53.4129	40.1268	57.7231	40.6128	55.5246	50.5169	40.898	46.0488	33.4284	29.6742	38.1839	44.138	36.964	46.2618	38.9148	37.6571	48.9825	41.5599	38.9852	42.0386	37.5719	42.9967	42.7428	42.8526	53.5009	50.9774	48.2394	50.9854	51.8104	51.4667	43.1622	49.8198	24.384	46.2949	10.3779	20.9714	17.489	20.1196	16.9857	47.0151
PF3D7_0215500	NA	NA	17.4471	26.7516	23.1195	4.50327	7.0943	4.33038	26.1946	33.8925	35.1671	27.0014	17.5975	8.58641	22.7815	23.1319	13.1086	13.1364	29.0604	27.7796	33.4734	5.10979	7.57851	8.62085	10.8277	13.5775	8.90378	9.36438	9.20099	14.769	32.2662	38.0381	36.6226	33.0406	39.6484	39.2153	5.6167	45.0748	2.84474	7.93304	4.38618	9.62674	4.14796	36.5216
PF3D7_0215600	Golgi to ER traffic protein 2	GET2	15.5104	20.5977	20.8788	8.52724	14.0583	7.80938	37.5832	27.8034	27.0527	20.8651	11.8528	7.32544	30.981	46.6195	20.2871	11.4009	30.1522	25.1352	18.1954	8.34113	11.3436	14.1231	9.46289	13.9262	15.7251	19.3248	19.6788	20.6924	22.5593	23.8646	26.0605	22.5797	27.4319	26.6147	11.5604	27.4948	6.6795	5.66036	6.76307	12.691	14.9452	22.1121
PF3D7_0215700	DNA-directed RNA polymerase II subunit RPB2, putative	RPB2	80.1851	81.0312	81.0106	71.646	88.0005	80.8745	184.124	174.201	175.54	170.061	162.104	153.085	149.574	154.108	145.606	107.257	121.8	135.796	81.2615	91.8721	79.8783	86.1468	80.2993	73.314	74.1876	76.0369	74.0131	77.0743	102.626	102.027	146.378	141.932	146.312	134.404	114.235	149.303	70.0417	103.629	143.482	103.857	103.624	170.118
PF3D7_0215800	origin recognition complex subunit 5	ORC5	0.139249	0.322537	0.151166	0.170124	0.210354	0.0876386	22.4616	18.5802	17.5408	16.7071	16.9656	19.008	20.9486	29.2058	22.0703	7.21134	21.3176	18.3202	0.17951	0	0	0.329336	0.0884955	0	0.145543	0.285978	0.33759	0.337767	2.53166	1.65557	7.93102	5.17347	7.93921	4.68642	8.61431	8.1776	5.31966	10.7498	11.5043	10.0471	9.7938	18.6527
PF3D7_0215900	palmitoyltransferase DHHC11, putative	DHHC11	0	0.185366	0.26063	0	0.483573	0	1.01468	1.29433	2.50532	2.61867	5.53867	6.08434	7.58787	3.56845	17.3636	0.401075	14.0017	11.4313	0	0.516447	0	0	0	0	0	0	0	0	0	0	0	0	0.279353	0.227606	1.43154	0	1.00056	0	3.85682	0.714337	3.88375	1.14856
PF3D7_0216000	NA	NA	0.282262	0.435861	0.0680926	0.0766323	0.0315847	0.0789537	1.59057	1.43718	1.5896	1.63438	0.6783	0.830929	4.00448	3.21124	2.6543	1.467	2.84519	2.80317	0.161721	0	0.138175	0	0.159451	0	0	0.0858793	0	0.101431	0.114039	0.131604	0.26794	0.428031	0.18246	0.148662	0.607761	1.02322	1.17634	1.84887	0.671758	1.58634	1.78671	4.11103
PF3D7_0216100	NA	NA	1.80094	1.96303	2.01256	1.16484	1.49364	1.2668	6.04432	8.35272	9.79134	7.12553	5.57525	3.41692	13.7944	8.39776	7.49871	3.27404	14.0727	10.8846	3.00448	2.10792	1.72692	1.87914	2.01976	1.95113	1.21798	0.725219	1.24135	0.856551	2.18283	2.22269	2.7906	1.6868	3.01999	1.95842	4.73752	3.80193	4.78291	1.93304	2.99845	5.75244	3.6882	5.77757
PF3D7_0216200	NA	NA	44.5231	49.6538	47.7365	47.0079	44.5619	44.2805	44.1384	35.5601	46.7063	41.3015	48.7412	48.1216	38.2189	42.211	41.8681	36.2709	46.7491	32.3702	52.7902	80.1071	64.6595	62.7255	38.775	105.665	75.5481	61.3348	74.8473	59.7758	45.6365	58.0476	46.1773	47.9282	48.6074	53.1521	61.043	44.8333	71.0137	59.407	55.5034	70.3246	47.5515	39.707
PF3D7_0216300	NA	NA	4.89689	6.19635	3.88852	3.32369	3.83569	3.93803	19.9294	16.9277	18.9258	18.1886	13.7943	11.2295	10.2604	11.307	9.48886	6.58988	9.91618	9.39301	5.72822	5.02303	2.87661	4.23585	3.45786	3.34035	2.89084	2.26589	2.19849	3.77605	6.75964	7.8008	12.9769	7.97587	12.5036	9.88655	11.6929	14.2506	6.6767	9.86451	6.00051	11.1299	7.04771	19.7825
PF3D7_0216400	vacuolar protein sorting-associated protein 45	VPS45	0	0.200749	0.188173	0.952975	0.960123	1.52731	6.71539	8.99455	12.9201	13.7598	23.7433	25.5584	33.9659	15.3152	36.0088	5.64668	30.7485	23.8187	0.446913	0.559306	0.534584	0.204981	0.220321	0.399063	0.452933	0.474652	0.420237	0.420457	3.15144	1.45474	5.55336	2.76	5.04226	2.87577	14.5991	7.54043	8.30758	21.0455	14.1881	13.2804	10.1189	12.6876
PF3D7_0216500	NA	NA	0.0381156	0.264857	0.206887	0.0931334	0.115157	0.0479773	1.4498	1.59253	1.64779	1.57057	2.52803	3.20518	6.60144	4.21745	7.21417	1.08246	6.4217	5.66734	0	0.204977	0.0335857	0.180293	0.0484465	0.219376	0	0.156557	0.123208	0.123273	0.369585	0.373197	0.814087	0.288999	0.798297	0.903365	1.30681	0.704679	1.32374	2.03298	1.69113	1.24748	2.68079	2.04226
PF3D7_0216600	NA	NA	32.0151	34.0847	32.7746	33.8762	31.3235	21.3547	31.6101	31.2251	27.0584	35.373	36.8237	42.1327	70.6845	64.471	95.8622	56.9877	95.0107	84.6484	37.509	32.57	36.8903	34.0841	31.7656	45.6723	34.1294	27.8485	29.9261	33.0392	30.8442	29.7263	28.9621	34.8556	28.8673	32.5994	18.8992	32.5358	4.3081	13.8267	35.5847	16.6902	27.0078	40.4063
PF3D7_0216700	autophagy-related protein 11, putative	ATG11	3.57681	7.37594	6.04553	0.387203	1.23112	0.683885	57.5331	66.5757	62.5	25.4602	22.3916	6.57152	71.3757	101.391	25.36	12.2531	130.778	94.4373	5.54484	0.389574	0.797902	1.87393	1.26605	2.03258	0.757158	1.08482	0.731771	0.878584	7.18889	5.76299	18.2445	8.30764	17.2795	10.6449	9.51629	33.4332	2.13849	8.32505	3.35959	14.5489	20.6668	45.9193
PF3D7_0216800	NA	NA	0.446391	0.516979	0.181722	0	0.0561944	0.280943	1.17912	1.12808	1.66363	1.48772	6.51676	5.01356	17.353	16.4028	20.0918	7.92329	19.0731	23.8644	0.0719319	0.0600146	0.442505	0.197954	0	0	0.0583207	0.152793	0.0450922	0	0	0	0	0.0846152	0.324626	0.105797	2.74485	0.242731	1.86035	0.704879	4.05503	0.581075	11.1456	1.33471
PF3D7_0216900	NA	NA	1.4811	1.31947	1.60785	0.974345	0.573693	1.00386	3.69158	5.06732	4.24603	2.76151	3.94253	3.14978	3.02466	3.95124	5.6101	2.47427	3.13765	3.99713	1.46872	0.857772	0.903516	0.943099	0.724054	0.655734	0.714482	1.71587	1.93347	1.65813	2.34754	3.66528	2.43338	3.28261	2.51875	3.78034	2.37766	2.97367	3.16542	3.99787	2.52747	4.91529	3.92642	4.25135
PF3D7_0217000	NA	NA	0	0	0	0	0.0645919	0	0.903551	1.03732	1.52979	0.310917	0.554859	1.10823	3.89195	2.33027	1.97387	0.64287	3.11706	3.37526	0	0	0	0	0	0	0	0	0	0.0518577	0	0.179423	0	0	0.223883	0.0608038	0.191214	0.279004	0.356393	0.0900238	0.294379	0.0954155	0.857083	0.552298
PF3D7_0217100	NA	NA	0.794628	1.05175	1.47879	0.970814	1.82917	0.857334	133.855	130.355	118.458	124.781	150.583	166.203	274.965	299.206	256.955	117.386	215.162	254.131	0.878039	0.854664	0.500134	0.402721	0.288572	0.522686	0.237298	0.388557	2.0182	0.458922	7.56746	6.03374	24.7305	15.3207	30.7759	10.9771	62.2721	48.1471	90.8338	87.4752	144.412	70.0846	150.021	174.108
PF3D7_0217200	NA	NA	0.0344676	0.026612	0.112252	0	0.138848	0.0867709	3.10766	3.2054	4.21333	3.55062	1.68971	0.674973	1.78653	1.30922	1.43203	0.230321	1.95431	1.98663	0.266599	0.148287	0.0607424	0.0815188	0.131429	0.0396758	0.144102	0.0943822	0.055708	0.111474	0.584872	0.530324	1.52142	0.888553	1.52399	1.01296	1.02759	2.96127	0.478818	1.40299	0.263667	1.17936	0.751505	2.93509
PF3D7_0217300	AP-2 complex subunit sigma, putative	AP2S	16.3274	16.0133	14.8504	28.5736	13.7767	23.3291	16.785	6.54231	24.9977	31.5532	51.5375	52.3577	42.398	16.0329	62.4716	22.8528	46.4669	44.2338	38.6832	72.6172	27.9963	35.4848	34.775	26.4141	20.7552	19.6358	16.0474	15.699	18.72	26.5413	18.8501	25.4287	33.8883	30.121	42.0994	31.1939	43.5245	44.596	28.3558	44.641	29.7952	30.8219
PF3D7_0217400	NA	NA	6.30826	5.84463	8.21773	6.67935	8.04711	9.52849	26.6608	30.0412	41.3774	55.0448	65.4883	80.9025	86.6606	50.0062	89.3051	15.4562	62.6787	53.3972	9.21646	9.95114	6.29968	7.45979	8.01805	5.32508	7.03293	5.75795	12.5747	11.9012	17.8405	11.7648	35.3303	17.8566	25.4455	16.7451	77.7356	33.8446	145.471	87.3629	50.5084	62.5644	56.7909	37.4216
PF3D7_0217500	calcium-dependent protein kinase 1	CDPK1	3.8194	3.50183	4.01669	3.06223	2.16364	1.2019	2.01776	2.25214	2.491	3.18231	6.88378	9.07436	59.4507	52.6295	72.1799	27.9148	128.389	137.788	2.92345	2.9526	2.41894	3.38746	1.51707	3.02262	1.49701	2.12441	2.70072	2.0266	0.723331	0.333897	0.509851	0.180996	0.277757	0.452612	2.84672	0.649016	10.6117	2.51295	7.94347	4.08397	80.9248	3.8828
PF3D7_0217600	NA	NA	5.78645	5.51386	6.00333	4.83227	4.97916	4.28717	9.80281	11.7477	8.68065	10.5635	11.8284	16.4109	18.0103	14.5762	18.5408	8.25943	16.5528	15.082	3.9658	5.43583	3.54976	3.81114	4.23599	4.34217	5.09101	5.16465	4.40979	4.35287	8.1676	6.65941	11.0031	8.94137	11.8038	9.40902	15.8865	9.16056	13.3295	14.3419	7.34009	14.1112	12.3124	12.9301
PF3D7_0217700	NA	NA	8.53271	13.176	9.84185	6.18961	16.3808	19.8026	24.417	22.2818	31.005	27.4682	26.1437	27.3372	8.76447	11.009	11.4888	8.46354	8.63934	9.57771	11.6873	9.75096	5.40401	3.15322	6.77838	8.28736	8.91835	8.57934	10.9896	10.3486	31.9959	22.0053	44.4221	34.7743	47.1595	48.5354	44.9154	40.308	16.669	34.0585	16.5222	29.3547	15.0033	34.1871
PF3D7_0217800	40S ribosomal protein S26	RPS26	1804.44	1584.02	1712.58	1962.8	1844.69	1957.26	2093.31	2033.97	2305.91	2591.85	2373.35	2436.16	2053.78	2061.08	2105.25	1942.41	1955.99	1805.84	1671.69	2220.96	1920.25	1906.03	1801.62	2269.45	2536.69	2213.55	2391.73	2135.44	2284.82	2034.57	2325.61	2305.18	2468.85	2444.42	2434.67	2549.82	1400.84	2346.23	2299.09	2021.51	1447.44	2102.31
PF3D7_0217900	NA	NA	0.361512	0.372158	0.915715	0.736112	1.09222	1.06178	59.7567	62.0422	56.9457	80.3227	88.7859	101.194	128.119	101.495	136.662	41.8723	102.488	89.3863	0.776727	0.388825	0	0.142501	0.306331	0	0.503801	0.412468	0.876436	0.682029	5.25806	4.3824	12.5257	6.39577	14.8626	8.56807	43.83	23.4582	22.7667	27.4008	61.1168	14.3417	47.547	57.1878
PF3D7_0218000	replication factor C subunit 2, putative	RFC2	1.7038	1.46165	0.616537	1.38772	6.29156	4.52755	204.557	232.954	201.5	153.03	168.962	149.817	289.107	352.662	274.997	148.008	233.079	264.247	0.244047	0	0.166812	0.671607	1.44373	0.435835	4.15522	0.907181	3.67168	1.98986	26.6168	28.0686	67.3897	44.7842	72.03	36.4328	64.906	94.7053	83.1042	79.9816	165.672	67.029	145.931	213.918
PF3D7_0218100	NA	NA	0.176017	0.543602	0.764321	0	0	0.221558	0.495938	2.13511	4.72311	2.55983	5.32961	6.69107	22.2521	18.3133	20.314	5.29284	32.2216	25.1424	0	0	0.465294	0	0	0	0	0	0	0	0.213342	0	0.751887	0.533836	0.819226	0	4.98527	1.53139	5.13491	2.22354	4.98198	1.30928	7.92308	4.21032
PF3D7_0218200	NA	NA	6.43682	6.82597	9.42914	2.46342	5.70143	5.85703	19.3379	21.3229	27.1683	22.7449	17.3319	9.64815	29.0202	21.9009	18.6164	8.42109	34.9262	22.8678	7.99798	3.41986	4.92013	4.2186	5.52002	6.33822	3.64757	5.14973	5.95379	6.27042	14.5696	11.7153	18.9932	13.4067	17.9571	17.4981	9.01712	23.1091	4.63256	10.0145	3.67816	17.9981	9.2726	29.9033
PF3D7_0218300	NA	NA	1.58862	2.18053	0.958092	1.94085	3.19975	3.7771	30.0887	32.3547	41.8383	40.2169	42.757	46.3594	44.6295	40.228	43.7301	14.4489	40.319	36.4191	0.910192	2.84773	0.622139	0.626202	2.24355	3.04778	3.32083	4.59176	4.84989	3.56796	7.27406	6.1724	16.0854	10.4391	19.7168	11.8811	38.4157	25.531	55.1719	45.0915	40.6432	50.4181	42.5824	38.6752
PF3D7_0218400	ATP-dependent RNA helicase DDX47, putative	DDX47	33.9466	33.2563	29.723	35.6262	38.3345	36.005	37.7882	39.4525	42.3094	52.2013	47.8227	41.6684	22.5129	19.4838	25.0051	28.076	23.6201	24.5446	38.3093	47.4049	36.5811	30.0088	27.869	42.9197	45.1363	34.7441	46.8609	39.8661	40.8753	44.2132	48.9701	47.0895	50.7658	49.3813	42.9711	52.4112	14.8432	37.4934	31.5875	32.6191	16.0476	41.1059
PF3D7_0218500	small nuclear ribonucleoprotein Sm D2, putative	SNRPD2	357.543	358.585	328.785	397.789	391.011	381.228	473.406	419.793	482.632	422.89	533.24	497.493	484.624	465.682	598.393	495.694	461.781	397.707	461.711	471.775	393.541	477.295	428.683	423.591	475.796	425.182	429.931	402.837	395.385	369.497	470.612	456.482	447.474	435.056	545.797	486.38	441.219	598.427	545.14	452.396	395.785	581.328
PF3D7_0218600	NA	NA	23.9753	25.887	25.9128	12.2823	25.603	20.2736	55.1313	53.7733	58.5741	62.5776	44.4728	23.8284	53.5657	46.766	46.2072	24.4445	55.4672	43.2201	18.0151	10.5581	14.6791	13.6002	17.1936	19.1157	25.7465	26.4299	24.1814	24.9601	47.656	43.5479	63.4798	59.7435	64.9494	63.3972	68.5359	67.5742	22.6306	53.0822	26.8161	81.7494	50.8282	64.286
PF3D7_0218700	pre-mRNA-processing protein 45, putative	PRP45	52.413	58.0968	55.2083	31.7001	53.0459	39.8456	63.786	62.0738	70.5913	56.2879	46.5778	24.2103	56.9118	54.6349	50.308	45.0799	70.8274	47.9001	72.7518	49.2566	53.3858	60.5999	45.6769	54.3594	38.51	48.1367	52.4209	59.3714	75.9498	74.2196	78.1402	79.2841	68.8353	84.0037	56.277	84.372	44.1553	67.012	26.6966	82.2197	51.7368	75.3471
PF3D7_0219100	NA	NA	3.66874	4.07892	5.73509	5.73719	13.7445	10.3442	11.1638	10.0872	11.8133	14.9393	16.081	16.3974	2.96833	4.36236	2.93561	2.20638	4.04147	3.8001	2.83769	4.41943	3.10341	2.42953	2.42482	3.20956	4.44808	8.4387	10.6732	8.30574	9.42702	9.23692	17.3433	18.0254	20.661	16.6947	27.7818	12.1291	18.7553	27.8072	11.3382	22.2682	7.53458	10.5307
PF3D7_0219200	40S ribosomal protein S30	RPS30	5092.62	5109.48	4416.98	6098.5	6416.52	7065.3	7653.16	7256	8810.86	6158.98	8910.92	7192.55	6106.45	6873.86	6542.1	6901.83	6434.84	5490.72	6530.82	5366.58	6745.57	8517.8	5826.31	8875.74	10112.7	8669.5	11146.5	7752.61	7484.27	7313.41	9568.13	8893.5	8297.04	8618.8	7369.75	9349.95	10929.8	9303.66	10231.2	9110.38	7941.94	8731.07
PF3D7_0219300	NA	NA	5.81862	6.91151	3.40123	9.84287	8.56442	12.3946	6.30549	7.23903	12.6774	13.0185	23.8781	30.4197	27.1602	21.4362	37.8807	10.4681	36.9795	26.1717	3.46198	10.1095	5.52148	8.46864	5.1201	0.515219	4.67815	3.98327	1.44682	3.61893	4.88248	4.3824	7.01045	6.10861	9.89508	3.39459	20.016	5.84114	33.5761	13.8212	12.3261	12.6514	14.7956	8.99325
PF3D7_0219400	NA	NA	448.464	502.304	442.16	535.139	585.28	640.277	630.055	636.727	979.916	952.247	1392.45	1479.03	2128.77	1459.95	2504.18	1026.28	2498	2137.86	560.705	751.932	597.619	658.914	586.413	598.968	818.035	816.72	726.316	681.494	804.918	777.662	812.638	818.874	814.889	855.553	1016.5	906.617	1164.92	964.036	1315.86	957.8	1724.43	1098.59
PF3D7_0219500	NA	NA	0.184844	1.56987	0.401325	0.451656	3.35078	3.25736	53.9036	63.5283	80.4616	79.7498	89.5501	82.8288	93.0044	75.7058	99.5524	34.8936	107.501	88.0109	0.714863	0.397619	0.325751	0.437172	0	0.212775	0.772792	0.632695	1.34439	1.19563	11.8742	11.1176	30.0045	24.947	35.0575	18.9256	36.3713	51.8638	23.3671	38.139	59.1054	41.7982	48.8823	74.2805
PF3D7_0219600	replication factor C subunit 1	RFC1	1.45404	0.801888	1.35297	1.0151	3.13788	3.66048	112.76	124.117	103.218	102.29	118.702	129.211	134.451	148.995	147.672	62.8084	123.385	111.049	0.624814	0.67024	0.244044	0.491275	0.52804	0.717322	1.44738	1.27979	2.12626	1.56754	14.4346	10.9439	34.3093	25.8294	34.9651	20.4801	42.3175	60.6919	11.0615	35.7644	86.9181	28.4298	42.6599	115.736
PF3D7_0219700	Plasmodium exported protein (PHISTc), unknown function	GEXP20	5.5041	2.28827	2.06831	1.29317	1.27918	1.86528	11.6311	7.98902	9.46749	7.95333	7.63088	8.29123	1.87338	2.09767	1.95453	21.2191	1.71473	3.18304	24.8343	67.3964	17.721	33.2952	23.9476	18.52	4.20402	3.76795	5.13228	4.27914	6.92785	6.81049	3.31575	5.13637	5.17275	4.21456	4.73352	9.209	1.47042	5.94279	5.18213	5.35391	3.12674	5.06376
PF3D7_0219800	NA	NA	24.4774	35.5295	26.9972	18.182	31.3559	17.2538	30.0693	27.9758	17.8068	15.1883	11.576	9.0228	23.5176	31.0455	27.7218	23.226	39.336	32.551	14.6413	7.16086	7.93713	12.736	12.9425	16.2294	24.3556	25.604	35.7635	32.4573	32.9907	32.868	34.5743	35.0397	30.3037	33.7868	11.676	25.1291	4.89651	8.24562	8.23878	13.4005	9.91623	23.2326
PF3D7_0219900	NA	NA	25.4989	28.6932	26.2086	30.1583	24.5869	32.4377	2.29291	5.48411	8.89644	6.57502	11.3426	12.1866	7.20158	8.06376	12.94	15.4075	18.8962	10.1967	33.9204	78.1914	33.4635	48.1173	33.4444	20.6088	13.3257	24.141	16.2219	17.7657	20.7136	25.8012	12.7463	20.1564	15.1504	23.4021	14.9615	15.3404	1.13051	16.3722	3.73517	6.86042	4.19734	7.52682
PF3D7_0220000	liver stage antigen 3	LSA3	387.629	377.207	397.021	241.158	263.152	200.399	231.422	247.678	213.968	166.302	177.28	115.983	312.55	367.939	297.311	479.423	304.407	292.236	635.355	429.322	512.871	505.918	496.727	553.542	261.641	344.412	287.623	354.298	283.338	321.807	170.149	184.865	167.008	179.321	116.595	173.273	36.6287	77.4034	140.268	78.3319	149.348	180.134
PF3D7_0220100	NA	NA	24.6128	23.754	21.4707	28.6892	29.9723	25.4486	16.2755	12.9476	10.8576	14.3056	11.1353	16.7076	7.3026	5.70308	6.47333	21.5025	5.08578	4.72034	22.3398	33.9008	26.7775	26.5069	24.9791	24.8627	34.2565	28.1537	29.9874	31.2214	27.9294	25.1176	24.7646	26.8501	26.3737	23.8097	21.6205	18.6413	7.93734	27.3201	10.3266	17.9343	6.44742	19.5244
PF3D7_0220200	NA	NA	380.127	326.368	352.149	451.298	681.269	658.016	838.387	756.365	718.399	952.415	787.689	1004.97	465.238	360.196	416.593	345.851	378.007	354.546	248.587	497.095	311.461	332.839	362.587	251.86	373.787	414.984	476.73	398.882	789.29	626.611	1180.12	1049.45	1237.07	1110.65	1346.42	989.444	826.725	1323.19	664.465	1065.09	610.922	813.533
PF3D7_0220300	NA	NA	11.7675	9.99411	12.7746	4.67241	18.6652	15.9231	14.5056	9.51609	4.38557	4.63493	2.96924	4.4055	2.60339	8.74521	1.81077	4.42313	4.28925	4.66912	0	0.63283	1.0369	0	3.36532	5.07963	9.8395	7.65294	14.2644	10.7039	34.944	19.7517	51.5237	47.7345	46.2113	48.5283	10.0863	28.4744	5.72153	4.95511	0.450091	12.2544	1.8622	10.9777
PF3D7_0220400	NA	NA	0.748204	0.361049	0.304587	0.228524	0.659319	0.35317	0.39527	0.252105	0.139422	0.566728	0.2697	0.107735	0.118235	0	0.143916	0.31248	0.151511	0.624995	2.77303	1.10651	1.07133	0.55299	0.594373	1.72252	0.195505	0.38415	0.22674	0.151239	0.226716	1.04654	1.46487	1.7019	1.63234	0.886646	0.139415	0.915403	0	0.131273	0	0.556543	0.197338	0.53691
PF3D7_0220500	NA	NA	19.1212	33.0838	36.013	3.65891	21.5768	14.209	7.14004	8.38343	3.09086	3.35036	2.32517	1.59226	4.95108	7.60919	6.73547	14.2397	41.7992	32.7146	8.01856	0.743342	3.65392	1.907	7.3204	7.16003	11.7986	14.8246	28.1118	28.1265	65.8976	53.4911	74.1346	66.3763	56.0236	63.5549	5.83801	36.3282	0.320033	3.23357	2.291	6.51176	5.02293	9.25775
PF3D7_0220600	NA	NA	145.01	134.438	161.333	126.012	244.327	152.165	132.415	104.261	59.9328	56.4521	69.961	93.2623	39.6087	92.0375	40.532	95.4169	32.7894	40.2997	8.22093	14.6125	5.86352	12.7873	60.2631	60.6408	177.356	143.116	273.807	157.6	197.94	198.953	420.853	433.489	263.254	324.363	138.872	177.302	58.5462	144.383	48.9952	98.9957	35.2967	113.278
PF3D7_0220700	NA	NA	11.6408	12.4298	8.87277	16.9451	17.9591	15.5879	6.62949	7.34394	5.90751	8.10443	7.14226	12.8388	2.19178	2.86322	2.66785	5.79261	2.80864	2.06891	12.7715	29.0364	11.1303	9.95818	7.55535	15.6806	9.83707	10.5122	10.2078	11.2144	11.7077	9.00731	13.4012	11.6431	8.93377	11.2706	8.12245	8.34998	4.47287	8.69103	6.44182	9.58002	4.00656	7.82021
PF3D7_0220800	cytoadherence linked asexual protein 2	CLAG2	0.782733	1.74586	1.13296	0.31876	0.175174	0.492625	2.26665	3.75096	2.59299	3.89984	4.57705	4.25781	51.6754	36.7691	57.814	13.5119	96.7219	90.3385	0.504522	0.654788	0.306536	0.411384	0.0552713	0.400448	0	0.267918	0.210848	0.210958	0.42165	0.729894	1.17644	1.05508	1.26494	0.948176	1.68537	1.18228	1.51022	0.732435	2.32854	0.776302	20.9503	2.91246
PF3D7_0221100	NA	NA	0	0	0	0	0	0	0	1.23292	0	4.43454	0	0.526879	1.15646	0.755365	0.703822	0	1.48193	1.52827	0	0	0	0	0	0	0	0	0	0	0	0	0	0	0	0	0	0	0	0.641994	1.74944	0.680445	0.965083	0.875255
PF3D7_0221200	NA	NA	2.42172	4.20701	6.2438	1.47934	11.2799	7.62075	39.2342	45.6956	54.6035	56.8644	25.7518	25.1069	11.0981	7.49891	10.7137	3.53993	11.7695	9.35605	1.56096	0.651173	0	1.4319	2.69334	2.09074	2.21478	5.38799	7.33892	5.13993	31.1871	25.4052	61.2068	43.1505	82.4212	57.9704	45.576	53.6614	29.0163	46.7384	10.8837	38.7295	14.4778	52.4244
PF3D7_0221400	NA	NA	0	0.15708	0	0.248557	1.02445	0	2.29291	0.274206	0	0.986253	0.586686	0.703076	0	0	0	0	0	0	0	0	0	0	0	0	0	0	0	0.164497	2.71249	0	3.47626	0.617032	2.13052	2.50737	1.21309	2.65506	0	0.285562	0.155632	1.21066	0.143091	1.16795
PF3D7_0221500	NA	NA	0.554532	0.64222	0	0.677484	0.837694	0.698006	2.34363	1.12109	2.89331	3.36024	0.799554	1.27757	0	0	0	0	0	0	0	0	0	0	0	0.638325	0	0.379617	0.896257	0.672544	3.02455	3.87823	5.92194	6.72728	6.12969	5.2571	5.78635	3.31687	2.69621	2.72421	0.636302	6.18723	1.17006	1.85701
PF3D7_0221700	NA	NA	1.39531	1.56698	2.34093	0.464913	0.255491	0.798327	1.25089	1.19674	0.567283	0.614911	0.91447	0	0	0	0	0.211904	0.616471	0.423832	1.63521	0.13643	0.447084	1.05001	0.48368	0.584054	1.06063	1.2157	0.922565	1.43585	2.15242	2.66138	2.16738	2.69296	1.77112	2.76583	0	1.93128	0	0.178043	0	0.943532	0.535289	1.0923
PF3D7_0222100	Pfmc-2TM Maurer's cleft two transmembrane protein	MC-2TM	2.99688	1.47245	0.887277	4.65991	9.8775	11.3168	16.1201	15.0551	29.6483	30.3766	24.7479	49.9	2.06654	0.899869	0.838466	1.3654	2.20679	1.59306	0.702431	0.879083	0.240065	0	6.57945	1.88167	2.84757	4.66269	5.50419	5.28678	28.0684	16.0053	68.6636	50.8166	65.303	52.6899	95.4388	52.4433	29.521	74.9514	15.0057	27.561	7.66472	33.3662
PF3D7_0222300	exported protein family 4, pseudogene	EPF4	17.9035	25.1174	27.2572	17.3384	15.6117	15.1154	11.0731	12.9479	6.83507	9.79037	6.29614	1.00603	2.20815	3.96632	0.671941	19.3313	3.89071	2.55333	33.7754	21.3696	27.896	34.3393	29.4163	21.3627	14.8332	21.822	17.2912	27.8922	34.667	25.6531	31.3994	23.8385	23.6262	29.5991	9.76392	20.4202	6.67275	3.98394	4.34252	12.6677	8.13875	7.93829
PF3D7_0222600	rifin	RIF	0.509448	0	0	0	0.684079	0	0.717698	0.686629	0	0.823214	0.4897	0.195616	0	0	0	0.283687	0	0.283704	0	0	0	0	0.863371	0.195476	0.177491	0.348754	0.823391	0.686518	1.02913	0.712586	0.725398	1.8026	1.77832	0.64396	0.506277	2.03147	0.47181	0.238356	0.389713	0.505263	0.35831	0
PF3D7_0222700	rifin	RIF	0	0	0.389825	0	0.542461	0.678006	0.758827	1.20996	0.267658	1.30558	0.258881	1.86144	0.226984	0	0	0.299945	0	0.149981	0	0.772451	0	0	1.14106	0.413356	0.562987	0.737479	0.725481	0.580688	2.17621	2.26027	1.78959	2.45045	3.96937	2.89367	2.40881	1.5621	0.249424	1.26007	0.137349	1.60265	0.378843	0.858954
PF3D7_0222800	NA	NA	0	0.158625	0	0	0	0	1.44716	1.38451	1.83762	2.48988	1.77737	0.236664	0	0	0	0	0.332827	0.343235	0	0	0	0	0	0	0.214735	0	0.166028	0.166115	1.49409	0.574741	1.17015	1.2462	1.91242	0.584314	0.612512	0.893726	0	1.15348	0	0.611285	0.433496	1.57259
PF3D7_0223100	rifin	RIF	1.13587	4.23878	2.46615	4.16315	12.9644	13.3444	21.0691	18.6261	17.215	33.7263	22.9286	31.8388	0.717982	1.25057	0.29131	1.58128	0.920051	0.948821	0	0.203614	0.166812	0	4.09058	2.39709	6.33176	4.40631	7.80231	5.96959	19.7332	14.0343	54.7204	45.0713	64.1001	44.5091	55.8756	45.088	21.828	39.5922	13.9025	39.1472	13.5811	21.1925
PF3D7_0223200	rifin	RIF	0	0.139828	0	0	0	0.455923	0.510271	0	0.269979	0.438968	0.261126	0.417239	0	0	0	0	0	0	0	0.194787	0	0	0	0.20847	0.189289	0.123979	0.146354	0.439292	0.658524	0.759954	1.80511	0.823898	1.47508	2.74706	1.61979	1.37869	0	0.7626	0.415619	0.808274	0.509504	0.519841
PF3D7_0223400	rifin	RIF	1.91043	2.36003	1.65914	4.20122	9.81226	9.13793	11.3037	8.23954	6.83507	16.207	11.5692	19.1459	0.724549	0.631006	0.293974	1.91489	1.54744	1.915	0	0.205477	0.168338	0.451833	7.52752	3.29866	5.59096	4.70818	10.1895	7.56886	34.0385	20.3087	46.5161	49.8291	50.4598	48.9007	31.6107	39.6829	7.16562	11.2623	6.13798	16.4842	7.12141	10.2362
PF3D7_0223500	erythrocyte membrane protein 1, PfEMP1	VAR	1.38098	1.55493	1.21807	0.667841	0.318719	0.796714	5.0664	4.69196	4.28892	3.34728	2.77935	3.04903	8.54732	9.74032	8.94287	3.2202	12.1647	10.1658	0.815955	0.216609	0.253512	0.272179	0.182842	0.331179	0.270637	0.452996	0.44175	0.20936	2.09228	1.12679	2.78569	1.65788	2.57767	2.67296	1.75837	3.12886	0.839316	2.74601	2.26689	1.11283	3.52091	5.23023
PF3D7_0300100	erythrocyte membrane protein 1, PfEMP1	VAR	5.01864	6.12967	4.09378	3.42942	3.91202	3.78313	15.6981	16.5471	15.0475	12.7829	13.532	11.3336	40.6123	43.0797	35.4717	17.2415	59.805	57.7671	3.54553	2.47018	3.27292	3.21885	3.2435	3.32911	2.28192	3.18329	4.26189	3.00322	8.66033	9.9546	16.4721	13.286	17.0566	12.1499	8.91815	15.8803	3.19048	13.2527	12.9055	7.5083	18.9849	19.9398
PF3D7_0300200	rifin	RIF	1.72464	2.5152	1.24816	3.74584	9.84226	7.95983	14.0379	8.78129	4.85631	11.8441	8.84155	15.4519	0.969019	0.316468	0	2.88112	1.24174	0.480214	0.494065	0	0.168853	1.58625	4.38418	1.10292	2.80403	4.46021	7.58804	4.64817	26.9424	19.8347	44.4755	37.1955	47.7155	33.9718	39.7056	35.6363	7.98615	15.3313	5.27722	17.3898	6.4693	12.4677
PF3D7_0300400	NA	NA	2.32082	2.28057	3.66462	1.28882	10.624	8.23272	42.8009	40.948	19.8148	29.9163	14.602	20.9013	0.266725	1.0453	0	2.11476	0	0.35248	0	0	0	0	3.48619	1.45719	5.29246	3.75527	10.571	5.80004	20.7136	20.0676	63.9889	55.67	64.5644	34.6031	31.7651	37.4003	14.9478	22.2104	9.68378	17.2631	8.75507	16.1495
PF3D7_0300500	rifin	RIF	0	0.671952	0.377914	0	0.175295	0.438193	0.245214	0.938392	0	0.210949	0.250971	0.200507	0	0	0.267843	0	0	0	0	0	0.153375	1.02918	0	0	0	0.238315	0.56265	0.140736	0.421943	0.486934	2.97413	2.11162	3.24049	3.79534	0.778401	1.70367	1.45082	0	0.399456	0.517894	0.367268	1.16579
PF3D7_0300700	rifin	RIF	0.169816	0.262225	0	0.414936	0.513059	1.92377	1.19616	0.228876	0.506301	0.205803	0.4897	2.93425	0.214681	0.560894	0.261311	0	0	0	0	0	0	0	0	1.17286	1.41993	0.465005	0.548927	0	2.26408	3.3254	2.65979	3.86272	4.14941	5.47366	5.06277	3.13955	0.47181	2.1452	0.259809	0.757894	0.119437	1.13736
PF3D7_0300800	rifin	RIF	1.16762	0.601001	1.26754	0.475501	2.1558	3.18438	3.83813	1.5737	1.1604	3.53765	2.5253	3.13837	0.246017	0	0	0.325095	0	0.487671	0	0	0.514424	0	1.23674	0.224008	2.03398	0.532878	2.35894	0.629379	4.24564	4.08298	9.97535	10.0335	9.28371	6.64158	8.12245	7.61888	3.5144	3.82405	1.19092	4.34259	0.13687	2.79293
PF3D7_0300900	NA	NA	0	0	0	0.352791	0.290812	1.09043	1.22042	0.77839	0.860945	0	0.416358	0	0	0	0	0	0	0	0	0	0	0	0	0	0.301816	0.197681	0.233357	0.933917	1.4	1.21172	5.75638	1.75157	3.02396	3.01133	3.44362	5.02464	0.802295	0.810629	0.662692	3.43672	0	1.93403
PF3D7_0301000	acyl-CoA synthetase	ACS2	0	0	0	0	0.230877	0.0961887	0.107655	0.102994	0	0	0	0	0	0	0	0.255319	0	0.0638333	0.689582	1.39724	0.269341	0.451833	0.291388	0.351857	0	0	0.123509	0.247146	0.0926217	0	0	0	0.088916	0	0	0	0.530787	0	0	0	0	0
PF3D7_0301200	serine/threonine protein kinase, FIKK family	FIKK3	5.74317	6.65134	9.57465	6.01419	4.95761	3.74364	0.433438	0.829348	0.611539	0.12429	0.147872	0.354415	2.59304	0.846849	1.73594	8.56634	1.16299	1.97037	15.7328	34.3049	16.447	22.8002	13.8175	12.8678	3.32294	4.49327	3.72952	3.64854	3.2319	3.58625	0.292059	0.622081	0.715985	0.972263	1.98741	0.557665	0	0.575799	0	1.22057	1.1541	0.686882
PF3D7_0301300	epoxide hydrolase 1	EH1	9.87143	15.0223	17.5497	13.808	18.442	24.4908	8.868	9.64102	13.0095	15.7778	9.07622	11.536	4.34068	2.8352	2.4216	5.97493	4.86703	4.06318	13.8321	21.5422	13.4886	13.3652	12.0014	12.8452	15.2521	15.5721	16.0702	15.1532	26.357	24.4134	20.3708	25.3828	23.1385	19.2592	26.6576	19.2927	9.73836	16.0645	6.89472	17.4523	4.42734	11.4982
PF3D7_0301400	NA	NA	5.64986	7.53468	4.46063	6.27505	11.6385	13.9001	7.95939	8.65321	10.3366	14.0056	20.3657	30.7663	18.181	6.7859	18.1782	6.00627	8.73671	7.72278	0.662128	3.59079	0.678871	0.911073	7.18119	3.25179	10.4683	10.021	6.22605	5.60637	25.5241	21.1936	22.6717	26.4818	28.3875	42.8497	29.0943	18.7124	11.4163	29.1976	10.4121	17.1924	9.39242	15.7259
PF3D7_0301500	NA	NA	19.1284	22.2381	21.4814	28.7419	26.3496	29.3359	8.98256	9.4827	11.144	11.7243	9.8275	19.2486	19.1789	5.44658	22.3297	16.5285	26.0014	11.7543	43.0824	91.5172	31.1915	50.7004	32.4173	18.7287	7.58353	13.5463	10.6607	14.9328	27.4485	27.3708	13.4619	14.3368	12.0239	16.0498	10.4879	16.2595	9.77393	10.1841	5.04576	7.196	5.87628	14.7258
PF3D7_0301600	Plasmodium exported protein (hyp1), unknown function	GEXP21	105.662	91.6789	90.0188	115.095	102.02	88.6668	95.7437	86.1836	66.3956	83.401	69.6419	95.2257	16.319	16.5181	13.9439	82.5449	14.5413	12.0682	96.0979	162.193	112.012	119.895	115.177	114.543	97.2137	99.4291	106.873	103.68	113.666	105.823	141.2	127.432	128.117	132.021	116.856	109.053	34.9146	106.912	62.8449	80.6304	25.7338	90.8731
PF3D7_0301700	NA	NA	247.89	228.362	231.455	266.982	340.933	376.763	259.279	234.51	242.344	315.706	367.081	388.832	257.83	209.573	263.194	188.294	232.712	203.448	26.9265	12.2924	20.8358	25.6323	210.636	212.536	501.298	339.936	475.493	323.587	755.437	621.254	1027.76	1160	1021.9	1365.95	715.248	808.973	199.282	484.572	262.284	463.173	230.478	491.518
PF3D7_0301800	NA	NA	9.95793	14.4392	9.22814	8.01164	11.7407	8.25433	13.6863	14.0759	23.1721	16.7778	12.9571	8.67308	13.817	10.0276	16.8181	69.7871	32.2636	29.012	162.812	233.536	145.313	181.231	67.6065	116.304	16.5005	27.6002	26.3006	28.2781	22.3728	32.2735	39.7704	42.3552	40.9772	41.6758	9.05118	24.8286	3.71139	13.6362	8.36071	11.5623	5.63713	14.6402
PF3D7_0301900	NA	NA	0.157048	0.242509	0.170488	0.575606	1.10713	1.18609	5.08864	3.81001	5.85292	6.85186	9.05761	15.1963	7.34597	2.59361	10.3915	2.88593	6.36042	4.98508	0	0.50674	0.138383	0.185716	0.598842	0	0	0.430042	0	0.25396	3.0456	0.659008	2.90705	2.38153	4.02016	3.42436	17.5579	8.53968	13.3082	15.21	2.64302	7.71001	4.3078	8.11421
PF3D7_0302000	pre-mRNA-splicing factor PRP46, putative	PRP46	45.7715	60.7776	56.9324	29.9344	46.5159	38.5843	91.3614	98.0862	84.0869	78.8477	51.8646	33.6291	87.6531	96.4252	62.8919	53.995	85.6351	83.0003	55.1075	32.6328	39.5048	45.3728	42.2747	31.9247	38.1414	50.2484	46.5942	45.9441	72.9168	68.8351	87.7393	86.6431	88.4396	89.5527	41.4975	86.8558	37.3688	43.6108	50.8858	51.4964	55.4385	99.8585
PF3D7_0302100	serine/threonine protein kinase	SRPK1	79.3221	85.0906	84.6878	50.3129	71.024	55.7248	84.9805	91.8349	95.1567	79.0041	62.0774	37.412	69.4557	66.0016	45.9434	53.943	57.1622	63.1325	64.2496	29.596	38.1432	37.244	48.0017	63.6732	73.9561	66.3474	71.0604	86.9516	112.365	115.729	129.138	130.931	116.908	136.512	39.1352	127.59	7.67124	35.0762	28.8897	42.1896	34.0333	104.194
PF3D7_0302200	cytoadherence linked asexual protein 3.2	CLAG3.2	0.53066	0.204858	0.144018	0.378186	0	0.278316	0.373791	0.0596015	0	0	0.0637612	0.152821	1.56534	1.02243	2.17753	0.664874	2.43572	2.54883	0.513067	0.0475627	0.350694	0	0.0562075	0.0509038	0.0462203	0.121092	0.250155	0.786613	0.267995	0.247419	0	0	0	0	0	0.0961844	0	0.06207	0.135313	0	0.12441	0.0423112
PF3D7_0302300	NA	NA	3.62628	1.67988	2.36196	1.24048	0.584317	0.730322	1.22607	2.34598	2.37856	1.05474	0.209143	0.334178	0.183373	0.718646	0.223203	0.484633	1.17491	0.48466	1.12194	1.09207	0.894685	0.857646	0.368731	0.500908	0.758034	1.09228	0.937751	0.703681	1.23067	1.21733	3.30459	1.97964	2.53164	3.16278	0.216223	1.41972	0	1.22157	0.44384	0	0.102019	0.416354
PF3D7_0302500	cytoadherence linked asexual protein 3.1	CLAG3.1	12.1524	16.7524	13.6241	5.77677	4.18335	2.94807	7.03476	5.53903	6.32412	5.40909	35.3625	33.1388	394.858	405.62	418.062	170.014	855.194	808.774	7.97541	7.41455	8.21603	8.7792	3.81941	4.73072	2.2632	3.26717	1.60701	3.28715	1.60684	2.03976	2.13936	2.01036	1.90248	1.92711	2.23969	1.29757	7.79635	0.930394	18.153	0.59167	168.363	8.6254
PF3D7_0302600	ABC transporter B family member 4, putative	ABCB4	0.229363	0.318759	0.248992	0.112087	0.461979	0.519672	10.4691	12.3653	16.5489	14.3989	12.0378	9.61728	20.4133	11.7424	17.2235	3.21859	19.3215	15.634	0	0.098677	0	0	0	0.105609	0.143838	0.251225	0.518989	0.18545	2.3352	2.75905	6.00922	5.00853	6.5652	5.00118	6.22265	12.2724	3.5049	6.95384	4.80751	9.69061	6.06556	13.2989
PF3D7_0302700	NA	NA	1.63822	1.89728	4.00144	2.50182	2.47476	4.63969	47.3118	38.6397	20.7584	16.3795	20.6682	30.194	64.2023	75.0773	47.8967	28.0517	55.0687	39.0009	2.11188	0.440499	1.08264	2.42159	0	1.41433	2.99646	1.96259	2.97874	6.29173	5.46044	8.59295	17.4949	19.253	27.163	12.0364	12.8207	17.3707	4.55158	18.9703	19.7378	9.13931	19.5876	36.8351
PF3D7_0302800	NA	NA	9.69771	12.0951	10.6896	9.84287	17.4294	14.2726	14.2924	16.2878	13.7895	13.9226	19.3606	19.2486	8.29896	5.42064	9.1832	7.72643	7.25088	6.4806	11.3476	15.8863	8.0193	7.23363	8.91276	10.1326	10.2919	14.6053	13.6242	15.8027	19.8916	13.982	16.7826	15.6109	16.1446	18.1045	9.78562	21.093	2.48711	14.24	7.87499	8.43428	2.83321	17.2727
PF3D7_0302900	NA	NA	39.7942	40.0152	36.8037	39.7723	46.1606	46.1307	64.0095	64.8052	72.2738	75.6389	100.716	110.546	113.745	87.1582	124.313	66.0614	95.8502	96.8873	46.0218	64.1205	45.1838	49.361	46.5183	44.6003	40.1837	42.5891	42.0038	41.3798	40.9705	45.7446	44.5764	40.3563	48.3363	45.3468	85.221	54.8431	55.4894	81.2954	80.7824	59.0523	80.6994	80.1151
PF3D7_0303000	N-ethylmaleimide-sensitive fusion protein	NSF	2.15801	3.14721	3.12358	1.66001	1.93182	0.704239	9.23304	10.126	9.5319	9.20209	8.64314	12.6135	13.5397	14.1236	11.93	5.47437	15.926	14.2876	3.70927	3.00877	2.25367	1.79581	2.03179	2.20808	2.08846	1.53203	1.74393	2.77882	4.26249	6.03698	6.37314	6.90855	6.69592	5.83445	2.97858	7.2145	1.77651	1.68278	5.31929	1.90247	3.37287	8.33558
PF3D7_0303100	NA	NA	1.52092	1.7111	1.03782	0.530899	1.1816	0.656378	2.69361	1.87418	3.69245	2.47521	3.94731	3.8544	4.39486	2.58354	6.28559	1.16151	5.91334	5.48116	0.672229	0.373905	0.612647	0.822198	0.607563	0.350149	0.635866	0.624709	0.280935	0.913516	1.42208	1.58034	2.16563	2.17459	1.97194	2.14222	2.00808	3.40261	1.14697	2.25677	0.930771	0.64647	2.0783	4.19934
PF3D7_0303200	NA	NA	5.71125	4.82558	5.67359	2.04061	5.3719	4.4083	32.6389	31.8795	27.2286	20.7647	24.8597	14.7096	78.0594	101.794	67.4053	27.9929	107.098	94.8751	2.1532	0.869257	1.51924	0.892011	0.958765	2.0467	3.041	3.43026	3.83164	4.13859	4.96318	5.95374	8.9761	5.71935	8.52615	5.72089	12.69	16.9341	9.80518	14.6715	10.6751	19.6381	36.4552	31.7045
PF3D7_0303300	DNA-directed RNA polymerases I, II, and III subunit RPABC2, putative	RPB6	77.3104	91.4204	77.7423	62.6364	78.2682	52.2417	196.043	182.621	146.791	162.239	103.843	141.553	147.118	186.811	155.906	103.321	143.04	115.223	67.666	84.9019	54.1392	84.2052	66.7164	51.9903	48.0574	62.9523	59.1879	55.2709	113.431	91.6321	198.147	157.343	141.088	144.656	129.194	161.074	156.575	184.473	108.32	133.173	135.937	166.628
PF3D7_0303400	palmitoyltransferase DHHC1	DHHC1	0.507797	0.392063	0.441002	0	0.409117	0	1.14459	1.09504	0.454194	1.23082	6.29665	5.03054	19.1303	17.1077	21.4101	6.95609	25.8305	26.2141	0.392769	0.218465	0.178978	0.120098	0.387258	0	0.318448	0.278099	0.246217	0.574806	0.24619	0.142055	0.578437	0.154008	0.472681	0.192562	2.11947	0.331345	0.705422	0.712749	2.25301	0.906525	8.85728	2.23495
PF3D7_0303500	NA	NA	0.2251	0.369317	0.213818	0.137505	0.255032	0.212505	10.3459	11.1495	11.6608	12.9922	12.8607	7.26038	20.7025	15.7992	20.523	5.21758	24.2043	18.1686	0.145091	0.151316	0.0743801	0	0	0.0647783	0.147046	0.0770484	0.136431	0.159252	1.60289	1.57428	3.88627	2.1761	4.25615	3.38773	7.63372	8.50685	3.83063	8.96515	4.00353	9.87883	11.4781	14.3763
PF3D7_0303600	plasmoredoxin	Plrx	3.1331	4.83806	6.42454	6.80495	5.96004	10.9548	20.1075	24.8674	28.0238	33.7518	29.6146	38.0963	19.8043	14.3729	18.2133	8.14183	14.0989	14.5398	0.897551	1.12327	1.53375	2.47002	5.75221	7.21307	5.45785	5.24293	6.47048	5.0665	15.6119	8.27787	21.8103	26.3952	21.4683	16.8315	22.8331	18.9296	20.795	28.3405	27.9619	17.0905	15.1804	27.979
PF3D7_0303700	lipoamide acyltransferase component of branched-chain alpha-keto acid dehydrogenase complex	BCKDH-E2	5.44281	6.14186	6.06009	4.26256	17.7091	14.5804	168.493	170.98	203.469	209.727	235.835	246.931	199.367	169.171	217.544	80.9002	207.546	195.734	0.53973	2.25155	1.3527	0.495104	3.72509	3.69489	9.91894	6.49661	9.69914	7.78594	48.2086	40.2127	91.4098	72.5899	117.567	78.4573	154.363	147.828	112.446	168.267	208.393	182.082	173.933	210.31
PF3D7_0303800	NA	NA	0.527459	1.05883	0.343558	0.257763	1.0624	0.796714	18.5768	18.7678	27.6778	17.0037	14.602	14.0962	15.6034	10.8015	13.9603	2.99591	19.8239	19.1221	0	0	0	0	0.268168	0.121432	0.882076	0.794384	0.42625	0.682357	4.85874	5.01689	11.2656	8.63844	15.957	10.6009	9.74967	17.2087	3.81023	8.14382	5.40678	6.74832	4.67432	18.1682
PF3D7_0303900	NA	NA	0.316475	0.488693	0.687117	0	0.318719	0.398357	1.78337	0	1.41534	0	0.912622	0.729115	0	1.56795	2.43494	0	1.02538	0	0	0	0	0	0.402252	1.09289	0.661557	0	0.25575	0	0	0	0	0	0	0	0.471758	2.06505	1.31892	0.444208	1.69466	1.88325	0.667759	3.02803
PF3D7_0304000	inner membrane complex protein 1a, putative	IMC1a	1.30849	1.45927	2.20961	0.0888117	0.366046	0	1.43373	2.54738	1.62551	0.704793	0.52407	1.17234	0.459497	0.840365	0.447441	0.121439	1.17764	0.364339	0.0937118	0.312744	0.128109	0.343854	0.369587	0.0836783	0.227938	0.199057	0	0.117552	0.616761	0.711759	0.621048	0.220471	1.015	0.344578	0.325086	1.2649	0.302955	0.714237	0.333652	1.29774	0.511277	1.39107
PF3D7_0304100	inner membrane complex protein 1e, putative	IMC1e	1.54868	3.49517	1.16392	0.145543	0.119974	0.149952	0.335654	0.481684	0	0	0	0.137229	5.42172	9.64023	6.59933	3.38322	27.7904	31.2468	1.38216	0.89691	1.04971	0.704378	0.302836	0.822784	0.124514	0.326211	0.096271	0.0963213	0.433174	0.333263	0	0	0.277229	0.112938	0.532746	0.259113	0.165492	0.167211	0.0911307	0.177226	4.27315	0
PF3D7_0304200	EH domain-containing protein	EHD	14.9028	15.1303	11.4648	17.3469	13.4721	15.5091	13.225	11.0709	15.5688	13.5102	19.2881	26.2236	23.1421	18.4102	40.2668	20.1912	27.7543	28.8182	14.8247	26.6304	21.1967	18.4558	16.2573	16.0741	21.2181	15.1825	16.4054	15.4652	18.063	13.9515	17.2099	18.3284	13.1076	16.1306	27.2878	13.0168	23.1479	37.0589	24.3264	25.8365	15.1034	20.6586
PF3D7_0304300	NA	NA	0.0438196	0.0338326	0.285418	0	0.132391	0	2.09889	3.42546	5.2912	2.92083	3.03271	0.706681	8.4203	4.12492	3.57374	0.366016	8.44752	6.8815	0.169468	0	0.0386118	0	0.0556965	0	0.0458001	0.0599954	0	0.0354301	0.690452	0.245169	0.873521	0.730945	1.1727	0.498506	1.37173	2.81164	0.791355	1.41463	0.402249	1.04303	1.29443	3.89917
PF3D7_0304400	60S ribosomal protein L44	RPL44	1562.37	1554.63	1758.92	1366.34	1885.38	1641.35	2062.32	2158.84	2105.79	2041.74	2140.86	1728.25	2026.45	1956.36	1755.83	1315.99	1903.6	1512.97	1679.45	1770.28	1764.77	1538.47	1202.27	1602.68	1767.72	1913.19	2061.71	2014.54	2068	1785.52	2191.51	2079.64	2246.36	2250.61	2538.03	2336.46	2046.9	1692.05	1850.74	2489.44	1885.45	1543.41
PF3D7_0304500	1-cys-glutaredoxin-like protein-1	GLP1	1.82157	4.50052	4.7459	0.445091	11.3738	10.5472	132.929	152.216	139.576	104.199	87.7232	89.8084	98.1005	131.161	73.9995	40.7768	92.6594	95.8613	0.939297	0	0	0	1.85223	0.419364	4.95014	3.49159	4.71056	5.59672	34.0008	18.3449	59.1368	48.6164	72.4872	43.8632	71.6853	100.239	89.0734	67.499	63.2627	70.4577	82.7633	103.875
PF3D7_0304600	circumsporozoite (CS) protein	CSP	127.686	152.071	164.934	82.3262	52.3243	65.0023	47.2437	57.7182	71.585	58.9596	60.1574	43.1644	99.3202	79.5638	69.5316	23.1455	86.719	103.898	1.82667	2.87874	3.32954	3.35128	4.20243	3.26219	2.30381	3.66454	2.41742	4.32817	12.0222	13.2133	17.4861	9.31129	19.6017	12.8363	40.8367	30.6489	47.6801	30.2754	59.8582	48.9527	93.5702	40.9743
PF3D7_0304700	NA	NA	0	0.306854	0.143815	0	0	0.166754	0	1.07131	0.394979	1.76608	2.10115	0.610422	3.34957	1.75027	2.24241	0.442624	2.78998	1.7706	0	0	0	0	0	0	0	0	0	0	0	0.185302	0.377268	0.602682	0.462438	0	0.987401	0.576293	0.736144	0.185948	0.912077	0.394169	1.11811	0.380264
PF3D7_0304800	NA	NA	0	0.0334351	0.0470107	0	0.0436118	0.109018	2.01323	2.45136	4.38981	1.73191	3.37172	2.54409	10.566	5.36377	5.5975	1.37452	14.5919	9.18811	0.0558255	0	0.0381582	0.10242	0	0	0	0	0	0	0.262439	0.363434	0.493291	0.328344	0.302327	0.615811	1.80748	1.45995	3.6095	1.51958	0.828174	3.15676	4.35543	3.56332
PF3D7_0304900	NA	NA	34.4458	31.9708	20.6858	37.6063	55.3564	59.502	39.7504	32.1029	60.09	55.5128	50.1942	59.0967	26.4058	18.7604	37.78	28.1597	19.5901	22.3454	37.7916	76.8555	50.3714	38.1336	32.6036	79.7234	128.69	74.7557	106.311	99.256	39.9736	46.1306	53.2213	61.6815	58.4142	54.1943	75.382	60.5748	26.9801	104.927	65.3146	80.6825	26.8041	54.6958
PF3D7_0305000	elongation factor Ts	EF-Ts	8.97462	6.80545	8.17686	6.85281	10.4908	13.7173	26.6411	25.0558	29.3855	23.6953	28.1909	34.8913	43.9646	38.3768	39.4572	20.8826	33.4913	31.8611	3.51215	5.86055	1.55336	3.79031	6.31464	7.3791	9.38024	8.99624	15.5412	9.84793	15.9281	14.1223	21.9066	22.1153	21.6309	19.2953	15.7671	21.2631	21.15	26.5434	17.8989	16.6892	19.2745	24.6873
PF3D7_0305100	NA	NA	2.04727	1.8968	1.62411	0.904276	1.17363	1.44706	18.7691	19.1664	19.2272	17.0625	14.2598	6.63955	25.9412	23.9792	18.8049	8.07665	27.1703	23.1658	1.19779	0.389574	0.721581	0.577311	1.18098	1.28708	1.4814	1.23979	1.25992	1.36244	5.19184	5.00028	10.7185	8.14345	11.7273	8.01725	8.99103	14.8487	3.0628	8.22282	6.10779	12.2061	10.4005	19.6485
PF3D7_0305200	NA	NA	12.8622	15.8722	15.5144	5.8424	9.1338	9.27124	18.9718	22.6696	31.6292	25.3804	16.5641	6.33179	27.4481	18.3368	17.2547	10.4681	54.318	34.666	23.0293	5.79372	9.25091	7.67006	11.877	10.9461	6.77922	9.29429	5.90783	9.11081	27.3819	23.8341	28.4108	31.841	35.1764	36.2685	23.5159	38.6164	8.17039	15.8933	4.1207	23.6323	13.9175	30.9767
PF3D7_0305300	NA	NA	80.8649	75.4777	69.304	86.3151	66.865	76.3197	34.6835	36.1825	47.1455	52.6115	55.607	69.618	48.0933	34.2787	52.2924	82.0382	41.4747	42.881	121.634	251.205	113.026	123.036	106.86	110.947	56.9395	59.4817	56.3532	65.2239	71.1087	73.0858	47.7353	52.3271	48.1503	59.2191	52.6092	53.9049	7.64067	39.4273	23.191	31.5607	20.4012	50.495
PF3D7_0305400	NA	NA	9.87143	11.5981	11.1821	2.09741	8.64469	7.02309	47.7663	45.12	59.5025	58.2565	55.0761	45.4848	69.4508	67.3361	87.8379	35.1326	81.3489	66.3254	22.1314	21.2345	20.0437	15.2262	14.1835	19.2678	11.2148	20.2731	9.36466	15.6159	10.9243	12.6069	21.3893	20.8269	27.4665	18.3098	35.188	23.3379	60.2188	37.9524	69.2755	35.756	63.9951	42.7077
PF3D7_0305500	NA	NA	17.3141	17.0205	16.6344	12.2209	21.7038	18.2651	26.5908	24.4736	22.059	23.7631	21.4506	19.9447	25.2311	22.5962	25.8829	20.9148	35.9447	28.3803	15.3797	16.9604	13.2212	14.9934	17.8566	15.3649	14.1843	16.2689	16.4891	16.0856	23.978	24.2625	31.5935	28.2122	28.8568	30.6238	26.2844	30.3836	10.9752	26.3591	12.5137	18.3883	14.0484	30.9224
PF3D7_0305600	DNA-(apurinic or apyrimidinic site) endonuclease	APE1	0.81116	0.704572	0.880577	0.619382	0.306341	1.78681	30.2827	26.5119	32.9514	39.5682	57.3091	72.8832	98.1885	72.1715	117.175	32.8609	82.951	79.2772	0.261423	0.436222	0.536066	0.599519	0.128877	0.350149	0.529888	0.694122	0.901333	0.409911	2.21213	1.84373	7.79627	3.84397	10.1462	6.44038	40.356	14.4453	65.9206	57.7816	32.577	34.9956	61.5441	40.4551
PF3D7_0305700	NA	NA	742.305	723.679	788.228	680.435	764.777	660.231	530.279	555.161	442.24	531.59	495.343	465.4	853.11	961.759	865.789	831.589	713.425	847.376	697.077	535.872	752.544	797.488	707.345	624.965	577.539	730.744	723.812	733.757	579.98	610.472	530.352	590.737	505.789	537.14	530.402	465.589	453.507	421.314	644.605	385.27	897.16	464.966
PF3D7_0305800	NA	NA	1.46118	1.73563	1.83026	0.480618	2.3771	0.707397	2.69185	3.10553	3.35112	2.17949	2.3499	1.10054	2.13141	0.835305	1.03774	1.12661	1.00147	1.64306	1.52141	0.967123	1.18848	1.59499	1.1429	1.42321	1.99713	1.73126	1.7258	2.63549	1.63479	2.59407	2.56069	2.47145	1.70017	2.4508	1.08906	3.17814	1.3272	2.91863	1.59066	4.0131	1.3439	5.75353
PF3D7_0305900	NA	NA	0	0	0	0	0	0	2.47969	0.948936	8.39664	4.69301	15.2275	22.3036	15.1314	4.06963	22.2099	2.94047	8.5544	11.4685	0	0	0	0	0	0	0	0	0	0	0.426684	0.492405	3.00755	0.533836	2.86729	1.00121	9.97053	4.21131	1.46712	10.3765	4.03944	9.42684	3.46635	5.72604
PF3D7_0306000	cytochrome b-c1 complex subunit 8, putative	QCR8	2.72444	3.85642	1.47879	2.77376	4.57292	3.42934	154.165	154.835	225.409	214.617	330.627	387.588	408.141	293.957	475.829	163.848	374.418	390.678	4.09751	6.34893	2.40065	2.6848	2.88572	0	5.22055	1.86507	4.03641	4.03852	26.4173	19.0539	40.0861	30.9857	57.5892	24.9674	138.758	96.2942	107.865	160.61	411.961	182.389	305.311	229.393
PF3D7_0306100	NA	NA	7.27239	9.38383	10.274	4.99011	5.91935	5.64287	17.2624	15.7095	29.4049	21.1284	24.9934	32.1321	27.9591	22.2106	26.367	11.1504	30.6635	25.0482	10.9162	9.10762	5.61804	5.0657	3.54545	6.07778	5.20621	4.77388	5.15241	4.51072	16.6631	12.8197	18.2987	16.4666	18.5465	17.7555	11.4347	25.7852	3.04464	11.0466	8.84011	9.78153	6.51623	22.6857
PF3D7_0306200	activator of Hsp90 ATPase	AHA1	13.9647	18.2464	18.2694	15.9673	14.7849	12.8453	58.515	55.4992	69.6591	57.7155	69.9564	66.6141	51.8308	41.0983	47.9363	20.338	37.9946	30.2096	14.3095	22.7222	14.1981	18.2076	13.1985	11.9531	16.0929	9.55984	9.4043	9.98825	37.5409	24.0406	49.9654	43.7105	51.4544	48.5426	62.9838	62.6949	77.1006	77.3988	38.2108	65.2547	44.198	51.39
PF3D7_0306300	glutaredoxin 1	GRX1	1238.7	1221.61	1149.13	1019.15	1315.09	950.018	2034.31	2035.22	1070.07	713.308	856.708	849.433	791.466	2081.71	795.495	1720.69	609.074	751.968	930.407	535.56	650.746	1252.43	888.906	826.927	739.733	807.378	1142.08	864.472	669.985	813.875	1156.72	909.505	790.955	639.137	602.149	734.402	715.823	769.591	797.343	486.081	633.143	1372.54
PF3D7_0306400	NA	NA	1.4372	0.887717	1.35217	1.40469	1.64038	1.32664	37.1195	26.8604	33.8513	32.6293	48.6285	48.5631	130.333	127.853	133.725	42.4165	128.675	112.21	0.988129	0.927473	0.422132	1.01973	0.487131	0.992624	1.10158	0.787096	1.23886	0.619756	3.48393	3.21644	6.41212	3.48708	7.46949	3.27002	17.5676	12.6082	20.0985	10.0864	27.9986	9.97778	50.1371	28.419
PF3D7_0306500	cytochrome c oxidase subunit 6c, putative	COX6C	3.55085	2.09649	2.04074	0	2.73461	1.05166	65.9134	57.1481	61.6523	63.2846	72.5809	85.4159	179.295	191.102	180.634	85.8382	176.97	166.452	1.07706	0.449309	0.920247	3.21103	2.38938	0.961743	0.436628	1.00092	1.85675	2.19548	4.81015	4.3824	14.2758	5.06789	13.6101	7.12863	28.3338	24.9871	47.5868	37.5267	70.6238	22.6838	92.6984	77.5418
PF3D7_0306600	ATP synthase-associated protein, putative	ATPTG17	2.18589	3.93795	1.58197	0.890182	2.20138	3.66859	53.3767	54.0121	61.913	91.8362	104.007	94.8444	161.198	155.227	200.696	65.7297	139.284	134.51	0	0	1.9261	0.861635	4.63058	0.838729	1.52312	0.498799	0	2.35651	7.06509	12.23	19.7123	6.6295	16.9561	6.90759	30.412	34.8657	25.3049	47.0447	75.8038	30.351	79.4323	80.8695
PF3D7_0306700	ER membrane protein complex subunit 5, putative	EMC5	39.6324	37.2158	26.1633	49.7285	38.8346	48.5383	60.3603	53.4162	59.0815	58.4165	47.1054	67.2469	69.0613	68.99	89.0064	49.2089	65.9396	57.2645	42.1158	82.3733	34.9222	53.8338	33.356	43.7716	39.7443	35.1973	62.7572	48.0668	46.0892	44.9477	47.2811	47.1054	57.955	36.5571	71.0541	38.4417	47.6166	66.1529	44.6571	39.0413	48.5923	44.0695
PF3D7_0306800	T-complex protein 1 subunit beta	CCT2	247.011	233.386	239.36	244.577	312.695	302.944	466.016	418.164	319.072	329.506	323.837	352.667	232.46	355.608	253.338	292.087	176.601	210.059	204.672	201.432	205.453	229.934	225.216	209.773	191.822	222.999	257.365	229.131	240.934	212.883	335.509	298.059	311.033	262.206	323.78	289.049	165.132	354.284	358.523	231.307	172.74	374.213
PF3D7_0306900	NA	NA	6424.58	6175.15	6039.74	8249.66	7429.25	9179.18	6577.23	7119.12	9149.31	10364.5	10065.3	10509	8432.31	6521.68	8635.19	7682.56	6773.51	7440.64	7477.09	10284.4	9101.75	8908.82	8208.45	7933.88	8289.05	8810.57	7511.85	7638.97	8226.5	7654.2	8502.55	9147.58	9069.94	9263.15	12740	9125.11	11606.1	12805.6	12471.9	13257.2	11195.2	7891.88
PF3D7_0307100	40S ribosomal protein S12, putative	RPS12	1091.29	914.12	975.338	952.093	1289.68	824.296	1843.87	1285.86	701.252	663.151	736.795	1004.96	607.519	1296.48	731.325	1067.45	381.743	411.006	510.845	882.797	483.324	738.919	625.95	658.828	935.828	712.931	1180.73	812.424	594.227	567.861	1044.3	703.303	794.32	658.06	1304.43	549.012	1654.54	1630.23	741.638	1093.05	714.155	687.371
PF3D7_0307200	NA	NA	1581.61	1497.92	1551.65	1634.37	1743.98	1576.88	2146.7	1713.33	1805.61	1857.33	2076.99	2328.86	1432.97	1525	1599.21	1690.31	1209.49	1246.7	1443.7	2523.97	1731.35	1744.81	1509.88	2126.18	2056.47	1843.89	1998.85	1819.03	1714.46	1654.44	1916.59	1952.39	2025.69	2128	2746.49	2043.87	1529.77	2241.44	1862.58	2231.16	1448.74	1436.6
PF3D7_0307300	microtubule-associated protein RP/EB family, putative	EB1	0.122626	0.189356	0.13312	0.149815	0.123496	0	0.172753	0	0.182803	0	0.176809	0	0.155024	0	0.188696	0	0	0.204866	0.158081	0.131891	0.108053	0	0.155863	0.282312	0.512674	0	0	0.396595	0	0	0	0.929774	0.142683	0.465012	0.182795	0.133359	0	0.34424	0.562834	0.182429	0	0.117329
PF3D7_0307400	ATP-dependent Clp protease proteolytic subunit	ClpP	0.168901	0.652029	0.366709	0.619048	2.38137	1.9134	27.3635	25.4959	28.2	24.5633	38.9648	42.609	51.4592	43.5139	60.0373	17.4938	44.3261	44.4424	0.217735	0.181661	0.892962	0.599196	0.644038	0.583267	0.529602	1.38749	0.955444	0.546254	6.14149	3.77997	10.8223	8.96442	14.1499	5.44415	36.0037	20.2052	38.9492	36.0347	24.678	42.9671	41.8151	27.311
PF3D7_0307500	spindle and kinetochore-associated protein 2, putative	SKA2	0.642688	0.372158	0.523266	0.392593	0.485433	0.404486	34.179	29.4511	23.4729	31.7396	34.5182	36.0912	67.0301	61.0296	57.8542	26.8412	68.9763	54.2223	0.207127	0	0	0	0.408441	0.18495	0.167934	0.329975	0.389527	0.12991	2.92114	2.24739	7.32094	5.11662	8.03892	6.54981	19.4002	20.2693	15.1778	20.0714	17.3302	17.6881	25.7652	31.3611
PF3D7_0307600	NA	NA	0.16777	0.582899	0.819573	0.204968	0.253439	0.316766	25.0531	25.4383	24.0097	22.9756	18.2634	13.2383	47.2971	57.9072	32.2703	15.6951	47.9703	41.4822	0.108139	0	0	0	0	0.193121	0.350705	0.114851	0.338946	0.406948	3.25354	1.64267	8.36101	3.81618	8.39405	5.24866	12.0043	13.0455	8.1572	11.421	10.1388	11.3562	18.1126	19.0219
PF3D7_0307700	NA	NA	4.28723	6.99095	6.47853	3.68741	7.4263	7.20968	104.27	105.488	105.939	115.263	96.9762	63.6485	200.71	204.138	164.981	66.7504	245.307	250.142	1.94543	1.14356	1.1182	1.37899	2.96438	2.92155	4.40929	3.21667	6.59659	5.04709	25.1503	20.2929	52.206	40.7761	60.6994	42.1397	50.6153	70.5338	46.55	56.9506	65.3298	70.9235	107.78	110.59
PF3D7_0307800	NA	NA	16.7397	16.1038	15.2569	9.62414	12.1705	10.4791	40.3551	39.694	33.2282	27.5559	26.2014	19.1799	66.0899	81.4574	46.4211	32.3015	58.5871	54.8857	10.6167	7.4136	9.22877	9.20965	8.98862	11.2318	13.1924	11.4596	15.1192	14.0414	21.2659	18.5313	33.5227	29.3213	31.9767	28.854	25.4871	28.5242	23.0058	22.114	20.8858	22.5062	32.6763	43.4245
PF3D7_0307900	NA	NA	0.487839	0.428606	0.493064	0.205519	0.389649	0.275267	7.8916	8.43419	9.6798	7.80821	4.70546	1.91841	5.6356	5.6118	2.30381	1.40511	5.88635	5.40998	0.520459	0.0904649	0.296456	0.198928	0.256578	0.387279	0.263735	0.264866	0.203914	0.462446	2.12048	1.78826	3.35338	2.44891	3.21005	2.88654	4.01216	8.65325	1.07497	4.13203	1.56994	6.78198	4.96921	11.2184
PF3D7_0308000	NA	NA	0.125575	0.290865	0.408965	0.306836	1.26465	0.790328	41.2195	46.882	44.7407	34.5465	23.3569	15.478	33.1792	43.7582	23.7677	11.1184	45.3652	34.0913	0	0	0.110651	0.148498	0.159611	0	0.393752	0.515792	0.71036	0.101533	9.74105	4.91813	22.7083	13.1394	21.0405	11.9049	20.2166	33.0491	12.5602	23.6187	15.0817	25.2201	22.1685	41.2115
PF3D7_0308100	NA	NA	0.366017	0.339116	0.317872	0.268302	0	0.230358	0.412509	0.34532	0.982142	0.310508	2.32207	1.64434	21.1462	12.3916	20.6139	4.21902	48.6808	34.6408	0.188737	0	0.096755	0.129849	0	0.0842648	0	0.100226	0	0	0.13309	0.102393	0.104234	0.111008	0.0851765	0.138797	0.381926	0.318442	0.305078	0.256873	0.587984	0.272258	7.02786	1.47086
PF3D7_0308200	T-complex protein 1 subunit eta	CCT7	273.857	276.576	265.548	288.218	296.95	315.645	630.526	615.116	608.047	686.286	615.883	713.537	380.683	377.337	337.125	349.129	289.498	335.094	260.738	394.394	296.933	317.123	310.177	303.483	303.335	294.16	308.895	292.544	378.342	371.206	527.247	483.913	540.487	503.955	607.672	542.144	529.065	659.649	731.804	597.305	467.573	564.909
PF3D7_0308300	PhIL1-interacting candidate PIC4	PIC4	4.0786	2.00393	0.603768	0.679488	2.05375	1.40014	1.0447	0.999471	1.10547	0.449358	0.80192	0.640672	4.45305	3.67402	8.27303	5.57471	23.1256	19.8223	1.19496	2.59217	0.163358	1.97309	0.706917	0.640213	1.35639	0.888394	0.749091	0.899379	0.67411	0	0.527952	1.6868	0.64714	1.23029	1.10542	0.403235	0	0	0.850912	1.37901	1.82547	0
PF3D7_0308500	NA	NA	77.3277	105.682	103.725	79.8133	149.038	186.838	1163.88	1373.45	1403.84	1039.48	1036.78	725.408	975.328	1067.14	773.44	495.192	835.856	968.908	93.9564	34.4152	68.5291	85.6624	116.362	99.2436	122.627	111.349	166.999	122.89	436.846	353.7	891.606	727.835	979.905	696.011	688.968	1037.67	1131.02	890.76	1096.04	786.759	1076.48	1579.66
PF3D7_0308600	pre-mRNA-processing factor 19, putative	PRPF19	42.0882	47.6544	43.3928	29.8754	43.3338	31.5203	97.0549	90.3181	59.5878	62.406	56.7863	62.4317	68.0704	98.0486	65.3075	57.7413	51.0418	54.8966	32.13	36.1639	28.2808	30.5856	21.8167	30.3138	24.9443	31.4683	39.1427	37.072	42.7485	36.5063	49.3828	52.7707	54.9911	50.8233	32.4212	58.9411	17.8018	32.508	40.6501	23.0866	28.6097	71.2036
PF3D7_0308700	NA	NA	0.381311	1.6683	0.965866	0.310571	0.640023	0.319979	2.50685	2.39833	2.08426	1.69443	1.09959	1.75698	8.99832	9.02607	12.1263	4.45902	23.8852	26.5433	0.163853	0.41012	1.23197	0.450916	0.161554	0.292619	0.265696	0.0870116	0	0.308306	0	0.177785	0.723926	0.770977	0.739463	0.361493	0.757875	0.691142	0.52971	0.356808	0.777846	0.756357	4.38039	2.43225
PF3D7_0308800	NA	NA	2.29953	4.43859	5.61671	1.40469	3.47374	5.78897	198.421	194.48	268.24	269.627	330.729	403.294	332.131	300.961	344.117	123.888	408.843	377.448	1.48219	2.47326	2.02623	3.39911	0	3.30875	2.40346	2.75484	1.8583	4.64817	29.265	12.8658	54.0255	28.7684	72.9111	34.3352	202.242	145.046	383.335	296.136	363.688	267.69	304.057	239.27
PF3D7_0308900	splicing factor 3B subunit 1, putative	SF3B1	26.384	27.5215	30.5546	14.5163	26.0706	19.7329	56.5812	50.113	40.8806	44.1304	33.2216	21.8577	46.8907	56.4803	40.1823	28.7551	45.8159	43.8899	23.8786	17.1042	21.457	19.3933	19.5239	27.1465	24.8377	25.7628	24.1327	27.8712	31.1027	29.2581	34.1585	32.5421	39.2679	36.4484	21.2812	37.8319	9.97894	19.5311	21.0125	23.5909	27.2948	38.9902
PF3D7_0309000	dual specificity protein phosphatase	YVH1	9.68216	13.2711	11.3374	8.10746	8.98388	9.17466	19.3106	24.0463	25.2992	28.2144	19.2934	26.5671	34.7951	24.2543	29.7976	9.63208	29.784	24.8994	14.445	16.7321	10.8321	10.6777	7.88163	7.88929	4.88932	7.22393	8.87933	6.94885	20.0423	17.9557	21.6864	20.2913	26.8353	20.3174	18.1627	25.3184	16.7751	11.1468	11.5676	14.8895	14.3846	22.7954
PF3D7_0309100	OMD protein, putative	OMD	0	0.810848	1.14008	0.427685	0	0	6.41117	7.54908	12.0027	5.93956	6.05696	2.41952	25.2256	15.6095	9.15755	3.50885	26.0869	18.7149	1.35385	0.376516	0.616926	1.65588	0.44495	0	0.365889	0.479293	0.282897	0.283045	0	0.489654	2.49229	0	2.44395	1.65937	3.131	8.37556	0	3.43951	1.60675	13.5405	6.15532	11.3881
PF3D7_0309200	serine/threonine protein kinase ARK2, putative	ARK2	5.23766	6.41753	7.33396	1.62292	5.04544	2.62756	32.4021	34.9894	28.0634	19.9628	19.7554	7.82596	57.2418	76.6578	41.291	19.3383	64.5596	52.9774	3.37601	0.449037	1.87282	1.03229	2.02612	3.49513	2.9752	3.14385	3.25117	3.37562	7.03835	7.21995	11.6731	9.89941	11.5262	7.37619	14.4836	17.7899	3.90165	13.3182	6.50356	22.0772	28.9899	33.5545
PF3D7_0309300	NA	NA	24.5143	23.8866	21.8447	22.1018	20.9254	18.6461	16.8059	17.1384	13.3865	10.724	11.0574	14.0439	22.6217	26.629	19.7689	21.5712	18.7946	23.5983	23.2368	15.5096	19.175	17.3625	17.3288	16.2973	17.1956	16.6023	17.5328	20.6158	16.8424	15.4943	10.453	11.2318	10.8299	9.94231	5.86244	9.55193	5.09911	6.71609	12.6857	3.51041	8.1598	20.5076
PF3D7_0309500	asparagine synthetase [glutamine-hydrolyzing], putative	AS	455.864	418.48	434.088	523.109	516.315	540.118	556.246	567.689	651.595	718.026	761.835	901.749	971.871	801.966	971.811	601.528	780.199	834.495	425.712	637.453	488.891	482.564	439.552	410.708	482.363	532.172	517.408	537.663	467.88	481.993	419.98	418.816	474.22	435.379	609.523	553.538	623.59	602.573	764.837	614.862	838.092	667.159
PF3D7_0309600	60S acidic ribosomal protein P2	PfP2	6432.01	6501.41	6027.09	8070.18	7405.21	8341.87	7751.18	7754.94	9886.85	12190.3	11721.5	12576.4	8692.17	6826.34	9891.52	7644.47	8324	7479.53	7120.75	8808.64	6239.77	8297.3	7440.91	6890.08	7960.15	6629.63	7012.32	6628.6	8112.51	8170.66	9350.35	9045.67	9211.32	9418.63	13682.2	9338.5	12431.8	12273	10266.9	11178.3	10181	7363.32
PF3D7_0309700	SECIS-binding protein 2, putative	SBP2	7.92279	7.94427	11.1699	2.76556	1.86521	2.5903	36.0935	32.5895	31.1375	22.1964	17.6545	7.34862	20.6824	26.3385	15.8331	9.7977	27.5033	21.3155	14.7234	3.76269	6.98119	6.32715	7.97768	10.4228	3.22631	4.29672	3.40916	5.4076	11.3488	11.8015	16.116	11.2342	17.4795	11.3153	12.4237	24.5059	6.14632	7.22112	4.72263	17.7564	19.8288	26.6795
PF3D7_0309800	YTH domain-containing protein 2	YTH2	43.4844	40.805	44.7848	42.2282	45.5892	54.4544	70.056	65.2199	74.4641	65.1313	60.4474	39.0453	55.5367	56.3459	60.3934	52.1541	42.6279	56.0688	71.5805	78.1894	87.6364	61.1791	51.5856	65.4567	60.3665	48.3924	53.3417	70.4983	44.8671	49.5945	46.3583	45.3134	43.8504	48.8349	44.5434	54.0808	15.4891	36.9341	71.1345	36.4922	29.9565	78.7309
PF3D7_0309900	NA	NA	0.0748651	0.0578024	0.162544	0	0.0753958	0.235588	2.26757	4.18745	5.5802	5.67066	7.71804	8.49459	10.4109	3.77096	12.0385	2.0636	8.00455	7.25427	0.289532	0.161043	0.0989513	0	0.237891	0.0861776	0.0782487	0.0512506	0.0907501	0.0302658	0.589813	0.157075	1.65229	1.24881	1.65509	0.993637	6.19373	2.80891	4.78406	9.45734	5.12564	7.07232	5.34447	8.66733
PF3D7_0310000	NA	NA	0.316475	0	0	0	0.956156	0	32.1007	18.7678	19.8148	19.1771	43.8059	53.9545	43.6095	49.6519	72.5612	16.3894	38.9643	33.8381	0	0	0	0	0	0	0.330779	0.21665	1.023	0	3.45226	0.442667	5.85814	2.39957	6.26004	3.60032	29.7208	8.2602	47.9209	50.6397	29.5355	20.7158	31.3847	25.4354
PF3D7_0310100	calcium-dependent protein kinase 3	CDPK3	0.222601	0.0859335	0	0	0	0	0.627189	0.600038	0.331839	0.94421	0.320958	0	0.98494	0.36762	0.856337	0.557801	0.540918	1.02269	1.43481	0	0.294218	0	0	0.256237	0	0	0.0899441	0.359965	0.539608	0	0.158479	0.506339	0.388514	0.105516	0.497734	0.847294	0.154616	0.312445	0.766275	0.165579	0.782808	0.958428
PF3D7_0310200	NA	NA	30.6082	33.6251	34.8717	6.76233	19.0248	14.9396	57.862	56.5448	53.6337	43.6359	33.3922	10.6743	54.7611	60.8949	40.1924	40.644	59.1095	53.1829	46.6821	11.018	25.6238	22.9254	27.6337	37.8484	20.3203	24.7615	23.0661	27.4422	47.963	48.5136	63.7958	60.9892	64.2278	58.6743	42.4657	61.8276	8.28219	31.1151	15.2304	53.0526	43.462	53.5919
PF3D7_0310300	NA	NA	35.3616	42.0322	43.6967	10.702	25.0585	18.0614	43.5328	47.9498	46.3057	41.0319	30.7623	16.0337	30.9804	32.3945	21.501	19.5715	31.1676	25.2738	35.3324	10.8089	15.4374	13.8541	20.7653	23.4456	23.1982	24.318	27.7947	34.4574	54.9105	53.1451	56.3963	49.9563	52.1508	58.2844	16.6629	56.0486	3.80746	13.6531	10.2365	15.0305	11.7551	42.9352
PF3D7_0310400	parasite-infected erythrocyte surface protein	PIESP1	0.725816	1.08343	1.31322	0.413814	1.36446	0.730885	28.3577	23.0866	18.2497	19.8797	53.5121	60.087	139.166	155.028	168.276	59.6559	132.162	121.178	0.374268	0.260218	0.511643	0.514985	0.553524	0.445595	0.556321	0.894372	1.13399	0.782471	2.16999	2.36887	4.06503	1.76104	4.39156	2.61475	19.1144	5.26229	23.9301	11.6818	22.0611	6.11875	51.1168	23.3338
PF3D7_0310500	ATP-dependent RNA helicase DHX57, putative	DHX57	9.46833	10.6565	10.3086	6.10422	9.95244	7.33153	23.7609	24.9645	23.0445	23.485	18.3087	12.1788	28.9998	29.997	26.251	12.6355	28.0388	24.0503	12.0991	7.80848	7.49171	7.08363	7.33304	7.97568	9.55003	9.65649	9.07925	10.133	15.8591	14.6724	18.3165	16.1162	18.6614	17.272	14.4021	21.975	7.40108	9.37651	7.45417	11.1701	13.7847	21.7898
PF3D7_0310600	eukaryotic translation initiation factor 3 subunit K, putative	EIF3K	61.8655	70.3158	59.0891	69.0947	68.1869	72.8589	66.2077	83.3817	110.828	140.62	136.29	180.762	97.679	58.7584	123.39	45.2433	92.9095	76.9624	65.719	116.23	52.8752	87.288	50.9599	37.8992	32.7471	47.0773	39.4809	43.3658	79.4898	77.2491	99.8098	93.815	95.1552	104.966	180.088	108.284	191.065	144.974	74.7457	118.106	70.4033	101.873
PF3D7_0310700	trafficking protein particle complex subunit 4, putative	TRAPPC4	25.3224	19.5511	18.6369	39.8509	31.1209	54.0238	25.9994	23.1384	42.8674	47.8535	87.8743	114.206	63.4824	43.9457	106.33	32.9816	56.3184	52.7018	26.5577	77.0904	32.1456	33.4975	30.5491	25.1963	19.738	30.5566	22.8914	25.3325	47.8588	42.023	37.2785	44.9081	44.9452	46.3849	90.2092	49.0096	60.8151	98.7968	41.04	60.019	42.5628	59.955
PF3D7_0310800	NA	NA	50.6993	40.9036	45.762	52.893	60.8115	62.3827	48.151	56.0476	50.9523	89.749	82.9574	118.117	102.983	54.5648	147.265	56.1469	71.9814	71.3772	34.5149	77.1995	49.1914	51.8704	47.7876	29.508	47.6321	45.2365	60.7663	68.1675	77.3307	54.9792	58.4011	50.9668	61.643	75.0667	93.4082	53.8978	92.5885	98.3477	98.0483	76.2717	93.3528	64.3153
PF3D7_0310900	NA	NA	0.0796215	0.614747	0.17287	0.389101	0.320743	0.200444	5.72061	4.82908	6.5282	7.33361	7.92138	8.16294	12.7835	9.99346	18.133	4.25639	11.8667	11.0406	0	0.942008	0.0701586	0.0941558	0.101202	0.0916527	0.49932	0.381546	0.257375	0.772529	0.772043	1.44781	2.49419	1.32815	1.94553	1.43418	3.44198	2.51112	1.88035	2.68218	3.28904	4.02734	5.60001	7.23726
PF3D7_0311100	NA	NA	65.6857	61.7436	68.4773	50.0605	65.4163	57.2203	128.082	143.616	153.874	134.319	138.456	100.167	150.262	148.943	121.131	93.185	165.696	122.454	87.3656	58.6494	83.0519	62.6341	69.3092	100.815	84.4559	83.7235	72.2926	84.1326	116.515	107.628	119.361	126.328	127.989	121.677	118.586	140.715	88.7871	100.1	89.0102	166.123	125.103	138.764
PF3D7_0311200	NA	NA	0.778696	1.13171	0.944785	0.839426	0.876476	0.922511	7.42094	6.48232	9.62805	9.60371	9.3784	6.54285	7.35424	3.7067	6.48463	2.44867	6.38162	5.50982	0.94479	1.08386	0.726511	0.975008	1.3973	1.73999	0.813889	0.815289	1.14751	1.07404	3.94184	3.26758	5.60911	5.55689	8.31442	6.12291	7.44261	7.17333	2.1635	4.95058	3.8544	5.04265	2.12629	7.93264
PF3D7_0311300	NA	NA	3.41554	3.60065	3.35131	3.29013	5.42423	3.88586	54.8723	57.1003	60.7084	58.5084	89.9708	97.5295	160.677	127.458	191.432	59.4727	190.894	160.322	1.18544	1.48357	1.21542	1.1651	1.16881	2.5707	2.74609	1.61874	2.81325	2.33675	7.80197	7.07432	23.5686	16.9328	27.8958	13.6993	52.4809	36.7878	58.6714	54.118	75.8213	54.4278	84.7256	67.2451
PF3D7_0311400	kinase-related protein PKRP, putative	PKRP	0.27396	0.4615	0.648883	0.182565	0.025082	0.0313493	0.806983	0.671346	0.408402	0.573485	0.43092	0.258204	0.503767	0.57583	0.229945	0.124818	0.524507	0.603321	0.160532	0.107148	0.043891	0.0294518	0.0316558	0.0286688	0.0520621	0	0.0805064	0.0402743	0.0603734	0.0696725	0.283701	0.113302	0.28979	0.165277	0.222754	0.595877	0	0.559321	0.0571559	0.518718	0.140134	1.02467
PF3D7_0311500	NA	NA	135.258	101.481	105.355	174.584	86.9635	160.635	32.2964	76.2158	121.892	120.395	187.31	209.505	193.213	99.6989	277.512	163.404	138.651	153.838	225.592	605.745	241.733	256.641	208.828	181.206	105.43	113.519	147.593	56.2258	106.515	107.957	94.6644	63.7349	109.367	79.69	282.503	83.9367	330.149	182.342	213.953	339.915	267.12	91.3948
PF3D7_0311600	dolichyl-diphosphooligosaccharide--protein glycosyltransferase subunit OST1, putative	OST1	0.623947	0.619382	0.774106	0.980086	1.88511	1.90735	26.4956	31.4755	34.1494	41.3735	35.7286	47.6425	19.0437	14.4261	19.6139	6.10513	19.6382	18.7632	0.689441	0.671088	0.549792	0.421625	0.453178	0.615625	1.86328	1.03733	1.22455	1.08105	6.91434	5.73515	13.3265	11.0837	16.9054	11.4078	28.7001	24.0403	33.6804	38.1589	27.4108	36.9967	22.0674	29.8496
PF3D7_0311700	plasmepsin VI	PM6	0.144716	0.446934	0.314201	0.176803	0.582968	1.63943	0.815491	1.17028	1.51013	1.05231	2.0866	2.00044	1.28065	1.43397	1.11344	0.967027	2.10995	1.32974	0.186558	0.466949	0.637585	0	0.18394	0.333167	0.756284	0.198137	0.233896	0.585046	0.701614	0.607261	1.64848	1.31671	0.84193	0.960362	0.215723	2.20336	0.201037	1.01563	1.43915	0.215291	0.712482	3.4616
PF3D7_0311800	NA	NA	1.43815	1.82419	1.89577	0.753006	1.44834	0.646514	43.2701	40.5662	48.3908	30.7501	48.1371	53.6043	94.9309	111.289	87.4135	30.203	92.5259	88.5546	0.926979	0.662915	1.08619	0.121476	0.261134	0.591235	0.966307	0.492257	0.498084	0.415287	2.98819	3.8795	6.87463	4.98481	10.7574	4.7719	13.0159	20.2206	17.2671	14.8511	32.8471	14.3652	30.8505	39.9045
PF3D7_0311900	NA	NA	0	0.125827	0.0884584	0	0.164126	0.307704	2.86986	2.6358	2.6724	5.23394	4.81708	4.97486	4.6356	2.42227	4.38859	0.816754	5.28022	3.53947	0	0	0	0	0	0	0	0.111565	0	0.0658843	0.296293	0.455907	1.50834	1.35923	1.89626	2.0085	3.03668	3.01299	1.92436	3.8887	2.05702	3.03059	1.83395	4.59993
PF3D7_0312000	NA	NA	0.457388	2.472	0.496529	1.1176	5.06693	4.0301	109.541	141.17	132.278	111.418	172.785	182.3	157.278	165.425	173.14	81.7579	95.5845	150.917	0	0.983888	0.403028	1.08176	1.16271	3.15901	0	0.939344	2.21775	3.69818	17.7401	17.9135	35.1686	21.5015	44.7046	23.8488	117.953	66.157	216.669	199.66	226.028	147.657	215.535	153.607
PF3D7_0312100	NA	NA	0.524056	0.231209	0.0812719	0.274393	0	0.37694	13.289	12.3101	13.5041	12.1579	16.9473	12.5047	40.5078	36.2259	31.3348	10.8808	40.5079	34.7705	0	0	0	0.354125	0.0951565	0	0.312995	0	0.0605001	0.302658	1.90555	0.837735	2.02539	2.38409	3.65862	2.05825	9.70909	7.24618	10.2961	12.2945	9.90766	15.5925	26.2221	22.9219
PF3D7_0312200	NA	NA	0.15197	0.117334	0.164975	0	0	0	1.49864	0.95584	0.755154	0.675308	1.31471	1.86729	2.36948	1.50584	1.24719	0.846246	1.47714	1.56564	0.130606	0.108967	0.0446361	0.119807	0.0643864	0.291555	0.26473	0.0693561	0.204683	0.491496	0.36839	0.0708553	0.288517	0.53772	0.412593	0.144071	1.05717	0.716173	0.914824	0.995429	0.891268	1.43185	0.926334	0.727021
PF3D7_0312300	26S proteasome regulatory subunit RPN12, putative	RPN12	16.0251	13.8004	10.9285	21.0842	11.7936	23.2745	23.1546	23.5367	35.5274	38.5932	59.5419	89.4589	56.1015	43.0905	88.2039	29.1733	58.5776	51.4852	18.5396	45.2992	14.8446	15.0631	20.1073	20.102	13.5283	15.3303	17.599	15.4487	16.435	15.2306	23.403	21.1854	21.2757	22.2039	65.5388	23.4603	54.5127	67.7672	34.733	44.0125	34.3907	33.6141
PF3D7_0312400	glycogen synthase kinase 3	GSK3	21.3136	23.2578	22.9833	23.4354	45.6483	43.6404	381.532	377.464	406.059	411.737	523.249	532.448	754.451	747.861	759.582	350.835	690.79	722.361	9.15868	8.40544	8.88946	9.07354	12.8228	12.9214	26.4353	17.2171	25.9508	18.4968	70.9553	63.7983	184.72	120.448	198.067	127.432	271.54	225.456	407.808	347.824	473.152	318.769	530.364	497.45
PF3D7_0312500	multidrug-resistant modulator MFR3	MFR3	8.53501	10.9273	8.91356	13.4632	18.9319	18.2228	16.1334	18.6384	19.3267	22.1278	25.0798	31.362	11.6094	7.85058	14.6298	13.3558	5.42565	8.57347	8.07796	18.1273	11.8046	12.1372	12.4962	19.1519	17.164	13.0909	18.7712	14.7627	20.6898	17.2274	23.9982	17.5301	19.2334	21.4064	24.6404	25.2613	11.5565	28.509	22.4797	26.1983	10.5621	20.0539
PF3D7_0312800	NA	NA	2907.13	2870.45	2842.03	3610.17	3427.12	3628.86	3279.45	3038.4	3554.83	4015.93	4299.79	4718	2917.32	2486.9	3120.48	3232.74	2488.25	2317.94	3291.61	4585.61	3868.95	4283.25	3254.82	4398.27	4970.34	4305.55	4809.07	3937.51	3369.9	3378.94	4138.02	4069.52	3952.13	3983.43	6710.68	3892.94	5976.22	6032.07	5281.12	5942.65	4522.42	2870.29
PF3D7_0312900	NA	NA	10.7486	14.1257	19.3647	15.9258	21.6496	19.8626	8.69882	9.24693	11.2504	13.5808	8.24358	2.10752	4.0476	4.15451	2.46338	8.78706	2.96386	3.62965	39.8001	31.2385	26.1968	16.7673	7.26697	26.0618	36.0935	44.6188	59.5095	53.9934	24.1154	27.8299	12.0485	16.2995	17.5625	26.2337	9.20445	19.1507	3.17697	14.4449	6.12305	22.4547	2.09101	12.0348
PF3D7_0313000	NA	NA	13.0019	15.1974	16.075	17.4291	17.6407	18.1844	15.0096	14.3598	25.574	22.7606	34.6297	34.7391	37.6682	21.4724	52.7968	23.8322	45.9292	30.6216	27.4697	44.0893	33.4153	30.5371	19.2803	27.2309	18.4969	18.7905	18.6793	19.4192	16.8534	14.9027	16.1992	10.6798	19.9613	14.8941	32.3025	20.228	16.8077	15.715	19.6159	20.4173	19.8134	21.4248
PF3D7_0313100	ubiquitin-protein ligase, putative	HRD3	23.4983	23.8909	21.7207	17.8125	35.6925	31.3351	127.717	128.669	111.332	112.408	109.582	113.098	145.199	141.651	115.517	59.4659	117.845	120.04	4.39889	4.08716	2.80174	4.40202	12.6172	7.67728	21.9665	18.6346	25.1939	21.3194	55.0824	48.2715	99.1622	84.9091	100.614	82.0499	95.2578	91.3401	108.38	96.5526	78.2499	104.527	115.635	118.871
PF3D7_0313200	NA	NA	3.74901	2.89456	3.19773	0.981483	3.5059	4.38193	15.0901	16.9632	24.3511	25.6384	29.7304	38.559	42.6555	30.5148	53.1566	12.5259	42.9475	27.7375	1.03564	4.32028	2.35961	1.90002	1.70184	0.616502	1.95923	2.56647	3.02966	2.59821	5.84229	4.86934	7.24468	6.09121	13.3982	5.58511	15.9672	11.3578	9.67211	15.4106	12.4958	9.16275	16.3858	26.1342
PF3D7_0313300	NA	NA	2.66647	3.08812	4.34199	5.29374	7.0491	2.09773	19.2519	13.0277	26.3344	27.0643	17.301	19.9654	54.3566	29.1739	32.3122	12.2499	26.9979	26.7285	4.72646	3.22642	4.69914	2.36491	3.81284	6.52246	5.92234	3.42261	3.77096	3.77293	8.07976	3.26349	7.59353	10.1088	4.26608	10.1115	9.93704	17.0367	7.87145	7.01754	13.7685	15.3715	13.8311	14.3509
PF3D7_0313400	NA	NA	15.3263	16.8253	16.8112	12.678	15.3545	14.3683	12.9323	14.9545	25.4653	21.4764	21.1775	15.1721	17.6599	11.469	16.3367	16.2688	19.5266	12.069	22.8447	15.2822	21.4529	17.652	18.4657	24.9931	13.8497	16.3937	14.3207	18.2007	22.8333	17.6413	18.6404	22.515	17.5544	25.881	26.2971	23.1785	8.64946	20.3917	8.18249	33.2508	16.1691	23.6001
PF3D7_0313500	Ras-like G protein	PfG	4.12251	3.92562	4.10236	1.59491	3.18299	1.98917	7.84038	8.89003	6.76012	8.41019	4.35897	4.59055	6.60144	6.46781	5.92075	2.98432	6.1219	5.45243	4.34013	3.17768	2.30062	2.84377	2.61993	2.29363	1.79534	2.21069	3.38701	2.66658	5.7462	2.97927	7.14183	4.68863	6.7155	5.9275	4.60895	9.11611	7.25409	7.233	2.73312	6.74625	4.88079	9.9925
PF3D7_0313600	NA	NA	0.526572	1.3823	0.914616	0.25733	0.742427	2.25356	46.7348	50.1054	54.7916	37.6517	44.6433	27.0532	56.9832	71.309	59.1506	24.4548	76.4328	53.6629	0	0.113271	0.185596	0.124539	0.803153	0.242456	0.660445	0.360477	0	0.170303	5.48881	4.56654	14.6957	8.14482	18.3809	9.58472	24.1762	28.7476	12.7282	24.686	15.0652	17.8608	22.9619	46.8556
PF3D7_0313700	NA	NA	0.482016	0.186079	0.654082	0.294445	0.970866	0.758411	22.918	19.8145	20.4789	23.2206	28.6686	35.1195	49.6632	38.8069	52.8475	15.2995	41.1905	36.741	0	0	0.106182	0.285002	0.153165	0.138713	0	0.65995	0.292145	0.389731	2.92114	2.52831	9.09398	4.38567	7.71175	6.16901	22.0946	11.1394	14.2292	16.5758	19.8192	15.4173	31.9523	25.7115
PF3D7_0313800	NA	NA	1.13587	0.657742	1.13032	0.115643	0.85794	0.476584	20.269	18.2434	18.9083	15.716	15.4222	8.61392	37.694	38.4551	22.5765	6.48324	32.2018	28.7809	0	0.101807	0.0834061	0	0.120311	0.435835	0.296801	0.323993	0.917919	0.306133	4.1302	2.38318	8.08676	4.73679	8.81101	5.83284	10.1592	13.794	3.15586	5.04867	3.76527	3.66125	8.92094	20.7397
PF3D7_0313900	NA	NA	0	0.0441026	0.124019	0	0	0	0.643769	0.30795	0.0851528	0.138453	0	0	0.216638	0.943345	0.175795	0.0954245	0.0925362	0.28629	0	0	0	0	0	0	0	0.0391037	0	0.0461851	0	0.079898	0.162669	0	0.132928	0.21661	0.0851487	0.372725	0.0793519	0.400881	0	0.254934	0.160701	0.218614
PF3D7_0314000	NA	NA	12.0329	12.9716	11.091	12.2045	9.83177	7.43023	91.1555	93.6352	91.7203	83.9208	127.668	127.104	252.577	239.215	244.203	113.025	261.137	259.251	11.9999	11.4769	10.6029	12.8871	11.2543	10.7151	13.7633	10.8796	12.6596	13.217	34.1224	22.5471	37.1766	30.2971	56.2683	34.4378	51.1037	63.4554	39.109	50.0314	100.732	35.1267	84.9506	97.3182
PF3D7_0314100	NA	NA	87.914	81.3564	85.6229	96.3611	74.7229	73.7734	65.4391	51.6816	79.9351	91.0542	102.486	100.194	115.476	83.9206	110.815	120.825	160.096	132.03	166.382	139.152	165.095	160.736	112.931	161.845	95.7974	124.635	94.4749	117.714	123.938	111.631	102.541	131.897	113.175	144.819	68.3134	139.345	26.4179	43.7578	69.875	60.2922	58.105	103.803
PF3D7_0314200	NA	NA	0.0904215	0.139626	0.147239	0.11047	0.0910624	0.455265	5.92334	6.09346	8.15507	8.76669	8.34398	4.73925	13.4315	6.64514	11.6877	2.87003	12.158	9.5925	0.116565	0	0	0	0.0574646	0.0520423	0.378033	0.09285	0.365357	0.402103	1.36995	2.02362	3.86251	1.5083	2.63027	2.7431	4.78498	4.72011	0.31403	2.98254	2.59387	3.09391	2.79823	8.39197
PF3D7_0314300	DER1-like protein	DER1-2	0	0	0	0.168997	0.417922	0.174116	2.14359	3.72871	5.15522	4.52631	6.58176	5.41767	7.86927	4.34043	7.87566	1.61758	8.0672	6.0085	0	0	0.121887	0.163577	0.351638	0	0	0	0.335355	0.223687	1.17362	0.386967	2.16659	2.51716	1.77047	1.18024	4.33018	2.85825	2.69026	4.65977	2.32796	2.46943	1.45934	5.42639
PF3D7_0314400	serine/threonine protein phosphatase 6, putative	PPP6	125.527	115.55	125.702	130.566	124.17	105.166	78.2779	61.7699	57.4382	76.433	69.5897	89.2352	46.146	63.9664	42.7509	83.338	43.3645	51.4963	83.9166	110.364	100.244	85.6114	93.0492	84.7361	101.527	108.283	116.354	123.465	102.495	106.936	63.2364	75.9568	66.7762	76.5155	55.6217	72.9985	15.7759	38.1415	56.6219	37.7107	41.3622	71.0146
PF3D7_0314500	NA	NA	41.357	59.4113	52.787	15.3111	30.7959	29.0259	24.0113	19.5936	41.4752	32.503	21.6839	11.2605	28.2014	14.4879	17.3562	25.1234	27.6113	24.9154	58.4844	19.1406	24.2945	27.8618	26.761	26.2556	18.3384	20.0757	20.458	28.1697	79.5953	63.8078	57.4602	57.0137	58.3289	65.5834	21.6707	59.4239	2.08918	18.2943	5.56043	27.2205	11.9876	36.9323
PF3D7_0314600	NA	NA	10.1614	12.5154	9.98043	6.79838	9.50249	14.9222	9.54345	14.6737	21.2793	14.3673	26.8607	18.9514	19.2691	10.788	16.7531	6.87093	27.8277	15.1573	6.86158	12.4904	6.18236	6.00816	8.30286	11.9754	6.5747	7.61872	7.03856	7.82471	20.8202	17.2589	22.0476	17.9773	19.9872	22.2483	17.3112	24.2065	8.73851	22.7524	8.14335	18.7162	7.99764	22.4542
PF3D7_0314700	RING finger protein RNF1	RNF1	0.901231	0.941416	1.03591	0.453375	1.22796	0.400379	4.40638	4.14417	3.63535	3.27666	2.14026	3.35874	4.22224	6.91651	3.34464	3.45393	2.8341	2.78987	0.47839	0.171057	0.140139	0.125382	0.943353	0.732291	0.110819	0.0362916	0.385573	0.214319	0.385532	1.03813	0.754856	0.562741	1.23369	0.351808	0.71123	2.01788	1.69385	2.00908	2.35213	2.83922	2.12531	4.61582
PF3D7_0314800	NA	NA	0.0601941	0	0	0.0735405	0.0606208	0	0.0848001	0	0.179467	0.510654	1.82261	0.762735	7.15315	3.47932	4.72392	1.20669	9.45887	7.69311	0	0.129484	0.159121	0	0.0765091	0	0	0.0412072	0.0972883	0	0	0	0	0	0	0.0570656	0.0897293	0.130925	0	0.0844892	0.0460468	0.0895494	1.69345	0.460749
PF3D7_0314900	NA	NA	0.204778	0	0.111151	0	0	0.257761	3.3176	5.10596	5.18959	6.82481	9.74359	9.55356	22.3931	12.5129	25.2088	5.13141	27.7002	19.1583	0	0.110125	0	0	0	0	0	0	0	0	0.620505	0.143216	0.728954	1.3974	0.238272	0.485337	8.2419	1.67026	2.7025	3.73657	4.22954	3.65572	8.92964	5.77997
PF3D7_0315000	NA	NA	0.3298	0	0.358024	0	0	0.41513	6.50461	8.89003	8.35797	9.9923	13.3147	14.4365	19.5959	14.1611	21.8222	3.30571	22.9738	24.5187	0	0	0	0.390003	0	0	0	0.225772	0	0.799974	0.799471	0	4.2264	0.50012	4.60491	1.25064	11.7989	12.5533	36.6522	19.9052	13.6236	16.191	19.9484	9.78213
PF3D7_0315100	eukaryotic translation initiation factor 4E	eIF4E	133.294	117.769	105.02	150.089	150.569	146.679	158.744	154.835	162.243	174.199	194.172	236.176	200.823	164.305	190.733	166.663	156.721	141.189	119.398	214.604	182.354	158.926	168.724	153.436	128.403	148.822	133.481	140.44	128.915	133.779	143.619	142.118	152.538	149.295	243.353	136.293	199.296	237.628	215.917	190.122	228.672	176.972
PF3D7_0315200	circumsporozoite- and TRAP-related protein	CTRP	0.444412	0.846374	0.643258	0.434358	0.2387	0.298344	0.125215	0.159726	0.1325	0.287249	0.0427185	0.0341288	0.14982	0.293574	0.136771	0.890899	0.0959927	0.272235	1.26039	1.62516	1.69691	1.50654	1.35568	1.02313	0.650297	0.425925	0.478851	0.550967	0.574561	0.497294	0.295304	0.22464	0.10342	0.168526	0.220823	0.0966619	0.20579	0.0415855	0.0453283	0.0881522	0.0416758	0.11339
PF3D7_0315300	NA	NA	0.0354424	0.136823	0.0384754	0	0	0	0.599164	0.859839	0.686857	0.558393	0.459925	0.57158	0.94093	0.292661	0.545382	0.118417	0.80383	0.828966	0	0	0.0624602	0	0.0900973	0	0	0	0	0.0859701	0.085916	0.148724	0.25233	0.376222	0.57735	0.201602	0.316996	1.34906	0.246179	0.348231	0.10845	0.685448	0.623192	1.45818
PF3D7_0315400	NA	NA	2.92586	1.31776	5.02905	1.78729	6.62984	11.3555	18.8919	28.2613	47.9784	44.6193	79.4514	92.6856	96.4787	45.0985	123.812	19.5513	106.647	65.1745	0.628635	0.262243	0	0	0.309907	0.561328	0.764523	2.00296	1.5763	1.37998	12.412	10.9134	15.2757	12.2014	13.9013	18.0296	59.9702	25.4556	102.63	49.6234	30.7752	36.6355	51.6175	46.4243
PF3D7_0315500	NA	NA	0.806808	0	0.291951	0.328565	1.35421	0.338518	14.776	21.0232	31.6721	32.9188	34.899	37.1755	37.3987	38.1962	36.8313	10.3333	40.5178	30.3277	0	0	0.236974	0.318028	0	0	0.281091	0	0.434666	0.217446	3.91158	1.50469	3.82935	8.15647	7.19723	4.33429	20.8465	10.5291	32.5033	21.139	20.7786	24.0054	20.8066	22.1293
PF3D7_0315600	NA	NA	0.257869	0.398194	0.139968	0.157522	0.259697	0.324587	5.44919	3.99686	6.53504	4.21897	6.50666	5.0498	8.31293	6.60089	8.92811	3.44628	8.98154	11.0933	0	0.277351	0.227222	0.609882	0.491642	0.148417	0.269523	0.794384	0.729362	1.04249	0.468826	0.901729	0.183588	0.19552	1.80027	0.733399	1.92198	3.36527	1.79113	3.07655	2.26852	3.26082	5.9851	6.78503
PF3D7_0315700	NA	NA	0	0.258167	0.217795	0	0.336746	0	0.659486	0.630936	0.498466	0.162095	0.289273	0.693321	0.676349	0.883543	0.30872	0.111719	0.325013	0.111725	0.344843	0.0719278	0	0	0	0	0	0	0.0540433	0.270358	0	0	0.095223	0.507059	0.155627	0	0.299066	0.436371	0	0.469334	0.153473	0	0.329247	0.319931
PF3D7_0315800	NA	NA	23.9691	20.2247	21.3738	21.3352	24.139	19.3954	45.8268	38.3049	39.8152	57.0599	46.9028	35.6968	46.1019	38.4534	32.9316	22.023	33.2827	26.7437	18.0982	31.1202	19.3101	20.651	20.6731	17.3429	18.4314	22.5032	21.9987	23.6714	23.0339	23.4686	37.0547	25.4433	36.854	29.2157	37.5164	28.3013	9.51355	27.6356	27.1106	16.8103	24.6852	41.9357
PF3D7_0316000	microneme associated antigen	MA	2.23793	1.72788	1.32515	0.497115	1.63912	3.8413	3.72597	5.20991	7.58219	10.1091	15.2538	14.0615	13.3744	7.05579	14.4009	4.75821	17.468	15.1252	1.8359	1.75055	1.97196	0.481173	0.517182	2.10772	1.06322	0.27855	2.13734	0.986981	1.97272	1.70743	2.02782	2.15961	3.78759	2.70024	8.79492	3.9826	9.32668	4.569	12.1393	10.2906	8.29929	2.72523
PF3D7_0316100	NA	NA	0.628717	0.485424	0.455014	0.512078	3.58798	1.05518	15.0573	15.5353	17.1829	13.2072	22.9651	29.6938	19.0757	18.6896	24.509	5.60164	23.4259	21.1824	1.08066	0	0.73866	1.23914	0.532749	0.723719	0.876176	0.430402	0.16936	1.18614	3.04815	2.3451	5.07293	4.76703	8.29089	2.78152	18.1193	11.3958	25.6198	13.5313	18.1158	16.8359	20.0462	15.6404
PF3D7_0316200	NA	NA	0.206806	0.439098	0.533196	0.126329	0.754984	0.227774	16.1695	18.8491	23.8156	15.5705	20.6865	9.76726	44.8375	35.5196	29.6749	9.37117	53.5201	42.1079	0.166625	0.0834113	0.13667	0	0	0.148784	0.216152	0.26545	0.376029	0.14631	2.66325	1.69945	6.92001	4.27289	7.97089	3.40649	6.74358	13.2414	2.2265	9.39764	5.04264	12.5756	14.7271	21.568
PF3D7_0316300	inorganic pyrophosphatase, putative	PPase	9.57338	9.40733	8.66053	5.848	13.5854	11.1374	274.026	325.505	356.568	288.472	341.948	302.765	655.927	617.077	591.487	200.638	680.038	641.69	1.12194	2.02813	1.15031	1.2007	0.737463	2.50454	3.48696	2.28385	8.32254	3.63568	40.4362	32.6651	90.6697	74.7865	115.611	65.3183	110.057	198.288	87.855	136.205	194.069	122.137	254.537	366.114
PF3D7_0316400	NA	NA	0.869444	1.15078	0.674178	1.36571	3.43989	1.79794	29.134	32.3927	33.1434	37.5568	46.115	53.5109	32.582	32.5121	38.6077	9.23348	31.993	28.6877	0.080059	0.267181	0.164167	0.220319	0.473613	0.714873	0.90874	0.850282	1.70635	1.05448	4.36579	5.29884	10.9651	9.41753	13.585	8.36031	35.5488	23.3009	46.846	58.3159	33.35	58.0206	40.8399	39.0391
PF3D7_0316500	kinetochore protein NUF2, putative	NUF2	0.406897	0.523599	0.294479	0.497115	1.36594	1.02435	44.9027	53.0131	75.0131	70.024	71.1845	60.9332	87.6192	68.318	72.8395	24.924	115.575	85.9926	0.174848	0.14588	0.239025	0.160391	0.689576	0.780635	0.567049	0.64995	0.657643	1.20631	12.9871	11.1932	24.1407	14.3974	25.724	15.6871	36.9993	48.3812	33.9152	31.6022	32.3715	56.4976	45.2168	81.1079
PF3D7_0316600	formate-nitrite transporter	FNT	868.375	857.897	962.218	793.956	1085.02	956.165	670.904	673.463	584.883	708.216	606.8	690.39	760.742	737.748	698.915	661.514	560.282	615.625	407.025	415.683	358.362	401.817	675.449	424.873	629.166	753.322	782.611	746.9	961.132	933.311	792.078	855.512	805.785	830.141	753.292	719.716	523.137	654.259	572.743	563.837	700.889	641.518
PF3D7_0316700	protein YOP1, putative	YOP1	21.1696	22.011	24.8198	29.6567	73.3397	70.3477	79.5287	89.0205	96.7788	83.4672	146.92	181.432	303.31	255.915	368.321	127.314	255.61	294.962	10.5523	10.9291	17.1614	18.0245	20.4496	24.3685	88.8006	86.5664	119.525	81.703	53.028	61.1957	61.4922	70.1971	62.4014	56.7294	94.2497	58.6307	112.536	103.008	139.054	72.6452	232.272	112.348
PF3D7_0316800	NA	NA	4198.36	4218.34	3860.26	4191.28	4944.93	4642.17	4755.5	4847.48	4088.76	4310.69	4489.2	4750.27	3961.47	4619.69	3881.97	4180.83	3532.01	3458.25	3888.52	4510.93	3633.22	4429.07	3975.61	3603.23	4656.08	4612.22	5197.6	4240.78	4732.66	4668.76	5480.8	5261.08	5038.1	5110.67	5204.47	4834.25	5061.47	4996.55	4261.8	4383.52	3997.78	4185.86
PF3D7_0316900	NA	NA	12.9286	16.0195	15.0537	12.3559	16.3803	14.3051	19.3886	16.863	25.8011	20.9755	20.4452	24.5012	29.3935	21.1791	26.9537	14.4567	35.6391	31.7021	16.2634	29.6051	11.5758	11.8364	13.1197	8.16121	7.73725	8.49369	10.9534	10.7063	20.9778	17.7921	18.4089	17.3919	21.473	21.4492	20.8264	18.8225	12.4563	14.3418	9.96979	15.511	12.2463	19.5527
PF3D7_0317000	NA	NA	72.0738	80.3156	74.7463	81.0945	98.0267	93.2156	195.744	182.931	162.457	205.912	261.764	382.881	365.402	326.407	439.432	165.503	291.296	271.647	63.8574	124.936	61.5438	69.7073	56.0355	39.0589	52.0329	71.0424	78.86	71.692	90.059	74.1371	114.968	92.7694	99.7124	85.4685	194.2	122.826	272.501	229.791	209.928	136.7	310.595	179.391
PF3D7_0317100	6-cysteine protein	B9	0.775201	1.09729	1.89347	1.10493	3.51313	5.44805	2.09316	2.96029	2.88905	4.69741	2.42174	3.94399	2.36835	1.81365	2.88277	1.83461	2.6163	2.64415	2.49834	5.28054	3.18766	3.36126	2.70961	3.34627	3.64607	5.88171	5.16826	5.43213	1.40938	2.53005	1.93165	1.56739	1.95432	2.63343	4.04448	2.73992	2.06405	7.97926	3.06387	6.05456	1.86284	4.14122
PF3D7_0317200	cdc2-related protein kinase 4	CRK4	2.41939	4.63881	4.28984	0.394109	1.90862	0.964363	95.1504	97.6073	80.0078	58.9842	53.4888	24.0608	223.532	274.295	134.708	51.1278	279.518	255.553	1.1436	0.130109	0.213185	0.476838	0.307513	0.556994	0.37931	0.772914	0.749476	0.586853	7.91754	5.13254	25.2629	13.3301	26.3681	11.774	17.9724	38.5024	7.00201	13.9231	22.6101	15.8368	49.9994	84.5697
PF3D7_0317300	NA	NA	22.2778	31.1659	29.1734	4.62265	9.68435	6.5516	36.3248	34.8269	28.7804	17.8054	15.8611	6.46346	50.2604	58.6161	29.9637	23.6495	74.6018	59.1888	27.9814	4.88351	10.6201	9.25439	14.2166	15.5947	10.3402	12.4963	10.8138	15.8338	33.3553	34.1298	36.5043	34.2306	32.0852	34.5933	8.74928	35.3881	1.35894	5.25906	4.16517	7.38629	12.7089	33.5183
PF3D7_0317400	NA	NA	1.56957	2.33047	0.393205	3.09763	2.43184	2.58357	9.01479	6.99726	12.239	14.3396	16.8862	19.7493	21.2162	11.5648	26.3818	8.26957	14.865	17.7503	0.778223	0.909007	0.744709	0.428327	0.767302	1.11184	4.79533	3.30611	5.7566	3.12385	4.68284	3.37757	6.8766	8.05589	7.44564	6.40982	16.3779	7.22171	6.70898	11.5237	23.5517	13.6509	12.313	12.2451
PF3D7_0317500	kinesin-5	EG5	2.01138	2.32944	3.23327	0.708849	6.31063	4.13849	16.0206	16.5261	16.203	12.8444	9.31382	7.17369	18.2884	20.5692	13.2136	8.0126	19.4878	19.0956	1.84497	1.28968	1.227	1.60094	1.3766	2.31531	5.21528	4.10432	6.75181	5.81709	8.57951	5.51858	11.4559	10.8514	11.9268	9.93755	7.20742	13.0404	5.3734	9.17537	4.20169	8.97683	6.66523	13.1383
PF3D7_0317600	40S ribosomal protein S11, putative	RPS11	4600.64	4343.8	4208.28	5679.29	5394.03	6114.74	4688.48	4859.83	5733.92	6526.28	6600.54	6746.83	4571.62	3814.89	5009.26	5212.06	3769.74	4037.54	4935.53	7163.57	6777.45	6541.89	6039.82	6176.97	6476.24	7080.08	6116.32	5949.39	6052.07	5690.63	6462.68	6763.05	6732.12	6952.62	8015.23	6426.4	6154.15	7310.43	7662.46	7069.26	6595.58	4778.63
PF3D7_0317700	NA	NA	17.177	17.357	18.5521	10.4527	11.276	9.01111	23.5528	21.5036	23.0034	20.6584	19.5112	14.2806	39.8708	38.4239	32.0404	21.1476	36.9135	34.6038	19.6392	13.5215	17.4241	16.3119	15.8959	15.8783	9.14774	12.7749	9.22465	13.2707	13.7826	14.1653	10.4732	10.4919	12.5201	10.5734	15.6168	18.0158	8.73219	18.4117	12.7058	21.1379	22.9648	29.3614
PF3D7_0317800	NA	NA	47.6897	48.3806	47.858	18.6308	32.3908	21.9872	108.588	102.393	78.5327	86.3582	66.363	55.5741	114.62	139.659	99.8368	61.1409	83.0963	87.7793	49.3256	28.9268	30.0506	28.5255	30.3078	32.8737	15.9388	24.8649	21.062	33.6272	34.9503	49.6414	52.9027	45.8296	47.4245	38.114	54.9703	73.2727	62.398	59.5436	57.4793	73.8343	62.793	92.3201
PF3D7_0317900	NA	NA	3.90503	6.03004	5.12649	3.88326	3.65833	6.05849	20.9818	19.4614	19.3594	16.0688	19.1175	17.5749	20.321	22.1968	18.8655	12.592	20.7438	17.5995	4.09751	6.73964	6.40172	5.26222	5.42516	4.91325	3.60692	3.79232	4.91708	5.21336	7.04462	6.35131	8.79308	9.50229	12.6802	9.5565	9.74694	12.0491	10.345	13.3842	13.0605	7.83597	10.1557	19.3768
PF3D7_0318000	NA	NA	0	0.238328	0	0	0.621737	1.55418	0	0	0	0.748192	0	0	0.390233	0	0.474993	1.03134	0	0.773546	0.795858	0.996005	0	0.730055	0.392345	0.355324	0	0.633942	0.498902	0	0.748273	0	1.31858	0.468093	0	0.292637	0.920277	0	0	1.73307	0	0	0.217104	0.590689
PF3D7_0318100	stomatin-like protein, putative	STOML	18.7151	13.1595	16.6887	11.4323	19.6892	14.0923	56.968	54.2766	44.5889	24.9088	26.9844	34.2626	30.2082	60.9871	25.1987	20.657	23.0094	27.7768	1.93871	3.59447	2.79755	2.56882	6.37168	6.53985	10.3044	10.8672	21.3357	17.9692	23.4938	24.7752	36.8792	35.4752	38.6915	27.8809	17.1871	31.4383	12.9993	18.0597	17.64	14.1696	14.6907	29.5778
PF3D7_0318200	DNA-directed RNA polymerase II subunit RPB1	RPB1	101.896	95.2259	95.7823	80.8537	110.526	102.588	184.958	165.509	152.014	159.329	126.776	111.005	163.333	167.563	142.674	113.539	138.64	156.987	98.9862	91.8817	88.1685	84.6821	91.473	92.0561	102.611	108.359	108.22	118.273	119.765	118.706	139.462	133.566	144.013	137.493	92.2681	144.001	46.8535	80.6536	102.051	81.1607	86.4229	127.374
PF3D7_0318300	NA	NA	11.4135	13.3911	12.5724	10.5948	8.39539	7.46493	12.7686	13.7994	17.1812	15.2561	21.3774	24.0393	34.5869	27.7192	30.3046	18.3191	33.2634	34.6307	16.0117	12.3359	13.4586	10.1227	10.8802	15.4566	13.5082	10.8008	11.5293	14.7924	14.444	14.4776	7.96642	12.1324	11.4575	11.0854	10.5084	13.2643	4.5079	5.41855	10.9993	8.8227	14.6382	14.1322
PF3D7_0318400	NA	NA	0.529241	0.326896	0.919251	0.646585	2.02537	1.19911	1.04381	0.998627	1.73571	0.641398	1.37356	0.609649	1.87338	1.57325	0.977266	0.707302	0	1.59152	0.955164	0.22769	0.279805	0.25034	0.672686	0.731054	1.99138	0.652146	2.13845	1.88282	1.66782	1.6286	0.602864	1.12358	0.985285	0.802774	1.42006	1.61158	0.882254	0.297139	0.242912	0.472404	0.446677	1.01275
PF3D7_0318500	NA	NA	0.251554	0.233066	0.314043	0.0153664	0.0633343	0.0158319	0.42526	0.237329	0.35625	0.274377	0.344569	0.0869319	2.75082	2.63801	3.44508	0.903507	9.25061	7.6172	0.194571	0.013528	0.166243	0.0594947	0.0479602	0.0868696	0.0131462	0.025831	0.0203286	0.0610177	0.0762242	0.0527788	0.0537278	0.076293	0.0585396	0.023848	0.281237	0.355643	0.0698908	0.229505	0.18281	0.411654	2.62734	0.565613
PF3D7_0318600	NA	NA	9.78711	10.8833	9.95644	5.94096	7.62482	5.50109	14.655	17.0902	13.6724	15.8149	8.60895	8.36692	6.38096	8.43738	3.40987	7.71223	8.87484	7.19849	12.1407	9.07004	6.45439	7.64299	5.55488	8.21921	5.59724	6.69998	6.31738	6.71884	13.9515	14.895	20.6845	17.2684	17.6906	14.8805	8.16633	16.8693	4.361	10.0222	3.53154	10.3477	5.15185	13.0747
PF3D7_0318700	NA	NA	1.04437	1.61269	0	3.18982	0.525886	0	0	0	0.778438	0.632846	0	2.40608	5.9413	0.862375	16.8741	4.3617	19.4565	20.0649	1.34633	4.49309	0.920247	2.47002	1.99115	0.601089	0.545785	0.357473	0	0	0	1.4608	0.743533	0	0	0.495044	0.778401	1.13578	0	0	0	0	3.67268	0.99925
PF3D7_0318900	NA	NA	38.6487	49.8068	51.5197	22.3938	28.4765	28.4378	86.2751	90.2006	95.1071	77.8357	60.8477	45.3391	121.431	108.647	88.7709	51.9843	131.897	105.399	42.4963	27.0502	27.2944	35.9581	35.5788	35.6564	23.465	31.516	29.2808	36.4191	74.9164	67.5745	105.207	96.3157	98.0415	90.7917	65.0256	98.434	30.3981	64.4193	31.9565	76.5215	66.0582	87.4173
PF3D7_0319000	P4-type ATPase ATP7, putative	ATPase7	0.705579	0.700416	1.20365	1.19041	1.01511	1.6071	7.14735	6.6568	8.81534	10.2205	15.3086	17.6876	33.301	23.3049	38.4143	10.2716	38.8631	34.2407	0.649702	0.686612	0.680934	0.397322	0.298939	0.966899	0.877938	0.897036	1.11323	0.923652	1.87329	2.63179	3.2532	2.70038	4.10491	3.31268	4.90831	4.20207	2.89385	4.33871	7.83919	2.34927	9.99598	11.2516
PF3D7_0319100	E3 ubiquitin-protein ligase RBX1, putative	RBX1	59.1809	80.6343	70.544	60.961	95.2437	88.3689	300.795	380.831	311.375	265.092	259.337	273.358	455.5	521.258	378.552	275.271	414.508	418.262	57.5928	49.2992	64.9286	74.7867	64.8967	70.7949	69.1327	85.7934	97.0572	87.2564	133.615	112.806	218.103	180.367	211.982	151.813	220.547	262.491	329.658	290.734	376.82	288.294	428.479	401.365
PF3D7_0319200	CCR4 domain-containing protein 4, putative	CCR4-4	12.7811	15.0423	14.5499	6.07718	11.2715	10.4355	25.6947	28.6794	32.2361	36.1706	27.9914	24.671	28.9095	25.3293	33.1689	16.9659	32.6809	25.9697	20.1281	15.6788	16.3757	14.9508	12.7328	17.6549	9.82051	14.9926	11.3337	15.2498	24.9537	21.3564	25.9704	27.1344	26.1258	32.3552	25.7465	36.966	13.7244	29.1884	13.371	38.1312	22.7892	32.1919
PF3D7_0319300	NA	NA	35.8069	33.9566	32.111	29.0056	47.8197	47.0309	58.1202	61.8989	55.1192	66.9795	57.8013	85.1842	64.9484	68.7757	62.286	50.7149	40.9832	46.4913	27.5955	33.0703	27.093	29.9164	26.7136	28.2251	33.7641	40.2323	36.1704	38.7068	44.3433	45.7294	60.4063	54.2988	62.4952	42.8013	16.8251	44.8667	28.6559	52.4442	52.9962	28.3716	30.9326	62.5617
PF3D7_0319400	NA	NA	0.18376	0.177348	0.249357	0	0.138797	0.115652	17.5389	21.2996	18.4223	15.5892	20.9314	14.2883	76.4296	79.8898	49.8377	18.8794	77.7715	60.4788	0.23689	0.197643	0.16192	0.054326	0.233566	0	0	0.0314492	0.22275	0.111433	0.946588	0.642581	2.15864	0.975308	3.20723	1.43722	8.49165	6.99452	7.14772	7.35093	8.39912	6.56101	26.1719	31.6478
PF3D7_0319500	NA	NA	223.966	258.602	265.076	175.337	203.569	187.264	262.553	284.151	273.006	232.724	238.115	204.672	274.961	334.49	254.123	234.35	304.209	260.197	255.368	184.579	179.715	183.1	177.277	208.714	202.187	218.635	220.849	226.358	244.264	281.039	244.646	216.1	211.913	241.07	177.174	286.216	167.92	162.004	220.5	190.05	211.688	325.304
PF3D7_0319600	elongation factor 1-delta, putative	EF-1delta	1695.87	1463.74	1462.31	1367.27	1525	1206.73	1378.69	1258.22	907.351	1024.97	1068.08	1359.05	979.873	1239.18	977.747	1243.5	744.208	704.801	968.326	1239.75	1047.68	1320.12	1015.11	932.645	1118.41	1230.62	1480.13	1232.74	835.931	939.007	844.502	767.446	759.762	747.674	1208.95	811.683	2003.24	1680.07	1271.95	1191.09	1424.9	996.704
PF3D7_0319700	ABC transporter I family member 1, putative	ABCI3	13.4362	13.3687	14.8247	9.38014	11.3164	9.7398	15.4076	14.6328	12.3994	15.1204	9.08109	8.89037	3.46291	2.41047	2.46136	8.81803	5.37685	4.00842	14.9754	15.29	10.0423	13.619	13.1642	10.7713	8.23379	10.9363	10.2117	11.1224	26.1002	23.1286	30.975	29.2891	31.7096	31.3517	16.035	26.9412	5.24961	13.555	3.96142	10.6785	3.55783	15.0366
PF3D7_0319800	NA	NA	0.131092	0	0.142311	0.320316	0.132021	0	0	0.176685	0.195424	0.317747	0.378032	1.05706	0	0.649487	1.21034	0.437995	1.48658	1.42356	0	0	0	0	0	0.301802	0.137017	0.0897421	0.741569	0	0	0	0.186661	0.198793	0.305067	0	0	0	0	0.920013	0.100282	0.390046	0.0922011	0
PF3D7_0319900	NA	NA	7.75816	5.52921	7.12638	5.10371	7.81316	3.25515	3.64317	1.07245	2.96548	2.16976	5.16284	5.49961	6.03561	7.22752	11.0198	10.9665	8.37879	5.48358	5.89819	9.62805	7.88783	6.11624	6.32111	5.72466	8.52464	4.7663	3.85817	5.30776	3.85777	4.73021	2.54926	1.20664	2.77757	2.82882	3.26187	1.08169	3.31615	3.3506	3.04347	5.32691	7.69513	2.66467
PF3D7_0320000	protein phosphatase inhibitor 2	I2	12.1003	11.3444	10.7901	13.1992	42.2159	34.2697	287.356	295.302	322.112	354.568	484.149	521.705	581.838	496.728	694.915	279.389	592.972	488.778	3.3426	4.64802	1.90396	2.04415	10.4364	6.96434	17.164	20.4129	23.3985	15.0248	52.3791	43.5218	123.683	111.406	149.845	110.617	410.352	213.839	672.979	402.159	564.307	426.245	836.762	404.386
PF3D7_0320100	protein transport protein SEC22	SEC22	34.4359	40.3171	38.9149	42.416	38.0912	44.0562	59.6465	56.684	72.3737	77.6519	138.78	155.095	184.127	139.378	235.847	96.1931	181.533	128.029	42.573	63.4497	32.333	44.7274	30.8538	38.9896	38.0574	30.3369	38.3211	34.9178	39.6855	46.5877	36.9757	38.0948	42.6957	46.0257	37.0267	57.7098	18.4293	47.5423	92.1988	24.7749	59.1599	79.3998
PF3D7_0320200	NA	NA	0.107298	0.165687	0	0.262177	0.216117	0.405178	1.05811	0.867692	0.959718	2.34066	0.773541	1.3596	1.62775	1.4176	1.15576	0.537743	1.21676	0.985919	0.414963	0	0	0.126885	0	0	0.112148	0.293813	0.17342	0.260265	0.260102	0.750412	0.763903	0.976262	1.12363	0.406885	1.43951	1.40027	4.02453	4.21694	1.14912	3.35212	1.50932	4.00384
PF3D7_0320300	T-complex protein 1 subunit epsilon	CCT5	299.048	306.531	291.135	287.369	368.512	310.201	782.304	694.866	584.003	641.252	540.412	613.955	384.707	510.281	375.62	392.748	280.106	317.087	262.232	347.67	244.964	291.702	253.203	239	243.526	262.662	309.972	266.18	344.183	323.284	514.369	453.131	510.786	416.613	596.523	472.449	592.94	638.481	550.623	504.715	449.437	534.897
PF3D7_0320400	oocyst capsule protein Cap380	Cap380	0.142137	0	0.176344	0.124037	0.0613476	0.102236	0.171634	0.164203	0.363238	0.295301	0.380604	0.257293	0.12835	0.0670674	0.218718	0.0678423	0.0328944	0.152654	0.183233	0.283912	0.250489	0.120059	0.103235	0.280482	0.191007	0.0834026	0.0656365	0.0656708	0.0984443	0.0568037	0.144562	0.0615832	0.212638	0.173249	0.18161	0.220825	0.451324	0.513013	0.248527	0.453116	0.171376	0.485701
PF3D7_0320500	nicotinamidase, putative	Nico	9.32645	10.5762	9.4918	14.4209	25.9763	20.5441	9.85416	9.23116	14.555	18.014	22.6925	35.084	30.5816	11.0705	43.2785	12.4156	35.6473	31.7712	0.939297	0.940414	1.02725	1.8956	9.44638	4.86463	11.5757	9.27766	6.94808	6.59823	32.6761	19.1603	62.8717	51.0472	55.2768	64.1024	53.2209	40.7295	29.3537	46.8402	13.1542	38.3724	18.6538	30.9535
PF3D7_0320600	NA	NA	0.471144	0.363764	1.02293	0	0	0.593043	3.31868	7.62003	21.0705	30.8334	31.2487	29.8499	28.5897	17.1178	43.4994	6.29658	25.9505	26.762	0	0	0	0.557147	0.598842	0	0	0	0	0	1.71315	2.63603	4.02514	4.28675	3.83743	1.78662	25.2834	7.68571	26.1802	22.4843	16.9393	18.9246	16.2371	15.3268
PF3D7_0320700	signal peptidase complex subunit 2	SPC25	0.696245	2.68781	1.88957	1.27593	6.31063	3.94374	117.703	114.015	127.664	121.084	187.224	224.167	264.058	210.419	323.019	106.425	237.99	194.833	0.448775	2.62097	0.306749	0.82334	0.884955	0	4.36628	1.90652	3.09458	0.562945	13.5022	9.25174	46.099	29.0348	54.6833	33.333	119.874	80.2616	202.147	179.815	158.717	136.206	186.572	152.885
PF3D7_0320800	ATP-dependent RNA helicase DDX6	DOZI	5.91969	5.46232	3.44825	4.23349	13.959	10.9043	95.8028	89.1256	84.1574	83.6406	90.9742	103.617	119.921	136.867	129.305	55.7171	97.536	107.219	0.372256	0.621165	0.381669	1.36591	2.20219	3.32399	5.13088	5.23854	6.88404	5.48676	16.6249	15.3485	42.7617	33.4988	48.5514	33.9459	83.9382	46.7919	65.5876	81.2655	96.8635	53.6987	66.819	96.5634
PF3D7_0320900	histone H2A.Z	H2A.Z	1399.45	1243.29	1233	1962.04	1580.83	2071.08	1388.56	1566.94	2518.61	2431.56	4535.1	4873.9	7010.49	4391.93	9539.26	3709.25	7251.42	8233.04	1673	2968.41	2513.84	2102.78	1974.12	2217	2321.13	2051.22	1716.3	1670.03	1311.21	1344.49	1131.29	1326.14	1355.05	1466.82	3618.24	1526.66	3083.94	4113.33	6511.59	3082.16	6987.23	2385.38
PF3D7_0321000	NA	NA	34.4451	36.7025	34.9091	22.0505	33.2812	23.9984	45.4814	40.9428	46.9905	47.4442	48.7485	27.8188	60.7386	54.7862	57.1109	30.3638	67.9494	49.7952	29.9851	16.1314	19.7116	19.69	24.3946	28.6767	19.6615	23.2321	20.7484	28.0559	40.0546	44.0907	50.1319	48.5715	50.4314	59.0438	45.4725	51.6974	23.1307	40.6761	14.3901	71.2866	37.9038	55.2121
PF3D7_0321100	NA	NA	0.407558	0.550673	0.479306	0	0.0342039	0.0427505	0.861238	0.869729	1.06323	0.61741	2.10571	0.743342	19.2354	16.8829	11.4454	3.68794	40.6049	29.1647	0.481613	0	0.0897802	0	0.129506	0	0.0354982	0	0.0274464	0.0823821	0.205826	0.142517	0.0967197	0.103006	0.0790364	0.096594	0.405022	0.147743	0.566173	0.0476711	0.129904	0.202105	6.25848	1.42982
PF3D7_0321200	UDP-N-acetylglucosamine--dolichyl-phosphate N-acetylglucosaminephosphotransferase, putative	ALG7	0	0.729355	0.341832	1.92351	1.9027	1.7836	17.3005	14.0052	15.9599	24.805	11.5775	20.8567	11.9423	13.0006	11.1444	3.1562	11.2225	15.1243	0	0	0.138731	0.186182	0	0.362466	0.987349	0.431123	0.890628	0.891093	4.77071	4.62465	11.4332	3.82001	12.0908	7.76149	12.2041	12.8417	13.7791	13.0383	11.5621	12.8823	13.731	17.4743
PF3D7_0321300	NA	NA	0.205001	0.105519	0	0	0	0	1.44401	1.93409	3.7691	1.73912	0.591164	0.157432	2.15969	2.48274	1.05151	0	2.21401	2.112	0.0880911	0	0	0	0	0	0	0	0	0	0.331297	0.0955813	1.1676	0.621742	1.11315	0.906951	0.407451	2.67533	0	0.767313	0.0522734	0.813269	0.624796	3.53061
PF3D7_0321400	pseudo protein kinase 1, putative	pPK1	0.391638	0.907136	0.63773	0.717709	0.394414	0	0.551731	0.263923	0.875743	0	1.41171	2.2557	20.547	13.5824	28.9271	10.4681	52.025	44.819	0.252436	1.4743	1.20782	0.231564	0.995575	0.450817	1.02335	0.268104	0	0	0	0.2739	0.278825	0	0	0.185642	0.2919	0	0.544056	0	1.04857	0.582631	13.4971	0.187359
PF3D7_0321500	NA	NA	0.990935	1.53018	1.13902	0.498502	2.34814	2.05441	16.5878	19.4051	20.6811	22.9591	23.9532	24.9113	29.6973	18.4829	28.6131	6.52428	29.1789	21.8138	0.0751438	0.250777	0	0.275723	0.222268	0.134197	0.182774	0.359135	0.612373	0.471302	7.3477	3.66899	14.5248	9.01612	15.4639	10.9969	10.8614	19.8418	10.5269	18.4088	9.72072	12.6607	10.6593	31.1208
PF3D7_0321600	ATP-dependent RNA helicase DDX42, putative	DDX42	10.8978	10.9777	12.5698	6.65701	16.3768	13.0743	62.3695	65.407	63.4596	71.9174	73.4091	68.2595	97.0843	74.9422	90.7901	28.5881	113.925	82.9954	2.96338	3.66285	2.17558	2.21496	5.30252	4.80218	8.80968	9.67508	10.2516	7.43454	27.7588	27.39	56.6136	45.1875	50.9189	48.8318	54.6996	70.6466	51.4488	66.8014	34.5833	60.9229	58.2039	79.1797
PF3D7_0321700	NA	NA	0.257471	0.397581	0.314443	0.0393198	0.0648241	0	7.75313	7.591	8.68396	5.57762	6.96068	2.33564	27.1381	22.1108	18.9678	5.10769	37.5913	27.4218	0.124468	0	0.0283589	0.190294	0.163628	0.0740942	0.0336385	0.0220322	0.208068	0.104088	0.585129	0.540204	1.7414	0.780876	1.94729	1.43403	2.83055	3.78009	1.20715	2.16834	1.35409	4.45277	6.47387	11.2704
PF3D7_0321800	NA	NA	16.4121	17.1218	18.7966	7.4378	12.0291	9.64445	24.5232	25.8951	23.6723	25.7814	19.0245	12.106	28.2689	29.1302	22.8325	19.4125	32.5499	26.8388	23.0074	15.2121	16.8072	15.2472	17.0649	19.7447	13.694	16.1794	13.8989	17.9864	22.6699	23.1829	21.8857	22.6763	21.1434	25.0613	16.7355	24.8218	5.46669	12.6065	9.75694	15.4622	15.8087	27.1758
PF3D7_0321900	cyclic amine resistance locus protein	CARL	27.8661	30.2944	28.9793	23.2529	23.886	25.0016	25.7818	26.1127	31.5013	29.8088	36.0976	36.822	69.8396	58.1901	63.6065	35.3827	73.2881	61.964	41.5851	50.2848	35.3478	36.704	28.1614	27.9197	18.5159	24.8226	20.3895	26.0822	28.9248	27.7143	19.3874	18.5013	20.0449	19.5704	20.7331	23.8301	19.2538	16.1659	19.7488	16.9163	33.5689	26.7089
PF3D7_0322000	peptidyl-prolyl cis-trans isomerase	CYP19A	7208.33	7446.39	7225.63	6877.55	7533.86	7439.9	13092.2	13668.5	11943.2	10092.7	8066.33	6638.69	5607.85	6819.78	4971.42	6363	4457.69	5116.86	6321.47	4352.16	5146.22	6741.43	5665.05	4841.56	4500.06	4932.37	5322.05	5216.43	6706.98	6704.57	9730.08	8344.89	9304.22	7464.69	6411.49	9001.7	8648.73	8145.9	7953.26	6807.84	6996.45	10327.2
PF3D7_0322100	mRNA-capping enzyme subunit beta	Prt1	17.1474	22.9644	22.2918	11.7678	16.736	14.789	30.8671	26.2496	35.3453	32.4547	22.5874	19.021	34.2561	36.7092	28.6665	19.4508	33.2658	34.0408	22.9239	14.2307	12.0316	13.5184	11.9738	11.4532	10.3994	16.2312	17.3642	16.3463	25.5304	25.9095	29.2389	26.4844	28.0806	28.3981	13.5694	35.1093	15.1454	20.2055	11.8217	17.7939	14.4426	35.8515
PF3D7_0322200	NA	NA	0.0831062	0.256661	0.180436	0.101533	0	0	0.117078	0.336029	0.619447	0.302154	0	0	1.57594	1.37248	1.15094	0	0.80779	0.83305	0	0	0	0	0	0.095664	0.347449	0.113784	0.13432	0.13439	0.100729	0.232488	0.236668	0.378075	0.0966991	0.0787868	0.123883	0.18076	0.11545	0.116649	0	0	0.116902	0.238548
PF3D7_0322300	diacylglycerol O-acyltransferase	DGAT	2.87441	3.10701	3.12039	2.80938	3.9562	3.97992	27.6709	24.7942	27.8524	24.3849	36.057	31.566	88.1808	78.3258	90.6736	27.3706	82.1101	72.1121	0.741097	0.82442	0.506558	0.906429	1.70496	1.3235	2.70389	3.34516	3.79402	2.24661	6.96787	7.237	12.2785	11.4783	12.4863	9.17421	16.2822	13.8586	16.1054	15.3313	17.5907	10.1203	35.6485	30.1608
PF3D7_0322400	NA	NA	13.572	20.0099	18.0249	9.08437	9.08788	8.90521	22.5777	20.6273	30.0255	22.3975	13.2194	8.81491	10.7692	10.73	9.33132	9.76859	12.5136	9.58823	18.7059	16.0726	16.6662	14.9396	12.4791	14.7918	6.86632	9.58752	9.39263	10.7984	20.9124	21.811	23.3339	26.7115	27.8877	26.4176	26.2576	28.3421	15.3439	27.5614	5.41199	38.8779	13.8614	26.5239
PF3D7_0322500	iron-sulfur assembly protein, putative	IscA2	0.773606	0.836208	0.167962	0.567079	1.55818	0.77901	6.10309	8.34127	13.6083	12.3757	12.4928	7.12913	23.2762	11.7538	23.3321	6.46177	39.3517	25.8485	0.398911	0	0	0.365929	1.17994	0.712402	0.646856	1.27101	0.625167	0.250198	3.93814	5.19396	7.71071	5.86561	8.28126	10.1209	10.148	9.59101	14.1858	11.0756	3.66908	10.8182	11.5349	17.4684
PF3D7_0322600	NA	NA	0.0464852	0.0358906	0.15139	0	0.140444	0.0585124	1.11328	0.689175	0.623674	0.78871	0.603224	0.160643	0.470133	0.153539	0.500716	0.155313	0.753058	0.349473	0	0.149992	0.0819211	0	0	0.0535094	0.291517	0.0318225	0.187828	0.263097	0.169028	0.520167	0.264759	0.775409	0.64906	0.176277	0.415763	0.707754	0.193729	0.782966	0.0711198	0.345775	0.457722	0.845063
PF3D7_0322700	NA	NA	8.53839	7.79526	8.30264	2.71912	6.35749	4.94081	17.2449	16.4984	18.7308	18.17	15.0534	7.94776	28.0854	20.8841	19.7081	10.8162	24.9438	24.2196	11.6592	5.11403	7.29185	5.95772	6.27498	8.05851	5.01198	5.66508	5.15051	6.9691	10.7414	11.094	9.82414	8.83648	11.4652	9.93605	8.89745	14.8968	6.21176	9.00264	7.36743	10.3545	11.911	13.8611
PF3D7_0322800	NA	NA	1.03289	0	0.747522	0	0	1.73351	0.485038	0.46404	0	0.834522	0.496426	0.396607	0.87052	0	0.5298	0	0	0.862802	0.887687	2.22186	1.51689	1.22144	0.437615	1.18897	0.359858	0.235696	0.278234	0.556758	4.59037	1.92633	0.490241	1.04421	1.20183	0	1.53969	1.1233	0.478291	0	0	0	0.726463	0.658846
PF3D7_0322900	40S ribosomal protein S3A, putative	RPS3A	2167.68	1943.13	1967.28	2345.28	2363.01	2379.14	2584.53	2592.75	2386.82	2393.46	2524.29	2667.73	2228.03	2331.36	2364.03	2446.66	1792.1	1878.59	2133.13	2351.95	2183.82	2490.12	2050.81	2280.48	2243.98	2272.87	2553.88	2267.21	2271.85	2295.18	2816.49	2675.09	2592.64	2579.27	2068.12	2679.48	1363.99	1920.59	2490.42	1630.48	1543.86	2239.08
PF3D7_0323000	translation machinery-associated protein 7, putative	TMA7	893.22	909.555	848.452	1295.88	997.079	1226.14	927.71	925.937	1586.32	1151.55	1900.63	1322.91	1595.87	1531.58	1905.68	1317.07	1950.88	1607.42	1221.97	1031.78	1120.36	1389.05	1052.77	1857.04	2273.24	1439.77	1757.62	1489.55	1206.91	1188.83	1082.04	1135.09	1212.98	1258.31	1153.17	1179.56	1009.77	1007.46	1628.04	1184.75	1213.99	1090.09
PF3D7_0323100	NA	NA	19.3712	17.4647	17.0612	19.3498	20.0811	17.1756	30.7796	33.2786	40.3799	42.5233	45.5554	37.3309	49.2862	36.2164	53.9297	24.3554	54.0127	43.9304	16.5433	22.2762	16.1744	17.7688	17.7048	16.6419	19.4827	20.6838	16.4091	16.9759	27.3183	24.6528	26.0212	27.8356	32.4154	28.3359	32.0239	36.5686	6.76985	24.3966	20.9384	21.0246	22.8501	41.8869
PF3D7_0323200	NA	NA	0.708847	0.328375	1.07731	0.173203	0.856646	1.4276	4.59359	8.59839	14.7938	14.9478	14.922	16.3309	22.9408	12.1747	28.3599	2.13151	21.3589	17.1714	0.365518	0.609922	0.249841	0.167648	0.180195	0.163192	0.592707	0.485257	0.916535	0.68776	3.26481	2.57788	3.43169	3.65473	2.96923	2.95682	9.29855	8.32561	15.5585	12.3373	6.94078	15.3962	13.7601	11.9367
PF3D7_0323300	NA	NA	0	0	0.156739	0	0.290812	0	0	1.94597	1.72189	1.22486	1.45725	0.831595	3.65057	1.19222	1.77739	0.482399	4.67798	3.6182	0	0.310582	0	0.341477	0	0	0	0.494202	0.583393	0.583698	0.174999	0.403908	0.205585	0	0.503994	0	1.07613	0.47106	0.802295	1.01329	1.32538	0.214795	0.913938	0.828871
PF3D7_0323400	Rh5 interacting protein	RIPR	0.749409	1.15722	0.813541	0.774712	0.580554	0.870742	0.974538	0.932349	0.343745	1.3274	0.664947	0.730457	3.93536	2.76087	7.98355	1.15563	25.775	23.4991	0.743142	1.61206	0.914321	0.749868	0.586171	0.398145	0	0.11839	0.0931712	0.18644	0.349355	0.080633	0.574579	0.262253	0.402453	0.437205	0.42966	1.19116	1.20123	1.05188	0.308687	1.02912	2.63541	1.54438
PF3D7_0323500	survival motor neuron-like protein	SMN	9.32	13.9324	13.7771	6.29888	7.18932	7.48811	35.7577	38.486	36.0643	29.5595	26.0184	27.411	31.8373	38.9706	36.9217	18.2197	38.549	33.2943	16.1048	18.7686	11.1828	5.3934	10.5859	15.9783	10.9848	9.63819	11.8584	13.1473	21.8716	14.1457	31.906	21.6508	23.3039	27.4467	18.3269	29.1133	12.9472	14.195	16.2311	32.4503	18.2704	31.8748
PF3D7_0323600	NA	NA	4.66931	6.7055	5.87992	3.42276	4.51431	1.76322	7.89361	11.0761	16.4272	14.5998	14.1382	10.7574	15.8199	7.4028	14.2264	5.61625	21.0286	13.5734	5.65818	3.71634	1.64575	3.53386	3.20483	4.19239	1.56171	3.58005	2.33949	2.86926	11.998	8.75174	10.2388	9.2049	14.0172	12.8372	14.1992	15.234	12.3244	10.2241	4.28626	11.5311	7.22494	11.8838
PF3D7_0323700	U4/U6.U5 tri-snRNP-associated protein 1, putative	SART1	31.6922	39.5968	33.8162	13.0167	21.2779	11.3652	68.3065	67.1748	66.0887	49.0227	43.0918	23.7141	71.113	75.0042	46.9613	37.5583	93.9061	66.8245	40.2734	15.441	22.9929	18.2582	22.4937	30.6607	19.8181	21.2011	21.3791	29.3477	48.1526	49.0021	64.6681	61.0666	63.0355	66.082	35.802	68.9322	22.5776	36.3726	13.1233	58.9683	46.5488	68.4212
PF3D7_0323800	NA	NA	31.5233	31.9569	32.6907	17.5342	24.907	19.3558	17.3304	20.3798	21.9682	31.0599	23.0955	21.1824	33.5337	21.0568	29.3806	24.083	29.3742	20.4985	37.1685	29.6323	29.5834	33.1104	36.4026	23.306	15.6704	23.2028	19.9862	21.9134	28.1899	28.2302	18.3374	15.74	20.9489	20.4092	29.6079	26.8266	5.96348	19.2454	8.13616	19.1589	22.0811	31.5101
PF3D7_0324100	Pfmc-2TM Maurer's cleft two transmembrane protein	MC-2TM	1.35048	0.834148	2.34567	2.96983	4.08015	7.81948	7.61008	9.10079	10.4687	8.83802	10.5148	14.0009	1.02436	0	0	0	0.437553	0	0.696376	0	0	0	0.343302	0.621816	4.79914	3.32819	3.92885	0.655151	10.4758	10.956	18.8447	11.4683	30.4844	27.9102	30.1966	22.0302	6.7538	17.0599	7.85138	19.2871	2.46956	12.9213
PF3D7_0324300	exported protein family 4	EPF4	3.23417	3.58953	2.41377	0.740861	3.05353	1.52661	0.854292	1.08975	1.50665	1.46984	0.582901	0.232847	0.25554	0.333822	1.55522	0.33768	0.327459	0.844247	2.34521	3.04371	5.16526	4.78068	2.3123	2.55948	0.633814	3.18266	2.2869	3.59558	5.87998	4.24104	3.16601	4.29136	4.70394	6.32379	1.8079	3.9569	0.280803	1.98604	0.927769	1.50356	0.568672	2.90105
PF3D7_0324400	rifin	RIF	0.358069	0.27646	0.194356	0.21873	0	0.225356	0	1.44781	0.533786	1.73581	0.774425	1.44365	0.226335	0.295671	0	1.19635	0.290035	0.598209	0.461597	0	0.47327	0.211716	0.22756	0.206088	0.374252	1.22562	0.578726	0.579029	1.085	0.500846	0.509851	2.44345	2.91644	1.52756	1.86816	1.55764	0	0.753885	0.821738	1.06538	0.629602	0.6852
PF3D7_0324500	rifin	RIF	0	0.15214	0	0	0	0.248034	0	0.265583	0.29375	0	0	0.680966	0	0.325424	0	0	0	0	0	0	0	0	0	0	0.205956	0	0.636963	0	0	0.826869	0	0.597628	2.2928	0.934045	0.587473	1.07149	0.273739	1.10633	0	0	0.138592	0.188538
PF3D7_0324600	NA	NA	0.20749	1.2816	0.67574	0	2.08961	2.87292	9.06153	7.83029	3.40244	5.78362	1.19668	1.19507	0	0	0	0.69325	0	0.173322	0	0	0	0.245366	0.791185	0	1.08434	0.852253	0.838386	0.167765	2.76638	3.77293	8.27242	7.23684	8.93282	3.34401	3.71158	5.18998	0.288242	2.91236	2.38086	0.308679	1.45934	3.17642
PF3D7_0324800	rifin	RIF	1.51602	3.12133	3.47437	3.70431	11.0266	8.90521	13.7636	10.8975	5.27329	16.1274	10.6865	18.8218	3.19425	1.66911	1.81442	2.5326	1.36441	5.3469	0.651448	0.724692	0.296854	0.597586	8.77819	4.26579	5.63391	4.03598	7.75913	6.26503	25.9291	21.4408	46.5308	43.9353	47.0394	42.7974	41.6821	37.7371	7.72209	19.1511	5.15427	20.2981	8.88551	13.0547
PF3D7_0324900	erythrocyte membrane protein 1, PfEMP1	VAR	1.67484	2.60854	2.47647	0.458628	0.610706	0.508869	12.9364	15.2564	9.90087	5.45939	3.24759	1.86277	24.2033	38.6757	9.9534	5.25815	41.1195	37.0986	2.49412	0.962805	0.610671	0.546364	0.844174	0.598319	0.754541	0.790723	1.05011	1.23744	4.86498	4.48338	11.8417	9.63366	10.1135	8.24009	0.688724	9.70383	0.521492	0.810629	1.10449	0.730303	2.78243	6.65859
PF3D7_0400100	erythrocyte membrane protein 1, PfEMP1	VAR	0.49713	1.11493	1.07935	0.52059	0.166885	0.297978	16.875	18.8246	15.6688	8.09048	5.42712	2.67241	29.7177	39.6816	13.2232	6.56479	54.802	51.1964	0.549313	0.35646	0.563204	0.307936	0.180535	0.109	0.123714	0.113441	0.229566	0.287108	2.81189	1.98673	7.1123	5.77963	7.24428	3.45614	1.1998	11.7139	0.72349	1.29587	2.5896	1.86653	2.89707	11.5289
PF3D7_0400200	NA	NA	25.2215	66.6442	55.44	7.65556	37.706	30.9583	654.352	795.569	566.781	287.439	190.638	79.2202	701.668	836.676	304.94	120.906	1238.96	1204.03	11.1072	4.71775	6.07363	6.29855	10.5531	9.37699	16.8647	17.9094	31.6491	21.5326	267.533	234.897	641.966	460.386	618.833	381.976	47.6382	699.525	21.5446	69.0433	62.1953	67.1191	70.8459	497.776
PF3D7_0400300	rifin	RIF	2.19571	1.30406	0.733418	2.26984	4.42254	5.31501	6.18652	2.73171	2.01429	8.39246	10.2283	12.452	0.427048	0.278935	0.259902	0.846475	0.547236	1.83413	0	0.181661	0	0.599196	4.29358	2.13865	3.70722	3.69999	6.00565	2.73127	15.5584	13.2299	25.9735	30.9913	32.6233	30.1029	28.1987	25.7157	2.8156	13.7501	5.03896	12.3122	3.08861	7.75698
PF3D7_0400400	erythrocyte membrane protein 1, PfEMP1	VAR	0.126481	0.23716	0.333454	0.0220749	0.0545902	0.159205	0.560003	0.487055	0.538712	0.284671	0.0781571	0.0624415	0.411163	0.328239	0.361449	0.241478	0.468338	0.769755	0.0698785	0.0971689	0.0636849	0.0641009	0.0918639	0.0831957	0.0566558	0.0989544	0.131415	0.0876557	0.153301	0.176914	0.360189	0.383599	0.21024	0.308332	0.0538686	0.334052	0.0502013	0.0507227	0.06911	0.161282	0.101666	0.328473
PF3D7_0400500	rifin	RIF	0	0.12632	0.17761	0	0	0	0	0	0.243897	0.396561	0.2359	0	0	0	0	0	0	0	0	0	0	0	0	0	0	0	0.132216	0	0	0.228846	1.39776	0.992406	0.951842	0.620421	0	0.711714	0.227282	0.459286	0	0	0.115071	0.469621
PF3D7_0400700	rifin	RIF	0.822337	1.26983	1.78542	2.61213	4.30646	7.03869	5.79245	3.10334	4.90355	8.17218	8.53697	10.2306	0.415839	0.271614	0.25308	1.09901	0.266436	2.47291	0	0	0.144921	0	2.50853	1.89319	4.46942	3.2651	3.85438	1.19681	9.56847	8.7418	18.7347	23.6934	26.2174	16.9952	16.9164	19.3172	6.3973	7.1563	3.39695	9.29763	3.35457	5.66504
PF3D7_0400800	NA	NA	0.432152	0.333659	0.703702	0	1.08804	0.815945	5.17485	4.36838	1.93267	2.3568	0.623101	1.99124	0	0	0.997485	0	0	0	0	0	0.190396	0	0.274641	0	0.451684	0.295839	1.39693	0.174707	1.83327	2.11564	5.53804	6.5533	4.02268	3.89207	2.25468	3.75981	2.10118	4.5493	2.31409	1.92871	1.6717	3.30786
PF3D7_0400900	rifin	RIF	0.37977	0	0.82454	0.231987	2.10354	1.19507	1.87254	1.0237	0.283068	1.84101	1.64272	1.96861	0	0.627182	0.292193	0.634428	0.307613	0	0.244787	0.408463	0.167318	0	0.724054	0.218578	0.595401	0.90993	0.613801	1.07471	1.3809	4.5152	5.13714	5.47101	5.74451	6.48058	6.79332	3.71709	2.37406	4.53092	1.16205	3.95483	1.33552	1.63514
PF3D7_0401000	rifin	RIF	0	0	0	0	0	0.254435	0	0	0	0	0	0	0	0	0	0	0	0.675398	0	0	0	0	0	0	0.422543	0.41513	0.16335	0	0.734998	0.282736	0.287819	0.613051	0.705591	0.95815	0.602633	0.439656	0	1.13488	0	0	0.142168	0.580209
PF3D7_0401200	rifin	RIF	0.510832	0.131469	0.924246	0.624095	1.20039	1.50033	2.63871	1.83598	3.04606	3.3018	1.47309	2.15763	0	0	0	0	0	0.142237	0.21951	0	0	0	0.865717	1.17604	1.06784	1.0491	0.963233	0.275353	2.68301	1.42904	5.5765	5.68072	12.4821	7.74851	5.07653	5.18507	2.60201	2.15103	2.08412	4.55972	0.239522	2.11797
PF3D7_0401300	rifin	RIF	1.33324	1.02937	0.723665	1.62884	4.02806	6.71274	4.93036	7.4123	4.72032	7.47297	6.48787	11.3265	0	0	0	1.39203	0.269979	0.139211	0.214839	0	0	0.197076	0.847298	1.91837	2.96117	1.48313	4.04031	1.34747	9.49372	6.76009	21.3568	17.4377	23.0756	15.4833	16.6445	13.2306	5.78783	13.3333	3.18715	6.44613	3.04754	7.01601
PF3D7_0401400	rifin	RIF	0.189885	0.146608	0	0	0.573693	2.62916	1.87254	1.27963	1.13227	0.690377	1.09515	2.40608	0.480105	0	0	0.317214	0.615226	0.317232	0	0	0	0	0.724054	0	0.793869	0.38997	0.920701	0.921182	2.53166	2.656	5.13714	5.47101	5.74451	5.76051	2.26444	3.30408	0	1.59915	0.290514	1.41244	1.73617	2.72523
PF3D7_0401500	NA	NA	0	1.26485	0	0.500364	2.47476	2.06208	13.2704	9.38392	1.83162	0.992699	0.59052	1.41534	0.51776	0	0	0	0	1.02634	0	0	0	0	0	0	0.856133	0.841112	0.330971	0.331144	5.46044	5.15577	15.7454	4.96852	6.6716	4.65924	8.54715	8.01725	5.12053	1.72457	0.626598	3.04644	2.01637	3.91863
PF3D7_0401600	rifin	RIF	81.0286	91.3392	78.3846	102.514	136.549	126.925	118.21	101.929	94.4863	126.133	72.1758	100.184	11.3818	12.4896	12.1915	57.1532	8.16765	12.1834	55.4779	89.8618	57.7535	71.9713	91.3182	66.5343	95.0418	84.9306	101.277	76.7255	164.34	140.035	245.622	240.834	242.618	253.155	224.931	188.97	82.2963	215.081	56.1993	157.511	37.36	138.172
PF3D7_0401800	Plasmodium exported protein (PHISTb), unknown function	PfD80	827.564	1062.48	1193.4	795.578	1355.6	1490.75	991.974	727.731	506.193	872.718	683.662	590.712	73.2866	70.8346	60.8448	422.828	156.34	185.208	56.1569	17.4197	55.5101	49.5325	1096.3	625.647	1207.96	976.684	1229.68	924.614	5007.95	4000.88	8727.56	8379.97	9645.97	9260.02	1764.76	5531.42	175.029	511.728	424.064	681.626	359.176	1588.54
PF3D7_0401900	acyl-CoA synthetase	ACS6	0.193402	0.248871	0.629857	0.236283	0.129848	0.486881	0	0	0	0	0	0	0	0	0	0.538481	0.208873	0.107702	0.831065	0.693378	0.965692	0.762352	0.655522	0.593668	0.134762	0.308927	0.104195	0.312747	0.390688	0.721383	0	0.19552	0.0750114	0	0.0960989	0.350549	0	0	0	0	0	0
PF3D7_0402000	NA	NA	10.6628	17.1418	19.0278	3.74748	22.5064	19.4889	148.98	138.79	119.324	92.4043	68.8679	39.5405	4.24708	13.2673	3.82098	5.12423	13.251	15.8616	0.564892	0	0.257412	0.345457	9.4684	6.89361	14.8087	9.79925	22.6634	12.991	153.139	121.767	322.371	226.593	311.699	220.589	99.287	272.587	6.89899	40.7988	22.7941	65.4068	21.2656	101.183
PF3D7_0402100	NA	NA	31.2223	35.0255	32.9494	19.5376	26.8421	20.4034	6.59011	8.6508	5.35176	4.08713	3.76457	3.13292	3.98837	6.46781	5.69167	17.0833	23.9682	19.3561	34.3594	29.1349	19.1718	23.2851	21.4325	28.1761	19.8984	21.4484	33.5832	28.4111	21.3609	23.1294	13.4765	10.5581	7.59491	10.9322	1.946	10.293	0.755634	1.98506	2.16372	1.13289	2.06588	5.62078
PF3D7_0402200	surface-associated interspersed protein 4.1 (SURFIN 4.1), pseudogene	SURF4.1	3.39734	10.3173	7.8679	0.184471	0.45619	0.760238	2.55258	4.27364	3.71399	1.09795	0.326565	0.347867	6.10832	7.85488	4.18223	2.27018	58.8282	54.992	4.96356	0.243601	2.46138	2.67834	0.863631	3.38927	0.394543	0.516828	0.915154	1.22084	0.64054	1.1616	0.644992	1.03037	0.614913	0.214718	0.33762	0.492626	0	0	0.0577527	0.224629	1.91156	0.722349
PF3D7_0402300	reticulocyte binding protein homologue 1	RH1	0.210842	0.260461	0.205996	0	0.0637008	0.185775	0.62376	1.19351	0.502894	0.306628	0.334403	0.0728625	1.49266	0.905319	1.29776	0.176112	15.9509	9.72191	0.489244	0.0680313	0.055735	0	0.187591	0.218431	0	0.0577345	0.0170385	0.102285	0.485547	0.294913	0.450323	0.287754	0.343457	0.279836	0.220006	0.687887	0.0878691	0.0887819	0.0161288	0.43913	0.311411	0.342946
PF3D7_0402400	Plasmodium exported protein, unknown function	GEXP18	54.7986	80.6343	74.4268	29.4214	64.8386	65.265	196.286	239.124	306.613	276.367	187.077	111.246	186.394	130.675	192.847	52.1351	283.836	185.357	109.607	89.8618	71.8876	111.296	47.1629	40.4498	24.3998	44.2425	31.376	33.9754	165.005	122.707	300.562	201.97	336.535	245.775	251.653	275.259	135.865	162.455	73.4999	261.75	190.979	207.139
PF3D7_0402500	rifin, pseudogene	RIF	0	0.35574	0.50018	0	1.85607	0	1.94728	3.10497	2.06057	1.67518	2.65734	5.83828	0	0	0	0	0	0	0	0	0	0	0.585632	0	1.9263	0.315417	0	1.49015	3.35072	3.86683	1.96817	6.98698	2.68056	3.49443	1.37365	5.01078	0	0.646715	1.40985	0	0.972179	3.08592
PF3D7_0402600	NA	NA	0	0.160201	0.67574	0	0.208961	1.0447	3.21538	2.23723	4.6397	1.76023	0.598342	2.62916	0	0	0	0	0	0	0	0	0	0	0	0	0.216868	0	0.335355	0.503295	1.00596	0.870676	4.13621	3.77574	3.62141	3.1473	0.618597	3.61042	3.17066	2.62112	1.90469	4.63018	1.02154	1.58821
PF3D7_0402700	rifin, pseudogene	RIF	0.566224	0.437174	1.43425	0.691768	2.09087	4.27634	2.65894	2.28945	1.40682	1.82992	2.44924	2.17417	0	0.311702	0	0.94591	0	0.157661	0	0.812004	0.16631	0.223195	1.67928	0.217261	1.97272	1.55048	0.457577	1.67866	3.88899	3.168	11.0186	9.73126	7.68641	8.05192	5.0643	5.13152	1.04878	2.38427	0.577527	2.52707	0.663737	2.16705
PF3D7_0402900	NA	NA	0	2.41903	0	2.29667	2.52425	3.15499	0.882769	0	1.86825	1.51883	3.61398	5.05277	0.792173	1.03485	0.964236	5.23403	10.1512	7.32806	8.07796	6.06567	3.31289	5.92805	1.59292	7.93438	11.7889	2.5738	7.0894	6.58645	3.03799	0.876481	3.56896	2.85069	1.45822	4.15837	2.80224	3.40733	0	0	2.39674	14.9154	1.32216	2.3982
PF3D7_0403100	NA	NA	1.99879	1.08027	1.30191	1.22098	1.30842	1.25797	8.44755	7.81245	9.98189	11.264	9.36639	10.3611	16.6773	15.0193	13.6869	5.1756	15.7044	15.1103	1.67486	1.0749	1.14481	0.82728	0.88919	0.920328	0.313369	0.547327	0.726869	0.161611	2.6649	1.25811	3.13066	2.72793	4.76771	2.17914	7.29984	9.12969	2.08251	4.62912	6.57478	5.3524	5.34207	12.5265
PF3D7_0403200	NA	NA	146.882	232.589	189.159	25.7915	57.1444	43.1632	243.115	247.043	235.946	140.918	115.474	31.5235	167.896	250.504	113.44	105.614	256.947	190.339	216.276	19.1016	35.0383	58.2502	83.9051	80.6167	38.8762	24.4687	37.0086	70.624	182.902	209.668	232.205	193.772	183.902	190.393	58.4425	220.474	15.9823	45.3092	15.2947	84.414	44.1507	258.843
PF3D7_0403300	NA	NA	2.04778	4.74319	4.44605	8.00582	2.47476	2.57761	7.50065	7.72794	10.9897	14.3941	31.2976	22.6455	15.5328	12.1747	19.5368	5.4735	15.26	19.5004	8.97551	16.2985	3.24793	8.2334	3.12337	2.35721	2.14033	1.40185	3.30971	1.65572	5.46044	3.43718	8.16428	7.45277	3.81235	7.7654	23.1994	13.3621	32.43	15.5212	8.77237	24.9808	9.50575	9.01284
PF3D7_0403400	NA	NA	9.00788	9.68623	10.081	2.50116	4.40391	3.09232	12.1594	13.8184	16.3338	11.5321	8.66657	3.71666	20.2288	16.7156	14.2644	8.83739	24.1708	18.4693	15.6872	4.35099	7.99504	6.72057	7.7023	9.99197	4.1426	5.0902	4.57944	7.49514	11.0173	11.5001	9.49141	8.54361	10.3478	10.0303	6.76269	15.3	2.20694	4.7126	2.78137	7.84557	8.52414	15.4197
PF3D7_0403500	NA	NA	3.59409	3.86079	2.37492	4.58188	4.40642	6.09755	5.72369	9.26692	10.0168	14.2035	13.2933	12.0604	23.3108	12.1292	17.313	5.48203	17.4672	15.7944	3.62602	5.37826	2.75386	2.03268	3.17789	2.15852	1.46994	2.03251	1.64165	2.02155	8.14424	5.90149	12.4602	8.7677	14.364	10.8144	12.3457	10.3664	5.64408	11.8441	3.4666	4.18448	2.63773	13.7553
PF3D7_0403600	NA	NA	0.0814852	0.377482	0.265375	0	0.410314	0.102568	9.98711	9.00564	8.26015	10.4679	14.3337	18.3037	16.4822	17.0905	24.4507	4.08377	15.8407	13.8856	0	0.175283	0.0718008	0	0	0.187596	0	0.22313	0.329249	0.131769	1.18517	0.68386	2.6686	1.23567	3.12882	1.31325	10.3247	3.36745	12.5649	10.5224	11.0954	7.63709	15.8751	11.8507
PF3D7_0403700	pre-mRNA-splicing factor CLF1, putative	CLF1	66.0319	72.2302	71.073	46.8548	67.6312	49.1831	161.069	144.363	102.383	106.182	99.2573	76.4339	84.796	136.876	85.4355	81.8949	92.1539	80.0229	62.3689	49.3607	48.64	57.307	55.3749	52.274	53.5023	58.0561	69.1174	66.364	80.8121	76.8744	115.614	98.4296	110.44	92.3406	101.182	110.902	71.1105	126.243	73.2831	108.619	71.2716	128.968
PF3D7_0403800	NA	NA	5.6268	5.92415	3.70202	3.95798	3.43435	2.36088	2.6423	3.21735	3.43148	2.3764	2.70434	2.25877	11.5323	12.1084	10.6263	7.83325	21.5455	19.3706	3.95655	4.03461	4.13172	2.52043	3.35922	7.55655	4.99003	6.18647	3.92707	6.41068	5.16665	4.53146	4.00597	3.49064	3.67035	4.60694	2.16046	3.24508	0.473736	1.43597	3.13043	1.14148	3.11803	2.52871
PF3D7_0403900	SET domain protein, putative	SET8	0.211161	0.0407587	0.28654	0.38697	0.159494	0.265795	3.9416	4.83821	5.11526	5.94992	12.1785	15.4459	17.5519	10.549	22.0141	7.76066	17.6171	14.5962	0.272214	0.624566	0.0930326	0.0624268	0.0670985	0.182302	0.165529	0.180694	0.170644	0	0.255939	0.14768	0.601341	0.480318	1.65847	0.550512	6.92495	1.89456	13.4937	5.1868	8.56122	4.55503	10.4332	4.79842
PF3D7_0404000	NA	NA	1.25324	0.967612	1.36049	0	0	0	0	0.844553	0	0	0.903496	0.721824	5.54521	15.5227	6.74965	0	32.4839	14.6561	0	0	0	1.48201	0	0	0	0	0.506385	0.50665	0.759498	0	0	0	0	0	0	0.681466	0	0	0	0	3.52577	0
PF3D7_0404100	AP2 domain transcription factor AP2-SP2, putative	ApiAP2	0	0.0638828	0.0299404	0	0.0555513	0.034716	0.155417	0.111517	0.0411147	0	0.198833	0.0953113	0.523002	0.273288	0.25464	0.0921485	0.848914	0.921537	0	0.0593278	0.0243023	0.0652294	0	0	0	0	0	0	0	0	0.0392711	0	0.0641823	0.0261467	0	0.0599882	0.0766277	0.154847	0	0.246182	0.193979	0.0791659
PF3D7_0404200	NA	NA	0	0	0	0	0.384794	0.480943	3.22964	5.14971	6.83507	6.48281	9.91642	8.3626	17.8722	9.46509	15.8746	2.55319	12.9985	8.93666	0	0	0	0	0	0	0	0.523131	0	0.308933	1.38932	0.534439	1.0881	1.15882	0.44458	1.08668	3.98693	3.73975	2.12315	4.2904	3.21513	3.41052	4.56845	8.7739
PF3D7_0404300	NA	NA	295.86	360.787	361.004	136.395	203.897	141.775	339.698	377.51	350.741	261.95	245.173	121.751	461.892	561.308	362.656	303.607	545.95	456.265	366.959	140.871	175.255	206.942	206.046	229.631	148.087	184.008	169.863	224.786	258.494	323.965	247.907	254.998	227.963	242.227	182.382	293.721	92.1452	168.809	118.851	243.23	313.874	403.463
PF3D7_0404400	6-cysteine protein P36	P36	0.659601	0.254635	0.89506	0	0.332138	0.622695	0.464615	0.222251	1.72076	0.199846	3.80419	4.17898	12.508	7.35288	10.4036	3.58118	12.5555	14.8765	0	0.709435	0.145302	0.195002	0	0.75927	1.37882	0.225772	0.666297	0.266658	0	0	0.2348	0.50012	0.191871	0	0.491622	0.179333	0.916305	0.231456	3.02746	0.245318	5.45102	0.157776
PF3D7_0404500	6-cysteine protein P52	P52	2.35473	3.43411	2.84027	3.83577	6.3238	5.92795	1.29006	3.70263	3.12025	1.10979	0.754485	1.05486	1.15766	2.80857	1.00651	2.1854	0.423851	1.09276	2.36099	3.65826	2.53596	1.39229	0.831378	2.25879	10.3916	14.3288	12.8975	13.7504	4.75677	4.57453	2.23525	2.38053	2.28323	5.82891	2.9251	2.2763	0	2.75428	2.10152	3.50308	0.552052	4.38084
PF3D7_0404600	NA	NA	23.2087	21.7765	23.0912	14.7045	24.532	19.4948	13.4154	13.1407	15.3694	14.9351	12.0714	6.95839	14.7564	12.1262	12.2073	14.7954	14.8381	12.052	15.5743	8.49986	11.5392	9.91827	19.1466	21.0693	28.5775	29.4131	25.2887	30.0759	23.9465	24.8608	9.57125	11.3642	9.47721	12.2427	11.7578	19.3293	3.59637	15.5762	6.40442	12.3199	7.91147	27.1746
PF3D7_0404700	dipeptidyl aminopeptidase 3	DPAP3	1.99985	3.13959	2.74993	0.407211	0.268537	0.671274	1.40867	1.07815	1.9875	1.61578	4.80583	4.14665	57.1376	53.614	57.1361	18.2634	150.756	119.499	0.773421	0.932077	0.822349	0.630643	0.338919	0.767348	0.139349	0.273809	0.538708	0.808484	0.484786	0.559456	0.189838	0.505441	0.15513	0.379183	0.695593	0.579971	1.29647	0.374269	2.49873	0.694199	22.7393	3.12531
PF3D7_0404800	NA	NA	2.20641	1.8739	2.39523	1.88693	2.66646	3.05501	0.621668	1.04082	0.822294	0.401099	0.795331	0.635409	1.95254	2.1863	3.3952	1.65867	2.8595	1.93523	2.13326	2.61042	0.874883	1.17413	0	1.14292	2.53675	3.62507	3.38779	3.83556	1.47086	1.85172	1.25668	0.669175	1.15528	1.25504	0.328902	0.719859	0.613021	0.929083	1.68784	1.96946	1.55184	1.89998
PF3D7_0404900	6-cysteine protein P41	P41	13.5575	18.6374	12.0254	7.27178	19.6479	20.8113	26.7859	22.7294	27.1118	28.453	67.2258	61.3265	160.525	137.889	185.978	59.3835	230.612	223.598	17.6905	16.0044	14.8599	13.8816	12.6089	16.748	17.4536	16.0721	21.3777	18.0469	23.6466	20.8135	20.2461	22.0634	20.392	22.8844	16.0199	21.7566	22.7384	14.6202	38.9549	9.59266	105.587	33.3786
PF3D7_0405000	ATP-dependent RNA helicase DDX51, putative	DDX51	43.356	45.6549	44.7908	37.7387	43.5522	34.9937	47.2468	47.2831	44.7328	47.196	33.8811	41.5557	28.4513	30.7904	24.1059	26.1702	26.6291	28.1069	39.6787	46.8689	39.953	31.3101	32.8119	41.399	40.3573	39.6493	39.9403	41.3883	47.736	46.9102	49.9528	44.6674	49.5487	51.5613	31.2457	48.2305	11.8007	27.2531	26.4147	33.4808	20.1739	44.0162
PF3D7_0405100	protein transport protein Sec24B, putative	SEC24B	29.9628	31.0481	31.2681	19.0397	23.3087	20.4922	56.7168	52.386	45.9803	55.3681	52.4977	56.5278	107.069	102.489	92.0699	47.6526	111.957	104.57	31.9889	26.2402	23.0096	23.0913	22.5202	18.1528	13.7678	18.3843	17.2044	23.1011	26.9844	27.8969	32.8894	26.446	31.0857	29.3289	23.3693	35.5109	10.6314	18.5542	30.7265	18.6304	34.7749	48.106
PF3D7_0405200	protein CERLI2	CERLI2	3.56526	4.5044	4.10493	1.58391	2.50249	2.31185	20.395	22.8612	23.9974	24.6155	18.3815	8.96058	39.4721	41.2156	30.922	12.4534	57.932	56.1337	0.835651	0.697204	0.666386	0.383279	0.961245	0.621816	2.59718	1.40524	1.74616	2.70796	6.67834	4.23129	12.6144	9.82995	13.4508	9.32048	13.5281	17.2716	11.1063	12.7381	9.25636	18.8049	16.565	26.773
PF3D7_0405300	liver specific protein 2, putative	LISP2	0.765339	0.467802	0.380799	0.272717	0.642303	0.481678	0.853568	0.558737	0.380306	0.386471	0.551753	0.110202	0.322513	0.157992	0.196282	0.585999	0.10332	0.452843	0.534419	0.20579	0.252892	0.603364	0.405323	0.403785	0.599946	1.04786	0.97927	0.953998	0.270559	0.624465	0.590286	1.11223	0.519468	0.846487	0.285216	0.485523	0.0442998	0.447599	0.121971	0.948814	0.0897142	0.610229
PF3D7_0405400	pre-mRNA-processing-splicing factor 8, putative	PRPF8	67.0167	61.4743	68.1763	48.979	70.7909	58.4583	152.184	137.761	114.197	112.157	94.4682	84.2167	120.884	141.752	103.124	92.3673	101.318	116.016	54.3852	51.0253	52.6451	50.1248	55.0438	51.9194	51.5268	59.1283	61.0181	63.0042	73.9645	75.4382	100.345	93.3872	99.8024	93.1699	58.3019	100.102	32.2445	58.514	74.7519	51.4692	63.5442	106.608
PF3D7_0405500	NA	NA	21.4444	18.9222	19.0469	23.4771	33.3762	29.7971	33.349	28.9025	38.1954	34.7643	40.1554	55.5003	24.9975	17.0175	33.4268	20.0056	15.3396	11.3992	27.6446	43.1337	25.0307	23.0535	26.1947	21.4789	33.1837	25.738	35.3344	29.4983	27.6795	22.5937	48.3792	28.2957	36.6176	41.4517	44.8359	33.0133	34.4327	76.617	28.9739	48.0606	16.0618	32.5089
PF3D7_0405600	NA	NA	9.51829	10.8703	12.7008	12.1132	7.98814	9.98414	25.4215	31.8044	45.5239	44.2191	52.6086	50.7104	65.1788	37.3332	63.4687	21.5324	49.1499	55.6562	9.20273	11.3038	2.79569	10.0833	10.8379	9.13047	6.2178	7.87345	6.24969	6.89429	23.0733	19.6931	37.8355	27.6649	30.2258	27.4467	34.5847	34.5046	17.6302	31.4516	22.9055	20.9452	19.944	38.3256
PF3D7_0405700	NA	NA	1.24494	1.38173	1.57673	0.760487	2.01125	1.99146	7.08846	5.52315	4.36905	5.24927	5.04851	5.43758	4.16416	4.96865	2.23498	1.64647	3.40335	3.50977	0.0334352	0.0278958	0.137123	0.0920123	0.725253	0.537398	1.49097	1.10083	1.88637	1.25824	4.58968	4.93383	8.64172	9.3607	8.29907	8.75343	4.52349	7.55931	0.936786	4.76899	2.2023	3.08679	1.69648	8.83443
PF3D7_0405800	NA	NA	0	0	1.32086	0	0.612682	0.765774	10.2847	9.0195	20.8591	28.0172	42.1047	63.072	31.5331	27.1271	73.0198	5.08159	30.5522	19.8193	0	0	0	0	0	2.10089	0	0.416473	0	0.491893	2.21213	0.850952	10.395	1.8451	9.91025	5.7675	59.8538	12.5707	79.4428	84.5376	29.7847	64.2591	33.8029	40.164
PF3D7_0405900	apical sushi protein	ASP	3.42416	4.36218	3.99598	1.25501	0.689686	0.754266	2.41194	2.76903	3.06271	2.0749	3.70285	3.64857	85.0612	78.7447	71.6591	24.1681	263.349	232.971	2.86922	1.47314	1.58403	2.22707	1.19687	1.77371	0.447364	0.586021	0.484248	1.17665	0.518782	0.598689	0.975125	0.778876	0.996053	0.649238	2.80735	1.95503	2.37839	1.68217	1.7026	1.27351	38.2922	3.93147
PF3D7_0406000	NA	NA	33.3623	24.523	32.609	18.6501	23.8043	28.3577	50.2953	52.2661	60.7457	42.9689	43.666	34.3186	77.3497	76.2414	58.915	35.5791	87.9507	75.1728	21.7422	20.2586	18.875	19.3622	16.8993	25.3662	30.238	29.4968	32.8305	30.8569	37.7511	35.8169	42.2455	43.311	47.4137	42.3657	32.1148	47.1269	25.653	37.4968	37.6697	33.5156	42.7733	51.3563
PF3D7_0406100	NA	NA	685.232	610.573	633.384	738.337	866.532	875.748	617.582	644.078	665.588	717.532	746.16	714.096	937.005	820.563	999.883	803.609	746.474	914.58	579.165	572.12	646.627	662.714	763.797	607.792	679.816	863.914	778.299	747.795	720.679	729.338	627.271	729.66	659.735	719.824	585.924	622.544	560.455	615.14	838.616	527.499	773.621	748.287
PF3D7_0406200	parasitophorous vacuole membrane protein S16	Pfs16	230.025	262.112	266.501	211.739	303.549	320.491	296.677	347.977	367.738	335.488	470.047	542.739	320.88	288.186	307.579	198.098	446.525	462.808	155.424	110.052	142.58	127.097	158.788	143.805	178.244	216.384	230.758	213.563	347.542	285.688	291.39	305.517	365.94	419.973	290.275	420.956	150.407	266.086	336.15	336.304	259.133	550.599
PF3D7_0406400	cytosolic glyoxalase II	cGLO2	64.5609	50.9462	51.2761	65.2463	65.9747	63.3388	41.7978	51.8248	51.66	50.0523	70.1578	97.8838	68.715	78.0057	106.285	61.8568	80.7484	78.515	38.5539	44.4203	40.5745	43.7867	56.4159	48.0871	46.1436	46.1465	40.2807	53.1599	45.4548	65.404	43.5981	43.9121	44.1885	43.6539	32.1975	56.7889	39.8975	29.9841	65.7287	30.0143	40.0656	83.1194
PF3D7_0406500	NA	NA	76.4353	157.824	144.669	8.485	17.4662	14.5864	63.212	76.3569	83.6118	41.1862	28.1569	7.23622	94.9276	109.123	34.913	47.0281	177.678	136.008	143.024	11.0789	29.4468	23.8082	39.7734	65.214	29.5662	33.8954	24.4995	49.971	106.169	120.175	54.7233	59.3745	51.914	69.8178	13.7262	88.4506	3.95677	10.1864	5.83514	27.3974	28.8417	77.2583
PF3D7_0406600	NA	NA	0	0	0	0	0	0	1.2611	0.603252	1.33447	7.59415	3.22677	5.67148	5.65838	0.739178	4.82118	0.747719	5.07561	1.12164	0	0	0	0	0	0.515219	0	0	0	0	0.542498	0	0	0.678735	0	0.424323	2.0016	2.92057	2.48711	1.25647	0.684782	2.66346	0.629602	2.99775
PF3D7_0406700	NA	NA	0	0.171158	0.0802176	0	0.0744178	0	5.62141	5.47764	8.37188	5.82099	9.05627	8.42696	22.1398	13.6678	20.8084	6.29565	22.7445	19.5053	0.190518	0	0	0.174766	0	0	0	0.0505858	0	0.119493	0.626944	0.103359	0.841735	0.224111	0.859801	0.770587	2.86393	1.84832	2.361	2.69668	3.90035	3.07805	5.97676	7.84788
PF3D7_0406800	NA	NA	1.31001	1.01144	0.474039	0.266744	3.51812	4.94685	120.573	128.007	69.0016	72.237	69.8872	77.9671	82.5296	148.917	59.1308	47.0516	57.2996	68.94	1.40731	0	0.384772	0.516381	1.38756	0.251326	2.28203	1.49466	2.47017	1.76533	11.3792	11.605	34.5082	26.1561	30.2314	16.559	43.6122	40.3656	82.4994	72.0175	79.1675	55.8676	62.3459	114.687
PF3D7_0406900	NA	NA	0.321894	0.55229	0.388268	0.0873923	0.612333	0.540238	0.251932	0.433846	0.373224	0.563493	0.464125	0.4944	0.361723	0.649734	0.165109	1.61323	0.463526	0.388392	0.876034	0.692428	0.441215	0.465244	0.0909201	0.82341	0.560738	1.05283	1.38736	1.417	0.563554	0.850466	0.356488	0.867789	0.541007	0.576421	0.213261	0.466758	0.695597	0.451815	0.2736	0.744916	0.352174	1.19773
PF3D7_0407000	NA	NA	8.95173	7.03068	8.04231	13.7649	3.73042	7.18809	5.6532	4.16036	10.8138	10.6617	8.90144	17.0678	10.9265	4.33311	9.26236	9.7977	11.5014	7.60654	12.5348	25.8961	8.97581	14.0536	13.7321	11.7257	3.87158	5.07153	3.74176	4.74205	10.4758	10.5782	11.2079	13.5747	11.3138	12.5834	13.344	13.9315	9.21948	14.2978	4.60457	14.0061	5.10194	11.6661
PF3D7_0407100	NA	NA	0.562833	1.59337	1.42566	1.37525	0.944705	0.708456	5.28604	7.83867	6.71228	7.95794	9.73828	11.0219	11.6217	9.60489	8.94949	2.50732	9.11787	7.99254	3.14411	3.43035	0.991883	3.10601	3.09999	0.43192	1.17654	1.28433	0.60645	0.758458	3.18352	2.09935	3.73993	2.5605	2.61956	2.13432	10.6273	5.1008	10.1644	10.5333	4.01848	8.65225	5.93786	5.9237
PF3D7_0407200	peptidyl-tRNA hydrolase 2, putative	PTH2	47.1615	49.9084	52.6295	57.6182	69.749	68.0813	74.3384	70.6758	88.9878	77.5403	94.6293	106.374	54.2013	52.2871	50.7493	57.8499	41.1392	37.1913	56.9708	59.9473	65.6766	70.9806	62.04	69.8529	83.4189	91.4377	76.7574	86.1305	75.1503	76.1154	86.8759	82.5199	75.5973	82.2294	69.3187	85.3626	34.8196	56.0123	103.943	83.8989	52.6546	85.8303
PF3D7_0407300	NA	NA	26.5484	22.3063	22.0391	28.6189	29.8821	25.5544	39.0508	47.8843	57.328	51.8105	55.7297	50.82	20.2362	12.2506	14.1181	22.8276	17.7093	15.0018	43.5354	40.7318	23.2212	37.6274	32.9997	25.3918	23.8717	21.2479	23.6629	31.8827	50.8698	51.6059	60.0385	57.1321	65.4156	66.9929	50.3415	80.672	7.32188	35.6197	21.9514	31.3641	15.2399	50.0559
PF3D7_0407400	NA	NA	24.3348	18.3189	21.1338	15.6084	26.958	23.739	76.2781	99.2145	105.203	105.433	86.8409	62.3712	69.219	90.4237	55.2329	24.3916	81.8011	58.9497	10.1955	10.4693	8.041	11.5108	16.2385	9.10387	8.90212	14.5766	13.7658	13.2811	39.0809	28.9324	61.5039	42.4374	64.4166	49.0238	105.198	70.1315	123.39	50.381	68.4117	105.892	83.0096	68.6863
PF3D7_0407500	NA	NA	3.45382	5.07933	3.21376	6.22894	5.30026	5.79657	4.63396	6.42836	9.56192	14.5505	12.5683	15.9142	9.14846	2.71614	7.59241	6.31931	5.32873	5.63274	1.69616	5.3068	1.59413	3.11184	2.92662	1.89319	2.57851	4.72877	5.18347	3.45746	8.7711	6.44133	5.85459	4.73867	9.56839	10.2907	18.6326	10.9106	6.3973	12.4658	8.93272	15.4145	5.08969	10.2285
PF3D7_0407700	NA	NA	0.807303	1.06853	0.959855	0.469667	0.232293	0.290336	4.00766	4.61136	4.47005	4.70558	5.65378	3.23271	24.2512	23.427	19.403	5.90836	48.7632	35.8375	0.644254	0.620212	0.474238	0.590986	0.244313	0.663779	0.281263	0.289487	0.155333	0.372994	1.49104	1.12921	2.35376	1.45741	2.59438	1.02046	3.15181	3.67908	0.907873	2.64399	1.38217	3.66021	10.7882	4.52421
PF3D7_0407800	protein CINCH	CINCH	1.82139	1.99838	1.56099	0.663664	0.225265	0.24133	2.02573	2.15337	2.81048	2.40101	5.1602	4.04899	38.417	41.0035	38.9923	12.9183	84.2743	65.2623	1.02983	0.618631	0.703912	0.717956	0.284305	0.441391	0.267187	0.306249	0.103291	0.335872	0.232381	0.312869	0.682488	0.484563	0.408986	0.36352	1.09556	0.834023	1.02097	0.941875	1.46664	0.57045	14.2487	2.75163
PF3D7_0407900	NA	NA	3.377	4.92497	4.37883	3.09431	2.92858	3.18805	15.1974	19.7231	20.4165	21.1454	23.8047	19.9906	34.2722	29.4343	25.9824	9.24575	49.3884	42.0784	3.74875	4.1366	2.56237	2.32951	4.17307	3.67132	3.62767	3.59613	4.24515	3.6406	12.393	8.65984	15.8947	13.7982	17.4637	14.0509	15.9409	18.2608	10.6857	14.22	10.0462	21.7702	22.102	17.4121
PF3D7_0408000	NA	NA	2.18589	5.06308	3.55942	1.78036	2.20138	2.75144	7.69857	2.4551	2.17239	7.50584	5.25288	8.81297	8.75075	5.41491	11.212	3.65165	48.9856	38.3445	2.34824	5.09391	4.17321	5.16981	1.38917	5.03237	1.52312	1.7458	1.47205	2.06195	2.64941	3.05749	2.07498	0.552459	1.69561	3.10842	10.8614	3.16961	10.122	8.1817	6.40988	2.70991	13.3241	4.53148
PF3D7_0408100	NA	NA	5.8641	6.07991	6.24468	1.15993	2.98096	2.39014	5.82218	5.26905	7.90926	4.87325	7.73045	4.88936	15.8858	12.8203	11.0002	6.25099	17.2806	14.0888	13.8232	2.8232	5.7577	6.73642	5.60787	9.38599	2.91863	3.97617	3.24953	4.65107	4.33225	6.71812	1.74949	1.86319	2.53434	2.48846	2.16454	4.55526	1.93959	2.19491	1.58074	1.91095	5.65631	5.23671
PF3D7_0408200	NA	NA	0.603487	0.776574	0.218377	0	1.31682	0.506419	1.13357	0.948936	1.4994	1.82845	1.01516	0.811039	2.54309	1.99329	3.09546	1.17619	1.95529	2.94064	1.94493	0.10818	0.265882	0.594708	0.127843	0.694678	0.420508	0.413131	0.406409	0.975891	1.09719	0.703436	0.286433	0.762623	0.234065	0.381414	1.49933	0.656308	0.838353	0.423531	0.0769418	0.59853	1.27335	1.44354
PF3D7_0408300	zinc finger Ran-binding domain-containing protein 2, putative	ZRANB2	135.677	126.771	137.035	124.264	133.895	115.683	136.637	142.717	141.608	128.99	140.893	122.187	130.651	166.176	114.311	112.266	139.469	135.031	74.4577	46.8844	62.5768	48.3265	63.9476	87.6022	126.053	111.656	138.265	123.946	154.761	149.891	175.086	177.101	154.91	175.633	94.7619	147.75	64.5929	81.8347	118.239	85.6552	92.2321	137.114
PF3D7_0408400	NA	NA	0	0.102501	0	0	0	0.167107	5.04974	5.18899	7.91632	5.47036	12.2508	9.48159	6.20983	3.50796	7.35434	1.77425	5.16164	4.43587	0	0	0	0	0	0.305639	0.277518	0.0908829	0.107285	0.107341	1.6091	0.557085	2.07937	0.805279	2.62604	2.76889	5.73906	5.19762	2.58196	4.28586	4.16382	2.76503	3.54818	7.6214
PF3D7_0408500	flap endonuclease 1	FEN1	1.67595	1.72531	1.51615	1.47879	2.06291	1.52358	71.3561	71.6552	97.1602	96.9298	151.03	109.936	231.178	196.36	252.736	83.9934	260.04	231.306	0.960233	0.400573	0.902471	0.22021	0.710068	0.535889	1.1678	1.65723	0.75243	0.602259	7.56112	6.25127	18.8259	13.5545	25.7843	12.7108	58.5709	38.6806	77.2188	64.0373	131.553	65.3793	190.368	93.2732
PF3D7_0408600	sporozoite invasion-associated protein 1	SIAP1	0.127233	0.245587	0.0690604	0	0.128135	0.0800759	3.40561	2.74373	2.27604	2.08164	3.02694	4.17705	3.53864	5.46317	2.93676	2.01922	1.9581	2.17876	0	0.0684227	0.168167	0.150458	0.0808589	0.0732291	0.0664915	0	0	0	0.231319	0.355931	0.452913	0.38588	0.592171	0.0603099	1.13797	0.899397	1.0605	0.535756	1.99525	0.851765	1.29755	2.92166
PF3D7_0408700	perforin-like protein 1	PLP1	0.0743323	0.516519	0	0	0	0	0.942458	1.80332	0.332429	0.990933	1.17894	0.856257	0	0.245516	0	0.124176	0.120418	0.7451	0.0958239	0	0.065498	0	0.0944792	0	0	0	0.0600694	0	0.270284	0.207943	0.211682	0.45088	0.43245	0.211407	0.332413	0.404191	0.309783	0.834669	0.739207	0.663494	0.365961	2.41811
PF3D7_0408900	tRNA N6-adenosine threonylcarbamoyltransferase	KAE1	0.72233	0.697126	0.882163	0.220621	1.72769	1.13652	108.12	108.794	99.6042	88.8537	68.3481	40.3556	98.7363	114.072	66.4128	26.3964	98.0017	85.303	0.116397	0.291339	0	0.32032	0.114764	0.207869	0.94372	0.556297	0.948561	1.16807	15.1024	11.8716	33.2983	23.4134	38.4517	24.0531	39.436	62.4514	28.7237	35.9924	44.8956	47.0135	62.6789	94.3384
PF3D7_0409000	NA	NA	0.0488023	0.0188398	0.105957	0	0.0491482	0.0307145	0.825018	0.756414	0.982142	0.79845	0.809206	0.281084	3.51666	1.28953	1.83986	0.366872	4.74356	2.71093	0.125825	0.157468	0.0430022	0.0577108	0.0310148	0	0	0.167043	0.157752	0.0789175	0.118302	0.204785	0.833868	0.518037	0.65302	0.647721	0.800226	1.08801	0.169488	0.719244	0.149329	1.01643	0.686482	1.12065
PF3D7_0409100	U4/U6 small nuclear ribonucleoprotein PRP31, putative	PRPF31	64.0676	71.35	75.5263	50.0831	78.9123	70.1764	113.687	116.501	110.524	86.0197	106.224	88.103	120.381	135.014	106.877	83.3532	148.568	117.797	84.2523	81.3795	75.1335	76.0397	62.9724	75.3665	78.3482	77.615	76.2891	73.8668	86.313	83.2247	114.74	95.2005	98.941	100.045	97.9476	111.964	126.424	122.477	79.1147	135.737	106.762	115.427
PF3D7_0409200	protein SOF1, putative	SOF1	55.2672	53.5893	51.4057	41.2101	61.6691	49.807	112.402	104.214	67.1101	65.2499	79.1261	71.8835	68.2286	100.057	70.6707	76.9392	55.6951	59.2791	44.32	40.3262	36.8099	49.247	35.9479	40.1722	53.0191	49.1136	73.0747	59.3714	52.6774	54.8027	89.5934	75.5461	70.1939	63.956	54.343	56.4361	42.7135	63.37	52.3015	49.023	45.897	64.4237
PF3D7_0409300	NA	NA	7.43764	8.37448	5.31547	8.93528	12.3591	10.6883	11.2638	10.7762	15.2454	19.0042	16.5328	18.0635	9.40265	6.44862	9.82357	6.00542	7.83181	8.54268	8.06997	15.5325	8.24673	8.35556	8.0355	7.34863	6.60772	7.89198	6.71174	6.06377	12.0949	9.79647	12.7085	13.6284	17.164	17.1576	19.2175	13.8855	5.94103	13.7454	6.68526	13.6466	6.4953	14.5291
PF3D7_0409400	chaperone protein DnaJ	DnaJ	40.9678	47.0147	50.4372	26.8457	50.26	40.3164	136.941	125.491	109.097	114.759	70.4808	47.7284	51.2029	58.8926	33.3829	42.6189	37.1055	40.9102	36.7289	23.4335	30.9302	32.4809	24.2607	33.761	41.6516	34.7381	38.9006	38.6198	76.6269	61.8616	109.376	90.7871	105.846	98.6851	45.8019	109.764	10.865	32.4107	46.0829	40.8621	33.7908	88.9971
PF3D7_0409500	NA	NA	1.09933	0.121255	0.340975	0	1.10713	1.58145	71.241	83.6086	123.614	144.65	178.435	184.165	172.134	112.303	183.664	56.4069	159.519	145.223	0.202455	1.85805	0.553532	0.557147	0.798456	0.361557	0.820729	1.50515	2.15753	1.52376	9.32716	6.37041	17.4423	10.955	24.3037	13.1019	156.383	52.2628	258.093	171.939	187.654	219.385	278.019	115.252
PF3D7_0409600	replication protein A1, large subunit	RPA1	10.7171	8.90777	9.31924	5.74501	12.8305	10.3239	57.0796	56.4509	52.0861	57.3206	53.7683	61.0338	78.6643	76.6656	76.3143	27.7687	79.8102	67.1876	2.25562	2.3524	1.54178	2.32777	4.51744	3.58765	8.22963	6.81257	9.54444	8.17891	23.1958	17.8967	37.1377	30.2647	38.3642	32.3463	29.9134	47.0961	12.989	27.7828	27.2718	24.4034	28.6123	55.7696
PF3D7_0409700	peptide chain release factor 2	RF2	6.74823	10.9166	8.02341	7.85186	19.0937	19.8198	37.5743	35.5145	44.5506	37.776	44.4798	53.3039	61.7489	52.0078	74.172	21.473	61.9485	44.0221	2.89978	3.1106	2.26522	1.52001	9.39414	1.8495	16.7934	14.7389	16.8795	10.3928	21.0322	14.8327	26.0808	20.4665	29.1644	23.4575	53.6498	30.4039	61.1575	50.0657	52.3595	55.9326	54.0166	39.6625
PF3D7_0409800	NA	NA	31.7662	30.7418	31.4141	24.9869	39.1127	40.5328	24.9811	31.964	42.8141	35.7294	34.5085	23.8102	31.7695	24.0746	33.4804	18.5372	65.56	46.1639	37.5849	41.6547	22.3352	29.3315	22.1239	22.5408	21.3766	24.5762	21.1873	30.1703	48.3916	39.7155	46.7806	41.4075	52.658	57.1363	33.8929	52.1748	14.8104	23.3626	14.4803	22.8197	13.4665	40.1782
PF3D7_0409900	actin-like protein, putative	ALP5b	0	0.464082	0.163128	0.183587	0	0.189148	0.211695	0	0	0.182114	0.216666	0.519298	1.32979	1.24083	1.38739	0	4.86869	2.38495	0	0	0	0	0	0	0.314121	0	0	0	0	0	0	0	0.349694	0	0	0	0	0.632757	0.229903	0.447103	0.211377	0.431331
PF3D7_0410000	erythrocyte vesicle protein 1	EVP1	45.1558	58.3583	55.1374	33.9635	43.2815	43.0312	21.2754	21.6708	21.6171	18.2114	14.1916	12.5497	15.8625	16.1307	19.1922	23.095	65.4839	75.1886	33.3191	22.9503	28.3357	21.857	35.9075	40.3897	63.3738	61.5676	57.6818	65.9131	85.1475	71.2535	86.9773	99.1246	79.4679	113.682	24.864	64.3062	6.88877	22.9902	12.932	32.1914	18.0199	29.4743
PF3D7_0410300	protein phosphatase PPM1, putative	PPM1	14.8537	16.9092	17.0999	10.4663	13.5675	13.74	40.3913	38.2703	38.9305	34.2448	33.9683	25.3076	49.9585	54.3096	48.1586	30.5848	51.7075	46.5146	14.339	16.7191	13.3319	15.9312	10.7131	13.0424	16.9693	14.6142	14.181	15.0822	19.2596	18.3607	22.6257	22.4199	21.2222	22.1378	15.9628	28.7012	12.7646	13.3821	23.0953	19.7337	27.0652	35.9598
PF3D7_0410400	exosome complex component RRP4	RRP4	25.1388	23.1199	24.6815	20.7762	29.0401	28.3856	33.8525	32.8853	28.382	34.7225	31.1826	36.4106	35.2856	36.0213	32.1412	25.9386	25.4529	23.3152	20.2545	27.0381	22.6397	16.3939	14.5665	22.5541	30.7185	24.9282	25.6927	31.236	27.557	19.1326	28.1621	28.8713	28.1751	29.615	23.6965	24.7258	29.0163	46.4414	26.0177	31.3486	19.2409	32.1882
PF3D7_0410500	NA	NA	0	0.678232	0.317872	1.78868	2.35911	1.84287	1.65004	1.18395	2.61904	0.709734	0.422194	1.68651	1.11052	0.483575	0.901155	0	0	0.244595	1.5099	0	0.258013	0.346265	0.744355	1.34824	2.14233	0.801808	1.18314	2.60428	1.77453	1.22871	3.33547	1.77613	3.06635	4.16392	0	0.636884	0.813542	1.64399	0.895976	0.871224	1.44161	1.12065
PF3D7_0410600	armadillo-type repeat protein ATRP	ATRP	141.421	128.275	132.929	118.696	140.108	124.222	288.857	264.472	202.251	177.197	150.859	181.891	64.1975	107.283	49.8336	117.166	56.4992	66.9098	87.6965	89.2435	112.287	107.412	122.757	135.438	153.421	133.15	190.63	161.601	162.119	169.131	248.299	203.703	228.321	191.841	140.541	194.854	75.8684	128.568	161.248	118.878	78.4403	171.248
PF3D7_0410700	ribosome biogenesis GTPase A, putative	RbgA	1.52328	2.94026	4.28442	0.930511	1.53408	1.30732	18.9234	20.5306	17.5471	12.6709	18.7688	10.6878	49.106	56.2592	44.2163	16.8877	88.3886	62.0022	0.535555	0.521298	0.427076	0.573154	0.616046	0.956429	1.8816	0.900594	1.00718	0.671801	2.68552	3.19601	7.09848	3.35992	7.57309	4.59488	6.39923	10.0149	4.61696	6.60864	4.66106	8.44654	16.0705	17.8871
PF3D7_0410800	NA	NA	7.33229	9.53459	9.1642	1.23762	3.64355	2.06447	46.3471	45.5109	34.6612	22.8584	21.631	7.2238	80.9859	107.309	50.6242	24.2563	130.505	105.734	4.78832	1.14143	2.55034	1.19793	4.23062	3.83142	4.58812	5.94412	5.14572	5.49944	19.119	15.4514	30.909	22.0915	26.7172	23.0487	9.99518	32.8929	3.41763	9.00522	6.45772	15.2857	25.6833	42.3239
PF3D7_0410900	NA	NA	9.67482	8.01396	9.32034	7.12328	8.32383	8.87139	13.7199	16.5802	15.7598	14.1323	13.7649	11.2185	12.2309	9.84059	13.803	9.31209	11.0024	11.0788	7.68149	4.89278	4.74238	4.92489	5.70063	7.67034	9.37544	12.5006	15.8957	13.262	9.78494	11.1128	8.48448	8.06431	9.09525	9.0505	8.50033	15.3295	3.02624	6.56502	7.40097	5.90971	5.58788	13.3029
PF3D7_0411000	NA	NA	46.9866	43.7304	43.1703	45.8067	64.0302	58.4406	4.04579	5.59093	4.34062	5.124	6.90131	6.98391	7.46287	6.5872	8.04041	23.3882	6.00932	5.63082	21.8532	29.4296	29.312	26.697	36.046	37.328	80.9193	83.9913	72.2993	76.1427	57.7237	58.4134	22.4338	36.2914	19.8637	40.6497	27.9452	26.0267	7.03706	18.1393	6.43808	11.8677	6.87312	14.3113
PF3D7_0411100	mediator of RNA polymerase II transcription subunit 8, putative	MED8	0	0	1.65108	0.371629	1.83805	0.765774	8.9991	6.96961	14.9642	10.3221	18.4208	15.768	17.3048	4.01883	10.2977	1.01632	15.7689	11.9424	0	2.29017	0	0	1.15989	0	0.317933	0	0.983273	0.491893	2.94951	1.27643	8.66252	5.53531	6.72481	4.32563	14.0566	8.93184	8.45136	15.3705	6.98079	13.1233	7.27404	14.2611
PF3D7_0411200	NA	NA	1.76017	2.21324	3.54863	0.368647	1.97524	2.02568	10.4147	14.0985	10.9456	10.8488	7.32368	3.76554	9.02798	9.13591	5.80399	2.94047	11.8132	9.28401	0.0648311	0.10818	0.0886274	0.118942	0.639213	1.33147	1.47178	1.58367	1.74756	1.8298	8.7775	6.96401	14.1784	12.0494	16.6771	17.5927	8.62114	18.7595	3.0041	8.11767	3.34697	12.2699	9.19643	20.6426
PF3D7_0411300	NA	NA	0.520017	0.736081	0.940865	0.105886	1.74568	0.872749	9.88994	8.64411	8.01048	7.24753	7.62286	10.3831	18.6265	20.468	15.4705	5.21232	17.2697	16.217	0	0	0.0763691	0	0.991444	0.199532	0.724693	0.237326	1.26071	0.840913	3.46659	2.30334	8.02151	4.73143	8.57184	4.9299	6.58896	9.14277	2.76919	3.89281	4.57468	3.48128	8.22923	11.4437
PF3D7_0411400	NA	NA	5.18583	5.11611	5.62962	2.99183	4.69066	3.56598	12.9202	12.8139	16.2488	14.2572	9.48498	8.96058	7.34506	5.94741	5.24603	4.65247	6.76748	6.89889	4.333	4.69967	5.28878	4.59935	4.21117	3.70326	2.05767	2.95839	2.44462	3.64943	6.3437	5.37306	6.35849	7.28145	9.16277	6.50954	8.94714	12.115	5.60316	10.5139	4.04048	12.9295	5.57234	13.6449
PF3D7_0411800	NA	NA	0.22739	0.200645	0.105792	0.0396867	0.294431	0	7.32208	7.00511	7.99019	7.8343	8.99281	5.38842	20.2047	12.7143	16.2955	4.34135	19.6815	18.2347	0.0837528	0.0349385	0	0.153656	0.123866	0.0373928	0.169762	0.222378	0.157507	0.183854	1.2993	1.2268	2.86775	1.08372	2.8348	1.53979	3.92227	4.55724	3.79063	4.28595	3.32984	4.92926	7.08261	8.79588
PF3D7_0411900	NA	NA	0.72063	1.51743	1.03121	0.520242	0.890679	1.03077	56.1594	60.4387	58.5965	56.4897	51.5744	31.5444	104.022	92.2872	76.2618	30.5889	108.676	93.906	1.18235	0.915999	0.894752	0.581029	0.541243	1.01805	0.7532	0.560595	0.926476	0.97993	8.57561	5.3606	15.6247	9.88476	19.5903	10.7134	19.4336	30.1014	8.78226	14.4826	21.6496	18.8099	43.5883	48.4842
PF3D7_0412000	NA	NA	3.298	4.34742	4.27882	1.37584	3.32138	3.13879	79.0979	78.7093	64.0338	51.4725	67.5013	49.2027	122.944	164.327	93.8242	51.7356	142.951	132.505	0.414786	0.692132	0.283517	0.285368	1.7381	2.50004	3.86743	2.36785	3.90027	3.64216	18.0368	13.1641	35.2772	23.9082	35.3792	23.7926	25.7802	47.5014	10.951	15.6938	23.6289	21.5401	42.7709	66.4969
PF3D7_0412100	ribosomal protein S12, mitochondrial	mtRPS12	3.34694	3.58906	2.62409	2.49885	7.67762	7.02149	68.6307	70.1706	49.0624	47.3226	45.3089	37.6976	59.2367	76.1551	56.3663	33.2369	53.919	58.7115	2.15732	2.19988	3.60453	5.71696	4.72676	4.28075	3.4982	3.30954	3.30578	5.26195	12.17	9.363	33.3597	23.4033	32.6694	16.57	23.0056	43.6786	41.3289	26.8818	34.2797	27.3854	41.5873	64.0469
PF3D7_0412200	NA	NA	2.25809	1.30758	2.04278	1.14948	3.03213	2.60547	3.18115	2.5362	6.1714	9.80626	8.1396	12.1388	8.32615	2.17536	8.97637	5.0297	8.84041	6.60186	3.39614	8.29805	4.8085	4.22796	1.91342	0.866435	0.196679	0.515276	0.304135	0.912883	4.33347	4.73773	2.6794	4.56566	5.69276	3.0327	16.5498	4.50218	6.53521	14.2627	2.15922	5.8788	4.8969	4.86121
PF3D7_0412300	NA	NA	0.694959	0.44714	1.00591	0.707538	0.116647	0.291589	2.4476	2.65386	2.24466	3.79006	4.84314	2.93533	7.90709	5.35597	8.73337	1.54796	9.38191	5.61167	1.04521	0.996619	1.02061	0.410909	1.03054	0.133328	0.121061	0.555041	0	0.187301	1.1231	1.78212	1.64924	2.28336	2.29111	0.988258	4.48912	2.64525	2.25265	1.3006	0.708831	1.72312	1.1405	3.76797
PF3D7_0412400	erythrocyte membrane protein 1, PfEMP1	VAR	0.482016	1.24782	0.984971	0.311765	0.0856646	0.285519	0.399443	0.420366	0.380413	0.412352	0.204411	0.391941	0.179225	0.374606	0.0436306	0.1421	0.367465	0.686858	0.584829	0.426945	0.224857	0.301767	0.360389	0.130553	0.325989	0.310564	0.160394	0.229253	0.37803	0.436257	0.524847	0.558958	0.659829	0.510724	0.0422661	0.77089	0.31511	0.278585	0.0650698	0.59054	0.259248	0.51545
PF3D7_0412700	erythrocyte membrane protein 1, PfEMP1	VAR	0.55015	0.615907	0.686815	0.168033	0.22162	0.553993	0.465023	0.370743	0.656102	0.666738	0.198309	0.221807	1.35622	1.27198	0.550266	0.275717	1.38142	1.63142	0.283686	0.325443	0.387813	0.292759	0.489484	0.348304	0.345009	0.376617	0.155606	0.378097	0.200043	0.500186	0.548347	0.291993	0.320066	0.417245	0.0820089	0.568387	0.114639	0.424708	0.16834	0.368301	0.174122	0.500063
PF3D7_0412900	erythrocyte membrane protein 1, PfEMP1	VAR	0.0541825	0.0418336	0.088229	0	0.0272833	0.0341006	0	0.0365133	0	0	0	0.0312073	0.0342487	0.134222	0.125063	0	0.0438877	0.0905202	0	0.0291381	0.0477431	0.0320366	0.0688681	0	0	0	0.021893	0.0657134	0	0	0.038575	0	0	0.0256832	0	0.0883873	0	0	0	0	0.114325	0.0259209
PF3D7_0413200	rifin	RIF	0.831062	0.12833	0.902182	0.609196	1.17173	1.2553	3.51234	2.91225	1.23889	4.23016	3.35516	7.27568	0	0.274496	0	0	0.80779	0.416525	0	0	0	0	0.422525	0.191328	0.521174	1.13784	1.74616	0.67195	3.42479	2.09239	9.46673	13.6107	13.3445	6.77567	2.47767	6.50737	1.61629	3.49947	2.03437	4.94541	0.818315	2.86257
PF3D7_0413300	rifin	RIF	0	0.697126	0.784145	0.220621	2.00049	1.36383	2.544	1.70371	2.69201	2.62622	1.82261	2.49622	0.456584	0	0	0.301673	0	1.05592	0.232794	0	0	0	0.459055	0	1.6987	0.123622	1.75119	0	3.93976	1.26294	7.45675	3.83378	6.51367	3.59513	4.307	5.69525	2.00689	2.28121	0.966983	1.61189	0.635045	1.03669
PF3D7_0413500	phosphoglucomutase-2	PGM2	0.423393	0.490344	0.689438	0.517268	0.213197	0.266469	28.9286	27.6762	35.6609	51.5684	80.8873	110.468	160.308	117.819	245.294	50.2184	161.185	145.889	0	0.910762	0.373073	0.75102	0.269074	0	0.663792	0	0	0.684662	2.56587	0.296108	7.83724	2.56819	6.65067	4.81664	32.1879	9.43923	29.7025	23.1769	50.8497	19.2111	64.3215	31.8004
PF3D7_0413600	26S protease regulatory subunit 6B, putative	RPT3	154.662	148.466	154.397	148.241	205.537	163.369	401.851	363.824	272.156	299.708	364.847	433.829	579.113	735.981	686.251	428.845	544.24	548.739	114.489	133.078	115.066	149.521	138.823	119.667	134.155	133.711	153.848	139.748	158.47	156.116	221.811	204.553	199.995	178.972	218.428	204.96	176.756	244.837	412.873	181.698	347.194	384.139
PF3D7_0413700	NA	NA	5.54532	5.70862	4.01325	7.45232	12.8446	15.3561	153.899	153.714	219.892	251.122	395.779	518.479	390.478	253.37	472.447	120.738	308.43	296.303	1.19144	1.39167	0.977254	1.74869	1.17472	2.12775	3.67076	3.41655	6.72193	3.288	35.3984	20.4254	60.7986	48.4925	88.6117	46.0873	317.422	118.804	334.33	312.896	382.064	302.212	403.669	217.359
PF3D7_0413800	NA	NA	0	0.344346	0	0	1.34746	0.561386	1.25661	2.40442	2.99186	5.40509	6.43058	8.73382	11.8403	2.94619	19.9024	2.23517	5.05755	7.82356	0.287472	0	0	0.263703	0	0	0	0	0	0	0.270284	0.311915	3.17523	0.676319	1.55682	0.845627	1.32965	1.21257	3.09783	1.878	2.04703	8.29368	3.29365	3.20044
PF3D7_0413900	ubiquitin carboxyl-terminal hydrolase 13, putative	USP13	23.4799	26.1164	26.1265	14.4326	15.7396	13.115	40.5205	42.0299	42.4404	35.9255	37.7691	44.2054	68.4571	73.3119	64.3577	31.7474	69.8937	66.8695	20.053	17.5988	13.1895	12.755	12.0308	13.5984	8.89616	10.5986	10.3768	13.3485	20.6327	17.9607	27.4776	24.924	26.6373	26.3637	23.2973	31.3602	13.0472	22.7607	19.3086	24.1239	25.0809	41.3507
PF3D7_0414000	structural maintenance of chromosomes protein 3	SMC3	1.15458	1.53975	1.08247	0.256468	1.16276	0.792711	45.6171	46.8253	39.6651	29.6388	24.6683	11.7281	60.7068	67.5166	30.6876	13.5892	59.0029	49.6253	0.7442	0.846688	0.231218	0.186182	1.00058	0.60411	0.822791	0.502977	0.975449	0.721361	6.42456	6.60664	18.1586	11.2213	21.8001	13.0851	13.2211	31.505	3.42655	10.2391	4.53654	12.4138	13.0297	40.7734
PF3D7_0414100	NA	NA	0.210842	0.325576	0.503546	0.463661	0.29727	0.424628	3.62375	4.71722	6.72621	6.18366	7.41767	7.5777	4.42466	3.20344	2.85507	1.12711	3.48393	3.66333	0.163081	0	0	0.0997316	0.321585	0.436862	0	0.230938	0.136308	0.477329	2.14663	2.06439	3.72267	3.96462	4.02336	4.7972	5.15442	6.23684	1.17159	4.02478	1.77417	5.39502	1.74984	6.85891
PF3D7_0414200	NA	NA	0	0.317597	0	0	0.414264	0	14.4875	8.87058	20.8492	20.9379	54.5656	68.7076	102.445	32.608	113.936	24.7385	70.6365	63.2243	0.530282	0.884854	0	0.486437	0	0	0	0	0	0	1.49573	0.57537	0.585715	0	2.87177	3.11975	23.3009	7.60499	30.8576	14.4343	19.5095	9.79126	27.4848	22.8275
PF3D7_0414300	NA	NA	56.5622	41.5302	50.5669	66.3934	51.3786	55.8405	57.8096	82.9605	100.026	89.3825	94.3474	115.62	95.3412	76.0111	130.556	35.2024	99.7156	88.4741	37.8878	75.1499	34.6925	44.5915	45.1092	17.8731	28.9797	40.9986	51.9829	30.4887	69.9007	66.7056	67.1153	57.1819	74.8468	76.7537	143.832	80.8111	217.237	102.742	56.843	114.67	81.1239	58.3633
PF3D7_0414400	NA	NA	0.378623	1.46165	0.822049	0.693858	1.52523	0.238292	0.533395	0.255152	0.564426	0	0	0.436148	0	0	0.58262	0.316256	0.306684	0.158137	0	0	0.333624	0.447738	0.240622	0.435835	1.97868	2.46235	1.83584	2.44906	0.917822	2.64798	1.07823	2.00955	1.54193	1.79472	0.8466	1.02941	0.788964	0	0.289636	1.12654	0	0.181133
PF3D7_0414500	NA	NA	1.37719	1.46205	1.68193	1.47222	0.693476	1.51682	1.45511	1.85616	5.64582	1.46041	0.496426	1.58643	1.95867	0.284299	0.5298	1.15034	1.11552	1.7256	0.665766	0.37031	0.455067	0.814292	0.656423	2.97242	0.179929	0.235696	0.139117	0.278379	0.62596	1.92633	1.47072	0.783156	0.801221	0.326403	0.769847	2.43381	0	0.24163	1.58027	0	0	2.96481
PF3D7_0414600	acylated pleckstrin-homology domain-containing protein, putative	APH	1.06207	1.84502	0.864719	0.973165	1.8718	2.00529	33.2909	32.5654	36.0193	41.8322	81.9272	80.4406	122.183	112.693	149.947	49.679	157	136.403	1.71143	3.42693	1.16981	1.25594	0.674966	1.83383	1.66511	0.727063	3.43312	3.00555	3.21821	2.59973	8.69555	6.84487	11.7399	7.2998	34.0386	16.1704	32.459	18.2615	69.2616	15.8002	76.9395	38.8691
PF3D7_0414700	NA	NA	0.594893	1.30138	0.86107	0.969059	1.99703	2.12163	14.5266	12.695	15.9629	17.0628	16.1543	12.4492	38.8566	27.5087	30.6664	6.95663	50.7561	32.1348	0.383447	0	0	0.586239	1.1342	1.02718	0.93267	0.814495	1.84286	0.881828	5.04729	3.46709	11.4353	6.31481	11.5366	10.0575	16.4055	15.7427	12.8094	10.1592	7.58461	9.4401	14.9232	16.6963
PF3D7_0414800	NA	NA	1.25324	1.69332	2.04074	0.765556	1.57766	0.788747	2.64831	0.844553	2.33531	2.27824	4.96923	0.360912	5.54521	5.17425	4.82118	1.04681	14.7193	14.6561	0.807796	1.34793	0.276074	1.11151	0.39823	0	0	0	0	0	0.379749	0	0.44612	0.475114	0.729111	1.18811	2.3352	0.340733	0	1.3193	2.39674	0.466105	1.98325	0.899325
PF3D7_0414900	armadillo-domain containing rhoptry protein	ARO	9.98961	11.7446	8.6263	13.314	10.0604	9.43067	3.51828	4.28396	4.73832	4.40241	1.63677	4.18449	29.276	35.6198	74.0645	29.5837	236.862	246.924	11.1218	18.3142	11.8032	11.5447	6.06002	6.79492	4.74595	2.33134	1.46778	2.20283	1.3759	2.54052	0.969825	1.03286	2.64171	0.860946	0.338435	2.71599	0.315395	1.27468	6.42603	1.01327	21.078	1.30337
PF3D7_0415000	ATPase GET3	GET3	18.3039	16.042	15.395	18.9374	21.2568	24.0775	7.20154	9.55679	14.9952	14.3889	20.6853	28.3031	23.9737	20.9693	29.4346	21.2116	11.7541	16.254	25.5093	35.4718	21.2141	16.1851	11.1085	26.5745	26.37	18.0618	23.1871	26.6658	12.5917	14.9924	7.51359	9.00217	8.63421	11.0994	4.67041	11.1187	3.20707	4.86057	14.002	3.18914	3.82732	8.83547
PF3D7_0415100	NA	NA	9.68689	9.11518	9.3657	11.2799	11.2799	14.6699	5.1175	6.52795	9.70227	11.1894	15.2765	13.5996	15.499	7.99884	15.6048	5.05704	10.5435	11.6318	13.2681	24.0934	12.5367	14.14	10.9658	10.8022	1.89838	4.97353	3.1802	4.28327	7.15469	9.52696	3.8793	2.98381	3.69839	5.59615	11.5068	8.06566	5.88737	12.3219	4.86294	13.5103	5.53563	8.54431
PF3D7_0415200	NA	NA	0.141577	0.0874479	0.0922158	0.0345936	0.256645	0.142566	5.58462	6.86939	8.5688	7.10343	7.71626	3.97933	17.576	12.4388	13.3329	4.44645	17.4768	15.3033	0.146009	0.0609095	0.0748507	0.0669685	0.10797	0.0325941	0.147976	0.135688	0.29747	0.16026	0.789356	0.633696	1.37081	1.20228	2.0427	1.04691	3.20787	4.55748	1.45541	2.74233	2.18771	4.63367	5.07835	8.6695
PF3D7_0415300	cdc2-related protein kinase 3	CRK3	115.738	136.152	134.678	71.6424	104.314	104.892	197.371	208.302	245.313	216.547	192.499	125.188	154.888	154.841	124.559	114.914	166.435	151.6	170.059	93.9022	108.658	107.003	100.211	122.945	107.479	112.332	106.341	129.082	174.571	181.445	208.211	204.157	218.026	208.007	181.519	234.953	134.861	169.277	126.312	220.043	166.816	215.927
PF3D7_0415400	NA	NA	34.1793	24.306	26.0381	24.9081	27.4769	39.6261	46.4615	56.5729	56.3157	71.9446	72.1932	83.2343	109.161	81.2035	136.562	63.1089	113.169	102.433	46.3806	66.4289	46.4967	44.6731	38.8703	44.866	25.6963	30.1714	35.132	31.2717	42.8807	55.3567	40.9832	39.555	43.2583	48.0358	86.7042	45.6485	124.534	69.0159	54.8153	69.1352	83.7159	55.0783
PF3D7_0415500	nuclear cap-binding protein subunit 2, putative	CBP20	85.0605	90.5849	87.1293	61.5703	64.7175	57.3939	159.65	159.567	148.665	146.389	141.099	169.552	145.288	155.888	126.376	92.2081	146.869	130.079	104.154	83.4568	53.3352	75.0466	75.9179	69.3682	77.1995	79.4046	86.1933	97.6649	118.611	123.453	131.368	126.562	128.448	124.119	59.2247	142.383	25.9295	44.538	83.0189	50.379	51.5738	118.634
PF3D7_0415600	GTP:AMP phosphotransferase	GAK	7.35599	6.52086	4.14062	6.32416	11.7981	17.4896	58.3395	63.5251	58.8905	66.3663	76.9936	61.512	30.3092	31.0455	36.4733	13.1989	27.8055	32.7715	0.351215	1.17211	0.240065	0.644353	7.27202	1.56806	8.54272	7.83331	14.9714	6.3882	19.813	22.1026	38.793	46.272	45.9657	41.0671	94.2204	49.4804	88.5629	97.131	69.1927	104.57	59.2099	52.6561
PF3D7_0415700	NA	NA	0	0.10472	0.147239	0.165705	0.409781	0.170725	1.14645	1.64523	2.62849	3.61626	7.04023	7.96819	7.03011	4.25587	8.55707	3.17214	8.34949	6.23135	0	0.14588	0.478051	0	0	0.156127	0.141762	0	0	0	0.328787	0.189714	0.772502	0.617032	0.789081	1.28583	4.85237	1.47504	9.42089	5.71125	4.3577	6.65864	6.10523	4.41227
PF3D7_0415800	NA	NA	0.286128	0.165687	0.0776536	0	0.360196	0	2.62009	2.21743	2.98579	3.29427	3.81614	5.6032	5.78757	4.84347	5.6137	1.55348	10.0817	8.18611	0.276642	0.230809	0.189092	0.169179	0.0909201	0.082341	0.074765	0.0489689	0.0578066	0.231347	0.346803	0.400219	1.3241	0.433894	1.24848	0.678142	1.38619	1.40027	0.695597	1.00403	0.8208	0.851333	1.86149	2.66923
PF3D7_0415900	NA	NA	5134.34	5148.3	5086.98	5697.08	6017.77	6599.82	4671.82	4810.26	5651.46	5970.99	6234.12	5934.38	5440.62	4549.32	5607.55	5619.22	4596.63	4939.33	6269.83	6653.26	7250.03	6921.93	5914.29	6646.53	6406.98	6939.9	6145.7	6067.5	6079.67	5863.49	6175.94	6736.48	6581.47	6994.25	7776	6075.97	8125.56	7148.97	7007.55	7849.12	7631.75	5178.25
PF3D7_0416000	NA	NA	106.742	112.944	110.599	55.9648	87.9136	86.6262	173.966	199.635	244	190.508	186.619	126.693	356.478	296.181	246.711	123.09	388.547	411.888	104.596	47.5261	77.872	59.536	71.2694	105.957	118.228	104.135	113.064	136.271	136.971	137.063	134.451	142.862	158.896	138.885	125.135	188.931	123.82	92.1992	160.499	161.369	215.194	173.353
PF3D7_0416100	glutamyl-tRNA(Gln) amidotransferase subunit A	GATA	5.22816	5.85013	3.53695	3.61024	9.99628	7.62996	30.5286	33.4962	30.0456	26.9055	33.9767	33.08	62.0711	66.4456	55.8487	23.1639	56.8321	68.8628	2.34427	0.81495	0.600887	0.896017	1.05938	1.13386	4.5933	3.63092	7.34779	4.65604	8.26539	5.93506	12.4072	9.19206	12.8719	8.83537	8.58406	17.8813	2.63147	9.14628	11.6504	8.00325	18.7053	32.9136
PF3D7_0416200	NA	NA	84.6541	106.53	99.7475	37.1737	52.4874	46.6423	80.2131	91.3579	79.0414	77.767	80.7934	34.7031	130.632	117.416	91.3243	83.5432	151.292	141.176	158.064	50.8713	108.306	69.4693	70.839	97.4458	60.1413	61.2516	69.8715	97.1891	111.734	117.566	85.3633	91.825	95.3453	90.5359	54.3384	103.203	5.85907	25.3711	32.2638	71.2603	72.6766	81.8616
PF3D7_0416300	DNA helicase MCM9, putative	MCM9	0.555667	0.297016	0.603219	0.469987	0.774838	0.699435	16.6799	15.4393	13.4448	13.0023	9.61428	4.67758	19.1829	21.0358	13.8124	4.78418	14.5413	14.6747	0.220408	0.275838	0.188318	0.353823	0.162986	0.147607	0.357403	0.526699	0.898091	0.691201	2.17591	1.43489	5.41673	2.46308	6.51525	4.29533	5.54332	8.46022	3.62209	4.55965	5.03544	4.64197	6.34326	12.9643
PF3D7_0416400	histone acetyltransferase, putative	HAT1	34.5139	36.8998	32.4466	28.1312	41.7703	37.8724	164.433	184.394	182.377	145.856	198.124	116.981	374.648	346.921	384.7	154.362	418.053	359.881	21.7335	15.6723	22.9624	22.7595	29.8988	30.2262	34.6703	35.4068	36.0096	34.0582	56.1184	58.0147	98.8544	79.2611	96.5783	73.5965	107.642	108.548	86.8418	99.1219	140.723	100.25	182.165	190.809
PF3D7_0416500	repressor of RNA polymerase III transcription MAF1	MAF1	0.160672	0.372158	0.348844	0.196297	0.485433	0	1.58446	3.68139	4.79039	5.84165	12.7416	8.88399	27.4214	16.4515	38.8167	9.93124	41.3858	25.5006	0.207127	0.345622	0.141577	0	0	0	0	0	0.129842	0	0.584229	0	0.915117	0.487297	0.373903	0.456964	4.07164	1.57261	2.23203	3.60834	4.42474	1.43417	9.49246	7.84027
PF3D7_0416600	prohibitin-like protein PHBL, putative	PHBL	0.65273	1.00793	0	0	0	1.36935	14.0998	14.6624	25.2992	21.8859	17.568	14.2861	42.6343	19.7628	25.7799	4.3617	48.6413	25.9899	0	0.46803	0	0	0	0	0	0	0	0.17592	1.846	1.52167	4.64708	3.62935	5.06327	2.88776	13.9464	12.0676	10.5789	10.3834	4.9932	16.1842	15.7619	19.7768
PF3D7_0416700	NA	NA	39.686	44.0801	40.8147	28.921	61.0027	47.3248	186.362	122.929	88.223	77.6291	94.3652	89.827	113.545	332.302	184.276	131.432	109.408	109.339	15.2584	26.9585	12.8835	26.3469	27.4336	15.2276	26.9254	14.2989	33.1964	19.7031	27.0044	30.1899	54.5257	29.5627	37.2657	34.9831	80.9537	37.1021	101.557	88.9305	86.8151	73.541	112.629	59.2888
PF3D7_0416800	small GTP-binding protein sar1	SAR1	738.958	654.266	689.409	855.995	1054.82	1030.28	745.551	739.969	890.566	1027.77	1470.87	1721.16	2032.97	1552.27	2379.61	1203.01	1826.69	1739.26	575.502	787.106	660.003	658.843	742.4	686.55	978.34	1070.64	1062.1	1036.4	965.31	891.467	888.079	1032.94	912.333	1078.84	1448.07	892.262	1706.25	1393.12	1462.63	1398.31	2271.88	985.995
PF3D7_0416900	NA	NA	5.99984	5.63076	5.24993	3.25433	5.1308	5.17585	12.9701	12.8617	20.5485	18.4604	16.295	11.8268	22.0357	13.8379	17.669	9.11582	17.9312	16.9581	8.50136	6.73129	6.81355	5.68828	4.66766	6.3706	5.43307	5.94853	4.03353	6.29392	11.441	10.852	10.7525	10.5886	13.6313	12.2096	13.0687	13.8093	7.29301	11.9425	9.00136	17.1206	12.6596	16.826
PF3D7_0417000	NA	NA	0.227037	0.87646	0	0	0.457292	0	0.959531	1.22399	0.676903	0.550301	0	0.261531	2.29615	0.749891	0	1.13783	0.367798	0.948248	0.29268	0	0	0	0	0	0	0.466269	0	0	0	0.317565	0	0.344286	1.58502	0.430473	0.338435	0	0.315395	0.956013	0.52103	0.337757	0.319363	0
PF3D7_0417200	bifunctional dihydrofolate reductase-thymidylate synthase	DHFR-TS	0	0.317771	0.223398	0.125707	0.725359	0.906606	36.3834	32.8668	32.0578	44.1433	44.6556	65.1894	47.8686	43.8409	73.6239	16.8452	43.3386	38.2476	0	0.110667	0.0906648	0.243352	0.261563	0.118441	0.215088	0.281752	0.748353	0.249581	3.86608	3.88587	14.5044	7.02139	14.7259	7.41347	42.026	16.673	47.3124	50.5478	34.0817	41.3295	47.7629	39.2808
PF3D7_0417300	NA	NA	25.9857	30.8479	28.9718	12.2031	24.5981	18.2699	50.3497	52.9029	45.6012	31.398	27.5662	20.1356	36.5998	53.3534	26.8977	21.7705	32.8682	30.4413	21.9302	10.4913	12.1019	9.68937	13.6876	17.1569	22.5111	19.0711	26.2337	27.8878	39.1572	34.6008	53.1121	37.6305	42.6752	42.686	18.1465	40.3958	6.28748	13.5818	7.76029	17.9941	13.6113	35.6893
PF3D7_0417400	NA	NA	29.6002	34.7383	30.9778	9.30654	20.1437	16.206	22.167	21.4444	25.9955	22.7824	22.7809	13.0717	43.0137	31.3971	36.4615	25.2192	53.3802	39.9959	33.2067	12.5833	19.2803	18.4431	22.5644	29.1719	21.5154	21.7588	20.4424	25.5795	34.4859	35.7842	25.8051	28.1279	24.835	28.7988	27.6361	30.8119	8.57632	24.8919	6.92469	28.9026	22.993	28.7377
PF3D7_0417500	NA	NA	10.5492	10.9141	8.93252	11.8571	24.4351	26.8227	272.261	272.418	267.657	267.202	286.259	308.659	496.109	490.595	487.312	192.796	469.964	509.51	1.9039	0.226924	0.557726	1.99598	7.77688	5.34301	11.026	10.9769	20.46	13.1354	64.1865	59.3174	152.011	129.577	159.815	112.01	202.227	183.56	287.526	236.911	308.59	255.495	404.365	251.528
PF3D7_0417600	NA	NA	0.232656	0.239508	0.0841888	0.0947471	0.0781018	0.0976172	0.983282	1.56786	1.38732	0.657909	1.45364	0.268004	0.78433	1.15268	2.02871	1.166	2.51268	1.48997	0.399899	0	0	0	0.197144	0	0.324229	0	0	0	0.0939972	0	0	0.117603	0.180473	0.147043	0.231208	1.01208	0	0.326559	0.415276	1.38447	0.599992	2.15185
PF3D7_0417700	NA	NA	0	0	0.132343	0	0.24555	0.153453	0.68698	0.16431	1.09042	0.443238	0	0.280865	0.770597	0.603998	0.750378	0.610977	3.5549	1.32386	0.157159	0.131121	0	0	0	0	0	0	0	0	0.147762	0.341043	0	0	0	0	0.181728	0.132581	0.677424	0.171115	0.466291	0.362728	0.171487	0.349932
PF3D7_0417800	cdc2-related protein kinase 1	CRK1	11.6372	13.201	13.5077	5.35889	9.19549	7.54944	50.8223	50.0699	40.3009	38.0792	31.2352	22.1703	56.8101	77.6137	49.176	24.0766	60.7623	52.3433	4.26978	2.40701	3.39177	2.64645	5.00632	7.31611	7.57861	8.70191	12.0086	9.84349	24.3039	18.1557	36.1994	33.9367	36.0389	36.1524	24.1527	38.5515	20.6431	33.6735	15.8869	40.7509	33.4318	48.3922
PF3D7_0417900	NA	NA	0.66485	0.769983	1.44349	0.203065	2.34347	0.941475	1.87325	2.01617	1.115	2.2158	1.07844	1.53172	0.735439	0.823488	0.895179	0.833003	0.80779	0.763629	0.214269	0.0893851	0.0732292	0.491383	0.739419	1.0523	0.608036	1.4223	0.873078	1.54548	1.81312	2.32488	3.90503	2.26845	3.67456	3.23026	1.85825	2.7114	0.346349	1.51643	0.508591	2.96725	0.876766	2.06741
PF3D7_0418000	NA	NA	0.0512364	0.108787	0.0973368	0.0156492	0.0515996	0.0161232	2.00301	1.95083	2.13864	2.04912	1.05272	0.354125	1.87842	1.58654	1.00523	0.556357	2.61458	2.48235	0.0825629	0.0137769	0.0112868	0.0151473	0.0814043	0.0442339	0.040164	0.0263062	0.0207026	0.0828537	0.310506	0.286666	0.747788	0.602148	1.088	0.400731	0.420069	1.54625	0.480442	0.503412	0.352749	0.990902	0.693694	2.53693
PF3D7_0418100	protein SOC1, putative	SOC1	34.8867	34.4155	32.334	34.5634	33.8885	28.0861	20.8351	21.0444	25.2736	23.2946	26.0795	20.9543	24.0388	18.7226	25.1367	29.6997	22.7902	17.4334	36.6697	51.2124	33.8282	39.1831	38.4475	38.0228	35.9787	38.981	35.0639	34.9155	38.2247	35.8953	29.2766	29.0695	25.303	35.9558	31.8018	29.9262	13.9593	27.4131	16.0045	19.2422	12.4678	26.181
PF3D7_0418200	eukaryotic translation initiation factor 3 subunit M, putative	EIF3M	139.897	189.472	171.643	103.973	138.394	142.708	245.122	255.134	262.424	263.323	226.294	252.471	224.019	233.924	185.223	156.778	220.966	204.139	195.186	178.365	131.103	142.342	126.507	121.112	114.539	131.483	134.133	137.62	207.007	208.929	252.317	222.088	257.054	227.536	203.108	262.127	148.996	186.747	134.886	171.917	179.158	245.537
PF3D7_0418300	NA	NA	863.45	980.62	824.035	668.416	840.464	720.437	591.268	608.708	681.451	650.435	657.105	496.99	878.331	760.14	851.79	955.831	1081.26	937.594	1117.41	966.693	946.715	925.773	1138.62	1253.82	1132.2	1045.03	979.777	1071.11	1125.56	1186.21	939.142	1081.23	892.702	1141.2	676.903	907.112	127.637	426.923	420.986	470.799	564.238	819.807
PF3D7_0418400	NA	NA	26.2041	13.6345	18.5521	16.703	29.8321	23.6624	20.0629	13.82	9.34126	18.6402	18.0699	22.3109	23.045	15.9931	32.4334	10.4681	28.608	11.8962	6.60924	7.35233	3.51367	7.41006	10.8608	7.21307	28.5793	22.2283	27.1607	17.9631	32.4513	24.7008	38.9341	38.0091	18.5592	46.4441	65.3857	29.7367	41.1504	42.3775	26.582	57.6275	14.8243	16.3514
PF3D7_0418500	trafficking protein particle complex subunit 3, putative	BET3	11.9991	19.3008	13.3878	19.9533	16.1122	11.3278	45.0776	38.6338	27.3281	36.7589	39.4078	66.4232	56.4634	81.4669	58.9825	41.7609	44.8166	46.218	13.32	12.9057	11.1604	8.2772	14.8277	13.8123	9.75445	10.7242	8.08062	14.0137	12.1196	11.6553	25.6281	25.7775	24.433	24.9629	18.3835	23.9238	3.70421	29.4737	27.282	8.42956	11.9557	40.1826
PF3D7_0418600	NA	NA	0.560595	0.793518	0.608569	0.228297	0.501839	0.196011	1.31626	1.46915	0.928554	0.603908	0.404148	0.645767	2.63795	4.21758	3.40262	1.56085	18.1128	14.985	0.923424	0.334972	0.603741	0.257805	0.237513	0.358502	0.0976553	0.298486	0.100673	0.251814	0.264239	0.392064	0.886918	0.708421	0.724762	0.531459	0.92851	0.643532	0.302854	1.31143	0.357366	1.01931	2.71617	0.655571
PF3D7_0418700	NA	NA	36.388	42.7786	50.4814	26.3244	44.8387	27.6753	76.6615	65.7862	40.6427	44.2326	32.6527	38.6239	14.8706	28.8669	12.1798	29.3841	22.6176	22.2229	32.1701	35.3535	21.8922	26.7802	22.6362	23.917	21.6016	29.8772	32.8706	32.5323	40.9063	44.4391	71.2226	50.8456	61.2709	53.9859	31.4638	54.7564	20.4642	38.8846	15.3896	35.1623	13.299	43.7566
PF3D7_0418800	NA	NA	0	0.184659	0.259636	0.876591	0	0.903146	0.336935	0.644697	0	0.579706	0	0	0	0	0.368029	0.799089	0.387451	0.399567	0.924957	1.54343	0.632231	1.41413	0.911977	0.550616	1.24989	0.327456	0.966384	0.386756	0.579769	0.334535	0	0.362683	0	0	0	0.520203	1.99349	0	0	0	0	0.228836
PF3D7_0418900	NA	NA	0.157839	0.487462	0	0.964177	0.476874	0	10.4509	10.2112	12.706	14.5379	15.4755	18.9093	15.5641	14.076	14.8157	3.16415	13.2963	12.6573	0.203475	1.18835	0.13908	0	0.20062	0.363379	0.494918	0.216104	0.382659	0.765718	1.33916	0.441552	5.61864	3.59028	4.40772	2.84307	7.99969	6.52285	21.9267	20.1606	13.0402	14.3236	13.0995	12.5347
PF3D7_0419000	NA	NA	0	0.109707	0.308501	0.173596	0.429294	0	1.20105	1.14905	0.42364	0.172203	0.819498	0.654716	1.07779	2.58126	2.40512	1.18686	0.69056	2.13646	0.183174	0	0	0.168029	0	0	0	0	0	0.229773	0	0.198748	0.809287	0	0.991988	0.538823	1.27086	0.309055	2.96085	0.997202	0.97826	2.74801	0.999368	0.815714
PF3D7_0419100	NA	NA	0.67621	0.870154	0.734078	2.7538	2.04301	2.5535	12.3842	17.6202	18.1449	18.3024	18.1999	23.3684	20.5167	16.0067	28.4415	9.03718	14.2409	13.9331	0.290574	0.969732	0.595844	0.266549	1.14599	1.81624	7.06771	1.38874	4.18952	2.00473	2.73201	4.41393	8.66563	5.12713	9.44173	6.19695	23.856	9.31501	59.1808	33.5361	37.0718	39.9039	28.5359	17.2532
PF3D7_0419200	protein transport protein GOT1, putative	GOT1	13.2642	9.53486	11.4202	11.7348	7.83071	17.8476	11.5984	10.4799	26.5919	17.7382	29.6769	19.4945	21.9727	17.3734	33.0796	13.7537	21.488	25.9806	12.3823	23.1214	11.2848	10.8176	8.139	9.47703	11.4734	11.8984	11.4584	7.39635	18.8488	6.39767	10.4203	13.1784	13.3049	8.23869	14.9998	5.47163	15.2495	11.5559	12.596	17.6916	22.1969	7.00204
PF3D7_0419300	NA	NA	0.541747	0.278851	0.392072	0	0.181862	0.227305	35.3616	33.344	40.1109	32.1712	38.7957	35.1551	70.0857	65.3118	63.9119	25.3406	71.9655	61.5449	0	1.35958	0.159121	0	0.229527	0	0	0	0.291865	0	1.53213	3.03106	6.9425	5.20298	7.14403	4.10872	24.2269	15.711	34.1172	20.5309	31.496	32.7751	53.5978	31.1006
PF3D7_0419400	NA	NA	0.050677	0.0782541	0.0825207	0	0.0510362	0	0.249874	0.751321	0.906552	0.736998	2.15553	1.89723	11.3396	9.37349	10.4105	3.55567	20.2778	15.1971	0	0	0.111635	0	0	0	0	0	0	0	0.0307116	0.035442	0.108238	0	0.20638	0.0480431	0	0.137781	0.140799	0.177827	0.232599	0	1.39006	0.945509
PF3D7_0419500	NA	NA	2.45047	4.41462	3.42023	2.13843	4.58314	4.25953	5.42484	5.34726	9.04554	9.89926	8.74894	9.81251	14.8993	8.0938	16.6991	5.06834	21.5501	13.9387	2.25641	4.01617	2.87899	2.34583	2.96633	1.8805	1.82945	1.99705	1.69738	2.17001	5.5159	5.38619	5.81534	4.42378	5.83832	4.64622	6.78383	7.36034	3.56625	4.58602	3.57056	4.68709	3.03663	10.4949
PF3D7_0419600	ran-specific GTPase-activating protein 1, putative	RANBP1	1588.63	1774.24	1596.03	1202.28	1279.64	1156.46	2113.62	2340.1	2521.81	1796.65	2542.01	1784.01	3049.44	3276.53	2914.67	2124.53	3589.78	2838.83	2217.84	1067.07	859.072	1685.33	1192.42	1085.55	779.637	685.279	757.776	916.838	1337.63	1574.23	1419.96	1227.52	1230.93	1206.08	1041.78	1494.62	882.572	1086.11	1155.89	865.86	1208.3	1841.54
PF3D7_0419700	apical merozoite protein	Pf34	1.72994	2.07769	0.208664	1.409	1.93578	1.69363	1.89552	1.29533	1.71925	2.79539	1.66288	1.54993	28.9168	12.0627	26.62	5.77992	68.8166	52.5039	3.22127	3.51453	2.20182	1.59112	0.488626	2.2126	1.40632	1.18427	3.41732	1.55414	0.931899	1.88201	1.64216	1.45741	1.34192	1.4578	0.286528	1.67231	6.40852	2.42816	1.47039	2.28763	15.2765	1.6552
PF3D7_0419800	NA	NA	104.966	113.705	106.199	99.167	115.029	102.837	74.4953	81.9608	88.2887	100.614	96.4492	77.3601	69.1898	48.4676	67.1303	71.9956	63.3916	54.7727	152.016	116.024	146.308	126.628	100.818	153.392	122.145	119.459	120.721	135.32	124.66	125.74	102.777	110.259	109.828	131.093	116.662	113.29	120.84	92.4066	65.3288	189.195	104.323	93.3476
PF3D7_0419900	NA	NA	32.2643	36.3143	31.5269	8.86258	16.4658	12.5611	13.3222	13.9026	17.9554	12.667	15.3932	6.69364	42.7075	28.2138	32.99	22.1584	58.4764	41.5857	28.969	9.48849	13.1678	14.8466	21.493	20.396	15.6973	15.605	12.72	18.0587	33.8124	34.8608	13.5714	16.8498	12.4655	18.0009	15.1352	18.3763	3.07679	11.3522	3.02686	12.0506	14.7811	17.3579
PF3D7_0420000	NA	NA	31.8608	40.7166	39.1883	6.17714	15.1635	8.04892	56.9571	58.0239	46.443	36.1122	28.2493	13.0618	48.5033	53.2314	35.6118	30.5875	56.4325	41.1169	39.6589	9.93651	16.9199	16.904	22.3746	29.828	17.2915	17.9807	17.6356	23.296	49.6118	46.8011	61.9618	53.0504	57.2085	54.189	29.0671	56.9068	13.5828	27.9697	9.6552	36.7519	28.0958	52.8408
PF3D7_0420100	serine/threonine protein kinase RIO2	RIO2	43.9281	54.3658	54.3495	26.4393	38.7095	32.1191	68.7104	74.8779	60.991	68.1125	52.4711	33.3627	66.2867	77.8804	53.8448	44.4263	95.9308	69.6112	52.1875	39.3724	40.6047	44.1803	39.9598	40.4031	35.1103	40.317	36.6303	44.3101	74.3838	66.1125	83.0917	73.308	78.5486	79.8195	47.1856	87.8178	27.5207	40.9542	31.1329	57.9828	49.9787	78.4978
PF3D7_0420200	holo-[acyl-carrier-protein] synthase, putative	ACPS	0.842516	0.569183	0.571635	0.900655	2.96971	1.45819	5.34112	4.25825	2.04095	3.95662	1.97403	2.54762	5.1924	6.26127	4.21347	2.63901	3.24157	2.99105	2.03646	1.35925	1.11358	1.619	1.07087	0.60614	1.43096	2.88381	2.72342	1.87333	3.57411	2.65154	3.59895	1.11792	2.81841	1.89698	2.6688	4.00863	1.02411	4.58244	1.36956	2.35011	3.0369	5.84435
PF3D7_0420300	AP2 domain transcription factor, putative	ApiAP2	38.528	45.5953	45.898	13.0678	27.6658	19.3895	46.2729	46.166	34.9558	32.4839	23.2506	13.7757	25.2656	30.0565	19.4568	26.6071	39.8276	40.3046	32.7164	14.1234	18.0553	17.2347	25.6545	26.2237	25.4511	27.4495	27.1122	31.2974	38.2372	40.0396	47.2317	45.1865	42.6049	40.7321	20.3272	44.823	2.30527	12.7601	12.7771	10.6799	8.88039	37.6574
PF3D7_0420400	ribosome-recycling factor	RRF2	4.69379	7.06683	4.07638	5.73451	5.67247	10.044	44.3038	34.478	41.9832	40.3884	50.7582	49.203	46.2843	53.4866	49.1146	22.3476	47.5245	36.4639	2.72291	4.796	1.65438	2.22024	3.28129	2.97168	6.37771	10.1217	8.9139	7.40051	11.9472	11.4894	19.7161	14.2356	18.5691	18.0218	34.6345	31.3934	31.6246	30.6354	41.6512	40.8496	32.8478	40.8682
PF3D7_0420500	NA	NA	0	0	0.341832	0	0	0.396355	0.887205	0.424399	1.87764	1.90808	0.908036	1.4509	6.36923	3.64017	8.23719	0.526034	8.6719	7.89095	0	0	0	0	0	0	0	0	0	0	1.52663	0	0	1.43251	0	0	1.87755	0	1.74973	0.883952	0.963512	0	1.55028	1.50641
PF3D7_0420600	NA	NA	0.421967	0.814488	0.458078	0	0.743677	0.663929	11.2947	14.0759	21.5447	20.3278	19.6214	10.0861	50.2777	25.7841	38.1474	7.40166	66.8204	52.1671	0.271985	0.113462	0.371817	0.498994	0.536337	0.364296	0.11026	0.144433	0.25575	0.0852946	4.85874	2.656	8.56189	5.75896	8.71496	7.9007	8.80616	15.029	6.15498	5.92278	5.08399	8.94545	12.539	18.7738
PF3D7_0420700	erythrocyte membrane protein 1, PfEMP1	VAR	0.145523	0.0449425	0.0631905	0.0711153	0	0.0366348	0.0410018	0.0392268	0.0433872	0	0	0.0335264	0.147176	0	0	0	0	0.0729354	0	0.0313035	0.0512911	0	0.073986	0	0	0.0398483	0.04704	0.0470646	0	0.0407097	0	0	0	0	0	0.0316519	0	0	0	0.216491	0.0614103	0.0278472
PF3D7_0421300	erythrocyte membrane protein 1, PfEMP1	VAR	0.599774	0.374872	0.589091	0.418718	0.201342	0.0719004	5.9951	5.11967	4.17249	3.21903	2.26492	0.921198	7.54623	9.90512	3.82354	2.05163	7.35663	8.63641	0.441821	0.153592	0.226497	0.303968	0.108905	0.230134	0.298515	0.332381	0.161563	0.207833	1.00389	1.67786	2.68404	1.64579	2.6918	2.05779	0.255446	3.04392	0.753843	0.320705	0.240329	0.722314	0.502189	2.81466
PF3D7_0421500	rifin, pseudogene	RIF	2.68204	1.88251	2.64687	4.76611	12.523	14.7315	25.4182	17.0882	15.6293	23.0484	12.656	23.8736	0.616477	1.208	0.375189	2.44391	0.394989	0.20367	0.314317	0	0	0.288329	3.71888	2.24531	7.90007	4.67357	10.0489	3.9428	30.439	20.4626	60.7556	44.3687	57.5913	51.3151	42.1609	42.4259	9.14523	27.0362	10.2584	25.0282	9.26029	15.8636
PF3D7_0422000	NA	NA	1.16762	3.15526	1.47879	0.951002	2.54777	2.44953	29.0601	18.0976	21.1774	22.6409	19.3606	27.3486	23.8636	38.5658	24.8545	12.3536	16.7085	17.7187	0.250868	0.837222	0.685899	0	1.97878	0.672025	0.813592	1.06576	2.20168	2.20283	2.12282	1.90539	4.43349	4.72163	2.71718	4.42772	5.80175	7.19561	18.383	15.8425	14.44	8.97469	13.4133	14.3371
PF3D7_0422100	NA	NA	42.6946	46.3752	45.9959	36.8895	42.9973	50.063	64.9498	82.9237	98.9786	104.272	120.778	112.388	150.02	114.745	172.863	65.3576	175.674	122.586	44.366	49.0632	50.0653	45.497	38.7913	50.8278	54.8047	49.6757	47.3588	55.1277	54.1093	53.1338	73.5057	62.0357	66.6778	64.3301	104.54	85.4481	105.767	83.8518	76.6211	99.2586	139.295	90.7091
PF3D7_0422200	NA	NA	7.92465	9.80779	8.77839	2.60454	4.72335	3.90487	14.8302	14.9214	22.0271	19.6179	14.8392	6.5374	17.2672	10.3922	12.2396	6.80351	17.3157	13.8289	10.1401	3.76357	5.64844	5.2159	5.88655	7.49739	4.04152	4.4487	3.36244	5.25433	11.1911	11.5575	12.5818	9.89914	13.1042	9.71504	15.0128	18.5157	3.69683	12.6709	3.77899	18.0011	9.28596	21.5793
PF3D7_0422300	NA	NA	12.9215	16.4129	9.95481	14.5982	25.1865	33.4037	45.6065	48.6882	63.1726	69.7113	94.7569	117.637	97.4847	79.6215	120.797	49.439	92.734	124.301	8.23916	14.1966	11.5082	11.1726	13.7747	8.63649	8.56797	12.8405	12.4631	12.4697	13.4722	7.19064	11.4745	18.541	19.2382	16.9918	53.8495	36.2643	73.3451	75.6671	102.14	56.222	118.047	133.735
PF3D7_0422400	40S ribosomal protein S19	RPS19	2304.57	2415.07	2395.18	2098.34	2898.09	2369.47	3517.65	3087.31	1966.58	2157.45	1950.18	2357.54	1910.48	2958.1	1950.46	2691.7	1415.83	1510.3	1859.35	2092.44	1687.12	2675.86	1965.53	1734.51	1965.59	2443.36	2755.21	2306.89	2234.97	2322.93	3106.14	2829.01	2587.28	2448.47	2587.57	2124.9	2090.19	2384	2023.63	1933.11	2218.04	2061.61
PF3D7_0422500	pre-mRNA-splicing helicase BRR2, putative	BRR2	26.7213	23.4751	24.5835	17.4946	26.5376	22.6336	46.3646	45.1799	43.3434	44.3498	47.1704	32.2373	50.2031	42.6178	42.4599	31.3496	48.4787	46.2078	33.5481	30.9437	26.3879	25.7226	27.0104	34.1711	28.9313	30.3485	29.0445	32.7252	43.1659	38.992	45.1551	45.3466	46.7645	44.1975	27.8113	51.507	5.54086	25.973	25.1928	22.2433	17.3989	40.9154
PF3D7_0422600	NA	NA	2.66647	2.40187	0.482444	5.42948	4.92318	4.47516	6.88685	7.18769	13.25	7.54029	21.1457	17.9176	11.2365	3.66968	13.6771	8.90899	10.0792	7.42458	1.71871	3.34592	1.56638	0.525536	1.12973	3.06939	3.71598	2.12962	0.718277	2.87461	3.2319	4.35132	2.53118	6.73921	8.2736	2.52788	7.28716	6.76633	3.08684	2.49513	6.11933	1.98342	7.81421	7.22861
PF3D7_0422700	eukaryotic initiation factor 4A-III, putative	EIF4A3	140.389	145.637	147.184	148.216	136.542	122.851	159.395	162.215	129.249	112.65	126.859	140.119	111.431	146.89	112.206	163.58	81.781	104.419	124.372	135.655	130.341	166.016	165.403	111.978	109.213	116.841	119.538	111.178	128.59	117.91	146.957	151.891	129.413	138.866	141.665	104.573	134.024	139.915	153.121	119.208	149.011	162.844
PF3D7_0422800	serpentine receptor 12, putative	SR12	0	0.102719	0	0	0	0.167462	1.12455	1.97242	3.37158	4.03086	7.09753	6.13014	10.4278	5.27312	17.4013	2.88928	7.11232	7.00133	0	0.143092	0	0	0	0	0.278107	0.182152	0.322538	0	0.806261	0	0.568305	0	0.619203	0.126126	4.16469	1.59154	8.5016	5.60212	6.30988	5.34388	8.70214	3.43691
PF3D7_0422900	NA	NA	1.28934	0.597291	1.11975	1.57522	1.29848	2.92129	3.63279	6.6035	1.92207	3.7502	5.20533	8.02027	3.25997	1.70346	3.17444	0.430785	7.10168	2.80026	0	0.277351	0.454443	0	0	0.593668	0.269523	0	1.45872	0.833992	3.43805	2.16415	4.7733	2.73728	3.3005	2.93359	3.84396	3.08483	2.14936	2.89558	3.94525	0.767251	1.0882	4.44111
PF3D7_0423000	NA	NA	0	0	0	0	0.725359	0	10.8232	8.73676	7.87386	5.81927	9.69268	6.91403	18.2109	15.0668	11.822	4.41183	28.0034	21.4588	0	0	0.211551	0.28391	0	0	0	0.32871	0	0.388238	0.872986	0.335816	2.73483	2.54851	3.91094	2.04846	3.57886	7.83295	8.67155	3.70684	5.14242	7.85771	11.1447	8.26965
PF3D7_0423100	NA	NA	71.6138	83.5964	63.397	73.9517	75.5558	78.8747	150.731	145.93	151.875	182.88	212.045	225.386	247.891	202.746	253.85	129.605	214.073	194.418	90.6709	97.656	95.7809	91.2395	84.5223	79.0003	55.6923	86.0853	61.6619	79.2718	75.9498	61.4133	86.1891	82.0946	79.855	70.3165	162.67	101.525	223.84	175.906	157.826	175.661	289.317	170.076
PF3D7_0423200	NA	NA	6.86081	7.76914	10.9236	8.382	6.90945	13.2417	18.042	14.7951	15.0006	30.4875	21.763	31.0859	63.6052	27.9485	80.9395	11.4614	73.3556	55.3999	15.3304	19.6778	3.62725	10.8176	5.23222	5.79152	3.82448	7.20164	5.54437	7.02654	17.1857	8.95674	15.6305	15.9527	15.4337	12.5748	14.318	15.9175	1.27079	14.1239	14.3454	9.52623	8.36405	24.9448
PF3D7_0423300	NA	NA	1.31367	1.82568	0.285218	0.641976	0.529193	0.661423	0.185067	0	0.5875	0	0.378824	0.151326	9.6323	4.98984	13.7459	2.41402	41.4987	27.2141	0.169349	0	0.115754	0	0.166973	0.302435	0.137304	0	0	0	0	0.183749	0	0	0	0.249079	0	0.142865	0	0	0.100492	0	2.30986	0.754151
PF3D7_0423400	apical asparagine-rich protein AARP	AARP	7.47346	10.4307	5.61671	4.56524	0.868435	0.361811	0	1.16223	2.99949	1.04507	3.31558	2.6489	99.2034	82.5981	107.039	31.6923	301.743	307.097	2.96439	5.25568	2.27951	3.0592	2.19209	1.65437	2.10302	0.98387	0.232287	1.62686	0.348393	0	0.409284	0.871769	0	0.272501	0.428478	0.937798	1.59723	1.21037	3.07838	1.28286	84.5053	0.825068
PF3D7_0423500	glideosome associated protein with multiple membrane spans 2	GAPM2	6.7198	9.8577	6.56537	9.85166	2.70697	3.17191	40.4701	49.3599	58.602	58.6358	118.932	113.015	295.419	200.311	358.034	100.471	360.056	414.817	2.38224	7.40818	5.47708	4.37055	2.13528	3.09408	2.98499	4.14017	1.62912	1.49414	3.66514	2.11483	6.21936	5.34981	11.7283	6.68907	55.5941	19.5488	138.625	79.936	139.178	67.2291	362.148	88.2447
PF3D7_0423600	NA	NA	35.1576	42.8317	45.2935	13.669	28.7949	19.8043	51.6089	58.4328	67.8153	58.5216	64.1914	33.4733	75.976	61.5905	52.6056	41.8593	78.6043	67.1409	47.4261	13.8303	23.3799	17.4571	29.3796	47.9828	34.2291	31.7803	32.0219	39.2002	65.3554	63.4131	63.6128	66.8636	69.2045	74.5052	41.2316	81.0324	9.66012	27.591	22.11	53.6902	39.9737	65.2331
PF3D7_0423700	early transcribed membrane protein 4	ETRAMP4	17.8381	16.5977	15.8889	15.6464	22.1102	8.06019	31.5735	17.8774	12.955	8.86908	31.6553	40.5697	126.054	270.421	163.287	95.5116	168.199	190.27	4.12742	2.45972	6.44845	4.86792	9.88308	5.79152	12.4295	15.0295	18.8508	14.0531	8.31567	9.5965	15.6305	4.16159	12.2405	10.8404	12.2726	7.46131	10.1663	12.8399	25.192	7.4849	51.7928	16.6298
PF3D7_0423800	cysteine-rich protective antigen	CyRPA	3.97033	5.99759	2.81093	4.85063	3.30308	2.60743	9.48429	7.91041	7.20538	8.78662	13.9382	19.4873	24.8782	15.3945	24.4379	9.22805	45.0233	43.2589	1.55773	1.48532	2.89003	1.63307	1.31646	1.39095	0.721699	1.2999	0.697501	0.837438	1.67382	0.482909	2.70376	3.66479	2.812	2.94572	7.20504	2.44051	11.2708	2.90754	11.3564	3.33849	15.662	2.97297
PF3D7_0423900	NA	NA	4.44412	2.745	1.44733	7.05832	0.895124	2.79698	2.50431	1.79692	1.9875	2.69296	0.640777	1.5358	1.68548	2.93574	7.52241	5.93933	7.19945	10.3944	10.3123	36.3271	24.6705	8.93412	12.427	21.4857	6.50297	2.12962	3.95052	5.3899	2.69325	8.08103	2.53118	5.39137	1.0342	2.52788	1.98741	3.38317	8.0258	1.87135	1.35985	3.30571	4.06339	1.27564
PF3D7_0424000	NA	NA	17.8263	19.1854	24.2386	23.5387	36.6307	38.0775	72.0421	68.4379	86.9703	80.3059	80.7435	74.0492	28.4545	27.6555	30.4787	19.5524	34.7125	28.7287	9.51713	6.19737	5.71188	8.09145	15.563	17.6181	32.9353	24.7766	33.6135	23.8766	74.6403	65.4842	160.501	128.609	155.25	161.828	107.903	124.152	57.7825	64.954	52.7558	96.1676	51.924	56.8539
PF3D7_0424100	reticulocyte binding protein homologue 5	RH5	1.07013	1.37706	0.387236	0.581067	0.598731	0.449002	0	0.801284	0.177253	0.576406	0.857207	0.684843	6.16302	4.90915	4.57417	1.58908	41.7992	25.5261	1.83938	0.767321	0.733404	0.703042	0	0.273741	0.497109	0.162796	0.288265	0.192277	0.144117	0.166315	0	0.360618	0.276702	0	0	0.258621	0.330357	0	0.181915	0.70756	2.25796	0
PF3D7_0424200	reticulocyte binding protein homologue 4	RH4	0.401446	0.479016	0.158473	0.0445869	0.110261	0.229688	1.07968	1.57401	0.652854	0.486521	0.368344	0.0420399	1.43025	1.4465	0.786214	0.42677	12.0017	9.45045	0.282282	0.0785048	0.353735	0.043157	0.0927734	0.168039	0	0.149901	0.0589849	0.147539	0.530808	0.714661	0.883405	0.664109	0.849285	0.588171	0.380814	0.754098	0.0506983	0.256125	0.167506	0.325758	0.256681	0.279348
PF3D7_0424300	erythrocyte binding antigen-165, pseudogene	EBA165	1.40125	2.36663	2.13914	1.39095	1.01429	1.21261	4.4416	2.71485	2.61111	3.02492	1.89412	1.66458	2.65719	5.06216	4.24506	2.56032	39.2996	39.0654	1.52414	0.565169	1.42764	0.621389	0.278288	0.907304	0.686522	0.659488	0.530802	1.31	3.556	3.73622	5.17511	3.91778	4.07609	5.35519	1.82769	3.66687	0.729971	0.67609	0.669947	0.846871	1.75549	2.17866
PF3D7_0424400	surface-associated interspersed protein 4.2 (SURFIN 4.2)	SURF4.2	0.263176	0.101597	0.228558	0	0	0.0662534	0.0370756	0.283764	0.15693	0.0637896	0.0379461	0.090948	0.166353	0.173851	0	0.131895	0.468977	0.0219838	0.441048	0	0.115949	0.155608	0	0.0908829	0.027507	0.072065	0.0212678	0.0851155	0.0956948	0.294492	0.0749466	0.359179	0.122488	0.0498994	0.0784613	0.228968	0	0	0.0201322	0.0783041	0.0185099	0.0503612
PF3D7_0424500	serine/threonine protein kinase, FIKK family	FIKK4.1	30.7779	34.4022	27.0788	25.5595	28.8688	24.1815	4.67598	4.33799	2.9988	3.77879	6.09099	4.63451	2.41594	3.98658	2.47637	22.5156	3.42176	3.94885	33.5825	54.6311	37.9325	38.5371	33.3669	45.0383	38.2662	38.6966	33.0004	37.0025	29.2583	29.1222	15.3242	20.2858	11.3521	19.8335	13.344	11.5948	2.93424	9.31768	3.84709	6.88309	2.12225	5.77416
PF3D7_0424600	NA	NA	307.246	303.081	290.311	305.235	264.639	281.914	444.517	395.578	380.28	447.075	356.152	534.15	107.838	116.17	106.066	261.702	154.561	193.839	340.838	534.171	385.791	390.821	309.849	338.549	298.738	316.329	376.359	355.309	304.044	287.259	311.132	295.797	328.57	275.564	382.672	352.604	411.938	533.677	391.055	503.393	243.96	291.265
PF3D7_0424700	serine/threonine protein kinase, FIKK family	FIKK4.2	288.922	367.067	416.212	142.971	195.562	172.389	34.7189	37.2211	32.2323	28.253	18.8382	17.5882	9.19776	13.6231	4.8882	82.6832	15.2725	13.6101	186.724	63.3735	107.721	69.9805	119.632	147.092	231.024	261.309	215.638	284.851	384.717	381.265	275.551	384.986	233.697	399.613	46.2076	231.019	13.4524	29.126	16.6184	33.6144	11.8559	61.0335
PF3D7_0424800	NA	NA	84.1462	80.6343	78.3902	99.8869	63.9076	71.6132	5.60488	6.7028	6.52405	4.5806	4.87601	7.10367	2.26335	0.328524	2.14275	245.584	1.93357	1.99403	431.337	719.322	495.181	557.989	329.456	358.135	97.7214	113.574	101.599	112.428	57.3843	72.6227	13.3128	12.9714	12.0361	17.3501	17.199	11.2496	4.14519	5.30512	5.32608	8.58225	1.95876	3.61633
PF3D7_0424900	NA	NA	953.391	895.381	863.96	1003.31	745.054	779.582	8.08169	8.0292	9.86753	12.033	10.1802	21.8581	20.9201	11.2959	23.7664	437.521	22.876	16.4034	764.277	1448.78	766.981	1002.71	798.423	521.932	384.202	539.834	431.319	520.922	451.955	445.339	87.6531	149.226	73.1678	159.809	135.837	98.1408	22.3753	45.8348	12.8276	41.6868	18.622	25.5442
PF3D7_0425050	NA	NA	9.89401	17.8244	10.7407	4.02924	3.32138	0	0	0	0	7.99384	0	0	0	0	0	5.50951	0	0	38.264	35.4718	20.3423	7.80006	29.3433	0	0	2.25772	2.66519	13.3329	15.9894	27.6783	0	0	0	3.12659	0	17.9333	0	0	0	0	0	0
PF3D7_0425100	NA	NA	5.17114	7.98514	6.60432	5.94607	3.06341	4.59464	0	0	0	0.368648	0	0	0.7691	0.502354	0	2.54079	0	0	5.48987	12.7595	6.4328	13.3093	3.09305	2.45104	1.9076	4.16473	2.21236	5.65677	2.21213	3.40381	0.433126	1.8451	0.353937	0.865125	0.453438	1.65404	0.845136	0.426957	0.465386	0	0	0
PF3D7_0425200	NA	NA	2.98391	5.65487	3.82822	3.64551	4.09781	8.87767	0	0	0.404383	0	0	0.624956	0.342932	0	0	4.07847	1.75779	0.906378	5.94482	11.9621	6.69271	6.41564	4.82703	4.37156	2.83524	3.5283	3.069	3.72859	2.63029	3.03543	0	1.23406	0.315632	1.80016	0	0.295007	0	0	0	0	0	0
PF3D7_0425400	NA	NA	7.02248	8.75855	7.62344	10.8894	9.79235	6.79955	0	0	0	0	0	0	0	0	0	6.31694	0	0	11.4902	16.8491	7.37785	12.1372	9.26914	9.63815	2.54072	2.4037	4.36539	5.02282	9.82109	6.42249	0.384586	0.819163	0.628544	1.28029	0.402621	0.587471	0.750423	1.13733	0.206615	0	0	0
PF3D7_0425500	NA	NA	2.05449	0.793124	1.78425	1.50601	1.65525	1.81024	9.26184	9.41469	5.2066	3.98382	3.85097	5.67993	0	1.69647	0	0.686431	0.332827	1.71617	0	0	0.181032	0.242953	1.04454	0.472988	1.07367	1.40645	1.66028	0.996689	8.46653	4.8853	16.6746	12.462	19.3633	12.8549	13.7815	13.4059	5.13732	7.20928	1.72879	4.279	3.32347	7.86295
PF3D7_0425600	rifin, pseudogene	RIF	0.205449	0.634499	1.56122	0.502004	0.413812	0.517211	2.02603	2.21522	1.83762	2.73887	1.48114	4.96994	0.259729	0	0	0.686431	0.665654	0.171617	0	0	0	0	0.783403	0.472988	1.50314	0.421935	1.32822	0.830574	1.99212	2.01159	4.09552	6.54256	3.34674	3.31111	2.75631	4.2452	1.71244	5.47905	0.628652	3.05643	0.722494	2.94861
PF3D7_0425800	erythrocyte membrane protein 1, PfEMP1	VAR	0.12342	0.367551	0.382806	0.107703	0	0.133159	0.273226	0.118817	0.183987	0.448726	0.025422	0.121861	0.334344	0.524122	0.244179	0.117817	0.485568	0.265104	0.0454584	0.0568906	0.124288	0.166799	0.0448205	0.0405913	0.11057	0.13277	0.17098	0.142558	0.363294	0.221956	0.200842	0.320843	0.225667	0.200581	0.10513	0.191746	0.0734798	0.0494953	0.0809253	0.236069	0.198411	0.253046
PF3D7_0425900	rifin	RIF	125.517	158.093	153.422	175.018	554.364	551.88	671.991	440.467	256.956	658.471	492.614	778.682	33.1494	31.8415	36.7893	88.8981	44.9777	60.2351	5.96526	4.56222	8.49459	13.6801	236.732	110.97	282.733	223.987	413.99	233.839	1157.94	960.892	2414.81	2234.35	2639.61	2053.41	1657.78	1644.54	276.95	681.435	289.083	729.705	249.652	613.57
PF3D7_0426000	erythrocyte membrane protein 1, PfEMP1	VAR	1.2241	1.35016	0.885901	0.462895	0.264166	0.476917	3.94167	5.1066	2.38962	1.87205	1.42878	0.805757	5.89524	7.31615	2.64604	2.04493	6.94061	8.86184	0.300575	0.21943	0.410901	0.275723	0.370446	0.134197	0.0304624	0.119712	0.400398	0.377042	0.671184	0.896864	1.78448	0.883934	1.52605	0.828911	0.30412	2.69417	0.121464	0.245451	0.51279	0.0867172	0.573962	2.28665
PF3D7_0500100	erythrocyte membrane protein 1, PfEMP1	VAR	1.47574	2.71703	1.63284	1.24819	1.37188	1.42889	12.8337	16.2561	18.2341	18.6758	20.4596	20.1379	46.82	36.276	44.4125	16.4512	69.284	66.6856	1.2073	0.854664	1.90051	1.30884	2.59715	1.56806	1.66108	1.55423	1.8118	1.97337	7.18908	6.31161	13.1331	11.8779	14.7275	12.6451	7.78401	16.2342	1.18273	8.24562	13.3297	6.8818	20.1997	24.5739
PF3D7_0500600	NA	NA	0.813793	2.98452	0.220859	0	0.20489	0.512174	2.57952	2.19364	1.21315	0.986253	1.46671	1.64051	6.68718	6.7198	3.13064	4.41834	4.94378	11.5563	0.524543	0	0	0	0	0	0	0	0	0.164497	0.73977	0	0	1.23406	0.236724	0.192874	1.21309	1.9913	0.84788	0.856687	0.933793	0.605331	3.00492	1.16795
PF3D7_0500800	mature parasite-infected erythrocyte surface antigen	MESA	80.7402	219.921	219.575	4.10786	23.5274	23.7449	3834.6	3950.8	2390.32	818.051	565.897	92.5545	460.068	862.567	141.376	115.258	728.978	614.806	11.8214	1.12719	1.00041	7.12605	36.8536	55.7442	66.909	31.0291	59.9546	50.0295	1724.4	1327.18	5046.34	3318.72	4291.19	3087	521.914	4184.92	33.6064	307.867	70.3154	757.006	331.877	2781.58
PF3D7_0500900	serine/threonine protein kinase, FIKK family	FIKK5	0.521315	0.724501	0.226371	0.254761	1.89004	1.57487	0.8813	0.562099	0	0.505434	0.150332	0.960831	1.31809	1.72188	2.24614	0.348355	2.87139	2.00315	0.134409	0.224281	0.183743	0.246591	0	0.120018	0.326926	0.785131	1.34811	0.0843012	0.126372	0	0.445377	0	0.121316	0.197688	0.777106	0.113389	0	0.585379	0.0797583	0.620439	1.02664	0.498793
PF3D7_0501000	NA	NA	535.149	538.86	595.541	409.763	676.519	572.068	767.096	756.862	607.003	537.119	428.555	422.032	248.275	361.206	236.441	371.396	201.08	220.403	183.843	104.064	170.933	178.012	318.584	335.781	618.054	661.53	814.679	702.71	933.513	864.055	1461.77	1272.43	1350.11	1261.39	717.203	1004.97	442.249	639.936	440.228	662.19	388.037	721.068
PF3D7_0501100	heat shock protein 40, type II	HSP40	456.827	424.501	404.603	493.717	552.141	473.444	148.954	151.936	120.996	123.617	139.896	159.769	148.999	168.452	155.761	506.779	137.029	137.937	593.72	683.329	569.823	792.306	536.375	588.322	479.099	482.295	557.401	482.638	320.195	362.337	311.287	340.715	251.842	299.827	125.858	213.74	38.0164	105.413	158.791	65.0002	67.8033	157.252
PF3D7_0501200	parasite-infected erythrocyte surface protein	PIESP2	311.778	308.382	344.613	301.73	576.288	530.331	712.474	747.502	693.857	735.091	728.099	771.417	323.648	277.056	327.699	241.354	303.048	300.366	29.0332	22.2457	35.2349	31.5245	273.406	218.156	535.963	386.385	608.034	404.081	1312.69	1051.35	2233.43	2084	2248.3	2279.62	937.507	1807.64	294.136	602.77	514.859	702.234	385.119	1143.69
PF3D7_0501300	skeleton-binding protein 1	SBP1	21950.1	25895.3	27739.1	12712.1	12434.2	12415.8	308.186	306.088	335.511	332.525	183.105	131.979	184.215	180.946	100.417	9725.08	190.411	252.27	29976.9	10589	17151.7	14475.7	17870.9	15829.3	9829.74	11705.1	8085.69	13145.6	12809.2	15668.3	2741.13	4943.16	2600.21	5453.51	1246.09	3442.41	195.732	347.129	192.59	745.768	279.558	738.617
PF3D7_0501400	interspersed repeat antigen	FIRA	257.239	456.397	471.033	36.2983	55.6993	51.1013	34.4182	44.6077	40.8171	19.7686	12.2321	4.15227	92.2438	113.346	30.479	331.681	144.335	146.719	1007.19	136.437	284.448	205.467	364.955	619.041	133.538	144.767	85.2116	208.577	276.173	388.483	56.0436	79.5078	49.3982	78.4937	13.6774	83.5895	3.43947	3.27078	6.9075	5.63334	29.0144	24.8738
PF3D7_0501500	rhoptry-associated protein 3	RAP3	1.87517	2.8956	3.05347	3.05459	0.629489	1.57356	0.440284	0	1.16475	0.378761	6.08339	7.56025	95.6139	50.5812	115.901	27.6712	179.735	156.247	0.805781	2.01685	2.06539	1.8479	0.595855	0.359754	0.326654	0.534872	0	0.126347	0.189401	0.218574	0.667511	0.710894	0	0	2.09644	0.169942	2.38788	0	5.61829	0	63.0858	0.897082
PF3D7_0501600	rhoptry-associated protein 2	RAP2	4.39734	4.85018	2.21634	3.0699	1.26529	1.58145	0.663736	0.423335	0.234117	0.19033	5.20812	7.95997	55.9882	46.1662	98.5986	22.3004	112.961	101.801	0.80982	3.04044	1.38383	2.41431	0.798456	0.723115	0.492437	0.215021	0.888395	0.25396	0	0.439339	0.447238	0	0	0	0.702317	0.170794	6.54504	0.220434	4.80549	0	52.2459	1.2021
PF3D7_0501800	chromatin assembly factor 1 subunit A	CAF1A	4.36366	5.16599	6.00031	1.91922	6.09383	6.00532	84.5884	87.4352	81.7902	64.025	73.5716	54.7568	150.417	148.549	120.686	47.1403	158.159	122.475	0.900051	0.312889	0.410138	0.688028	1.92274	2.34408	3.46626	3.90332	5.40709	3.5282	22.5663	17.1715	41.7538	27.0864	42.6499	29.6751	39.2019	54.2895	36.2906	37.3209	44.1071	50.5488	75.5814	69.2516
PF3D7_0501900	trafficking protein particle complex subunit 13, putative	TRAPPC13	2.29652	2.15306	2.1369	1.60326	1.4868	2.27126	3.92855	5.74827	8.80328	11.1328	8.75114	7.74733	16.3826	13.0033	15.3975	6.85083	25.7767	13.7024	3.5949	3.35217	2.74629	1.93981	1.87648	3.21	2.74321	1.45984	0.927931	1.85683	3.97643	5.27724	5.13855	5.97002	3.81734	3.26574	7.33572	8.74132	12.5332	10.361	3.26257	10.9815	9.22976	10.8296
PF3D7_0502000	vacuolar protein sorting-associated protein 11, putative	VPS11	7.23592	8.47515	8.54982	3.36773	4.80857	3.5317	10.5405	11.0794	15.263	15.7491	14.7625	7.54145	19.2909	14.0635	16.1337	6.82521	25.1986	19.0377	10.9144	4.18249	3.51328	4.19108	6.44425	4.30631	2.31519	2.32512	1.82983	4.69636	10.9778	10.7408	10.934	9.70383	12.3141	11.9464	4.84284	16.3274	3.07715	4.07639	1.73213	5.56543	4.22372	14.6944
PF3D7_0502100	NA	NA	3.19977	2.26462	2.89466	2.28038	4.02806	4.69892	7.88857	12.5785	7.55251	19.0662	22.2991	23.3441	27.6418	14.5319	29.1322	11.5817	22.8943	16.2598	1.37497	2.29434	0.469914	1.26129	0	1.5347	1.11479	0.365078	2.15483	1.94036	6.14062	5.22159	8.35288	4.04353	5.27442	5.81413	15.1043	11.0195	20.0028	14.9708	14.0745	10.3138	12.7528	13.5218
PF3D7_0502200	protein Mpv17, putative	MPV17	6.49202	9.15308	8.57967	8.96598	4.97459	7.81641	8.54934	14.8367	15.5688	19.1564	16.4827	14.9567	26.2274	17.0144	20.8483	12.0241	23.7776	19.8056	6.91357	11.9917	6.21789	6.50884	7.17531	4.71124	3.68773	6.95622	6.38684	6.27607	15.2242	10.4625	9.44488	15.4091	13.3013	12.8444	16.1992	18.2645	3.92113	16.2436	7.98912	10.4979	11.7129	18.3646
PF3D7_0502400	merozoite surface protein 8	MSP8	79.0087	85.4346	87.5901	48.2633	69.0159	68.4548	3.69051	2.4009	2.03071	1.01594	2.26629	1.8106	0.662352	1.38441	0.967461	57.7669	4.41358	3.32616	157.777	102.56	126.496	110.903	92.5651	135.215	99.2269	127.686	102.378	128.95	77.2198	93.6574	22.2314	35.435	21.7026	37.2525	12.6523	24.0451	2.47464	4.41237	2.24444	3.27365	2.21098	5.71477
PF3D7_0502500	NA	NA	0	0.325248	0	0	0.424244	0.132563	0.148365	0	0.156996	0.127633	0.303696	0	0	0.347849	0	0	0.170609	0.175944	0.271528	0.339814	0.185596	0.124539	0.133859	0.121228	0.110074	0	0.25532	0.0851513	0.638233	0.441923	0.599825	0	0.245079	0.199682	0	0.229064	0.146301	0	0	0.313348	0.0740708	0.201529
PF3D7_0502600	NA	NA	0.422441	0.924123	0.305728	0.34407	0.638153	0.26587	6.64556	6.26298	10.2859	9.04472	9.33951	6.97493	8.27777	5.46494	8.66729	2.11714	10.7215	6.58702	0.726108	0.908715	1.24078	0.666073	0.447449	0.648366	0.294356	0.33739	0.398281	0.284635	2.04808	1.18177	5.11283	1.70828	4.17805	1.2682	8.81605	6.43182	4.30355	13.7365	3.28541	16.5493	5.10048	11.3173
PF3D7_0502700	NA	NA	4.74713	1.95477	3.60736	4.05977	3.82462	4.97946	18.9483	16.8484	19.343	17.0677	11.6359	10.0253	12.0026	16.2022	9.49626	11.1025	9.22839	6.34464	3.87579	4.42501	2.6492	4.67807	4.6259	2.18578	2.48084	4.333	3.45263	4.09414	7.67169	3.54134	7.88595	6.47883	12.7042	7.50067	11.0863	13.2507	3.51713	20.4336	11.6205	15.7722	6.78889	18.9252
PF3D7_0502800	NA	NA	21.7955	24.8915	19.7173	26.0733	14.176	24.0054	13.4334	17.7479	47.3832	23.6629	27.4977	18.3071	9.75866	0.749891	9.08338	11.3783	8.09156	11.7583	52.6823	72.2802	93.2251	38.6612	24.8172	95.6516	42.7136	36.369	41.4649	48.0951	31.9209	26.6755	20.0431	17.9029	32.2288	22.3846	58.8877	27.6537	44.1553	42.7019	39.5983	100.652	29.7008	19.1161
PF3D7_0502900	NA	NA	95.1256	96.1783	99.9879	124.518	137.617	133.042	538.17	419.224	244.223	208.61	276.492	349.606	295.872	617.169	339.225	350.617	226.262	228.923	28.2242	34.9162	42.5753	53.5667	60.4542	68.6545	137.301	115.253	200.724	125.136	105.232	103.488	259.072	208.363	173.054	163.186	373.633	176.524	355.538	456.721	363.264	366.145	292.575	313.5
PF3D7_0503000	NA	NA	8.57732	9.01387	5.43162	10.7702	28.3138	21.893	156.415	156.708	177.946	168.342	237.382	205.569	286.749	258.909	321.168	119.806	262.465	287.59	5.83579	3.58764	5.03862	6.76203	9.69076	6.58227	13.4475	8.64459	20.602	14.2556	45.05	37.6587	97.0268	75.1512	111.723	73.6354	143.486	130.334	209.182	166.543	221.265	180.062	222.707	202.661
PF3D7_0503100	4-diphosphocytidyl-2-C-methyl-D-erythritol kinase, putative	IspE	2.44592	2.06831	3.03455	4.5535	5.16111	5.57108	18.8696	23.0761	25.5235	29.5014	37.9536	35.8229	43.7315	32.1227	51.6171	12.0636	37.3595	27.4365	1.50148	2.75599	1.53945	2.4792	2.66474	3.3518	3.28688	3.50828	2.63546	2.54267	7.34087	6.6795	13.765	14.3064	15.5851	13.1398	14.4106	14.5667	12.4587	10.1359	20.0471	8.83693	16.8752	18.722
PF3D7_0503200	cell division control protein 6, putative	CDC6	0.191823	1.08609	0.832954	0.468708	0.321971	0.160969	14.3225	13.6163	17.1574	13.7935	12.6305	7.73383	21.9869	15.5227	13.1844	3.09769	27.3462	21.6317	0.247284	0	0.281708	0	0.0812714	0.147205	0.200492	0.437722	0.413376	0.258495	3.33249	2.59367	8.46717	4.84811	7.8119	5.45559	6.5767	11.5432	1.77651	6.19263	2.39674	7.89525	7.91499	14.9276
PF3D7_0503300	serine/arginine-rich splicing factor 12	SRSF12	405.174	409.747	442.93	251.221	435.821	295.844	1036.75	907.963	891.803	597.21	728.645	444.074	679.372	874.766	536.727	550.505	745.409	571.88	547.68	229.671	283.579	346.522	272.446	428.349	366.259	334.15	430.51	474.677	603.174	678.776	872.027	764.796	810.989	721.322	276.597	882.819	75.7805	196.97	265.735	288.713	303.941	768.161
PF3D7_0503400	actin-depolymerizing factor 1	ADF1	52.4731	72.7675	64.7063	36.7218	67.7238	78.2335	1697.36	2039.97	2118.87	1342.25	1781.28	1434.85	3251.77	3775.94	3124.75	1395.74	3925.14	4366.2	63.7042	50.9582	65.9885	46.3882	34.9665	56.2971	52.7148	29.9928	51.4619	38.7196	215.5	168.883	567.261	339.147	640.195	308.618	839.914	786.734	863.413	634.979	1906.48	925.389	2146.28	1494.49
PF3D7_0503500	NA	NA	0.515434	0.739069	0.799348	0.989556	2.07635	1.39027	4.56426	3.9697	5.70794	5.71123	6.58246	8.31243	7.72625	6.0802	9.97095	2.21416	10.3779	11.0099	0.0949231	0.95036	0.129765	0.174149	0.374364	0.33904	1.53923	2.82282	2.67771	1.667	3.48066	3.5018	8.38768	6.92294	5.65468	6.77122	3.8417	6.56642	1.12519	4.54752	3.43598	3.28629	4.91992	6.12936
PF3D7_0503600	myosin B	MyoB	1.64078	2.6543	0.933005	1.14547	2.04584	1.67191	4.62298	3.05387	2.21302	1.98849	1.57718	2.34008	4.34609	4.64521	6.37213	3.26311	23.9225	29.3697	2.31662	2.8572	1.0327	2.67945	1.19171	0.989324	0.898299	2.24646	2.02049	2.14789	1.13641	0.655721	1.33502	0.829377	1.45459	1.5555	2.56232	1.01965	0.21708	2.96102	1.61376	2.67342	3.90165	1.94368
PF3D7_0503800	60S ribosomal protein L31	RPL31	1399.28	1331.87	1369.49	1250.83	1554.71	1433.43	1970.54	1724.7	1447.51	1589.12	1332.84	1443.65	1304.79	1626.68	1337.98	1503.6	1088.11	1046.87	1219.7	1477.71	1404.56	1543.25	1221.02	1522.49	1480.93	1650.64	2003.36	1771.18	1395.34	1355.29	1864.85	1675.86	1673.94	1637.82	1546.25	1491.9	863.296	1250.24	1537.48	1136.37	1201.6	1272.93
PF3D7_0503900	NA	NA	0.850617	0.875667	0.92341	0.80828	0.475915	0.594832	4.12758	5.60488	8.87631	7.21616	7.22252	5.44362	10.1561	5.46301	7.12633	1.73678	10.5646	7.42122	0.487358	0.203307	0.166561	0.111766	0.720778	0.435178	0.691492	0.582308	0.611023	0.534925	2.97842	3.43718	5.11389	4.58632	5.71852	4.56964	3.80395	5.13926	4.46405	4.64308	2.96429	3.93693	3.72253	7.8674
PF3D7_0504000	cation transporting P-ATPase	ATPase3	3.45505	2.99095	3.26768	2.49429	4.66575	4.1513	28.8356	30.9034	37.5367	38.1611	36.872	30.0308	49.0393	32.9388	45.1105	12.3308	44.4381	37.4537	1.92332	1.57652	0.945618	1.14525	2.16248	2.68155	2.95462	3.11781	2.89786	3.04752	12.9755	10.7272	25.1199	15.7975	26.9229	18.7347	25.1664	30.2589	12.1447	25.7541	18.2408	23.753	20.9683	36.1884
PF3D7_0504100	NA	NA	2.11696	0.980687	0.459625	1.03454	0.426394	3.19762	10.1399	14.8367	19.5661	13.8542	18.3141	28.7754	26.2274	19.5782	33.227	9.90223	25.3781	25.1106	0	0	0.746147	0	1.0763	1.46211	3.0977	1.44921	2.39507	0.342331	4.10539	5.92217	17.4831	8.3466	8.86757	12.0416	10.0982	13.3531	22.9386	33.2796	15.5464	28.3442	25.3117	23.901
PF3D7_0504200	ATP-dependent RNA helicase DDX27, putative	DDX27	0.872037	1.92368	0.946664	1.36978	2.88558	2.82255	40.3652	53.8969	68.1559	71.2612	54.7846	44.1992	62.9959	49.5823	49.6495	17.8977	74.671	69.4095	0.642382	0.535955	0.219542	0.147317	2.21679	0.860406	2.47393	1.02338	1.81211	1.30943	17.0623	10.2808	29.9778	26.0699	31.4547	24.8014	29.898	45.5214	28.2087	33.048	31.067	36.1393	35.6607	54.3528
PF3D7_0504300	NA	NA	0	0	0	0	0	0	1.56937	1.12607	0	1.35007	1.60622	1.28324	0.704154	0.459933	1.28565	0	0.902331	0.465274	0	0	0	0.329336	0	0	0	0	0	0	0	0	0.793102	0	0	0.528047	1.66059	0.302874	1.93442	3.12723	0.213043	0.414315	0	1.06587
PF3D7_0504400	NA	NA	0.331545	0.639955	0.629857	0.405056	1.9199	2.92129	29.6592	27.0346	29.6548	37.5689	51.5088	70.7502	60.1465	39.8335	65.3027	21.7392	46.4593	42.8578	0.106851	0.0891486	0.0730355	0	0.316055	0.095411	0.952957	0.851125	1.8755	0.804207	6.63053	3.94184	13.2184	11.1866	12.9234	9.50799	30.2712	22.0846	26.9437	35.1348	35.4438	31.6902	35.8523	40.2872
PF3D7_0504500	NA	NA	0.454073	0.350584	0	0	0	0	0	0.305997	0.676903	0.825451	0.654707	0.261531	1.14808	3.37451	0.698722	0	1.47119	0.18965	0.29268	0	0.400108	0.26848	0.288572	0	0.237298	0.310846	0.183473	0.183569	0	0.635131	0	0	0	0	1.01531	0	0	0	0.347353	0.337757	0.479045	1.5206
PF3D7_0504600	2-oxoisovalerate dehydrogenase subunit beta, mitochondrial, putative	BCKDHB	2.62459	1.13986	2.8492	3.00611	0.991198	1.65183	26.3444	19.0135	20.7855	19.6812	46.8304	63.3013	139.564	155.227	165.586	82.758	155.723	167.581	0.42293	1.05858	2.31266	1.93981	0.416995	0.566471	0.685803	0.67377	0.662808	1.06105	0.795285	0.688336	1.16785	0.995004	2.67213	0.622045	17.6057	7.84935	21.6483	14.9659	50.068	10.4935	96.2203	50.538
PF3D7_0504700	centrosomal protein CEP120, putative	CEP120	1.8932	6.19683	5.67354	0.228038	0.402806	0.234946	20.3225	21.9943	24.8438	7.40026	8.49671	1.56651	31.1476	39.9408	10.2168	3.78632	60.821	36.0167	1.78746	0.200755	0.0234957	0.346854	0.54227	0.828736	0.445918	0.273809	0.366321	0.258715	4.13684	4.66213	6.11279	4.56918	5.08826	3.53904	1.74892	18.0951	0.148169	2.99415	1.24426	3.17348	3.16944	32.8349
PF3D7_0504800	NA	NA	0.133324	0.145828	0.156794	0.0271474	0.12308	0.0699244	7.10598	6.73846	7.70157	6.0457	8.23399	4.40262	25.7035	20.0915	19.9173	6.14349	29.5897	22.9605	0.0572905	0.167296	0.0685291	0.0394152	0.0847298	0.0511565	0.0232249	0.0532406	0.0269354	0.0449158	0.646381	0.233107	0.99665	0.758161	1.38324	0.695168	4.81946	2.85153	4.02833	4.61598	3.97756	5.28913	13.1826	8.3448
PF3D7_0504900	NA	NA	1.44883	2.23725	1.57282	0.442518	1.82388	1.82369	52.0476	68.3453	68.5746	39.0682	77.2933	34.2136	239.026	299.688	219.601	108.311	244.686	252.337	2.33467	0.389574	1.27664	0	1.84153	0.41694	0	1.48775	0.585417	0.878584	3.51213	1.51991	11.3464	3.84486	10.5363	1.71692	14.0382	22.4529	8.55395	10.6764	62.3429	21.554	115.657	117.831
PF3D7_0505000	NA	NA	4.61122	6.30768	6.60588	2.1094	4.15619	3.41896	6.02158	5.64738	4.99079	4.2615	2.85378	2.98335	1.78345	2.12116	1.26362	3.48232	1.70551	1.38949	6.27019	3.23847	3.63646	2.58954	3.61297	5.28377	3.47718	4.06481	3.11386	4.69877	7.65623	7.56907	7.73514	6.92875	6.61492	7.16616	2.85623	7.67108	0.555757	2.86676	1.43353	3.35169	1.49573	6.72882
PF3D7_0505100	trafficking protein particle complex subunit 8, putative	TRS85	8.07443	8.48197	9.11109	5.72431	8.75013	7.90179	21.0198	21.3974	28.4815	24.202	27.0557	18.6024	47.933	32.98	38.9544	15.9206	57.2964	46.1685	10.1158	6.50723	6.03255	6.32074	7.80559	8.40434	8.27295	7.62954	8.45507	9.45257	12.0472	12.9484	14.9948	13.1066	16.5142	14.2098	17.122	21.2479	6.28775	15.1324	11.8662	14.1777	17.7248	26.3541
PF3D7_0505200	actin-like protein, putative	ALP2b	6.97476	6.32538	5.16794	7.84492	15.3863	9.33676	21.5233	22.5314	21.7853	26.4319	34.799	38.6418	28.8318	23.9515	33.9016	12.9464	34.2559	24.1371	2.28352	3.81039	3.80456	4.05851	5.91013	3.69574	7.75284	6.21472	11.8097	6.71356	11.8084	12.0787	20.1778	21.825	25.6348	23.5102	44.8887	20.2273	33.6815	43.9766	26.1693	36.2343	32.3144	29.7656
PF3D7_0505300	NA	NA	0	0.0790532	0	0.250182	0	0	0.576973	1.51799	3.20533	0.372262	2.36208	1.2974	5.8248	4.56551	6.45975	0.342094	6.63479	4.44747	0.263985	0.110125	0	0	0	0	0	0.140185	0	0	0	0	0.145791	0	0.238272	0	0.305255	0.779455	0.426711	0	0.704923	1.3709	1.15221	1.27355
PF3D7_0505400	NA	NA	0.422821	1.17524	0.91801	0.103314	0.596146	0.425774	11.4367	11.9674	14.4972	12.5032	17.4359	17.242	45.5419	30.8639	43.5923	11.019	49.1807	44.0079	0.436057	0	0.149028	0.700006	0.214969	0.0973424	0.441931	0.115781	0.341691	0.136748	3.48487	1.77425	7.70625	3.07766	6.88769	3.60761	6.05073	8.18495	9.98538	5.22259	7.95678	5.66119	17.724	14.7258
PF3D7_0505500	DNA mismatch repair protein MSH6, putative	MSH6	1.39146	1.03852	1.25878	1.13332	3.08291	3.73648	82.1347	80.2044	84.4931	93.9291	116.632	137.259	119.618	107.085	131.467	43.3135	93.9233	94.8844	1.07626	1.99545	1.18522	1.15182	1.06116	1.54833	1.98761	1.93686	2.21145	1.27506	13.0424	9.01782	25.2284	17.5135	31.4095	16.3573	79.3727	38.7392	58.6341	90.2969	111.588	76.9366	84.9799	84.5405
PF3D7_0505600	NA	NA	4.87789	5.64923	5.29532	4.58417	6.99081	5.9038	10.3078	12.643	15.1026	16.3706	17.583	16.857	17.314	8.05572	20.4972	5.32806	15.1964	14.4179	7.4975	8.27321	2.97565	4.65902	3.09999	3.02344	2.35308	3.33927	2.12257	3.48891	10.4601	7.61016	11.2198	10.242	14.4076	16.3631	11.1866	20.4032	2.60626	8.68999	4.73607	9.21046	5.93786	16.1555
PF3D7_0505700	NA	NA	33.5327	35.4094	33.1666	18.7044	33.361	27.2011	85.5093	97.9682	86.0406	67.7316	82.2426	52.0494	137.367	162.555	114.666	74.1252	134.655	124.039	37.2023	24.1898	28.0551	27.5574	22.9897	33.2191	26.7641	31.6276	35.8028	32.7542	39.9044	37.9966	45.046	35.8519	42.3278	34.2945	42.1094	56.9485	25.9735	32.614	48.6084	59.3591	78.3293	94.9557
PF3D7_0505800	small ubiquitin-related modifier	SUMO	1719.8	1695.24	1620.47	2070.03	2119.37	2064.02	2590.62	2593.87	2598.9	2474.49	3557.63	3800.66	3547.52	3675.25	3774.84	2486.43	3408.2	3114.69	1434.04	1865.08	1502.28	1769.61	1547.97	1448.33	1930.46	1918.04	1913.74	1699.54	1667.13	1621.92	1971.76	1925.86	1905.07	1727.46	3231.37	2272.45	5095.38	4464.71	3719.45	3917.13	4076.45	3013.18
PF3D7_0505900	mediator of RNA polymerase II transcription subunit 11, putative	MED11	97.6937	95.2374	81.4152	98.8593	141.616	127.317	410.8	352.451	265.527	227.227	268.915	312.601	268.84	435.941	299.9	230.792	198.229	192.475	67.4223	77.4793	75.2139	75.851	69.6118	69.2909	114.486	110.788	150.719	120.479	116.616	116.634	189.689	146.649	169.935	132.376	254.482	220.538	328.319	389.903	362.341	350.863	290.807	399.385
PF3D7_0506000	NA	NA	11.1625	9.79364	12.1177	9.6082	10.7306	15.3279	14.2959	16.7543	21.9349	26.7486	27.0683	33.315	35.9204	16.3397	28.888	12.7143	32.4675	17.1652	14.3899	18.2816	13.189	12.9001	12.8981	16.3535	17.7656	11.4623	12.5059	14.3585	15.9894	12.0649	14.4492	10.0024	9.74116	16.114	25.3374	20.1405	10.5728	21.0091	23.6763	20.7577	16.9508	16.2631
PF3D7_0506100	NA	NA	40.6539	40.5925	51.765	37.3442	44.944	41.1688	62.0091	89.399	110.272	99.6501	84.6201	76.0556	86.173	63.1006	73.8464	43.4042	85.6664	79.9193	59.107	68.7114	49.02	52.4126	33.4125	35.1857	30.9899	31.8063	31.6182	32.6233	69.281	61.1399	113.162	84.8253	103.854	99.685	107.078	103.383	105.733	114.983	44.6611	130.964	72.2353	100.315
PF3D7_0506200	TATA-box-binding protein	TBP	7.06859	6.78508	4.14784	8.40245	4.23274	5.29038	6.99756	7.2096	9.68301	12.9656	14.5992	14.5245	9.66065	6.31006	9.40718	8.93616	8.66568	12.7667	7.1421	15.6162	11.1103	11.7477	5.82775	7.69687	5.39129	7.97774	6.63859	8.65012	9.95683	7.48215	6.8006	6.08378	9.55847	9.2368	11.9608	8.93386	3.18472	5.63115	6.72255	7.38947	9.00254	9.87064
PF3D7_0506300	NA	NA	0	0	0.50018	0	1.39205	0.966602	29.642	30.0148	29.3059	35.1788	24.5804	16.6303	33.3955	34.7486	23.3969	7.18397	20.8996	25.1453	0.989946	0	0	0.181619	0	0	0	0.210278	0.744684	0.124179	5.95684	4.08165	13.5585	6.52118	13.5815	8.73607	13.7365	16.0345	16.8551	17.8924	14.0985	20.5634	22.1441	37.7658
PF3D7_0506500	NA	NA	4.40728	4.4601	5.36541	0.442296	1.6803	1.18877	16.6087	17.9475	17.2934	11.1785	11.3703	4.04338	22.028	21.6016	14.1208	6.62636	26.6721	19.3937	0.669612	0.118507	0.374479	0.335044	1.26041	1.35891	1.74388	1.4439	1.79353	1.95991	8.45158	7.92597	12.4837	12.6984	12.7837	11.4901	5.56085	15.7999	1.09331	4.81633	2.20348	7.28252	7.66087	18.991
PF3D7_0506700	NA	NA	16.9646	14.8682	18.7482	13.9107	12.4673	12.6969	21.5309	21.5258	20.3913	21.5785	33.0547	42.1651	60.1859	57.9263	63.1457	28.7234	62.2691	69.8975	7.5854	7.15059	6.39684	7.68116	9.13015	10.1159	13.6579	11.0381	14.4505	13.5931	16.0235	19.988	18.9329	17.8458	20.2728	21.0816	10.7078	23.1865	11.9958	9.43888	17.4786	8.63999	27.6794	28.0765
PF3D7_0506800	transcription factor 25, putative	TCF25	21.9654	27.7798	29.6236	11.4422	17.1676	13.061	31.0393	30.4221	26.4167	23.0274	17.487	11.1766	33.3054	41.0602	26.2314	18.2347	36.8937	32.0814	26.4922	17.1027	18.3456	16.7324	15.0728	26.7582	19.0144	18.9576	18.2952	20.6474	27.7666	24.5038	27.3428	24.8286	22.8141	27.0837	13.6597	28.0647	10.7641	12.1054	9.74157	16.3387	15.4015	28.1079
PF3D7_0506900	rhomboid protease ROM4	ROM4	5.85396	6.81148	5.28085	4.33144	4.5669	3.21726	13.9385	11.8904	8.48088	13.4896	22.7063	30.9625	127.582	145.56	163.032	56.748	202.357	192.086	2.97609	4.87737	3.34195	3.99753	2.30554	2.27781	3.96412	6.82961	6.12993	5.59982	2.29848	3.9211	12.914	10.5025	8.53827	7.19117	7.49723	8.42866	19.357	16.3176	15.8941	14.2285	91.5076	22.1676
PF3D7_0507000	NA	NA	0.591152	0	0	1.44445	1.19068	1.4882	15.8232	12.748	34.3688	19.3436	30.6848	45.6247	38.8613	24.4068	41.8442	8.88798	26.8146	22.715	3.04829	3.17907	0.520895	1.39812	0	2.72191	0	3.23749	2.38861	2.38986	2.86603	1.65374	5.89215	16.136	16.5082	8.96683	22.0302	13.5007	33.6699	21.5734	11.7576	29.0216	13.7206	15.2716
PF3D7_0507100	60S ribosomal protein L4	RPL4	2788.77	2797.85	2616.47	3101.06	3389.97	3380.89	3216.96	3183.47	2920.28	3028.44	3232.63	3688.31	3005.07	3120.62	3099.13	3297.19	2264.07	2772.92	2622.79	2871.05	2709.01	3037.59	3070.24	2820.8	2800.67	2855.34	2802.82	2655.73	2901.58	3036.41	3630.46	3720.65	3526.28	3328.43	3900.24	2949.16	4122.57	3785.62	3235.83	3540.81	3708.16	3087.39
PF3D7_0507200	subtilisin-like protease 3	SUB3	0.0813793	0.188496	0	0	0.0819562	0.102435	0.343936	0	0.121315	0.394501	1.64272	1.78112	3.90943	2.68792	8.26488	1.22354	5.0097	4.14668	0.209817	0.0875277	0	0	0	0.374705	0.0850573	0	0	0.0657987	0	0	0	0	0	0	0.363928	0	0.226101	0.22845	0.249012	0.121066	2.46117	0.233591
PF3D7_0507300	subtilisin-like ookinete protein SOPT	SOPT	0.280367	0.595287	0.22827	0.256898	0.141177	0.176454	0.197487	0	0.104488	0.424729	0.606373	0.322964	0.70888	0.69453	0.970707	0.117092	1.70323	2.40053	0.542145	0.376937	0	0.24866	0.178179	0.403415	0.0732597	0.191932	0.113285	0	0	0.0980403	0.199606	0.10629	0.244668	0	0	0.45736	0	0.491908	0.214473	0.208548	0.197191	0.402382
PF3D7_0507400	subtilisin propeptide-like protein	SUB1-ProM	2.44138	2.19912	0.883436	2.48557	0.409781	2.56087	2.86613	4.38729	7.2789	3.94501	7.62692	6.09332	28.2919	20.8314	33.8109	9.51643	110.081	112.504	4.19634	9.19041	4.66099	2.88704	1.03436	1.87352	0.425287	1.39275	1.97293	1.64497	1.97272	0	0	1.85109	1.89379	1.54299	1.81964	2.21255	0.565253	0	0.933793	0.605331	12.8782	4.2825
PF3D7_0507500	subtilisin-like protease 1	SUB1	5.36584	6.60054	4.73901	5.22223	3.93842	3.77774	1.28123	0.980613	1.22019	1.1022	0.524526	1.67622	13.6819	14.7192	28.9691	8.20429	104.754	98.3051	4.2207	6.6516	5.20895	4.94721	2.31193	3.03598	1.99619	2.92619	2.42536	5.00032	0.992087	0.890474	0.258995	1.65497	1.37568	1.37951	1.08456	0.890159	1.26341	1.02123	1.66971	1.75889	16.5031	0.609122
PF3D7_0507600	protein CAF40, putative	CAF40	6.23742	4.66765	4.79193	7.62039	6.76484	6.88493	11.2205	11.8988	7.58173	10.1178	12.8676	19.7866	15.4067	12.0442	19.6391	9.13752	15.2346	15.3102	2.84522	7.12151	5.74978	3.51779	6.34241	8.28454	6.82022	5.78087	5.89361	7.75881	4.88498	6.71118	9.83786	7.42139	11.2772	7.55075	14.8766	7.72259	10.6645	18.5874	12.4058	15.2751	15.1856	9.82417
PF3D7_0507700	nuclear protein localization protein 4, putative	NPL4	20.1414	18.6429	18.9241	14.678	23.6055	20.9048	48.2868	44.7677	41.9654	36.2578	44.3257	45.7246	68.1984	67.3041	65.0678	27.3508	68.1201	49.49	9.71784	18.2426	7.68026	14.7644	11.6774	8.40621	11.2029	15.0784	14.4682	17.5232	24.4124	21.7473	32.2011	28.5783	37.4149	31.2659	30.3752	34.2014	28.6345	29.428	19.3721	27.8612	29.7404	36.2885
PF3D7_0507800	NA	NA	48.5139	59.4625	57.162	12.1247	34.1963	20.3897	79.4954	78.6518	69.9983	56.1609	38.0202	17.3843	62.731	69.4189	45.0566	33.9116	83.3756	67.0049	41.1299	11.6444	17.8147	17.1673	28.1993	32.5721	26.3605	25.1822	34.0021	35.1472	80.1747	72.5047	105.866	90.6697	92.4749	92.3737	33.8666	93.1218	8.48842	29.1834	14.3051	33.1886	21.5457	81.7318
PF3D7_0507900	NA	NA	40.8897	39.7705	42.6595	60.3362	32.6227	50.8007	22.4433	22.9031	29.2904	46.9808	52.8316	64.2301	39.6087	26.3097	50.6632	40.8077	20.6466	30.1639	75.9876	145.645	97.7958	68.4489	62.7718	62.9615	64.9391	60.7098	68.2333	44.2245	37.9749	31.9395	23.4402	30.6006	24.7156	27.6889	69.6603	25.4106	23.6065	47.7034	63.7776	41.8704	26.518	26.9289
PF3D7_0508000	6-cysteine protein	P38	1.43228	1.24407	1.16613	0.437461	0.540911	0.450713	4.28773	2.65431	1.86825	3.47161	14.1978	20.8298	79.2173	114.425	107.719	57.7239	114.854	119.343	0.923195	1.34793	0.315513	0.423432	0	0	0	0	0.144682	0.289514	0.216999	0.250423	0.509851	0	0.416635	0.169729	2.93568	0	11.192	1.25647	9.86086	0.266346	48.1016	6.852
PF3D7_0508100	SET domain protein, putative	SET9	1.15972	1.73304	1.34018	0.822688	0.527455	0.188358	2.84594	1.916	3.5692	3.26435	13.9165	9.91162	70.3734	59.6815	70.2885	21.9361	111.391	103.155	0.723399	0.684023	0.527425	0.486631	0.190199	0.645946	0.273707	0.2561	0.332552	0.574708	0.226716	0.36629	0.372876	0.397111	0.304703	0.0709317	1.33839	0.610268	3.27408	0.367566	4.86502	1.11309	24.4436	5.94181
PF3D7_0508200	NA	NA	1.58415	1.90261	2.8662	2.36548	2.48171	3.10181	25.5408	34.3989	43.5576	41.8105	59.6409	40.3492	127.282	110.461	130.822	39.9904	124.324	127.477	0.907636	0.567947	0.465294	0.624443	1.7898	0.810457	1.28781	3.73539	4.40954	4.83879	4.0535	3.44683	12.2808	6.67295	10.2403	6.50788	20.2034	11.8682	28.8533	10.8706	49.6852	17.2825	79.3546	31.83
PF3D7_0508300	triose phosphate transporter	TPT	31.2397	27.9281	24.592	35.9343	46.3638	57.7188	28.3104	31.7631	33.4978	59.779	62.955	89.6493	74.3673	38.0149	86.5844	32.6555	50.0162	47.0022	11.3044	43.228	20.7659	24.8442	27.6323	17.2441	25.7776	25.3879	29.9697	24.2247	34.5427	30.4085	31.9958	29.0886	29.1219	30.1356	46.2956	34.57	19.7954	83.594	55.3416	30.9831	31.4801	43.8738
PF3D7_0508400	NA	NA	0.682966	1.71375	1.29747	0.834394	2.57928	1.50442	19.0024	18.1798	15.0173	10.1393	3.93895	7.47393	4.31702	8.45926	3.94102	0.570467	5.532	2.70987	0.880431	0.183641	0.451347	0	0.217019	0.196541	2.67687	2.22081	8.27878	5.38402	4.75979	4.77646	10.9403	6.99078	8.74139	7.12216	3.56325	8.35585	2.84629	5.99136	2.74286	7.36623	1.20088	8.82171
PF3D7_0508500	ND6 protein, putative	ND6	6.92239	7.62732	6.65372	3.78814	4.16351	3.38856	12.1224	12.2131	10.212	11.5645	11.3327	9.4139	37.436	36.5988	34.2494	15.7804	63.5863	63.5669	7.68444	6.51472	6.62917	6.73642	5.74355	6.66801	3.99447	5.5616	3.5546	5.46102	5.68094	5.54735	3.62782	4.3739	5.59349	4.64851	7.41676	8.41704	8.58136	9.91878	7.53864	11.8001	23.7519	17.2943
PF3D7_0508600	NA	NA	87.441	84.804	82.2502	117.599	112.056	107.665	68.1377	72.5738	98.7403	106.838	132.948	135.857	113.254	90.5002	156.184	117.816	138.566	120.011	117.023	191.682	147.799	155.809	125.071	130	121.027	125.754	101.662	105.183	70.7517	77.3169	50.5489	56.0021	62.3764	53.3066	121.466	65.2964	172.443	180.254	152.735	178.29	157.52	83.8914
PF3D7_0508700	pre-mRNA-processing ATP-dependent RNA helicase PRP5, putative	PRP5	14.8775	16.5811	14.4626	9.85827	15.9988	11.0562	29.7809	31.607	34.1448	35.6533	33.7523	20.7688	47.2329	38.4512	41.8418	20.7817	52.4242	38.3008	17.6079	16.8152	15.9608	16.3011	15.598	20.3669	14.3639	16.2553	15.8606	17.5	22.0056	24.3957	29.9208	28.8701	34.7196	29.6429	27.6904	34.5989	20.6676	41.0566	14.5637	50.7057	31.5688	41.3372
PF3D7_0508800	single-stranded DNA-binding protein	SSB	9.23441	15.2781	10.7407	9.40157	17.4926	11.3469	56.9928	55.1182	55.7198	58.888	63.7203	97.2563	133.697	137.98	136.346	49.9529	157.077	125.624	3.11781	4.02013	2.71231	1.04001	2.7946	3.03708	8.04314	6.77317	11.7268	8.8886	22.9182	17.8371	47.5861	39.3428	45.0258	36.4769	38.6743	45.9093	41.5392	29.0091	29.4336	30.0924	60.7731	49.0158
PF3D7_0508900	protein AAP6	AAP6	3.15809	8.9045	5.94537	0.122098	0.644147	0.553507	11.3479	10.695	13.2893	6.00749	15.3897	3.47673	157.095	156.564	72.8021	23.7076	393.583	304.409	2.21596	0.10749	0.528372	0.283639	0.431892	0.529188	0.271587	0.396812	0.290748	0.484833	1.62317	1.76135	3.27297	1.97017	3.32577	2.9371	2.94973	3.52145	0.721938	1.37471	2.21708	2.94382	33.3177	13.9226
PF3D7_0509000	alpha-soluble NSF attachment protein, putative	alphaSNAP	49.8782	45.7917	46.8664	40.7102	42.0005	37.1951	131.972	148.856	136.526	106.166	128.423	134.708	173.006	210.431	172.208	109.232	180.617	184.339	39.4442	32.9093	34.5324	47.8308	33.2968	43.1819	44.4659	52.3656	52.6709	49.6483	49.7865	44.2637	71.3195	66.7385	66.3272	55.6304	56.8571	93.2173	57.9356	60.8907	114.466	50.5077	98.0199	122.918
PF3D7_0509100	structural maintenance of chromosomes protein 4, putative	SMC4	0.586655	0.990825	0.636859	0.0895912	0.701591	0.507678	54.805	62.9091	71.4396	46.2581	43.8796	17.486	136.834	127.222	68.1566	25.1748	182.413	145.606	0.803542	0.354925	0.323083	0.390231	0.372831	0.337651	0.4982	0.602411	0.859285	0.830088	7.24389	5.69276	16.7589	11.4539	19.5397	10.9842	21.4254	38.0409	9.27029	18.7846	10.2657	36.3284	51.6281	73.7071
PF3D7_0509200	leucine-rich repeat protein	LRR2	0	0.142716	0	0	0	0	0.520808	0.249131	0.275553	1.12008	1.86563	1.27757	1.63576	1.22106	1.42218	0.617585	1.49723	1.23524	0	0	0	0	0	0	0	0	0	0	0	1.0342	0	0.280303	0.645231	0.175237	2.20432	1.40716	1.54069	1.29725	1.1312	1.37494	0.910044	1.94544
PF3D7_0509300	NA	NA	14.5851	21.6878	29.3209	13.8592	25.0249	25.1583	101.214	128.139	120.792	81.1788	90.3496	61.604	88.0951	104.377	73.1489	34.2919	106.763	87.0884	55.0137	16.2681	19.5156	15.3312	17.8517	16.789	44.6038	37.7195	65.4809	48.9179	49.7602	62.7137	66.1488	40.9581	83.5963	62.9901	53.9513	73.4339	63.0355	48.5259	70.2492	79.5593	79.7857	81.6628
PF3D7_0509400	RNA polymerase I	RNAPI	42.4125	44.696	43.5917	22.3758	33.1876	26.3006	54.3592	52.1798	51.3048	47.128	34.1872	22.9052	20.409	21.336	13.5622	30.5603	20.0587	19.8958	49.3545	35.86	34.2465	34.3939	40.3831	39.5915	34.6681	37.3341	34.5002	40.5494	65.2933	63.3532	72.3892	68.423	69.0092	70.8584	36.434	69.6428	9.28722	24.4398	18.4175	25.6478	15.4063	46.7299
PF3D7_0509500	NA	NA	0.422441	0.217441	0.611457	0.860176	3.11986	1.06348	3.57075	5.31404	7.13714	7.50882	12.182	12.3278	15.1314	8.13927	13.8677	3.05809	12.0902	9.76291	1.27069	1.21162	0.124078	0.999109	0.17898	0.162091	0.588712	1.25316	0.113794	0.455416	1.19472	1.77266	2.20554	2.13535	3.2769	2.53641	10.4953	1.9908	4.89039	6.91767	5.92452	7.1225	6.23942	6.46705
PF3D7_0509600	asparagine--tRNA ligase	AsnRS	13.3471	15.2569	13.9248	12.071	26.3597	19.746	54.2115	51.1638	53.7478	55.9845	52.1104	64.0956	49.1958	48.2357	43.744	26.2064	44.2273	44.5968	5.9216	7.83028	8.62971	8.19924	11.2364	12.4707	15.3997	17.3248	20.4515	19.6213	32.1447	26.0641	50.8441	41.7943	43.1618	39.7679	41.7301	50.0496	45.9927	55.9592	33.9455	56.8609	37.3668	54.399
PF3D7_0509700	NA	NA	0	0.122173	0	0	1.11551	0	2.67506	4.69196	1.65123	2.10949	2.28156	3.09874	3.00066	1.30663	3.40891	0.793036	1.79441	2.6436	0	0	0	0	0	0	0.165389	0.108325	0.895126	0	0	0.442667	1.35188	0.71987	1.10471	0.600053	1.88703	0.860437	2.19821	2.44315	2.54199	0.941626	2.33716	2.57382
PF3D7_0509800	phosphatidylinositol 4-kinase beta	PI4KB	15.1433	15.5686	15.2183	14.4278	19.3769	14.2581	17.429	18.4611	17.9041	19.4722	20.8499	18.971	29.1479	25.9376	28.6798	19.1915	35.3991	29.6277	17.7611	17.5403	14.4762	14.6776	14.9591	15.7208	14.1484	15.0688	14.1853	14.9722	20.9349	18.8219	18.9315	23.9385	21.6396	22.3912	18.6218	19.7014	6.75188	17.647	14.319	18.1661	14.5494	19.0626
PF3D7_0509900	NA	NA	0.795709	0	0.215951	0.243034	1.6027	0.500792	10.0888	8.31147	14.2343	5.78602	7.1706	7.56197	12.8257	17.7403	10.4076	4.32016	16.4353	14.1244	0	0	0.35057	0.70572	0	0	0.623754	0.95326	1.28606	0.643365	0.964441	1.11299	2.83251	1.20664	3.70342	1.13153	4.15147	3.02874	1.93442	2.51295	4.56521	2.9594	6.15611	7.423
PF3D7_0510000	NA	NA	0.160056	0.185366	0.0868768	0.0977722	0.322382	0.100734	12.0634	12.2962	22.19	12.8024	15.3467	8.57339	15.8839	14.5381	10.5906	4.27814	22.8176	20.1218	0.515834	0.344298	0.070517	0.28391	0	0.460605	0.334581	0.0547851	0.51738	0.905888	1.26098	1.4552	3.53249	2.91258	4.84212	2.35193	4.65251	11.8365	7.00394	7.63834	7.04022	11.9056	10.5818	20.0616
PF3D7_0510100	NA	NA	0.24709	0.553248	0.402353	0.2415	0.373263	0.373224	25.4109	25.8428	28.289	28.0289	21.5542	11.983	39.8898	26.4017	34.9421	7.71896	45.9927	38.2668	0.0318531	0.159455	0.0653172	0.146097	0.157031	0.0853281	0.284083	0.219896	0.399358	0.159827	4.10296	4.25107	10.7308	7.45645	13.2827	7.84731	20.4054	19.052	6.69344	22.8554	6.36988	24.0037	16.6313	30.2375
PF3D7_0510200	peptidyl-prolyl cis-trans isomerase	CYP87	20.4406	23.8022	23.9177	21.6976	25.31	27.8381	55.2321	71.358	70.8087	62.2355	52.4221	43.7148	61.7429	59.3517	48.0829	35.1268	69.0772	64.0996	27.5385	29.8238	23.8428	24.6672	18.5273	18.5148	19.4381	22.7674	18.2109	19.9815	36.2487	34.9186	48.9062	45.987	49.1273	41.9331	44.3314	61.8604	39.5677	60.4384	37.8736	58.2008	43.1883	80.8751
PF3D7_0510300	stripes inner membrane complex protein, putative	SIP	1.26846	0.391746	0.550806	0.929826	1.78844	0	5.36094	2.39347	1.51275	2.7671	1.09736	0.292237	0.320718	0.837935	0	0	0	0.423832	0.654086	0.27286	0.447084	0	1.28981	0.292027	0	0.868355	0.410029	0.615365	0.307489	0.709701	1.80615	0.769416	1.18075	1.68355	0	1.37949	0	1.06826	2.13475	0.754826	0	3.15553
PF3D7_0510400	NA	NA	3.70276	3.95841	2.47362	1.7399	3.44216	4.30226	5.01573	5.37443	7.64285	9.66528	5.54418	6.39799	3.06067	1.88154	3.28717	1.90329	4.8449	3.21198	6.79283	7.65868	4.01563	3.87344	4.34433	2.13113	1.33965	2.6323	1.38105	1.61207	3.9701	5.7768	10.3419	7.12672	7.29111	9.58585	8.06707	10.6866	4.15461	5.39713	2.72356	6.99157	2.60426	10.0833
PF3D7_0510500	topoisomerase I	TopoI	28.8693	31.1018	30.3681	15.858	29.5247	20.9394	61.4785	64.548	68.3914	62.3805	60.2331	36.8646	119.58	110.754	99.8673	38.1337	133.899	105.061	13.1748	6.9001	8.34796	9.9683	13.2743	12.2794	18.4007	17.6694	24.2944	24.9706	49.3673	42.5719	64.2625	58.5974	64.1444	63.1535	39.1425	69.4447	14.1973	36.1236	19.8587	43.3921	43.7573	73.8017
PF3D7_0510800	NA	NA	0.0974527	0.150484	0	0	0	0	0.274578	0.91942	0.145276	0.47242	0.140513	0.898071	0.615998	1.12659	0.899754	0	0.473619	0.325619	0	0.104815	0	0	0.247732	0	0	0.133427	0	0	0.236236	0	0	0	0.226784	0	0	0	0	0.273571	0.372743	0	0.137083	0.839183
PF3D7_0511000	translationally-controlled tumor protein homolog	TCTP	1107.88	998.553	980.819	1155.01	1063.63	1037.75	1048.03	1066.98	981.918	1291.89	1237.05	1988.79	1311.23	1090.8	1350.49	943.343	985.023	1002.74	573.441	975.68	710.41	759.962	856.194	626.95	948.142	938.241	1014.24	965.286	1031.06	923.872	1014.66	922.053	1104.26	997.456	1591.74	988.126	1920.65	1464.52	1497.12	1118.65	1507.42	965.903
PF3D7_0511100	NA	NA	9.39931	3.22537	7.9362	7.65556	2.62943	6.57289	2.20692	2.11138	7.00594	5.69561	3.76457	10.2258	10.5623	6.899	7.23177	4.3617	8.45935	11.3411	2.69265	4.49309	4.60124	4.32254	11.2832	9.01634	3.82049	3.21725	5.90783	1.26663	3.79749	2.9216	4.4612	3.16743	3.03796	3.96035	13.2328	4.54311	2.90163	5.1306	6.79075	4.66105	4.03994	2.49812
PF3D7_0511200	stearoyl-CoA desaturase	SCD	0.13192	0.916685	0.429629	0.32234	0.597849	0.498156	11.2437	16.8022	22.8123	14.7886	27.0098	21.9587	75.3815	61.4374	79.7778	21.2667	87.6211	82.482	0.170062	0.212831	0.523088	0.546004	0.503027	0.075927	0.0689412	0.270927	0.213215	0.479984	0.639577	0.276783	2.53584	0.900217	2.30246	1.43823	9.73411	7.38853	11.0873	5.46236	10.7475	6.28015	32.2886	22.5304
PF3D7_0511300	NA	NA	1.23733	1.56947	1.58308	2.21353	1.73565	2.00246	8.27985	6.01551	8.82742	10.4968	14.0176	19.9545	9.94407	6.56816	11.22	3.61732	7.15883	6.27529	1.53812	2.94681	1.7133	1.88126	1.85354	2.13645	1.98607	1.45208	1.67843	1.14336	5.249	3.8941	6.85854	5.629	7.19856	6.61921	14.7556	6.63204	8.65579	17.3674	6.11861	13.214	7.33499	9.3019
PF3D7_0511400	NA	NA	0.656148	0.886555	0.890374	0.400815	0.660799	0.412957	6.93274	3.31631	8.31421	6.36159	1.89214	0.944796	1.659	1.35452	1.76692	0.274033	0	1.09619	0.42293	0.17643	0.289083	0.581942	0.208497	0.377648	0	0.44918	1.06049	1.85683	3.77761	2.06501	8.87568	5.47252	8.589	7.15352	1.71167	6.77898	2.27877	3.45366	1.38032	7.07698	1.26909	6.12106
PF3D7_0511500	NA	NA	31.001	37.0139	38.8461	4.97589	14.1114	10.3551	47.8495	44.6366	54.7274	36.4613	28.3117	7.70462	48.6704	38.9483	28.6051	27.3094	63.367	39.4213	50.3768	9.82612	22.1364	17.299	26.3191	33.3269	14.2939	18.4342	13.7643	22.1301	44.6626	47.2996	40.9054	36.5378	36.7454	33.1269	27.2556	50.4361	5.29457	21.7304	6.77908	30.6753	21.8433	35.5726
PF3D7_0511600	apical rhoptry neck protein	ARNP	1.79891	1.15743	1.95286	0.366295	0	0.377391	1.68951	3.63683	2.6817	3.27021	3.89065	2.41759	11.3709	8.41744	11.5339	3.50605	40.7992	26.0464	2.70554	2.25729	1.8493	0.709097	1.52432	1.38049	0.313369	0	1.45374	0.484833	2.54377	0.838737	2.56145	5.0012	2.09314	2.84236	2.68157	2.60848	5.83103	3.36663	0.917411	1.3381	11.1762	4.58985
PF3D7_0511700	EKC/KEOPS complex subunit CGI121	CGI121	8.00682	14.783	13.6049	14.4605	6.31063	13.584	9.31812	7.03794	22.8342	21.5168	30.6185	23.2588	14.0831	5.17425	20.3561	11.6312	18.6106	15.4122	7.18041	19.8445	8.28223	11.1151	7.52212	6.01089	4.36628	6.43451	3.09458	4.22208	20.2533	14.608	21.8103	12.1418	15.7974	17.8216	31.1361	18.9296	17.8934	21.9883	13.8478	17.6084	11.018	15.6549
PF3D7_0511800	inositol-3-phosphate synthase	INO1	165.925	161.055	149.879	146.152	234.797	188.908	237.983	227.82	158.879	160.042	238.493	318.557	284.921	358.691	330.709	257.982	208.729	227.629	95.6003	140.585	94.8235	104.231	123.221	133.293	194.75	162.724	223.144	208.522	145.246	163.561	140.694	133.032	116.176	131.772	134.477	136.181	65.3227	141.307	195.938	70.7247	92.2236	178.279
PF3D7_0511900	NA	NA	13.0296	11.516	7.81677	7.22618	10.2731	9.92678	3.50209	4.15922	5.62264	4.88269	3.21353	4.44351	2.27574	1.2741	2.50622	3.29365	1.94415	1.57531	8.72994	8.48217	4.38093	6.28487	7.40893	5.22972	3.13584	7.04187	3.94856	4.92095	14.1302	14.0285	7.93373	8.96933	7.6801	11.3772	7.66688	9.50883	1.78623	6.61755	1.37706	6.37626	2.83364	4.75703
PF3D7_0512000	prefoldin subunit 6	PFD6	150.911	168.123	193.303	99.5223	183.534	191.271	439.913	475.765	447.602	357.558	389.256	335.047	451.539	534.672	362.392	228.553	503.332	440.12	144.057	73.0127	108.589	104.358	116.814	154.48	277.804	180.166	240.955	210.26	343.04	302.386	431.993	399.096	435.036	403.461	386.087	429.892	471.516	362.807	395.861	490.964	441.088	455.658
PF3D7_0512100	NA	NA	3.40027	7.12582	5.27322	13.6495	7.33794	15.8972	29.4256	26.8424	52.8614	55.9259	65.8362	113.03	73.6905	37.7038	95.6761	20.287	62.1664	54.3721	1.2524	3.65717	0	2.29769	3.08705	1.67746	1.52312	2.32773	2.35528	1.57101	19.429	6.11498	22.1331	10.3126	25.4341	15.6572	85.4431	33.2809	131.586	90.6805	51.6506	77.3228	52.2716	35.7871
PF3D7_0512200	glutathione synthetase	GS	5.06264	5.01506	4.04414	5.36823	5.77192	8.41651	11.7075	10.4282	10.8222	18.2908	15.2878	19.1459	5.43412	2.99728	6.46744	3.67021	4.64233	3.75021	3.44791	5.65061	5.30265	4.29241	4.37082	4.83803	8.68596	6.47374	7.33333	3.32103	12.2724	9.21908	14.8253	15.644	17.7832	16.6625	19.0803	15.2707	12.0754	19.0387	10.4492	18.4737	7.25578	16.8166
PF3D7_0512300	CDK-activating kinase assembly factor MAT1	MAT1	13.6848	14.0878	15.1166	16.719	18.3758	16.9233	15.5584	13.2669	17.8951	22.4042	24.2317	23.5077	27.0128	28.1511	31.0329	13.2355	20.2247	18.25	13.618	27.3717	12.6931	16.1829	11.2908	11.0545	13.2996	11.3405	14.9393	13.9766	19.2057	12.761	20.8531	13.1066	10.6154	12.9736	19.3258	17.4936	24.6806	17.1863	8.44827	17.1441	12.1578	18.6067
PF3D7_0512400	NA	NA	1.86653	2.67637	1.7368	2.93192	4.02806	2.34946	0	1.07815	0.3975	0	0.384466	0.921478	0	0	0.410313	0.44545	0	0.222737	2.4062	2.58114	1.6447	1.57661	2.03351	0.920817	0	2.55555	4.09418	2.15596	1.29276	1.11891	0.379676	1.21306	2.48208	1.76952	0	0.869957	0.740843	0	0.81591	0.79337	0.187541	1.02051
PF3D7_0512500	NA	NA	0.612832	1.12375	0.582117	0.935888	0.925764	0.771391	7.01467	9.3954	15.9875	13.74	6.51666	5.11807	10.459	5.81945	8.13353	1.91957	11.5411	9.98234	0.197505	0.0823916	0	0.271763	0.0973667	0.176359	0.0800662	0.576851	0.247621	0.371626	1.85696	1.17864	3.49042	1.51014	2.76313	2.32392	8.56432	6.66471	4.78876	4.08585	2.9886	7.86338	5.1184	11.2141
PF3D7_0512600	ras-related protein Rab-1B	RAB1b	201.392	188.227	221.334	197.293	172.365	173.053	308.75	299.165	328.106	371.773	517.375	561.658	815.426	733.147	879.805	463.511	796.442	763.275	198.533	277.633	207.674	212.717	207.238	193.066	189.314	182.685	221.449	208.71	163.235	152.185	143.824	135.207	145.459	132.701	273.718	206.813	275.872	237.605	461.938	225.4	441.379	346.009
PF3D7_0512700	orotate phosphoribosyltransferase	OPRT	52.2184	47.8659	51.6215	58.3669	60.8685	61.2538	105.494	90.1456	106.331	108.796	102.204	137.198	43.5414	45.871	41.7152	40.4617	37.4371	27.6566	23.7755	53.0567	38.7679	33.1088	36.9987	39.3905	42.2693	41.6798	52.9729	50.665	79.451	56.5672	102.196	82.8923	101.352	77.5218	158.33	94.7287	130.265	157.505	67.1426	131.237	48.7606	93.3342
PF3D7_0512800	NA	NA	9.63739	6.49976	7.69153	6.23614	9.62898	7.04838	20.7142	21.2037	14.7075	13.711	11.6438	10.6189	8.52369	11.8269	6.74086	7.3181	6.78805	7.1276	4.71419	3.40055	4.76627	4.59469	4.11545	7.23499	5.17583	5.73695	8.40384	7.42266	7.75657	10.2833	14.3192	14.0946	12.9866	10.6893	8.23355	15.0378	5.34465	12.4578	9.38297	12.6373	8.11784	17.2758
PF3D7_0512900	AKAP-like protein	AKAL	1.649	1.81882	3.06878	2.59023	4.03311	2.07565	6.30549	10.4775	8.07703	12.2763	7.13286	16.0104	13.997	10.1151	9.78736	5.50951	10.3039	8.85507	2.73314	7.09435	2.4909	2.50716	2.99421	0.542336	1.23109	1.61266	0.951852	1.33329	5.42498	4.28355	5.03142	2.85783	7.40075	6.47652	10.8859	11.0162	5.23603	7.27433	3.60412	8.41091	5.30191	11.7205
PF3D7_0513000	NA	NA	7.19454	6.62993	6.29857	5.10371	6.54435	8.76386	29.0987	25.3366	33.2134	25.3138	31.1204	25.3975	37.2615	30.6622	32.8554	13.182	31.5816	29.6612	3.88939	7.7381	4.29449	6.58672	6.78466	7.48022	4.60885	5.24293	5.6265	5.62945	13.7835	16.2311	13.8793	19.0046	24.3037	13.8612	19.7195	26.7539	19.6666	20.8482	15.6232	17.2631	19.0979	29.7554
PF3D7_0513100	NA	NA	7.70843	6.91151	3.23926	3.64551	11.0186	6.88589	21.7189	24.8004	28.172	28.026	34.4189	43.2522	69.4723	55.4384	96.8062	25.3394	67.272	68.5448	7.37274	9.09316	9.85979	7.6453	4.74083	8.01452	11.6954	5.10675	9.84638	8.84627	6.63053	5.91277	9.55971	6.78735	7.23324	7.77926	38.1787	12.7099	50.0877	33.855	54.0217	32.5534	79.5747	26.8846
PF3D7_0513200	NA	NA	16.323	19.6043	17.8921	5.23481	9.36092	7.79045	20.9194	25.7888	26.3272	21.0735	16.6709	8.09571	28.3451	21.9026	20.0941	14.0508	31.9521	26.0391	26.7707	10.7532	13.0846	12.7612	13.4856	15.3969	7.34558	10.0103	7.78632	11.7497	18.5753	19.4069	16.7537	13.3733	15.8801	16.1624	12.8757	23.1265	5.70039	12.6329	5.30681	16.4924	16.4075	23.7304
PF3D7_0513300	purine nucleoside phosphorylase	PNP	2489.93	2714.23	2296.52	2737.64	2314.67	2518.22	8257.48	8459.95	7676.92	6727.3	5578.17	4857.64	4525.37	5371.54	4006.28	5305.52	3233.12	4086.4	3136.28	2911.74	3569.21	4121.02	5242.71	3961.91	3225.45	3139.31	3668.82	3095.3	3652.07	3617.44	4189.9	3410.78	4460.91	3202.33	4457.01	5187.45	8545.31	7064.86	9190.22	5765.68	7941.94	9120.22
PF3D7_0513400	GTP-binding protein YihA1	YihA1	4.14836	5.22578	4.74039	5.86838	6.15671	9.06922	19.6854	20.3046	16.9249	29.3711	20.7773	34.2049	10.4887	10.4567	15.1187	12.4012	10.2573	7.84238	3.09608	7.04492	5.00204	5.93838	9.1579	5.78051	9.35631	4.78291	7.41052	3.7072	6.61583	6.10788	13.368	10.926	14.2266	12.0052	20.5042	14.4841	18.1984	31.5651	23.3828	16.8902	11.6707	27.784
PF3D7_0513500	mitochondrial import inner membrane translocase subunit TIM16, putative	PAM16	15.5402	18.9652	15.2375	33.6845	26.7571	41.0149	19.774	8.10771	25.4082	29.1615	28.1891	27.7181	22.1809	4.1394	15.4278	14.2366	14.6178	15.4936	23.2645	53.3779	18.5522	27.8618	19.7522	12.118	22.006	14.4133	14.989	12.9702	26.1267	17.5296	27.1241	28.887	31.4976	34.6927	70.9902	40.3428	36.2124	56.9937	14.5722	60.4072	11.9876	30.2173
PF3D7_0513600	NA	NA	20.1374	22.1491	21.4943	8.79634	18.524	13.4526	214.67	208.561	163.179	128.978	120.926	84.1696	183.039	251.002	142.471	69.2546	156.642	158.393	6.45366	4.53746	5.3034	4.98882	9.5804	7.64041	11.6408	12.3607	14.5461	12.4161	38.5203	32.1009	82.0155	52.0323	78.1471	50.2865	78.1476	107.603	63.2942	91.4271	69.0191	103.179	101.358	177.712
PF3D7_0513700	secreted ookinete protein, putative	PSOP12	0.340555	0.262938	0.0924246	0.312047	0.342969	0.857334	3.11848	2.98348	2.28455	3.50817	3.80549	2.84414	2.79844	1.82786	3.14425	0	2.89641	1.99132	0.439019	0.274713	0.0750202	0.10068	0.108215	0.0980037	0.177973	0.0582836	0	0.275353	0.103193	0.714522	0.848597	0.774643	1.0897	0.726423	1.64987	1.29627	0.827912	1.55352	2.2795	1.64657	0.598806	1.79213
PF3D7_0513800	ras-related protein Rab-1A	RAB1a	2.10882	0.930396	0	3.3125	5.76452	5.30888	119.259	151.451	154.939	161.741	189.387	218.282	183.952	173.138	248.013	85.0531	134.211	140.673	0.388363	0	0.796368	1.06876	1.91457	0.693564	3.14876	1.44364	1.70418	3.89731	18.6223	18.9623	44.183	23.7557	45.92	25.7042	231.724	59.9559	455.333	238.489	224.233	211.092	278.417	98.5798
PF3D7_0513900	NA	NA	0	0.1943	0.819573	0	0.760317	0.950298	19.1444	25.4383	28.1363	30.4986	17.7796	23.1911	25.4514	28.261	22.0729	6.30607	26.4992	20.8112	0	0.541336	0	0.297593	0	0	0	0.172276	0	0.406948	3.66023	0.352	8.5999	4.1978	13.1767	7.63441	15.0053	10.6736	27.618	12.0097	17.9033	19.8422	17.5226	24.0783
PF3D7_0514000	tubulin--tyrosine ligase, putative	TTL	0.297682	0.114918	0.323157	0	0	0	3.14526	2.60788	2.44071	1.80384	2.36068	3.94346	3.95146	2.70388	3.43552	2.98377	2.1701	1.98929	0.191875	0.160086	0	0.176011	0	0	0	0	0	0	0.180403	1.04095	0	0.225708	0.692742	0.28221	2.21872	1.45682	0.827069	2.92481	2.16333	2.4357	2.51242	2.42098
PF3D7_0514100	ATP-dependent DNA helicase UvrD	UvrD	0.391095	0.402612	0.37739	0.21236	0.743971	0.711076	5.26478	8.08241	10.883	10.1115	14.0975	12.5643	23.2378	16.8647	24.6074	7.18682	28.5107	21.3439	0.336115	0.280429	0.191452	0.154162	0.220932	0.150064	0.227095	0.475969	0.386286	0.281082	0.684707	1.39799	1.98	1.58152	3.236	1.44188	7.06067	4.91488	4.58788	8.11219	9.47392	7.69299	19.1326	8.52342
PF3D7_0514200	NA	NA	8.30201	10.646	9.40431	8.02599	6.54328	6.72434	11.2889	13.4272	16.1427	18.023	24.6692	26.0289	40.7038	31.7131	46.8787	20.502	52.2765	39.8002	12.8428	11.3363	9.54174	10.0736	9.72635	11.5509	9.05449	9.7852	6.94238	8.87221	10.0625	11.9153	10.2793	9.19576	10.0799	9.30774	15.8191	12.169	11.2321	15.4019	19.439	11.9211	28.0782	18.7877
PF3D7_0514300	NA	NA	3.21913	3.55677	4.33815	3.2548	6.09263	5.16982	16.4982	22.8157	21.5122	14.3273	15.6051	12.3394	24.3476	28.6898	18.3623	8.9011	26.3446	23.4131	1.28789	0.716347	0.391248	0.393803	1.552	2.49167	4.58285	4.10349	5.33745	4.93636	11.5035	11.0239	19.5202	13.214	17.8887	17.5217	12.824	21.7297	8.63551	11.8414	7.93959	13.4588	13.6237	25.3308
PF3D7_0514500	NA	NA	0.870307	0.447968	0	0.354424	0	1.46064	0.817379	1.17299	0.432466	1.05474	1.67314	2.00507	1.83373	0.958194	1.78562	0.969266	0.469964	0.969321	0.373979	0.31202	1.78937	0	0.368731	0.667877	0.606427	1.58877	0.703313	0.23456	0.703238	0.811556	0.826147	0.439921	1.68776	1.37512	3.02712	0.630987	3.62704	0.407191	2.88496	5.61052	0.612113	1.11028
PF3D7_0514600	NA	NA	67.4212	84.3088	78.3574	81.0779	83.3429	113.819	214.919	212.029	266.048	337.09	223.777	246.699	143.393	132.74	121.241	111.306	106.224	126.993	126.452	152.139	124.408	121.312	98.8013	114.435	108.328	105.522	124.994	115.867	151.9	142.752	240.942	234.951	256.573	214.31	251.059	225.43	137.368	218.584	258.888	243.869	147.651	203.392
PF3D7_0514700	NA	NA	0	0.0309933	0	0	0	0	0.452412	0.48693	0.41889	0.486493	0.231517	0	0.152243	0.066294	0	0.13412	0.195091	0.134128	0.155246	0.129525	0.0353715	0	0	0.092416	0	0	0.0648796	0.0973703	0	0.168446	0.400107	0.243492	0.140124	0.266391	0	0.261935	0	0.0563442	0.0921231	0.119438	0.0564665	0.230448
PF3D7_0514800	NA	NA	0.415899	0.428147	0.677235	0.423427	0.767886	0.959759	0.781211	1.02766	1.75665	1.76413	3.59799	2.47528	2.10312	1.48817	2.55992	1.15797	2.35814	2.66349	0.804221	1.49107	0.794019	0.901667	0.88104	0.398953	0.144899	0.711782	0.448129	0.336272	1.51227	1.35738	1.28309	1.99716	1.69373	1.9057	2.89317	2.48765	1.25181	2.43233	0.742352	3.40298	2.48637	1.32644
PF3D7_0514900	NA	NA	9.42072	8.04506	7.74767	11.5095	11.0688	15.8109	14.4782	8.65715	16.3844	14.8769	24.2853	26.4724	23.278	15.3224	29.4323	19.5531	26.1296	24.8005	13.2486	19.6509	11.9485	7.76453	8.16417	13.1445	10.5924	11.5303	8.65123	7.96329	11.7644	11.7796	10.7719	9.30748	13.785	11.9081	11.4898	12.8842	5.75039	11.2195	10.4823	8.49394	9.53725	12.8377
PF3D7_0515000	pre-mRNA-splicing factor CWC2, putative	CWC2	75.5045	73.1692	85.9721	40.5772	62.7346	50.6322	128.1	138.073	136.763	135.603	92.0523	42.4252	131.656	148.463	97.3322	70.6502	138.817	133.047	69.8377	28.4986	43.8987	42.418	45.0295	52.6749	50.297	47.6462	50.6385	65.5244	88.2055	86.9254	123.484	113.49	120.917	113.283	56.0009	131.397	25.0176	50.1406	44.66	67.4178	64.2134	120.475
PF3D7_0515100	rhomboid protease ROM9	ROM9	1.02515	0.395751	0.278219	0.626222	0.258103	0.645192	16.9694	21.0706	21.2041	16.6171	23.8346	25.5369	37.7457	29.8392	42.1976	14.7709	35.9133	33.0758	0.165193	0	0	0	0	0	0.26787	0.175447	0.517777	0.310828	2.32975	2.33011	4.01416	2.52617	5.36769	4.00895	14.5174	7.5254	9.9688	16.7273	27.4473	21.3512	27.1282	22.805
PF3D7_0515200	NA	NA	0.438196	0.338326	0	0	0.882605	0	1.23464	4.13418	5.87911	5.31059	6.94997	15.6479	14.4032	9.40772	10.1144	5.12423	18.4568	15.0075	0	1.41391	0.386118	0	0	2.01764	1.374	0	0.354116	0.354301	0	0.612924	0.623944	0	2.03947	0.830843	2.61282	2.38275	11.566	6.76563	8.04499	18.2531	8.32131	4.61192
PF3D7_0515300	phosphatidylinositol 3-kinase	PI3K	9.36701	10.8822	9.97736	6.52911	7.77739	7.35523	20.3939	23.0728	28.6278	29.3588	30.8222	25.3011	53.158	39.7646	57.8813	22.0742	54.086	51.5339	13.4759	10.3905	11.4104	9.86156	10.1144	11.7964	7.88753	10.5734	7.61714	10.7076	11.8516	13.061	10.4109	9.35089	13.0174	11.302	21.2291	17.372	18.8457	28.0675	20.6429	28.1323	38.8677	32.7027
PF3D7_0515400	NA	NA	1.31574	1.26983	1.42834	0.100467	0.331267	0.517551	0.695094	0.997504	0.735532	1.69423	0.592845	0.284183	8.42074	7.741	13.4133	3.29703	31.5727	25.7595	0.42404	0.884467	0.941986	0.486224	0.209045	0.378639	0.257851	0.168885	0	0.265958	0.299015	0.460095	0	0.124702	0	0.311839	0.245166	0.536588	0.114238	0.692545	0.377439	0.611686	5.43672	0.786811
PF3D7_0515500	gametogenesis essential protein 1, putative	GEP1	0	0	0	0	0	0.0820757	0.183719	0.263648	0.0972035	0.158047	0.564097	0.150224	0.659458	0	0.200673	0.653573	0.316896	0.108935	0	0	0	0	0.0828782	0	0	0	0	0	0	0	0	0	0	0	0.194398	0.0709122	0	0.0915226	0	0.0970041	0.321025	0.249552
PF3D7_0515600	gamete egress protein GEP, putative	GEP	0.0500896	0.0386735	0.163128	0	0.302668	0.189148	0.42339	0.742613	0.821374	1.3355	1.58888	2.42339	2.34296	1.81988	4.00801	1.00413	3.32694	3.26361	0	0.107748	0	0.118466	0	0.0576584	0	0.0685799	0	0	0.242845	0.210187	0.142644	0.0759575	0.233129	0.0949725	0.896001	0.544737	0.139167	0.913982	0.881294	0.670654	0.246607	4.64879
PF3D7_0515700	glideosome-associated protein 40, putative	GAP40	31.5367	35.2532	22.0298	29.6507	10.3566	9.66517	31.2929	35.2975	39.8588	44.2023	163.104	169.795	869.657	733.679	1251.61	417.577	1568.89	1592.98	19.4437	25.2183	21.6268	18.6468	13.071	12.9425	6.73572	6.57061	5.0971	7.20618	3.65622	4.02759	4.88096	4.15855	7.01989	4.02968	42.1052	11.482	88.3824	15.7815	161.531	23.6622	798.506	66.5146
PF3D7_0515800	NA	NA	5.89761	10.8145	8.00289	11.7085	11.1364	3.71175	28.0409	26.827	36.2661	25.016	23.3846	36.5158	32.6189	53.5687	52.1822	20.9361	31.0508	33.2534	8.55313	14.2722	5.84628	5.23063	6.55908	10.1832	11.5578	5.55134	7.74472	12.5172	11.6158	11.3427	12.5963	16.7687	8.57778	13.9777	20.8795	15.2328	6.14464	9.31269	15.2263	18.6442	11.9254	33.1516
PF3D7_0515900	NLI interacting factor-like phosphatase, putative	NIF2	1.90462	2.05875	2.27438	2.55961	3.83625	8.39093	7.24461	10.5248	11.0732	16.6194	20.0472	32.9099	21.4296	7.8636	32.532	7.3181	21.5984	17.5008	0.245531	1.02426	0.167826	0.675689	1.45251	1.31545	2.18977	1.04308	1.69308	2.00196	6.69466	3.4633	6.77993	3.46588	7.09166	5.05577	30.9468	6.83538	44.7152	29.6742	13.4042	22.9511	22.6389	14.2142
PF3D7_0516000	NA	NA	4.678	5.79675	5.14103	4.44517	7.56112	5.81565	36.4498	34.7162	39.8618	35.836	29.7279	24.6152	14.3832	11.8269	10.3089	7.13951	14.1275	12.3501	1.26567	0.807514	0.71245	1.09273	1.32132	1.79496	3.19925	2.33263	4.38712	4.76298	15.6099	13.6521	33.1403	24.1717	28.2909	22.2838	21.2643	37.9988	13.1576	26.1833	14.6234	32.6488	16.6946	40.9462
PF3D7_0516100	cation-transporting ATPase 1	ATPase1	0.0521967	0.120901	0.0283318	0.159424	0.07885	0	2.7575	3.06023	3.26808	3.76386	3.08566	2.88609	6.30175	4.09457	4.93965	0.915575	5.20034	4.94874	0.0336441	0.0280701	0	0	0.066344	0.0300419	0.109111	0.0535986	0.105453	0.0211016	0.411223	0.547572	0.706062	0.474916	1.15394	0.593805	1.28383	1.67457	1.84902	3.22361	1.89663	2.13542	2.20269	4.54469
PF3D7_0516200	40S ribosomal protein S11	RPS11	2823.5	2689.26	2648.03	3770.87	3567.17	4128.47	2585.58	2509.21	3148.37	3824.55	4415.84	5287.36	3563.22	2619.12	4045.35	3346.34	2771.55	3275.59	3010.1	4776.27	3479.62	3564.14	3513.85	3274.35	3645.27	3685.45	3033.32	3247.23	3112.44	3043.46	3096.42	3516.47	3273.8	3605.74	4254.37	3280.01	2903.54	4570.1	4548.44	3761.96	3033.15	3045.48
PF3D7_0516300	NA	NA	29.861	32.9868	34.112	26.7159	53.3905	43.8321	44.9151	34.7976	35.7488	37.0799	26.7604	29.1058	16.4939	19.8776	12.8659	25.326	16.8195	15.6569	42.9956	33.5005	23.6404	26.1851	22.072	28.7677	39.4694	48.1173	57.4695	56.7567	45.4362	52.3061	62.1428	55.7319	53.0263	62.8895	34.9253	50.5604	21.6984	35.0781	20.4531	36.0855	14.863	35.1642
PF3D7_0516400	phosducin-like protein 1, putative	PhLP1	3.1704	5.18363	3.23926	2.96197	4.13196	3.0517	26.2729	33.1789	42.2581	43.6212	43.2925	34.3726	59.1772	37.5749	61.4126	21.4969	75.8321	65.7407	7.45288	3.61052	5.42289	2.86699	2.60746	6.22557	5.26292	5.61743	6.0284	6.18234	16.2749	9.65172	22.8371	16.12	25.3887	19.0946	21.128	26.5691	10.8811	18.0618	25.1087	25.2473	23.4789	31.2266
PF3D7_0516500	major facilitator superfamily domain-containing protein, putative	MFS1	0.990146	1.31053	1.38199	0.864059	1.99433	1.60242	2.39125	1.7158	1.05432	1.54283	0.611848	2.60704	1.43056	3.0368	1.0883	0.472599	1.83318	1.41788	0	0.912818	0.249277	0.16727	0.359576	0.162823	1.33058	0.580994	1.02877	0.343104	1.37155	0.395702	1.20845	2.14499	1.48126	0.670488	0.632561	1.23064	1.96499	2.9781	1.94769	2.94604	0.696399	1.48872
PF3D7_0516600	sporozoite surface antigen MB2	MB2	2.48937	3.69386	3.378	2.23347	7.40353	5.28769	22.0829	23.8006	24.6433	24.2768	23.0501	13.845	35.9945	30.705	30.7646	10.5265	36.2949	33.8883	2.10598	2.63561	2.12497	1.70188	1.28541	2.46256	5.32572	6.52371	4.90355	6.44713	9.4289	10.1739	18.3322	16.0436	17.4697	16.6305	22.3808	21.6157	13.2384	19.1084	13.0325	30.0899	31.5426	29.7356
PF3D7_0516700	NA	NA	28.6281	27.8379	23.6785	24.8677	22.5346	23.1358	23.3771	19.5141	21.5837	25.7506	25.7561	29.187	51.7617	45.1825	62.2088	36.8306	57.9526	51.2046	29.8757	48.2847	28.6222	33.7983	27.8432	27.651	24.6647	31.0221	25.0723	25.5796	30.8813	27.2215	26.3723	25.3062	23.0821	28.8336	33.9156	19.58	17.7624	31.0772	19.1307	23.3577	34.98	24.7826
PF3D7_0516800	AP2 domain transcription factor AP2-O2, putative	ApiAP2	0.684832	1.13885	1.11516	0.289618	0.371369	0.232082	12.2452	11.2891	11.3477	7.82079	16.8622	8.95074	71.5254	68.5985	60.3509	20.9449	86.7484	65.9407	0.203732	0.226638	0.255302	0.436069	0.368266	0.333517	0.385422	0.37866	0.212856	0.298155	1.277	1.25264	2.17528	1.67758	2.02275	1.59812	4.90795	4.89831	1.86612	3.10554	4.85594	3.44827	17.3398	15.3227
PF3D7_0516900	60S ribosomal protein L2	RPL2	2706.23	2725.81	2583.63	3460.26	3353.09	4050.72	2958.46	3178.24	4064.34	4673.17	5011.46	5648.48	4474.72	3138.25	4878.44	3626.12	3342.13	4144.15	3194.04	4523.82	3748.05	3528.15	3855.35	3537.72	3414.48	3839.5	2942.27	3287.21	3544.9	3639.58	3817.14	4439.5	4381.37	4613.35	6462.34	4292.72	6819.51	6933.48	5620.85	6865.14	6532.3	4511.78
PF3D7_0517000	NA	NA	2393.62	2647.53	2589.85	2014.43	2482.43	2143.87	3342.82	3352.77	2375.27	1832.66	1615.95	1340.16	2184.68	3482.33	1906.98	2844.04	1807.04	2099.41	2535.31	1464.04	2470.03	2752.88	2139.41	3028.19	2590.18	2723.68	3238.12	3049.67	2540.66	2650.56	3374.92	3307.48	2769.3	2856.82	1585.69	2583.82	2148.96	1690.72	1998.53	1739.19	1951.12	2638.38
PF3D7_0517100	NA	NA	2.75871	1.11569	1.85392	1.60494	2.11677	1.98427	15.3605	12.3939	12.3375	14.8062	12.5012	15.7379	11.6252	7.81019	10.3094	5.70587	9.78944	8.88849	0.846746	0.847753	0.463018	1.08743	1.66973	3.02435	3.43261	4.31665	4.35258	3.71756	5.09516	2.93998	8.6044	5.57786	10.2412	6.84967	12.5328	10.8577	5.1098	12.9072	6.73297	12.8985	7.29916	12.3178
PF3D7_0517200	NA	NA	2.77178	2.29292	2.25674	2.90258	15.0538	10.3422	3.76536	1.86789	3.39414	3.47915	1.42732	2.39468	1.50175	1.47135	0.304656	1.32298	0.481101	0.661527	2.8075	3.7265	2.18068	2.92656	0.754938	1.93716	6.82877	7.65771	8.39976	8.88439	1.91974	4.15394	4.08767	3.90299	3.91624	3.66004	2.36103	1.72251	2.88788	7.08628	1.4388	6.62708	1.53173	2.65204
PF3D7_0517300	serine/arginine-rich splicing factor 1	SR1	2194.85	2097.03	1885.35	2498.94	1930.55	2180.79	1287.25	1443.37	1699.23	1834.79	2456.06	2744.14	2471.63	1959.98	2627.3	2844.93	2222.74	2338.12	3053.68	4283.84	3032.38	3483.47	3224.46	3067.36	2411.24	2575.67	2090.24	2359.23	1907.89	1987.47	1168.56	1312.21	1239.73	1383.01	1741.64	1613.18	1270.22	1610.81	2178.71	1443.83	2121.21	1967.69
PF3D7_0517400	FACT complex subunit SPT16, putative	FACT-L	27.0511	28.2149	27.1622	22.9265	30.0059	32.7378	104.819	107.751	120.16	138.384	147.392	149.232	157.464	123.964	179.591	62.8817	133.335	140.209	23.6255	25.1999	19.8232	21.0233	27.0601	22.6751	26.0944	29.9376	26.0287	26.0867	45.6231	40.754	63.5974	56.4978	70.485	58.677	124.571	82.7069	75.3866	117.913	108.756	118.608	97.7151	134.557
PF3D7_0517500	NA	NA	1.42074	0.981468	0.649399	1.18762	2.18387	2.54131	0.316027	0.302346	0.668825	0.634356	0.539079	0.516819	0.378126	0.246981	0.57532	1.12426	0.121136	0.0624622	1.06035	1.76936	2.04255	1.50323	0.665301	0.774673	1.79757	3.42969	2.71925	1.99516	0.634425	0.627552	1.38414	1.13392	0.870061	1.48868	0.891725	1.21981	0.207754	2.6239	0.800819	0.889938	0.473328	1.21627
PF3D7_0517600	F-actin-capping protein subunit beta, putative	CPbeta	1.71091	1.32097	1.85733	1.56769	5.38449	4.57635	1.80772	0.86473	0.956443	2.07349	0.616721	3.44899	1.08147	0.353191	0	2.85818	1.03937	1.07188	1.92989	5.06048	4.33427	3.54064	3.26195	2.21562	3.8	5.7098	5.01201	3.8042	2.59214	1.79484	3.3497	4.21603	1.49306	2.83848	0.956397	2.55841	3.26805	2.40145	0.981599	3.1816	0.902501	1.84162
PF3D7_0517700	eukaryotic translation initiation factor 3 subunit B, putative	EIF3B	193.667	169.298	169.54	129.194	189.231	138.828	375.146	301.071	221.089	209.289	188.89	245.038	177.769	266.29	167.161	213.303	114.538	130.311	126.971	148.798	115.743	137.04	118.636	154.02	148.527	127.075	171.62	165.209	167.153	169.306	234.571	186.6	202.87	183.021	151.772	174.691	76.608	140.946	159.314	116.104	93.9836	204.616
PF3D7_0517900	NA	NA	1.00527	0.689919	2.54637	1.36463	0.337467	0.84358	3.93391	3.16143	3.49673	3.51957	6.11994	9.00672	32.0541	36.893	40.5632	11.3824	37.6373	42.4531	0.71996	0.480544	1.27949	0.39626	0.567886	1.0286	1.16745	0.458788	0.361059	0.812808	0.812297	0.312471	0.636178	1.18567	2.07946	0.317675	0.999018	1.33621	3.10335	1.41101	4.95582	1.16319	7.07039	2.45805
PF3D7_0518000	NA	NA	28.672	31.4206	33.6358	25.1419	29.1081	20.6646	37.7864	37.0855	32.4014	41.1934	41.0074	43.9487	51.4474	38.9501	52.3036	39.7864	52.8163	50.2187	51.8658	47.7495	41.1565	36.9136	35.8554	45.248	28.7594	31.3415	29.8973	41.1303	36.1532	25.2271	21.0713	29.8042	25.0212	25.4281	21.7148	35.4564	11.5637	33.7533	30.2466	16.5115	24.2315	41.5924
PF3D7_0518100	protein AMR2	AMR2	4.76777	4.83806	5.96447	3.05113	6.53927	3.48649	19.5105	16.0343	12.9288	12.4368	14.0762	11.7689	16.7045	21.6718	14.1142	6.67529	15.8889	12.4031	1.93169	1.807	1.4804	1.23501	2.19315	1.56806	2.70519	3.29497	4.7703	3.67138	7.98023	7.17698	14.2888	10.2597	11.148	12.6559	6.09184	12.6417	3.72166	7.64811	5.38397	7.83597	7.24954	14.4674
PF3D7_0518200	SWIB/MDM2 domain-containing protein	MDM2	0.474713	2.19912	0.515337	1.15993	0.956156	0	13.3753	9.59719	28.3068	20.136	48.5971	56.3242	136.23	47.8226	153.401	26.9632	172.263	144.737	0.611966	1.53174	0	0	0	0	0.496168	0.974925	0	0.383826	2.87688	0.664	13.5188	5.75896	8.28535	6.7506	24.0597	16.0041	45.5029	25.9862	20.6991	27.5426	55.424	30.8859
PF3D7_0518300	NA	NA	131.044	162.406	151.009	148.029	144.804	133.203	398.162	370.412	320.161	344.415	400.013	544.214	590.021	662.991	628.154	343.144	494.925	519.958	100.555	121.369	98.0579	111.92	115.668	104.754	114.139	120.324	133.425	136.438	178.687	171.659	232.13	223.166	207.842	177.23	230.613	236.958	204.078	277.363	380.097	235.18	339.593	368.188
PF3D7_0518400	cyclin, putative	CYC3	0.544888	0.21035	0.295759	0.332851	0	0.342934	0.767625	2.20318	2.43685	4.62253	5.89237	2.82453	1.72212	0.899869	2.5154	0.910267	0	0.455159	1.05365	0.879083	0.480129	0.322177	0	0	0.854272	0.373015	0.660503	1.54198	0.330216	1.52431	2.32758	1.23943	1.26802	2.58284	2.43673	2.9629	3.02779	3.82405	1.25047	3.64778	2.1078	2.60674
PF3D7_0518500	ATP-dependent RNA helicase DDX23, putative	DDX23	60.2091	56.9031	51.6841	49.3116	52.4388	53.3317	111.131	116.614	123.497	128.506	139.463	121.117	155.334	149.427	161.449	103.842	137.276	141.662	68.9214	65.0579	76.6327	75.8806	60.7974	78.3555	64.0957	71.2528	62.307	71.8956	72.1658	70.8826	83.3498	78.5376	87.8955	80.9688	107.453	103.675	79.6142	112.915	125.125	116.858	117.591	135.859
PF3D7_0518600	WD repeat-containing protein 26, putative	WDR26	0.834186	0.49252	0.799035	0.719395	1.33428	0.432359	16.176	14.2192	16.3856	13.0831	16.0606	11.9833	43.5478	50.2433	38.2825	16.5587	47.6957	40.7433	0.885602	0.474994	0.302666	0.580271	0.436587	0.847267	0.564163	0.436693	0.991358	1.30928	0.832652	1.50999	3.28389	2.97644	4.33927	2.46553	6.94892	7.52441	7.83918	6.06099	7.43232	6.059	17.4632	20.8927
PF3D7_0518700	mRNA-binding protein PUF1	PUF1	0.165335	0.38296	0.0717937	0.0807975	0.0666029	0.0416225	0.605593	0.935916	0.542237	0.520971	0.572135	0.533274	1.04508	0.873752	0.814131	0.276202	0.964232	0.662923	0.170511	0	0.0582742	0.0391032	0.0840591	0	0.138246	0.135821	0.0801666	0.106945	0.280553	0.0925046	0.470839	0.100288	0.34628	0.156742	0.147876	0.503458	0	0.232067	0.303544	0.590318	0.488398	1.2339
PF3D7_0518900	NA	NA	0	0.248106	0.348844	0	0.647244	0.808972	1.81081	0	3.35327	1.16833	0	0.740333	0.812485	0	0.49448	0	0.520576	0.805282	0	0	0	1.52001	0	0	0	0.219983	0	0.259821	0	0	0.457559	0	1.12171	0.304642	0.479016	1.39788	0.446405	0	0.245819	0	0.226011	0
PF3D7_0519000	histone RNA hairpin-binding protein, putative	SLBP	0.426273	0.987359	0.925504	0.520787	2.14647	3.21938	28.8251	31.5989	22.2411	21.6976	21.8191	21.3601	8.89174	7.39178	4.26363	1.78028	10.0131	9.258	0	0	0.375611	0	0.541809	0.245342	1.33662	1.45907	2.92808	2.24029	11.8833	12.5212	18.5124	15.1907	24.5517	19.5997	18.1097	22.4838	18.0612	25.1295	10.2717	28.8541	10.1936	27.5303
PF3D7_0519100	NA	NA	4.51167	1.93522	2.17679	0.612445	1.51455	1.89299	76.2712	76.3476	111.348	108.141	111.311	124.731	210.401	214.421	172.791	91.2816	203.837	194.298	0.646236	3.23503	0.883438	1.18561	2.54867	0.577046	0.523953	1.02952	0.405108	0.40532	13.3672	9.81658	32.8344	13.6833	33.8308	19.4849	50.814	51.7914	96.7985	54.8828	96.6364	67.1191	134.684	117.512
PF3D7_0519200	NA	NA	421.648	374.512	407.737	596.304	647.41	768.791	832.249	811.483	1029.79	1201.34	1468.45	1717.16	1669.29	1187.58	2014.44	930.775	1552.65	1756.34	368.861	627.273	517.889	472.726	569.037	453.207	610.753	517.086	531.705	485.591	601.193	525.36	795.49	772.204	951.358	780.857	1205.87	811.191	710.026	1383.41	1951.17	1027.12	1134.46	1081.72
PF3D7_0519300	protoheme IX farnesyltransferase	COX10	0.0965518	0.149093	0.314443	0.589797	0.583417	0.121533	13.874	11.1913	8.06025	9.71209	12.6684	15.3485	18.187	17.3804	19.3144	8.22606	15.1721	12.1785	0.124468	0.103846	0	0.114177	0	0	0.201831	0.132193	0.702229	0.312265	1.75539	0.945357	2.19967	2.19621	3.37031	3.20367	10.7945	6.72016	22.1311	25.2069	9.52786	16.2311	13.6495	14.1342
PF3D7_0519400	40S ribosomal protein S24	RPS24	2687.92	2713.64	2628.08	2967.39	3048.88	3308.62	3060.7	3097.11	3847.34	3619.12	4313.86	4373.5	3375.01	2774.79	3315.82	3065.43	3245.36	2967.16	3577.21	4180.08	3951.16	3420.79	3114.51	4711.64	4826.04	3955.14	4080.56	3959.43	3918.78	3785.22	4049.7	4066.84	4282.71	4224.42	4430.61	4739.75	5209.3	4034.69	4200.37	6081.62	3739.88	3384.77
PF3D7_0519500	CCR4 domain-containing protein 1, putative	CCR4-1	18.1264	18.9713	19.9783	8.7044	24.7709	17.746	45.5748	51.8472	47.7008	44.4238	42.289	24.4475	39.0835	38.8744	34.1686	20.0193	37.6032	33.9001	9.28202	1.89544	8.40756	5.74585	10.6877	18.7209	24.2873	19.2682	22.9287	25.4648	29.2021	29.932	44.0563	38.0626	42.3582	38.5931	44.6963	49.4467	16.6824	38.7998	19.7401	80.0375	42.2483	52.7045
PF3D7_0519600	NA	NA	22.2964	24.3823	22.7648	15.4934	32.6383	22.4313	53.3631	44.0151	34.5973	35.6604	31.6702	33.4178	40.3422	57.3548	43.2376	28.2472	45.3851	33.9262	16.6688	11.411	13.5116	15.9767	13.485	11.3539	14.8142	19.1787	26.9938	21.1774	25.5175	26.7814	34.3441	24.5099	32.7907	27.9739	28.0472	35.0649	23.4894	36.5308	18.7047	35.6361	28.8567	45.9179
PF3D7_0519700	NA	NA	182.142	165.948	142.041	170.961	262.234	220.277	117.55	93.6447	146.169	156.605	168.996	151.471	171.98	105.094	218.827	116.071	185.667	154.318	178.301	293.331	185.957	209.248	153.927	131.554	132.346	163.363	160.836	144.12	175.904	148.502	133.142	121.61	134.489	164.98	243.442	155.36	205.67	196.414	98.8499	277.248	189.761	140.723
PF3D7_0519800	NA	NA	79.8028	73.6918	65.6859	74.8391	89.0468	76.2809	79.9638	85.5915	79.3099	82.6389	98.5878	90.9563	79.3357	68.99	92.6762	77.2978	79.3586	65.0184	79.3306	83.1121	68.1726	69.5593	71.6695	92.6162	121.982	94.9627	108.014	99.0581	77.3121	88.1721	79.488	84.5121	78.1424	88.0868	65.3438	88.4175	16.2648	79.2762	71.0065	66.1883	41.7664	108.797
PF3D7_0519900	NA	NA	0.833906	1.47165	1.03459	0.291086	2.51945	2.09933	10.2374	11.5604	13.3193	14.2932	17.1767	15.7813	23.3435	11.4109	17.4149	5.77137	22.0008	17.7131	2.61075	0.89691	0.104971	0.845254	0.757091	1.37131	1.49416	1.5495	2.40677	1.25218	4.62052	5.8321	6.61546	7.40673	8.03963	6.43745	9.76701	10.6236	8.7711	7.02288	8.0195	10.8108	8.96524	15.1597
PF3D7_0520000	40S ribosomal protein S9, putative	RPS9	2535.84	2382.62	2437.43	2681.46	3154.32	2720.76	3407.02	2867.04	2428.73	2474.89	2568.78	2837.15	2105.1	2907.38	2337	3020.86	1653.58	1853.5	2236.74	2701.18	2619.8	2902.79	2528.13	2722.74	3036.17	2932.56	3355.47	2636.71	2545.52	2462.91	2982.9	2850.69	2883.83	2742.96	3786.47	2549.76	4694.69	3748.66	3157.89	3763.67	3371.98	2322.15
PF3D7_0520100	protein phosphatase PPM9, putative	PPM9	26.1461	34.4207	33.002	18.7329	20.7974	20.5275	41.2042	45.5127	44.262	39.3134	33.8651	34.4066	36.8635	38.4958	25.3675	24.5785	42.5002	39.239	33.9343	25.2617	28.7398	20.7524	27.6001	26.2201	21.2138	26.2113	22.5617	30.0264	42.8627	40.7867	41.2676	37.4984	43.8292	39.4915	19.95	52.5317	12.4356	23.7611	19.0519	27.0301	22.8776	57.4109
PF3D7_0520200	mediator of RNA polymerase II transcription subunit 17, putative	MED17	5.56597	5.2678	4.48299	4.27746	10.4876	10.6221	39.3325	28.1921	30.1115	29.8108	37.2789	50.8793	32.6857	29.8001	32.3254	10.4981	29.3775	23.622	6.82807	10.235	3.95522	7.00665	6.16172	4.2369	5.44221	5.40818	7.03716	5.87946	15.7775	13.8127	23.009	20.2843	27.1589	21.0216	33.7233	30.2657	42.5268	46.6228	16.0698	42.7374	26.1402	35.5607
PF3D7_0520300	U6 snRNA-associated Sm-like protein LSm2, putative	LSM2	37.9588	39.5418	34.6664	61.0973	55.8248	51.5719	81.4864	79.5829	86.227	98.5779	72.1059	84.6755	95.2131	84.579	84.3706	59.3862	72.2299	69.9588	51.264	106.279	40.3493	34.9128	52.842	60.3401	56.0479	38.3596	62.8113	51.1522	52.5806	53.0945	78.0709	48.4251	58.1887	76.5414	73.6487	76.0097	61.1017	64.2735	53.0047	68.123	62.718	71.4848
PF3D7_0520400	NA	NA	0.622471	1.2816	0.225247	2.28146	2.08961	0.783524	14.0308	17.0589	20.4147	28.6667	24.532	28.4427	42.2318	19.1893	44.3804	7.97237	49.4116	38.9975	0.534964	4.24017	1.27981	0.736099	1.05491	0.71653	0.650604	0.710211	0.335355	0.503295	6.03574	2.61203	11.5223	12.5858	11.3471	12.3925	20.1044	22.3395	15.8533	21.8427	8.09494	25.929	15.1772	31.1686
PF3D7_0520500	NA	NA	2.21634	4.04468	5.68694	2.70776	8.52239	7.86211	31.5072	31.2295	41.1496	36.3835	24.9841	34.8147	41.5191	43.9229	42.476	18.5127	47.9817	43.928	1.81819	1.30025	1.24278	0.953062	1.53658	3.24704	3.58007	5.93106	7.00147	5.37603	16.3622	8.17297	22.9515	22.3044	28.6018	23.4947	30.6355	23.2268	19.0332	16.9685	23.1196	29.3751	38.6871	28.5316
PF3D7_0520600	bis(5'-nucleosyl)-tetraphosphatase [asymmetrical]	Ap4AH	821.16	844.921	881.207	625.455	809.245	615.532	469.656	452.084	313.817	339.007	198.415	179.748	155.846	272.578	105.877	491.247	147.292	129.661	729.656	734.312	717.071	866.444	560.645	628.433	584.311	746.627	783.739	747.723	497.396	512.14	351.064	345.312	299.269	332.359	279.614	357.213	304.387	310.423	206.464	300.379	220.649	327.205
PF3D7_0520700	NA	NA	2.82783	3.02689	2.51168	4.08297	4.98378	4.44934	2.26351	5.02401	7.18558	7.63309	6.67197	5.92266	5.6874	3.50257	4.9448	3.86513	3.33168	4.40221	3.14833	7.60369	3.62436	7.29606	3.59428	2.21941	1.88086	3.47573	2.02554	2.33839	5.76439	6.20279	5.94826	4.67805	5.75811	7.18956	10.3467	8.52707	1.96418	8.93064	1.81906	7.6489	4.249	6.02624
PF3D7_0520800	NA	NA	1.92103	1.76571	1.98612	1.00584	1.71968	2.45644	9.83718	13.069	15.8642	12.971	13.8052	7.48168	24.9409	18.028	19.9416	6.52026	29.7374	21.8543	1.53304	0.951092	0.859793	1.00964	0.8139	1.053	1.11547	1.56557	2.04525	1.87374	4.61981	3.62535	7.68498	4.5315	6.81213	6.88003	5.18177	9.84893	3.47349	5.94915	3.42891	6.89518	9.92963	13.2164
PF3D7_0520900	adenosylhomocysteinase	SAHH	644.114	605.261	592.097	713.881	601.745	613.415	1209.76	1097.04	1060.62	1129.95	1222.54	1599.44	1603.66	1755.79	1738.04	1175.26	1197	1338.03	511.436	714.823	546.972	610.095	567.312	483.276	490.66	503.768	517.779	496.412	464.085	499.229	447.978	525.001	477.72	467.94	767.893	923.813	1015.39	1450.5	1470.8	1306.45	1169.66	2035.97
PF3D7_0521000	NA	NA	32.478	34.6774	42.5973	11.653	18.6036	13.3737	86.0657	76.319	78.6538	57.0659	42.1283	23.9217	53.4221	66.1985	34.5564	28.4393	43.4214	39.3331	32.0628	12.3365	12.4473	20.5597	16.2668	15.2878	11.2312	10.4142	10.5375	15.424	42.2919	38.6732	65.8435	53.4618	64.3416	51.6219	28.7963	76.8127	14.2566	31.8597	11.0832	45.0837	22.1634	72.8932
PF3D7_0521100	NA	NA	0.0820722	0	0	0	0	0	0.231243	0.331848	0.672913	0.497325	0.532512	0.803603	0.570655	1.08432	0.820895	0	0.664782	0.479899	0	0	0	0	0	0	0	0.0280922	0	0	0.0497379	0.0573989	0.0584309	0.0622285	0.143244	0.0778065	0.550539	0.133883	0.342039	0.172796	0.125566	0.366291	0.375205	0.981581
PF3D7_0521200	NA	NA	0	0.147053	0	0	0	0	6.70797	7.70109	5.11072	4.84733	3.02081	3.07159	4.81564	6.60542	5.86162	0.636357	6.47951	5.56844	0.736592	0.204852	0	0.22523	0	0	0	0.130385	0.153917	0	0.692551	0.532815	2.71197	1.15529	2.21614	1.98619	1.70349	2.69272	2.38128	3.20802	1.16559	3.11681	2.41124	9.1117
PF3D7_0521300	NA	NA	5.12097	6.14642	5.45814	4.83449	9.00179	7.03192	7.93574	8.72161	12.7002	11.0583	15.7743	13.5141	15.1254	9.91795	20.7031	7.93271	19.3824	13.6886	9.42228	11.2661	8.12224	8.64324	6.15392	7.50245	5.20644	5.00355	4.51458	4.29109	9.81817	7.61874	7.68943	8.25979	9.96704	9.97444	19.2229	12.3028	19.9838	19.4072	5.3063	33.2437	15.3565	16.0355
PF3D7_0521400	NA	NA	1.66951	2.32021	2.4165	4.07934	4.81984	6.44447	12.387	16.351	32.5202	31.9683	45.7365	58.2075	34.1915	14.8886	47.9549	7.62328	28.6686	24.9165	1.29133	3.35186	2.1576	2.36911	1.41467	1.02495	1.5123	2.66676	3.23799	2.0698	7.55451	6.53858	15.0555	10.2956	14.634	13.717	42.8052	22.3928	25.2025	43.5861	23.5842	32.9502	20.1965	29.1788
PF3D7_0521500	NA	NA	5.52146	5.05617	4.18184	3.60816	5.56059	4.5256	27.677	23.5367	20.8647	19.6078	13.3303	14.9394	25.6482	26.5074	21.7348	7.93686	25.5861	22.7393	5.46255	4.00511	3.96008	4.85906	3.5906	2.95618	2.68419	5.27419	5.18838	5.08727	10.7388	8.0823	16.6381	14.7986	17.1819	15.46	14.7386	19.6899	10.7027	13.8779	8.84042	15.8552	16.4367	20.3945
PF3D7_0521600	NA	NA	0.646001	3.99015	1.40257	0.789233	2.60232	1.62628	10.0108	14.8014	24.0754	13.3093	13.9716	17.1154	5.71671	4.26742	5.96435	3.23755	7.32563	5.39622	6.66223	12.5065	1.70768	6.87531	2.46328	0.743615	0.675198	1.76894	1.56614	1.04464	7.04688	3.61435	5.51901	5.8777	9.77159	3.67455	20.2224	11.2407	19.7431	16.3212	11.8601	5.76625	3.18046	14.8342
PF3D7_0521700	ATP-dependent RNA helicase DDX1, putative	DDX1	1.93493	2.24091	2.42368	3.27316	2.69813	1.40513	6.81472	4.81455	5.1033	9.10937	9.65732	9.60146	6.86801	4.30163	5.38231	5.2216	5.06356	4.16509	4.12532	7.92428	4.19685	5.72036	3.12152	3.59797	2.80023	3.00583	1.86436	2.76792	3.87867	2.60238	4.4506	2.9342	5.9749	4.1626	11.2045	5.9082	4.96241	16.2954	6.71769	8.41424	2.87882	9.68394
PF3D7_0521800	NA	NA	0.0985253	0.15214	0.32087	0	0.198447	0.372051	0.832801	1.72629	2.35	2.02988	4.54589	3.85881	5.35589	8.29832	10.1578	2.79807	7.82091	7.48937	0.508048	0.741784	0.694526	0.11651	0.375689	0.340239	0	0.134895	0.238861	0	0	0.137811	0.280578	0.448221	0.22928	0.280214	1.02808	0.750042	1.3687	2.07437	1.65812	1.75889	0.900845	3.11087
PF3D7_0521900	NA	NA	0.423393	0.190689	0.0766042	0.215528	0.106598	0.0888229	0.894698	0.665751	1.20973	1.19728	0.508725	0.609649	0.669065	0.81576	0.868681	0.412593	0.685894	0.707342	0.591292	0.607174	0.186537	0.292063	0.0896914	0.365527	0.295019	0.0966142	0.342152	0.285276	0.384881	0.690919	0.251193	0.160512	0.451589	0.468285	0.736326	1.95691	0.539155	1.2876	0.269903	2.99189	0.545938	2.36309
PF3D7_0522000	NA	NA	38.8737	38.5253	23.9346	26.2274	36.812	34.3251	88.2769	97.7492	139.254	113.912	111.264	99.585	85.8188	84.3211	99.102	32.955	102.452	72.699	35.902	42.4347	15.3375	27.4447	27.2861	17.3648	21.8314	17.4764	29.0703	26.2707	107.595	91.7058	109.051	132.856	124.219	136.962	102.057	138.186	127.349	72.48	33.7318	87.1789	55.0901	105.476
PF3D7_0522100	NA	NA	0.492111	0.316627	0.356149	0.601222	0	0.206478	0.924365	0.663262	0.611339	0.596399	2.95647	0.661357	4.66594	2.84448	6.05803	1.37017	11.2939	10.2768	0.211465	0.17643	0.144541	0.290971	0.416995	0.566471	0	0.44918	0	0.265262	0.298232	0.344168	0.23357	0.124375	0.0954334	0.311022	0.855834	0.62438	0.455754	0.230244	0	0.488068	1.84595	1.17713
PF3D7_0522200	transcription initiation factor TFIID subunit 10, putative	TAF10	27.3142	24.397	23.8377	26.1729	17.2598	21.5726	21.8806	22.377	34.3311	36.3481	40.1554	59.2266	45.3638	36.264	58.5135	20.5783	36.4403	48.7643	31.7595	62.7881	26.8995	28.5002	23.145	17.262	20.152	19.0652	14.7155	17.7544	21.4217	26.2195	20.5901	16.2432	27.4196	22.3404	39.1197	28.54	66.2168	72.9185	26.2207	40.6348	25.6146	36.3829
PF3D7_0522300	NA	NA	241.534	272.866	238.952	237.183	187.483	179.548	312.34	307.11	282.276	244.394	221.439	184.787	167.077	219.764	139.201	277.118	142.855	159.124	311.662	240.176	257.803	308.528	273.403	257.31	218.155	216.043	227.229	234.717	286.952	295.135	382.852	371.453	349.708	323.597	205.838	308.518	236.773	241.791	242.288	273.222	190.231	325.065
PF3D7_0522400	NA	NA	0.235622	0.317062	0.255786	0.115146	0.094917	0.059317	0.663879	0.680506	0.75268	0.913778	0.66976	0.411009	3.57448	2.63493	3.71896	1.01217	8.49571	5.10049	0.182249	0.253424	0.183891	0.0796096	0.0598971	0.123989	0.112581	0.0276515	0.0598436	0.114307	0.106075	0.216578	0.345086	0.265427	0.368159	0.210612	0.461622	0.45392	0.280562	0.71814	0.257492	0.911378	1.92235	1.41707
PF3D7_0522500	50S ribosomal protein L17, apicoplast, putative	RPL17	1.12567	2.31763	2.03666	0.916834	4.1567	3.30613	103.078	102.661	135.364	102.316	152.025	125.347	229.588	205.731	255.782	88.3831	269.889	245.105	0.96742	0	1.65314	5.32459	0.476922	2.1596	2.35308	1.02747	2.72902	3.33722	14.0985	8.39742	36.3307	22.191	39.73	18.8532	38.0345	53.4563	70.369	37.3933	135.767	45.7732	124.827	124.577
PF3D7_0522600	NA	NA	0	0.29988	0.702733	0.158173	0.130385	0	0	0	0.193001	0.627616	1.12004	4.32498	13.7485	10.263	12.9494	4.9745	24.9586	23.468	0.5007	0	0.228161	0.1531	0.493673	0.298061	0	0.265889	0	0.10468	0	0	0	0	0	0	0.578976	0	0	0	2.27789	0	6.10089	0.495496
PF3D7_0522700	iron-sulfur cluster assembly protein SufA	SufA	0	0.271801	0.38216	0	0	0	3.9675	2.84681	4.19832	8.10611	10.1516	8.92142	13.7963	8.72064	14.626	4.11666	17.1088	13.821	0	0.378631	0.620392	0	0	0	0	0	0	0	2.5601	0	2.50629	1.60151	4.91536	0.667475	8.921	3.06277	7.82463	10.3765	4.03944	2.61857	7.18029	7.41017
PF3D7_0522800	pre-mRNA-splicing factor BUD31, putative	BUD31	60.1217	88.9157	77.217	31.0361	48.1825	44.2338	127.047	120.406	76.3711	77.4808	61.6575	68.7684	71.7238	123.063	87.9539	53.0476	60.3586	64.7218	54.5808	65.1195	46.2611	56.5768	43.59	48.737	40.2701	62.606	53.0336	58.881	58.5018	65.736	79.5781	77.0456	76.3596	78.6719	46.0729	93.9318	73.5211	76.6619	54.0885	97.6301	61.6414	111.403
PF3D7_0522900	NA	NA	0.322793	0.436142	0.306614	0.0985907	0.325081	0.253943	0.284214	0.27191	0.300749	0.244499	0.290887	0.418314	0.459083	0.59972	0.310443	0.269622	0.457557	0.370751	0.0520152	0	0.0355537	0	0	0.139338	0.253036	0.30384	0.228248	0.195744	0	0.28219	0.22981	0.0611867	0.187794	0.153008	0.0601469	0.482687	0	0.0566344	0.339525	0	0.0567574	0.424665
PF3D7_0523000	multidrug resistance protein 1	MDR1	124.309	112.979	109.654	136.776	188.119	167.248	155.666	148.867	134.856	170.013	176.818	235.355	99.8027	88.9825	114.011	138.296	79.3511	74.2022	135.676	271.959	172.955	189.478	141.456	153.963	157.647	171.98	164.468	162.806	126.975	127.151	139.742	134.772	133.345	133.704	205.169	139.221	65.7772	214.061	171.113	119.415	82.4024	142.245
PF3D7_0523100	mitochondrial-processing peptidase subunit alpha, putative	QCR2	38.6514	39.6992	38.1446	37.0615	49.6593	54.254	136.953	118.553	116.46	147.341	128.854	160.555	124.823	135.014	124.359	74.3526	89.3687	106.546	27.9331	34.0131	24.6661	29.0862	30.8163	26.6951	39.4189	32.1525	46.6632	47.4452	60.4759	52.9165	93.8936	88.2736	94.3074	78.1707	89.5671	92.2209	52.0667	84.0077	108.234	78.0617	83.8606	116.884
PF3D7_0523200	NA	NA	2.1039	1.88781	2.34567	0.764167	2.51967	1.35991	5.04668	6.51425	10.3415	7.51145	6.14902	3.53707	8.05113	4.78923	3.76244	1.61486	8.47471	6.2698	2.8588	2.01822	1.90396	2.01726	1.37321	0.654543	0.772617	1.55705	0.643321	1.28731	3.72168	2.38606	4.696	3.27665	4.43289	3.71957	4.74669	7.35885	1.42185	3.11268	1.00045	3.72207	1.99964	6.31105
PF3D7_0523300	cytochrome c oxidase subunit ApiCOX18, putative	ApiCOX18	3.82669	2.58522	3.11563	0	6.26245	7.22517	76.1472	99.2833	111.239	74.7821	127.593	93.1208	254.584	269.377	247.315	125.457	261.142	313.261	3.08319	1.02895	2.10744	1.13131	0.607985	0	2.99973	3.27456	4.63865	1.16027	16.8133	8.02883	23.1574	33.3668	28.9418	18.139	32.0868	58.783	56.4822	44.9837	105.017	44.1198	140.627	183.069
PF3D7_0523400	NA	NA	24.5251	24.7339	22.4201	28.0991	39.471	37.5172	58.0247	44.9163	45.8316	59.4448	81.0439	94.486	100.876	83.3306	129.468	62.1419	109.877	99.0014	17.3963	28.5236	22.5409	18.0395	25.8029	27.0152	36.7945	34.5423	41.6298	30.3611	43.2373	32.4987	48.4549	44.8423	50.5189	48.2807	65.0708	48.6215	44.3396	69.012	65.8878	57.9576	77.4151	75.5612
PF3D7_0523500	NA	NA	0	0	0	0	0	0	6.96923	3.70418	23.7628	7.32769	16.6434	3.79908	4.16933	13.6164	3.38328	6.42776	14.2473	10.5605	0	0	0	0	0	0	0	0	0.888395	0	1.33245	0	3.13066	1.66707	1.27914	0	4.09685	6.57555	11.4538	5.40064	4.62528	13.9014	6.18556	9.9925
PF3D7_0523600	NA	NA	0.60252	2.32599	0.981123	1.10417	5.15772	0.758411	51.7778	41.8216	39.0716	32.1291	38.6592	34.7031	65.1258	85.0766	86.6885	30.6996	53.1963	66.6874	0	0	0.265456	0.356253	0	0.346782	1.88925	1.44364	5.11255	1.70507	7.30286	7.16354	20.5901	16.9031	22.7847	14.8513	18.4122	26.2102	12.1366	20.2969	31.3419	10.7563	16.7389	48.1369
PF3D7_0523700	NA	NA	0.0853126	0.559884	0.27784	0.260571	0.472545	0.161078	1.86289	2.24218	2.98869	2.89498	2.76769	2.50599	2.42667	1.6907	2.03481	0.427559	1.93488	1.71033	0.0549895	0.0458791	0.0751734	0.151329	0	0.0491019	0.0445842	0.0584026	0.172357	0.0344895	1.18914	0.656316	1.94361	0.776225	2.28312	1.81977	1.14455	3.06173	2.07401	2.93377	0.456832	2.85565	0.450022	3.55077
PF3D7_0523800	NA	NA	8.1415	8.47543	7.24933	7.37616	7.4622	7.94505	4.25276	4.06865	6.5457	6.76267	12.3983	12.7505	14.3401	9.97081	22.8038	11.767	14.0783	9.62811	13.4436	24.302	13.6223	15.0365	11.1621	10.4247	5.73671	7.45213	4.58334	8.06202	5.76553	6.90948	3.64711	2.77439	2.34167	3.29548	4.09087	4.67575	2.92281	3.85197	5.80815	0.952623	5.27579	5.07648
PF3D7_0523900	NA	NA	9.21501	8.06343	9.00325	13.5098	13.6112	13.1458	6.49095	5.79595	4.57905	9.30656	9.3007	11.6766	21.7459	10.1456	26.9419	12.3154	13.4354	13.8556	7.52359	24.7781	14.8864	13.0766	16.3977	19.8006	10.5946	10.7242	10.1774	8.19581	7.44605	7.73365	3.06161	2.32899	1.78704	4.07683	9.15766	3.00647	3.8404	10.3474	8.45907	5.94055	12.7463	7.93522
PF3D7_0524000	karyopherin beta	KASbeta	382.049	368.966	367.841	280.136	378.301	276.342	456.778	373.211	269.434	361.398	307.221	395.783	344.215	402.707	340.742	365.544	246.827	272.66	285.244	365.883	269.295	298.974	301.79	256.372	208.195	268.333	265.492	294.434	310.083	295.695	304.822	278.813	284.055	276.15	332.164	257.005	327.673	328.494	226.837	239.853	278.548	309.163
PF3D7_0524100	NA	NA	13.6507	15.9843	15.6391	6.58477	11.0081	9.57402	27.3204	31.6368	36.7193	32.4155	31.5207	23.2098	46.0403	34.8555	29.9192	20.953	46.6761	31.2629	30.6495	15.4947	15.8898	20.2526	13.317	14.0898	8.47633	10.4483	7.32712	11.811	17.7053	21.2779	23.4536	22.4572	25.261	22.3009	15.8433	29.0335	7.13746	18.9481	10.6736	20.083	16.7219	38.6526
PF3D7_0524200	NA	NA	3.23417	0.624266	0.877736	0	0	0	0.569528	1.08975	0.602662	1.95978	0.582901	1.86277	2.04432	0.667645	3.11044	1.35072	4.58442	1.68849	0.521158	0	0	0.956137	0	0	0	0.553506	0	0.326871	0	0	1.15128	0.613051	0.470394	0	0.602633	1.31897	0	0.56744	0	0	0.568672	1.16042
PF3D7_0524300	NA	NA	8.15993	9.74744	8.18969	5.07863	8.83798	6.39525	18.87	15.3555	17.2136	16.793	12.6534	14.5429	23.3565	24.9178	19.19	7.71602	20.9509	16.719	6.94665	7.94847	4.88387	3.82337	3.52243	5.84843	9.49424	7.16702	13.1884	8.96285	14.9287	10.9829	15.7841	11.907	17.7351	14.0121	11.9342	12.5577	7.27191	11.2373	7.18432	16.4912	11.37	19.1502
PF3D7_0524400	ribosome-interacting GTPase 1, putative	RBG1	394.977	333.773	320.979	449.921	387.086	427.992	260.248	255.443	285.597	344.642	395.958	473.722	248.474	201.88	331.423	358.088	210.513	218.669	422.879	788.501	530.274	525.385	485.057	470.032	499.975	460.261	397.36	406.704	355.885	358.016	346.413	397.746	353.2	438.398	587.757	347.25	344.866	559.44	427.483	503.037	375.335	330.08
PF3D7_0524500	NA	NA	8.08543	8.97382	3.8401	12.3477	10.6874	9.5413	9.96675	8.17309	11.2999	25.1097	33.5168	50.062	48.5526	14.1875	50.5446	11.8188	30.2899	31.6593	3.90869	26.6324	10.2415	13.7445	12.8461	9.88889	5.28179	6.22694	4.9005	5.31165	9.79997	9.89575	12.2323	13.0273	13.5238	15.8095	17.3257	13.1897	35.8024	19.1511	13.1434	8.2696	13.8614	23.2084
PF3D7_0524600	NA	NA	2.18589	3.00035	1.58197	0.890182	1.46759	3.97431	10.6069	11.7845	18.8273	15.306	30.1165	33.2934	70.3131	38.1049	80.353	15.8238	85.7739	61.6758	0.939297	2.87349	0.642033	1.72327	1.23482	3.07534	4.31551	2.494	2.9441	2.94564	5.29882	2.03833	8.2999	5.15628	9.60844	5.29582	18.4644	14.7915	26.3171	13.6362	15.6067	21.318	27.3315	35.5547
PF3D7_0524700	mitochondrial import receptor subunit TOM22, putative	TOM22	89.2639	100.869	114.872	71.5001	72.0364	63.9927	237.348	192.813	128.663	115.345	66.4837	62.6489	80.712	151.322	57.3084	55.303	57.4598	62.2194	41.9139	39.4205	40.1089	35.6522	44.3313	49.6749	69.8192	63.5357	96.0221	106.588	104.61	75.245	164.98	143.431	165.082	116.008	36.1296	122.793	13.9607	26.5519	67.38	54.5255	47.3983	125.566
PF3D7_0524800	ubiquitin fusion degradation protein 1, putative	UFD1	3.30741	3.38181	2.91118	1.63814	3.96102	5.1758	6.42243	5.42152	5.99653	9.53331	5.54213	6.17824	5.4243	4.87162	5.22696	2.53862	5.35799	6.86959	1.72852	2.59587	0.630127	0.634242	1.81788	1.44056	1.30801	2.20297	1.22804	0.795029	5.09221	3.25086	5.85492	5.96435	8.42482	7.03372	7.06224	8.45757	3.97371	8.15543	2.59846	5.05335	1.94898	6.24353
PF3D7_0524900	S-adenosyl-L-methionine-dependent tRNA 4-demethylwyosine synthase, putative	TYW1	56.2628	54.9846	55.1625	39.0906	55.5131	48.4892	55.0726	59.1785	56.9543	54.7485	38.3689	31.3837	23.629	29.8212	17.8418	35.4581	21.5547	22.705	67.221	42.6594	48.0687	41.2836	45.581	48.3545	50.7265	57.9474	56.2707	61.5255	76.5641	78.5199	90.7576	85.511	86.7708	87.1558	42.5012	80.7562	29.9259	49.268	28.3052	50.6164	23.93	72.9887
PF3D7_0525000	NA	NA	7.555	8.98987	6.07879	10.0988	21.662	20.8095	19.4084	17.49	11.13	11.095	16.7884	17.3033	7.97792	9.68795	12.4462	9.79989	6.19153	6.83062	0.343743	0.382391	0.783189	0.840858	7.90811	8.28736	25.0829	16.7936	28.3719	15.8822	27.2557	20.5134	48.9782	50.8136	43.9535	44.8278	60.0197	33.9283	18.6445	59.2593	17.3381	31.4703	8.43934	37.929
PF3D7_0525100	acyl-CoA synthetase	ACS10	190.682	167.322	168.447	174.465	188.476	155.409	477.14	428.416	273.862	272.105	296.786	378.69	315.576	459.387	383.978	368.091	235.105	270.337	182.893	240.387	188.091	259.462	202.187	158.067	122.243	136.009	162.284	141.095	164.408	161.122	247.815	216.551	225.548	196.02	249.042	208.484	163.637	265.556	341.304	174.547	261.359	333.844
PF3D7_0525200	structural maintenance of chromosomes protein 6, putative	SMC6	0.575814	0.967612	0.956021	0.28967	0.614007	0.639525	19.5641	19.5845	21.7121	16.6661	12.9908	6.672	47.2735	43.9671	27.6241	9.39297	60.0294	47.1373	1.39727	0.510027	0.805838	0.720979	0.516623	0.974739	0.991263	0.672435	0.848538	1.23239	3.73591	3.74281	9.26	6.06092	9.61638	7.96352	8.07854	16.7236	4.32892	8.60515	5.25986	12.7486	20.3685	25.9265
PF3D7_0525300	NA	NA	0	0	0	0	0.261852	0	1.28203	1.57697	1.35661	0.787775	1.68703	0.449268	1.64351	1.0735	2.40059	0	4.42273	3.36648	0	0	0	0	0	0	0	0	0	0	0	0.545527	0.925559	0.394286	0.151268	0.246495	0.775171	0.706915	0	0.364951	0.198899	0.773618	0.0914359	0.870715
PF3D7_0525400	NA	NA	0.133893	0.206755	0	0	0.134842	0	3.77252	1.8046	2.99399	2.59629	6.75692	10.6423	5.41657	3.75907	10.9198	1.34206	6.29029	5.36854	0	0.432028	0	0	0	0	0	0	0	0	0.811429	0	0.762598	0.609121	0.623172	0.126934	6.58647	0.873675	3.72004	3.38282	2.45819	4.78056	2.35428	2.94651
PF3D7_0525500	NA	NA	3.69787	4.51621	4.19679	2.01246	3.21625	2.75046	4.40437	5.07457	5.91346	7.1297	2.52048	2.2073	2.54991	2.66485	1.96572	2.86412	2.55959	2.44306	4.98372	3.39874	2.69557	2.70324	3.8883	3.86967	2.60009	2.69255	3.12416	2.6909	7.04898	5.87769	7.2279	7.79962	6.92343	7.90371	3.90871	7.96994	0.653802	4.76571	0.925778	5.25118	1.726	5.78964
PF3D7_0525600	NA	NA	0.712069	1.09956	0.773006	0.217488	1.79279	2.46484	38.8719	50.6252	51.2177	49.1894	49.5383	26.2482	66.1645	65.5601	56.1558	9.21904	69.7897	44.016	0	0.574401	0.627441	0.842052	0.678801	1.02458	0.744252	0.974925	1.72631	0.431804	7.98336	6.723	24.5873	15.1173	29.8273	10.6322	25.475	36.9773	26.2136	23.7374	42.0791	32.5744	45.0738	48.3728
PF3D7_0525700	NA	NA	0.949426	2.56564	2.06135	4.63974	9.08348	8.96304	101.652	96.6118	142.95	138.651	169.063	141.084	241.853	205.402	337.483	128.472	209.177	218.097	1.22393	0	1.25488	2.24547	1.20676	2.18578	3.96934	3.24975	5.37075	5.37356	24.7412	21.912	50.0195	34.5538	53.5786	30.1527	58.7339	66.5978	52.757	57.3029	171.766	48.7291	121.198	120.364
PF3D7_0525800	inner membrane complex protein 1g, putative	IMC1g	31.227	34.5576	19.2096	21.11	16.5628	19.6532	21.7026	29.7417	13.0343	11.3534	9.30511	8.87292	37.3716	71.1674	78.4843	51.8187	207.072	247.283	22.5431	19.7039	17.61	29.0494	5.8213	10.3044	5.87489	7.83827	6.89761	6.22793	2.77557	3.49427	4.7428	6.6295	5.32905	4.73663	9.62011	5.43362	7.22999	7.88949	11.9439	14.2464	52.2716	9.9593
PF3D7_0526000	NA	NA	1.63061	1.91844	1.68586	0.664051	3.36254	2.83441	7.00089	6.59317	14.8164	10.2573	8.50876	8.05009	9.42362	5.00113	11.2315	2.20517	12.8305	7.71853	0.600592	0.835147	0.27368	0.734579	0.394776	0.625669	0.649261	0.903648	0.250996	0.878947	4.70569	4.56161	9.61894	7.77139	9.30588	7.80292	8.44956	11.9067	4.09896	10.2449	1.00978	7.5085	3.00368	14.4873
PF3D7_0526100	NA	NA	0.152834	0	0	0	1.07742	0.577132	4.09088	5.97367	12.7588	12.2247	11.0182	15.6689	11.9792	5.04805	10.5831	2.55319	4.70423	7.14933	0.197023	0	0	0	0.194258	0	0	0	0	0	0.370487	1.49643	2.82905	2.54939	4.09013	1.5938	9.79646	6.31603	15.2867	13.3002	5.14421	12.96	3.76225	12.4297
PF3D7_0526200	ADP-ribosylation factor GTPase-activating protein 2	ARFGAP2	8.28079	9.54252	9.39195	5.8889	14.314	10.4233	80.964	83.1227	95.0708	75.1926	63.0843	70.9011	151.247	155.942	141.307	47.6948	163.18	147.635	4.93918	1.32932	2.28701	2.48464	3.14185	3.2722	4.65047	3.97662	7.29115	5.796	19.9237	14.5216	41.3563	29.0504	38.5408	26.0118	24.3193	50.6731	13.2205	19.0826	38.2911	27.5802	48.3316	76.5106
PF3D7_0526300	WD repeat-containing protein 55, putative	WDR55	27.0762	25.3849	27.2938	30.2442	27.8525	28.726	14.9853	19.5498	17.2986	23.4387	27.328	35.4229	24.2053	20.7609	25.8915	22.9393	18.7986	17.4478	23.1867	53.6675	18.2345	27.4447	18.4366	14.9159	15.3628	15.3581	11.5656	15.0119	19.6907	22.9941	19.8275	21.4095	20.4781	18.885	20.4691	15.1437	9.40344	22.8027	17.6057	10.9333	8.97765	18.3196
PF3D7_0526400	NA	NA	0.519299	0.267296	0.187913	1.0574	0.52298	0.217886	5.36489	5.36595	10.0638	14.8946	24.7089	26.3207	29.5424	14.2935	43.1509	6.94016	31.4071	20.0987	0.446296	2.23413	0.457582	1.43288	0.66005	0	0	0.592496	0.559542	0	1.46864	0.968487	3.45065	1.57496	4.43106	0.984618	19.0945	5.27101	30.5393	15.5497	16.1548	9.78563	24.1057	7.61859
PF3D7_0526500	NA	NA	22.486	22.566	25.7855	15.6428	25.3336	25.1146	23.583	25.3671	28.0575	23.3582	28.377	22.8795	32.8309	32.0542	35.2277	26.7559	30.8568	28.118	31.5536	21.7031	23.3617	23.7015	25.0727	32.6541	26.4341	32.1183	27.4582	32.7036	33.396	33.9201	27.3792	31.0111	29.5329	28.2229	11.8025	31.4901	3.45682	11.3672	20.0391	11.7115	9.89634	31.2545
PF3D7_0526600	NA	NA	0.733943	0.481133	0.841851	0.389123	1.0878	0.59265	5.34538	4.90867	4.64482	3.75931	3.79369	2.77563	6.88009	8.11871	5.81738	2.77606	5.04757	5.24011	0.0892592	0.10426	0.146426	0.131007	0.140811	0.0956429	0.289477	0.303358	0.111908	0.257524	0.654595	0.561722	1.65631	0.965978	1.51462	0.866464	1.36242	2.28912	0.634833	1.43835	2.42587	1.64811	1.36356	3.56417
PF3D7_0526700	NA	NA	1.80832	1.39618	1.79237	0.864493	2.37539	0.593787	14.2882	15.1532	11.3689	10.8624	14.397	9.14733	22.7613	30.5131	24.0757	9.06269	23.6904	22.658	0.506773	0.253688	0.277113	0.278923	0.599593	0.271508	1.31481	0.753518	0.698901	1.08068	2.38236	3.29917	5.48554	4.53058	5.85484	3.72681	4.10199	7.78086	1.09221	6.40061	4.99195	3.9768	6.30392	11.2839
PF3D7_0526800	NA	NA	496.712	496.524	565.949	374.687	440.547	391.167	338.036	427.998	424.027	295.534	345.973	223.981	494.196	498.635	415.745	363.687	513.338	434.35	421.411	215.888	350.442	335.36	323.332	425.161	391.545	421.76	447.65	494.705	445.201	471.257	352.06	373.654	319.505	362.066	210.358	405.186	188.252	132.764	272.28	181.137	266.583	347.381
PF3D7_0526900	NA	NA	306.316	265.531	293.929	280.229	383.921	318.434	197.083	178.338	159.888	156.475	183.221	236.355	270.444	327.783	322.458	303.817	185.555	218.868	180.721	266.451	236.011	229.195	215.97	212.366	251.924	282.52	369.308	296.685	215.839	212.394	173.883	142.755	157.013	149.48	255.46	138.195	176.122	210.27	204.893	147.853	231.635	134.69
PF3D7_0527000	DNA replication licensing factor MCM3, putative	MCM3	10.0207	12.2082	9.95998	8.0292	15.5308	16.5449	367.866	402.018	468.033	496.025	724.298	686.67	1099.17	884.189	1287.95	455.464	1097.45	1085.84	5.45241	6.08877	5.67629	5.54023	4.46613	4.49412	9.24943	7.48354	11.9892	9.73315	51.4218	38.3176	119.521	78.051	148.472	72.6681	306.996	205.926	267.836	346.059	600.205	267.466	622.685	562.568
PF3D7_0527100	ubiquitin-conjugating enzyme E2 13	UBC13	613.515	644.442	634.006	619.45	545.684	581.508	1080.09	1052.1	1141.71	1190.74	1112.54	1111.04	1645.44	1727.45	1472.82	992.072	1668.65	1736.57	756.582	777.04	748.829	758.442	561.166	707.635	599.293	561.863	548.088	625.862	574.835	566.562	573.249	561.442	624.272	538.918	573.88	770.102	623.567	548.414	1000.36	659.858	1110.44	917.35
PF3D7_0527200	ubiquitin carboxyl-terminal hydrolase 14	USP14	70.2105	59.7971	61.8507	74.787	82.3714	79.7858	152.227	130.725	127.941	160.279	178.612	272.054	217.521	178.623	248.378	101.917	201.182	169.554	40.1232	61.3907	30.7964	51.846	41.7944	35.1131	40.4205	41.5518	60.7495	43.1405	77.3284	67.544	117.935	98.0021	111.653	98.6167	175.564	116.502	126.551	201.596	148.392	149.83	169.743	161.958
PF3D7_0527300	methionine aminopeptidase 1a, putative	METAP1a	46.4234	51.0356	50.811	42.2456	53.1016	47.8539	195.932	196.462	206.761	173.415	140.207	134.462	152.155	162.8	122.881	81.0637	128.747	133.252	61.0772	34.7256	36.6977	33.4356	44.1938	51.679	46.9242	41.5889	47.8596	56.2258	105.357	91.1219	147.437	114.433	148.934	109.755	86.0038	162.887	50.6901	74.0094	107.853	94.642	101.446	169.08
PF3D7_0527400	NA	NA	17.8017	16.7683	10.8221	25.6635	19.7207	16.1335	8.02517	4.31874	16.9841	21.1428	15.4005	22.1469	12.1527	8.81974	17.5316	15.4642	15.5729	10.4092	22.0308	46.7179	29.8035	21.0513	18.5539	19.672	20.4669	22.9107	21.2912	20.4387	12.5144	14.94	12.6739	11.8779	16.1564	8.10072	24.9442	10.0671	16.8163	19.4896	17.4308	25.9536	15.275	8.17568
PF3D7_0527500	Hsc70-interacting protein	HIP	1104.71	1211.52	1109.44	1054.93	1083.39	1170.23	3155.27	3442.61	3537.06	3909.58	3164.01	3217.7	2217.57	2224.36	1916.29	1544.21	1625.08	2053.02	1226.12	1362.76	1265.37	1220.32	1149.05	1112.6	980.7	1007.09	994.567	1005.9	1429.15	1406.76	2085.58	1798.6	2289.15	1700.75	3020.2	2154.12	4738.77	3448.38	3878.43	3611.45	3579.64	2544.63
PF3D7_0527600	NA	NA	3.16059	3.39513	4.62448	3.18982	5.25886	4.32427	35.2333	31.6707	21.0998	20.9838	15.2564	17.0958	27.1007	43.3457	20.7226	12.3964	24.0424	23.8759	1.06289	0.886794	0.968681	0.162501	1.04797	1.26545	1.86716	2.72808	3.55358	3.55544	7.16193	6.53516	23.8713	13.7533	13.5909	13.288	11.0615	20.6233	11.072	14.2731	11.2478	14.7191	13.9175	28.3997
PF3D7_0527900	ATP-dependent RNA helicase DDX41, putative	DDX41	41.3984	43.804	41.0599	36.8984	59.5056	48.0828	96.7599	96.7559	92.1502	96.1241	91.7062	84.1045	61.1377	78.9345	62.9794	66.4864	46.4883	56.9803	50.093	55.5565	45.5149	53.2946	36.9529	47.7622	46.3179	51.27	62.1957	56.6748	60.6686	56.3264	77.7025	68.7703	70.9405	64.9355	60.7293	79.9137	44.7008	78.973	73.5575	62.4273	48.8367	92.3631
PF3D7_0528000	proteasome maturation factor UMP1, putative	UMP1	62.6621	38.3174	40.2705	76.5556	50.9899	88.3397	69.9153	82.4284	174.121	151.275	200.215	229.829	237.018	148.19	300.07	118.917	206.273	228.217	73.671	157.977	79.9511	73.5078	57.9823	59.4357	45.06	46.6716	39.7006	41.748	75.9498	83.441	82.086	72.2174	102.076	79.3655	239.125	118.303	197.079	204.755	161.444	185.696	156.544	91.6112
PF3D7_0528100	NA	NA	40.6293	42.0339	38.3278	42.2291	57.1349	47.9185	74.4184	64.1134	65.2884	75.9415	83.6463	98.7269	102.216	100.592	121.618	76.6533	98.3468	96.019	42.3876	63.3381	41.797	49.1614	41.2789	47.3891	40.6345	44.6034	53.7966	44.7269	50.1432	46.7456	52.0953	49.4528	52.5274	51.1652	59.8616	55.763	25.9275	52.2991	73.2422	32.477	51.607	74.9115
PF3D7_0528200	eukaryotic translation initiation factor 3 subunit E, putative	EIF3E	159.8	145.609	142.09	165.674	223.308	193.228	215.239	174.943	158.874	165.664	207.037	272.844	157.976	160.422	180.003	179.453	108.959	111.457	160.779	243.954	152.427	206.566	144.993	180.048	188.138	149.559	193.951	164.026	156.445	147.208	200.668	174.086	178.759	174.775	222.34	155.632	112.76	196.791	161.479	135.512	102.778	171.416
PF3D7_0528300	NA	NA	0.378242	0.681417	0.547481	2.1565	0	1.11091	0	0.16993	0.751811	0	0.72716	0.290473	7.65077	3.95617	5.62633	2.5275	12.6635	16.1137	0.487603	0.406819	0.111096	0.894575	0.160253	0.290264	0.131779	0	0.203777	0.101942	0	0	0.35905	0	0	0	0	0	0	0	0.192896	0	1.59617	0.120634
PF3D7_0528400	palmitoyltransferase DHHC7	DHHC7	2.61734	5.82469	2.50705	2.25717	0.775261	0.968977	1.08448	1.66006	0	0.559765	5.54973	1.59617	34.8401	28.7317	40.5121	13.3744	87.2955	62.2461	1.38933	1.32474	0.271326	1.27446	0	0.354451	0.321839	0	0.373257	0.124484	0	0.646055	0	1.16736	0.716571	0.145959	1.37702	0	0.427759	0.216101	0.82443	0	15.7014	1.91502
PF3D7_0528500	F-actin-capping protein subunit alpha, putative	CPalpha	1.42414	1.09956	0.883436	0	0.409781	0.256087	10.8913	16.1781	13.3447	9.12284	22.2941	17.8112	42.6951	31.9191	49.464	17.3335	39.2206	29.2307	1.04909	0.875277	0	0.962346	0.258591	0	0.212643	0.27855	0.164411	0	0.98636	2.84572	1.44844	3.08516	1.18362	1.73587	6.06546	4.42511	11.3051	7.42462	16.6526	4.84265	22.4653	11.4849
PF3D7_0528600	NA	NA	49.6568	64.3553	50.0558	109.056	82.7526	107.895	55.7977	58.9594	153.338	133.972	196.042	209.738	175.623	89.8171	191.938	107.643	138.861	150.117	115.073	201.553	159.394	97.1697	98.4304	151.066	192.157	91.8637	133.284	106.588	72.3672	70.2838	94.2743	90.5407	117.621	87.9871	279.343	107.363	265.253	146.036	233.343	313.961	221.192	85.4076
PF3D7_0528700	peptidyl-prolyl cis-trans isomerase	CYP23	96.5913	102.897	110.498	86.2651	76.651	74.6424	148.994	161.907	149.004	118.172	111.505	109.506	118.246	183.244	133.582	162.383	110.921	98.5586	121.366	87.1221	112.315	140.61	78.4804	116.817	108.944	108.393	108.441	113.193	88.5463	109.453	120.126	111.246	105.632	93.5995	87.9404	93.7432	47.9831	75.5111	96.1033	84.1262	79.1148	157.638
PF3D7_0528800	NA	NA	10.8319	12.5897	14.4141	11.8106	11.3779	11.8752	12.1422	15.2271	20.8355	21.8791	19.8165	16.5027	9.27638	5.96289	6.27291	9.33954	11.6984	8.26985	13.8136	19.1666	10.4682	12.2583	11.1031	9.65318	6.93897	6.6179	7.43577	6.68628	19.905	17.9206	21.5597	28.2596	28.3242	31.911	30.3837	29.7667	13.5913	30.5711	6.50415	27.7237	8.60144	22.511
PF3D7_0528900	NA	NA	0.547267	0.422538	0	0	3.30688	0.344431	1.92744	0	1.63166	3.97947	0.39454	0.315207	0.691854	1.3557	0	0.914242	0.443285	0.914294	0.705498	0.294307	0.482226	0.647167	2.43459	0.944944	0.572001	0.561966	1.32677	1.9912	1.98995	0.765485	0.389624	1.24484	1.27356	2.33471	4.07896	0.892751	1.14038	3.45668	0	2.03539	1.34718	0
PF3D7_0529000	T-cell immunomodulatory protein homolog, putative	TIP	13.4898	16.1941	15.4	13.9289	22.6131	15.6654	28.4448	24.5155	21.1476	31.2204	33.0027	41.9059	33.9974	31.9079	45.1316	23.8439	29.0438	26.8986	13.2389	27.7074	13.1902	17.9076	11.9469	7.71398	12.0982	13.2861	15.6136	13.0885	19.6204	14.9732	24.1648	20.8522	22.886	21.947	29.9684	21.6744	14.8709	30.6615	17.7758	19.68	21.8524	26.8132
PF3D7_0529100	thioredoxin-like protein, putative	ATrx2	4.76777	7.88814	5.91518	4.16063	9.9461	18.4327	31.1848	35.8017	31.9837	41.6853	42.2286	63.9442	43.4834	44.431	56.5965	22.7567	41.3773	32.999	3.51215	4.7617	3.90105	4.83265	8.22431	7.05626	9.61056	8.62597	9.35712	5.78242	13.6214	8.09792	12.1228	14.46	9.9064	18.0799	45.6888	29.9993	49.2016	45.8886	57.8343	36.9844	41.4374	51.8089
PF3D7_0529200	NA	NA	0.114139	0.440625	0.867344	0.278891	0.689686	0.431009	8.36138	6.76873	8.33737	9.54456	11.52	14.1998	8.65763	7.35139	8.60611	2.09743	7.76596	4.38578	0.147139	0.368286	0.100573	0.134974	0	0.131386	0.238594	0.546953	0.461189	0	0.276684	0.957902	2.27529	1.73084	2.65614	1.29848	4.93413	2.97909	9.83067	8.17052	10.3902	5.43365	8.10799	8.51819
PF3D7_0529300	apicoplast TIC22 protein	TIC22	0.67138	0.345576	1.21472	0.820239	0.22538	0.563391	10.7193	7.23903	6.33871	4.88195	9.03496	16.4988	9.61925	9.97891	10.3311	5.60789	7.61342	8.03844	0.288498	0.240701	0	0	0	0	0.467815	0.153203	0.542556	0.542839	2.44124	1.87817	6.37314	4.41178	4.94754	2.54594	0.333601	5.111	0.310889	0.314119	1.71195	0.332932	0.944402	5.9955
PF3D7_0529400	NA	NA	6.21475	5.65408	5.24257	4.06233	7.29529	4.88296	40.5416	36.7591	41.956	41.5447	61.698	47.0577	134.965	105.446	149.234	47.4138	154.994	136.463	2.90868	2.55451	2.37183	2.38732	2.91817	3.78196	3.51674	4.17315	5.53409	5.0569	13.0021	9.74483	17.1346	14.3465	18.4235	12.2338	19.4133	26.8196	8.24849	15.3349	30.3415	15.0755	36.4994	46.7747
PF3D7_0529500	NA	NA	162.225	168.526	151.544	239.024	156.363	165.199	114.27	127.621	155.169	187.744	258.5	294.745	258.777	163.851	274.807	213.432	196.257	222.459	155.276	265.092	247.24	199.66	187.168	235.627	204.487	217.105	165.982	171.698	186.077	189.417	114.504	134.616	157.974	168.315	146.858	179.453	38.2048	143.168	248.994	89.0778	133.93	231.826
PF3D7_0529700	NA	NA	0.25395	0.539196	0.275682	0.155128	0.191812	0	3.48814	4.10725	5.86786	4.15485	3.02081	1.24326	4.4946	2.72605	3.32158	0.318178	4.73107	3.50016	0.327374	0	0.111884	0.22523	0.080695	0.146161	0	0.347694	0.102611	0.153997	1.0773	0.976827	2.98317	1.73294	3.54583	2.10657	1.51422	3.38317	1.49932	2.40602	1.45698	3.02236	1.87541	3.76617
PF3D7_0529800	NA	NA	0.558603	0.96406	0.713419	0.200723	0.529471	0.413606	24.5342	25.465	32.2315	23.6546	21.7938	8.47869	60.1503	46.8314	36.5065	11.3628	86.8736	59.0406	0.635392	0.0706831	0.260584	0.0388572	0.334121	0.643011	0.274753	0.562359	0.690405	0.345383	4.10216	4.22843	8.60892	6.97598	11.3171	7.13362	12.9802	21.0836	4.15389	12.2221	5.88187	19.7978	21.7472	34.7091
PF3D7_0529900	NA	NA	241.194	231.548	209.802	236.651	232.718	228.598	153.942	166.244	159.621	179.595	193.38	216.294	236.818	234.929	257.468	280.25	250.753	240.412	310.93	376.237	372.749	352.563	268.281	299.406	260.828	290.042	235.425	321.945	211.06	227.577	152.463	174.042	149.66	170.295	142.898	153.27	129.199	153.687	210.913	124.622	157.577	203.005
PF3D7_0530000	NA	NA	63.9409	69.6088	51.3655	72.6497	51.5153	37.0228	144.126	140.472	135.353	146.459	186.231	245.273	197.235	242.873	194.815	173.044	241.351	168.246	177.22	315.663	136.91	197.35	130.034	189.895	49.4548	60.8433	63.0398	79.6165	60.4498	87.6481	54.6269	42.6633	46.8714	53.9497	96.2676	90.3986	87.9373	100.518	119.837	124.612	96.6888	152.335
PF3D7_0530100	SNARE protein, putative	SYN6	14.6951	15.1992	14.1467	13.2109	11.4485	13.2621	21.8739	20.927	31.8264	23.8577	25.186	20.441	66.9492	42.1266	51.625	16.6748	70.9687	59.5231	17.1567	15.5071	9.52823	9.83636	6.34348	6.06408	3.76736	10.8191	6.49787	9.6398	26.2127	22.8816	23.6878	19.7614	23.5509	24.7084	20.6655	23.2181	11.5552	10.1185	11.8776	13.6119	14.6257	37.1403
PF3D7_0530200	phosphoenolpyruvate/phosphate translocator	PPT	0.238713	0	0.259141	0	0.360607	0.150238	7.73474	8.3651	12.8109	16.2009	19.2746	28.1855	27.6129	18.5287	42.2427	7.97567	32.2906	27.717	0.307732	0	0.105171	0	0	0	0	0	0.385817	0	1.44666	0.834743	4.41871	2.71494	5.41625	2.26306	15.657	8.56701	11.1091	11.7271	13.513	9.94357	15.866	14.6176
PF3D7_0530300	PhIL1-interacting candidate PIC6	PIC6	0.433048	0.702137	0.235054	0.0529065	0.218059	0.0545091	7.07679	5.95331	7.42394	7.19004	7.99223	5.83645	19.7633	12.73	16.1261	5.13637	22.9402	18.9912	0.111651	0.13973	0.114474	0.204839	0.110084	0.0498484	0	0.0296453	0.0349955	0.0350138	1.31219	1.33259	2.77476	0.919364	2.56978	1.35479	3.35675	4.23856	1.14301	3.40386	2.68328	4.44523	4.59909	8.2868
PF3D7_0530400	NA	NA	0.175524	0.243936	0.495417	0	0.38889	0.265125	4.40148	6.90783	6.90782	5.23294	2.68265	1.01096	3.4616	3.82633	1.02636	0.351868	3.98087	2.9324	0.226273	0.0377571	0.185596	0	0.0892392	0.323275	0.146766	0.26435	0.283689	0.340605	2.25509	2.89705	3.99883	4.09903	5.02413	3.76067	2.14551	6.37562	0.438903	0.936197	0.913042	2.45456	1.82708	4.76953
PF3D7_0530500	NA	NA	0	0	0	0	0.0624815	0.234281	0.349611	0.501715	0.184975	0.375948	0.17891	0.786145	0.156866	0	0.381876	0	0.201014	0.155475	0	0	0	0.0733669	0.0788574	0	0.0648457	0	0	0	0	0	0.0883405	0.376328	0	0.352903	0.184967	0	0.948059	0	0.0949203	0.092298	0.654536	0.178084
PF3D7_0530600	NA	NA	9.0916	14.795	10.6288	5.29738	7.88828	7.04239	24.8279	26.7693	29.817	19.3244	17.1422	7.41159	21.9262	19.1724	12.6986	12.8514	17.4474	13.2027	15.8674	8.42455	8.75057	6.94693	4.26675	8.69432	6.28627	8.7134	7.57317	11.4222	20.1742	19.7599	25.6917	20.7863	30.1084	25.1942	9.38252	35.5944	10.2982	11.9758	6.63382	15.6062	11.9034	25.695
PF3D7_0530700	NA	NA	9.0756	10.6223	12.7389	6.00298	7.74274	7.42179	19.5447	24.3082	26.1969	30.6148	18.2533	12.8517	14.3965	13.8425	8.53936	8.78777	14.5151	15.9831	12.9665	11.7508	9.11758	9.29676	9.99248	8.38419	5.37729	8.3894	5.55903	8.08584	16.8154	15.5244	19.2605	22.2655	23.4069	20.9343	18.3542	29.8613	9.87733	15.335	10.3918	19.0914	11.8718	30.5859
PF3D7_0530750	dolichol-phosphate mannosyltransferase subunit 3, putative	DPM3	0	0	0	0	0	0	8.73068	5.56848	16.4242	18.3595	5.95712	8.72535	21.763	11.372	18.0132	3.45101	23.4259	12.0792	0	0	0	0	0	0	0	0	0	0	0.834613	0.963166	3.92193	2.08841	4.0061	0	2.05293	8.23751	2.86975	4.83259	8.95484	7.17084	13.5607	11.2004
PF3D7_0530800	NA	NA	4.17747	3.79456	4.26821	2.10153	6.43437	5.87694	50.1967	51.0044	50.919	43.1824	28.345	28.5899	39.764	45.4522	41.5945	18.8836	33.4393	45.5695	2.85104	0.264299	0.866115	0.581181	3.74805	1.69719	3.59576	4.03734	2.97874	4.3711	11.9137	16.8422	34.29	33.1648	31.7378	33.5465	14.6523	48.3707	26.2854	25.8686	31.0166	23.3966	35.4305	72.1811
PF3D7_0530900	formin 1	FRM1	0.280996	0.289271	0.127101	0.0572165	0	0.0589497	0.19793	0.0946808	0.209445	0.0851362	0.776548	0.512506	7.22311	5.64604	6.63002	1.4865	14.2254	11.6775	0.120747	0.0251855	0.103167	0.110763	0.267868	0.0269547	0.0734239	0	0	0.0567993	0.0567636	0.229274	0.0333423	0	0.0272463	0.0443986	0.139624	0.101863	0	0.0986023	0.179128	0.348359	2.05868	0.313666
PF3D7_0531000	NA	NA	2.55944	2.52124	1.72457	2.37215	2.66646	1.88855	3.35701	6.42336	8.55186	9.51943	10.8165	15.3515	13.3888	6.70466	17.2476	6.78213	18.8727	10.6161	2.95812	9.11275	4.12167	3.96595	2.58008	2.84459	2.0294	2.77922	2.35362	2.21213	3.744	5.67861	4.2727	3.34588	4.9292	5.43851	5.65711	5.85485	0.85823	3.59246	5.67115	4.33281	4.15892	9.03547
PF3D7_0531100	NA	NA	0.162517	0.0717015	0.126018	0.0283644	0	0.0292237	0.228951	0.250331	0.622981	0.281369	0.636029	0.106977	5.89948	3.64249	3.32249	0.892055	13.5024	8.90166	0	0.0499417	0	0.0823645	0.0295094	0.133625	0.0485322	0.0317871	0	0	0.19698	0.194846	0.0661163	0.0704134	0.270141	0.0880404	0.138434	0.378733	0.0322523	0.293286	0.0532805	0.172695	0.767466	0.777482
PF3D7_0531200	NA	NA	0.585627	0.678232	0.317872	0	0.589778	1.84287	8.66268	10.6556	14.4047	13.1301	10.5549	13.1547	13.3263	14.0237	18.0231	3.42413	14.705	9.05001	0	0.314936	0	0.346265	0.744355	0	0	1.00226	0.236629	0.94701	2.83924	2.45742	5.83708	3.99629	8.17695	4.71911	9.16622	10.827	11.7964	13.5629	6.27183	13.0684	10.5032	14.8487
PF3D7_0531300	NA	NA	0.211696	1.14414	0	0	0	0	5.66642	10.2716	19.2506	14.8804	14.9565	14.8754	14.7194	12.586	18.5681	3.53651	13.3749	15.031	0.272904	0	0.186537	0	0	0.731054	0	0	0	0.342331	1.02635	2.36887	3.01432	2.88921	4.43378	2.20763	9.78261	6.67653	16.7628	8.61704	8.42097	18.5812	11.018	12.5581
[truncated: 4,076 more rows]

## Sheet: Paired_deseq2_tests
Geneid	Description	Name	fdr.1	av.log2FoldChange.1	fdr.2	av.log2FoldChange.2	fdr.3	av.log2FoldChange.3	fdr.4	av.log2FoldChange.4	fdr.5	av.log2FoldChange.5	fdr.6	av.log2FoldChange.6	fdr.7	av.log2FoldChange.7
[truncated: 5,173 more rows]
